# Supplementary material for: Most associations between transcript features and gene expression are monotonic
Source: Royal Society of Chemistry journal article supplement (doi:10.1039/c3mb70617f), 2014-03-17
Supplement: c3mb70617f2.xlsx [file c3mb70617f2.xlsx]

## Sheet: Data
Name	Number of genes	MIC	Spearman (rho2)	MIC Empirical p-value	Diff Empirical p-value	Z Score p-value	Diff Z Score p-value	Number of genes Filtered	MIC Filtered	Spearman Filtered (rho2)	MIC Empirical p-value Filtered	Diff Empirical p-value Filtered	Z Score p-value Filtered	Diff Z Score p-value Filtered	Spearman p-value Filtered	Classification	MIC empirical p-value pass FDR	Filtered MIC empirical p-value pass FDR	empirical p-value non-monotonicity pass FDR	empirical p-value Monotonicity pass FDR	MIC Z score p-value pass FDR	Filtered MIC Z score p-value pass FDR	Z score p-value non-monotonicity pass FDR	Z score p-value monotonicity pass FDR
utr5gc	3971	0.0874564	0.00940376	0.137	0.961	0.142637	0.948483	3955	0.0865405	0.0100001	0.17	0.974	0.18141	0.962594	2.92454e-10	MIC not significant	FALSE	FALSE	FALSE	FALSE	FALSE	FALSE	FALSE	FALSE
utr5gc40	3971	0.0973232	0.010758	0.001	0.209	7.25128e-05	0.205632	3955	0.0968224	0.0114089	0.000178218	0.243129	5.10774e-05	0.24836	1.64553e-11	non-significant monotone/non-monotone	TRUE	TRUE	FALSE	FALSE	TRUE	TRUE	FALSE	FALSE
utr5meanFE	3572	0.0973572	0.0163451	0.001	0.977	0.00115445	0.965158	3572	0.0973572	0.0163451	0.001	0.98	0.0009834	0.971322	1.72271e-14	Monotone	TRUE	TRUE	FALSE	TRUE	TRUE	TRUE	FALSE	TRUE
utr5meanFE40	3572	0.0942451	0.00918217	0.015	0.525	0.0111899	0.544288	3572	0.0942451	0.00918217	0.013	0.57	0.00950233	0.580273	9.56766e-09	non-significant monotone/non-monotone	TRUE	TRUE	FALSE	FALSE	TRUE	TRUE	FALSE	FALSE
utr5bestATG	3971	0.106506	0.0301161	0	0.904515	5.84357e-14	0.901306	720	0.17402	1.86148e-06	0.003	0.003	0.000971262	0.000613744	0.970847	Non-monotone	TRUE	TRUE	FALSE	FALSE	TRUE	TRUE	FALSE	FALSE
utr5MeanATG	3971	0.106506	0.0301924	0	0.908337	6.4996e-14	0.904269	720	0.140064	1.13367e-05	0.719	0.656	0.721707	0.67626	0.928137	MIC not significant	TRUE	FALSE	FALSE	FALSE	TRUE	FALSE	FALSE	FALSE
utr5bestATG30C	3971	0.101847	0.0257357	0	0.837287	7.19261e-11	0.838068	532	0.177905	0.000577788	0.089	0.074	0.0719688	0.0553056	0.580128	MIC not significant	TRUE	FALSE	FALSE	FALSE	TRUE	FALSE	FALSE	FALSE
utr5MeanATG30C	3971	0.101847	0.0256911	0	0.836098	5.7798e-11	0.835442	532	0.156469	0.000332062	0.628	0.569	0.651315	0.603121	0.674959	MIC not significant	TRUE	FALSE	FALSE	FALSE	TRUE	FALSE	FALSE	FALSE
utr5bestATG0	3971	0.0761255	0.00515906	0.625	0.962	0.634243	0.964562	294	0.201445	0.000273493	0.343	0.291	0.379788	0.310105	0.777658	MIC not significant	FALSE	FALSE	FALSE	FALSE	FALSE	FALSE	FALSE	FALSE
utr5MeanATG0	3971	0.0761255	0.00516196	0.595	0.969	0.605318	0.96328	294	0.180254	0.00030993	0.792	0.735	0.79879	0.742867	0.763721	MIC not significant	FALSE	FALSE	FALSE	FALSE	FALSE	FALSE	FALSE	FALSE
utr5bestATG1	3971	0.0902139	0.016449	0.000548387	0.891677	0.000145037	0.888022	375	0.182077	0.00111023	0.387	0.341	0.414208	0.372283	0.520051	MIC not significant	TRUE	FALSE	FALSE	FALSE	TRUE	FALSE	FALSE	FALSE
utr5MeanATG1	3971	0.0902139	0.0164963	0.001	0.901	0.000264678	0.891993	375	0.181468	0.000591172	0.391	0.346	0.42181	0.367192	0.638829	MIC not significant	TRUE	FALSE	FALSE	FALSE	TRUE	FALSE	FALSE	FALSE
utr5bestATG2	3971	0.0908169	0.0142457	0.00016129	0.614161	5.41405e-05	0.624379	354	0.165985	0.00142922	0.755	0.725	0.764962	0.736716	0.478302	MIC not significant	TRUE	FALSE	FALSE	FALSE	TRUE	FALSE	FALSE	FALSE
utr5MeanATG2	3971	0.0908169	0.0142427	0.00016129	0.611194	5.50082e-05	0.622753	354	0.166064	0.0017716	0.793	0.76	0.796296	0.773575	0.429834	MIC not significant	TRUE	FALSE	FALSE	FALSE	TRUE	FALSE	FALSE	FALSE
utr5bestATG030C	3971	0.0798472	0.00412978	0.047	0.316	0.0439331	0.339607	148	0.264967	9.74719e-05	0.177	0.129	0.172484	0.115726	0.905202	MIC not significant	FALSE	FALSE	FALSE	FALSE	FALSE	FALSE	FALSE	FALSE
utr5MeanATG030C	3971	0.0798472	0.00412561	0.04	0.283	0.0345157	0.310309	148	0.264967	0.000271121	0.175	0.133	0.181928	0.129008	0.842553	MIC not significant	FALSE	FALSE	FALSE	FALSE	FALSE	FALSE	FALSE	FALSE
utr5bestATG130C	3971	0.0908819	0.0127911	6.45161e-05	0.249032	3.80752e-06	0.253643	246	0.199285	0.000208161	0.493	0.41	0.506131	0.42801	0.821862	MIC not significant	TRUE	FALSE	FALSE	FALSE	TRUE	FALSE	FALSE	FALSE
utr5MeanATG130C	3971	0.0908819	0.0127925	3.22581e-05	0.246645	3.53845e-06	0.254053	246	0.19619	0.000214229	0.534	0.474	0.578885	0.507997	0.819329	MIC not significant	TRUE	FALSE	FALSE	FALSE	TRUE	FALSE	FALSE	FALSE
utr5bestATG230C	3971	0.0925846	0.0130926	0	0.123822	1.54317e-07	0.121508	234	0.229081	0.000130944	0.151	0.112	0.150719	0.106499	0.861776	MIC not significant	TRUE	FALSE	FALSE	FALSE	TRUE	FALSE	FALSE	FALSE
utr5MeanATG230C	3971	0.0925846	0.0130801	0	0.124812	1.82689e-07	0.123216	234	0.201407	1.00568e-05	0.597	0.509	0.627792	0.55625	0.961516	MIC not significant	TRUE	FALSE	FALSE	FALSE	TRUE	FALSE	FALSE	FALSE
utr5numATGs	3971	0.106506	0.0302155	0	0.907327	7.99462e-14	0.904569	720	0.153974	3.64264e-05	0.084	0.069	0.0861484	0.0682263	0.871568	MIC not significant	TRUE	FALSE	FALSE	FALSE	TRUE	FALSE	FALSE	FALSE
utr5numATGs0	3971	0.0761255	0.00516377	0.628	0.974	0.625279	0.964107	294	0.217478	0.000754377	0.035	0.027	0.0278324	0.019208	0.639052	MIC not significant	FALSE	FALSE	FALSE	FALSE	FALSE	TRUE	FALSE	FALSE
utr5numATGs1	3971	0.0902139	0.0161906	0.000451613	0.873419	0.000141918	0.872435	375	0.195888	0.0101352	0.053	0.1	0.0351924	0.0853404	0.0514171	MIC not significant	TRUE	FALSE	FALSE	FALSE	TRUE	TRUE	FALSE	FALSE
utr5numATGs2	3971	0.0908169	0.0143863	0.001	0.627	5.95796e-05	0.64126	354	0.192809	1.36616e-05	0.059	0.041	0.0464549	0.0306682	0.944753	MIC not significant	TRUE	FALSE	FALSE	FALSE	TRUE	FALSE	FALSE	FALSE
utr5numATGs30C	3971	0.101847	0.0261143	0	0.864822	6.7245e-11	0.863624	532	0.140232	0.00570358	0.742	0.834	0.752049	0.830325	0.0818037	MIC not significant	TRUE	FALSE	FALSE	FALSE	TRUE	FALSE	FALSE	FALSE
utr5numATGs030C	3971	0.0798472	0.00417646	0.059	0.351	0.0522257	0.361511	148	0.174437	0.0149419	0.87	0.954	0.866897	0.925891	0.138866	MIC not significant	FALSE	FALSE	FALSE	FALSE	FALSE	FALSE	FALSE	FALSE
utr5numATGs130C	3971	0.0908819	0.0127235	3.22581e-05	0.236903	2.95612e-06	0.243848	246	0.162736	0.00109545	0.703	0.652	0.721378	0.674078	0.605426	MIC not significant	TRUE	FALSE	FALSE	FALSE	TRUE	FALSE	FALSE	FALSE
utr5numATGs230C	3971	0.0925846	0.0131749	0	0.130574	1.81647e-07	0.128691	234	0.169069	0.0085305	0.659	0.751	0.695295	0.775759	0.159044	MIC not significant	TRUE	FALSE	FALSE	FALSE	TRUE	FALSE	FALSE	FALSE
utr5distATG	3971	0.106506	0.0313463	0	0.955782	5.3289e-14	0.949862	720	0.135054	0.00342643	0.66	0.725	0.669416	0.732214	0.116579	MIC not significant	TRUE	FALSE	FALSE	FALSE	TRUE	FALSE	FALSE	FALSE
utr5distATG0	3971	0.0761255	0.00529162	0.583	0.962	0.594533	0.957022	294	0.206199	0.00544244	0.131	0.154	0.130196	0.151457	0.207211	MIC not significant	FALSE	FALSE	FALSE	FALSE	FALSE	FALSE	FALSE	FALSE
utr5distATG1	3971	0.0902139	0.0168378	0.002	0.911	0.000206444	0.906248	375	0.176504	0.00115639	0.322	0.297	0.344903	0.308438	0.511497	MIC not significant	TRUE	FALSE	FALSE	FALSE	TRUE	FALSE	FALSE	FALSE
utr5distATG2	3971	0.0908169	0.0147385	0.000387097	0.668742	5.54037e-05	0.677483	354	0.170724	0.00430457	0.424	0.463	0.44829	0.484716	0.218177	MIC not significant	TRUE	FALSE	FALSE	FALSE	TRUE	FALSE	FALSE	FALSE
utr5Lens	3971	0.0998568	0.0183014	9.90099e-06	0.731693	2.61592e-06	0.736005	3971	0.0998568	0.0183014	3.9604e-05	0.732673	2.60462e-06	0.737314	1.11264e-17	non-significant monotone/non-monotone	TRUE	TRUE	FALSE	FALSE	TRUE	TRUE	FALSE	FALSE
utr5uORFsBio	3971	0.106506	0.0302155	0	0.908644	6.50315e-14	0.90538	720	0.153974	3.64264e-05	0.094	0.083	0.0871837	0.0710466	0.871568	MIC not significant	TRUE	FALSE	FALSE	FALSE	TRUE	FALSE	FALSE	FALSE
u5maxLenuORFs	3971	0.106506	0.0300966	0	0.902634	6.6719e-14	0.899439	720	0.127035	5.97127e-06	0.882	0.857	0.88262	0.855295	0.947811	MIC not significant	TRUE	FALSE	FALSE	FALSE	TRUE	FALSE	FALSE	FALSE
u5meanLenuORFs	3971	0.106506	0.0303591	0	0.91668	5.98958e-14	0.912539	720	0.136937	0.000207955	0.582	0.539	0.593137	0.55289	0.699279	MIC not significant	TRUE	FALSE	FALSE	FALSE	TRUE	FALSE	FALSE	FALSE
u5maxCostuORFs	3971	0.106506	0.0301273	0	0.90497	6.91132e-14	0.901414	720	0.137308	2.80152e-05	0.656	0.605	0.675416	0.626092	0.887255	MIC not significant	TRUE	FALSE	FALSE	FALSE	TRUE	FALSE	FALSE	FALSE
u5meanCostuORFs	3971	0.106506	0.0303986	0	0.920069	5.77798e-14	0.915258	720	0.14759	0.000302869	0.275	0.244	0.287535	0.252876	0.641073	MIC not significant	TRUE	FALSE	FALSE	FALSE	TRUE	FALSE	FALSE	FALSE
utr5uORFs30C	3971	0.101847	0.0261143	0	0.864356	7.09481e-11	0.863403	532	0.140232	0.00570358	0.745	0.846	0.763157	0.845117	0.0818037	MIC not significant	TRUE	FALSE	FALSE	FALSE	TRUE	FALSE	FALSE	FALSE
u5maxLenuORFs30C	3971	0.101847	0.0260886	0	0.863049	6.60845e-11	0.861828	532	0.149374	0.0040483	0.609	0.681	0.62941	0.691089	0.142762	MIC not significant	TRUE	FALSE	FALSE	FALSE	TRUE	FALSE	FALSE	FALSE
u5meanLenuORFs30C	3971	0.101847	0.0261254	0	0.86597	6.9061e-11	0.864614	532	0.153971	0.00452922	0.43	0.516	0.464175	0.546555	0.121051	MIC not significant	TRUE	FALSE	FALSE	FALSE	TRUE	FALSE	FALSE	FALSE
u5maxCostuORFs30C	3971	0.101847	0.0260392	0	0.859842	6.63286e-11	0.85863	532	0.159601	0.00332583	0.364	0.397	0.388656	0.434685	0.184131	MIC not significant	TRUE	FALSE	FALSE	FALSE	TRUE	FALSE	FALSE	FALSE
u5meanCostuORFs30C	3971	0.101847	0.0260899	0	0.863078	6.9392e-11	0.861609	532	0.155216	0.0039528	0.519	0.594	0.551056	0.614017	0.147573	MIC not significant	TRUE	FALSE	FALSE	FALSE	TRUE	FALSE	FALSE	FALSE
utr5uORFs0	3971	0.0761255	0.00516377	0.619	0.971	0.617844	0.966204	294	0.217478	0.000754377	0.053	0.04	0.0415721	0.0295297	0.639052	MIC not significant	FALSE	FALSE	FALSE	FALSE	FALSE	FALSE	FALSE	FALSE
utr5uORFs1	3971	0.0902139	0.0161906	0.000225806	0.877387	0.000156939	0.874868	375	0.195888	0.0101352	0.037	0.085	0.0338688	0.0822459	0.0514171	non-significant monotone/non-monotone	TRUE	FALSE	FALSE	FALSE	TRUE	TRUE	FALSE	FALSE
utr5uORFs2	3971	0.0908169	0.0143863	0.000258065	0.626774	5.74783e-05	0.636106	354	0.192809	1.36616e-05	0.071	0.049	0.0524231	0.0350619	0.944753	MIC not significant	TRUE	FALSE	FALSE	FALSE	TRUE	FALSE	FALSE	FALSE
u5maxLenuORFs0	3971	0.0761255	0.00507635	0.559	0.963	0.583786	0.953219	294	0.219625	0.000775454	0.042	0.031	0.0316394	0.0233059	0.634406	MIC not significant	FALSE	FALSE	FALSE	FALSE	FALSE	TRUE	FALSE	FALSE
u5maxLenuORFs1	3971	0.0902139	0.0165983	0.001	0.915	0.000180889	0.901335	375	0.159122	0.000268867	0.722	0.668	0.737913	0.692007	0.75163	MIC not significant	TRUE	FALSE	FALSE	FALSE	TRUE	FALSE	FALSE	FALSE
u5maxLenuORFs2	3971	0.0908169	0.0143648	0.001	0.626	5.21181e-05	0.633345	354	0.166569	8.14643e-05	0.499	0.45	0.523284	0.466527	0.865622	MIC not significant	TRUE	FALSE	FALSE	FALSE	TRUE	FALSE	FALSE	FALSE
u5meanLenuORFs0	3971	0.0761255	0.00507573	0.59	0.966	0.594853	0.96165	294	0.207129	0.000957871	0.131	0.105	0.120864	0.0959257	0.597125	MIC not significant	FALSE	FALSE	FALSE	FALSE	FALSE	FALSE	FALSE	FALSE
u5meanLenuORFs1	3971	0.0902139	0.0167049	0.001	0.901	0.000260368	0.896187	375	0.149618	0.00127952	0.9	0.873	0.883401	0.865545	0.489818	MIC not significant	TRUE	FALSE	FALSE	FALSE	TRUE	FALSE	FALSE	FALSE
u5meanLenuORFs2	3971	0.0908169	0.0143833	0.000193548	0.628161	5.0194e-05	0.637322	354	0.156115	0.000118919	0.758	0.69	0.770047	0.718361	0.837996	MIC not significant	TRUE	FALSE	FALSE	FALSE	TRUE	FALSE	FALSE	FALSE
u5maxCostuORFs0	3971	0.0761255	0.00510052	0.622	0.977	0.636907	0.967184	294	0.189527	0.000236063	0.529	0.453	0.557767	0.483979	0.793062	MIC not significant	FALSE	FALSE	FALSE	FALSE	FALSE	FALSE	FALSE	FALSE
u5maxCostuORFs1	3971	0.0902139	0.016638	0.001	0.897	0.000143895	0.89865	375	0.165163	0.000861566	0.72	0.686	0.73452	0.690923	0.570964	MIC not significant	TRUE	FALSE	FALSE	FALSE	TRUE	FALSE	FALSE	FALSE
u5maxCostuORFs2	3971	0.0908169	0.0143793	6.45161e-05	0.625419	4.63838e-05	0.63567	354	0.164368	9.96829e-06	0.77	0.708	0.768754	0.70794	0.952798	MIC not significant	TRUE	FALSE	FALSE	FALSE	TRUE	FALSE	FALSE	FALSE
u5meanCostuORFs0	3971	0.0761255	0.00509716	0.603	0.961	0.606469	0.956696	294	0.199208	0.000383678	0.336	0.279	0.347846	0.283927	0.738032	MIC not significant	FALSE	FALSE	FALSE	FALSE	FALSE	FALSE	FALSE	FALSE
u5meanCostuORFs1	3971	0.0902139	0.0167376	0.000483871	0.906903	0.000157839	0.902035	375	0.152012	0.0022076	0.953	0.942	0.932333	0.928562	0.364234	MIC not significant	TRUE	FALSE	FALSE	FALSE	TRUE	FALSE	FALSE	FALSE
u5meanCostuORFs2	3971	0.0908169	0.0144056	0.001	0.617	0.000108623	0.634035	354	0.147328	1.84535e-05	0.977	0.959	0.964769	0.948751	0.935809	MIC not significant	TRUE	FALSE	FALSE	FALSE	TRUE	FALSE	FALSE	FALSE
utr5uORFs030C	3971	0.0798472	0.00417646	0.053	0.333	0.0480614	0.342469	148	0.174437	0.0149419	0.861	0.941	0.855876	0.916517	0.138866	MIC not significant	FALSE	FALSE	FALSE	FALSE	FALSE	FALSE	FALSE	FALSE
utr5uORFs130C	3971	0.0908819	0.0127235	3.22581e-05	0.244742	3.51912e-06	0.24997	246	0.162736	0.00109545	0.678	0.621	0.702785	0.657883	0.605426	MIC not significant	TRUE	FALSE	FALSE	FALSE	TRUE	FALSE	FALSE	FALSE
utr5uORFs230C	3971	0.0925846	0.0131749	0	0.129713	1.76301e-07	0.128437	234	0.169069	0.0085305	0.679	0.773	0.70486	0.779558	0.159044	MIC not significant	TRUE	FALSE	FALSE	FALSE	TRUE	FALSE	FALSE	FALSE
u5maxLenuORFs030C	3971	0.0798472	0.00412531	0.034	0.304	0.0302912	0.310561	148	0.283098	0.000111808	0.034	0.029	0.0289371	0.0176805	0.898505	Non-monotone	FALSE	TRUE	FALSE	FALSE	FALSE	TRUE	FALSE	FALSE
u5maxLenuORFs130C	3971	0.0908819	0.012901	6.45161e-05	0.255355	3.12964e-06	0.264616	246	0.170831	0.00793958	0.769	0.833	0.774603	0.824731	0.163559	MIC not significant	TRUE	FALSE	FALSE	FALSE	TRUE	FALSE	FALSE	FALSE
u5maxLenuORFs230C	3971	0.0925846	0.0132544	0	0.13403	1.77055e-07	0.13359	234	0.199438	0.0093556	0.41	0.487	0.427752	0.514834	0.140176	MIC not significant	TRUE	FALSE	FALSE	FALSE	TRUE	FALSE	FALSE	FALSE
u5meanLenuORFs030C	3971	0.0798472	0.00412154	0.042	0.329	0.0407258	0.34492	148	0.284284	0.000278799	0.045	0.031	0.0296727	0.0178682	0.840368	Non-monotone	FALSE	FALSE	FALSE	FALSE	FALSE	TRUE	FALSE	FALSE
u5meanLenuORFs130C	3971	0.0908819	0.0129446	0.001	0.262	4.21418e-06	0.271182	246	0.156828	0.0125805	0.939	0.983	0.913408	0.957447	0.0791239	MIC not significant	TRUE	FALSE	FALSE	FALSE	TRUE	FALSE	FALSE	FALSE
u5meanLenuORFs230C	3971	0.0925846	0.0132337	0	0.134139	1.95151e-07	0.133293	234	0.192654	0.00703573	0.495	0.549	0.534986	0.585768	0.201077	MIC not significant	TRUE	FALSE	FALSE	FALSE	TRUE	FALSE	FALSE	FALSE
u5maxCostuORFs030C	3971	0.0798472	0.00413306	0.058	0.338	0.0466394	0.350979	148	0.276428	4.31817e-07	0.077	0.058	0.0607284	0.0354404	0.993676	MIC not significant	FALSE	FALSE	FALSE	FALSE	FALSE	FALSE	FALSE	FALSE
u5maxCostuORFs130C	3971	0.0908819	0.0128942	9.90099e-06	0.257812	3.52037e-06	0.26374	246	0.192473	0.00756024	0.49	0.568	0.522628	0.59505	0.174026	MIC not significant	TRUE	FALSE	FALSE	FALSE	TRUE	FALSE	FALSE	FALSE
u5maxCostuORFs230C	3971	0.0925846	0.0132342	0	0.133168	1.72404e-07	0.132388	234	0.197617	0.00703896	0.606	0.658	0.622516	0.668379	0.200973	MIC not significant	TRUE	FALSE	FALSE	FALSE	TRUE	FALSE	FALSE	FALSE
u5meanCostuORFs030C	3971	0.0798472	0.00412972	0.04	0.298	0.0342255	0.310343	148	0.276428	1.60308e-05	0.073	0.045	0.0631504	0.0384255	0.96148	MIC not significant	FALSE	FALSE	FALSE	FALSE	FALSE	FALSE	FALSE	FALSE
u5meanCostuORFs130C	3971	0.0908819	0.0129335	3.22581e-05	0.264032	4.03733e-06	0.270167	246	0.164948	0.0116506	0.942	0.983	0.92738	0.966559	0.0911703	MIC not significant	TRUE	FALSE	FALSE	FALSE	TRUE	FALSE	FALSE	FALSE
u5meanCostuORFs230C	3971	0.0925846	0.0132213	0	0.134475	1.80225e-07	0.13279	234	0.182886	0.00565279	0.869	0.884	0.863228	0.875756	0.251972	MIC not significant	TRUE	FALSE	FALSE	FALSE	TRUE	FALSE	FALSE	FALSE
rutr5bestATG	3933	0.134482	0.0807035	0	1	1.02265e-60	1	3932	0.134272	0.0803954	0	1	3.2534e-60	1	1.33983e-73	Monotone	TRUE	TRUE	FALSE	TRUE	TRUE	TRUE	FALSE	TRUE
rutr5MeanATG	3933	0.134482	0.0809615	0	1	1.0113e-60	1	3932	0.134272	0.0806531	0	1	2.21207e-60	1	7.71244e-74	Monotone	TRUE	TRUE	FALSE	TRUE	TRUE	TRUE	FALSE	TRUE
rutr5bestATG30C	3933	0.134639	0.0756249	0	1	3.59411e-61	1	3932	0.134418	0.0753226	0	1	1.01975e-60	1	6.85076e-69	Monotone	TRUE	TRUE	FALSE	TRUE	TRUE	TRUE	FALSE	TRUE
rutr5MeanATG30C	3933	0.134639	0.0755913	0	1	1.70659e-61	1	3932	0.134418	0.0752891	0	1	2.45566e-60	1	7.35847e-69	Monotone	TRUE	TRUE	FALSE	TRUE	TRUE	TRUE	FALSE	TRUE
rutr5bestATG0	3933	0.120871	0.0579943	0	1	1.32493e-32	1	3932	0.120521	0.0577171	0	1	3.04406e-32	1	9.73975e-53	Monotone	TRUE	TRUE	FALSE	TRUE	TRUE	TRUE	FALSE	TRUE
rutr5MeanATG0	3933	0.120871	0.0580362	0	1	4.80312e-33	1	3932	0.120521	0.057759	0	1	3.53873e-32	1	8.92261e-53	Monotone	TRUE	TRUE	FALSE	TRUE	TRUE	TRUE	FALSE	TRUE
rutr5bestATG1	3933	0.124591	0.0674985	0	1	2.33526e-39	1	3932	0.124191	0.0672073	0	1	1.1283e-38	1	2.07616e-61	Monotone	TRUE	TRUE	FALSE	TRUE	TRUE	TRUE	FALSE	TRUE
rutr5MeanATG1	3933	0.124591	0.0676428	0	1	1.04519e-39	1	3932	0.124191	0.0673513	0	1	7.34747e-39	1	1.53121e-61	Monotone	TRUE	TRUE	FALSE	TRUE	TRUE	TRUE	FALSE	TRUE
rutr5bestATG2	3933	0.120622	0.0647708	0	1	1.68068e-32	1	3932	0.120398	0.0644832	0	1	2.99757e-32	1	6.52863e-59	Monotone	TRUE	TRUE	FALSE	TRUE	TRUE	TRUE	FALSE	TRUE
rutr5MeanATG2	3933	0.120622	0.0648811	0	1	2.42423e-32	1	3932	0.120398	0.0645933	0	1	7.09419e-32	1	5.17551e-59	Monotone	TRUE	TRUE	FALSE	TRUE	TRUE	TRUE	FALSE	TRUE
rutr5bestATG030C	3933	0.121895	0.0570039	0	1	3.27294e-34	1	3932	0.121672	0.0567284	0	1	1.5965e-34	1	7.7129e-52	Monotone	TRUE	TRUE	FALSE	TRUE	TRUE	TRUE	FALSE	TRUE
rutr5MeanATG030C	3933	0.121895	0.0570043	0	1	9.85701e-35	1	3932	0.121672	0.0567288	0	1	4.86216e-34	1	7.70598e-52	Monotone	TRUE	TRUE	FALSE	TRUE	TRUE	TRUE	FALSE	TRUE
rutr5bestATG130C	3933	0.1269	0.0629266	0	1	1.0717e-43	1	3932	0.126961	0.0626417	0	1	2.79658e-44	1	3.15628e-57	Monotone	TRUE	TRUE	FALSE	TRUE	TRUE	TRUE	FALSE	TRUE
rutr5MeanATG130C	3933	0.1269	0.0629332	0	1	5.88229e-44	1	3932	0.126961	0.0626484	0	1	2.62136e-44	1	3.11254e-57	Monotone	TRUE	TRUE	FALSE	TRUE	TRUE	TRUE	FALSE	TRUE
rutr5bestATG230C	3933	0.125225	0.0638096	0	1	7.36373e-41	1	3932	0.124902	0.0635235	0	1	4.22508e-40	1	4.93213e-58	Monotone	TRUE	TRUE	FALSE	TRUE	TRUE	TRUE	FALSE	TRUE
rutr5MeanATG230C	3933	0.125225	0.0637838	0	1	9.10477e-41	1	3932	0.124902	0.0634976	0	1	4.05931e-40	1	5.20787e-58	Monotone	TRUE	TRUE	FALSE	TRUE	TRUE	TRUE	FALSE	TRUE
utr5_PARS_numBP_all	2435	0.103962	0.00679435	0.096	0.471	0.0883858	0.484566	1225	0.123426	0.000400367	0.343	0.322	0.369012	0.346936	0.48413	MIC not significant	FALSE	FALSE	FALSE	FALSE	FALSE	FALSE	FALSE	FALSE
orfgc	3971	0.125457	0.0566752	0	1	8.7999e-41	1	3971	0.125457	0.0566752	0	1	1.69075e-40	1	2.75025e-52	Monotone	TRUE	TRUE	FALSE	TRUE	TRUE	TRUE	FALSE	TRUE
orfmeanFE	3971	0.160127	0.122548	0	1	2.27163e-135	1	3971	0.160127	0.122548	0	1	1.30439e-136	1	7.65829e-115	Monotone	TRUE	TRUE	FALSE	TRUE	TRUE	TRUE	FALSE	TRUE
orfbestATG	3971	0.121454	0.0658662	0	1	9.36196e-30	1	3966	0.121207	0.06501	0	1	3.58914e-29	1	6.82607e-60	Monotone	TRUE	TRUE	FALSE	TRUE	TRUE	TRUE	FALSE	TRUE
orfMeanATG	3971	0.108982	0.0321265	0	0.999693	6.48237e-15	0.998514	3966	0.108727	0.0314493	0	0.999416	1.33822e-14	0.997917	2.21446e-29	Monotone	TRUE	TRUE	FALSE	TRUE	TRUE	TRUE	FALSE	TRUE
orfbestATG30C	3971	0.0895211	0.00674931	0.072	0.64	0.0584945	0.667003	3037	0.0943226	0.00465655	0.348	0.81	0.378715	0.810454	0.000167608	MIC not significant	FALSE	FALSE	FALSE	FALSE	FALSE	FALSE	FALSE	FALSE
orfMeanATG30C	3971	0.090617	0.00636568	0.037	0.466	0.025036	0.500892	3037	0.102549	0.00412493	0.011	0.091	0.00731464	0.0751796	0.000397694	non-significant monotone/non-monotone	FALSE	TRUE	FALSE	FALSE	FALSE	TRUE	FALSE	FALSE
orfbestATG200C	3971	0.0912924	0.0115145	0.017	0.934	0.0165445	0.923215	3966	0.0907552	0.0110619	0.027	0.949	0.0213627	0.934736	3.1393e-11	non-significant monotone/non-monotone	TRUE	TRUE	FALSE	FALSE	TRUE	TRUE	FALSE	FALSE
orfMeanATG200C	3971	0.0905924	0.00698211	0.071	0.758	0.0567684	0.754805	3966	0.0909319	0.00662061	0.052	0.673	0.0445707	0.688083	2.88078e-07	MIC not significant	FALSE	FALSE	FALSE	FALSE	FALSE	FALSE	FALSE	FALSE
orfbestATG0	3971	0.125696	0.0573867	0	1	4.01421e-39	1	3860	0.117912	0.0467456	0	1	2.74834e-26	0.999987	4.62817e-42	Monotone	TRUE	TRUE	FALSE	TRUE	TRUE	TRUE	FALSE	TRUE
orfMeanATG0	3971	0.104576	0.0296969	0	0.99999	1.31203e-10	0.999827	3860	0.102852	0.0208914	9.90099e-06	0.898535	1.22842e-08	0.892099	1.80461e-19	non-significant monotone/non-monotone	TRUE	TRUE	FALSE	FALSE	TRUE	TRUE	FALSE	FALSE
orfbestATG1	3971	0.117099	0.0626654	0	1	1.12854e-24	1	3941	0.115358	0.0590275	0	1	3.43507e-23	1	4.75039e-54	Monotone	TRUE	TRUE	FALSE	TRUE	TRUE	TRUE	FALSE	TRUE
orfMeanATG1	3971	0.109128	0.0314381	0	0.998614	2.63962e-15	0.996339	3941	0.106421	0.0284625	0	0.996505	1.04431e-12	0.99291	1.4963e-26	Monotone	TRUE	TRUE	FALSE	TRUE	TRUE	TRUE	FALSE	TRUE
orfbestATG2	3971	0.120184	0.0594738	0	1	1.62527e-29	1	3484	0.104887	0.0287371	3.8835e-05	0.999971	2.16581e-07	0.999773	7.09614e-24	Monotone	TRUE	TRUE	FALSE	TRUE	TRUE	TRUE	FALSE	TRUE
orfMeanATG2	3971	0.115639	0.0462408	0	1	2.12605e-24	1	3484	0.10401	0.0173579	7.92079e-05	0.746802	2.47656e-06	0.752143	5.81777e-15	non-significant monotone/non-monotone	TRUE	TRUE	FALSE	FALSE	TRUE	TRUE	FALSE	FALSE
orfbestATG030C	3971	0.0838349	0.000558588	0.368	0.394	0.377962	0.411525	1064	0.139447	0.00146527	0.108	0.122	0.0977501	0.107405	0.212175	MIC not significant	FALSE	FALSE	FALSE	FALSE	FALSE	FALSE	FALSE	FALSE
orfMeanATG030C	3971	0.0838349	0.000541059	0.312	0.338	0.334205	0.364924	1064	0.139759	0.00116227	0.081	0.088	0.0755025	0.0775766	0.26654	MIC not significant	FALSE	FALSE	FALSE	FALSE	FALSE	FALSE	FALSE	FALSE
orfbestATG130C	3971	0.0900787	0.00306233	0.04	0.151	0.0319559	0.152722	2356	0.107813	0.00252503	0.052	0.128	0.046896	0.118521	0.0147158	MIC not significant	FALSE	FALSE	FALSE	FALSE	FALSE	FALSE	FALSE	FALSE
orfMeanATG130C	3971	0.089129	0.00289282	0.074	0.252	0.0685909	0.243183	2356	0.10211	0.00211889	0.384	0.528	0.393525	0.554641	0.0254635	MIC not significant	FALSE	FALSE	FALSE	FALSE	FALSE	FALSE	FALSE	FALSE
orfbestATG230C	3971	0.0812553	0.000953613	0.446	0.52	0.44273	0.523526	678	0.134009	0.00471543	0.929	0.973	0.919482	0.958991	0.0739629	MIC not significant	FALSE	FALSE	FALSE	FALSE	FALSE	FALSE	FALSE	FALSE
orfMeanATG230C	3971	0.0812553	0.000946075	0.447	0.51	0.449849	0.526573	678	0.145629	0.00435329	0.569	0.687	0.585471	0.693218	0.0860337	MIC not significant	FALSE	FALSE	FALSE	FALSE	FALSE	FALSE	FALSE	FALSE
orfbestATG0200C	3971	0.0891874	0.00314604	0.081	0.313	0.0799918	0.320757	3689	0.0871479	0.00139363	0.508	0.648	0.531143	0.666152	0.0233644	MIC not significant	FALSE	FALSE	FALSE	FALSE	FALSE	FALSE	FALSE	FALSE
orfMeanATG0200C	3971	0.086174	0.00268662	0.388	0.703	0.391711	0.709802	3689	0.0870447	0.00105033	0.626	0.722	0.638763	0.726136	0.049037	MIC not significant	FALSE	FALSE	FALSE	FALSE	FALSE	FALSE	FALSE	FALSE
orfbestATG1200C	3971	0.099146	0.0100797	0.000129032	0.0799032	1.81489e-06	0.0748407	3936	0.0969574	0.00817887	0.000277228	0.0791683	2.73483e-05	0.0727345	1.31849e-08	non-significant monotone/non-monotone	TRUE	TRUE	FALSE	FALSE	TRUE	TRUE	FALSE	FALSE
orfMeanATG1200C	3971	0.0988351	0.00700741	3.22581e-05	0.0251613	5.89356e-06	0.0179086	3936	0.0993035	0.00539478	7.92079e-05	0.00521782	2.37156e-06	0.00212174	3.97304e-06	Non-monotone	TRUE	TRUE	FALSE	FALSE	TRUE	TRUE	FALSE	FALSE
orfbestATG2200C	3971	0.0909559	0.00351224	0.024	0.148	0.0188446	0.143569	2668	0.0951903	0.00179466	0.602	0.749	0.61597	0.748787	0.0286593	MIC not significant	FALSE	FALSE	FALSE	FALSE	TRUE	FALSE	FALSE	FALSE
orfMeanATG2200C	3971	0.0937936	0.00323819	0.002	0.026	0.00189296	0.0242762	2668	0.0965527	0.00138347	0.531	0.638	0.563458	0.660983	0.0547337	MIC not significant	TRUE	FALSE	FALSE	FALSE	TRUE	FALSE	FALSE	FALSE
orfnumATGs	3971	0.171238	0.159991	0	1	3.8238e-138	1	3966	0.170647	0.158998	0	1	8.82723e-136	1	2.81149e-151	Monotone	TRUE	TRUE	FALSE	TRUE	TRUE	TRUE	FALSE	TRUE
orfnumATGs0	3971	0.148323	0.122527	0	1	1.51619e-76	1	3860	0.142994	0.111556	0	1	1.23172e-62	1	3.0983e-101	Monotone	TRUE	TRUE	FALSE	TRUE	TRUE	TRUE	FALSE	TRUE
orfnumATGs1	3971	0.16156	0.14383	0	1	2.68114e-110	1	3941	0.158596	0.139916	0	1	5.10584e-103	1	4.06626e-131	Monotone	TRUE	TRUE	FALSE	TRUE	TRUE	TRUE	FALSE	TRUE
orfnumATGs2	3971	0.137777	0.0941188	0	1	3.54296e-54	1	3484	0.129101	0.0638406	0	1	8.92512e-29	1	7.02538e-52	Monotone	TRUE	TRUE	FALSE	TRUE	TRUE	TRUE	FALSE	TRUE
orfnumATGs30C	3971	0.0916252	0.00528754	0.015	0.212	0.0116981	0.207157	3037	0.0950702	0.00267674	0.181	0.357	0.189283	0.374129	0.00434561	MIC not significant	TRUE	FALSE	FALSE	FALSE	TRUE	FALSE	FALSE	FALSE
orfnumATGs030C	3971	0.0838349	0.000470071	0.356	0.385	0.357981	0.380984	1064	0.135892	0.000439486	0.052	0.044	0.0411876	0.0340434	0.494547	MIC not significant	FALSE	FALSE	FALSE	FALSE	FALSE	FALSE	FALSE	FALSE
orfnumATGs130C	3971	0.0878592	0.00298852	0.112	0.342	0.118778	0.344341	2356	0.0985769	0.00255984	0.464	0.641	0.477652	0.647658	0.0140464	MIC not significant	FALSE	FALSE	FALSE	FALSE	FALSE	FALSE	FALSE	FALSE
orfnumATGs230C	3971	0.0812553	0.000863076	0.424	0.495	0.436724	0.504943	678	0.136014	0.00305529	0.358	0.423	0.390243	0.446402	0.150517	MIC not significant	FALSE	FALSE	FALSE	FALSE	FALSE	FALSE	FALSE	FALSE
orfnumATGs200C	3971	0.105081	0.022196	0	0.587713	6.92033e-10	0.598747	3966	0.104737	0.021595	0	0.567812	1.59489e-09	0.579515	1.37655e-20	non-significant monotone/non-monotone	TRUE	TRUE	FALSE	FALSE	TRUE	TRUE	FALSE	FALSE
orfnumATGs0200C	3971	0.0957604	0.00341953	0.002	0.011	0.000326075	0.00583855	3689	0.0879854	0.0015774	0.305	0.415	0.304951	0.43376	0.0158478	MIC not significant	TRUE	FALSE	FALSE	FALSE	TRUE	FALSE	FALSE	FALSE
orfnumATGs1200C	3971	0.106978	0.0218097	0	0.335426	1.98259e-11	0.342653	3936	0.105576	0.019192	0	0.193158	1.66767e-10	0.195674	2.53036e-18	non-significant monotone/non-monotone	TRUE	TRUE	FALSE	FALSE	TRUE	TRUE	FALSE	FALSE
orfnumATGs2200C	3971	0.0890625	0.0047129	0.067	0.363	0.0589378	0.388014	2668	0.0908662	0.00415917	0.776	0.95	0.780157	0.944711	0.000858914	MIC not significant	FALSE	FALSE	FALSE	FALSE	FALSE	FALSE	FALSE	FALSE
orfdistATG	3971	0.0911946	0.00880738	0.027	0.625	0.0243114	0.649106	3966	0.0907647	0.00840467	0.022	0.671	0.0272792	0.67066	7.30188e-09	non-significant monotone/non-monotone	FALSE	TRUE	FALSE	FALSE	FALSE	TRUE	FALSE	FALSE
orfdistATG0	3971	0.0845573	5.42257e-05	0.418	0.399	0.44199	0.419964	3860	0.0818161	0.000973789	0.721	0.786	0.73921	0.798264	0.0525484	MIC not significant	FALSE	FALSE	FALSE	FALSE	FALSE	FALSE	FALSE	FALSE
orfdistATG1	3971	0.0919752	0.00564214	0.014	0.224	0.00966574	0.219948	3941	0.0901742	0.00418353	0.037	0.232	0.0327014	0.229422	4.83583e-05	non-significant monotone/non-monotone	TRUE	FALSE	FALSE	FALSE	TRUE	TRUE	FALSE	FALSE
orfdistATG2	3971	0.0869572	0.0058392	0.2	0.764	0.194284	0.772619	3484	0.0862572	0.00244686	0.565	0.76	0.578368	0.772152	0.003495	MIC not significant	FALSE	FALSE	FALSE	FALSE	FALSE	FALSE	FALSE	FALSE
orfLens	3971	0.171802	0.164737	0	1	1.06034e-139	1	3971	0.171802	0.164737	0	1	2.14319e-141	1	2.24813e-157	Monotone	TRUE	TRUE	FALSE	TRUE	TRUE	TRUE	FALSE	TRUE
orfuORFs	3971	0.157453	0.110057	0	1	9.05634e-99	1	3694	0.174436	0.160426	0	1	3.64537e-129	1	2.12664e-142	Monotone	TRUE	TRUE	FALSE	TRUE	TRUE	TRUE	FALSE	TRUE
orfmaxLenuORFs	3971	0.149685	0.108751	0	1	1.04606e-79	1	3694	0.172804	0.158521	0	1	8.78812e-125	1	1.40342e-140	Monotone	TRUE	TRUE	FALSE	TRUE	TRUE	TRUE	FALSE	TRUE
orfmeanLenuORFs	3971	0.135536	0.0731532	0	1	5.18154e-62	1	3694	0.141786	0.108638	0	1	1.9214e-66	1	2.50688e-94	Monotone	TRUE	TRUE	FALSE	TRUE	TRUE	TRUE	FALSE	TRUE
orfmaxCostuORFs	3971	0.162306	0.10818	0	1	2.37651e-146	1	3694	0.172709	0.157743	0	1	2.85778e-161	1	7.75519e-140	Monotone	TRUE	TRUE	FALSE	TRUE	TRUE	TRUE	FALSE	TRUE
orfmeanCostuORFs	3971	0.142913	0.0717499	0	1	2.04145e-82	0.999999	3694	0.149744	0.106679	0	1	3.0021e-86	1	1.45727e-92	Monotone	TRUE	TRUE	FALSE	TRUE	TRUE	TRUE	FALSE	TRUE
orfuORFs30C	3971	0.0916252	0.00528754	0.018	0.206	0.0105193	0.209217	3037	0.0950702	0.00267674	0.176	0.356	0.184392	0.362092	0.00434561	MIC not significant	TRUE	FALSE	FALSE	FALSE	TRUE	FALSE	FALSE	FALSE
orfmaxLenuORFs30C	3971	0.0881565	0.00562665	0.137	0.624	0.123179	0.637768	3037	0.0948922	0.00314824	0.176	0.391	0.182357	0.41657	0.00197954	MIC not significant	FALSE	FALSE	FALSE	FALSE	FALSE	FALSE	FALSE	FALSE
orfmeanLenuORFs30C	3971	0.0864673	0.00425871	0.229	0.624	0.232827	0.650957	3037	0.0917649	0.00155482	0.457	0.58	0.475445	0.592669	0.0297828	MIC not significant	FALSE	FALSE	FALSE	FALSE	FALSE	FALSE	FALSE	FALSE
orfmaxCostuORFs30C	3971	0.101011	0.00549825	0	0.000970297	3.29407e-07	0.000301961	3037	0.116893	0.00298069	0	0	2.10297e-11	1.85118e-09	0.00261489	Non-monotone	TRUE	TRUE	TRUE	FALSE	TRUE	TRUE	TRUE	FALSE
orfmeanCostuORFs30C	3971	0.088931	0.00413945	0.081	0.374	0.0757706	0.386788	3037	0.0986068	0.00143083	0.049	0.077	0.0406993	0.0749831	0.0371183	MIC not significant	FALSE	FALSE	FALSE	FALSE	FALSE	FALSE	FALSE	FALSE
orfuORFs200C	3971	0.106327	0.0236018	0	0.602673	8.64555e-11	0.613712	3928	0.104172	0.0216917	0	0.603713	2.74966e-09	0.613656	1.72108e-20	non-significant monotone/non-monotone	TRUE	TRUE	FALSE	FALSE	TRUE	TRUE	FALSE	FALSE
orfmaxLenuORFs200C	3971	0.160536	0.130208	0	1	1.53815e-107	1	3928	0.160715	0.129279	0	1	1.69202e-107	1	3.39472e-120	Monotone	TRUE	TRUE	FALSE	TRUE	TRUE	TRUE	FALSE	TRUE
orfmeanLenuORFs200C	3971	0.139186	0.0849738	0	1	6.25747e-70	1	3928	0.139054	0.0833359	0	1	2.6614e-70	1	2.89739e-76	Monotone	TRUE	TRUE	FALSE	TRUE	TRUE	TRUE	FALSE	TRUE
orfmaxCostuORFs200C	3971	0.158323	0.129736	0	1	1.4079e-131	1	3928	0.157904	0.128793	0	1	2.24984e-129	1	1.01795e-119	Monotone	TRUE	TRUE	FALSE	TRUE	TRUE	TRUE	FALSE	TRUE
orfmeanCostuORFs200C	3971	0.131698	0.0845173	0	1	1.14956e-53	1	3928	0.130558	0.0828704	0	1	4.24425e-51	1	7.87076e-76	Monotone	TRUE	TRUE	FALSE	TRUE	TRUE	TRUE	FALSE	TRUE
orfuORFs0	3971	0.148323	0.122527	0	1	1.54704e-76	1	3860	0.142994	0.111556	0	1	2.62244e-63	1	3.0983e-101	Monotone	TRUE	TRUE	FALSE	TRUE	TRUE	TRUE	FALSE	TRUE
orfuORFs1	3971	0.160396	0.110666	0	1	8.91821e-108	1	3751	0.159613	0.140653	0	1	6.1337e-95	1	1.37665e-125	Monotone	TRUE	TRUE	FALSE	TRUE	TRUE	TRUE	FALSE	TRUE
orfuORFs2	3971	0.136613	0.0841174	0	1	8.1436e-52	1	3394	0.13114	0.0626072	0	1	2.11418e-29	1	1.30475e-49	Monotone	TRUE	TRUE	FALSE	TRUE	TRUE	TRUE	FALSE	TRUE
orfmaxLenuORFs0	3971	0.170419	0.15891	0	1	1.97498e-136	1	3860	0.168925	0.148911	0	1	5.77297e-128	1	2.77379e-137	Monotone	TRUE	TRUE	FALSE	TRUE	TRUE	TRUE	FALSE	TRUE
orfmaxLenuORFs1	3971	0.095028	0.0138383	0.00177419	0.76471	0.000872219	0.768155	3751	0.0953344	0.0177945	0.005	0.984	0.00215173	0.977826	2.32795e-16	Monotone	TRUE	TRUE	FALSE	TRUE	TRUE	TRUE	FALSE	TRUE
orfmaxLenuORFs2	3971	0.121925	0.0497402	0	0.999891	7.11115e-28	0.999562	3394	0.10515	0.0248653	2.9703e-05	0.975723	3.69965e-06	0.970314	2.44116e-20	Monotone	TRUE	TRUE	FALSE	TRUE	TRUE	TRUE	FALSE	TRUE
orfmeanLenuORFs0	3971	0.171358	0.148684	0	1	2.35969e-165	1	3860	0.164155	0.13843	0	1	2.30194e-136	1	5.16576e-127	Monotone	TRUE	TRUE	FALSE	TRUE	TRUE	TRUE	FALSE	TRUE
orfmeanLenuORFs1	3971	0.0918276	0.001886	0.01	0.04	0.00911995	0.0305241	3751	0.0956004	0.00225513	0.003	0.007	0.00095616	0.00607181	0.00362466	Non-monotone	TRUE	TRUE	FALSE	FALSE	TRUE	TRUE	FALSE	FALSE
orfmeanLenuORFs2	3971	0.101364	0.0238224	0	0.967584	3.37879e-07	0.962384	3394	0.0935438	0.00393619	0.07	0.305	0.0757787	0.305265	0.000254874	MIC not significant	TRUE	FALSE	FALSE	FALSE	TRUE	FALSE	FALSE	FALSE
orfmaxCostuORFs0	3971	0.171018	0.158256	0	1	1.23364e-180	1	3860	0.16919	0.148219	0	1	4.66461e-167	1	1.33326e-136	Monotone	TRUE	TRUE	FALSE	TRUE	TRUE	TRUE	FALSE	TRUE
orfmaxCostuORFs1	3971	0.0913413	0.0136809	0.014	0.979	0.0119491	0.965479	3751	0.0914756	0.0175926	0.0415644	0.999921	0.0342821	0.999379	3.44114e-16	Monotone	TRUE	FALSE	FALSE	FALSE	TRUE	TRUE	FALSE	TRUE
orfmaxCostuORFs2	3971	0.121778	0.0485059	0	0.999683	5.78408e-28	0.998807	3394	0.104558	0.0237335	3.9604e-05	0.97195	5.83784e-06	0.963698	1.7859e-19	Monotone	TRUE	TRUE	FALSE	TRUE	TRUE	TRUE	FALSE	FALSE
orfmeanCostuORFs0	3971	0.172214	0.148959	0	1	2.37093e-186	1	3860	0.164814	0.138693	0	1	2.46861e-150	1	2.8603e-127	Monotone	TRUE	TRUE	FALSE	TRUE	TRUE	TRUE	FALSE	TRUE
orfmeanCostuORFs1	3971	0.0934677	0.00182079	0.004	0.017	0.00266743	0.0126533	3751	0.0967193	0.00217661	0.003	0.01	0.000683422	0.00505313	0.00426377	Non-monotone	TRUE	TRUE	FALSE	FALSE	TRUE	TRUE	FALSE	FALSE
orfmeanCostuORFs2	3971	0.102479	0.0224146	0	0.884277	2.16028e-08	0.879094	3394	0.0914536	0.00319927	0.206	0.484	0.222807	0.502117	0.000978559	MIC not significant	TRUE	FALSE	FALSE	FALSE	TRUE	FALSE	FALSE	FALSE
orfuORFs030C	3971	0.0838349	0.000470071	0.343	0.37	0.358407	0.379141	1064	0.135892	0.000439486	0.068	0.053	0.0515196	0.0435219	0.494547	MIC not significant	FALSE	FALSE	FALSE	FALSE	FALSE	FALSE	FALSE	FALSE
orfuORFs130C	3971	0.0878592	0.00298852	0.131	0.347	0.130014	0.360289	2356	0.0985769	0.00255984	0.415	0.593	0.450766	0.621253	0.0140464	MIC not significant	FALSE	FALSE	FALSE	FALSE	FALSE	FALSE	FALSE	FALSE
orfuORFs230C	3971	0.0812553	0.000863076	0.425	0.48	0.440116	0.505457	678	0.136014	0.00305529	0.383	0.438	0.400875	0.453616	0.150517	MIC not significant	FALSE	FALSE	FALSE	FALSE	FALSE	FALSE	FALSE	FALSE
orfmaxLenuORFs030C	3971	0.0838349	0.00328039	0.349	0.677	0.357977	0.691562	1064	0.209529	0.167486	0	1	3.19773e-26	1	3.1821e-44	MIC not significant	FALSE	TRUE	FALSE	FALSE	FALSE	TRUE	FALSE	FALSE
orfmaxLenuORFs130C	3971	0.0823405	0.00174137	0.69	0.827	0.688637	0.822845	2356	0.095764	0.0001666	0.702	0.686	0.715513	0.69897	0.531184	MIC not significant	FALSE	FALSE	FALSE	FALSE	FALSE	FALSE	FALSE	FALSE
orfmaxLenuORFs230C	3971	0.0812553	0.000725345	0.451	0.507	0.465989	0.521697	678	0.15975	0.000425879	0.06	0.049	0.0532112	0.0439504	0.591671	MIC not significant	FALSE	FALSE	FALSE	FALSE	FALSE	FALSE	FALSE	FALSE
orfmeanLenuORFs030C	3971	0.0838349	0.00327793	0.347	0.668	0.353898	0.681972	1064	0.212721	0.167285	0	1	9.97757e-29	1	3.61853e-44	MIC not significant	FALSE	TRUE	FALSE	FALSE	FALSE	TRUE	FALSE	FALSE
orfmeanLenuORFs130C	3971	0.0819934	0.00139802	0.701	0.814	0.702683	0.806784	2356	0.0965012	1.11416e-06	0.66	0.624	0.664958	0.634583	0.95916	MIC not significant	FALSE	FALSE	FALSE	FALSE	FALSE	FALSE	FALSE	FALSE
orfmeanLenuORFs230C	3971	0.0812553	0.000707282	0.429	0.466	0.438155	0.490281	678	0.145471	0.000785319	0.37	0.344	0.387624	0.359281	0.466316	MIC not significant	FALSE	FALSE	FALSE	FALSE	FALSE	FALSE	FALSE	FALSE
orfmaxCostuORFs030C	3971	0.0883196	0.00327006	0.046	0.203	0.0411841	0.204789	1064	0.215093	0.16659	0	1	1.54879e-31	1	5.64896e-44	Monotone	FALSE	TRUE	FALSE	FALSE	FALSE	TRUE	FALSE	FALSE
orfmaxCostuORFs130C	3971	0.0824821	0.00165032	0.673	0.803	0.676762	0.807305	2356	0.0978072	9.61971e-05	0.541	0.513	0.572525	0.545852	0.634198	MIC not significant	FALSE	FALSE	FALSE	FALSE	FALSE	FALSE	FALSE	FALSE
orfmaxCostuORFs230C	3971	0.0812553	0.000703878	0.468	0.507	0.481915	0.533736	678	0.165105	0.000862573	0.027	0.024	0.0198727	0.0165912	0.44517	MIC not significant	FALSE	TRUE	FALSE	FALSE	FALSE	TRUE	FALSE	FALSE
orfmeanCostuORFs030C	3971	0.0838349	0.00326937	0.364	0.71	0.371151	0.697647	1064	0.211294	0.166533	0	1	9.37774e-29	1	5.85838e-44	MIC not significant	FALSE	TRUE	FALSE	FALSE	FALSE	TRUE	FALSE	FALSE
orfmeanCostuORFs130C	3971	0.0816704	0.00130658	0.713	0.831	0.738051	0.827461	2356	0.100102	5.82835e-06	0.354	0.322	0.394314	0.359306	0.906765	MIC not significant	FALSE	FALSE	FALSE	FALSE	FALSE	FALSE	FALSE	FALSE
orfmeanCostuORFs230C	3971	0.0812553	0.00068783	0.442	0.501	0.462648	0.511558	678	0.160492	0.00130284	0.056	0.064	0.0485147	0.0485142	0.348027	MIC not significant	FALSE	FALSE	FALSE	FALSE	FALSE	FALSE	FALSE	FALSE
orfuORFs0200C	3971	0.0957604	0.00341953	0.000645161	0.00790323	0.000262224	0.00543871	3689	0.0879854	0.0015774	0.291	0.426	0.297221	0.432362	0.0158478	MIC not significant	TRUE	FALSE	FALSE	FALSE	TRUE	FALSE	FALSE	FALSE
orfuORFs1200C	3971	0.107488	0.0228463	0	0.390535	8.6521e-12	0.40117	3903	0.105617	0.0190684	0	0.230267	6.69695e-10	0.233716	4.48724e-18	non-significant monotone/non-monotone	TRUE	TRUE	FALSE	FALSE	TRUE	TRUE	FALSE	FALSE
orfuORFs2200C	3971	0.0889056	0.0047631	0.071	0.419	0.0715361	0.412386	2662	0.0908644	0.00410929	0.788	0.944	0.782617	0.944379	0.000935447	MIC not significant	FALSE	FALSE	FALSE	FALSE	FALSE	FALSE	FALSE	FALSE
orfmaxLenuORFs0200C	3971	0.160536	0.128955	0	1	5.25771e-108	1	3689	0.176886	0.15299	0	1	4.43811e-135	1	3.872e-135	Monotone	TRUE	TRUE	FALSE	TRUE	TRUE	TRUE	FALSE	TRUE
orfmaxLenuORFs1200C	3971	0.0878312	0.000961575	0.144	0.193	0.14246	0.191221	3903	0.0887805	0.000192346	0.105	0.098	0.0945109	0.0927995	0.386375	MIC not significant	FALSE	FALSE	FALSE	FALSE	FALSE	FALSE	FALSE	FALSE
orfmaxLenuORFs2200C	3971	0.0858912	0.0052613	0.29	0.805	0.297227	0.815983	2662	0.100948	0.00497957	0.077	0.351	0.0804923	0.360557	0.000268791	MIC not significant	FALSE	FALSE	FALSE	FALSE	FALSE	FALSE	FALSE	FALSE
orfmeanLenuORFs0200C	3971	0.16225	0.128556	0	1	1.10956e-119	1	3689	0.175254	0.1525	0	1	1.39007e-146	1	1.12789e-134	Monotone	TRUE	TRUE	FALSE	TRUE	TRUE	TRUE	FALSE	TRUE
orfmeanLenuORFs1200C	3971	0.0852624	0.000158611	0.371	0.357	0.37902	0.369465	3903	0.0871803	0.000974551	0.19	0.245	0.192847	0.254603	0.0511581	MIC not significant	FALSE	FALSE	FALSE	FALSE	FALSE	FALSE	FALSE	FALSE
orfmeanLenuORFs2200C	3971	0.0842331	0.0044391	0.438	0.868	0.464145	0.867832	2662	0.0887258	0.00330641	0.892	0.979	0.897561	0.971614	0.00299916	MIC not significant	FALSE	FALSE	FALSE	FALSE	FALSE	FALSE	FALSE	FALSE
orfmaxCostuORFs0200C	3971	0.160631	0.128206	0	1	4.919e-139	1	3689	0.175398	0.152026	0	1	8.36996e-171	1	3.1636e-134	Monotone	TRUE	TRUE	FALSE	TRUE	TRUE	TRUE	FALSE	TRUE
orfmaxCostuORFs1200C	3971	0.0888826	0.000940062	0.079	0.112	0.0771411	0.111321	3903	0.0886128	0.000182277	0.108	0.102	0.109849	0.106244	0.3991	MIC not significant	FALSE	FALSE	FALSE	FALSE	FALSE	FALSE	FALSE	FALSE
orfmaxCostuORFs2200C	3971	0.0849721	0.00491846	0.378	0.869	0.401765	0.859137	2662	0.0989201	0.00426044	0.185	0.459	0.19197	0.48744	0.000752516	MIC not significant	FALSE	FALSE	FALSE	FALSE	FALSE	FALSE	FALSE	FALSE
orfmeanCostuORFs0200C	3971	0.164405	0.128289	0	1	1.08064e-152	1	3689	0.173842	0.152146	0	1	9.1104e-165	1	2.43391e-134	Monotone	TRUE	TRUE	FALSE	TRUE	TRUE	TRUE	FALSE	TRUE
orfmeanCostuORFs1200C	3971	0.0847274	0.000180726	0.545	0.536	0.558877	0.547565	3903	0.0874732	0.00103086	0.248	0.335	0.259557	0.354782	0.0448854	MIC not significant	FALSE	FALSE	FALSE	FALSE	FALSE	FALSE	FALSE	FALSE
orfmeanCostuORFs2200C	3971	0.08103	0.00403405	0.82	0.981	0.817558	0.977286	2662	0.0904063	0.00256545	0.873	0.953	0.859315	0.94305	0.00895595	MIC not significant	FALSE	FALSE	FALSE	FALSE	FALSE	FALSE	FALSE	FALSE
rorf5bestATG	3933	0.147356	0.0981692	0	1	1.54119e-95	1	3932	0.14752	0.0978509	0	1	2.75836e-95	1	5.37398e-90	Monotone	TRUE	TRUE	FALSE	TRUE	TRUE	TRUE	FALSE	TRUE
rorfMeanATG	3933	0.12712	0.0748231	0	1	5.95956e-44	1	3932	0.126901	0.0745302	0	1	1.25144e-43	1	3.70669e-68	Monotone	TRUE	TRUE	FALSE	TRUE	TRUE	TRUE	FALSE	TRUE
rorf5bestATG30C	3933	0.107284	0.0298231	0	0.998307	2.22566e-13	0.995794	3930	0.107808	0.029355	0	0.994396	6.7549e-14	0.990008	2.84469e-27	Monotone	TRUE	TRUE	FALSE	TRUE	TRUE	TRUE	FALSE	TRUE
rorfMeanATG30C	3933	0.109438	0.0298092	0	0.980762	7.3173e-16	0.972415	3930	0.109353	0.0293414	0	0.973248	1.35768e-15	0.964421	2.92516e-27	Monotone	TRUE	TRUE	FALSE	TRUE	TRUE	TRUE	FALSE	FALSE
rorf5bestATG200C	3933	0.122636	0.0605275	0	1	1.90873e-35	1	3932	0.122915	0.0602539	0	1	8.21677e-36	1	4.77211e-55	Monotone	TRUE	TRUE	FALSE	TRUE	TRUE	TRUE	FALSE	TRUE
rorfMeanATG200C	3933	0.117498	0.057495	0	1	9.67879e-27	1	3932	0.118119	0.0572267	0	1	7.18199e-28	1	2.71893e-52	Monotone	TRUE	TRUE	FALSE	TRUE	TRUE	TRUE	FALSE	TRUE
rorfbestATG0	3933	0.14564	0.0977397	0	1	5.17962e-90	1	3932	0.145189	0.0974124	0	1	5.06496e-88	1	1.39964e-89	Monotone	TRUE	TRUE	FALSE	TRUE	TRUE	TRUE	FALSE	TRUE
rorfMeanATG0	3933	0.13817	0.0774016	0	1	1.72945e-69	1	3932	0.138051	0.0770957	0	1	3.63108e-69	1	1.55849e-70	Monotone	TRUE	TRUE	FALSE	TRUE	TRUE	TRUE	FALSE	TRUE
rorfbestATG1	3933	0.141369	0.0999639	0	1	1.42636e-77	1	3933	0.141369	0.0999639	0	1	2.47293e-77	1	5.03078e-92	Monotone	TRUE	TRUE	FALSE	TRUE	TRUE	TRUE	FALSE	TRUE
rorfMeanATG1	3933	0.13327	0.0772506	0	1	2.96724e-57	1	3933	0.13327	0.0772506	0	1	2.39495e-57	1	1.07538e-70	Monotone	TRUE	TRUE	FALSE	TRUE	TRUE	TRUE	FALSE	TRUE
rorfbestATG2	3933	0.148883	0.102396	0	1	6.51901e-99	1	3932	0.148671	0.102067	0	1	3.91942e-99	1	5.29392e-94	Monotone	TRUE	TRUE	FALSE	TRUE	TRUE	TRUE	FALSE	TRUE
rorfMeanATG2	3933	0.144028	0.0923984	0	1	3.2627e-85	1	3932	0.143666	0.0920782	0	1	3.16067e-84	1	1.53729e-84	Monotone	TRUE	TRUE	FALSE	TRUE	TRUE	TRUE	FALSE	TRUE
rorfbestATG030C	3933	0.102547	0.0289756	0	1	3.73712e-09	0.999919	3932	0.102375	0.0287616	0	0.99999	6.21458e-09	0.999916	9.26668e-27	Monotone	TRUE	TRUE	FALSE	TRUE	TRUE	TRUE	FALSE	TRUE
rorfMeanATG030C	3933	0.101601	0.0289872	9.90099e-06	1	2.41519e-08	0.999979	3932	0.101521	0.0287732	0	1	2.44434e-08	0.999976	9.05064e-27	Monotone	TRUE	TRUE	FALSE	TRUE	TRUE	TRUE	FALSE	TRUE
rorfbestATG130C	3933	0.0992771	0.0221234	6.45161e-05	0.998839	2.00896e-06	0.996662	3930	0.0986218	0.0217106	4.9505e-05	0.999228	6.54425e-06	0.997487	1.62003e-20	Monotone	TRUE	TRUE	FALSE	TRUE	TRUE	TRUE	FALSE	TRUE
rorfMeanATG130C	3933	0.101474	0.0222267	0	0.985218	4.47182e-08	0.977509	3930	0.100823	0.0218132	9.90099e-06	0.98897	1.75216e-07	0.982202	1.31527e-20	Monotone	TRUE	TRUE	FALSE	TRUE	TRUE	TRUE	FALSE	TRUE
rorfbestATG230C	3933	0.112709	0.0361348	0	0.99903	2.27729e-20	0.997052	3932	0.112595	0.0359027	0	0.998911	5.91333e-20	0.99661	4.18536e-33	Monotone	TRUE	TRUE	FALSE	TRUE	TRUE	TRUE	FALSE	TRUE
rorfMeanATG230C	3933	0.111717	0.0361372	0	0.999782	5.2475e-19	0.998965	3932	0.11155	0.0359051	0	0.999713	1.10841e-18	0.998889	4.16474e-33	Monotone	TRUE	TRUE	FALSE	TRUE	TRUE	TRUE	FALSE	TRUE
rorfbestATG0200C	3933	0.110403	0.0359758	0	0.99999	5.80637e-17	0.999879	3932	0.110176	0.035742	0	0.99998	1.4299e-16	0.999881	5.82054e-33	Monotone	TRUE	TRUE	FALSE	TRUE	TRUE	TRUE	FALSE	TRUE
rorfMeanATG0200C	3933	0.11101	0.0370248	0	1	8.17962e-18	0.999936	3932	0.110633	0.0367883	0	0.99999	3.85684e-17	0.999945	6.79563e-34	Monotone	TRUE	TRUE	FALSE	TRUE	TRUE	TRUE	FALSE	TRUE
rorfbestATG1200C	3933	0.13023	0.0585628	0	1	7.92676e-51	0.999998	3933	0.13023	0.0585628	0	1	1.92312e-50	0.999998	1.60697e-53	Monotone	TRUE	TRUE	FALSE	TRUE	TRUE	TRUE	FALSE	TRUE
rorfMeanATG1200C	3933	0.129382	0.0568348	0	1	9.16051e-49	0.999992	3933	0.129382	0.0568348	0	1	1.21912e-48	0.999991	5.99522e-52	Monotone	TRUE	TRUE	FALSE	TRUE	TRUE	TRUE	FALSE	TRUE
rorfbestATG2200C	3933	0.103939	0.022545	0	0.912257	4.07098e-10	0.905094	3932	0.103857	0.0223526	0	0.907139	4.42784e-10	0.899352	4.29986e-21	non-significant monotone/non-monotone	TRUE	TRUE	FALSE	FALSE	TRUE	TRUE	FALSE	FALSE
rorfMeanATG2200C	3933	0.103304	0.0227679	0	0.955139	1.37715e-09	0.945699	3932	0.103221	0.0225748	0	0.952167	1.86418e-09	0.942071	2.73772e-21	Monotone	TRUE	TRUE	FALSE	FALSE	TRUE	TRUE	FALSE	FALSE
orftAI	3971	0.283508	0.307218	0	1	0	1	3971	0.283508	0.307218	0	1	0	1	1.05386000000000e-318	Monotone	TRUE	TRUE	FALSE	TRUE	TRUE	TRUE	FALSE	TRUE
orfCAI	3971	0.280676	0.275961	0	1	0	1	3971	0.280676	0.275961	0	1	0	1	1.19982e-280	Monotone	TRUE	TRUE	FALSE	TRUE	TRUE	TRUE	FALSE	TRUE
scATGcs	3933	0.123219	0.0529264	0	1	4.17514e-37	0.999999	3933	0.123219	0.0529264	0	1	7.76543e-37	0.999999	2.10434e-48	Monotone	TRUE	TRUE	FALSE	TRUE	TRUE	TRUE	FALSE	TRUE
TASEPCsct	3971	0.702268	0.844974	0	1	0	1	3971	0.702268	0.844974	0	1	0	1	0	Monotone	TRUE	TRUE	FALSE	TRUE	TRUE	TRUE	FALSE	TRUE
orf_PARS_numBP_all	2435	0.0992742	0.00215585	0.46	0.63	0.479186	0.646068	2435	0.0992742	0.00215585	0.483	0.642	0.499295	0.659026	0.0219497	MIC not significant	FALSE	FALSE	FALSE	FALSE	FALSE	FALSE	FALSE	FALSE
orfdn	2343	0.219519	0.221119	0	1	3.84588e-167	1	2337	0.217191	0.217355	0	1	2.4174e-161	1	1.92886e-126	Monotone	TRUE	TRUE	FALSE	TRUE	TRUE	TRUE	FALSE	TRUE
orfdsAdj	2343	0.115242	0.0268853	0.001	1	0.000612686	0.998811	2343	0.115242	0.0268853	0.00266337	0.999713	0.00067874	0.998659	1.38666e-15	Monotone	TRUE	TRUE	FALSE	TRUE	TRUE	TRUE	FALSE	TRUE
orfdn_dsAdj	2343	0.223867	0.217007	0	1	1.31988e-179	1	2337	0.222717	0.213248	0	1	5.67699e-174	1	8.78184e-124	Monotone	TRUE	TRUE	FALSE	TRUE	TRUE	TRUE	FALSE	TRUE
utr3gc	3971	0.09138	0.0137343	0.019	0.97	0.0154068	0.961166	3949	0.0897891	0.0159672	0.0384257	0.998396	0.0334451	0.996319	1.585e-15	Monotone	TRUE	FALSE	FALSE	FALSE	TRUE	TRUE	FALSE	TRUE
utr3gc40	3971	0.0847343	0.00185828	0.42	0.607	0.421909	0.607084	3949	0.0831631	0.00263471	0.511	0.78	0.529005	0.767711	0.00125226	MIC not significant	FALSE	FALSE	FALSE	FALSE	FALSE	FALSE	FALSE	FALSE
utr3meanFE	3669	0.0833466	0.000414797	0.922	0.922	0.905513	0.911423	3669	0.0833466	0.000414797	0.902	0.912	0.909572	0.917957	0.217443	MIC not significant	FALSE	FALSE	FALSE	FALSE	FALSE	FALSE	FALSE	FALSE
utr3meanFE40	3669	0.0858638	0.000121611	0.449	0.441	0.458419	0.442583	3669	0.0858638	0.000121611	0.417	0.402	0.443397	0.426926	0.504281	MIC not significant	FALSE	FALSE	FALSE	FALSE	FALSE	FALSE	FALSE	FALSE
utr3bestATG	3971	0.0873931	1.88224e-05	0.152	0.136	0.161103	0.143078	3194	0.0983137	0.000380035	0.032	0.029	0.0157903	0.0169012	0.270717	MIC not significant	FALSE	TRUE	FALSE	FALSE	FALSE	TRUE	FALSE	FALSE
utr3MeanATG	3971	0.0842789	3.38134e-08	0.544	0.512	0.570439	0.538647	3194	0.0923951	0.000171349	0.474	0.455	0.477903	0.459327	0.459584	MIC not significant	FALSE	FALSE	FALSE	FALSE	FALSE	FALSE	FALSE	FALSE
utr3bestATG0	3971	0.0881347	1.66539e-05	0.12	0.11	0.119736	0.107913	1972	0.111263	0.000816518	0.172	0.181	0.174246	0.192385	0.204662	MIC not significant	FALSE	FALSE	FALSE	FALSE	FALSE	FALSE	FALSE	FALSE
utr3MeanATG0	3971	0.0881347	3.31763e-05	0.124	0.11	0.121128	0.108546	1972	0.111439	0.00121524	0.197	0.237	0.206854	0.250782	0.121733	MIC not significant	FALSE	FALSE	FALSE	FALSE	FALSE	FALSE	FALSE	FALSE
utr3bestATG1	3971	0.0883869	6.5684e-06	0.107	0.1	0.113229	0.100993	1864	0.114453	0.00101822	0.103	0.116	0.0954532	0.115218	0.168483	MIC not significant	FALSE	FALSE	FALSE	FALSE	FALSE	FALSE	FALSE	FALSE
utr3MeanATG1	3971	0.0883869	2.98811e-08	0.106	0.099	0.103291	0.0904213	1864	0.103461	0.000472149	0.849	0.843	0.848801	0.843518	0.348445	MIC not significant	FALSE	FALSE	FALSE	FALSE	FALSE	FALSE	FALSE	FALSE
utr3bestATG2	3971	0.0835072	0.000630905	0.562	0.611	0.578522	0.620739	1927	0.109446	0.00131289	0.31	0.372	0.327105	0.388118	0.11182	MIC not significant	FALSE	FALSE	FALSE	FALSE	FALSE	FALSE	FALSE	FALSE
utr3MeanATG2	3971	0.0835072	0.000551673	0.559	0.582	0.56109	0.597401	1927	0.116838	0.000888182	0.057	0.058	0.0371962	0.0435782	0.190977	MIC not significant	FALSE	FALSE	FALSE	FALSE	FALSE	FALSE	FALSE	FALSE
utr3numATGs	3971	0.0885258	5.39024e-05	0.102	0.094	0.0893543	0.080731	3194	0.0899173	0.000605638	0.464	0.498	0.485813	0.515764	0.164378	MIC not significant	FALSE	FALSE	FALSE	FALSE	FALSE	FALSE	FALSE	FALSE
utr3numATGs0	3971	0.0881347	5.39946e-05	0.111	0.102	0.112349	0.101332	1972	0.110944	0.000242061	0.138	0.13	0.120743	0.111764	0.489877	MIC not significant	FALSE	FALSE	FALSE	FALSE	FALSE	FALSE	FALSE	FALSE
utr3numATGs1	3971	0.0883869	6.57017e-05	0.11	0.1	0.11248	0.101212	1864	0.102863	0.00411215	0.637	0.848	0.646575	0.836699	0.00561294	MIC not significant	FALSE	FALSE	FALSE	FALSE	FALSE	FALSE	FALSE	FALSE
utr3numATGs2	3971	0.0835072	0.000423666	0.559	0.573	0.552267	0.569447	1927	0.104649	0.000371256	0.487	0.469	0.503303	0.493009	0.397916	MIC not significant	FALSE	FALSE	FALSE	FALSE	FALSE	FALSE	FALSE	FALSE
utr3distATG	3971	0.139172	0.0699706	0	1	3.42281e-57	0.999987	3194	0.169862	0.156206	0	1	1.55916e-94	1	6.69808e-120	Monotone	TRUE	TRUE	FALSE	TRUE	TRUE	TRUE	FALSE	TRUE
utr3distATG0	3971	0.103276	0.0113276	0	0.0126535	1.57106e-08	0.00927166	1972	0.187254	0.170299	0	1	3.50131e-51	1	5.96785e-82	Monotone	TRUE	TRUE	FALSE	TRUE	TRUE	TRUE	FALSE	TRUE
utr3distATG1	3971	0.10507	0.00935837	0	0.000772277	7.1318e-10	0.000290091	1864	0.19251	0.153516	0	1	1.91728e-52	1	1.92955e-69	Monotone	TRUE	TRUE	FALSE	TRUE	TRUE	TRUE	FALSE	TRUE
utr3distATG2	3971	0.0980702	0.00688248	0.000129032	0.0215161	3.11625e-05	0.0169719	1927	0.178596	0.152892	0	1	1.59703e-40	1	2.02898e-71	Monotone	TRUE	TRUE	FALSE	TRUE	TRUE	TRUE	FALSE	TRUE
utr3Lens	3971	0.0853512	0.000156497	0.318	0.309	0.338357	0.327314	3954	0.0852066	5.2383e-05	0.298	0.275	0.293925	0.276074	0.649132	MIC not significant	FALSE	FALSE	FALSE	FALSE	FALSE	FALSE	FALSE	FALSE
utr3uORFs	3971	0.0816731	0.000654087	0.714	0.758	0.720216	0.759846	1459	0.115372	0.00205388	0.434	0.51	0.440803	0.522165	0.0835453	MIC not significant	FALSE	FALSE	FALSE	FALSE	FALSE	FALSE	FALSE	FALSE
u3maxLenuORFs	3971	0.0816731	0.000729373	0.715	0.765	0.724849	0.771172	1459	0.108268	0.00118488	0.809	0.835	0.809535	0.827807	0.18882	MIC not significant	FALSE	FALSE	FALSE	FALSE	FALSE	FALSE	FALSE	FALSE
u3meanLenuORFs	3971	0.0816731	0.000792408	0.715	0.761	0.70271	0.75559	1459	0.119865	0.000730824	0.213	0.212	0.212679	0.215887	0.302115	MIC not significant	FALSE	FALSE	FALSE	FALSE	FALSE	FALSE	FALSE	FALSE
u3maxCostuORFs	3971	0.0816731	0.000788073	0.701	0.76	0.718186	0.767806	1459	0.107575	0.000760505	0.898	0.897	0.886262	0.888133	0.292496	MIC not significant	FALSE	FALSE	FALSE	FALSE	FALSE	FALSE	FALSE	FALSE
u3meanCostuORFs	3971	0.0816731	0.000888445	0.725	0.778	0.711527	0.768392	1459	0.116472	0.000267481	0.436	0.411	0.453833	0.427162	0.532489	MIC not significant	FALSE	FALSE	FALSE	FALSE	FALSE	FALSE	FALSE	FALSE
utr3uORFs0	3971	0.0823041	0.000243515	0.584	0.578	0.598199	0.599079	1261	0.126177	0.00228048	0.203	0.254	0.211018	0.270623	0.0900623	MIC not significant	FALSE	FALSE	FALSE	FALSE	FALSE	FALSE	FALSE	FALSE
utr3uORFs1	3971	0.0860432	8.94582e-05	0.18	0.173	0.18714	0.176853	1176	0.112771	0.00847338	0.838	0.985	0.851629	0.979758	0.00157745	MIC not significant	FALSE	FALSE	FALSE	FALSE	FALSE	FALSE	FALSE	FALSE
utr3uORFs2	3971	0.0801017	0.000167628	0.821	0.807	0.817234	0.809304	1262	0.107471	0.000957631	0.961	0.96	0.950067	0.952113	0.271984	MIC not significant	FALSE	FALSE	FALSE	FALSE	FALSE	FALSE	FALSE	FALSE
u3maxLenuORFs0	3971	0.0823041	0.000184259	0.584	0.572	0.593092	0.586983	1261	0.114615	0.000665814	0.788	0.777	0.786268	0.779141	0.359911	MIC not significant	FALSE	FALSE	FALSE	FALSE	FALSE	FALSE	FALSE	FALSE
u3maxLenuORFs1	3971	0.0860432	0.000109855	0.168	0.155	0.172461	0.162569	1176	0.122084	0.00454503	0.453	0.644	0.473429	0.657327	0.0207729	MIC not significant	FALSE	FALSE	FALSE	FALSE	FALSE	FALSE	FALSE	FALSE
u3maxLenuORFs2	3971	0.0801017	0.000151883	0.826	0.813	0.827803	0.81962	1262	0.11479	0.000487861	0.783	0.765	0.781208	0.77011	0.433057	MIC not significant	FALSE	FALSE	FALSE	FALSE	FALSE	FALSE	FALSE	FALSE
u3meanLenuORFs0	3971	0.0823041	0.000131859	0.595	0.579	0.602818	0.586227	1261	0.113559	7.94336e-05	0.829	0.801	0.826434	0.801912	0.751864	MIC not significant	FALSE	FALSE	FALSE	FALSE	FALSE	FALSE	FALSE	FALSE
u3meanLenuORFs1	3971	0.0860432	0.000157191	0.2	0.197	0.197462	0.188751	1176	0.124407	0.0023171	0.358	0.413	0.369239	0.440246	0.0989572	MIC not significant	FALSE	FALSE	FALSE	FALSE	FALSE	FALSE	FALSE	FALSE
u3meanLenuORFs2	3971	0.0801017	0.000132508	0.809	0.805	0.808217	0.79946	1262	0.1166	0.000234884	0.685	0.672	0.702422	0.677193	0.586482	MIC not significant	FALSE	FALSE	FALSE	FALSE	FALSE	FALSE	FALSE	FALSE
u3maxCostuORFs0	3971	0.0823041	0.000142155	0.574	0.566	0.570906	0.561359	1261	0.119134	0.000155577	0.595	0.564	0.623213	0.589183	0.658125	MIC not significant	FALSE	FALSE	FALSE	FALSE	FALSE	FALSE	FALSE	FALSE
u3maxCostuORFs1	3971	0.0860432	0.000123616	0.191	0.182	0.190196	0.179238	1176	0.122994	0.00376569	0.453	0.607	0.481615	0.628706	0.0353668	MIC not significant	FALSE	FALSE	FALSE	FALSE	FALSE	FALSE	FALSE	FALSE
u3maxCostuORFs2	3971	0.0801017	0.000131369	0.802	0.784	0.806106	0.79695	1262	0.116368	0.000226218	0.74	0.704	0.741826	0.714838	0.593472	MIC not significant	FALSE	FALSE	FALSE	FALSE	FALSE	FALSE	FALSE	FALSE
u3meanCostuORFs0	3971	0.0823041	9.92589e-05	0.553	0.541	0.583885	0.570035	1261	0.121159	1.09628e-05	0.463	0.421	0.504665	0.462406	0.906496	MIC not significant	FALSE	FALSE	FALSE	FALSE	FALSE	FALSE	FALSE	FALSE
u3meanCostuORFs1	3971	0.0860432	0.000174306	0.208	0.202	0.191233	0.185363	1176	0.124448	0.00174588	0.352	0.411	0.38991	0.438524	0.152149	MIC not significant	FALSE	FALSE	FALSE	FALSE	FALSE	FALSE	FALSE	FALSE
u3meanCostuORFs2	3971	0.0801017	0.000109697	0.798	0.785	0.806337	0.795871	1262	0.1203	4.68786e-05	0.536	0.506	0.558701	0.521363	0.808012	MIC not significant	FALSE	FALSE	FALSE	FALSE	FALSE	FALSE	FALSE	FALSE
rutr3bestATG	3933	0.102521	0.0154376	9.80392e-06	0.26701	7.74898e-09	0.27957	3932	0.102471	0.0152997	1.9802e-05	0.258743	8.06735e-09	0.269179	7.04719e-15	non-significant monotone/non-monotone	TRUE	TRUE	FALSE	FALSE	TRUE	TRUE	FALSE	FALSE
rutr3MeanATG	3933	0.0992685	0.0161494	8.91089e-05	0.767366	2.72591e-06	0.772526	3932	0.0992179	0.0160087	4.9505e-05	0.76198	2.99181e-06	0.766384	1.67408e-15	non-significant monotone/non-monotone	TRUE	TRUE	FALSE	FALSE	TRUE	TRUE	FALSE	FALSE
rutr3bestATG0	3933	0.0985217	0.0108675	0.000225806	0.200419	6.62693e-06	0.206536	3932	0.0984568	0.0107503	0.000118812	0.193762	6.67584e-06	0.200027	7.16998e-11	non-significant monotone/non-monotone	TRUE	TRUE	FALSE	FALSE	TRUE	TRUE	FALSE	FALSE
rutr3MeanATG0	3933	0.101538	0.011049	9.90099e-06	0.044198	3.01196e-08	0.0366899	3932	0.101474	0.010931	1.9802e-05	0.0430396	4.22608e-08	0.0366334	4.96791e-11	Non-monotone	TRUE	TRUE	FALSE	FALSE	TRUE	TRUE	FALSE	FALSE
rutr3bestATG1	3933	0.107901	0.0124688	0	0.00126733	3.28082e-14	0.000299818	3932	0.107674	0.0123189	0	0.00146535	5.96056e-14	0.000335238	2.97087e-12	Non-monotone	TRUE	TRUE	FALSE	FALSE	TRUE	TRUE	FALSE	FALSE
rutr3MeanATG1	3933	0.106646	0.0123598	0	0.00325743	5.50947e-13	0.0010722	3932	0.106418	0.0122105	0	0.00325743	9.39218e-13	0.00119138	3.70126e-12	Non-monotone	TRUE	TRUE	FALSE	FALSE	TRUE	TRUE	FALSE	FALSE
rutr3bestATG2	3933	0.095959	0.0160704	0.000903226	0.970032	0.000212479	0.960919	3932	0.0957292	0.0159034	0.001	0.976	0.000356538	0.960019	2.07253e-15	Monotone	TRUE	TRUE	FALSE	TRUE	TRUE	TRUE	FALSE	FALSE
rutr3MeanATG2	3933	0.0980244	0.0162106	6.45161e-05	0.871355	1.26852e-05	0.867898	3932	0.0977951	0.016043	0.000227723	0.879802	1.9003e-05	0.874221	1.5618e-15	non-significant monotone/non-monotone	TRUE	TRUE	FALSE	FALSE	TRUE	TRUE	FALSE	FALSE
utr3_PARS_numBP_all	2430	0.107288	0.00976121	0.026	0.45	0.0206981	0.462473	2005	0.107317	0.00459435	0.237	0.504	0.240931	0.532772	0.00239203	MIC not significant	FALSE	FALSE	FALSE	FALSE	TRUE	FALSE	FALSE	FALSE
utr5MeanPARS	2435	0.144691	0.00322029	0	0	1.91642e-27	2.05127e-24	2435	0.144691	0.00322029	0	0	2.20334e-27	2.57575e-24	0.00509334	Non-monotone	TRUE	TRUE	TRUE	FALSE	TRUE	TRUE	TRUE	FALSE
orfMeanPARS	2435	0.272744	0.27358	0	1	0	1	2435	0.272744	0.27358	0	1	0	1	0	Monotone	TRUE	TRUE	FALSE	TRUE	TRUE	TRUE	FALSE	TRUE
utr3MeanPARS	2430	0.138522	0.00467284	0	0	1.12166e-20	8.62098e-17	2430	0.138522	0.00467284	0	0	7.13173e-21	6.3504e-17	0.000746432	Non-monotone	TRUE	TRUE	TRUE	FALSE	TRUE	TRUE	TRUE	FALSE
seqMeanPARS	2435	0.236311	0.216515	0	1	2.50213e-237	1	2435	0.236311	0.216515	0	1	4.43861e-234	1	0	Monotone	TRUE	TRUE	FALSE	TRUE	TRUE	TRUE	FALSE	TRUE
wutr5MeanPARS	2435	0.197812	0.178761	0	1	5.2507e-123	1	2435	0.197812	0.178761	0	1	4.08144e-123	1	3.42071e-106	Monotone	TRUE	TRUE	FALSE	TRUE	TRUE	TRUE	FALSE	TRUE
worfMeanPARS	2435	0.412841	0.516305	0	1	0	1	2435	0.412841	0.516305	0	1	0	1	0	Monotone	TRUE	TRUE	FALSE	TRUE	TRUE	TRUE	FALSE	TRUE
wutr3MeanPARS	2430	0.200629	0.172616	0	1	1.67453e-129	1	2430	0.200629	0.172616	0	1	3.0134e-129	1	4.85348e-102	Monotone	TRUE	TRUE	FALSE	TRUE	TRUE	TRUE	FALSE	TRUE
wseqMeanPARS	2435	0.399078	0.497271	0	1	0	1	2435	0.399078	0.497271	0	1	0	1	0	Monotone	TRUE	TRUE	FALSE	TRUE	TRUE	TRUE	FALSE	TRUE
pars40	2435	0.186356	0.0594831	0	0	3.20862e-97	1.3585e-11	2435	0.186356	0.0594831	0	0	2.76785e-96	1.66652e-11	2.62614e-34	Non-monotone	TRUE	TRUE	TRUE	FALSE	TRUE	TRUE	TRUE	FALSE
u540pars	2435	0.130421	8.55372e-05	0	0	7.25251e-14	3.80166e-14	2435	0.130421	8.55372e-05	0	0	7.22887e-14	4.02849e-14	0.648278	Non-monotone	TRUE	TRUE	TRUE	FALSE	TRUE	TRUE	TRUE	FALSE
u540pars40	2435	0.155545	0.0453393	0	0.00979412	2.10087e-41	0.00505638	2435	0.155545	0.0453393	0	0.0103168	6.72542e-41	0.00537577	2.30825e-26	Non-monotone	TRUE	TRUE	FALSE	FALSE	TRUE	TRUE	FALSE	FALSE
u5pars40	2435	0.156659	0.0574041	0	0.52049	1.55767e-42	0.541347	2435	0.156659	0.0574041	0	0.523178	1.24505e-42	0.541759	3.92207e-33	non-significant monotone/non-monotone	TRUE	TRUE	FALSE	FALSE	TRUE	TRUE	FALSE	FALSE
u5parsOrf	2435	0.26004	0.258965	0	1	0	1	2435	0.26004	0.258965	0	1	0	1	0	Monotone	TRUE	TRUE	FALSE	TRUE	TRUE	TRUE	FALSE	TRUE
wpars40	2435	0.252025	0.274098	0	1	1.95606e-292	1	2435	0.252025	0.274098	0	1	5.77343e-293	1	1.76813e-171	Monotone	TRUE	TRUE	FALSE	TRUE	TRUE	TRUE	FALSE	TRUE
wu540pars	2435	0.171109	0.135216	0	1	5.16406e-66	1	2435	0.171109	0.135216	0	1	8.5957e-66	1	7.76405e-79	Monotone	TRUE	TRUE	FALSE	TRUE	TRUE	TRUE	FALSE	TRUE
wu540pars40	2435	0.292313	0.319519	0	1	0	1	2435	0.292313	0.319519	0	1	0	1	1.19371e-205	Monotone	TRUE	TRUE	FALSE	TRUE	TRUE	TRUE	FALSE	TRUE
wu5pars40	2435	0.292345	0.338398	0	1	0	1	2435	0.292345	0.338398	0	1	0	1	0	Monotone	TRUE	TRUE	FALSE	TRUE	TRUE	TRUE	FALSE	TRUE
wu5parsOrf	2435	0.415938	0.515622	0	1	0	1	2435	0.415938	0.515622	0	1	0	1	0	Monotone	TRUE	TRUE	FALSE	TRUE	TRUE	TRUE	FALSE	TRUE
r5utrOrf	3971	0.0973135	0.0255808	0.001	1	5.17341e-05	0.999995	3971	0.0973135	0.0255808	0.000287129	1	3.70173e-05	0.999996	3.63636e-24	Monotone	TRUE	TRUE	FALSE	TRUE	TRUE	TRUE	FALSE	TRUE
r3utrOrf	3971	0.135992	0.0820457	0	1	1.43779e-64	1	3954	0.134615	0.0804818	0	1	3.50655e-62	1	4.41206e-74	Monotone	TRUE	TRUE	FALSE	TRUE	TRUE	TRUE	FALSE	TRUE
r5utr3utr	3954	0.0932591	0.0132178	0.006	0.878	0.00155267	0.869986	3954	0.0932591	0.0132178	0.006	0.879	0.00185549	0.873356	3.68458e-13	non-significant monotone/non-monotone	TRUE	TRUE	FALSE	FALSE	TRUE	TRUE	FALSE	FALSE
allLens	3971	0.175463	0.173661	0	1	1.00236e-157	1	3971	0.175463	0.173661	0	1	1.64054e-156	1	1.20863e-166	Monotone	TRUE	TRUE	FALSE	TRUE	TRUE	TRUE	FALSE	TRUE
all_PARS_numBP_all	2435	0.0982134	2.778e-05	0.606	0.574	0.632078	0.595657	2435	0.0982134	2.778e-05	0.59	0.553	0.611061	0.573593	0.7949	MIC not significant	FALSE	FALSE	FALSE	FALSE	FALSE	FALSE	FALSE	FALSE
allgc	3971	0.0930414	0.00788556	0.009	0.511	0.00627734	0.528933	3971	0.0930414	0.00788556	0.01	0.532	0.00646198	0.548824	2.08056e-08	non-significant monotone/non-monotone	TRUE	TRUE	FALSE	FALSE	TRUE	TRUE	FALSE	FALSE
utr540orf40gc	3971	0.086795	0.00312475	0.207	0.499	0.217297	0.511105	3971	0.086795	0.00312475	0.211	0.5	0.214642	0.507262	0.00042476	MIC not significant	FALSE	FALSE	FALSE	FALSE	FALSE	FALSE	FALSE	FALSE
utr5orf40gc	3971	0.0862083	0.000772758	0.256	0.319	0.279865	0.329174	3971	0.0862083	0.000772758	0.267	0.31	0.268354	0.319701	0.0798538	MIC not significant	FALSE	FALSE	FALSE	FALSE	FALSE	FALSE	FALSE	FALSE
utr5orfgc	3971	0.108445	0.0419561	0	1	1.2164e-14	1	3971	0.108445	0.0419561	0	1	1.44399e-14	1	7.04722e-39	Monotone	TRUE	TRUE	FALSE	TRUE	TRUE	TRUE	FALSE	TRUE
orf40utr340gc	3971	0.0844792	5.44397e-05	0.435	0.412	0.438629	0.41469	3971	0.0844792	5.44397e-05	0.435	0.418	0.453348	0.432757	0.642066	MIC not significant	FALSE	FALSE	FALSE	FALSE	FALSE	FALSE	FALSE	FALSE
orf40utr3gc	3971	0.0932455	0.00790266	0.003	0.291	0.00223354	0.310761	3971	0.0932455	0.00790266	0.006	0.321	0.00401313	0.326138	2.00852e-08	non-significant monotone/non-monotone	TRUE	TRUE	FALSE	FALSE	TRUE	TRUE	FALSE	FALSE
orfutr3gc	3971	0.0924351	0.0127823	0.015	0.976	0.0133802	0.975424	3971	0.0924351	0.0127823	0.015	0.973	0.0142191	0.969325	8.98822e-13	Monotone	TRUE	TRUE	FALSE	TRUE	TRUE	TRUE	FALSE	TRUE
allmeanFE	3971	0.126632	0.0704469	0	1	1.82718e-42	1	3971	0.126632	0.0704469	0	1	1.53789e-42	1	5.21667e-65	Monotone	TRUE	TRUE	FALSE	TRUE	TRUE	TRUE	FALSE	TRUE
utr540orf40FE	3971	0.0852002	0.00317992	0.332	0.676	0.354527	0.685501	3971	0.0852002	0.00317992	0.378	0.688	0.382752	0.705515	0.000377659	MIC not significant	FALSE	FALSE	FALSE	FALSE	FALSE	FALSE	FALSE	FALSE
utr5orf40FE	3971	0.0868022	0.00208867	0.275	0.518	0.294042	0.533714	3971	0.0868022	0.00208867	0.259	0.521	0.298443	0.53118	0.00396988	MIC not significant	FALSE	FALSE	FALSE	FALSE	FALSE	FALSE	FALSE	FALSE
utr5orfFE	3971	0.142349	0.0970487	0	1	7.22377e-80	1	3971	0.142349	0.0970487	0	1	5.71487e-80	1	4.20652e-90	Monotone	TRUE	TRUE	FALSE	TRUE	TRUE	TRUE	FALSE	TRUE
utr530Corf30CbestATG	3971	0.0921539	0.0126953	0.017	0.945	0.0106628	0.93594	3150	0.0989799	0.0073967	0.028	0.43	0.0149578	0.455279	1.33811e-06	non-significant monotone/non-monotone	TRUE	TRUE	FALSE	FALSE	TRUE	TRUE	FALSE	FALSE
utr530Corf30CmeanATG	3971	0.0921403	0.0111964	0.007	0.889	0.00648996	0.88458	3150	0.0994596	0.00564193	0.022	0.261	0.0140787	0.277815	2.44321e-05	non-significant monotone/non-monotone	TRUE	TRUE	FALSE	FALSE	TRUE	TRUE	FALSE	FALSE
utr530Corf30CbestATG0	3971	0.0868783	0.0022723	0.126	0.263	0.119914	0.275704	1172	0.138746	0.00147932	0.04	0.045	0.0294357	0.0356026	0.18824	MIC not significant	FALSE	FALSE	FALSE	FALSE	FALSE	TRUE	FALSE	FALSE
utr530Corf30CmeanATG0	3971	0.0868783	0.00222904	0.131	0.295	0.13401	0.293901	1172	0.140155	0.00116172	0.029	0.025	0.0198005	0.0219947	0.243638	MIC not significant	FALSE	TRUE	FALSE	FALSE	FALSE	TRUE	FALSE	FALSE
utr530Corf30CbestATG1	3971	0.0891534	0.00584373	0.09	0.529	0.0690279	0.564581	2447	0.101799	0.00255093	0.238	0.439	0.259517	0.448212	0.0124635	MIC not significant	FALSE	FALSE	FALSE	FALSE	FALSE	FALSE	FALSE	FALSE
utr530Corf30CmeanATG1	3971	0.0855226	0.00548174	0.311	0.873	0.318627	0.868549	2447	0.0954788	0.00197269	0.835	0.908	0.825934	0.903809	0.0280173	MIC not significant	FALSE	FALSE	FALSE	FALSE	FALSE	FALSE	FALSE	FALSE
utr530Corf30CbestATG2	3971	0.0877466	0.00663415	0.046	0.532	0.0427973	0.552637	857	0.130618	0.00198803	0.845	0.874	0.828176	0.85501	0.192228	MIC not significant	FALSE	FALSE	FALSE	FALSE	FALSE	FALSE	FALSE	FALSE
utr530Corf30CmeanATG2	3971	0.0877466	0.00657024	0.046	0.495	0.0365259	0.520299	857	0.131941	0.0014628	0.794	0.812	0.800267	0.81198	0.263385	MIC not significant	FALSE	FALSE	FALSE	FALSE	FALSE	FALSE	FALSE	FALSE
utr330Corf30CbestATG	3971	0.0841548	0.00160926	0.57	0.749	0.589678	0.741123	3392	0.0907973	0.000764491	0.325	0.37	0.329086	0.382127	0.107389	MIC not significant	FALSE	FALSE	FALSE	FALSE	FALSE	FALSE	FALSE	FALSE
utr330Corf30CmeanATG	3971	0.0842326	0.00152306	0.581	0.727	0.600902	0.74957	3392	0.091758	0.000685187	0.278	0.313	0.297922	0.340617	0.127455	MIC not significant	FALSE	FALSE	FALSE	FALSE	FALSE	FALSE	FALSE	FALSE
utr330Corf30CbestATG0	3971	0.0807519	0.000105546	0.802	0.792	0.80595	0.796238	1675	0.110379	0.000254846	0.56	0.539	0.584542	0.555222	0.513818	MIC not significant	FALSE	FALSE	FALSE	FALSE	FALSE	FALSE	FALSE	FALSE
utr330Corf30CmeanATG0	3971	0.0807519	9.46646e-05	0.809	0.8	0.817574	0.805796	1675	0.114145	0.000351577	0.328	0.315	0.349563	0.332032	0.443148	MIC not significant	FALSE	FALSE	FALSE	FALSE	FALSE	FALSE	FALSE	FALSE
utr330Corf30CbestATG1	3971	0.0802607	0.000409897	0.88	0.895	0.878763	0.888732	2503	0.0954701	0.00297656	0.775	0.944	0.784123	0.921273	0.0063296	MIC not significant	FALSE	FALSE	FALSE	FALSE	FALSE	FALSE	FALSE	FALSE
utr330Corf30CmeanATG1	3971	0.079102	0.000380764	0.951	0.956	0.936651	0.941991	2503	0.0937946	0.0027777	0.912	0.976	0.910592	0.975122	0.00835712	MIC not significant	FALSE	FALSE	FALSE	FALSE	FALSE	FALSE	FALSE	FALSE
utr330Corf30CbestATG2	3971	0.0868429	0.00117018	0.12	0.173	0.112978	0.170727	1064	0.121471	9.81332e-05	0.868	0.838	0.859553	0.835666	0.746878	MIC not significant	FALSE	FALSE	FALSE	FALSE	FALSE	FALSE	FALSE	FALSE
utr330Corf30CmeanATG2	3971	0.0868429	0.00116644	0.123	0.17	0.11661	0.178714	1064	0.121257	8.809e-05	0.875	0.846	0.870567	0.845849	0.759759	MIC not significant	FALSE	FALSE	FALSE	FALSE	FALSE	FALSE	FALSE	FALSE
rutr530Corf30CbestATG	3933	0.113112	0.0408983	0	1	1.61758e-20	0.999995	3931	0.113005	0.040495	0	1	2.64318e-20	0.999992	3.39053e-37	Monotone	TRUE	TRUE	FALSE	TRUE	TRUE	TRUE	FALSE	TRUE
rutr530Corf30CmeanATG	3933	0.112073	0.0398666	0	1	4.90302e-19	0.999995	3931	0.112114	0.0394674	0	1	4.72229e-19	0.99999	2.81239e-36	Monotone	TRUE	TRUE	FALSE	TRUE	TRUE	TRUE	FALSE	TRUE
rutr530Corf30CbestATG0	3933	0.103907	0.033448	0	1	2.24561e-10	0.999999	3932	0.10355	0.0332216	0	1	5.19503e-10	0.999999	1.01926e-30	Monotone	TRUE	TRUE	FALSE	TRUE	TRUE	TRUE	FALSE	TRUE
rutr530Corf30CmeanATG0	3933	0.103907	0.0334521	0	1	2.07506e-10	0.999999	3932	0.10355	0.0332257	0	1	5.94219e-10	0.999999	1.0108e-30	Monotone	TRUE	TRUE	FALSE	TRUE	TRUE	TRUE	FALSE	TRUE
rutr530Corf30CbestATG1	3933	0.102481	0.0287609	0	0.99999	6.58248e-09	0.999943	3930	0.101895	0.0283017	0	1	2.45283e-08	0.999955	2.4375e-26	Monotone	TRUE	TRUE	FALSE	TRUE	TRUE	TRUE	FALSE	TRUE
rutr530Corf30CmeanATG1	3933	0.102658	0.028726	3.22581e-05	1	4.94797e-09	0.999923	3930	0.102036	0.0282672	0	1	1.87898e-08	0.999943	2.61519e-26	Monotone	TRUE	TRUE	FALSE	TRUE	TRUE	TRUE	FALSE	TRUE
rutr530Corf30CbestATG2	3933	0.116436	0.0455789	0	1	9.29694e-26	0.999998	3932	0.116167	0.0453257	0	1	3.11826e-25	0.999998	1.54813e-41	Monotone	TRUE	TRUE	FALSE	TRUE	TRUE	TRUE	FALSE	TRUE
rutr530Corf30CmeanATG2	3933	0.116436	0.0455199	0	1	1.82855e-25	0.999998	3932	0.116167	0.0452668	0	1	4.01101e-25	0.999998	1.7487e-41	Monotone	TRUE	TRUE	FALSE	TRUE	TRUE	TRUE	FALSE	TRUE
rutr330Corf30CbestATG	3933	0.105362	0.026874	0	0.994267	1.95644e-11	0.989384	3932	0.105138	0.026768	0	0.995089	4.00141e-11	0.990514	5.39767e-25	Monotone	TRUE	TRUE	FALSE	TRUE	TRUE	TRUE	FALSE	TRUE
rutr330Corf30CmeanATG	3933	0.104726	0.0277541	0	0.999307	9.89458e-11	0.997526	3932	0.105405	0.0276467	0	0.997713	1.63561e-11	0.994834	9.00331e-26	Monotone	TRUE	TRUE	FALSE	TRUE	TRUE	TRUE	FALSE	TRUE
rutr330Corf30CbestATG0	3933	0.0946889	0.0154121	0.005	0.978	0.00102819	0.974245	3931	0.0946127	0.015163	0.002	0.979	0.000482976	0.972417	9.37051e-15	Monotone	TRUE	TRUE	FALSE	TRUE	TRUE	TRUE	FALSE	TRUE
rutr330Corf30CmeanATG0	3933	0.0927667	0.0154767	0.011	0.996	0.00610126	0.995944	3931	0.0927293	0.0152271	0.011	0.998	0.0078175	0.995575	8.22869e-15	Monotone	TRUE	TRUE	FALSE	TRUE	TRUE	TRUE	FALSE	TRUE
rutr330Corf30CbestATG1	3933	0.0950081	0.0138491	0.003	0.916	0.000889106	0.908564	3932	0.0948148	0.0136927	0.002	0.939	0.000767564	0.922303	1.83212e-13	non-significant monotone/non-monotone	TRUE	TRUE	FALSE	FALSE	TRUE	TRUE	FALSE	FALSE
rutr330Corf30CmeanATG1	3933	0.0955628	0.0141012	0.002	0.913	0.000248296	0.895705	3932	0.0953695	0.0139436	0.001	0.924	0.00038275	0.914905	1.10163e-13	non-significant monotone/non-monotone	TRUE	TRUE	FALSE	FALSE	TRUE	TRUE	FALSE	FALSE
rutr330Corf30CbestATG2	3933	0.109281	0.0286105	0	0.929891	4.48896e-16	0.92117	3932	0.109278	0.0283979	0	0.919337	5.2251e-16	0.911414	1.94606e-26	non-significant monotone/non-monotone	TRUE	TRUE	FALSE	FALSE	TRUE	TRUE	FALSE	FALSE
rutr330Corf30CmeanATG2	3933	0.109281	0.0286551	0	0.931921	3.9892e-16	0.923184	3932	0.109278	0.0284423	0	0.921921	4.43135e-16	0.913738	1.77746e-26	non-significant monotone/non-monotone	TRUE	TRUE	FALSE	FALSE	TRUE	TRUE	FALSE	FALSE
utr530Corf30CnumATGs	3971	0.0916217	0.0153262	0.018	0.986	0.015894	0.98116	3150	0.0929667	0.0108161	0.205	0.962	0.206689	0.955791	4.89899e-09	MIC not significant	TRUE	FALSE	FALSE	FALSE	TRUE	FALSE	FALSE	FALSE
utr530Corf30CnumATGs0	3971	0.0868783	0.00208346	0.112	0.255	0.11866	0.259074	1172	0.129787	0.000475144	0.073	0.068	0.08021	0.0720334	0.455952	MIC not significant	FALSE	FALSE	FALSE	FALSE	FALSE	FALSE	FALSE	FALSE
utr530Corf30CnumATGs1	3971	0.0909259	0.00697898	0.027	0.425	0.0177591	0.443733	2447	0.0917715	0.00501835	0.866	0.985	0.857758	0.979905	0.000453388	MIC not significant	FALSE	FALSE	FALSE	FALSE	TRUE	FALSE	FALSE	FALSE
utr530Corf30CnumATGs2	3971	0.0877466	0.00677063	0.044	0.524	0.0422345	0.556839	857	0.127077	0.00626649	0.501	0.714	0.521305	0.718558	0.0204676	MIC not significant	FALSE	FALSE	FALSE	FALSE	FALSE	FALSE	FALSE	FALSE
utr330Corf30CnumATGs	3971	0.0818808	0.00177082	0.722	0.848	0.726452	0.848542	3392	0.0846435	0.00090825	0.769	0.825	0.764412	0.813697	0.0792648	MIC not significant	FALSE	FALSE	FALSE	FALSE	FALSE	FALSE	FALSE	FALSE
utr330Corf30CnumATGs0	3971	0.0807519	0.000379645	0.809	0.825	0.81218	0.822366	1675	0.10557	0.00141851	0.583	0.637	0.591899	0.642246	0.123359	MIC not significant	FALSE	FALSE	FALSE	FALSE	FALSE	FALSE	FALSE	FALSE
utr330Corf30CnumATGs1	3971	0.0799254	0.000387403	0.882	0.889	0.875239	0.88261	2503	0.103396	0.0033709	0.091	0.238	0.0884864	0.234379	0.00366416	MIC not significant	FALSE	FALSE	FALSE	FALSE	FALSE	FALSE	FALSE	FALSE
utr330Corf30CnumATGs2	3971	0.0868429	0.00119864	0.121	0.183	0.114311	0.173528	1064	0.119488	0.000339491	0.417	0.4	0.436312	0.40801	0.548267	MIC not significant	FALSE	FALSE	FALSE	FALSE	FALSE	FALSE	FALSE	FALSE
utr5uORFsBio	3971	0.106506	0.0302155	0	0.909802	6.40207e-14	0.906199	720	0.153974	3.64264e-05	0.085	0.062	0.0749987	0.0569593	0.871568	MIC not significant	TRUE	FALSE	FALSE	FALSE	TRUE	FALSE	FALSE	FALSE
u5maxLenuORFsBio	3971	0.106506	0.0301566	0	0.905921	7.61972e-14	0.901503	720	0.122562	7.63023e-05	0.952	0.933	0.938339	0.923282	0.814997	MIC not significant	TRUE	FALSE	FALSE	FALSE	TRUE	FALSE	FALSE	FALSE
u5meanLenuORFsBio	3971	0.106506	0.0304831	0	0.924832	6.34321e-14	0.919516	720	0.127557	0.000586762	0.875	0.857	0.85617	0.838568	0.516376	MIC not significant	TRUE	FALSE	FALSE	FALSE	TRUE	FALSE	FALSE	FALSE
u5maxCostuORFsBio	3971	0.106506	0.0302484	0	0.911119	7.78478e-14	0.906479	720	0.124231	0.000265488	0.987	0.977	0.969114	0.96075	0.66249	MIC not significant	TRUE	FALSE	FALSE	FALSE	TRUE	FALSE	FALSE	FALSE
u5meanCostuORFsBio	3971	0.106506	0.0305972	0	0.926317	7.79107e-14	0.922095	720	0.132118	0.00105676	0.877	0.875	0.871464	0.865237	0.383759	MIC not significant	TRUE	FALSE	FALSE	FALSE	TRUE	FALSE	FALSE	FALSE
utr5uORFs30CBio	3971	0.101847	0.0261143	0	0.865574	6.80156e-11	0.863907	532	0.140232	0.00570358	0.748	0.841	0.752992	0.833504	0.0818037	MIC not significant	TRUE	FALSE	FALSE	FALSE	TRUE	FALSE	FALSE	FALSE
u5maxLenuORFs30CBio	3971	0.101847	0.0260787	0	0.860851	8.82822e-11	0.859941	532	0.146481	0.00461105	0.678	0.766	0.699895	0.77306	0.117735	MIC not significant	TRUE	FALSE	FALSE	FALSE	TRUE	FALSE	FALSE	FALSE
u5meanLenuORFs30CBio	3971	0.101847	0.0261312	0	0.863851	7.77281e-11	0.862528	532	0.145826	0.00540039	0.692	0.798	0.714059	0.801594	0.0903988	MIC not significant	TRUE	FALSE	FALSE	FALSE	TRUE	FALSE	FALSE	FALSE
u5maxCostuORFs30CBio	3971	0.101847	0.0261071	0	0.864535	7.15704e-11	0.862371	532	0.142721	0.0051508	0.905	0.95	0.891854	0.934457	0.0982085	MIC not significant	TRUE	FALSE	FALSE	FALSE	TRUE	FALSE	FALSE	FALSE
u5meanCostuORFs30CBio	3971	0.101847	0.0261611	0	0.868287	7.03862e-11	0.866588	532	0.146672	0.00599516	0.812	0.907	0.812404	0.890099	0.0743628	MIC not significant	TRUE	FALSE	FALSE	FALSE	TRUE	FALSE	FALSE	FALSE
utr5uORFs0Bio	3971	0.0761255	0.00516377	0.558	0.963	0.586215	0.950526	294	0.217478	0.000754377	0.037	0.029	0.0266849	0.0180857	0.639052	MIC not significant	FALSE	FALSE	FALSE	FALSE	FALSE	TRUE	FALSE	FALSE
utr5uORFs1Bio	3971	0.0902139	0.0161906	0.000322581	0.87729	0.000156953	0.875962	375	0.195888	0.0101352	0.036	0.081	0.0265045	0.0682713	0.0514171	non-significant monotone/non-monotone	TRUE	FALSE	FALSE	FALSE	TRUE	TRUE	FALSE	FALSE
utr5uORFs2Bio	3971	0.0908169	0.0143863	6.45161e-05	0.627871	4.53646e-05	0.638352	354	0.192809	1.36616e-05	0.071	0.049	0.0524231	0.0350619	0.944753	MIC not significant	TRUE	FALSE	FALSE	FALSE	TRUE	FALSE	FALSE	FALSE
u5maxLenuORFs0Bio	3971	0.0761255	0.00513136	0.601	0.969	0.608149	0.96181	294	0.211476	6.14536e-05	0.096	0.072	0.097784	0.0726467	0.893526	MIC not significant	FALSE	FALSE	FALSE	FALSE	FALSE	FALSE	FALSE	FALSE
u5maxLenuORFs1Bio	3971	0.0902139	0.0167206	0.001	0.907	0.000155859	0.905239	375	0.17867	0.00227295	0.279	0.27	0.292248	0.279633	0.357221	MIC not significant	TRUE	FALSE	FALSE	FALSE	TRUE	FALSE	FALSE	FALSE
u5maxLenuORFs2Bio	3971	0.0908169	0.0143321	9.67742e-05	0.620806	5.12705e-05	0.63008	354	0.162205	0.000521708	0.639	0.582	0.642665	0.592198	0.668443	MIC not significant	TRUE	FALSE	FALSE	FALSE	TRUE	FALSE	FALSE	FALSE
u5meanLenuORFs0Bio	3971	0.0761255	0.00513344	0.617	0.961	0.619114	0.959196	294	0.200473	4.87643e-05	0.224	0.174	0.229485	0.182185	0.905095	MIC not significant	FALSE	FALSE	FALSE	FALSE	FALSE	FALSE	FALSE	FALSE
u5meanLenuORFs1Bio	3971	0.0902139	0.0168313	0.001	0.918	0.000286889	0.905115	375	0.188787	0.00465905	0.137	0.154	0.13198	0.15326	0.187195	MIC not significant	TRUE	FALSE	FALSE	FALSE	TRUE	FALSE	FALSE	FALSE
u5meanLenuORFs2Bio	3971	0.0908169	0.0143419	0.000129032	0.619419	5.38178e-05	0.631438	354	0.155865	0.00077857	0.761	0.72	0.756378	0.722027	0.600811	MIC not significant	TRUE	FALSE	FALSE	FALSE	TRUE	FALSE	FALSE	FALSE
u5maxCostuORFs0Bio	3971	0.0761255	0.00515121	0.571	0.963	0.585619	0.960125	294	0.175481	0.000336763	0.842	0.775	0.830128	0.783171	0.754021	MIC not significant	FALSE	FALSE	FALSE	FALSE	FALSE	FALSE	FALSE	FALSE
u5maxCostuORFs1Bio	3971	0.0902139	0.0167828	0.001	0.927	7.08748e-05	0.915781	375	0.177287	0.00420325	0.414	0.465	0.45222	0.492528	0.21035	MIC not significant	TRUE	FALSE	FALSE	FALSE	TRUE	FALSE	FALSE	FALSE
u5maxCostuORFs2Bio	3971	0.0908169	0.014381	0.000258065	0.627194	5.42753e-05	0.63667	354	0.161987	4.30491e-05	0.798	0.735	0.793078	0.736723	0.902097	MIC not significant	TRUE	FALSE	FALSE	FALSE	TRUE	FALSE	FALSE	FALSE
u5meanCostuORFs0Bio	3971	0.0761255	0.00515355	0.601	0.958	0.60174	0.962567	294	0.177249	0.000328564	0.81	0.749	0.806534	0.758533	0.756939	MIC not significant	FALSE	FALSE	FALSE	FALSE	FALSE	FALSE	FALSE	FALSE
u5meanCostuORFs1Bio	3971	0.0902139	0.0168922	0.001	0.904	0.000180131	0.904706	375	0.1642	0.00716555	0.785	0.881	0.788538	0.867216	0.101693	MIC not significant	TRUE	FALSE	FALSE	FALSE	TRUE	FALSE	FALSE	FALSE
u5meanCostuORFs2Bio	3971	0.0908169	0.0143807	9.67742e-05	0.629	5.56868e-05	0.639003	354	0.172852	0.00023522	0.567	0.501	0.592174	0.524741	0.773685	MIC not significant	TRUE	FALSE	FALSE	FALSE	TRUE	FALSE	FALSE	FALSE
utr5uORFs030CBio	3971	0.0798472	0.00417646	0.052	0.32	0.0438488	0.341505	148	0.174437	0.0149419	0.889	0.95	0.880943	0.933554	0.138866	MIC not significant	FALSE	FALSE	FALSE	FALSE	FALSE	FALSE	FALSE	FALSE
utr5uORFs130CBio	3971	0.0908819	0.0127235	1.9802e-05	0.243139	3.72648e-06	0.248966	246	0.162736	0.00109545	0.692	0.637	0.707835	0.659401	0.605426	MIC not significant	TRUE	FALSE	FALSE	FALSE	TRUE	FALSE	FALSE	FALSE
utr5uORFs230CBio	3971	0.0925846	0.0131749	0	0.128386	1.58741e-07	0.126374	234	0.169069	0.0085305	0.664	0.753	0.676292	0.759707	0.159044	MIC not significant	TRUE	FALSE	FALSE	FALSE	TRUE	FALSE	FALSE	FALSE
u5maxLenuORFs030CBio	3971	0.0798472	0.00415439	0.046	0.329	0.0414736	0.335232	148	0.303815	0.00386972	0.006	0.006	0.0020251	0.00152829	0.452597	Non-monotone	FALSE	TRUE	FALSE	FALSE	FALSE	TRUE	FALSE	FALSE
u5maxLenuORFs130CBio	3971	0.0908819	0.0129834	2.94118e-05	0.265382	3.29248e-06	0.270142	246	0.205512	0.0202415	0.188	0.433	0.19492	0.466568	0.0256507	MIC not significant	TRUE	FALSE	FALSE	FALSE	TRUE	FALSE	FALSE	FALSE
u5maxLenuORFs230CBio	3971	0.0925846	0.0131486	1.9802e-05	0.127416	1.79979e-07	0.126516	234	0.187589	0.00145669	0.599	0.543	0.6251	0.571049	0.561292	MIC not significant	TRUE	FALSE	FALSE	FALSE	TRUE	FALSE	FALSE	FALSE
u5meanLenuORFs030CBio	3971	0.0798472	0.00414959	0.048	0.327	0.0404396	0.332357	148	0.303284	0.00292837	0.008	0.008	0.0028476	0.00236307	0.51361	Non-monotone	FALSE	TRUE	FALSE	FALSE	FALSE	TRUE	FALSE	FALSE
u5meanLenuORFs130CBio	3971	0.0908819	0.0130288	9.67742e-05	0.269839	3.53834e-06	0.275175	246	0.211062	0.0279289	0.118	0.492	0.125275	0.500272	0.00863164	MIC not significant	TRUE	FALSE	FALSE	FALSE	TRUE	FALSE	FALSE	FALSE
u5meanLenuORFs230CBio	3971	0.0925846	0.0131287	9.90099e-06	0.126168	1.61438e-07	0.124486	234	0.200471	0.000676511	0.38	0.325	0.414561	0.353401	0.692245	MIC not significant	TRUE	FALSE	FALSE	FALSE	TRUE	FALSE	FALSE	FALSE
u5maxCostuORFs030CBio	3971	0.0798472	0.00416211	0.05	0.317	0.041094	0.333468	148	0.288525	0.00586847	0.036	0.028	0.0253813	0.0230285	0.354753	MIC not significant	FALSE	FALSE	FALSE	FALSE	FALSE	TRUE	FALSE	FALSE
u5maxCostuORFs130CBio	3971	0.0908819	0.0129943	6.45161e-05	0.271226	3.80843e-06	0.276119	246	0.183183	0.0220447	0.738	0.966	0.745514	0.941945	0.0198168	MIC not significant	TRUE	FALSE	FALSE	FALSE	TRUE	FALSE	FALSE	FALSE
u5maxCostuORFs230CBio	3971	0.0925846	0.0131578	9.80392e-06	0.127873	1.66328e-07	0.126754	234	0.215845	0.00200546	0.291	0.261	0.319096	0.279969	0.495421	MIC not significant	TRUE	FALSE	FALSE	FALSE	TRUE	FALSE	FALSE	FALSE
u5meanCostuORFs030CBio	3971	0.0798472	0.0041587	0.045	0.308	0.0365383	0.317096	148	0.278413	0.00511051	0.055	0.053	0.0449894	0.0365373	0.387908	MIC not significant	FALSE	FALSE	FALSE	FALSE	FALSE	FALSE	FALSE	FALSE
u5meanCostuORFs130CBio	3971	0.0908819	0.0130379	6.45161e-05	0.270613	3.65859e-06	0.278733	246	0.182206	0.0296218	0.743	0.995	0.742906	0.973714	0.00681171	MIC not significant	TRUE	FALSE	FALSE	FALSE	TRUE	FALSE	FALSE	FALSE
u5meanCostuORFs230CBio	3971	0.0925846	0.0131371	9.90099e-06	0.127198	1.81906e-07	0.125382	234	0.213774	0.00103592	0.29	0.246	0.344505	0.291598	0.624249	MIC not significant	TRUE	FALSE	FALSE	FALSE	TRUE	FALSE	FALSE	FALSE
orfuORFsBio	3971	0.157453	0.110057	0	1	2.98449e-99	1	3694	0.174436	0.160426	0	1	2.33372e-128	1	2.12664e-142	Monotone	TRUE	TRUE	FALSE	TRUE	TRUE	TRUE	FALSE	TRUE
orfmaxLenuORFsBio	3971	0.149685	0.108753	0	1	1.01465e-79	1	3694	0.172804	0.158523	0	1	3.00171e-124	1	1.39736e-140	Monotone	TRUE	TRUE	FALSE	TRUE	TRUE	TRUE	FALSE	TRUE
orfmeanLenuORFsBio	3971	0.135576	0.0719467	0	1	7.86674e-62	1	3694	0.143064	0.106936	0	1	2.39279e-69	1	8.55597e-93	Monotone	TRUE	TRUE	FALSE	TRUE	TRUE	TRUE	FALSE	TRUE
orfmaxCostuORFsBio	3971	0.162298	0.108137	0	1	3.50286e-145	1	3694	0.172709	0.157681	0	1	1.81374e-160	1	8.87334e-140	Monotone	TRUE	TRUE	FALSE	TRUE	TRUE	TRUE	FALSE	TRUE
orfmeanCostuORFsBio	3971	0.138102	0.0701395	0	1	3.49784e-69	1	3694	0.145032	0.104405	0	1	6.20211e-74	1	1.60812e-90	Monotone	TRUE	TRUE	FALSE	TRUE	TRUE	TRUE	FALSE	TRUE
orfuORFs30CBio	3971	0.0916252	0.00528754	0.014	0.229	0.0142014	0.234499	3037	0.0950702	0.00267674	0.174	0.354	0.1697	0.342145	0.00434561	MIC not significant	TRUE	FALSE	FALSE	FALSE	TRUE	FALSE	FALSE	FALSE
orfmaxLenuORFs30CBio	3971	0.0881565	0.00562665	0.111	0.624	0.113446	0.644782	3037	0.0948922	0.00314824	0.206	0.431	0.216532	0.446234	0.00197954	MIC not significant	FALSE	FALSE	FALSE	FALSE	FALSE	FALSE	FALSE	FALSE
orfmeanLenuORFs30CBio	3971	0.0864673	0.00425343	0.255	0.679	0.262752	0.687309	3037	0.0917649	0.00154941	0.465	0.579	0.466735	0.582186	0.030069	MIC not significant	FALSE	FALSE	FALSE	FALSE	FALSE	FALSE	FALSE	FALSE
orfmaxCostuORFs30CBio	3971	0.101011	0.00549825	9.90099e-06	0.000821782	3.16275e-07	0.000296361	3037	0.116893	0.00298069	0	0	2.41125e-11	2.04847e-09	0.00261489	Non-monotone	TRUE	TRUE	TRUE	FALSE	TRUE	TRUE	TRUE	FALSE
orfmeanCostuORFs30CBio	3971	0.0887766	0.0041348	0.075	0.391	0.0718211	0.403117	3037	0.0986068	0.0014262	0.058	0.092	0.0432713	0.0784663	0.0374264	MIC not significant	FALSE	FALSE	FALSE	FALSE	FALSE	FALSE	FALSE	FALSE
orfuORFs200CBio	3971	0.106327	0.0236018	0	0.606703	6.51138e-11	0.616817	3928	0.104172	0.0216917	0	0.606584	2.94604e-09	0.61649	1.72108e-20	non-significant monotone/non-monotone	TRUE	TRUE	FALSE	FALSE	TRUE	TRUE	FALSE	FALSE
orfmaxLenuORFs200CBio	3971	0.160536	0.130064	0	1	9.79586e-107	1	3928	0.160715	0.129133	0	1	1.24469e-107	1	4.72357e-120	Monotone	TRUE	TRUE	FALSE	TRUE	TRUE	TRUE	FALSE	TRUE
orfmeanLenuORFs200CBio	3971	0.137201	0.0840459	0	1	1.53395e-64	1	3928	0.13703	0.0823983	0	1	2.07538e-64	1	2.1677e-75	Monotone	TRUE	TRUE	FALSE	TRUE	TRUE	TRUE	FALSE	TRUE
orfmaxCostuORFs200CBio	3971	0.158323	0.129474	0	1	2.54549e-132	1	3928	0.157904	0.128526	0	1	7.64195e-130	1	1.85689e-119	Monotone	TRUE	TRUE	FALSE	TRUE	TRUE	TRUE	FALSE	TRUE
orfmeanCostuORFs200CBio	3971	0.131698	0.0833063	0	1	1.2052e-53	1	3928	0.130558	0.0816471	0	1	8.18915e-51	1	1.08534e-74	Monotone	TRUE	TRUE	FALSE	TRUE	TRUE	TRUE	FALSE	TRUE
orfuORFs0Bio	3971	0.148323	0.122527	0	1	2.00499e-76	1	3860	0.142994	0.111556	0	1	1.07054e-62	1	3.0983e-101	Monotone	TRUE	TRUE	FALSE	TRUE	TRUE	TRUE	FALSE	TRUE
orfuORFs1Bio	3971	0.160396	0.110666	0	1	4.66191e-107	1	3751	0.159613	0.140653	0	1	2.06947e-95	1	1.37665e-125	Monotone	TRUE	TRUE	FALSE	TRUE	TRUE	TRUE	FALSE	TRUE
orfuORFs2Bio	3971	0.136613	0.0841174	0	1	2.88623e-51	1	3394	0.13114	0.0626072	0	1	1.32342e-29	1	1.30475e-49	Monotone	TRUE	TRUE	FALSE	TRUE	TRUE	TRUE	FALSE	TRUE
orfmaxLenuORFs0Bio	3971	0.170419	0.15891	0	1	8.5949e-136	1	3860	0.168925	0.148911	0	1	1.21101e-127	1	2.77379e-137	Monotone	TRUE	TRUE	FALSE	TRUE	TRUE	TRUE	FALSE	TRUE
orfmaxLenuORFs1Bio	3971	0.0895944	0.0097859	0.066	0.872	0.0553391	0.866718	3751	0.0934097	0.0126307	0.012	0.854	0.00829053	0.857552	5.10113e-12	MIC not significant	FALSE	TRUE	FALSE	FALSE	FALSE	TRUE	FALSE	FALSE
orfmaxLenuORFs2Bio	3971	0.113724	0.0448311	0	1	6.76031e-18	0.99999	3394	0.102202	0.0202483	0.000336634	0.930931	9.66368e-05	0.926468	8.13336e-17	non-significant monotone/non-monotone	TRUE	TRUE	FALSE	FALSE	TRUE	TRUE	FALSE	FALSE
orfmeanLenuORFs0Bio	3971	0.171358	0.148684	0	1	2.38165e-166	1	3860	0.164155	0.13843	0	1	7.10882e-137	1	5.16576e-127	Monotone	TRUE	TRUE	FALSE	TRUE	TRUE	TRUE	FALSE	TRUE
orfmeanLenuORFs1Bio	3971	0.0918061	0.00454688	0.016	0.181	0.0147223	0.166365	3751	0.092388	0.00554316	0.016	0.28	0.0172161	0.272232	5.00247e-06	non-significant monotone/non-monotone	TRUE	TRUE	FALSE	FALSE	TRUE	TRUE	FALSE	FALSE
orfmeanLenuORFs2Bio	3971	0.0970989	0.0180251	0.00016129	0.91529	8.29371e-05	0.912186	3394	0.0922306	0.0012438	0.133	0.203	0.136132	0.194756	0.0399272	MIC not significant	TRUE	FALSE	FALSE	FALSE	TRUE	FALSE	FALSE	FALSE
orfmaxCostuORFs0Bio	3971	0.171018	0.158256	0	1	1.79197e-178	1	3860	0.16919	0.148219	0	1	8.7472e-168	1	1.33326e-136	Monotone	TRUE	TRUE	FALSE	TRUE	TRUE	TRUE	FALSE	TRUE
orfmaxCostuORFs1Bio	3971	0.0866303	0.00884681	0.231	0.976	0.233079	0.966611	3751	0.0921258	0.0114304	0.023	0.903	0.019478	0.897259	5.21817e-11	MIC not significant	FALSE	TRUE	FALSE	FALSE	FALSE	TRUE	FALSE	FALSE
orfmaxCostuORFs2Bio	3971	0.115567	0.0428	0	0.999822	3.19207e-20	0.9993	3394	0.098978	0.0184652	0.00330693	0.978812	0.00167431	0.971038	1.85788e-15	Monotone	TRUE	TRUE	FALSE	TRUE	TRUE	TRUE	FALSE	TRUE
orfmeanCostuORFs0Bio	3971	0.172214	0.148959	0	1	2.51231e-184	1	3860	0.164814	0.138693	0	1	1.04877e-150	1	2.8603e-127	Monotone	TRUE	TRUE	FALSE	TRUE	TRUE	TRUE	FALSE	TRUE
orfmeanCostuORFs1Bio	3971	0.0946354	0.0047794	0.003	0.064	0.00125471	0.0606007	3751	0.0975787	0.00583375	0.001	0.057	0.000254207	0.0469447	2.82508e-06	non-significant monotone/non-monotone	TRUE	TRUE	FALSE	FALSE	TRUE	TRUE	FALSE	FALSE
orfmeanCostuORFs2Bio	3971	0.102113	0.0165076	0	0.302716	2.80967e-08	0.314805	3394	0.0931841	0.000759746	0.069	0.087	0.0741258	0.0955802	0.108382	MIC not significant	TRUE	FALSE	FALSE	FALSE	TRUE	FALSE	FALSE	FALSE
orfuORFs030CBio	3971	0.0838349	0.000470071	0.344	0.36	0.359753	0.382539	1064	0.135892	0.000439486	0.054	0.049	0.0511325	0.0446828	0.494547	MIC not significant	FALSE	FALSE	FALSE	FALSE	FALSE	FALSE	FALSE	FALSE
orfuORFs130CBio	3971	0.0878592	0.00298852	0.121	0.352	0.124383	0.361201	2356	0.0985769	0.00255984	0.467	0.638	0.476606	0.64383	0.0140464	MIC not significant	FALSE	FALSE	FALSE	FALSE	FALSE	FALSE	FALSE	FALSE
orfuORFs230CBio	3971	0.0812553	0.000863076	0.415	0.495	0.428234	0.498834	678	0.136014	0.00305529	0.369	0.433	0.383917	0.442351	0.150517	MIC not significant	FALSE	FALSE	FALSE	FALSE	FALSE	FALSE	FALSE	FALSE
orfmaxLenuORFs030CBio	3971	0.0838349	0.00328039	0.35	0.721	0.370289	0.711376	1064	0.209529	0.167486	0	1	3.47282e-26	1	3.1821e-44	MIC not significant	FALSE	TRUE	FALSE	FALSE	FALSE	TRUE	FALSE	FALSE
orfmaxLenuORFs130CBio	3971	0.0823405	0.00172918	0.684	0.837	0.7017	0.829983	2356	0.0953278	0.0001564	0.715	0.697	0.727574	0.709423	0.544033	MIC not significant	FALSE	FALSE	FALSE	FALSE	FALSE	FALSE	FALSE	FALSE
orfmaxLenuORFs230CBio	3971	0.0812553	0.000725345	0.422	0.475	0.443853	0.498918	678	0.15975	0.000425879	0.065	0.06	0.0576816	0.0462886	0.591671	MIC not significant	FALSE	FALSE	FALSE	FALSE	FALSE	FALSE	FALSE	FALSE
orfmeanLenuORFs030CBio	3971	0.0838349	0.00327793	0.37	0.685	0.357616	0.693626	1064	0.212721	0.167285	0	1	5.27793e-29	1	3.61853e-44	MIC not significant	FALSE	TRUE	FALSE	FALSE	FALSE	TRUE	FALSE	FALSE
orfmeanLenuORFs130CBio	3971	0.0819934	0.00139066	0.699	0.802	0.698193	0.801816	2356	0.0965012	6.1693e-07	0.64	0.602	0.654689	0.624802	0.969604	MIC not significant	FALSE	FALSE	FALSE	FALSE	FALSE	FALSE	FALSE	FALSE
orfmeanLenuORFs230CBio	3971	0.0812553	0.000707282	0.43	0.491	0.448747	0.499872	678	0.145471	0.000785319	0.385	0.364	0.397953	0.375885	0.466316	MIC not significant	FALSE	FALSE	FALSE	FALSE	FALSE	FALSE	FALSE	FALSE
orfmaxCostuORFs030CBio	3971	0.0883196	0.00327006	0.057	0.198	0.0499063	0.215909	1064	0.215093	0.16659	0	1	2.34366e-31	1	5.64896e-44	MIC not significant	FALSE	TRUE	FALSE	FALSE	FALSE	TRUE	FALSE	FALSE
orfmaxCostuORFs130CBio	3971	0.0824821	0.00163666	0.659	0.808	0.675521	0.806071	2356	0.0973399	8.73522e-05	0.591	0.568	0.610135	0.582513	0.650244	MIC not significant	FALSE	FALSE	FALSE	FALSE	FALSE	FALSE	FALSE	FALSE
orfmaxCostuORFs230CBio	3971	0.0812553	0.000703878	0.443	0.493	0.468764	0.521337	678	0.165105	0.000862573	0.021	0.018	0.0147168	0.0124021	0.44517	MIC not significant	FALSE	TRUE	FALSE	FALSE	FALSE	TRUE	FALSE	FALSE
orfmeanCostuORFs030CBio	3971	0.0838349	0.00326937	0.369	0.702	0.378297	0.708605	1064	0.211294	0.166533	0	1	1.25396e-28	1	5.85838e-44	MIC not significant	FALSE	TRUE	FALSE	FALSE	FALSE	TRUE	FALSE	FALSE
orfmeanCostuORFs130CBio	3971	0.0816704	0.00129714	0.739	0.833	0.752862	0.837019	2356	0.100102	7.6903e-06	0.403	0.365	0.42048	0.385935	0.892981	MIC not significant	FALSE	FALSE	FALSE	FALSE	FALSE	FALSE	FALSE	FALSE
orfmeanCostuORFs230CBio	3971	0.0812553	0.00068783	0.455	0.509	0.474695	0.523109	678	0.160492	0.00130284	0.061	0.061	0.0489104	0.0476596	0.348027	MIC not significant	FALSE	FALSE	FALSE	FALSE	FALSE	FALSE	FALSE	FALSE
orfuORFs0200CBio	3971	0.0957604	0.00341953	0.002	0.007	0.000260056	0.00510278	3689	0.0879854	0.0015774	0.272	0.402	0.287109	0.422169	0.0158478	MIC not significant	TRUE	FALSE	FALSE	FALSE	TRUE	FALSE	FALSE	FALSE
orfuORFs1200CBio	3971	0.107488	0.0228463	0	0.390129	8.77488e-12	0.400769	3903	0.105617	0.0190684	0	0.227069	6.0917e-10	0.231677	4.48724e-18	non-significant monotone/non-monotone	TRUE	TRUE	FALSE	FALSE	TRUE	TRUE	FALSE	FALSE
orfuORFs2200CBio	3971	0.0889056	0.0047631	0.071	0.408	0.0633912	0.413435	2662	0.0908644	0.00410929	0.798	0.956	0.794113	0.951128	0.000935447	MIC not significant	FALSE	FALSE	FALSE	FALSE	FALSE	FALSE	FALSE	FALSE
orfmaxLenuORFs0200CBio	3971	0.160536	0.128955	0	1	1.92422e-107	1	3689	0.176886	0.15299	0	1	4.61357e-136	1	3.872e-135	Monotone	TRUE	TRUE	FALSE	TRUE	TRUE	TRUE	FALSE	TRUE
orfmaxLenuORFs1200CBio	3971	0.0887337	0.000194706	0.086	0.082	0.089168	0.0853568	3903	0.089855	1.43898e-05	0.045	0.043	0.0454059	0.0395006	0.812724	MIC not significant	FALSE	FALSE	FALSE	FALSE	FALSE	FALSE	FALSE	FALSE
orfmaxLenuORFs2200CBio	3971	0.0851304	0.00424651	0.333	0.8	0.359703	0.793225	2662	0.101659	0.00295041	0.074	0.188	0.0747141	0.186988	0.00505904	MIC not significant	FALSE	FALSE	FALSE	FALSE	FALSE	FALSE	FALSE	FALSE
orfmeanLenuORFs0200CBio	3971	0.16225	0.128556	0	1	4.4694e-121	1	3689	0.175254	0.1525	0	1	9.17575e-147	1	1.12789e-134	Monotone	TRUE	TRUE	FALSE	TRUE	TRUE	TRUE	FALSE	TRUE
orfmeanLenuORFs1200CBio	3971	0.0866874	0.000940984	0.214	0.264	0.225376	0.288147	3903	0.0891838	0.00249489	0.08	0.209	0.0793256	0.218644	0.0017996	MIC not significant	FALSE	FALSE	FALSE	FALSE	FALSE	FALSE	FALSE	FALSE
orfmeanLenuORFs2200CBio	3971	0.0833739	0.00340828	0.582	0.861	0.591888	0.868837	2662	0.0902268	0.00154732	0.834	0.889	0.833393	0.89033	0.0424222	MIC not significant	FALSE	FALSE	FALSE	FALSE	FALSE	FALSE	FALSE	FALSE
orfmaxCostuORFs0200CBio	3971	0.160631	0.128206	0	1	6.66917e-139	1	3689	0.175398	0.152026	0	1	7.77324e-172	1	3.1636e-134	Monotone	TRUE	TRUE	FALSE	TRUE	TRUE	TRUE	FALSE	TRUE
orfmaxCostuORFs1200CBio	3971	0.0895732	0.000105106	0.059	0.054	0.0558497	0.0510332	3903	0.0888308	5.82193e-05	0.092	0.084	0.0807818	0.0718842	0.633689	MIC not significant	FALSE	FALSE	FALSE	FALSE	FALSE	FALSE	FALSE	FALSE
orfmaxCostuORFs2200CBio	3971	0.0835797	0.0038899	0.557	0.884	0.565352	0.8862	2662	0.0988956	0.00232165	0.191	0.338	0.198819	0.340641	0.0129085	MIC not significant	FALSE	FALSE	FALSE	FALSE	FALSE	FALSE	FALSE	FALSE
orfmeanCostuORFs0200CBio	3971	0.164405	0.128289	0	1	1.35778e-154	1	3689	0.173842	0.152146	0	1	2.6898e-163	1	2.43391e-134	Monotone	TRUE	TRUE	FALSE	TRUE	TRUE	TRUE	FALSE	TRUE
orfmeanCostuORFs1200CBio	3971	0.0871191	0.0011052	0.27	0.36	0.279737	0.380224	3903	0.0895393	0.00276871	0.106	0.303	0.0967965	0.318936	0.00100716	MIC not significant	FALSE	FALSE	FALSE	FALSE	FALSE	FALSE	FALSE	FALSE
orfmeanCostuORFs2200CBio	3971	0.081783	0.00298094	0.721	0.916	0.729145	0.917525	2662	0.0934031	0.000962413	0.639	0.692	0.643391	0.69252	0.109545	MIC not significant	FALSE	FALSE	FALSE	FALSE	FALSE	FALSE	FALSE	FALSE
orfgcWin1	3971	0.0858173	0.000315806	0.311	0.316	0.321902	0.325574	3971	0.0858173	0.000315806	0.28	0.291	0.282103	0.288907	0.26289	MIC not significant	FALSE	FALSE	FALSE	FALSE	FALSE	FALSE	FALSE	FALSE
orfgcWin2	3971	0.085601	0.000160711	0.316	0.302	0.333185	0.32398	3971	0.085601	0.000160711	0.324	0.309	0.33286	0.322756	0.424496	MIC not significant	FALSE	FALSE	FALSE	FALSE	FALSE	FALSE	FALSE	FALSE
orfgcWin3	3971	0.0864271	0.000219462	0.236	0.234	0.241085	0.240386	3971	0.0864271	0.000219462	0.256	0.251	0.248995	0.247529	0.35067	MIC not significant	FALSE	FALSE	FALSE	FALSE	FALSE	FALSE	FALSE	FALSE
orfgcWin4	3971	0.081312	0.000361405	0.808	0.822	0.80058	0.807579	3971	0.081312	0.000361405	0.784	0.789	0.791981	0.800347	0.231032	MIC not significant	FALSE	FALSE	FALSE	FALSE	FALSE	FALSE	FALSE	FALSE
orfgcWin5	3971	0.0853718	0.000446952	0.345	0.357	0.355773	0.375804	3971	0.0853718	0.000446952	0.351	0.376	0.344599	0.370218	0.182872	MIC not significant	FALSE	FALSE	FALSE	FALSE	FALSE	FALSE	FALSE	FALSE
orfgcWin6	3971	0.0839459	1.33743e-05	0.508	0.475	0.513872	0.486653	3971	0.0839459	1.33743e-05	0.495	0.467	0.508909	0.480955	0.817794	MIC not significant	FALSE	FALSE	FALSE	FALSE	FALSE	FALSE	FALSE	FALSE
orfgcWin7	3971	0.0843352	0.000125074	0.468	0.454	0.475964	0.459668	3971	0.0843352	0.000125074	0.435	0.43	0.460008	0.445193	0.481092	MIC not significant	FALSE	FALSE	FALSE	FALSE	FALSE	FALSE	FALSE	FALSE
orfgcWin8	3971	0.0824722	4.36945e-05	0.659	0.644	0.669207	0.649079	3971	0.0824722	4.36945e-05	0.668	0.649	0.670982	0.649338	0.677103	MIC not significant	FALSE	FALSE	FALSE	FALSE	FALSE	FALSE	FALSE	FALSE
orfgcWin9	3971	0.0819651	8.54293e-06	0.712	0.686	0.723126	0.699523	3971	0.0819651	8.54293e-06	0.697	0.67	0.709042	0.685328	0.853914	MIC not significant	FALSE	FALSE	FALSE	FALSE	FALSE	FALSE	FALSE	FALSE
orfgcWin10	3971	0.0823938	4.43617e-05	0.682	0.658	0.688215	0.667471	3971	0.0823938	4.43617e-05	0.694	0.671	0.693323	0.672272	0.674787	MIC not significant	FALSE	FALSE	FALSE	FALSE	FALSE	FALSE	FALSE	FALSE
orfgcWin11	3971	0.0815396	6.83769e-05	0.766	0.754	0.767051	0.752228	3971	0.0815396	6.83769e-05	0.764	0.746	0.766505	0.750353	0.602419	MIC not significant	FALSE	FALSE	FALSE	FALSE	FALSE	FALSE	FALSE	FALSE
orfgcWin12	3971	0.0846567	0.000127543	0.393	0.374	0.403707	0.390325	3971	0.0846567	0.000127543	0.436	0.417	0.443613	0.430356	0.476795	MIC not significant	FALSE	FALSE	FALSE	FALSE	FALSE	FALSE	FALSE	FALSE
orfgcWin13	3971	0.0814846	0.000654315	0.785	0.812	0.778226	0.812183	3971	0.0814846	0.000654315	0.776	0.812	0.775715	0.809709	0.107032	MIC not significant	FALSE	FALSE	FALSE	FALSE	FALSE	FALSE	FALSE	FALSE
orfgcWin14	3971	0.0844031	0.000471203	0.417	0.436	0.445127	0.471226	3971	0.0844031	0.000471203	0.454	0.477	0.470499	0.493566	0.171428	MIC not significant	FALSE	FALSE	FALSE	FALSE	FALSE	FALSE	FALSE	FALSE
orfgcWin15	3971	0.0875197	0.000616228	0.188	0.21	0.169221	0.196114	3971	0.0875197	0.000616228	0.15	0.186	0.157228	0.18471	0.117806	MIC not significant	FALSE	FALSE	FALSE	FALSE	FALSE	FALSE	FALSE	FALSE
orfgcWin16	3971	0.0852985	0.000987996	0.342	0.422	0.352043	0.433116	3971	0.0852985	0.000987996	0.328	0.405	0.347082	0.426526	0.0476355	MIC not significant	FALSE	FALSE	FALSE	FALSE	FALSE	FALSE	FALSE	FALSE
orfgcWin17	3971	0.0829897	0.000856586	0.605	0.673	0.615163	0.678931	3971	0.0829897	0.000856586	0.592	0.66	0.605513	0.670468	0.0651641	MIC not significant	FALSE	FALSE	FALSE	FALSE	FALSE	FALSE	FALSE	FALSE
orfgcWin18	3971	0.0824399	0.00101764	0.648	0.733	0.661606	0.741355	3971	0.0824399	0.00101764	0.66	0.736	0.665974	0.740476	0.0444192	MIC not significant	FALSE	FALSE	FALSE	FALSE	FALSE	FALSE	FALSE	FALSE
orfgcWin19	3971	0.0859992	0.00108558	0.276	0.363	0.294375	0.381333	3971	0.0859992	0.00108558	0.271	0.346	0.271708	0.359085	0.0378787	MIC not significant	FALSE	FALSE	FALSE	FALSE	FALSE	FALSE	FALSE	FALSE
orfgcWin20	3971	0.0875997	0.00107232	0.158	0.202	0.14875	0.20735	3971	0.0875997	0.00107232	0.161	0.21	0.159728	0.222821	0.0390713	MIC not significant	FALSE	FALSE	FALSE	FALSE	FALSE	FALSE	FALSE	FALSE
orfgcWin21	3971	0.0889853	0.00152432	0.078	0.145	0.0780661	0.146181	3971	0.0889853	0.00152432	0.071	0.13	0.0736216	0.137921	0.0138758	MIC not significant	FALSE	FALSE	FALSE	FALSE	FALSE	FALSE	FALSE	FALSE
orfgcWin22	3971	0.0898189	0.00214677	0.057	0.145	0.0543373	0.140348	3971	0.0898189	0.00214677	0.044	0.11	0.0400244	0.116736	0.00349609	MIC not significant	FALSE	FALSE	FALSE	FALSE	FALSE	FALSE	FALSE	FALSE
orfgcWin23	3971	0.0862951	0.00256267	0.283	0.489	0.26863	0.508762	3971	0.0862951	0.00256267	0.231	0.51	0.244753	0.500552	0.0014174	MIC not significant	FALSE	FALSE	FALSE	FALSE	FALSE	FALSE	FALSE	FALSE
orfgcWin24	3971	0.0875862	0.00261154	0.159	0.341	0.147121	0.350219	3971	0.0875862	0.00261154	0.153	0.366	0.157235	0.370305	0.00127564	MIC not significant	FALSE	FALSE	FALSE	FALSE	FALSE	FALSE	FALSE	FALSE
orfgcWin25	3971	0.0856226	0.0027696	0.319	0.583	0.315952	0.597116	3971	0.0856226	0.0027696	0.31	0.597	0.315983	0.599295	0.000907981	MIC not significant	FALSE	FALSE	FALSE	FALSE	FALSE	FALSE	FALSE	FALSE
orfgcWin26	3971	0.0857838	0.00286117	0.293	0.573	0.29071	0.586702	3971	0.0857838	0.00286117	0.282	0.581	0.294665	0.594652	0.00074606	MIC not significant	FALSE	FALSE	FALSE	FALSE	FALSE	FALSE	FALSE	FALSE
orfgcWin27	3971	0.0843924	0.00303121	0.436	0.746	0.453463	0.751123	3971	0.0843924	0.00303121	0.411	0.732	0.450584	0.74184	0.000518587	MIC not significant	FALSE	FALSE	FALSE	FALSE	FALSE	FALSE	FALSE	FALSE
orfgcWin28	3971	0.0858698	0.00390969	0.291	0.685	0.296279	0.70135	3971	0.0858698	0.00390969	0.295	0.692	0.3095	0.695907	8.05206e-05	MIC not significant	FALSE	FALSE	FALSE	FALSE	FALSE	FALSE	FALSE	FALSE
orfgcWin29	3971	0.0864432	0.00395153	0.243	0.632	0.246242	0.648099	3971	0.0864432	0.00395153	0.226	0.62	0.239171	0.635814	7.37275e-05	MIC not significant	FALSE	FALSE	FALSE	FALSE	FALSE	FALSE	FALSE	FALSE
orfgcWin30	3971	0.0850308	0.00385145	0.378	0.748	0.382621	0.758598	3971	0.0850308	0.00385145	0.38	0.759	0.38868	0.76963	9.10391e-05	MIC not significant	FALSE	FALSE	FALSE	FALSE	FALSE	FALSE	FALSE	FALSE
orfgcWin31	3971	0.0836761	0.00454276	0.541	0.904	0.548025	0.906019	3971	0.0836761	0.00454276	0.513	0.904	0.535591	0.90442	2.1304e-05	MIC not significant	FALSE	FALSE	FALSE	FALSE	FALSE	FALSE	FALSE	FALSE
orfgcWin32	3971	0.0878354	0.00386529	0.137	0.461	0.137189	0.48341	3971	0.0878354	0.00386529	0.152	0.469	0.145276	0.49075	8.84214e-05	MIC not significant	FALSE	FALSE	FALSE	FALSE	FALSE	FALSE	FALSE	FALSE
orfgcWin33	3971	0.0848034	0.00367526	0.372	0.768	0.402916	0.772273	3971	0.0848034	0.00367526	0.377	0.757	0.400731	0.770514	0.000132061	MIC not significant	FALSE	FALSE	FALSE	FALSE	FALSE	FALSE	FALSE	FALSE
orfgcWin34	3971	0.0820099	0.00352015	0.697	0.932	0.706797	0.927814	3971	0.0820099	0.00352015	0.697	0.937	0.703654	0.929976	0.00018336	MIC not significant	FALSE	FALSE	FALSE	FALSE	FALSE	FALSE	FALSE	FALSE
orfgcWin35	3971	0.0831378	0.00283808	0.585	0.849	0.595571	0.841337	3971	0.0831378	0.00283808	0.563	0.828	0.573875	0.828145	0.000783923	MIC not significant	FALSE	FALSE	FALSE	FALSE	FALSE	FALSE	FALSE	FALSE
orfgcWin36	3971	0.084471	0.00379772	0.451	0.799	0.453625	0.799651	3971	0.084471	0.00379772	0.415	0.801	0.435909	0.803365	0.000101966	MIC not significant	FALSE	FALSE	FALSE	FALSE	FALSE	FALSE	FALSE	FALSE
orfgcWin37	3971	0.0889008	0.00450507	0.082	0.426	0.0765513	0.42708	3971	0.0889008	0.00450507	0.072	0.412	0.0686108	0.410332	2.30537e-05	MIC not significant	FALSE	FALSE	FALSE	FALSE	FALSE	FALSE	FALSE	FALSE
orfgcWin38	3971	0.0886929	0.0038645	0.087	0.368	0.0880665	0.371764	3971	0.0886929	0.0038645	0.081	0.352	0.0774487	0.360817	8.85688e-05	MIC not significant	FALSE	FALSE	FALSE	FALSE	FALSE	FALSE	FALSE	FALSE
orfgcWin39	3971	0.0853169	0.00410477	0.338	0.771	0.356864	0.776518	3971	0.0853169	0.00410477	0.346	0.764	0.352299	0.769416	5.34029e-05	MIC not significant	FALSE	FALSE	FALSE	FALSE	FALSE	FALSE	FALSE	FALSE
orfgcWin40	3970	0.0873816	0.00445808	0.159	0.589	0.173399	0.593228	3970	0.0873816	0.00445808	0.162	0.602	0.171612	0.601939	2.54985e-05	MIC not significant	FALSE	FALSE	FALSE	FALSE	FALSE	FALSE	FALSE	FALSE
orfgcWin41	3970	0.0904417	0.004095	0.034	0.236	0.0321107	0.231121	3970	0.0904417	0.004095	0.059	0.243	0.0448681	0.260693	5.46297e-05	MIC not significant	FALSE	FALSE	FALSE	FALSE	FALSE	FALSE	FALSE	FALSE
orfgcWin42	3970	0.0931031	0.00431167	0.009	0.084	0.00633022	0.0830645	3970	0.0931031	0.00431167	0.005	0.076	0.00364529	0.0689848	3.4659e-05	non-significant monotone/non-monotone	TRUE	TRUE	FALSE	FALSE	TRUE	TRUE	FALSE	FALSE
orfgcWin43	3970	0.0908141	0.00478554	0.027	0.268	0.028883	0.268281	3970	0.0908141	0.00478554	0.035	0.264	0.0304096	0.271792	1.28531e-05	non-significant monotone/non-monotone	FALSE	FALSE	FALSE	FALSE	FALSE	TRUE	FALSE	FALSE
orfgcWin44	3970	0.0885984	0.00410573	0.104	0.41	0.0967743	0.425365	3970	0.0885984	0.00410573	0.076	0.405	0.0781254	0.397881	5.34111e-05	MIC not significant	FALSE	FALSE	FALSE	FALSE	FALSE	FALSE	FALSE	FALSE
orfgcWin45	3970	0.0898051	0.00355966	0.058	0.239	0.051096	0.239737	3970	0.0898051	0.00355966	0.052	0.233	0.0478059	0.241285	0.000168965	MIC not significant	FALSE	FALSE	FALSE	FALSE	FALSE	FALSE	FALSE	FALSE
orfgcWin46	3970	0.0844276	0.00345461	0.421	0.759	0.427459	0.766243	3970	0.0844276	0.00345461	0.462	0.773	0.452253	0.787706	0.000211069	MIC not significant	FALSE	FALSE	FALSE	FALSE	FALSE	FALSE	FALSE	FALSE
orfgcWin47	3970	0.0835259	0.00291109	0.568	0.834	0.570477	0.821103	3970	0.0835259	0.00291109	0.526	0.794	0.531766	0.796307	0.00067147	MIC not significant	FALSE	FALSE	FALSE	FALSE	FALSE	FALSE	FALSE	FALSE
orfgcWin48	3970	0.0875713	0.00353662	0.141	0.46	0.159514	0.477911	3970	0.0875713	0.00353662	0.167	0.47	0.165561	0.481463	0.000177409	MIC not significant	FALSE	FALSE	FALSE	FALSE	FALSE	FALSE	FALSE	FALSE
orfgcWin49	3970	0.0884839	0.00292938	0.098	0.299	0.0952757	0.308145	3970	0.0884839	0.00292938	0.114	0.309	0.109605	0.317437	0.000645711	MIC not significant	FALSE	FALSE	FALSE	FALSE	FALSE	FALSE	FALSE	FALSE
orfgcWin50	3970	0.0862196	0.00274597	0.281	0.529	0.283999	0.552066	3970	0.0862196	0.00274597	0.254	0.538	0.267984	0.540993	0.000956659	MIC not significant	FALSE	FALSE	FALSE	FALSE	FALSE	FALSE	FALSE	FALSE
orfgcWin51	3970	0.0882184	0.00243432	0.134	0.294	0.127037	0.29785	3970	0.0882184	0.00243432	0.12	0.274	0.12152	0.291345	0.00187306	MIC not significant	FALSE	FALSE	FALSE	FALSE	FALSE	FALSE	FALSE	FALSE
orfgcWin52	3970	0.0848463	0.00263704	0.375	0.658	0.387534	0.656469	3970	0.0848463	0.00263704	0.383	0.676	0.411077	0.672289	0.00120917	MIC not significant	FALSE	FALSE	FALSE	FALSE	FALSE	FALSE	FALSE	FALSE
orfgcWin53	3970	0.0825875	0.0019826	0.64	0.795	0.649871	0.809981	3970	0.0825875	0.0019826	0.636	0.804	0.642595	0.80633	0.00501572	MIC not significant	FALSE	FALSE	FALSE	FALSE	FALSE	FALSE	FALSE	FALSE
orfgcWin54	3970	0.0832011	0.00233477	0.573	0.806	0.596944	0.799393	3970	0.0832011	0.00233477	0.587	0.783	0.597335	0.796365	0.00232427	MIC not significant	FALSE	FALSE	FALSE	FALSE	FALSE	FALSE	FALSE	FALSE
orfgcWin55	3970	0.0889652	0.00205511	0.074	0.169	0.073934	0.179149	3970	0.0889652	0.00205511	0.078	0.185	0.0753845	0.179987	0.00427764	MIC not significant	FALSE	FALSE	FALSE	FALSE	FALSE	FALSE	FALSE	FALSE
orfgcWin56	3970	0.0814781	0.00134347	0.756	0.854	0.765358	0.848174	3970	0.0814781	0.00134347	0.769	0.857	0.778029	0.859992	0.0209155	MIC not significant	FALSE	FALSE	FALSE	FALSE	FALSE	FALSE	FALSE	FALSE
orfgcWin57	3970	0.0807266	0.00107879	0.822	0.879	0.823011	0.876985	3970	0.0807266	0.00107879	0.843	0.892	0.832516	0.884754	0.0385089	MIC not significant	FALSE	FALSE	FALSE	FALSE	FALSE	FALSE	FALSE	FALSE
orfgcWin58	3970	0.084234	0.00125059	0.476	0.572	0.467747	0.578673	3970	0.084234	0.00125059	0.473	0.579	0.472828	0.584367	0.0258678	MIC not significant	FALSE	FALSE	FALSE	FALSE	FALSE	FALSE	FALSE	FALSE
orfgcWin59	3970	0.0862909	0.00123107	0.277	0.358	0.264501	0.364183	3970	0.0862909	0.00123107	0.251	0.354	0.252916	0.35008	0.0270553	MIC not significant	FALSE	FALSE	FALSE	FALSE	FALSE	FALSE	FALSE	FALSE
orfgcWin60	3970	0.0860265	0.00116519	0.261	0.349	0.276632	0.369494	3970	0.0860265	0.00116519	0.257	0.359	0.270785	0.364359	0.0314987	MIC not significant	FALSE	FALSE	FALSE	FALSE	FALSE	FALSE	FALSE	FALSE
orfgcWin61	3970	0.0830894	0.00112255	0.606	0.7	0.606549	0.699116	3970	0.0830894	0.00112255	0.6	0.677	0.603602	0.693017	0.0347746	MIC not significant	FALSE	FALSE	FALSE	FALSE	FALSE	FALSE	FALSE	FALSE
orfgcWin62	3970	0.0880329	0.000724446	0.134	0.163	0.129158	0.158659	3970	0.0880329	0.000724446	0.135	0.167	0.133678	0.163048	0.0899492	MIC not significant	FALSE	FALSE	FALSE	FALSE	FALSE	FALSE	FALSE	FALSE
orfgcWin63	3970	0.0867763	0.000563086	0.224	0.246	0.231763	0.257244	3970	0.0867763	0.000563086	0.211	0.244	0.203897	0.232377	0.134945	MIC not significant	FALSE	FALSE	FALSE	FALSE	FALSE	FALSE	FALSE	FALSE
orfgcWin64	3970	0.0824469	0.000582118	0.67	0.709	0.676092	0.709658	3970	0.0824469	0.000582118	0.663	0.7	0.669668	0.704092	0.128525	MIC not significant	FALSE	FALSE	FALSE	FALSE	FALSE	FALSE	FALSE	FALSE
orfgcWin65	3970	0.0843637	0.000387172	0.493	0.507	0.483222	0.499834	3970	0.0843637	0.000387172	0.45	0.468	0.463262	0.478086	0.215154	MIC not significant	FALSE	FALSE	FALSE	FALSE	FALSE	FALSE	FALSE	FALSE
orfgcWin66	3970	0.0868169	0.000465178	0.22	0.234	0.226505	0.245074	3970	0.0868169	0.000465178	0.208	0.219	0.21996	0.236042	0.174247	MIC not significant	FALSE	FALSE	FALSE	FALSE	FALSE	FALSE	FALSE	FALSE
orfgcWin67	3970	0.0879793	0.000532449	0.138	0.15	0.135037	0.153277	3970	0.0879793	0.000532449	0.15	0.163	0.144225	0.161129	0.146047	MIC not significant	FALSE	FALSE	FALSE	FALSE	FALSE	FALSE	FALSE	FALSE
orfgcWin68	3970	0.0849242	0.00038317	0.369	0.385	0.389711	0.404314	3970	0.0849242	0.00038317	0.406	0.413	0.423233	0.438505	0.217541	MIC not significant	FALSE	FALSE	FALSE	FALSE	FALSE	FALSE	FALSE	FALSE
orfgcWin69	3970	0.0802702	0.000416831	0.865	0.875	0.870892	0.879359	3970	0.0802702	0.000416831	0.846	0.859	0.854842	0.865056	0.198399	MIC not significant	FALSE	FALSE	FALSE	FALSE	FALSE	FALSE	FALSE	FALSE
orfgcWin70	3970	0.0816074	0.000363765	0.746	0.763	0.754546	0.766307	3970	0.0816074	0.000363765	0.753	0.76	0.768718	0.779712	0.229574	MIC not significant	FALSE	FALSE	FALSE	FALSE	FALSE	FALSE	FALSE	FALSE
orfgcWin71	3970	0.0826928	0.000182653	0.644	0.642	0.653292	0.648199	3970	0.0826928	0.000182653	0.646	0.635	0.655351	0.646852	0.394593	MIC not significant	FALSE	FALSE	FALSE	FALSE	FALSE	FALSE	FALSE	FALSE
orfgcWin72	3970	0.0781194	0.000156788	0.973	0.976	0.960379	0.957555	3970	0.0781194	0.000156788	0.956	0.954	0.957699	0.954895	0.430265	MIC not significant	FALSE	FALSE	FALSE	FALSE	FALSE	FALSE	FALSE	FALSE
orfgcWin73	3968	0.0845958	0.000165034	0.454	0.441	0.44594	0.436347	3968	0.0845958	0.000165034	0.413	0.402	0.425909	0.416182	0.418509	MIC not significant	FALSE	FALSE	FALSE	FALSE	FALSE	FALSE	FALSE	FALSE
orfgcWin74	3968	0.0841595	0.000248132	0.475	0.472	0.471491	0.472124	3968	0.0841595	0.000248132	0.476	0.479	0.487557	0.484894	0.321191	MIC not significant	FALSE	FALSE	FALSE	FALSE	FALSE	FALSE	FALSE	FALSE
orfgcWin75	3968	0.084237	0.000184759	0.452	0.449	0.468705	0.461163	3968	0.084237	0.000184759	0.478	0.461	0.480403	0.472905	0.392	MIC not significant	FALSE	FALSE	FALSE	FALSE	FALSE	FALSE	FALSE	FALSE
orfgcWin76	3968	0.0868589	0.000107817	0.194	0.182	0.205912	0.196026	3968	0.0868589	0.000107817	0.226	0.219	0.221402	0.207741	0.513184	MIC not significant	FALSE	FALSE	FALSE	FALSE	FALSE	FALSE	FALSE	FALSE
orfgcWin77	3968	0.089737	9.58778e-05	0.06	0.055	0.0536049	0.048701	3968	0.089737	9.58778e-05	0.062	0.053	0.0466619	0.0416034	0.537485	MIC not significant	FALSE	FALSE	FALSE	FALSE	FALSE	FALSE	FALSE	FALSE
orfgcWin78	3968	0.0891125	0.000308824	0.071	0.074	0.0760372	0.0788999	3968	0.0891125	0.000308824	0.079	0.084	0.0786759	0.0811404	0.268415	MIC not significant	FALSE	FALSE	FALSE	FALSE	FALSE	FALSE	FALSE	FALSE
orfgcWin79	3967	0.088702	0.000214028	0.103	0.099	0.10601	0.106218	3967	0.088702	0.000214028	0.105	0.102	0.0991702	0.0967554	0.356947	MIC not significant	FALSE	FALSE	FALSE	FALSE	FALSE	FALSE	FALSE	FALSE
orfgcWin80	3967	0.0865061	4.49456e-05	0.266	0.254	0.265828	0.248291	3967	0.0865061	4.49456e-05	0.22	0.203	0.23411	0.217312	0.672933	MIC not significant	FALSE	FALSE	FALSE	FALSE	FALSE	FALSE	FALSE	FALSE
orfgcWin81	3967	0.0884597	5.28847e-05	0.105	0.103	0.101007	0.0922602	3967	0.0884597	5.28847e-05	0.107	0.098	0.112527	0.101958	0.647029	MIC not significant	FALSE	FALSE	FALSE	FALSE	FALSE	FALSE	FALSE	FALSE
orfgcWin82	3967	0.0858859	0.000131406	0.28	0.262	0.292149	0.279673	3967	0.0858859	0.000131406	0.313	0.302	0.312234	0.300008	0.470418	MIC not significant	FALSE	FALSE	FALSE	FALSE	FALSE	FALSE	FALSE	FALSE
orfgcWin83	3967	0.08848	4.45023e-05	0.085	0.075	0.0921012	0.0810294	3967	0.08848	4.45023e-05	0.091	0.08	0.0932605	0.0832874	0.674457	MIC not significant	FALSE	FALSE	FALSE	FALSE	FALSE	FALSE	FALSE	FALSE
orfgcWin84	3967	0.090773	3.15467e-05	0.024	0.02	0.024697	0.0208513	3967	0.090773	3.15467e-05	0.042	0.038	0.0311075	0.027421	0.723601	Non-monotone	FALSE	FALSE	FALSE	FALSE	FALSE	TRUE	FALSE	FALSE
orfgcWin85	3967	0.0877169	0.000162714	0.144	0.13	0.147052	0.14005	3967	0.0877169	0.000162714	0.149	0.14	0.156152	0.149655	0.421859	MIC not significant	FALSE	FALSE	FALSE	FALSE	FALSE	FALSE	FALSE	FALSE
orfgcWin86	3967	0.0908241	0.000177204	0.04	0.037	0.0319371	0.0304201	3967	0.0908241	0.000177204	0.03	0.032	0.0299298	0.0284854	0.401916	Non-monotone	FALSE	TRUE	FALSE	FALSE	FALSE	TRUE	FALSE	FALSE
orfgcWin87	3967	0.0892745	0.000297513	0.064	0.068	0.0568213	0.0590844	3967	0.0892745	0.000297513	0.072	0.073	0.0686735	0.0705417	0.277424	MIC not significant	FALSE	FALSE	FALSE	FALSE	FALSE	FALSE	FALSE	FALSE
orfgcWin88	3967	0.0881686	0.000312923	0.117	0.118	0.125254	0.128572	3967	0.0881686	0.000312923	0.131	0.133	0.130165	0.133389	0.265322	MIC not significant	FALSE	FALSE	FALSE	FALSE	FALSE	FALSE	FALSE	FALSE
orfgcWin89	3967	0.0879147	0.000280021	0.144	0.139	0.142156	0.144984	3967	0.0879147	0.000280021	0.137	0.136	0.132102	0.133423	0.292017	MIC not significant	FALSE	FALSE	FALSE	FALSE	FALSE	FALSE	FALSE	FALSE
orfgcWin90	3967	0.090875	0.000323716	0.029	0.027	0.0232503	0.0241675	3967	0.090875	0.000323716	0.036	0.037	0.0294109	0.0304361	0.257235	Non-monotone	FALSE	FALSE	FALSE	FALSE	FALSE	TRUE	FALSE	FALSE
orfgcWin91	3967	0.0892657	0.000289293	0.082	0.086	0.0749132	0.0755568	3967	0.0892657	0.000289293	0.087	0.089	0.0784918	0.0796702	0.284164	MIC not significant	FALSE	FALSE	FALSE	FALSE	FALSE	FALSE	FALSE	FALSE
orfgcWin92	3967	0.0878485	0.000188173	0.152	0.143	0.141954	0.137909	3967	0.0878485	0.000188173	0.151	0.14	0.144564	0.140216	0.38772	MIC not significant	FALSE	FALSE	FALSE	FALSE	FALSE	FALSE	FALSE	FALSE
orfgcWin93	3967	0.0868325	0.000229469	0.23	0.227	0.237531	0.232547	3967	0.0868325	0.000229469	0.205	0.2	0.214867	0.212127	0.340158	MIC not significant	FALSE	FALSE	FALSE	FALSE	FALSE	FALSE	FALSE	FALSE
orfgcWin94	3967	0.0815662	0.000282818	0.772	0.776	0.768787	0.770256	3967	0.0815662	0.000282818	0.766	0.768	0.771533	0.775643	0.289619	MIC not significant	FALSE	FALSE	FALSE	FALSE	FALSE	FALSE	FALSE	FALSE
orfgcWin95	3967	0.0841875	0.000203761	0.471	0.47	0.492563	0.487841	3967	0.0841875	0.000203761	0.472	0.466	0.50277	0.496852	0.368744	MIC not significant	FALSE	FALSE	FALSE	FALSE	FALSE	FALSE	FALSE	FALSE
orfgcWin96	3967	0.0844	0.000341414	0.474	0.482	0.457353	0.466771	3967	0.0844	0.000341414	0.439	0.447	0.454453	0.464921	0.24462	MIC not significant	FALSE	FALSE	FALSE	FALSE	FALSE	FALSE	FALSE	FALSE
orfgcWin97	3967	0.0844593	0.00040249	0.438	0.464	0.442812	0.460064	3967	0.0844593	0.00040249	0.436	0.454	0.443217	0.46045	0.206472	MIC not significant	FALSE	FALSE	FALSE	FALSE	FALSE	FALSE	FALSE	FALSE
orfgcWin98	3967	0.0817742	0.000360982	0.749	0.756	0.752615	0.761183	3967	0.0817742	0.000360982	0.742	0.759	0.752684	0.76237	0.231541	MIC not significant	FALSE	FALSE	FALSE	FALSE	FALSE	FALSE	FALSE	FALSE
orfgcWin99	3967	0.0841151	0.000326122	0.514	0.526	0.502058	0.51157	3967	0.0841151	0.000326122	0.509	0.515	0.49985	0.506594	0.255474	MIC not significant	FALSE	FALSE	FALSE	FALSE	FALSE	FALSE	FALSE	FALSE
orfgcWin100	3967	0.0817306	0.000570316	0.743	0.771	0.743312	0.772193	3967	0.0817306	0.000570316	0.736	0.762	0.742282	0.773063	0.132611	MIC not significant	FALSE	FALSE	FALSE	FALSE	FALSE	FALSE	FALSE	FALSE
orfmeanFEWin1	3971	0.0873822	0.00124387	0.16	0.234	0.16046	0.237516	3971	0.0873822	0.00124387	0.167	0.236	0.163226	0.238663	0.0262515	MIC not significant	FALSE	FALSE	FALSE	FALSE	FALSE	FALSE	FALSE	FALSE
orfmeanFEWin2	3971	0.0896402	0.00121199	0.058	0.1	0.0551708	0.095388	3971	0.0896402	0.00121199	0.062	0.082	0.0509847	0.088425	0.0282507	MIC not significant	FALSE	FALSE	FALSE	FALSE	FALSE	FALSE	FALSE	FALSE
orfmeanFEWin3	3971	0.0945469	0.000925386	0.001	0.001	0.00128196	0.00246777	3971	0.0945469	0.000925386	0.004	0.006	0.00190342	0.00330327	0.0552643	Non-monotone	TRUE	TRUE	FALSE	FALSE	TRUE	TRUE	FALSE	FALSE
orfmeanFEWin4	3971	0.0903693	0.000282741	0.043	0.044	0.0386809	0.0385176	3971	0.0903693	0.000282741	0.046	0.044	0.0399313	0.0401039	0.289441	Non-monotone	FALSE	FALSE	FALSE	FALSE	FALSE	FALSE	FALSE	FALSE
orfmeanFEWin5	3971	0.0884996	0.000497744	0.105	0.117	0.0923869	0.104239	3971	0.0884996	0.000497744	0.105	0.115	0.0979751	0.109442	0.159835	MIC not significant	FALSE	FALSE	FALSE	FALSE	FALSE	FALSE	FALSE	FALSE
orfmeanFEWin6	3971	0.0885285	0.000430409	0.111	0.116	0.106045	0.113922	3971	0.0885285	0.000430409	0.102	0.108	0.0949163	0.104242	0.191187	MIC not significant	FALSE	FALSE	FALSE	FALSE	FALSE	FALSE	FALSE	FALSE
orfmeanFEWin7	3971	0.0869968	5.30777e-05	0.184	0.17	0.18227	0.167269	3971	0.0869968	5.30777e-05	0.178	0.166	0.19037	0.174642	0.646263	MIC not significant	FALSE	FALSE	FALSE	FALSE	FALSE	FALSE	FALSE	FALSE
orfmeanFEWin8	3971	0.0878879	2.86893e-05	0.119	0.103	0.116199	0.102408	3971	0.0878879	2.86893e-05	0.14	0.123	0.134976	0.122091	0.735797	MIC not significant	FALSE	FALSE	FALSE	FALSE	FALSE	FALSE	FALSE	FALSE
orfmeanFEWin9	3971	0.0916557	2.61754e-07	0.021	0.018	0.0123198	0.0100903	3971	0.0916557	2.61754e-07	0.016	0.013	0.0150734	0.0124471	0.974289	Non-monotone	FALSE	TRUE	FALSE	FALSE	TRUE	TRUE	FALSE	FALSE
orfmeanFEWin10	3971	0.0933714	3.33117e-05	0.008	0.006	0.00508094	0.00425278	3971	0.0933714	3.33117e-05	0.012	0.008	0.00389935	0.00328722	0.716162	Non-monotone	TRUE	TRUE	FALSE	FALSE	TRUE	TRUE	FALSE	FALSE
orfmeanFEWin11	3971	0.0905245	1.63605e-05	0.043	0.035	0.0338016	0.0288288	3971	0.0905245	1.63605e-05	0.028	0.025	0.0272055	0.0228819	0.798871	Non-monotone	FALSE	TRUE	FALSE	FALSE	FALSE	TRUE	FALSE	FALSE
orfmeanFEWin12	3971	0.0862539	4.85968e-05	0.265	0.241	0.256172	0.238826	3971	0.0862539	4.85968e-05	0.262	0.241	0.271285	0.252786	0.660546	MIC not significant	FALSE	FALSE	FALSE	FALSE	FALSE	FALSE	FALSE	FALSE
orfmeanFEWin13	3971	0.0892596	0.000129737	0.061	0.057	0.0631825	0.0589928	3971	0.0892596	0.000129737	0.055	0.053	0.0599805	0.055671	0.473027	MIC not significant	FALSE	FALSE	FALSE	FALSE	FALSE	FALSE	FALSE	FALSE
orfmeanFEWin14	3971	0.087953	0.000312861	0.125	0.131	0.114701	0.118095	3971	0.087953	0.000312861	0.141	0.144	0.137272	0.141855	0.265128	MIC not significant	FALSE	FALSE	FALSE	FALSE	FALSE	FALSE	FALSE	FALSE
orfmeanFEWin15	3971	0.0895983	0.000849582	0.063	0.091	0.064488	0.0873883	3971	0.0895983	0.000849582	0.074	0.097	0.0604035	0.0832974	0.066273	MIC not significant	FALSE	FALSE	FALSE	FALSE	FALSE	FALSE	FALSE	FALSE
orfmeanFEWin16	3971	0.0891146	0.00152811	0.048	0.109	0.052608	0.106872	3971	0.0891146	0.00152811	0.068	0.122	0.0594511	0.116742	0.0137579	MIC not significant	FALSE	FALSE	FALSE	FALSE	FALSE	FALSE	FALSE	FALSE
orfmeanFEWin17	3971	0.0847817	0.00173303	0.419	0.583	0.424199	0.591748	3971	0.0847817	0.00173303	0.396	0.538	0.402836	0.567726	0.00869961	MIC not significant	FALSE	FALSE	FALSE	FALSE	FALSE	FALSE	FALSE	FALSE
orfmeanFEWin18	3971	0.0850903	0.00202306	0.403	0.585	0.391891	0.591321	3971	0.0850903	0.00202306	0.362	0.554	0.360665	0.562886	0.00458401	MIC not significant	FALSE	FALSE	FALSE	FALSE	FALSE	FALSE	FALSE	FALSE
orfmeanFEWin19	3971	0.0856626	0.00291958	0.3	0.595	0.30608	0.60602	3971	0.0856626	0.00291958	0.31	0.599	0.304354	0.602971	0.000658352	MIC not significant	FALSE	FALSE	FALSE	FALSE	FALSE	FALSE	FALSE	FALSE
orfmeanFEWin20	3971	0.0876152	0.00435702	0.166	0.585	0.172676	0.586982	3971	0.0876152	0.00435702	0.142	0.531	0.147596	0.551004	3.14415e-05	MIC not significant	FALSE	FALSE	FALSE	FALSE	FALSE	FALSE	FALSE	FALSE
orfmeanFEWin21	3971	0.0910819	0.00584694	0.021	0.33	0.0225498	0.333352	3971	0.0910819	0.00584694	0.022	0.323	0.0198078	0.338217	1.40656e-06	non-significant monotone/non-monotone	FALSE	TRUE	FALSE	FALSE	FALSE	TRUE	FALSE	FALSE
orfmeanFEWin22	3971	0.0924377	0.00738632	0.01	0.353	0.00701676	0.362751	3971	0.0924377	0.00738632	0.014	0.357	0.00851242	0.369211	5.82303e-08	non-significant monotone/non-monotone	TRUE	TRUE	FALSE	FALSE	TRUE	TRUE	FALSE	FALSE
orfmeanFEWin23	3971	0.0956462	0.00858687	0.00122581	0.172355	0.000454246	0.174077	3971	0.0956462	0.00858687	0.0010495	0.173941	0.000442214	0.173406	4.91157e-09	non-significant monotone/non-monotone	TRUE	TRUE	FALSE	FALSE	TRUE	TRUE	FALSE	FALSE
orfmeanFEWin24	3971	0.091527	0.00958633	0.019	0.678	0.0122714	0.704209	3971	0.091527	0.00958633	0.022	0.714	0.0203721	0.718294	6.29788e-10	non-significant monotone/non-monotone	TRUE	TRUE	FALSE	FALSE	TRUE	TRUE	FALSE	FALSE
orfmeanFEWin25	3971	0.0936242	0.0102783	0.008	0.542	0.00360055	0.55236	3971	0.0936242	0.0102783	0.008	0.52	0.0031271	0.543487	1.52189e-10	non-significant monotone/non-monotone	TRUE	TRUE	FALSE	FALSE	TRUE	TRUE	FALSE	FALSE
orfmeanFEWin26	3971	0.0928399	0.0107016	0.005	0.653	0.00411235	0.665362	3971	0.0928399	0.0107016	0.007	0.645	0.00509212	0.66416	6.38693e-11	non-significant monotone/non-monotone	TRUE	TRUE	FALSE	FALSE	TRUE	TRUE	FALSE	FALSE
orfmeanFEWin27	3971	0.0907481	0.0110764	0.033	0.881	0.026821	0.874171	3971	0.0907481	0.0110764	0.035	0.866	0.0275406	0.873336	2.96162e-11	non-significant monotone/non-monotone	FALSE	FALSE	FALSE	FALSE	FALSE	TRUE	FALSE	FALSE
orfmeanFEWin28	3971	0.089804	0.0116392	0.057	0.956	0.050013	0.953901	3971	0.089804	0.0116392	0.055	0.956	0.0453144	0.952737	9.34493e-12	MIC not significant	FALSE	FALSE	FALSE	FALSE	FALSE	FALSE	FALSE	FALSE
orfmeanFEWin29	3971	0.0930495	0.0123433	0.007	0.818	0.0047636	0.814105	3971	0.0930495	0.0123433	0.011	0.814	0.0053921	0.816816	2.20867e-12	non-significant monotone/non-monotone	TRUE	TRUE	FALSE	FALSE	TRUE	TRUE	FALSE	FALSE
orfmeanFEWin30	3971	0.0895087	0.0133024	0.058	0.99	0.0523513	0.986477	3971	0.0895087	0.0133024	0.054	0.991	0.0467543	0.984351	3.09811e-13	MIC not significant	FALSE	FALSE	FALSE	FALSE	FALSE	FALSE	FALSE	FALSE
orfmeanFEWin31	3971	0.0904266	0.0146137	0.036	0.998	0.0300094	0.987197	3971	0.0904266	0.0146137	0.037	0.987	0.0346655	0.98965	2.11467e-14	Monotone	FALSE	FALSE	FALSE	FALSE	FALSE	TRUE	FALSE	FALSE
orfmeanFEWin32	3971	0.0900023	0.0132952	0.036	0.983	0.0369558	0.980321	3971	0.0900023	0.0132952	0.043	0.991	0.0369166	0.981789	3.14457e-13	Monotone	FALSE	FALSE	FALSE	FALSE	FALSE	FALSE	FALSE	FALSE
orfmeanFEWin33	3971	0.0928491	0.0122828	0.018	0.824	0.00764277	0.814723	3971	0.0928491	0.0122828	0.016	0.814	0.00835874	0.802542	2.49996e-12	non-significant monotone/non-monotone	TRUE	TRUE	FALSE	FALSE	TRUE	TRUE	FALSE	FALSE
orfmeanFEWin34	3971	0.0977934	0.0128633	0.001	0.385	6.21076e-05	0.391787	3971	0.0977934	0.0128633	8.91089e-05	0.36202	4.09898e-05	0.371141	7.61375e-13	non-significant monotone/non-monotone	TRUE	TRUE	FALSE	FALSE	TRUE	TRUE	FALSE	FALSE
orfmeanFEWin35	3971	0.0921965	0.0115044	0.012	0.813	0.0081886	0.806957	3971	0.0921965	0.0115044	0.007	0.817	0.0067279	0.825546	1.23194e-11	non-significant monotone/non-monotone	TRUE	TRUE	FALSE	FALSE	TRUE	TRUE	FALSE	FALSE
orfmeanFEWin36	3971	0.0905098	0.0113552	0.042	0.913	0.0326133	0.908478	3971	0.0905098	0.0113552	0.031	0.915	0.0291556	0.907804	1.67237e-11	non-significant monotone/non-monotone	FALSE	TRUE	FALSE	FALSE	FALSE	TRUE	FALSE	FALSE
orfmeanFEWin37	3971	0.0919255	0.0115791	0.017	0.841	0.0123113	0.836116	3971	0.0919255	0.0115791	0.016	0.845	0.0115446	0.844335	1.05714e-11	non-significant monotone/non-monotone	TRUE	TRUE	FALSE	FALSE	TRUE	TRUE	FALSE	FALSE
orfmeanFEWin38	3971	0.0950538	0.0118197	0.001	0.55	0.000611104	0.555042	3971	0.0950538	0.0118197	0.002	0.554	0.000989113	0.57577	6.45688e-12	non-significant monotone/non-monotone	TRUE	TRUE	FALSE	FALSE	TRUE	TRUE	FALSE	FALSE
orfmeanFEWin39	3971	0.0903524	0.0131498	0.029	0.974	0.0310739	0.96763	3971	0.0903524	0.0131498	0.038	0.968	0.0270514	0.96912	4.23466e-13	Monotone	FALSE	FALSE	FALSE	FALSE	FALSE	TRUE	FALSE	FALSE
orfmeanFEWin40	3970	0.0923968	0.014854	0.015	0.972	0.00716665	0.962232	3970	0.0923968	0.014854	0.009	0.974	0.00816767	0.968519	1.30294e-14	Monotone	TRUE	TRUE	FALSE	TRUE	TRUE	TRUE	FALSE	TRUE
orfmeanFEWin41	3970	0.0875225	0.0131363	0.172	0.999	0.168894	0.996965	3970	0.0875225	0.0131363	0.162	0.997	0.163179	0.995641	4.38322e-13	MIC not significant	FALSE	FALSE	FALSE	FALSE	FALSE	FALSE	FALSE	FALSE
orfmeanFEWin42	3970	0.0938299	0.0129931	0.006	0.801	0.00320857	0.805033	3970	0.0938299	0.0129931	0.001	0.788	0.00273316	0.798716	5.87621e-13	non-significant monotone/non-monotone	TRUE	TRUE	FALSE	FALSE	TRUE	TRUE	FALSE	FALSE
orfmeanFEWin43	3970	0.0929848	0.0113282	0.011	0.709	0.00491964	0.733126	3970	0.0929848	0.0113282	0.005	0.702	0.00382362	0.712708	1.77806e-11	non-significant monotone/non-monotone	TRUE	TRUE	FALSE	FALSE	TRUE	TRUE	FALSE	FALSE
orfmeanFEWin44	3970	0.0877375	0.00933707	0.138	0.948	0.146453	0.940235	3970	0.0877375	0.00933707	0.137	0.936	0.13955	0.9337	1.05587e-09	MIC not significant	FALSE	FALSE	FALSE	FALSE	FALSE	FALSE	FALSE	FALSE
orfmeanFEWin45	3970	0.0869026	0.010008	0.202	0.967	0.211902	0.967793	3970	0.0869026	0.010008	0.184	0.984	0.189647	0.978189	2.66393e-10	MIC not significant	FALSE	FALSE	FALSE	FALSE	FALSE	FALSE	FALSE	FALSE
orfmeanFEWin46	3970	0.0865628	0.00916957	0.226	0.973	0.235513	0.969371	3970	0.0865628	0.00916957	0.255	0.981	0.260287	0.971645	1.48946e-09	MIC not significant	FALSE	FALSE	FALSE	FALSE	FALSE	FALSE	FALSE	FALSE
orfmeanFEWin47	3970	0.0840881	0.00888788	0.461	0.996	0.477734	0.991919	3970	0.0840881	0.00888788	0.48	0.992	0.477545	0.991053	2.65704e-09	MIC not significant	FALSE	FALSE	FALSE	FALSE	FALSE	FALSE	FALSE	FALSE
orfmeanFEWin48	3970	0.0852529	0.0081001	0.366	0.973	0.353441	0.974038	3970	0.0852529	0.0081001	0.344	0.977	0.345216	0.96811	1.34307e-08	MIC not significant	FALSE	FALSE	FALSE	FALSE	FALSE	FALSE	FALSE	FALSE
orfmeanFEWin49	3970	0.0855924	0.00917055	0.314	0.989	0.324201	0.9797	3970	0.0855924	0.00917055	0.313	0.987	0.320736	0.983621	1.48646e-09	MIC not significant	FALSE	FALSE	FALSE	FALSE	FALSE	FALSE	FALSE	FALSE
orfmeanFEWin50	3970	0.0889581	0.00826055	0.079	0.81	0.075141	0.810564	3970	0.0889581	0.00826055	0.08	0.802	0.0774021	0.809843	9.65334e-09	MIC not significant	FALSE	FALSE	FALSE	FALSE	FALSE	FALSE	FALSE	FALSE
orfmeanFEWin51	3970	0.0866147	0.00823946	0.246	0.944	0.253065	0.934763	3970	0.0866147	0.00823946	0.211	0.942	0.226024	0.946098	1.00814e-08	MIC not significant	FALSE	FALSE	FALSE	FALSE	FALSE	FALSE	FALSE	FALSE
orfmeanFEWin52	3970	0.0875991	0.00871677	0.155	0.921	0.145837	0.911629	3970	0.0875991	0.00871677	0.165	0.923	0.170152	0.916627	3.77701e-09	MIC not significant	FALSE	FALSE	FALSE	FALSE	FALSE	FALSE	FALSE	FALSE
orfmeanFEWin53	3970	0.0874045	0.00643711	0.175	0.78	0.168483	0.786919	3970	0.0874045	0.00643711	0.153	0.796	0.160567	0.792758	4.15325e-07	MIC not significant	FALSE	FALSE	FALSE	FALSE	FALSE	FALSE	FALSE	FALSE
orfmeanFEWin54	3970	0.0842992	0.00453175	0.479	0.88	0.48265	0.878728	3970	0.0842992	0.00453175	0.47	0.877	0.47298	0.873074	2.18528e-05	MIC not significant	FALSE	FALSE	FALSE	FALSE	FALSE	FALSE	FALSE	FALSE
orfmeanFEWin55	3970	0.0857785	0.00393571	0.296	0.703	0.301857	0.694058	3970	0.0857785	0.00393571	0.3	0.733	0.31575	0.724854	7.63842e-05	MIC not significant	FALSE	FALSE	FALSE	FALSE	FALSE	FALSE	FALSE	FALSE
orfmeanFEWin56	3970	0.0828219	0.00331434	0.611	0.881	0.624557	0.877632	3970	0.0828219	0.00331434	0.637	0.89	0.643082	0.891371	0.00028424	MIC not significant	FALSE	FALSE	FALSE	FALSE	FALSE	FALSE	FALSE	FALSE
orfmeanFEWin57	3970	0.0840603	0.00351689	0.485	0.819	0.499789	0.822124	3970	0.0840603	0.00351689	0.504	0.834	0.51452	0.833344	0.000184977	MIC not significant	FALSE	FALSE	FALSE	FALSE	FALSE	FALSE	FALSE	FALSE
orfmeanFEWin58	3970	0.0820461	0.00352007	0.695	0.941	0.70111	0.931097	3970	0.0820461	0.00352007	0.683	0.942	0.699865	0.928956	0.000183736	MIC not significant	FALSE	FALSE	FALSE	FALSE	FALSE	FALSE	FALSE	FALSE
orfmeanFEWin59	3970	0.0829236	0.00370242	0.612	0.911	0.623084	0.904028	3970	0.0829236	0.00370242	0.639	0.913	0.643449	0.911432	0.000124941	MIC not significant	FALSE	FALSE	FALSE	FALSE	FALSE	FALSE	FALSE	FALSE
orfmeanFEWin60	3970	0.083419	0.00355982	0.547	0.87	0.559528	0.863585	3970	0.083419	0.00355982	0.569	0.861	0.57943	0.872525	0.000168907	MIC not significant	FALSE	FALSE	FALSE	FALSE	FALSE	FALSE	FALSE	FALSE
orfmeanFEWin61	3970	0.0834432	0.00377244	0.583	0.899	0.574304	0.892664	3970	0.0834432	0.00377244	0.544	0.883	0.572655	0.880709	0.00010777	MIC not significant	FALSE	FALSE	FALSE	FALSE	FALSE	FALSE	FALSE	FALSE
orfmeanFEWin62	3970	0.0784927	0.00378517	0.946	1	0.944122	0.995363	3970	0.0784927	0.00378517	0.948	0.998	0.94502	0.995659	0.000104913	MIC not significant	FALSE	FALSE	FALSE	FALSE	FALSE	FALSE	FALSE	FALSE
orfmeanFEWin63	3970	0.0832168	0.00423453	0.582	0.916	0.589366	0.910972	3970	0.0832168	0.00423453	0.566	0.916	0.574153	0.906944	4.0749e-05	MIC not significant	FALSE	FALSE	FALSE	FALSE	FALSE	FALSE	FALSE	FALSE
orfmeanFEWin64	3970	0.0839772	0.00424434	0.485	0.888	0.509342	0.879476	3970	0.0839772	0.00424434	0.496	0.874	0.512449	0.876514	3.99188e-05	MIC not significant	FALSE	FALSE	FALSE	FALSE	FALSE	FALSE	FALSE	FALSE
orfmeanFEWin65	3970	0.0855502	0.00505543	0.307	0.829	0.32152	0.822301	3970	0.0855502	0.00505543	0.339	0.82	0.350683	0.820039	7.31781e-06	MIC not significant	FALSE	FALSE	FALSE	FALSE	FALSE	FALSE	FALSE	FALSE
orfmeanFEWin66	3970	0.0840375	0.00591785	0.502	0.954	0.511661	0.946762	3970	0.0840375	0.00591785	0.495	0.946	0.506575	0.945699	1.21784e-06	MIC not significant	FALSE	FALSE	FALSE	FALSE	FALSE	FALSE	FALSE	FALSE
orfmeanFEWin67	3970	0.0834309	0.00588482	0.536	0.965	0.552955	0.963673	3970	0.0834309	0.00588482	0.532	0.953	0.547949	0.955365	1.3042e-06	MIC not significant	FALSE	FALSE	FALSE	FALSE	FALSE	FALSE	FALSE	FALSE
orfmeanFEWin68	3970	0.0808416	0.00591014	0.819	0.996	0.816721	0.993974	3970	0.0808416	0.00591014	0.804	0.998	0.819824	0.993604	1.23748e-06	MIC not significant	FALSE	FALSE	FALSE	FALSE	FALSE	FALSE	FALSE	FALSE
orfmeanFEWin69	3970	0.0819663	0.00489841	0.689	0.975	0.696074	0.968633	3970	0.0819663	0.00489841	0.703	0.977	0.719587	0.971061	1.01543e-05	MIC not significant	FALSE	FALSE	FALSE	FALSE	FALSE	FALSE	FALSE	FALSE
orfmeanFEWin70	3970	0.0857032	0.00460516	0.323	0.776	0.319665	0.789268	3970	0.0857032	0.00460516	0.309	0.772	0.316248	0.774766	1.87409e-05	MIC not significant	FALSE	FALSE	FALSE	FALSE	FALSE	FALSE	FALSE	FALSE
orfmeanFEWin71	3970	0.0807815	0.00468845	0.813	0.99	0.82115	0.985374	3970	0.0807815	0.00468845	0.837	0.991	0.833051	0.987688	1.57446e-05	MIC not significant	FALSE	FALSE	FALSE	FALSE	FALSE	FALSE	FALSE	FALSE
orfmeanFEWin72	3970	0.0789994	0.00447991	0.932	0.996	0.924307	0.99557	3970	0.0789994	0.00447991	0.933	0.997	0.932894	0.996915	2.43588e-05	MIC not significant	FALSE	FALSE	FALSE	FALSE	FALSE	FALSE	FALSE	FALSE
orfmeanFEWin73	3968	0.0804447	0.00492738	0.859	0.997	0.858631	0.992762	3968	0.0804447	0.00492738	0.87	0.993	0.855076	0.992424	9.6079e-06	MIC not significant	FALSE	FALSE	FALSE	FALSE	FALSE	FALSE	FALSE	FALSE
orfmeanFEWin74	3968	0.0848916	0.00609275	0.399	0.941	0.411093	0.936401	3968	0.0848916	0.00609275	0.442	0.934	0.431459	0.929387	8.52808e-07	MIC not significant	FALSE	FALSE	FALSE	FALSE	FALSE	FALSE	FALSE	FALSE
orfmeanFEWin75	3968	0.0868599	0.00624405	0.226	0.819	0.226709	0.821142	3968	0.0868599	0.00624405	0.203	0.812	0.203435	0.807265	6.23432e-07	MIC not significant	FALSE	FALSE	FALSE	FALSE	FALSE	FALSE	FALSE	FALSE
orfmeanFEWin76	3968	0.0860057	0.00588758	0.264	0.839	0.284647	0.845642	3968	0.0860057	0.00588758	0.304	0.864	0.314628	0.861726	1.30475e-06	MIC not significant	FALSE	FALSE	FALSE	FALSE	FALSE	FALSE	FALSE	FALSE
orfmeanFEWin77	3968	0.0916057	0.00615717	0.024	0.326	0.0180285	0.346201	3968	0.0916057	0.00615717	0.014	0.301	0.0153901	0.315038	7.46297e-07	non-significant monotone/non-monotone	FALSE	TRUE	FALSE	FALSE	TRUE	TRUE	FALSE	FALSE
orfmeanFEWin78	3968	0.0923663	0.00655624	0.015	0.272	0.00850955	0.285832	3968	0.0923663	0.00655624	0.014	0.291	0.0102469	0.292065	3.26819e-07	non-significant monotone/non-monotone	TRUE	TRUE	FALSE	FALSE	TRUE	TRUE	FALSE	FALSE
orfmeanFEWin79	3967	0.0912335	0.00705983	0.023	0.478	0.0227817	0.475481	3967	0.0912335	0.00705983	0.028	0.44	0.0196129	0.46992	1.15925e-07	non-significant monotone/non-monotone	FALSE	TRUE	FALSE	FALSE	FALSE	TRUE	FALSE	FALSE
orfmeanFEWin80	3967	0.0895454	0.00745214	0.054	0.684	0.0496341	0.695352	3967	0.0895454	0.00745214	0.063	0.684	0.0632875	0.687476	5.1629e-08	MIC not significant	FALSE	FALSE	FALSE	FALSE	FALSE	FALSE	FALSE	FALSE
orfmeanFEWin81	3967	0.0910765	0.00819851	0.016	0.592	0.0207947	0.608341	3967	0.0910765	0.00819851	0.027	0.612	0.0250145	0.610406	1.11082e-08	non-significant monotone/non-monotone	TRUE	TRUE	FALSE	FALSE	TRUE	TRUE	FALSE	FALSE
orfmeanFEWin82	3967	0.0874454	0.00783449	0.167	0.901	0.160776	0.891038	3967	0.0874454	0.00783449	0.167	0.884	0.1691	0.876343	2.34917e-08	MIC not significant	FALSE	FALSE	FALSE	FALSE	FALSE	FALSE	FALSE	FALSE
orfmeanFEWin83	3967	0.0853168	0.00734553	0.371	0.961	0.380709	0.951175	3967	0.0853168	0.00734553	0.321	0.959	0.324141	0.956032	6.43151e-08	MIC not significant	FALSE	FALSE	FALSE	FALSE	FALSE	FALSE	FALSE	FALSE
orfmeanFEWin84	3967	0.084753	0.00579277	0.4	0.933	0.421843	0.920467	3967	0.084753	0.00579277	0.386	0.926	0.403713	0.925138	1.5931e-06	MIC not significant	FALSE	FALSE	FALSE	FALSE	FALSE	FALSE	FALSE	FALSE
orfmeanFEWin85	3967	0.0883344	0.00493966	0.124	0.544	0.125434	0.561428	3967	0.0883344	0.00493966	0.121	0.53	0.116234	0.554696	9.38935e-06	MIC not significant	FALSE	FALSE	FALSE	FALSE	FALSE	FALSE	FALSE	FALSE
orfmeanFEWin86	3967	0.0895249	0.00515098	0.072	0.435	0.0664746	0.438876	3967	0.0895249	0.00515098	0.073	0.407	0.0612252	0.446079	6.04519e-06	MIC not significant	FALSE	FALSE	FALSE	FALSE	FALSE	FALSE	FALSE	FALSE
orfmeanFEWin87	3967	0.0875627	0.00496628	0.149	0.611	0.143013	0.622663	3967	0.0875627	0.00496628	0.155	0.648	0.155268	0.649621	8.88239e-06	MIC not significant	FALSE	FALSE	FALSE	FALSE	FALSE	FALSE	FALSE	FALSE
orfmeanFEWin88	3967	0.0917386	0.00546924	0.016	0.243	0.013533	0.245544	3967	0.0917386	0.00546924	0.017	0.242	0.0137803	0.244555	3.11834e-06	non-significant monotone/non-monotone	TRUE	TRUE	FALSE	FALSE	TRUE	TRUE	FALSE	FALSE
orfmeanFEWin89	3967	0.0914692	0.00629963	0.025	0.315	0.0163943	0.337321	3967	0.0914692	0.00629963	0.018	0.325	0.0141984	0.333365	5.57505e-07	non-significant monotone/non-monotone	FALSE	TRUE	FALSE	FALSE	TRUE	TRUE	FALSE	FALSE
orfmeanFEWin90	3967	0.089471	0.00558822	0.07	0.491	0.0662511	0.503681	3967	0.089471	0.00558822	0.061	0.475	0.0575266	0.486768	2.43555e-06	MIC not significant	FALSE	FALSE	FALSE	FALSE	FALSE	FALSE	FALSE	FALSE
orfmeanFEWin91	3967	0.0898608	0.00530939	0.054	0.402	0.0432356	0.400711	3967	0.0898608	0.00530939	0.046	0.384	0.0422983	0.396193	4.34756e-06	MIC not significant	FALSE	FALSE	FALSE	FALSE	FALSE	FALSE	FALSE	FALSE
orfmeanFEWin92	3967	0.0898797	0.00519734	0.056	0.398	0.0542494	0.409549	3967	0.0898797	0.00519734	0.042	0.402	0.0438221	0.399341	5.48904e-06	MIC not significant	FALSE	FALSE	FALSE	FALSE	FALSE	FALSE	FALSE	FALSE
orfmeanFEWin93	3967	0.0931652	0.00520986	0.008	0.122	0.00509658	0.128844	3967	0.0931652	0.00520986	0.008	0.105	0.00435739	0.111614	5.3479e-06	non-significant monotone/non-monotone	TRUE	TRUE	FALSE	FALSE	TRUE	TRUE	FALSE	FALSE
orfmeanFEWin94	3967	0.0917372	0.00495184	0.015	0.177	0.0117296	0.18441	3967	0.0917372	0.00495184	0.013	0.205	0.011586	0.188466	9.15383e-06	non-significant monotone/non-monotone	TRUE	TRUE	FALSE	FALSE	TRUE	TRUE	FALSE	FALSE
orfmeanFEWin95	3967	0.0921016	0.00410123	0.014	0.111	0.00941773	0.114243	3967	0.0921016	0.00410123	0.009	0.118	0.00788563	0.10307	5.42706e-05	non-significant monotone/non-monotone	TRUE	TRUE	FALSE	FALSE	TRUE	TRUE	FALSE	FALSE
orfmeanFEWin96	3967	0.0923603	0.0039709	0.009	0.104	0.0080222	0.0889785	3967	0.0923603	0.0039709	0.01	0.081	0.00609248	0.0811912	7.13781e-05	non-significant monotone/non-monotone	TRUE	TRUE	FALSE	FALSE	TRUE	TRUE	FALSE	FALSE
orfmeanFEWin97	3967	0.093555	0.00476319	0.004	0.056	0.00168097	0.0565966	3967	0.093555	0.00476319	0.005	0.086	0.00376642	0.0836734	1.35689e-05	non-significant monotone/non-monotone	TRUE	TRUE	FALSE	FALSE	TRUE	TRUE	FALSE	FALSE
orfmeanFEWin98	3967	0.0926058	0.0043776	0.01	0.102	0.00698926	0.101755	3967	0.0926058	0.0043776	0.01	0.1	0.00682905	0.101194	3.03929e-05	non-significant monotone/non-monotone	TRUE	TRUE	FALSE	FALSE	TRUE	TRUE	FALSE	FALSE
orfmeanFEWin99	3967	0.0933396	0.00521477	0.009	0.113	0.00535956	0.121724	3967	0.0933396	0.00521477	0.012	0.126	0.00545097	0.12223	5.29348e-06	non-significant monotone/non-monotone	TRUE	TRUE	FALSE	FALSE	TRUE	TRUE	FALSE	FALSE
orfmeanFEWin100	3967	0.0915453	0.00566809	0.024	0.259	0.0173313	0.281276	3967	0.0915453	0.00566809	0.021	0.28	0.0172962	0.278343	2.06342e-06	non-significant monotone/non-monotone	FALSE	TRUE	FALSE	FALSE	TRUE	TRUE	FALSE	FALSE
orftAIWin1	3971	0.0885021	0.00121166	0.203	0.295	0.21319	0.314943	3971	0.0885021	0.00121166	0.183	0.291	0.20192	0.305341	0.0282726	MIC not significant	FALSE	FALSE	FALSE	FALSE	FALSE	FALSE	FALSE	FALSE
orftAIWin2	3971	0.0957404	0.00491184	0.001	0.052	0.000471491	0.0435099	3971	0.0957404	0.00491184	0.001	0.037	0.000285022	0.0346725	9.84805e-06	Non-monotone	TRUE	TRUE	FALSE	FALSE	TRUE	TRUE	FALSE	FALSE
orftAIWin3	3971	0.0845262	0.00351798	0.661	0.951	0.678726	0.941141	3971	0.0845262	0.00351798	0.673	0.952	0.68634	0.941781	0.000184203	MIC not significant	FALSE	FALSE	FALSE	FALSE	FALSE	FALSE	FALSE	FALSE
orftAIWin4	3971	0.086877	0.00184029	0.331	0.529	0.344159	0.557439	3971	0.086877	0.00184029	0.348	0.558	0.36224	0.578144	0.00685757	MIC not significant	FALSE	FALSE	FALSE	FALSE	FALSE	FALSE	FALSE	FALSE
orftAIWin5	3971	0.0911116	0.00276468	0.046	0.186	0.0385817	0.18152	3971	0.0911116	0.00276468	0.057	0.198	0.0493939	0.199547	0.000917624	MIC not significant	FALSE	FALSE	FALSE	FALSE	FALSE	FALSE	FALSE	FALSE
orftAIWin6	3971	0.0848247	0.00221336	0.603	0.837	0.63096	0.838557	3971	0.0848247	0.00221336	0.659	0.861	0.673637	0.863454	0.00302311	MIC not significant	FALSE	FALSE	FALSE	FALSE	FALSE	FALSE	FALSE	FALSE
orftAIWin7	3971	0.0839132	0.00243962	0.76	0.916	0.7564	0.923792	3971	0.0839132	0.00243962	0.762	0.934	0.756524	0.926395	0.00184924	MIC not significant	FALSE	FALSE	FALSE	FALSE	FALSE	FALSE	FALSE	FALSE
orftAIWin8	3971	0.087805	0.00331955	0.26	0.658	0.262743	0.662541	3971	0.087805	0.00331955	0.273	0.662	0.281667	0.672867	0.000280616	MIC not significant	FALSE	FALSE	FALSE	FALSE	FALSE	FALSE	FALSE	FALSE
orftAIWin9	3971	0.0870512	0.00162397	0.328	0.531	0.363585	0.550524	3971	0.0870512	0.00162397	0.363	0.518	0.365979	0.544218	0.0110955	MIC not significant	FALSE	FALSE	FALSE	FALSE	FALSE	FALSE	FALSE	FALSE
orftAIWin10	3971	0.0863398	0.00363885	0.426	0.824	0.429675	0.836038	3971	0.0863398	0.00363885	0.417	0.865	0.445077	0.857903	0.000142629	MIC not significant	FALSE	FALSE	FALSE	FALSE	FALSE	FALSE	FALSE	FALSE
orftAIWin11	3971	0.0919264	0.00390691	0.033	0.217	0.0238841	0.225642	3971	0.0919264	0.00390691	0.028	0.23	0.0231218	0.227185	8.0995e-05	non-significant monotone/non-monotone	FALSE	TRUE	FALSE	FALSE	FALSE	TRUE	FALSE	FALSE
orftAIWin12	3971	0.0839323	0.00205091	0.76	0.927	0.762536	0.908107	3971	0.0839323	0.00205091	0.758	0.902	0.756765	0.902184	0.00431228	MIC not significant	FALSE	FALSE	FALSE	FALSE	FALSE	FALSE	FALSE	FALSE
orftAIWin13	3971	0.086677	0.0034812	0.377	0.795	0.401198	0.801761	3971	0.086677	0.0034812	0.4	0.797	0.41229	0.801871	0.000199133	MIC not significant	FALSE	FALSE	FALSE	FALSE	FALSE	FALSE	FALSE	FALSE
orftAIWin14	3971	0.0917921	0.00494802	0.036	0.329	0.0273307	0.360939	3971	0.0917921	0.00494802	0.027	0.329	0.0219383	0.336375	9.13165e-06	non-significant monotone/non-monotone	FALSE	TRUE	FALSE	FALSE	FALSE	TRUE	FALSE	FALSE
orftAIWin15	3971	0.0928706	0.00214366	0.021	0.062	0.012787	0.0511184	3971	0.0928706	0.00214366	0.013	0.055	0.010992	0.0475441	0.00351993	non-significant monotone/non-monotone	FALSE	TRUE	FALSE	FALSE	TRUE	TRUE	FALSE	FALSE
orftAIWin16	3971	0.088264	0.00394152	0.228	0.67	0.231058	0.679287	3971	0.088264	0.00394152	0.238	0.66	0.218258	0.671091	7.52988e-05	MIC not significant	FALSE	FALSE	FALSE	FALSE	FALSE	FALSE	FALSE	FALSE
orftAIWin17	3971	0.0931285	0.00468766	0.019	0.171	0.00773746	0.173384	3971	0.0931285	0.00468766	0.011	0.171	0.00734752	0.170162	1.57316e-05	non-significant monotone/non-monotone	TRUE	TRUE	FALSE	FALSE	TRUE	TRUE	FALSE	FALSE
orftAIWin18	3971	0.0869231	0.00277616	0.363	0.703	0.372845	0.709089	3971	0.0869231	0.00277616	0.362	0.703	0.384966	0.703638	0.000895271	MIC not significant	FALSE	FALSE	FALSE	FALSE	FALSE	FALSE	FALSE	FALSE
orftAIWin19	3971	0.087912	0.00450562	0.276	0.81	0.275379	0.802761	3971	0.087912	0.00450562	0.249	0.784	0.256471	0.784193	2.30272e-05	MIC not significant	FALSE	FALSE	FALSE	FALSE	FALSE	FALSE	FALSE	FALSE
orftAIWin20	3971	0.087093	0.00503825	0.365	0.914	0.378495	0.904886	3971	0.087093	0.00503825	0.343	0.899	0.358006	0.894706	7.56476e-06	MIC not significant	FALSE	FALSE	FALSE	FALSE	FALSE	FALSE	FALSE	FALSE
orftAIWin21	3971	0.0839044	0.00279558	0.742	0.956	0.768962	0.943844	3971	0.0839044	0.00279558	0.754	0.957	0.762757	0.94176	0.00085873	MIC not significant	FALSE	FALSE	FALSE	FALSE	FALSE	FALSE	FALSE	FALSE
orftAIWin22	3971	0.0879418	0.00490346	0.279	0.813	0.282582	0.827248	3971	0.0879418	0.00490346	0.246	0.808	0.256877	0.807254	1.00219e-05	MIC not significant	FALSE	FALSE	FALSE	FALSE	FALSE	FALSE	FALSE	FALSE
orftAIWin23	3971	0.0864265	0.00692973	0.414	0.986	0.439682	0.978699	3971	0.0864265	0.00692973	0.435	0.989	0.443683	0.978759	1.49461e-07	MIC not significant	FALSE	FALSE	FALSE	FALSE	FALSE	FALSE	FALSE	FALSE
orftAIWin24	3971	0.0889529	0.00238047	0.166	0.389	0.167487	0.402024	3971	0.0889529	0.00238047	0.151	0.376	0.155907	0.378928	0.00210213	MIC not significant	FALSE	FALSE	FALSE	FALSE	FALSE	FALSE	FALSE	FALSE
orftAIWin25	3971	0.0887348	0.00623887	0.159	0.876	0.1696	0.866658	3971	0.0887348	0.00623887	0.172	0.88	0.176157	0.868235	6.24038e-07	MIC not significant	FALSE	FALSE	FALSE	FALSE	FALSE	FALSE	FALSE	FALSE
orftAIWin26	3971	0.0879174	0.00597112	0.249	0.885	0.258905	0.893544	3971	0.0879174	0.00597112	0.236	0.908	0.257864	0.895763	1.08707e-06	MIC not significant	FALSE	FALSE	FALSE	FALSE	FALSE	FALSE	FALSE	FALSE
orftAIWin27	3971	0.085637	0.00210255	0.523	0.745	0.545019	0.76574	3971	0.085637	0.00210255	0.52	0.75	0.530884	0.754827	0.003851	MIC not significant	FALSE	FALSE	FALSE	FALSE	FALSE	FALSE	FALSE	FALSE
orftAIWin28	3971	0.091276	0.00618963	0.052	0.536	0.0377178	0.562574	3971	0.091276	0.00618963	0.041	0.55	0.0375554	0.581279	6.91065e-07	MIC not significant	FALSE	FALSE	FALSE	FALSE	FALSE	FALSE	FALSE	FALSE
orftAIWin29	3971	0.0891572	0.00620525	0.135	0.823	0.138865	0.816772	3971	0.0891572	0.00620525	0.124	0.812	0.134663	0.821704	6.6906e-07	MIC not significant	FALSE	FALSE	FALSE	FALSE	FALSE	FALSE	FALSE	FALSE
orftAIWin30	3971	0.0906456	0.00214664	0.058	0.172	0.0523223	0.166456	3971	0.0906456	0.00214664	0.06	0.161	0.0539535	0.165617	0.00349702	MIC not significant	FALSE	FALSE	FALSE	FALSE	FALSE	FALSE	FALSE	FALSE
orftAIWin31	3971	0.0886653	0.00637972	0.184	0.884	0.184702	0.882036	3971	0.0886653	0.00637972	0.194	0.874	0.192298	0.877981	4.66153e-07	MIC not significant	FALSE	FALSE	FALSE	FALSE	FALSE	FALSE	FALSE	FALSE
orftAIWin32	3971	0.0897314	0.00570731	0.113	0.731	0.115188	0.730741	3971	0.0897314	0.00570731	0.101	0.708	0.0978479	0.712214	1.8796e-06	MIC not significant	FALSE	FALSE	FALSE	FALSE	FALSE	FALSE	FALSE	FALSE
orftAIWin33	3971	0.0844486	0.00131379	0.702	0.82	0.709659	0.816584	3971	0.0844486	0.00131379	0.675	0.801	0.689754	0.80256	0.0223644	MIC not significant	FALSE	FALSE	FALSE	FALSE	FALSE	FALSE	FALSE	FALSE
orftAIWin34	3971	0.0940983	0.00712981	0.008	0.317	0.00287601	0.333966	3971	0.0940983	0.00712981	0.002	0.309	0.00223432	0.315097	9.88691e-08	non-significant monotone/non-monotone	TRUE	TRUE	FALSE	FALSE	TRUE	TRUE	FALSE	FALSE
orftAIWin35	3971	0.0903066	0.00445353	0.076	0.458	0.0679695	0.477272	3971	0.0903066	0.00445353	0.077	0.478	0.0692151	0.483029	2.56824e-05	MIC not significant	FALSE	FALSE	FALSE	FALSE	FALSE	FALSE	FALSE	FALSE
orftAIWin36	3971	0.0839976	0.00101745	0.736	0.82	0.742624	0.820075	3971	0.0839976	0.00101745	0.741	0.809	0.748706	0.820297	0.0444384	MIC not significant	FALSE	FALSE	FALSE	FALSE	FALSE	FALSE	FALSE	FALSE
orftAIWin37	3971	0.0923774	0.00753261	0.018	0.6	0.013745	0.612318	3971	0.0923774	0.00753261	0.023	0.612	0.0154213	0.62264	4.30637e-08	non-significant monotone/non-monotone	TRUE	TRUE	FALSE	FALSE	TRUE	TRUE	FALSE	FALSE
orftAIWin38	3971	0.0931327	0.00582892	0.016	0.281	0.00790085	0.292246	3971	0.0931327	0.00582892	0.016	0.294	0.0091936	0.30244	1.46016e-06	non-significant monotone/non-monotone	TRUE	TRUE	FALSE	FALSE	TRUE	TRUE	FALSE	FALSE
orftAIWin39	3971	0.0830045	0.000894856	0.842	0.897	0.855101	0.902015	3971	0.0830045	0.000894856	0.845	0.887	0.847405	0.891735	0.0594441	MIC not significant	FALSE	FALSE	FALSE	FALSE	FALSE	FALSE	FALSE	FALSE
orftAIWin40	3971	0.0954449	0.00783556	0.002	0.261	0.000958971	0.275175	3971	0.0954449	0.00783556	0.004	0.245	0.000862791	0.267351	2.30631e-08	non-significant monotone/non-monotone	TRUE	TRUE	FALSE	FALSE	TRUE	TRUE	FALSE	FALSE
orftAIWin41	3970	0.0861376	0.00525929	0.467	0.967	0.481286	0.951633	3970	0.0861376	0.00525929	0.448	0.969	0.475064	0.953704	4.78547e-06	MIC not significant	FALSE	FALSE	FALSE	FALSE	FALSE	FALSE	FALSE	FALSE
orftAIWin42	3970	0.0811318	0.000813071	0.957	0.97	0.949294	0.965212	3970	0.0811318	0.000813071	0.962	0.978	0.951595	0.96752	0.0724257	MIC not significant	FALSE	FALSE	FALSE	FALSE	FALSE	FALSE	FALSE	FALSE
orftAIWin43	3970	0.0954368	0.0089599	0.004	0.384	0.000591958	0.401583	3970	0.0954368	0.0089599	0.001	0.387	0.000470106	0.400806	2.2915e-09	non-significant monotone/non-monotone	TRUE	TRUE	FALSE	FALSE	TRUE	TRUE	FALSE	FALSE
orftAIWin44	3970	0.089436	0.0057612	0.124	0.772	0.137398	0.769948	3970	0.089436	0.0057612	0.142	0.764	0.13962	0.771102	1.68566e-06	MIC not significant	FALSE	FALSE	FALSE	FALSE	FALSE	FALSE	FALSE	FALSE
orftAIWin45	3970	0.0870121	0.000481969	0.362	0.394	0.379224	0.408243	3970	0.0870121	0.000481969	0.354	0.377	0.358412	0.388679	0.166666	MIC not significant	FALSE	FALSE	FALSE	FALSE	FALSE	FALSE	FALSE	FALSE
orftAIWin46	3970	0.101649	0.00800263	0	0.00814851	8.67863e-08	0.00418432	3970	0.101649	0.00800263	1.9802e-05	0.00774257	7.44547e-08	0.00397407	1.64152e-08	Non-monotone	TRUE	TRUE	FALSE	FALSE	TRUE	TRUE	FALSE	FALSE
orftAIWin47	3970	0.0863489	0.00603335	0.431	0.981	0.443466	0.97034	3970	0.0863489	0.00603335	0.433	0.971	0.442558	0.959117	9.58462e-07	MIC not significant	FALSE	FALSE	FALSE	FALSE	FALSE	FALSE	FALSE	FALSE
orftAIWin48	3970	0.0825971	0.000551104	0.872	0.883	0.8733	0.89046	3970	0.0825971	0.000551104	0.894	0.911	0.879265	0.89816	0.139171	MIC not significant	FALSE	FALSE	FALSE	FALSE	FALSE	FALSE	FALSE	FALSE
orftAIWin49	3970	0.100279	0.00853366	2.9703e-05	0.0281584	7.84023e-07	0.0216147	3970	0.100279	0.00853366	4.9505e-05	0.0283069	7.75123e-07	0.0217363	5.50389e-09	Non-monotone	TRUE	TRUE	FALSE	FALSE	TRUE	TRUE	FALSE	FALSE
orftAIWin50	3970	0.0830116	0.00403739	0.843	0.993	0.842828	0.988079	3970	0.0830116	0.00403739	0.846	0.995	0.850436	0.98973	6.16661e-05	MIC not significant	FALSE	FALSE	FALSE	FALSE	FALSE	FALSE	FALSE	FALSE
orftAIWin51	3970	0.0849445	0.000362424	0.645	0.66	0.642074	0.657389	3970	0.0849445	0.000362424	0.636	0.65	0.631634	0.645	0.230434	MIC not significant	FALSE	FALSE	FALSE	FALSE	FALSE	FALSE	FALSE	FALSE
orftAIWin52	3970	0.094205	0.00866873	0.006	0.5	0.00222421	0.509966	3970	0.094205	0.00866873	0.004	0.501	0.00197601	0.516107	4.16914e-09	non-significant monotone/non-monotone	TRUE	TRUE	FALSE	FALSE	TRUE	TRUE	FALSE	FALSE
orftAIWin53	3970	0.0826218	0.0029658	0.879	0.983	0.870537	0.978951	3970	0.0826218	0.0029658	0.871	0.983	0.871368	0.977783	0.000597325	MIC not significant	FALSE	FALSE	FALSE	FALSE	FALSE	FALSE	FALSE	FALSE
orftAIWin54	3970	0.0840174	6.37179e-05	0.761	0.741	0.76672	0.746776	3970	0.0840174	6.37179e-05	0.722	0.7	0.729982	0.710956	0.615104	MIC not significant	FALSE	FALSE	FALSE	FALSE	FALSE	FALSE	FALSE	FALSE
orftAIWin55	3970	0.0915522	0.00774263	0.037	0.739	0.0373786	0.750703	3970	0.0915522	0.00774263	0.053	0.746	0.0445291	0.754219	2.80429e-08	MIC not significant	FALSE	FALSE	FALSE	FALSE	FALSE	FALSE	FALSE	FALSE
orftAIWin56	3970	0.087023	0.00201405	0.34	0.576	0.367564	0.597989	3970	0.087023	0.00201405	0.358	0.595	0.36446	0.598181	0.00468084	MIC not significant	FALSE	FALSE	FALSE	FALSE	FALSE	FALSE	FALSE	FALSE
orftAIWin57	3970	0.0868128	0.000164572	0.369	0.357	0.390472	0.376693	3970	0.0868128	0.000164572	0.36	0.357	0.381047	0.371414	0.419044	MIC not significant	FALSE	FALSE	FALSE	FALSE	FALSE	FALSE	FALSE	FALSE
orftAIWin58	3970	0.0909139	0.00815952	0.062	0.838	0.0577945	0.842302	3970	0.0909139	0.00815952	0.06	0.828	0.0469066	0.826644	1.18845e-08	MIC not significant	FALSE	FALSE	FALSE	FALSE	FALSE	FALSE	FALSE	FALSE
orftAIWin59	3970	0.0848177	0.00175814	0.631	0.821	0.644234	0.813411	3970	0.0848177	0.00175814	0.664	0.841	0.671172	0.833063	0.00823546	MIC not significant	FALSE	FALSE	FALSE	FALSE	FALSE	FALSE	FALSE	FALSE
orftAIWin60	3970	0.0905127	0.000173232	0.065	0.06	0.0662648	0.0636749	3970	0.0905127	0.000173232	0.064	0.065	0.062635	0.0592994	0.407065	MIC not significant	FALSE	FALSE	FALSE	FALSE	FALSE	FALSE	FALSE	FALSE
orftAIWin61	3970	0.0878711	0.00665598	0.242	0.939	0.251616	0.92768	3970	0.0878711	0.00665598	0.26	0.935	0.262753	0.924418	2.64103e-07	MIC not significant	FALSE	FALSE	FALSE	FALSE	FALSE	FALSE	FALSE	FALSE
orftAIWin62	3970	0.0818762	0.0015866	0.925	0.972	0.924099	0.971658	3970	0.0818762	0.0015866	0.92	0.975	0.920644	0.967704	0.0120749	MIC not significant	FALSE	FALSE	FALSE	FALSE	FALSE	FALSE	FALSE	FALSE
orftAIWin63	3970	0.0877575	0.000235118	0.263	0.263	0.276035	0.274914	3970	0.0877575	0.000235118	0.266	0.265	0.276885	0.27376	0.3341	MIC not significant	FALSE	FALSE	FALSE	FALSE	FALSE	FALSE	FALSE	FALSE
orftAIWin64	3970	0.0928659	0.00717124	0.016	0.464	0.0102649	0.500755	3970	0.0928659	0.00717124	0.012	0.483	0.00937347	0.496402	9.11023e-08	non-significant monotone/non-monotone	TRUE	TRUE	FALSE	FALSE	TRUE	TRUE	FALSE	FALSE
orftAIWin65	3970	0.0863122	0.00156396	0.441	0.617	0.464021	0.632251	3970	0.0863122	0.00156396	0.42	0.591	0.438664	0.610767	0.012704	MIC not significant	FALSE	FALSE	FALSE	FALSE	FALSE	FALSE	FALSE	FALSE
orftAIWin66	3970	0.0877578	0.000289337	0.252	0.256	0.266799	0.270279	3970	0.0877578	0.000289337	0.251	0.262	0.275299	0.278988	0.283945	MIC not significant	FALSE	FALSE	FALSE	FALSE	FALSE	FALSE	FALSE	FALSE
orftAIWin67	3970	0.0897906	0.00627188	0.123	0.77	0.119945	0.779164	3970	0.0897906	0.00627188	0.097	0.774	0.103716	0.778808	5.847e-07	MIC not significant	FALSE	FALSE	FALSE	FALSE	FALSE	FALSE	FALSE	FALSE
orftAIWin68	3970	0.0846891	0.00179676	0.653	0.81	0.663209	0.829377	3970	0.0846891	0.00179676	0.663	0.833	0.661326	0.823432	0.00755918	MIC not significant	FALSE	FALSE	FALSE	FALSE	FALSE	FALSE	FALSE	FALSE
orftAIWin69	3970	0.0855279	9.00495e-05	0.52	0.502	0.554029	0.536316	3970	0.0855279	9.00495e-05	0.534	0.514	0.544772	0.523598	0.550016	MIC not significant	FALSE	FALSE	FALSE	FALSE	FALSE	FALSE	FALSE	FALSE
orftAIWin70	3970	0.0915138	0.00726644	0.035	0.676	0.0281531	0.679612	3970	0.0915138	0.00726644	0.044	0.694	0.031792	0.704467	7.48532e-08	non-significant monotone/non-monotone	FALSE	FALSE	FALSE	FALSE	FALSE	TRUE	FALSE	FALSE
orftAIWin71	3970	0.0883982	0.00132737	0.197	0.306	0.199363	0.319724	3970	0.0883982	0.00132737	0.192	0.296	0.202571	0.323709	0.021698	MIC not significant	FALSE	FALSE	FALSE	FALSE	FALSE	FALSE	FALSE	FALSE
orftAIWin72	3970	0.0846331	8.99176e-05	0.666	0.652	0.675989	0.659252	3970	0.0846331	8.99176e-05	0.68	0.662	0.693265	0.675301	0.550309	MIC not significant	FALSE	FALSE	FALSE	FALSE	FALSE	FALSE	FALSE	FALSE
orftAIWin73	3970	0.0952722	0.00797387	0.002	0.278	0.00113128	0.294426	3970	0.0952722	0.00797387	0.005	0.285	0.00135265	0.321167	1.74166e-08	non-significant monotone/non-monotone	TRUE	TRUE	FALSE	FALSE	TRUE	TRUE	FALSE	FALSE
orftAIWin74	3968	0.0889924	0.00126473	0.153	0.252	0.157068	0.253559	3968	0.0889924	0.00126473	0.166	0.248	0.159222	0.254479	0.0250782	MIC not significant	FALSE	FALSE	FALSE	FALSE	FALSE	FALSE	FALSE	FALSE
orftAIWin75	3968	0.08794	9.72301e-06	0.257	0.238	0.255424	0.232007	3968	0.08794	9.72301e-06	0.251	0.228	0.265345	0.239691	0.844329	MIC not significant	FALSE	FALSE	FALSE	FALSE	FALSE	FALSE	FALSE	FALSE
orftAIWin76	3968	0.0985293	0.00801126	0.000225806	0.0601935	1.32952e-05	0.0549312	3968	0.0985293	0.00801126	0.000138614	0.0627129	1.36603e-05	0.0559069	1.62602e-08	non-significant monotone/non-monotone	TRUE	TRUE	FALSE	FALSE	TRUE	TRUE	FALSE	FALSE
orftAIWin77	3968	0.0845161	0.000883177	0.689	0.761	0.692145	0.761623	3968	0.0845161	0.000883177	0.68	0.767	0.69826	0.768724	0.0612287	MIC not significant	FALSE	FALSE	FALSE	FALSE	FALSE	FALSE	FALSE	FALSE
orftAIWin78	3968	0.0894908	4.19152e-07	0.138	0.122	0.141385	0.122821	3968	0.0894908	4.19152e-07	0.13	0.113	0.119405	0.103593	0.96748	MIC not significant	FALSE	FALSE	FALSE	FALSE	FALSE	FALSE	FALSE	FALSE
orftAIWin79	3968	0.100702	0.010186	0	0.061505	4.13671e-07	0.055845	3968	0.100702	0.010186	0	0.0625743	4.1981e-07	0.0555144	1.86841e-10	non-significant monotone/non-monotone	TRUE	TRUE	FALSE	FALSE	TRUE	TRUE	FALSE	FALSE
orftAIWin80	3967	0.0882716	0.000616337	0.205	0.247	0.21341	0.251235	3967	0.0882716	0.000616337	0.231	0.267	0.237448	0.278657	0.117959	MIC not significant	FALSE	FALSE	FALSE	FALSE	FALSE	FALSE	FALSE	FALSE
orftAIWin81	3967	0.0846635	5.72227e-08	0.674	0.638	0.690409	0.660353	3967	0.0846635	5.72227e-08	0.677	0.643	0.687052	0.657763	0.987983	MIC not significant	FALSE	FALSE	FALSE	FALSE	FALSE	FALSE	FALSE	FALSE
orftAIWin82	3967	0.0983028	0.00973185	0.000225806	0.171935	1.96704e-05	0.176332	3967	0.0983028	0.00973185	0.002	0.172	2.67757e-05	0.185248	4.76582e-10	non-significant monotone/non-monotone	TRUE	TRUE	FALSE	FALSE	TRUE	TRUE	FALSE	FALSE
orftAIWin83	3967	0.0865638	0.000486884	0.426	0.453	0.438006	0.46925	3967	0.0865638	0.000486884	0.42	0.45	0.437516	0.469499	0.164679	MIC not significant	FALSE	FALSE	FALSE	FALSE	FALSE	FALSE	FALSE	FALSE
orftAIWin84	3967	0.0837435	2.66874e-05	0.785	0.76	0.793209	0.769924	3967	0.0837435	2.66874e-05	0.777	0.746	0.78157	0.757315	0.744973	MIC not significant	FALSE	FALSE	FALSE	FALSE	FALSE	FALSE	FALSE	FALSE
orftAIWin85	3967	0.0987074	0.0100216	9.67742e-05	0.162839	9.52277e-06	0.164749	3967	0.0987074	0.0100216	0.000128713	0.165525	1.22288e-05	0.168381	2.63091e-10	non-significant monotone/non-monotone	TRUE	TRUE	FALSE	FALSE	TRUE	TRUE	FALSE	FALSE
orftAIWin86	3967	0.0856319	0.00054265	0.551	0.589	0.555556	0.593573	3967	0.0856319	0.00054265	0.56	0.605	0.572279	0.610746	0.142392	MIC not significant	FALSE	FALSE	FALSE	FALSE	FALSE	FALSE	FALSE	FALSE
orftAIWin87	3967	0.0880279	2.4773e-06	0.25	0.226	0.27006	0.245174	3967	0.0880279	2.4773e-06	0.237	0.219	0.250337	0.224031	0.921057	MIC not significant	FALSE	FALSE	FALSE	FALSE	FALSE	FALSE	FALSE	FALSE
orftAIWin88	3967	0.0907191	0.0108196	0.077	0.979	0.0738713	0.971006	3967	0.0907191	0.0108196	0.058	0.985	0.0554898	0.975503	5.1276e-11	MIC not significant	FALSE	FALSE	FALSE	FALSE	FALSE	FALSE	FALSE	FALSE
orftAIWin89	3967	0.0861249	0.000555783	0.471	0.516	0.48936	0.531469	3967	0.0861249	0.000555783	0.481	0.514	0.493092	0.536362	0.137652	MIC not significant	FALSE	FALSE	FALSE	FALSE	FALSE	FALSE	FALSE	FALSE
orftAIWin90	3967	0.090074	2.80754e-05	0.095	0.084	0.0922848	0.0796543	3967	0.090074	2.80754e-05	0.098	0.085	0.0898676	0.0775819	0.738662	MIC not significant	FALSE	FALSE	FALSE	FALSE	FALSE	FALSE	FALSE	FALSE
orftAIWin91	3967	0.0976788	0.0112262	0.000322581	0.397161	4.98404e-05	0.415719	3967	0.0976788	0.0112262	0.001	0.395	7.62038e-05	0.417809	2.22979e-11	non-significant monotone/non-monotone	TRUE	TRUE	FALSE	FALSE	TRUE	TRUE	FALSE	FALSE
orftAIWin92	3967	0.0835019	0.000600648	0.794	0.835	0.806026	0.835842	3967	0.0835019	0.000600648	0.812	0.841	0.811646	0.843953	0.122742	MIC not significant	FALSE	FALSE	FALSE	FALSE	FALSE	FALSE	FALSE	FALSE
orftAIWin93	3967	0.0926391	5.7222e-06	0.02	0.019	0.0125606	0.0101118	3967	0.0926391	5.7222e-06	0.015	0.013	0.00971746	0.00755518	0.880277	Non-monotone	FALSE	TRUE	FALSE	FALSE	TRUE	TRUE	FALSE	FALSE
orftAIWin94	3967	0.0933448	0.011418	0.014	0.921	0.00701439	0.906061	3967	0.0933448	0.011418	0.016	0.902	0.00862052	0.896566	1.50531e-11	non-significant monotone/non-monotone	TRUE	TRUE	FALSE	FALSE	TRUE	TRUE	FALSE	FALSE
orftAIWin95	3967	0.0894545	0.000765776	0.122	0.152	0.118077	0.159051	3967	0.0894545	0.000765776	0.12	0.153	0.119936	0.158362	0.0813821	MIC not significant	FALSE	FALSE	FALSE	FALSE	FALSE	FALSE	FALSE	FALSE
orftAIWin96	3967	0.0913127	5.30379e-06	0.043	0.032	0.0420346	0.0358221	3967	0.0913127	5.30379e-06	0.047	0.04	0.0428545	0.0361451	0.884706	Non-monotone	FALSE	FALSE	FALSE	FALSE	FALSE	FALSE	FALSE	FALSE
orftAIWin97	3967	0.095683	0.010892	0.001	0.648	0.000762305	0.64583	3967	0.095683	0.010892	0.001	0.598	0.00108048	0.621842	4.42044e-11	non-significant monotone/non-monotone	TRUE	TRUE	FALSE	FALSE	TRUE	TRUE	FALSE	FALSE
orftAIWin98	3967	0.0918711	0.000409704	0.031	0.034	0.0193583	0.0221426	3967	0.0918711	0.000409704	0.026	0.032	0.0229691	0.0264602	0.202451	Non-monotone	FALSE	TRUE	FALSE	FALSE	TRUE	TRUE	FALSE	FALSE
orftAIWin99	3967	0.0896689	6.52602e-06	0.116	0.092	0.118946	0.102428	3967	0.0896689	6.52602e-06	0.132	0.116	0.118719	0.103675	0.872212	MIC not significant	FALSE	FALSE	FALSE	FALSE	FALSE	FALSE	FALSE	FALSE
orftAIWin100	3967	0.0933723	0.0123029	0.005	0.939	0.00463467	0.942239	3967	0.0933723	0.0123029	0.013	0.963	0.00677958	0.94992	2.46064e-12	Monotone	TRUE	TRUE	FALSE	FALSE	TRUE	TRUE	FALSE	FALSE
codonTTT	3971	0.109103	0.0336735	0	0.998574	2.82272e-14	0.99536	3951	0.106043	0.0303552	0	0.995614	3.85719e-12	0.990366	2.66582e-28	Monotone	TRUE	TRUE	FALSE	TRUE	TRUE	TRUE	FALSE	TRUE
codonTTC	3971	0.0886171	0.00180174	0.095	0.179	0.0925999	0.189814	3933	0.0883163	0.00106509	0.102	0.148	0.0931963	0.140901	0.0406976	MIC not significant	FALSE	FALSE	FALSE	FALSE	FALSE	FALSE	FALSE	FALSE
codonTTA	3971	0.121892	0.0609178	0	1	4.19775e-30	1	3962	0.122643	0.0624542	0	1	1.03122e-30	1	1.77341e-57	Monotone	TRUE	TRUE	FALSE	TRUE	TRUE	TRUE	FALSE	TRUE
codonTTG	3971	0.192245	0.18713	0	1	1.09649e-233	1	3899	0.175525	0.163189	0	1	1.02239e-163	1	5.48794e-153	Monotone	TRUE	TRUE	FALSE	TRUE	TRUE	TRUE	FALSE	TRUE
codonTCT	3971	0.142235	0.0782425	0	1	3.71628e-64	1	3804	0.11838	0.048266	0	1	1.57035e-21	0.999986	8.43264e-43	Monotone	TRUE	TRUE	FALSE	TRUE	TRUE	TRUE	FALSE	TRUE
codonTCC	3971	0.104906	0.0235787	0	0.756871	7.69185e-10	0.76344	3799	0.11301	0.0360682	0	0.992644	2.1757e-15	0.987654	3.48761e-32	Monotone	TRUE	TRUE	FALSE	TRUE	TRUE	TRUE	FALSE	TRUE
codonTCA	3971	0.142061	0.0830124	0	1	3.88044e-63	1	3471	0.103242	0.0198863	0.000108911	0.842802	1.25659e-05	0.842016	7.00776e-17	non-significant monotone/non-monotone	TRUE	TRUE	FALSE	FALSE	TRUE	TRUE	FALSE	FALSE
codonTCG	3971	0.100067	0.0076055	1.9802e-05	0.00910891	1.47583e-06	0.00574861	3907	0.102521	0.0103955	0	0.0125644	5.18752e-08	0.00881043	1.68504e-10	Non-monotone	TRUE	TRUE	FALSE	FALSE	TRUE	TRUE	FALSE	FALSE
codonTAT	3971	0.115421	0.0151669	0	0	1.10531e-20	6.26395e-07	3906	0.109139	0.0221954	0	0.195574	1.75848e-13	0.19718	7.94876e-21	non-significant monotone/non-monotone	TRUE	TRUE	FALSE	FALSE	TRUE	TRUE	FALSE	FALSE
codonTAC	3971	0.14435	0.103219	0	1	3.25388e-68	1	3594	0.118169	0.049765	0	1	4.37371e-19	0.999999	9.0787e-42	Monotone	TRUE	TRUE	FALSE	TRUE	TRUE	TRUE	FALSE	TRUE
codonTAA	3971	0.149958	0.0908283	0	1	4.56381e-81	1	3590	0.118071	0.0328452	0	0.545693	7.65887e-19	0.560494	6.95897e-28	non-significant monotone/non-monotone	TRUE	TRUE	FALSE	FALSE	TRUE	TRUE	FALSE	FALSE
codonTAG	3971	0.145028	0.0835149	0	1	1.54427e-70	1	3757	0.116835	0.0455394	0	0.99998	9.69314e-20	0.999923	6.00694e-40	Monotone	TRUE	TRUE	FALSE	TRUE	TRUE	TRUE	FALSE	TRUE
codonTGT	3971	0.207251	0.19432	0	1	7.73677e-286	1	3709	0.163364	0.126387	0	1	2.10251e-108	1	6.31346e-111	Monotone	TRUE	TRUE	FALSE	TRUE	TRUE	TRUE	FALSE	TRUE
codonTGC	3971	0.124455	0.0467415	0	0.971515	1.41957e-32	0.963165	3880	0.125427	0.057067	0	1	5.31944e-32	0.999998	1.76164e-51	Monotone	TRUE	TRUE	FALSE	TRUE	TRUE	TRUE	FALSE	TRUE
codonTGA	3971	0.0893922	0.000262447	0.072	0.069	0.0575029	0.0575148	3971	0.0893922	0.000262447	0.062	0.061	0.0582593	0.0595401	0.307436	MIC not significant	FALSE	FALSE	FALSE	FALSE	FALSE	FALSE	FALSE	FALSE
codonTGG	3971	0.0917595	0.00616707	0.015	0.272	0.0105905	0.289954	3927	0.090667	0.00855349	0.025	0.694	0.0256236	0.709823	6.38875e-09	non-significant monotone/non-monotone	TRUE	TRUE	FALSE	FALSE	TRUE	TRUE	FALSE	FALSE
codonCTT	3971	0.0861533	0.000884283	0.247	0.305	0.260949	0.326938	3947	0.0863836	0.00132996	0.192	0.302	0.213812	0.314668	0.021953	MIC not significant	FALSE	FALSE	FALSE	FALSE	FALSE	FALSE	FALSE	FALSE
codonCTC	3971	0.096433	0.00174271	0.001	0.003	0.000208801	0.000943215	3547	0.101728	0.00374788	0.001	0.003	2.8471e-05	0.000971989	0.000264088	Non-monotone	TRUE	TRUE	FALSE	FALSE	TRUE	TRUE	FALSE	FALSE
codonCTA	3971	0.133791	0.071635	0	1	1.03563e-47	1	3694	0.10656	0.0247295	0	0.875835	6.89131e-09	0.873259	6.95112e-22	non-significant monotone/non-monotone	TRUE	TRUE	FALSE	FALSE	TRUE	TRUE	FALSE	FALSE
codonCTG	3971	0.110512	0.0417783	0	1	6.88129e-15	0.999994	3764	0.0981573	0.0196976	0.000267327	0.96498	8.16604e-05	0.957245	5.12567e-18	Monotone	TRUE	TRUE	FALSE	FALSE	TRUE	TRUE	FALSE	FALSE
codonCCT	3971	0.109102	0.0180769	0	0.0227327	1.50501e-13	0.017956	3870	0.11222	0.0269251	0	0.414578	1.96096e-15	0.428392	9.20447e-25	non-significant monotone/non-monotone	TRUE	TRUE	FALSE	FALSE	TRUE	TRUE	FALSE	FALSE
codonCCC	3971	0.141454	0.109042	0	1	1.81286e-61	1	3409	0.107748	0.0301023	0	0.997512	5.04552e-08	0.994577	1.90548e-24	Monotone	TRUE	TRUE	FALSE	TRUE	TRUE	TRUE	FALSE	TRUE
codonCCA	3971	0.16789	0.141977	0	1	8.38926e-129	1	3064	0.10975	0.029087	2.47934e-05	0.995835	1.44269e-06	0.991618	1.97469e-21	Monotone	TRUE	TRUE	FALSE	TRUE	TRUE	TRUE	FALSE	TRUE
codonCCG	3971	0.105813	0.0229533	0	0.594713	1.33307e-10	0.607108	3773	0.0928316	0.0085088	0.016	0.519	0.013011	0.527949	1.37688e-08	non-significant monotone/non-monotone	TRUE	TRUE	FALSE	FALSE	TRUE	TRUE	FALSE	FALSE
codonCAT	3971	0.234986	0.1941	0	1	0	1	2303	0.0992939	0.00649165	0.6	0.948	0.618906	0.936545	0.0001085	MIC not significant	TRUE	FALSE	FALSE	FALSE	TRUE	FALSE	FALSE	FALSE
codonCAC	3971	0.143192	0.0676587	0	0.99396	6.28378e-65	0.990925	2406	0.102667	0.00799086	0.162	0.742	0.173178	0.752638	1.12695e-05	MIC not significant	TRUE	FALSE	FALSE	FALSE	TRUE	FALSE	FALSE	FALSE
codonCAA	3971	0.234445	0.133475	0	9.90099e-06	0	3.47582e-07	1800	0.108419	0.0087082	0.391	0.908	0.408641	0.895938	7.33837e-05	MIC not significant	TRUE	FALSE	FALSE	FALSE	TRUE	FALSE	FALSE	FALSE
codonCAG	3971	0.113099	0.0126697	0	9.90099e-06	2.71747e-17	7.84236e-07	3383	0.121956	0.0636301	0	1	4.62692e-19	1	2.92117e-50	Monotone	TRUE	TRUE	FALSE	TRUE	TRUE	TRUE	FALSE	TRUE
codonCGT	3971	0.107088	0.0243123	0	0.602188	1.30702e-11	0.614939	3804	0.0947787	0.0105457	0.002	0.549	0.00164135	0.571579	2.17527e-10	non-significant monotone/non-monotone	TRUE	TRUE	FALSE	FALSE	TRUE	TRUE	FALSE	FALSE
codonCGC	3971	0.147084	0.0999309	0	1	2.77827e-73	1	3133	0.0950908	0.00971292	0.111	0.865	0.110105	0.863975	3.24546e-08	MIC not significant	TRUE	FALSE	FALSE	FALSE	TRUE	FALSE	FALSE	FALSE
codonCGA	3971	0.133563	0.0636417	0	1	1.12662e-46	0.99997	3653	0.102231	0.0167055	3.9604e-05	0.496317	2.93834e-06	0.510873	4.43065e-15	non-significant monotone/non-monotone	TRUE	TRUE	FALSE	FALSE	TRUE	TRUE	FALSE	FALSE
codonCGG	3971	0.127575	0.073909	0	1	1.37232e-36	1	3697	0.100088	0.0335529	0.00017757	1	5.31439e-05	1	2.94054e-29	Monotone	TRUE	TRUE	FALSE	TRUE	TRUE	TRUE	FALSE	TRUE
codonATT	3971	0.101915	0.01334	0	0.0903861	4.1421e-08	0.0839417	3959	0.100651	0.0152262	1.9802e-05	0.345574	3.94263e-07	0.361304	6.62693e-15	non-significant monotone/non-monotone	TRUE	TRUE	FALSE	FALSE	TRUE	TRUE	FALSE	FALSE
codonATC	3971	0.0917615	0.00744506	0.015	0.43	0.0119677	0.440888	3898	0.0917248	0.0115842	0.022	0.899	0.012402	0.891189	1.61471e-11	non-significant monotone/non-monotone	TRUE	TRUE	FALSE	FALSE	TRUE	TRUE	FALSE	FALSE
codonATA	3971	0.115522	0.0204166	0	0.00112871	7.83205e-21	0.000439429	3847	0.0980085	0.00666233	0.00029703	0.0232871	3.46185e-05	0.0172854	3.99026e-07	Non-monotone	TRUE	TRUE	FALSE	FALSE	TRUE	TRUE	FALSE	FALSE
codonATG	3971	0.0975991	0.0101501	0.00016129	0.146484	2.79279e-05	0.145266	3944	0.0946106	0.00814748	0.002	0.177	0.000687919	0.189812	1.35919e-08	non-significant monotone/non-monotone	TRUE	TRUE	FALSE	FALSE	TRUE	TRUE	FALSE	FALSE
codonACT	3971	0.107218	0.00601805	0	9.90099e-06	8.45877e-12	2.08951e-07	3828	0.0924532	0.000111927	0.014	0.013	0.0119243	0.0103752	0.512874	Non-monotone	TRUE	TRUE	FALSE	FALSE	TRUE	TRUE	FALSE	FALSE
codonACC	3971	0.147268	0.103891	0	1	9.07682e-76	1	3796	0.15423	0.136218	0	1	2.18904e-86	1	7.99474e-123	Monotone	TRUE	TRUE	FALSE	TRUE	TRUE	TRUE	FALSE	TRUE
codonACA	3971	0.113933	0.0133982	0	9.90099e-06	4.37686e-18	7.34872e-07	3386	0.0957945	0.0038536	0.023	0.149	0.0209669	0.134448	0.000301052	non-significant monotone/non-monotone	TRUE	TRUE	FALSE	FALSE	TRUE	TRUE	FALSE	FALSE
codonACG	3971	0.183995	0.152701	0	1	2.98384e-193	1	3895	0.192435	0.165729	0	1	4.84482e-222	1	2.09527e-155	Monotone	TRUE	TRUE	FALSE	TRUE	TRUE	TRUE	FALSE	TRUE
codonAAT	3971	0.132114	0.0517019	0	0.835545	3.49002e-44	0.835446	3677	0.10013	0.0152556	9.90099e-05	0.515059	2.0082e-05	0.530612	5.65204e-14	non-significant monotone/non-monotone	TRUE	TRUE	FALSE	FALSE	TRUE	TRUE	FALSE	FALSE
codonAAC	3971	0.0979704	0.000190735	3.22581e-05	3.22581e-05	2.4939e-05	2.28303e-05	3722	0.0898013	0.00590352	0.123	0.632	0.120704	0.657512	2.69373e-06	MIC not significant	TRUE	FALSE	FALSE	FALSE	TRUE	FALSE	FALSE	FALSE
codonAAA	3971	0.114422	0.00962153	0	0	1.19639e-18	7.34296e-10	3393	0.0957255	0.00619226	0.024	0.283	0.0189508	0.300005	4.45091e-06	non-significant monotone/non-monotone	TRUE	TRUE	FALSE	FALSE	TRUE	TRUE	FALSE	FALSE
codonAAG	3971	0.215196	0.218645	0	1	0	1	3904	0.218118	0.231309	0	1	0	1	3.35643e-225	Monotone	TRUE	TRUE	FALSE	TRUE	TRUE	TRUE	FALSE	TRUE
codonAGT	3971	0.12533	0.0474383	0	0.964049	2.43039e-33	0.956622	3712	0.102732	0.0130606	1.9802e-05	0.12899	1.31837e-06	0.125666	2.88186e-12	non-significant monotone/non-monotone	TRUE	TRUE	FALSE	FALSE	TRUE	TRUE	FALSE	FALSE
codonAGC	3971	0.162542	0.0998277	0	1	1.49874e-114	1	3786	0.167305	0.136624	0	1	3.02183e-118	1	6.8324e-123	Monotone	TRUE	TRUE	FALSE	TRUE	TRUE	TRUE	FALSE	TRUE
codonAGA	3971	0.106431	0.00122394	0	0	5.23173e-11	3.18044e-10	3731	0.0926946	0.00491857	0.025	0.22	0.0195273	0.229003	1.80554e-05	non-significant monotone/non-monotone	TRUE	TRUE	FALSE	FALSE	TRUE	TRUE	FALSE	FALSE
codonAGG	3971	0.148539	0.0898081	0	1	1.03836e-80	1	3907	0.149763	0.0990172	0	1	5.17222e-82	1	1.55297e-90	Monotone	TRUE	TRUE	FALSE	TRUE	TRUE	TRUE	FALSE	TRUE
codonGTT	3971	0.106793	0.0266037	0	0.84704	2.9986e-11	0.846532	1899	0.199671	0.177421	0	1	5.8632e-62	1	1.52509e-82	Monotone	TRUE	TRUE	FALSE	TRUE	TRUE	TRUE	FALSE	TRUE
codonGTC	3971	0.10128	0.017308	0	0.467307	2.66654e-07	0.481157	3868	0.106594	0.0263574	0	0.902	2.56075e-10	0.898077	2.95193e-24	non-significant monotone/non-monotone	TRUE	TRUE	FALSE	FALSE	TRUE	TRUE	FALSE	FALSE
codonGTA	3971	0.0799061	0.000701894	0.727	0.767	0.722236	0.764847	896	0.218241	0.162436	0	1	1.48745e-22	1	2.55495e-36	MIC not significant	FALSE	TRUE	FALSE	FALSE	FALSE	TRUE	FALSE	FALSE
codonGTG	3971	0.114011	0.0388717	0	0.997564	1.03354e-18	0.994547	3817	0.102713	0.020469	0	0.746366	1.5531e-07	0.753893	6.56981e-19	non-significant monotone/non-monotone	TRUE	TRUE	FALSE	FALSE	TRUE	TRUE	FALSE	FALSE
codonGCT	3971	0.164996	0.142368	0	1	7.66295e-123	1	3788	0.146161	0.107474	0	1	2.24619e-67	1	1.3219e-95	Monotone	TRUE	TRUE	FALSE	TRUE	TRUE	TRUE	FALSE	TRUE
codonGCC	3971	0.0939395	0.00269617	0.005	0.022	0.00285831	0.0195351	3789	0.0953894	0.00723592	0.001	0.203	0.0025335	0.197905	1.57222e-07	non-significant monotone/non-monotone	TRUE	TRUE	FALSE	FALSE	TRUE	TRUE	FALSE	FALSE
codonGCA	3971	0.150653	0.0957612	0	1	8.80973e-83	1	3454	0.10542	0.0277263	0	0.998307	1.40729e-06	0.995273	6.7628e-23	Monotone	TRUE	TRUE	FALSE	TRUE	TRUE	TRUE	FALSE	TRUE
codonGCG	3971	0.100998	0.000133446	0	0	3.41394e-07	2.75983e-07	3904	0.104191	0.000461361	0	0	3.44668e-09	4.79868e-09	0.179662	Non-monotone	TRUE	TRUE	TRUE	FALSE	TRUE	TRUE	TRUE	FALSE
codonGAT	3971	0.0934943	0.000611445	0.002	0.006	0.0011533	0.00151116	1177	0.197581	0.146706	0	1	2.87852e-24	1	2.00413e-42	Monotone	TRUE	TRUE	FALSE	TRUE	TRUE	TRUE	FALSE	TRUE
codonGAC	3971	0.119624	0.0507104	0	1	8.01132e-25	0.99999	2992	0.0883667	0.000259376	0.757	0.752	0.759852	0.755796	0.378519	MIC not significant	TRUE	FALSE	FALSE	FALSE	TRUE	FALSE	FALSE	FALSE
codonGAA	3971	0.0872258	4.4246e-06	0.174	0.154	0.168669	0.151478	3621	0.0907379	0.00597275	0.133	0.648	0.126428	0.664847	3.22603e-06	MIC not significant	FALSE	FALSE	FALSE	FALSE	FALSE	FALSE	FALSE	FALSE
codonGAG	3971	0.0983415	0.000216489	6.45161e-05	6.45161e-05	1.67762e-05	1.61238e-05	3401	0.0951259	0.0139641	0.02	0.96	0.020536	0.958107	4.74076e-12	Monotone	TRUE	TRUE	FALSE	FALSE	TRUE	TRUE	FALSE	FALSE
codonGGT	3971	0.100813	0.0166684	3.22581e-05	0.450839	3.92804e-07	0.468505	3899	0.0986714	0.0134163	9.90099e-05	0.360792	1.43031e-05	0.374441	4.026e-13	non-significant monotone/non-monotone	TRUE	TRUE	FALSE	FALSE	TRUE	TRUE	FALSE	FALSE
codonGGC	3971	0.106924	0.0206753	0	0.232653	1.1029e-11	0.238818	3894	0.111162	0.0279176	0	0.597792	5.4938e-15	0.612125	8.91862e-26	non-significant monotone/non-monotone	TRUE	TRUE	FALSE	FALSE	TRUE	TRUE	FALSE	FALSE
codonGGA	3971	0.133102	0.0697285	0	1	7.41846e-48	1	3937	0.136713	0.0755692	0	1	2.94295e-56	1	3.32513e-69	Monotone	TRUE	TRUE	FALSE	TRUE	TRUE	TRUE	FALSE	TRUE
codonGGG	3971	0.115562	0.0357212	0	0.887157	7.23867e-21	0.883175	3888	0.109004	0.0247235	0	0.495881	3.92842e-13	0.511705	6.04737e-23	non-significant monotone/non-monotone	TRUE	TRUE	FALSE	FALSE	TRUE	TRUE	FALSE	FALSE
pcodonTTTTTT	3971	0.127169	0.0371372	0	0.0267228	9.10935e-37	0.0224019	1329	0.163319	0.0600398	0	0.995624	2.56215e-11	0.98869	1.27161e-19	Monotone	TRUE	TRUE	FALSE	TRUE	TRUE	TRUE	FALSE	TRUE
pcodonTTTTTC	3971	0.106227	0.0254389	0	0.562604	7.2638e-13	0.573533	844	0.199553	0.0872529	0	0.999416	1.00672e-12	0.996989	1.86676e-18	Monotone	TRUE	TRUE	FALSE	TRUE	TRUE	TRUE	FALSE	TRUE
pcodonTTTTTA	3971	0.0968783	0.0095886	0.000225806	0.0817742	2.05827e-05	0.0781312	1089	0.188589	0.116504	0	1	5.05022e-16	1	4.0713e-31	Monotone	TRUE	TRUE	FALSE	TRUE	TRUE	TRUE	FALSE	TRUE
pcodonTTTTTG	3971	0.130155	0.0452765	0	0.254347	3.58745e-42	0.259727	1167	0.149857	0.0419798	0.001	0.989	0.000180497	0.981142	1.58418e-12	Monotone	TRUE	TRUE	FALSE	TRUE	TRUE	TRUE	FALSE	TRUE
pcodonTTTTCT	3971	0.098847	0.0138603	0	0.0983465	7.5576e-08	0.0943608	660	0.203113	0.0904075	1.9802e-05	0.99997	4.70451e-08	0.999489	2.94302e-15	Monotone	TRUE	TRUE	FALSE	TRUE	TRUE	TRUE	FALSE	TRUE
pcodonTTTTCC	3971	0.082291	0.00432836	0.155	0.533	0.144182	0.542715	404	0.24424	0.102825	0.000108911	0.992891	5.02665e-07	0.982908	4.10064e-11	MIC not significant	FALSE	TRUE	FALSE	FALSE	FALSE	TRUE	FALSE	FALSE
pcodonTTTTCA	3971	0.087815	0.00865448	0.002	0.223	0.000553116	0.224704	286	0.260986	0.135247	0.000554455	0.99997	1.48251e-05	0.999413	1.37649e-10	Monotone	TRUE	TRUE	FALSE	TRUE	TRUE	TRUE	FALSE	TRUE
pcodonTTTTCG	3971	0.0941598	0.00927848	0.00016129	0.108613	5.58544e-05	0.104226	673	0.216213	0.121616	0	1	1.84684e-12	1	1.11557e-20	Monotone	TRUE	TRUE	FALSE	TRUE	TRUE	TRUE	FALSE	TRUE
pcodonTTTTAT	3971	0.109619	0.0240952	0	0.147228	1.05072e-15	0.146656	954	0.17787	0.0710174	0	0.999683	8.60889e-09	0.997936	5.65817e-17	Monotone	TRUE	TRUE	FALSE	TRUE	TRUE	TRUE	FALSE	TRUE
pcodonTTTTAC	3971	0.103027	0.0271403	0	0.770297	3.5992e-13	0.773876	428	0.220441	0.0780124	0.002	0.962	2.62835e-05	0.943539	4.13121e-09	Monotone	TRUE	TRUE	FALSE	FALSE	TRUE	TRUE	FALSE	FALSE
pcodonTTTTAA	3971	0.10213	0.0196209	0	0.193158	4.35229e-11	0.196346	540	0.197537	0.0804539	0.00154455	0.99998	0.000217929	0.999318	1.88838e-11	Monotone	TRUE	TRUE	FALSE	TRUE	TRUE	TRUE	FALSE	TRUE
pcodonTTTTAG	3971	0.0998956	0.0282036	0	0.995594	6.23542e-09	0.992889	597	0.237038	0.124252	0	1	9.9468e-14	0.999877	6.6092e-19	Monotone	TRUE	TRUE	FALSE	TRUE	TRUE	TRUE	FALSE	TRUE
pcodonTTTTGT	3971	0.127391	0.0455413	0	0.38703	5.83081e-41	0.398139	749	0.175831	0.0681398	0.00174257	1	0.000260351	0.999789	3.92048e-13	Monotone	TRUE	TRUE	FALSE	TRUE	TRUE	TRUE	FALSE	TRUE
pcodonTTTTGC	3971	0.0885144	0.00848555	0.013	0.531	0.0108143	0.539657	636	0.209112	0.0938187	2.9703e-05	0.99999	6.80665e-08	0.999526	2.78873e-15	Monotone	TRUE	TRUE	FALSE	TRUE	TRUE	TRUE	FALSE	TRUE
pcodonTTTTGA	3971	0.107699	0.0187793	0	0.0123465	3.90997e-15	0.00860607	712	0.200549	0.0704907	9.90099e-06	0.90699	3.66725e-09	0.896841	5.94941e-13	non-significant monotone/non-monotone	TRUE	TRUE	FALSE	FALSE	TRUE	TRUE	FALSE	FALSE
pcodonTTTTGG	3971	0.0979855	0.0129307	3.22581e-05	0.206516	3.92884e-06	0.208945	1051	0.178495	0.0740298	9.90099e-06	0.999772	4.37559e-11	0.998241	2.70302e-19	Monotone	TRUE	TRUE	FALSE	TRUE	TRUE	TRUE	FALSE	TRUE
pcodonTTTCTT	3971	0.0915704	0.00887064	0.005	0.339	0.00206011	0.351732	846	0.188654	0.123855	0	1	3.06791e-09	1	4.52679e-26	Monotone	TRUE	TRUE	FALSE	TRUE	TRUE	TRUE	FALSE	TRUE
pcodonTTTCTC	3971	0.0850532	0.0100304	0.013	0.681	0.00758513	0.685382	283	0.231075	0.0875622	0.019	0.997	0.00854338	0.990178	3.97981e-07	Monotone	TRUE	TRUE	FALSE	TRUE	TRUE	TRUE	FALSE	TRUE
pcodonTTTCTA	3971	0.0971519	0.0132372	0	0.0683762	5.40223e-08	0.063864	456	0.227898	0.110914	6.93069e-05	1	7.73208e-07	0.999749	2.84144e-13	Monotone	TRUE	TRUE	FALSE	TRUE	TRUE	TRUE	FALSE	TRUE
pcodonTTTCTG	3971	0.0893624	0.0145371	0.00270968	0.877581	0.00104641	0.872798	455	0.240835	0.110083	9.90099e-06	0.998218	4.88031e-09	0.993181	3.74134e-13	Monotone	TRUE	TRUE	FALSE	TRUE	TRUE	TRUE	FALSE	TRUE
pcodonTTTCCT	3971	0.0884217	0.00252121	0.018	0.059	0.012846	0.0556869	617	0.187577	0.0810331	0.00192079	1	0.000364456	0.999968	5.75518e-13	Monotone	TRUE	TRUE	FALSE	TRUE	TRUE	TRUE	FALSE	TRUE
pcodonTTTCCC	3971	0.0807307	0.00673004	0.054	0.624	0.045059	0.642159	200	0.304129	0.0876536	0.002	0.418	5.45106e-05	0.43683	2.07611e-05	MIC not significant	FALSE	TRUE	FALSE	FALSE	FALSE	TRUE	FALSE	FALSE
pcodonTTTCCA	3971	0.0880523	0.0117036	0.000419355	0.386387	7.31529e-05	0.398494	223	0.330806	0.102621	9.90099e-06	0.0683663	2.2346e-10	0.0591598	1.02767e-06	non-significant monotone/non-monotone	TRUE	TRUE	FALSE	FALSE	TRUE	TRUE	FALSE	FALSE
pcodonTTTCCG	3971	0.0887519	0.00886584	0.007	0.443	0.00399522	0.438986	514	0.248842	0.104346	0	0.923149	1.123e-12	0.911108	6.00948e-14	non-significant monotone/non-monotone	TRUE	TRUE	FALSE	FALSE	TRUE	TRUE	FALSE	FALSE
pcodonTTTCAT	3971	0.0860837	0.0184355	0.001	0.995	7.62879e-05	0.985846	136	0.307499	0.0585198	0.009	0.178	0.00385337	0.184532	0.00454905	non-significant monotone/non-monotone	TRUE	TRUE	FALSE	FALSE	TRUE	TRUE	FALSE	FALSE
pcodonTTTCAC	3971	0.0837764	0.00915983	0.001	0.461	0.00025889	0.474003	93	0.299617	0.0772237	0.092	0.665	0.0902833	0.687192	0.00699706	MIC not significant	TRUE	FALSE	FALSE	FALSE	TRUE	FALSE	FALSE	FALSE
pcodonTTTCAA	3971	0.0828038	0.0111965	0.002	0.889	0.000778181	0.880122	89	0.295376	0.154195	0.165168	0.999525	0.172208	0.997241	0.000141115	MIC not significant	TRUE	FALSE	FALSE	FALSE	TRUE	FALSE	FALSE	FALSE
pcodonTTTCAG	3971	0.0789281	0.00367147	0.168	0.541	0.171166	0.550277	223	0.249494	0.113333	0.0192772	0.999743	0.00901393	0.997748	2.6031e-07	MIC not significant	FALSE	TRUE	FALSE	FALSE	FALSE	TRUE	FALSE	FALSE
pcodonTTTCGT	3971	0.0908878	0.0127417	0.005	0.772	0.00206979	0.775029	710	0.230109	0.118313	0	0.999931	1.3947e-18	0.999186	3.77747e-21	Monotone	TRUE	TRUE	FALSE	TRUE	TRUE	TRUE	FALSE	TRUE
pcodonTTTCGC	3971	0.0893663	0.0146141	0.001	0.602	3.56413e-05	0.623916	232	0.278171	0.155416	0.00272277	1	0.00037706	0.999949	4.77706e-10	Monotone	TRUE	TRUE	FALSE	TRUE	TRUE	TRUE	FALSE	TRUE
pcodonTTTCGA	3971	0.0886221	0.00904933	0.004	0.464	0.00466419	0.477031	523	0.254005	0.125882	0	0.998446	3.59736e-15	0.994233	5.8437e-17	Monotone	TRUE	TRUE	FALSE	TRUE	TRUE	TRUE	FALSE	TRUE
pcodonTTTCGG	3971	0.105008	0.0188239	0	0.027297	8.50764e-14	0.0225377	510	0.245722	0.116363	0	0.999394	2.043e-11	0.995898	2.30793e-15	Monotone	TRUE	TRUE	FALSE	TRUE	TRUE	TRUE	FALSE	TRUE
pcodonTTTATT	3971	0.103035	0.00800712	0	0.000772277	8.99934e-09	0.000325671	1388	0.162673	0.0912979	0	1	4.081e-12	1	1.081e-30	Monotone	TRUE	TRUE	FALSE	TRUE	TRUE	TRUE	FALSE	TRUE
pcodonTTTATC	3971	0.0931026	0.0114309	0.001	0.391	0.000193911	0.388046	677	0.203104	0.103163	9.90099e-06	1	3.74155e-09	0.999991	1.03708e-17	Monotone	TRUE	TRUE	FALSE	TRUE	TRUE	TRUE	FALSE	TRUE
pcodonTTTATA	3971	0.101224	0.0157221	0	0.11251	5.97528e-09	0.110577	815	0.186313	0.117392	1.9802e-05	1	2.7267e-08	1	7.29015e-24	Monotone	TRUE	TRUE	FALSE	TRUE	TRUE	TRUE	FALSE	TRUE
pcodonTTTATG	3971	0.104248	0.0140732	0	0.020703	5.26361e-10	0.0162569	1197	0.1593	0.0793133	9.90099e-06	1	4.64164e-07	1	2.9257e-23	Monotone	TRUE	TRUE	FALSE	TRUE	TRUE	TRUE	FALSE	TRUE
pcodonTTTACT	3971	0.0878124	0.00994502	0.006	0.651	0.0059523	0.649441	486	0.270367	0.125892	0	0.931792	1.70687e-17	0.917772	7.27867e-16	non-significant monotone/non-monotone	TRUE	TRUE	FALSE	FALSE	TRUE	TRUE	FALSE	FALSE
pcodonTTTACC	3971	0.086427	0.00022903	0.006	0.006	0.00429091	0.00401663	344	0.28943	0.194557	0	1	1.95613e-12	1	8.26049e-18	Monotone	TRUE	TRUE	FALSE	TRUE	TRUE	TRUE	FALSE	TRUE
pcodonTTTACA	3971	0.0772396	0.00251714	0.23	0.5	0.242888	0.510877	185	0.308511	0.178995	0.00131683	0.99998	4.77041e-05	0.999657	1.9777e-09	MIC not significant	FALSE	TRUE	FALSE	FALSE	FALSE	TRUE	FALSE	FALSE
pcodonTTTACG	3971	0.0779437	2.85679e-06	0.78	0.768	0.784938	0.765494	632	0.254876	0.165453	0	1	2.17091e-24	1	1.40066e-26	MIC not significant	FALSE	TRUE	FALSE	FALSE	FALSE	TRUE	FALSE	FALSE
pcodonTTTAAT	3971	0.0920335	0.0187924	2.9703e-05	0.895485	7.02838e-06	0.89197	334	0.28837	0.155862	9.90099e-06	0.999842	8.81136e-11	0.998546	6.6451e-14	Monotone	TRUE	TRUE	FALSE	TRUE	TRUE	TRUE	FALSE	TRUE
pcodonTTTAAC	3971	0.0854115	0.00679924	0.012	0.269	0.00712114	0.289785	296	0.272298	0.187087	0.000173554	1	2.66079e-06	1	6.33406e-15	Monotone	TRUE	TRUE	FALSE	TRUE	TRUE	TRUE	FALSE	TRUE
pcodonTTTAAA	3971	0.0858199	0.00648569	0.00125806	0.0961935	0.000490176	0.0914768	201	0.271674	0.153351	0.0186832	1	0.00970803	0.999984	9.00296e-09	Monotone	TRUE	TRUE	FALSE	TRUE	TRUE	TRUE	FALSE	TRUE
pcodonTTTAAG	3971	0.0882538	6.9973e-06	0.019	0.017	0.0155204	0.0127849	637	0.227533	0.113886	0	0.99998	1.21874e-12	0.999764	1.97219e-18	Monotone	TRUE	TRUE	FALSE	TRUE	TRUE	TRUE	FALSE	TRUE
pcodonTTTAGT	3971	0.0905261	0.0120806	0.003	0.548	0.000596369	0.554758	456	0.280908	0.16497	0	1	5.17533e-19	0.999842	1.53531e-19	Monotone	TRUE	TRUE	FALSE	TRUE	TRUE	TRUE	FALSE	TRUE
pcodonTTTAGC	3971	0.0828589	0.00259638	0.108	0.276	0.101811	0.28488	425	0.26237	0.138975	0	0.999861	1.21296e-12	0.998675	1.84816e-15	MIC not significant	FALSE	TRUE	FALSE	FALSE	FALSE	TRUE	FALSE	FALSE
pcodonTTTAGA	3971	0.0944107	0.00858415	1.9802e-05	0.0277327	5.15249e-06	0.023472	485	0.232776	0.120126	9.90099e-06	1	2.99762e-08	0.999946	3.9005e-15	Monotone	TRUE	TRUE	FALSE	TRUE	TRUE	TRUE	FALSE	TRUE
pcodonTTTAGG	3971	0.0894889	0.00378487	0.017	0.132	0.0143321	0.125156	874	0.236011	0.142484	0	1	8.61079e-30	1	5.56407e-31	Monotone	TRUE	TRUE	FALSE	TRUE	TRUE	TRUE	FALSE	TRUE
pcodonTTTGTT	3971	0.0702451	2.11841e-07	0.972	0.964	0.957975	0.949939	94	0.425219	0.21565	0.000277228	0.747089	4.83386e-07	0.755299	2.42102e-06	MIC not significant	FALSE	TRUE	FALSE	FALSE	FALSE	TRUE	FALSE	FALSE
pcodonTTTGTC	3971	0.0880139	0.00359284	0.021	0.124	0.016413	0.122144	641	0.233807	0.136694	0	1	4.41597e-15	1	3.40064e-22	Monotone	FALSE	TRUE	FALSE	FALSE	TRUE	TRUE	FALSE	TRUE
pcodonTTTGTA	3971	0.0782157	0.000958646	0.058	0.127	0.0513918	0.118068	46	0.268266	0.00131507	0.346	0.223	0.401121	0.252647	0.810902	MIC not significant	FALSE	FALSE	FALSE	FALSE	FALSE	FALSE	FALSE	FALSE
pcodonTTTGTG	3971	0.107466	0.0185755	0	0.0146436	1.34547e-14	0.0108356	759	0.205689	0.106198	0	1	3.70333e-12	0.999991	3.08575e-20	Monotone	TRUE	TRUE	FALSE	TRUE	TRUE	TRUE	FALSE	TRUE
pcodonTTTGCT	3971	0.102027	0.0217442	0	0.50302	3.26735e-10	0.513151	644	0.20497	0.08397	9.90099e-06	0.999317	2.00727e-07	0.996905	6.33691e-14	Monotone	TRUE	TRUE	FALSE	TRUE	TRUE	TRUE	FALSE	TRUE
pcodonTTTGCC	3971	0.0894573	0.00588373	0.003	0.084	0.0016815	0.0825038	432	0.231545	0.117568	0.000287129	1	8.40526e-06	0.999976	2.3123e-13	Monotone	TRUE	TRUE	FALSE	TRUE	TRUE	TRUE	FALSE	TRUE
pcodonTTTGCA	3971	0.0933119	0.01607	3.22581e-05	0.488097	1.15954e-06	0.502897	327	0.26848	0.138267	6.93069e-05	0.99997	4.92796e-07	0.999482	3.67635e-12	Monotone	TRUE	TRUE	FALSE	TRUE	TRUE	TRUE	FALSE	TRUE
pcodonTTTGCG	3971	0.0904578	0.00867436	0.004	0.376	0.0025571	0.38075	720	0.194016	0.089954	3.9604e-05	1	6.58873e-08	0.999926	1.9704e-16	Monotone	TRUE	TRUE	FALSE	TRUE	TRUE	TRUE	FALSE	TRUE
pcodonTTTGAT	3971	0.076656	5.89178e-06	0.245	0.206	0.27838	0.238712	53	0.282799	0.18399	0.449594	0.999792	0.500624	0.999185	0.00135189	MIC not significant	FALSE	FALSE	FALSE	FALSE	FALSE	FALSE	FALSE	FALSE
pcodonTTTGAC	3971	0.0862279	0.00921345	0.001	0.223	0.000126196	0.223619	163	0.25579	0.101543	0.108	0.995	0.0963517	0.988464	3.38858e-05	MIC not significant	TRUE	FALSE	FALSE	FALSE	TRUE	FALSE	FALSE	FALSE
pcodonTTTGAA	3971	0.0824269	0.00457165	0.195	0.64	0.199574	0.652	511	0.257699	0.130412	0	0.999436	1.02815e-14	0.997128	3.47145e-17	MIC not significant	FALSE	TRUE	FALSE	FALSE	FALSE	TRUE	FALSE	FALSE
pcodonTTTGAG	3971	0.0835112	0.00705557	0.041	0.595	0.0402694	0.594215	317	0.275841	0.148503	9.90099e-06	0.999941	8.26468e-09	0.999041	1.15574e-12	Monotone	FALSE	TRUE	FALSE	FALSE	FALSE	TRUE	FALSE	FALSE
pcodonTTTGGT	3971	0.0983492	0.0153726	3.22581e-05	0.360194	1.3702e-06	0.371947	933	0.196546	0.101229	0	1	4.31094e-14	0.999997	2.15948e-23	Monotone	TRUE	TRUE	FALSE	TRUE	TRUE	TRUE	FALSE	TRUE
pcodonTTTGGC	3971	0.0892475	0.00602303	0.009	0.228	0.00630992	0.225047	679	0.203413	0.0942671	2.9703e-05	1	8.46915e-08	0.999924	2.74099e-16	Monotone	TRUE	TRUE	FALSE	TRUE	TRUE	TRUE	FALSE	TRUE
pcodonTTTGGA	3971	0.0861096	0.00134243	0.108	0.177	0.108426	0.182144	915	0.203692	0.127789	0	1	8.34057e-18	1	5.73922e-29	MIC not significant	FALSE	TRUE	FALSE	FALSE	FALSE	TRUE	FALSE	FALSE
pcodonTTTGGG	3971	0.107567	0.0222677	0	0.158614	1.16709e-13	0.159028	941	0.189863	0.0762875	0	0.994515	3.50196e-12	0.987843	6.14305e-18	Monotone	TRUE	TRUE	FALSE	TRUE	TRUE	TRUE	FALSE	TRUE
pcodonTTCTTT	3971	0.0981575	0.0188231	9.90099e-06	0.757109	1.58941e-06	0.760933	927	0.179598	0.0850222	9.90099e-06	1	4.84407e-08	0.999999	1.26318e-19	Monotone	TRUE	TRUE	FALSE	TRUE	TRUE	TRUE	FALSE	TRUE
pcodonTTCTTC	3971	0.0862894	0.00977561	0.061	0.878	0.058836	0.881958	696	0.185184	0.0732353	0.000782178	0.99999	5.95427e-05	0.999602	3.79827e-13	MIC not significant	FALSE	TRUE	FALSE	FALSE	FALSE	TRUE	FALSE	FALSE
pcodonTTCTTA	3971	0.0836372	0.001495	0.232	0.366	0.246104	0.378369	756	0.235486	0.131086	0	1	2.26328e-23	0.99991	7.85132e-25	MIC not significant	FALSE	TRUE	FALSE	FALSE	FALSE	TRUE	FALSE	FALSE
pcodonTTCTTG	3971	0.112118	0.0277924	0	0.203706	8.09169e-19	0.207257	863	0.168271	0.0664354	0.001	1	6.83075e-05	0.999908	1.45702e-14	Monotone	TRUE	TRUE	FALSE	TRUE	TRUE	TRUE	FALSE	TRUE
pcodonTTCTCT	3971	0.0920972	0.0225119	0.00016129	0.997774	2.93712e-05	0.994619	411	0.222926	0.0990419	0.00138614	0.99999	0.000151094	0.999381	6.69672e-11	Monotone	TRUE	TRUE	FALSE	TRUE	TRUE	TRUE	FALSE	TRUE
pcodonTTCTCC	3971	0.0757578	0.000316139	0.696	0.699	0.703653	0.708642	324	0.27866	0.149641	9.90099e-06	0.99999	3.2313e-08	0.999662	5.23341e-13	MIC not significant	FALSE	TRUE	FALSE	FALSE	FALSE	TRUE	FALSE	FALSE
pcodonTTCTCA	3971	0.0806358	0.00630173	0.033	0.53	0.0316452	0.550855	178	0.249732	0.0701255	0.14	0.964	0.140822	0.941338	0.000354088	MIC not significant	FALSE	FALSE	FALSE	FALSE	FALSE	FALSE	FALSE	FALSE
pcodonTTCTCG	3971	0.0782974	0.00339346	0.578	0.859	0.591696	0.866557	467	0.234444	0.126502	9.90099e-06	1	8.846e-09	0.999976	2.2601e-15	MIC not significant	FALSE	TRUE	FALSE	FALSE	FALSE	TRUE	FALSE	FALSE
pcodonTTCTAT	3971	0.0875355	0.00246	0.011	0.049	0.0096023	0.0449725	481	0.246166	0.110042	9.90099e-06	0.991198	8.44726e-11	0.982156	8.08533e-14	Monotone	TRUE	TRUE	FALSE	TRUE	TRUE	TRUE	FALSE	TRUE
pcodonTTCTAC	3971	0.0978191	0.0240057	0	0.846099	4.79518e-10	0.844708	322	0.278286	0.156971	9.90099e-06	0.99999	6.97443e-10	0.999602	1.50983e-13	Monotone	TRUE	TRUE	FALSE	TRUE	TRUE	TRUE	FALSE	TRUE
pcodonTTCTAA	3971	0.089012	0.00622494	0.000118812	0.0195446	3.18849e-05	0.0149332	234	0.282004	0.067715	0.001	0.254	0.000188799	0.28084	5.6032e-05	non-significant monotone/non-monotone	TRUE	TRUE	FALSE	FALSE	TRUE	TRUE	FALSE	FALSE
pcodonTTCTAG	3971	0.0956242	0.0183779	0	0.620911	2.5595e-07	0.632563	424	0.232701	0.102304	0.000118812	0.998772	1.0611e-06	0.994709	1.53376e-11	Monotone	TRUE	TRUE	FALSE	TRUE	TRUE	TRUE	FALSE	TRUE
pcodonTTCTGT	3971	0.089825	0.0174372	0.000387097	0.950032	0.000211946	0.944624	366	0.237046	0.12167	0.00113861	1	9.97282e-05	0.999974	6.54657e-12	Monotone	TRUE	TRUE	FALSE	TRUE	TRUE	TRUE	FALSE	TRUE
pcodonTTCTGC	3971	0.0809805	0.00220369	0.241	0.455	0.251471	0.461871	422	0.250975	0.14386	8.77193e-06	1	1.01388e-09	0.999992	6.91116e-16	MIC not significant	FALSE	TRUE	FALSE	FALSE	FALSE	TRUE	FALSE	FALSE
pcodonTTCTGA	3971	0.0845257	0.00526781	0.036	0.331	0.0291735	0.348204	390	0.24513	0.126556	3.9604e-05	0.99998	1.38625e-07	0.999753	4.44965e-13	Monotone	FALSE	TRUE	FALSE	FALSE	FALSE	TRUE	FALSE	FALSE
pcodonTTCTGG	3971	0.0824881	0.00707013	0.296	0.933	0.300068	0.92612	644	0.230365	0.104079	0	0.994782	4.0891e-14	0.987035	4.59475e-17	MIC not significant	FALSE	TRUE	FALSE	FALSE	FALSE	TRUE	FALSE	FALSE
pcodonTTCCTT	3971	0.0826823	0.00232891	0.207	0.435	0.211964	0.427038	555	0.2412	0.13078	0	1	8.28324e-13	0.999966	1.36917e-18	MIC not significant	FALSE	TRUE	FALSE	FALSE	FALSE	TRUE	FALSE	FALSE
pcodonTTCCTC	3971	0.0789999	0.00426667	0.115	0.51	0.111578	0.519724	188	0.283358	0.0980088	0.009	0.827	0.00231775	0.821448	1.21795e-05	MIC not significant	FALSE	TRUE	FALSE	FALSE	FALSE	TRUE	FALSE	FALSE
pcodonTTCCTA	3971	0.092417	0.0123223	3.22581e-05	0.154	1.61791e-06	0.155384	292	0.270114	0.0862807	0.000475248	0.637772	1.23193e-05	0.659057	3.20429e-07	non-significant monotone/non-monotone	TRUE	TRUE	FALSE	FALSE	TRUE	TRUE	FALSE	FALSE
pcodonTTCCTG	3971	0.0836145	0.0087883	0.041	0.754	0.0337165	0.762448	319	0.261288	0.101672	5.94059e-05	0.873119	5.83332e-07	0.864468	5.69669e-09	non-significant monotone/non-monotone	FALSE	TRUE	FALSE	FALSE	FALSE	TRUE	FALSE	FALSE
pcodonTTCCCT	3971	0.076587	7.05086e-05	0.696	0.671	0.689421	0.667817	374	0.325924	0.216488	0	1	1.4915e-23	0.999993	1.72588e-21	MIC not significant	FALSE	TRUE	FALSE	FALSE	FALSE	TRUE	FALSE	FALSE
pcodonTTCCCC	3971	0.0804106	0.00544278	0.036	0.416	0.0261036	0.427702	131	0.328818	0.0878524	0.006	0.338	0.00213487	0.379925	0.000587092	non-significant monotone/non-monotone	FALSE	TRUE	FALSE	FALSE	FALSE	TRUE	FALSE	FALSE
pcodonTTCCCA	3971	0.0826231	0.00487304	0.004	0.095	0.00113123	0.0948741	104	0.314244	0.113639	0.067	0.924	0.0517094	0.900373	0.000466571	MIC not significant	TRUE	FALSE	FALSE	FALSE	TRUE	FALSE	FALSE	FALSE
pcodonTTCCCG	3971	0.0826117	0.0024786	0.047	0.156	0.0480226	0.158469	297	0.243879	0.0737858	0.006	0.847	0.00226242	0.837121	2.02242e-06	non-significant monotone/non-monotone	FALSE	TRUE	FALSE	FALSE	FALSE	TRUE	FALSE	FALSE
pcodonTTCCAT	3971	0.0769039	0.00674209	0.189	1	0.193216	0.999491	45	0.488313	0.127398	0.00137624	0.022505	1.51136e-05	0.00919209	0.016091	MIC not significant	FALSE	TRUE	FALSE	FALSE	FALSE	TRUE	FALSE	FALSE
pcodonTTCCAC	3971	0.078248	0.00361394	0.088	0.551	0.0743357	0.580616	59	0.34099	0.125326	0.06	0.71	0.0399253	0.71192	0.00594596	MIC not significant	FALSE	FALSE	FALSE	FALSE	FALSE	FALSE	FALSE	FALSE
pcodonTTCCAG	3971	0.0750564	0.000994873	0.439	0.549	0.448749	0.554736	122	0.224417	0.0759706	0.513	0.996	0.539429	0.991652	0.00212049	MIC not significant	FALSE	FALSE	FALSE	FALSE	FALSE	FALSE	FALSE	FALSE
pcodonTTCCGT	3971	0.0804232	0.00479148	0.099	0.538	0.102244	0.543249	255	0.264887	0.122898	0.001	0.999	5.05652e-05	0.992086	8.70239e-09	MIC not significant	FALSE	TRUE	FALSE	FALSE	FALSE	TRUE	FALSE	FALSE
pcodonTTCCGC	3971	0.0761492	0.00710971	0.292	0.96	0.295545	0.958256	130	0.339749	0.118101	0.002	0.614	0.000628888	0.641855	6.2522e-05	MIC not significant	FALSE	TRUE	FALSE	FALSE	FALSE	TRUE	FALSE	FALSE
pcodonTTCCGA	3971	0.0760128	0.00548545	0.379	0.931	0.410217	0.927518	198	0.237206	0.104499	0.081	0.999	0.0729708	0.999009	3.39687e-06	MIC not significant	FALSE	FALSE	FALSE	FALSE	FALSE	FALSE	FALSE	FALSE
pcodonTTCCGG	3971	0.083568	0.0124252	0.013	0.956	0.0125807	0.944783	266	0.304805	0.0853162	1.9802e-05	0.0980792	1.00732e-08	0.093104	1.25013e-06	non-significant monotone/non-monotone	TRUE	TRUE	FALSE	FALSE	TRUE	TRUE	FALSE	FALSE
pcodonTTCATT	3971	0.0953342	0.0147241	0.000258065	0.623613	7.25424e-05	0.632684	922	0.190259	0.0934838	0	1	5.09771e-11	0.999995	2.10318e-21	Monotone	TRUE	TRUE	FALSE	TRUE	TRUE	TRUE	FALSE	TRUE
pcodonTTCATC	3971	0.0886176	0.00959666	0.005	0.439	0.00214517	0.456596	445	0.268526	0.125658	0	0.972911	3.42851e-14	0.959219	1.27292e-14	Monotone	TRUE	TRUE	FALSE	TRUE	TRUE	TRUE	FALSE	FALSE
pcodonTTCATA	3971	0.0804263	0.00537273	0.238	0.813	0.256663	0.800883	384	0.22766	0.0941394	0.00119802	0.998693	9.49425e-05	0.994262	8.16924e-10	MIC not significant	FALSE	TRUE	FALSE	FALSE	FALSE	TRUE	FALSE	FALSE
pcodonTTCATG	3971	0.0946058	0.0124033	0.002	0.369	7.18495e-05	0.382951	765	0.193362	0.0981047	9.90099e-06	1	5.4328e-09	0.999999	7.10698e-19	Monotone	TRUE	TRUE	FALSE	TRUE	TRUE	TRUE	FALSE	TRUE
pcodonTTCACT	3971	0.0801879	0.0054278	0.172	0.722	0.17619	0.731523	300	0.240699	0.095748	0.008	0.997	0.00177856	0.991196	4.44937e-08	MIC not significant	FALSE	TRUE	FALSE	FALSE	FALSE	TRUE	FALSE	FALSE
pcodonTTCACC	3971	0.0759945	3.62942e-06	0.474	0.438	0.483889	0.455183	231	0.312754	0.175499	6.93069e-05	0.99996	2.8071e-07	0.999281	3.12529e-11	MIC not significant	FALSE	TRUE	FALSE	FALSE	FALSE	TRUE	FALSE	FALSE
pcodonTTCACA	3971	0.0756706	0.00375981	0.337	0.846	0.357908	0.836158	89	0.372392	0.127524	0.006	0.499	0.00100113	0.526374	0.000591886	MIC not significant	FALSE	TRUE	FALSE	FALSE	FALSE	TRUE	FALSE	FALSE
pcodonTTCACG	3971	0.0779055	0.000105191	0.47	0.449	0.471573	0.454319	349	0.278315	0.148989	0	0.999832	6.02711e-11	0.998321	7.61723e-14	MIC not significant	FALSE	TRUE	FALSE	FALSE	FALSE	TRUE	FALSE	FALSE
pcodonTTCAAT	3971	0.0825616	0.00843144	0.028	0.69	0.0250242	0.6935	240	0.241618	0.0732773	0.025	0.938	0.019296	0.920523	2.12457e-05	non-significant monotone/non-monotone	FALSE	TRUE	FALSE	FALSE	FALSE	TRUE	FALSE	FALSE
pcodonTTCAAC	3971	0.0830498	0.0108652	0.026	0.873	0.0141882	0.86962	239	0.263106	0.1016	0.008	0.975	0.00159507	0.962468	4.80875e-07	Monotone	FALSE	TRUE	FALSE	FALSE	TRUE	TRUE	FALSE	FALSE
pcodonTTCAAA	3971	0.0792427	0.00146831	0.069	0.142	0.0662079	0.136128	145	0.297345	0.176931	0.00918812	0.99999	0.00265311	0.999723	1.38141e-07	MIC not significant	FALSE	TRUE	FALSE	FALSE	FALSE	TRUE	FALSE	FALSE
pcodonTTCAAG	3971	0.0899047	0.000930213	0.006	0.007	0.00179171	0.00320339	502	0.265492	0.187447	0	1	1.36661e-18	1	2.37151e-24	Monotone	TRUE	TRUE	FALSE	TRUE	TRUE	TRUE	FALSE	TRUE
pcodonTTCAGT	3971	0.0788141	0.00343684	0.166	0.48	0.165119	0.49977	218	0.325975	0.216354	9.90099e-06	1	4.61529e-09	0.999986	4.21338e-13	MIC not significant	FALSE	TRUE	FALSE	FALSE	FALSE	TRUE	FALSE	FALSE
pcodonTTCAGC	3971	0.0748682	0.000115747	0.711	0.687	0.72436	0.709239	284	0.277801	0.163894	5.94059e-05	1	1.89746e-07	0.999958	1.26043e-12	MIC not significant	FALSE	TRUE	FALSE	FALSE	FALSE	TRUE	FALSE	FALSE
pcodonTTCAGA	3971	0.0791192	0.00587141	0.149	0.769	0.150825	0.771095	224	0.258838	0.120062	0.008	0.998	0.00231682	0.99681	1.02222e-07	MIC not significant	FALSE	TRUE	FALSE	FALSE	FALSE	TRUE	FALSE	FALSE
pcodonTTCAGG	3971	0.0774359	0.00250146	0.711	0.894	0.727434	0.89597	507	0.215573	0.129253	0.000118812	1	1.22832e-06	1	6.47929e-17	MIC not significant	FALSE	TRUE	FALSE	FALSE	FALSE	TRUE	FALSE	FALSE
pcodonTTCGTC	3971	0.079144	0.001013	0.409	0.495	0.420427	0.509363	402	0.221291	0.0920231	0.00332673	0.999812	0.000619567	0.99855	5.29148e-10	MIC not significant	FALSE	TRUE	FALSE	FALSE	FALSE	TRUE	FALSE	FALSE
pcodonTTCGTG	3971	0.0839542	0.00643722	0.078	0.625	0.0755964	0.633753	442	0.271415	0.169232	0	1	2.33448e-14	0.999999	1.76423e-19	MIC not significant	FALSE	TRUE	FALSE	FALSE	FALSE	TRUE	FALSE	FALSE
pcodonTTCGCT	3971	0.0954467	0.0197062	0	0.774119	3.06672e-07	0.77721	418	0.271431	0.144665	0	0.999832	9.82557e-14	0.998425	7.76917e-16	Monotone	TRUE	TRUE	FALSE	TRUE	TRUE	TRUE	FALSE	TRUE
pcodonTTCGCC	3971	0.0825218	0.006798	0.074	0.685	0.0672535	0.67929	325	0.234773	0.11193	0.00727723	1	0.00258119	0.999904	6.11953e-10	MIC not significant	FALSE	TRUE	FALSE	FALSE	FALSE	TRUE	FALSE	FALSE
pcodonTTCGCA	3971	0.0789494	0.00925272	0.093	0.942	0.0943603	0.941037	169	0.27026	0.127335	0.0234851	0.999446	0.012295	0.995948	1.91471e-06	MIC not significant	FALSE	TRUE	FALSE	FALSE	FALSE	TRUE	FALSE	FALSE
pcodonTTCGCG	3971	0.0836432	0.0128515	0.119	0.998	0.116077	0.996038	531	0.22434	0.0946219	9.90099e-06	0.995089	1.49632e-08	0.987791	4.22713e-13	MIC not significant	FALSE	TRUE	FALSE	FALSE	FALSE	TRUE	FALSE	FALSE
pcodonTTCGAC	3971	0.0823637	0.00651398	0.004	0.276	0.00133245	0.292195	92	0.36768	0.14493	0.004	0.652	0.000860252	0.670029	0.000181411	non-significant monotone/non-monotone	TRUE	TRUE	FALSE	FALSE	TRUE	TRUE	FALSE	FALSE
pcodonTTCGAA	3971	0.0771726	0.00152368	0.41	0.551	0.405591	0.564335	261	0.23346	0.0961674	0.0515941	0.999901	0.040435	0.998753	3.17914e-07	MIC not significant	FALSE	FALSE	FALSE	FALSE	FALSE	FALSE	FALSE	FALSE
pcodonTTCGAG	3971	0.0755129	5.04683e-05	0.481	0.46	0.490204	0.464419	190	0.282037	0.154714	0.00573267	0.99997	0.00114093	0.999623	1.97763e-08	MIC not significant	FALSE	TRUE	FALSE	FALSE	FALSE	TRUE	FALSE	FALSE
pcodonTTCGGT	3971	0.0885463	0.0077345	0.009	0.278	0.00329985	0.29107	467	0.216334	0.0948574	0.000356436	0.999941	1.16776e-05	0.998682	1.01786e-11	Monotone	TRUE	TRUE	FALSE	TRUE	TRUE	TRUE	FALSE	TRUE
pcodonTTCGGC	3971	0.08184	0.00205832	0.134	0.295	0.141042	0.298939	391	0.245262	0.153636	2.9703e-05	1	1.0653e-07	1	8.26865e-16	MIC not significant	FALSE	TRUE	FALSE	FALSE	FALSE	TRUE	FALSE	FALSE
pcodonTTCGGA	3971	0.0769546	5.65599e-05	0.836	0.823	0.839769	0.825944	578	0.263956	0.203797	0	1	3.02449e-23	1	2.28528e-30	MIC not significant	FALSE	TRUE	FALSE	FALSE	FALSE	TRUE	FALSE	FALSE
pcodonTTCGGG	3971	0.0855532	0.0101657	0.043	0.893	0.0372084	0.885745	516	0.256465	0.13111	0	0.999743	8.31463e-15	0.998037	1.97677e-17	Monotone	FALSE	TRUE	FALSE	FALSE	FALSE	TRUE	FALSE	FALSE
pcodonTTATTT	3971	0.0877356	0.00329741	0.108	0.348	0.102812	0.35418	1402	0.175436	0.108857	0	1	8.25709e-20	1	5.90358e-37	MIC not significant	FALSE	TRUE	FALSE	FALSE	FALSE	TRUE	FALSE	FALSE
pcodonTTATTC	3971	0.0905357	5.76658e-06	0.005	0.004	0.00227085	0.00178655	703	0.235395	0.139423	0	1	1.01514e-19	0.999999	1.11395e-24	Monotone	TRUE	TRUE	FALSE	TRUE	TRUE	TRUE	FALSE	TRUE
pcodonTTATTA	3971	0.0930635	0.00447214	0.004	0.044	0.001526	0.0398141	1135	0.252811	0.221543	0	1	7.65299e-65	1	1.21638e-63	Monotone	TRUE	TRUE	FALSE	TRUE	TRUE	TRUE	FALSE	TRUE
pcodonTTATTG	3971	0.09881	0.0117595	9.80392e-06	0.0668137	6.63083e-07	0.0624538	908	0.17867	0.0832024	9.90099e-06	1	3.63295e-08	0.999993	7.37809e-19	Monotone	TRUE	TRUE	FALSE	TRUE	TRUE	TRUE	FALSE	TRUE
pcodonTTATCT	3971	0.0848031	0.00294934	0.075	0.263	0.07716	0.260554	527	0.236284	0.102116	9.90099e-06	0.984931	5.29443e-11	0.973625	5.62926e-14	MIC not significant	FALSE	TRUE	FALSE	FALSE	FALSE	TRUE	FALSE	FALSE
pcodonTTATCC	3971	0.0767508	0.0014571	0.618	0.751	0.638626	0.763065	356	0.326452	0.196781	0	0.999564	3.28077e-23	0.996909	1.35176e-18	MIC not significant	FALSE	TRUE	FALSE	FALSE	FALSE	TRUE	FALSE	FALSE
pcodonTTATCA	3971	0.0797331	0.00663269	0.133	0.81	0.133555	0.804169	244	0.24684	0.115393	0.0176733	1	0.00880057	0.999362	5.27939e-08	MIC not significant	FALSE	TRUE	FALSE	FALSE	FALSE	TRUE	FALSE	FALSE
pcodonTTATCG	3971	0.0846182	0.000959355	0.06	0.082	0.0593169	0.0864164	474	0.250505	0.147382	9.90099e-06	1	4.68616e-11	0.999999	4.29985e-18	MIC not significant	FALSE	TRUE	FALSE	FALSE	FALSE	TRUE	FALSE	FALSE
pcodonTTATAT	3971	0.0771135	6.42022e-05	0.874	0.864	0.863701	0.849477	699	0.242769	0.182688	0	1	1.83873e-22	1	2.05961e-32	MIC not significant	FALSE	TRUE	FALSE	FALSE	FALSE	TRUE	FALSE	FALSE
pcodonTTATAC	3971	0.0816233	0.0063886	0.075	0.631	0.0645376	0.637445	277	0.276548	0.158033	0.000118812	1	1.37412e-06	0.999927	6.34776e-12	MIC not significant	FALSE	TRUE	FALSE	FALSE	FALSE	TRUE	FALSE	FALSE
pcodonTTATAA	3971	0.0849815	0.00896059	0.018	0.658	0.0141211	0.671486	353	0.270043	0.0952393	0	0.422396	4.71963e-10	0.451277	3.16405e-09	non-significant monotone/non-monotone	TRUE	TRUE	FALSE	FALSE	TRUE	TRUE	FALSE	FALSE
pcodonTTATAG	3971	0.0879251	0.0140333	0.001	0.864	0.00116147	0.867814	361	0.225817	0.0438195	0.006	0.4	0.00293443	0.423627	6.12379e-05	non-significant monotone/non-monotone	TRUE	TRUE	FALSE	FALSE	TRUE	TRUE	FALSE	FALSE
pcodonTTATGT	3971	0.100117	0.017263	0	0.129505	5.15128e-10	0.127104	477	0.272137	0.178209	0	1	1.21788e-16	1	4.89362e-22	Monotone	TRUE	TRUE	FALSE	TRUE	TRUE	TRUE	FALSE	TRUE
pcodonTTATGC	3971	0.087717	8.41421e-06	0.005	0.005	0.0049549	0.00387467	439	0.278263	0.209912	0	1	6.93916e-16	1	3.62156e-24	Monotone	TRUE	TRUE	FALSE	TRUE	TRUE	TRUE	FALSE	TRUE
pcodonTTATGA	3971	0.0820748	0.000991634	0.127	0.166	0.129799	0.178001	401	0.242159	0.142118	0.000128713	1	1.63281e-06	1	5.46183e-15	MIC not significant	FALSE	TRUE	FALSE	FALSE	FALSE	TRUE	FALSE	FALSE
pcodonTTATGG	3971	0.0848868	0.000693312	0.128	0.152	0.123733	0.152254	723	0.231676	0.138465	0	1	1.32603e-20	1	3.66832e-25	MIC not significant	FALSE	TRUE	FALSE	FALSE	FALSE	TRUE	FALSE	FALSE
pcodonTTACTT	3971	0.0845477	0.00024791	0.156	0.146	0.164344	0.162147	772	0.227289	0.134649	0	1	2.70407e-19	1	5.121e-26	MIC not significant	FALSE	TRUE	FALSE	FALSE	FALSE	TRUE	FALSE	FALSE
pcodonTTACTC	3971	0.0821589	0.00130113	0.031	0.066	0.0271393	0.0539517	232	0.273581	0.144753	0.00391089	0.99999	0.000665073	0.99981	2.09119e-09	Monotone	FALSE	TRUE	FALSE	FALSE	FALSE	TRUE	FALSE	FALSE
pcodonTTACTA	3971	0.090676	0.0137263	0.000516129	0.649452	0.000188981	0.658068	420	0.211733	0.123893	0.00439604	1	0.000945453	1	1.07631e-13	Monotone	TRUE	TRUE	FALSE	TRUE	TRUE	TRUE	FALSE	TRUE
pcodonTTACTG	3971	0.0938502	0.0070934	3.22581e-05	0.0111935	4.76087e-06	0.00764397	435	0.250713	0.149482	9.90099e-06	1	4.50342e-09	1	5.8499e-17	Monotone	TRUE	TRUE	FALSE	TRUE	TRUE	TRUE	FALSE	TRUE
pcodonTTACCT	3971	0.0798149	0.000130989	0.428	0.422	0.442513	0.429111	504	0.243157	0.142554	0	1	2.41906e-12	0.999998	1.60027e-18	MIC not significant	FALSE	TRUE	FALSE	FALSE	FALSE	TRUE	FALSE	FALSE
pcodonTTACCC	3971	0.0794127	0.00556922	0.1	0.619	0.100526	0.630687	186	0.23753	0.0791979	0.142	0.991	0.153512	0.983158	9.97751e-05	MIC not significant	FALSE	FALSE	FALSE	FALSE	FALSE	FALSE	FALSE	FALSE
pcodonTTACCA	3971	0.0833707	0.00696037	0.005	0.231	0.00171703	0.252958	151	0.255492	0.147916	0.206158	1	0.220581	0.999993	1.08465e-06	MIC not significant	TRUE	FALSE	FALSE	FALSE	TRUE	FALSE	FALSE	FALSE
pcodonTTACCG	3971	0.0812092	0.00160835	0.163	0.273	0.163499	0.285045	364	0.289936	0.134986	0	0.946752	6.88946e-13	0.931564	4.47716e-13	MIC not significant	FALSE	TRUE	FALSE	FALSE	FALSE	TRUE	FALSE	FALSE
pcodonTTACAT	3971	0.0781991	0.00963841	0.101	1	0.0843873	0.996853	71	0.368432	0.148923	0.029	0.807	0.0137683	0.799368	0.000888226	MIC not significant	FALSE	TRUE	FALSE	FALSE	FALSE	TRUE	FALSE	FALSE
pcodonTTACAC	3971	0.0790173	0.00235537	0.06	0.199	0.0483751	0.20569	80	0.335855	0.156919	0.026	0.912	0.0111521	0.900038	0.000275486	MIC not significant	FALSE	TRUE	FALSE	FALSE	FALSE	TRUE	FALSE	FALSE
pcodonTTACAA	3971	0.0817385	0.00464966	0.001	0.179	0.00140904	0.173118	64	0.507712	0.299727	0.000534653	0.939188	3.14169e-06	0.915453	2.84618e-06	non-significant monotone/non-monotone	TRUE	TRUE	FALSE	FALSE	TRUE	TRUE	FALSE	FALSE
pcodonTTACAG	3971	0.0740808	3.42775e-05	0.594	0.567	0.61689	0.58939	169	0.236386	0.0853072	0.177	0.999	0.184699	0.98705	0.000116611	MIC not significant	FALSE	FALSE	FALSE	FALSE	FALSE	FALSE	FALSE	FALSE
pcodonTTACGT	3971	0.0937714	0.00974854	3.22581e-05	0.0655484	7.3218e-06	0.0610978	464	0.275781	0.172402	0	1	8.42726e-19	0.999996	9.18405e-21	Monotone	TRUE	TRUE	FALSE	TRUE	TRUE	TRUE	FALSE	TRUE
pcodonTTACGC	3971	0.0822902	0.00927564	0.01	0.655	0.00443027	0.669302	145	0.270339	0.0915279	0.04	0.905	0.027228	0.887752	0.000216843	non-significant monotone/non-monotone	TRUE	FALSE	FALSE	FALSE	TRUE	TRUE	FALSE	FALSE
pcodonTTACGA	3971	0.088481	0.00591055	0.002	0.082	0.000976438	0.0754231	346	0.242004	0.089468	0.000584158	0.944634	2.58161e-05	0.929954	1.39424e-08	non-significant monotone/non-monotone	TRUE	TRUE	FALSE	FALSE	TRUE	TRUE	FALSE	FALSE
pcodonTTACGG	3971	0.0884708	0.0126447	0.001	0.683	0.000735881	0.706947	352	0.268482	0.130098	0	0.996644	1.37657e-09	0.989332	2.96386e-12	Monotone	TRUE	TRUE	FALSE	TRUE	TRUE	TRUE	FALSE	TRUE
pcodonTTAATT	3971	0.0893401	2.43255e-05	0.041	0.038	0.0392233	0.0345913	1295	0.202698	0.168185	0	1	1.40605e-34	1	1.06899e-53	Monotone	FALSE	TRUE	FALSE	FALSE	FALSE	TRUE	FALSE	FALSE
pcodonTTAATC	3971	0.0827809	8.06886e-06	0.272	0.247	0.268799	0.245907	672	0.222467	0.155739	0	1	2.97773e-14	1	1.81472e-26	MIC not significant	FALSE	TRUE	FALSE	FALSE	FALSE	TRUE	FALSE	FALSE
pcodonTTAATA	3971	0.0908938	0.00542255	0.002	0.087	0.00251661	0.0853713	648	0.222682	0.126475	0	1	3.23706e-12	1	9.39933e-21	Monotone	TRUE	TRUE	FALSE	TRUE	TRUE	TRUE	FALSE	TRUE
pcodonTTAATG	3971	0.0886747	0.00640012	0.038	0.47	0.0351488	0.49157	1013	0.18916	0.0900697	0	1	6.51397e-15	0.999851	1.57233e-22	Monotone	FALSE	TRUE	FALSE	FALSE	FALSE	TRUE	FALSE	FALSE
pcodonTTAACT	3971	0.0844294	0.00178823	0.067	0.156	0.0700368	0.151363	489	0.280845	0.193831	0	1	3.78243e-21	1	1.33464e-24	MIC not significant	FALSE	TRUE	FALSE	FALSE	FALSE	TRUE	FALSE	FALSE
pcodonTTAACC	3971	0.082789	0.000264201	0.099	0.1	0.0926705	0.0935475	369	0.278095	0.131155	0	0.985248	2.82454e-11	0.972831	7.0602e-13	MIC not significant	FALSE	TRUE	FALSE	FALSE	FALSE	TRUE	FALSE	FALSE
pcodonTTAACA	3971	0.082771	0.00456938	0.01	0.156	0.00839526	0.157411	199	0.213491	0.0748902	0.304911	0.999594	0.331981	0.996522	9.18909e-05	MIC not significant	TRUE	FALSE	FALSE	FALSE	TRUE	FALSE	FALSE	FALSE
pcodonTTAACG	3971	0.0907776	0.00250087	0.001	0.011	0.000740234	0.0059959	556	0.291354	0.227477	0	1	3.22395e-30	1	6.31463e-33	Monotone	TRUE	TRUE	FALSE	TRUE	TRUE	TRUE	FALSE	TRUE
pcodonTTAAAT	3971	0.0771404	0.00443211	0.496	0.909	0.51825	0.905829	305	0.228532	0.0907581	0.0172673	0.999505	0.0088018	0.996812	8.10206e-08	MIC not significant	FALSE	TRUE	FALSE	FALSE	FALSE	TRUE	FALSE	FALSE
pcodonTTAAAC	3971	0.0801642	0.00119112	0.181	0.267	0.190676	0.279845	303	0.269743	0.160388	0.000138614	1	1.51626e-06	0.999996	4.2297e-13	MIC not significant	FALSE	TRUE	FALSE	FALSE	FALSE	TRUE	FALSE	FALSE
pcodonTTAAAA	3971	0.0823203	0.00470754	0.005	0.139	0.00448449	0.137485	140	0.256757	0.0742794	0.126	0.921	0.125828	0.907349	0.00112298	MIC not significant	TRUE	FALSE	FALSE	FALSE	TRUE	FALSE	FALSE	FALSE
pcodonTTAAAG	3971	0.0918298	0.0118671	0.000677419	0.431774	0.000193247	0.439889	528	0.330338	0.261711	0	1	1.09608e-46	1	1.49138e-36	Monotone	TRUE	TRUE	FALSE	TRUE	TRUE	TRUE	FALSE	TRUE
pcodonTTAAGT	3971	0.0866003	0.0091409	0.003	0.402	0.00173728	0.402741	278	0.202349	0.0753435	0.246941	0.99998	0.263008	0.999565	3.39194e-06	MIC not significant	TRUE	FALSE	FALSE	FALSE	TRUE	FALSE	FALSE	FALSE
pcodonTTAAGC	3971	0.0802552	0.00154303	0.17	0.268	0.164229	0.271272	297	0.276649	0.119093	0.001	0.971	9.75463e-07	0.954567	9.90039e-10	MIC not significant	FALSE	TRUE	FALSE	FALSE	FALSE	TRUE	FALSE	FALSE
pcodonTTAAGA	3971	0.0813406	0.00235529	0.057	0.164	0.0515987	0.159493	231	0.268999	0.129142	0.00662376	0.99997	0.00177516	0.998794	1.89714e-08	MIC not significant	FALSE	TRUE	FALSE	FALSE	FALSE	TRUE	FALSE	FALSE
pcodonTTAAGG	3971	0.083333	0.000374242	0.152	0.162	0.163471	0.17082	528	0.260836	0.187283	0	1	9.82489e-18	1	1.64276e-25	MIC not significant	FALSE	TRUE	FALSE	FALSE	FALSE	TRUE	FALSE	FALSE
pcodonTTAGTC	3971	0.0842243	0.00138503	0.075	0.123	0.0651458	0.117921	447	0.225018	0.0962979	0.00029703	0.999525	9.14139e-06	0.996798	1.9618e-11	MIC not significant	FALSE	TRUE	FALSE	FALSE	FALSE	TRUE	FALSE	FALSE
pcodonTTAGTG	3971	0.0915156	0.00765754	0.000516129	0.0909032	0.00022952	0.088084	503	0.197905	0.091724	0.00348515	1	0.000723996	0.999984	3.94421e-12	Monotone	TRUE	TRUE	FALSE	TRUE	TRUE	TRUE	FALSE	TRUE
pcodonTTAGCT	3971	0.0944591	0.0141757	0	0.269485	1.21363e-06	0.275356	414	0.260761	0.131792	0	0.999752	9.32206e-11	0.99774	2.42164e-14	Monotone	TRUE	TRUE	FALSE	TRUE	TRUE	TRUE	FALSE	TRUE
pcodonTTAGCC	3971	0.0761299	0.000500417	0.544	0.576	0.537492	0.566648	258	0.275384	0.116233	0.000207921	0.943089	3.24644e-06	0.927145	1.9231e-08	MIC not significant	FALSE	TRUE	FALSE	FALSE	FALSE	TRUE	FALSE	FALSE
pcodonTTAGCA	3971	0.083081	0.00642684	0.005	0.269	0.00471811	0.271577	171	0.26441	0.0934599	0.032	0.95	0.022113	0.918458	4.77931e-05	non-significant monotone/non-monotone	TRUE	TRUE	FALSE	FALSE	TRUE	TRUE	FALSE	FALSE
pcodonTTAGCG	3971	0.0818133	0.000715041	0.117	0.148	0.12498	0.154732	372	0.230159	0.11586	0.00180198	1	0.000235049	0.99997	1.52588e-11	MIC not significant	FALSE	TRUE	FALSE	FALSE	FALSE	TRUE	FALSE	FALSE
pcodonTTAGAC	3971	0.0711691	0.000365484	0.915	0.922	0.90471	0.914404	99	0.265846	0.11474	0.192455	0.99601	0.205924	0.985687	0.000604665	MIC not significant	FALSE	FALSE	FALSE	FALSE	FALSE	FALSE	FALSE	FALSE
pcodonTTAGAA	3971	0.076497	0.0038505	0.388	0.8	0.407859	0.80865	221	0.341545	0.184147	0	0.985376	1.59405e-11	0.971711	2.58133e-11	MIC not significant	FALSE	TRUE	FALSE	FALSE	FALSE	TRUE	FALSE	FALSE
pcodonTTAGAG	3971	0.0780473	0.000897752	0.157	0.199	0.158324	0.215857	174	0.281107	0.144921	0.0263465	0.99995	0.0148732	0.999555	2.19721e-07	MIC not significant	FALSE	TRUE	FALSE	FALSE	FALSE	TRUE	FALSE	FALSE
pcodonTTAGGT	3971	0.0896869	0.0103879	0.004	0.54	0.00254306	0.554469	557	0.260605	0.121375	0	0.950733	6.32851e-19	0.937228	2.44114e-17	Monotone	TRUE	TRUE	FALSE	FALSE	TRUE	TRUE	FALSE	FALSE
pcodonTTAGGC	3971	0.0825741	8.52484e-05	0.152	0.147	0.14614	0.134146	479	0.234261	0.107832	9.90099e-06	0.999752	3.46981e-08	0.997973	1.66125e-13	MIC not significant	FALSE	TRUE	FALSE	FALSE	FALSE	TRUE	FALSE	FALSE
pcodonTTAGGA	3971	0.0911281	4.34901e-05	0.00180645	0.00148387	0.000931816	0.0007364	607	0.248964	0.166351	0	1	9.85851e-19	1	9.86972e-26	Monotone	TRUE	TRUE	FALSE	TRUE	TRUE	TRUE	FALSE	TRUE
pcodonTTAGGG	3971	0.0863856	0.00775707	0.067	0.742	0.0621319	0.74918	716	0.163653	0.0639552	0.0283069	1	0.0187578	0.999992	6.5529e-12	MIC not significant	FALSE	TRUE	FALSE	FALSE	FALSE	TRUE	FALSE	FALSE
pcodonTTGTTT	3971	0.129181	0.0377102	0	0.00618812	2.25644e-41	0.00411805	1066	0.18585	0.0890594	0	1	4.37681e-15	0.999933	2.28117e-23	Monotone	TRUE	TRUE	FALSE	TRUE	TRUE	TRUE	FALSE	TRUE
pcodonTTGTTC	3971	0.111503	0.0279445	0	0.24599	1.49266e-18	0.251538	810	0.212039	0.130875	0	1	1.30147e-16	1	1.88555e-26	Monotone	TRUE	TRUE	FALSE	TRUE	TRUE	TRUE	FALSE	TRUE
pcodonTTGTTA	3971	0.0981873	0.0152375	0	0.255713	3.20259e-07	0.261455	711	0.232771	0.142586	0	1	6.62714e-20	1	1.62899e-25	Monotone	TRUE	TRUE	FALSE	TRUE	TRUE	TRUE	FALSE	TRUE
pcodonTTGTTG	3971	0.147218	0.0689529	0	0.877168	1.31163e-77	0.874527	1055	0.152481	0.0155456	0.002	0.099	0.000721004	0.0996683	4.89017e-05	non-significant monotone/non-monotone	TRUE	TRUE	FALSE	FALSE	TRUE	TRUE	FALSE	FALSE
pcodonTTGTCT	3971	0.120311	0.0339816	0	0.0270792	2.00055e-32	0.0228541	529	0.218685	0.0631234	2.9703e-05	0.515901	2.69204e-07	0.542077	4.65172e-09	non-significant monotone/non-monotone	TRUE	TRUE	FALSE	FALSE	TRUE	TRUE	FALSE	FALSE
pcodonTTGTCC	3971	0.0933448	0.0160397	1.9802e-05	0.54605	2.4373e-06	0.558415	369	0.201249	0.0534675	0.086	0.984	0.0694827	0.96804	7.20015e-06	MIC not significant	TRUE	FALSE	FALSE	FALSE	TRUE	FALSE	FALSE	FALSE
pcodonTTGTCA	3971	0.0900974	0.0207501	0.000129032	0.986806	1.43158e-05	0.980719	255	0.316934	0.149383	0	0.876941	3.43086e-11	0.867646	1.64045e-10	non-significant monotone/non-monotone	TRUE	TRUE	FALSE	FALSE	TRUE	TRUE	FALSE	FALSE
pcodonTTGTCG	3971	0.102405	0.0232887	0	0.559137	4.0118e-11	0.57015	558	0.197513	0.0740953	0.0020396	0.999653	0.000354005	0.997665	6.17306e-11	Monotone	TRUE	TRUE	FALSE	TRUE	TRUE	TRUE	FALSE	TRUE
pcodonTTGTAT	3971	0.106991	0.0276687	0	0.511455	1.67517e-15	0.522227	533	0.209043	0.0803452	0.001	0.996	1.22472e-05	0.988983	2.63163e-11	Monotone	TRUE	TRUE	FALSE	TRUE	TRUE	TRUE	FALSE	TRUE
pcodonTTGTAC	3971	0.104746	0.0334175	0	0.982079	1.33481e-15	0.975999	384	0.192474	0.0451935	0.088	0.96	0.0827775	0.941313	2.66468e-05	MIC not significant	TRUE	FALSE	FALSE	FALSE	TRUE	FALSE	FALSE	FALSE
pcodonTTGTAA	3971	0.092213	0.0187655	2.9703e-05	0.805178	1.10569e-06	0.808168	267	0.290249	0.146419	8.91089e-05	0.999327	4.03356e-07	0.996029	9.72812e-11	Monotone	TRUE	TRUE	FALSE	TRUE	TRUE	TRUE	FALSE	TRUE
pcodonTTGTAG	3971	0.0989794	0.0246925	0	0.937208	1.13473e-08	0.932472	524	0.220058	0.0944337	5.94059e-05	0.999426	3.52356e-07	0.996919	6.36648e-13	Monotone	TRUE	TRUE	FALSE	TRUE	TRUE	TRUE	FALSE	TRUE
pcodonTTGTGT	3971	0.118982	0.0437158	0	0.905079	6.97339e-30	0.901783	553	0.211294	0.0934748	0.000138614	0.99999	4.51576e-06	0.999707	1.98001e-13	Monotone	TRUE	TRUE	FALSE	TRUE	TRUE	TRUE	FALSE	TRUE
pcodonTTGTGC	3971	0.0939884	0.0138675	6.45161e-05	0.449484	2.44797e-05	0.461964	562	0.224798	0.115914	9.90099e-06	1	2.29308e-09	0.999968	1.01932e-16	Monotone	TRUE	TRUE	FALSE	TRUE	TRUE	TRUE	FALSE	TRUE
pcodonTTGTGA	3971	0.103802	0.0229745	0	0.354059	1.73129e-12	0.362269	543	0.18996	0.0553033	0.008	0.97	0.00192921	0.947478	2.93517e-08	Monotone	TRUE	TRUE	FALSE	TRUE	TRUE	TRUE	FALSE	FALSE
pcodonTTGTGG	3971	0.110409	0.0296659	0	0.591069	8.29628e-17	0.60345	891	0.169217	0.0625111	0.000584158	0.999941	4.32407e-05	0.999323	3.64167e-14	Monotone	TRUE	TRUE	FALSE	TRUE	TRUE	TRUE	FALSE	TRUE
pcodonTTGCTT	3971	0.098418	0.0239215	0	0.96097	1.50016e-07	0.955458	646	0.192076	0.048888	0.001	0.703	5.52663e-05	0.706326	1.35241e-08	non-significant monotone/non-monotone	TRUE	TRUE	FALSE	FALSE	TRUE	TRUE	FALSE	FALSE
pcodonTTGCTC	3971	0.0894687	0.0123079	3.22581e-05	0.292355	1.13694e-05	0.302625	222	0.248677	0.143953	0.0195149	1	0.0101182	0.999993	5.18713e-09	Monotone	TRUE	TRUE	FALSE	TRUE	TRUE	TRUE	FALSE	TRUE
pcodonTTGCTA	3971	0.0903509	0.0151728	3.22581e-05	0.634774	1.75556e-05	0.644224	270	0.329686	0.126995	0	0.258168	3.54914e-13	0.277462	1.66481e-09	non-significant monotone/non-monotone	TRUE	TRUE	FALSE	FALSE	TRUE	TRUE	FALSE	FALSE
pcodonTTGCTG	3971	0.10492	0.0271861	0	0.525238	1.09657e-15	0.537604	393	0.254161	0.0803304	1.9802e-05	0.51205	1.07537e-07	0.538398	1.07475e-08	non-significant monotone/non-monotone	TRUE	TRUE	FALSE	FALSE	TRUE	TRUE	FALSE	FALSE
pcodonTTGCCT	3971	0.0916292	0.0104039	0.001	0.272	0.000235236	0.281822	521	0.214355	0.0983144	0.000237624	1	4.81319e-06	0.99979	2.38402e-13	Monotone	TRUE	TRUE	FALSE	TRUE	TRUE	TRUE	FALSE	TRUE
pcodonTTGCCC	3971	0.0776996	0.00891551	0.223	0.984	0.226707	0.971805	190	0.227386	0.0283192	0.196	0.542	0.209809	0.587594	0.0202927	MIC not significant	FALSE	FALSE	FALSE	FALSE	FALSE	FALSE	FALSE	FALSE
pcodonTTGCCA	3971	0.0903095	0.0135255	9.90099e-06	0.312911	2.16985e-06	0.322111	210	0.280459	0.0659762	0.003	0.317	0.000832467	0.342696	0.000167653	non-significant monotone/non-monotone	TRUE	TRUE	FALSE	FALSE	TRUE	TRUE	FALSE	FALSE
pcodonTTGCCG	3971	0.0930348	0.015544	6.45161e-05	0.632161	1.8409e-05	0.64082	458	0.223129	0.128652	0.000128713	1	3.43808e-06	1	2.37108e-15	Monotone	TRUE	TRUE	FALSE	TRUE	TRUE	TRUE	FALSE	TRUE
pcodonTTGCAT	3971	0.0840546	0.0107109	0.001	0.638	0.000208596	0.650233	99	0.326055	0.148253	0.015	0.951	0.00565989	0.922368	8.31095e-05	Monotone	TRUE	TRUE	FALSE	FALSE	TRUE	TRUE	FALSE	FALSE
pcodonTTGCAC	3971	0.0811661	0.0107874	0.008	0.972	0.00601246	0.965069	82	0.292078	0.0179944	0.313	0.365	0.352029	0.403826	0.229554	MIC not significant	TRUE	FALSE	FALSE	FALSE	TRUE	FALSE	FALSE	FALSE
pcodonTTGCAG	3971	0.0849939	0.00711136	0.001	0.173	0.000810973	0.175322	179	0.237946	0.0748043	0.231	0.996	0.25716	0.987976	0.000211825	MIC not significant	TRUE	FALSE	FALSE	FALSE	TRUE	FALSE	FALSE	FALSE
pcodonTTGCGT	3971	0.0895868	0.0171406	0.000709677	0.937613	0.000176973	0.931812	340	0.22085	0.0618089	0.018	0.925	0.00730241	0.90349	3.47749e-06	non-significant monotone/non-monotone	TRUE	TRUE	FALSE	FALSE	TRUE	TRUE	FALSE	FALSE
pcodonTTGCGC	3971	0.081711	0.00895631	0.02	0.741	0.0161597	0.748289	173	0.31237	0.1001	0.00326733	0.625337	0.000440657	0.647756	2.22823e-05	non-significant monotone/non-monotone	FALSE	TRUE	FALSE	FALSE	TRUE	TRUE	FALSE	FALSE
pcodonTTGCGA	3971	0.0921515	0.0169491	3.22581e-05	0.662516	2.54511e-06	0.671611	291	0.280232	0.134218	7.92079e-05	0.99903	1.00267e-06	0.994842	1.13142e-10	Monotone	TRUE	TRUE	FALSE	TRUE	TRUE	TRUE	FALSE	TRUE
pcodonTTGCGG	3971	0.0937414	0.0204065	0	0.888327	5.61917e-07	0.885227	333	0.272742	0.141738	9.90099e-06	0.99995	3.25481e-08	0.999164	1.18162e-12	Monotone	TRUE	TRUE	FALSE	TRUE	TRUE	TRUE	FALSE	TRUE
pcodonTTGATT	3971	0.135043	0.0360622	0	1.9802e-05	1.96385e-49	3.33141e-06	1425	0.151915	0.0616177	0	1	6.63156e-08	0.999979	1.87987e-21	Monotone	TRUE	TRUE	FALSE	TRUE	TRUE	TRUE	FALSE	TRUE
pcodonTTGATC	3971	0.1064	0.0289115	0	0.859525	3.03111e-13	0.857779	799	0.164079	0.0561163	0.009	0.99998	0.00382143	0.999501	1.1826e-11	Monotone	TRUE	TRUE	FALSE	TRUE	TRUE	TRUE	FALSE	TRUE
pcodonTTGATA	3971	0.103376	0.0256529	0	0.824436	7.25372e-11	0.824965	746	0.222219	0.0746585	0	0.265099	7.89838e-17	0.280157	3.06825e-14	non-significant monotone/non-monotone	TRUE	TRUE	FALSE	FALSE	TRUE	TRUE	FALSE	FALSE
pcodonTTGATG	3971	0.133379	0.0461781	0	0.0988235	7.05073e-48	0.0954572	1174	0.13958	0.0471361	0.0187624	1	0.0109912	0.999984	5.44035e-14	Monotone	TRUE	TRUE	FALSE	TRUE	TRUE	TRUE	FALSE	TRUE
pcodonTTGACT	3971	0.098545	0.0203278	0	0.679525	4.44683e-08	0.687461	576	0.243565	0.136353	0	1	1.1059e-15	0.999971	4.7735e-20	Monotone	TRUE	TRUE	FALSE	TRUE	TRUE	TRUE	FALSE	TRUE
pcodonTTGACC	3971	0.0804889	0.00407844	0.315	0.731	0.325356	0.749543	454	0.204125	0.0875871	0.00551485	1	0.0016496	0.999829	1.24945e-10	MIC not significant	FALSE	TRUE	FALSE	FALSE	FALSE	TRUE	FALSE	FALSE
pcodonTTGACA	3971	0.0838007	0.00800501	0.018	0.531	0.0129005	0.548026	257	0.215568	0.0798168	0.09	0.999	0.0902975	0.99634	4.20234e-06	MIC not significant	TRUE	FALSE	FALSE	FALSE	TRUE	FALSE	FALSE	FALSE
pcodonTTGACG	3971	0.0838663	0.00131123	0.194	0.27	0.192397	0.284517	641	0.24325	0.128738	0	0.99998	4.29512e-18	0.999612	6.56419e-21	MIC not significant	FALSE	TRUE	FALSE	FALSE	FALSE	TRUE	FALSE	FALSE
pcodonTTGAAT	3971	0.104506	0.0245223	0	0.433515	3.74954e-13	0.443178	530	0.23406	0.112019	0	0.999713	1.23302e-10	0.998152	2.44393e-15	Monotone	TRUE	TRUE	FALSE	TRUE	TRUE	TRUE	FALSE	TRUE
pcodonTTGAAC	3971	0.0933104	0.0138322	3.22581e-05	0.381097	1.03267e-05	0.392693	440	0.219452	0.0604094	0.002	0.704	9.29806e-05	0.727003	1.77739e-07	non-significant monotone/non-monotone	TRUE	TRUE	FALSE	FALSE	TRUE	TRUE	FALSE	FALSE
pcodonTTGAAA	3971	0.0826853	0.010169	0.058	0.93	0.0545536	0.917004	329	0.298451	0.127909	0	0.781772	5.92836e-12	0.785473	2.3128e-11	MIC not significant	FALSE	TRUE	FALSE	FALSE	FALSE	TRUE	FALSE	FALSE
pcodonTTGAAG	3971	0.0895069	0.00406914	0.012	0.107	0.00903536	0.105149	817	0.212157	0.114627	0	1	3.06433e-17	0.99999	2.32503e-23	Monotone	TRUE	TRUE	FALSE	TRUE	TRUE	TRUE	FALSE	TRUE
pcodonTTGAGT	3971	0.101149	0.0244789	0	0.642277	4.55245e-12	0.652079	387	0.239008	0.0859971	0.000227723	0.884465	2.44473e-06	0.874453	4.10096e-09	non-significant monotone/non-monotone	TRUE	TRUE	FALSE	FALSE	TRUE	TRUE	FALSE	FALSE
pcodonTTGAGC	3971	0.0814328	0.00264542	0.157	0.387	0.171282	0.40087	397	0.243438	0.117768	0.000247525	0.99995	2.28174e-06	0.999571	2.05386e-12	MIC not significant	FALSE	TRUE	FALSE	FALSE	FALSE	TRUE	FALSE	FALSE
pcodonTTGAGA	3971	0.0824172	0.00860749	0.085	0.873	0.0835446	0.872155	348	0.308045	0.165871	0	0.991772	8.10299e-17	0.981588	2.45164e-15	MIC not significant	FALSE	TRUE	FALSE	FALSE	FALSE	TRUE	FALSE	FALSE
pcodonTTGAGG	3971	0.100248	0.0173704	0	0.281178	1.61145e-08	0.28753	750	0.190958	0.0776983	9.90099e-06	0.999683	1.88483e-07	0.998218	7.50797e-15	Monotone	TRUE	TRUE	FALSE	TRUE	TRUE	TRUE	FALSE	TRUE
pcodonTTGGTC	3971	0.0925029	0.00909247	9.67742e-05	0.0606774	1.18118e-05	0.0559267	397	0.27014	0.134549	0	0.999188	7.04865e-11	0.995905	4.34059e-14	Monotone	TRUE	TRUE	FALSE	TRUE	TRUE	TRUE	FALSE	TRUE
pcodonTTGGTG	3971	0.0963617	0.0221862	1.9802e-05	0.944396	8.17194e-07	0.939232	535	0.212363	0.092417	7.92079e-05	0.999911	1.70218e-06	0.998779	6.67689e-13	Monotone	TRUE	TRUE	FALSE	TRUE	TRUE	TRUE	FALSE	TRUE
pcodonTTGGCT	3971	0.113434	0.0410411	0	0.991901	7.49783e-22	0.989481	625	0.204231	0.0882698	2.9703e-05	0.999822	1.37715e-07	0.998567	3.33488e-14	Monotone	TRUE	TRUE	FALSE	TRUE	TRUE	TRUE	FALSE	TRUE
pcodonTTGGCC	3971	0.100305	0.0164815	0	0.0763663	2.8765e-10	0.0723238	468	0.22948	0.120669	9.90099e-05	1	1.54073e-06	0.999995	1.01798e-14	Monotone	TRUE	TRUE	FALSE	TRUE	TRUE	TRUE	FALSE	TRUE
pcodonTTGGCA	3971	0.0950194	0.0211155	0	0.810871	3.63027e-08	0.811895	299	0.253873	0.098532	0.001	0.985	9.6268e-05	0.969989	2.92501e-08	Monotone	TRUE	TRUE	FALSE	TRUE	TRUE	TRUE	FALSE	TRUE
pcodonTTGGCG	3971	0.110045	0.0314341	0	0.72598	1.4087e-17	0.732041	703	0.17106	0.0353068	0.012	0.804	0.00538516	0.804911	5.22314e-07	non-significant monotone/non-monotone	TRUE	TRUE	FALSE	FALSE	TRUE	TRUE	FALSE	FALSE
pcodonTTGGAC	3971	0.0853706	0.0123923	0.001	0.667	9.20002e-05	0.694919	132	0.341805	0.258964	0.00262376	1	0.000240888	1	4.65694e-10	Monotone	TRUE	TRUE	FALSE	TRUE	TRUE	TRUE	FALSE	TRUE
pcodonTTGGAA	3971	0.0889782	0.00707005	0.000645161	0.0703226	0.000186356	0.0665029	308	0.230974	0.079778	0.008	0.987	0.00318369	0.969791	4.6599e-07	Monotone	TRUE	TRUE	FALSE	TRUE	TRUE	TRUE	FALSE	TRUE
pcodonTTGGAG	3971	0.0824339	0.00926814	0.01	0.736	0.0107535	0.74925	201	0.280661	0.0787413	0.011	0.685	0.00289895	0.687475	5.46321e-05	non-significant monotone/non-monotone	TRUE	TRUE	FALSE	FALSE	TRUE	TRUE	FALSE	FALSE
pcodonTTGGGT	3971	0.109544	0.0333865	0	0.922765	1.08682e-16	0.919166	748	0.181651	0.0568494	0.000425743	0.975347	2.31624e-05	0.962322	3.95944e-11	Monotone	TRUE	TRUE	FALSE	TRUE	TRUE	TRUE	FALSE	FALSE
pcodonTTGGGC	3971	0.100807	0.0121878	0	0.00830693	1.07553e-09	0.00575955	581	0.217655	0.104936	0	1	3.20384e-09	0.999741	1.16291e-15	Monotone	TRUE	TRUE	FALSE	TRUE	TRUE	TRUE	FALSE	TRUE
pcodonTTGGGA	3971	0.10661	0.0228714	0	0.22895	1.79401e-13	0.233126	803	0.203433	0.109385	0	1	6.48948e-13	0.999999	5.986e-22	Monotone	TRUE	TRUE	FALSE	TRUE	TRUE	TRUE	FALSE	TRUE
pcodonTTGGGG	3971	0.116834	0.0466005	0	0.999594	2.12734e-25	0.999011	737	0.193268	0.0648011	9.90099e-06	0.946792	2.52713e-07	0.933214	2.30115e-12	non-significant monotone/non-monotone	TRUE	TRUE	FALSE	FALSE	TRUE	TRUE	FALSE	FALSE
pcodonTCTTTT	3971	0.103725	0.0303326	0	0.982188	1.05888e-11	0.978287	636	0.211194	0.0872561	0	0.998842	2.27354e-08	0.99491	2.84494e-14	Monotone	TRUE	TRUE	FALSE	TRUE	TRUE	TRUE	FALSE	TRUE
pcodonTCTTTC	3971	0.0877515	0.0121263	0.005	0.794	0.0036511	0.805316	437	0.232628	0.0915852	0.000188119	0.989248	3.09428e-06	0.978148	1.0447e-10	Monotone	TRUE	TRUE	FALSE	TRUE	TRUE	TRUE	FALSE	TRUE
pcodonTCTTTA	3971	0.0906926	0.00483741	0.001	0.037	0.000605068	0.0280297	523	0.243376	0.121881	0	0.999931	2.96585e-12	0.998976	1.95094e-16	Monotone	TRUE	TRUE	FALSE	TRUE	TRUE	TRUE	FALSE	TRUE
pcodonTCTTTG	3971	0.114359	0.0366498	0	0.770238	2.96138e-23	0.773059	618	0.173464	0.0657893	0.0277228	0.99999	0.0180686	0.999946	9.67037e-11	Monotone	TRUE	TRUE	FALSE	TRUE	TRUE	TRUE	FALSE	TRUE
pcodonTCTTCT	3971	0.0955629	0.0168601	0	0.343078	3.9341e-08	0.353129	342	0.280946	0.120328	0	0.864842	1.23046e-10	0.857083	4.18205e-11	non-significant monotone/non-monotone	TRUE	TRUE	FALSE	FALSE	TRUE	TRUE	FALSE	FALSE
pcodonTCTTCC	3971	0.0805099	0.00215677	0.034	0.105	0.0282067	0.10302	173	0.281918	0.0731979	0.025	0.664	0.0152784	0.686251	0.000318067	non-significant monotone/non-monotone	FALSE	TRUE	FALSE	FALSE	FALSE	TRUE	FALSE	FALSE
pcodonTCTTCA	3971	0.0760381	0.00870485	0.373	0.996	0.36954	0.992028	179	0.262942	0.115974	0.0578218	0.999663	0.0462589	0.997559	3.09336e-06	MIC not significant	FALSE	FALSE	FALSE	FALSE	FALSE	FALSE	FALSE	FALSE
pcodonTCTTCG	3971	0.0849684	0.0113046	0.021	0.865	0.0121798	0.862578	331	0.232592	0.0740466	0.011	0.946	0.00265151	0.929558	4.97824e-07	non-significant monotone/non-monotone	FALSE	TRUE	FALSE	FALSE	TRUE	TRUE	FALSE	FALSE
pcodonTCTTAT	3971	0.08986	0.00615003	0.0016129	0.0821613	0.000882067	0.0784645	466	0.251439	0.127188	0	0.999574	1.4366e-12	0.997304	2.0121e-15	Monotone	TRUE	TRUE	FALSE	TRUE	TRUE	TRUE	FALSE	TRUE
pcodonTCTTAC	3971	0.0812561	0.0112784	0.028	0.942	0.0263734	0.937442	188	0.288684	0.101029	0.003	0.807	0.000411548	0.807501	8.79283e-06	non-significant monotone/non-monotone	FALSE	TRUE	FALSE	FALSE	FALSE	TRUE	FALSE	FALSE
pcodonTCTTAA	3971	0.0841904	0.00831915	0.007	0.463	0.00520889	0.466104	224	0.252268	0.0713633	0.006	0.751	0.00336317	0.755969	5.12953e-05	non-significant monotone/non-monotone	TRUE	TRUE	FALSE	FALSE	TRUE	TRUE	FALSE	FALSE
pcodonTCTTAG	3971	0.0845492	0.013308	0.012	0.958	0.00955123	0.960099	299	0.259552	0.133856	0.000752475	1	3.77764e-05	0.999776	6.68412e-11	Monotone	TRUE	TRUE	FALSE	TRUE	TRUE	TRUE	FALSE	TRUE
pcodonTCTTGT	3971	0.0989183	0.0229943	0	0.654752	6.15797e-11	0.662946	331	0.288186	0.124436	0	0.884347	1.92892e-10	0.874629	3.91852e-11	non-significant monotone/non-monotone	TRUE	TRUE	FALSE	FALSE	TRUE	TRUE	FALSE	FALSE
pcodonTCTTGC	3971	0.0783994	0.00461173	0.187	0.65	0.189055	0.665551	200	0.315323	0.159502	0.000405941	0.998713	1.23932e-05	0.993725	4.6778e-09	MIC not significant	FALSE	TRUE	FALSE	FALSE	FALSE	TRUE	FALSE	FALSE
pcodonTCTTGA	3971	0.0890187	0.00808265	0.000935484	0.158065	0.000422529	0.157396	350	0.253034	0.14115	4.9505e-05	1	5.42884e-07	0.999973	3.55128e-13	Monotone	TRUE	TRUE	FALSE	TRUE	TRUE	TRUE	FALSE	TRUE
pcodonTCTTGG	3971	0.0877649	0.00665488	0.005	0.24	0.00398727	0.237582	452	0.234745	0.0860906	1.9802e-05	0.878663	1.0033e-07	0.870257	2.00062e-10	non-significant monotone/non-monotone	TRUE	TRUE	FALSE	FALSE	TRUE	TRUE	FALSE	FALSE
pcodonTCTCTT	3971	0.0900617	0.0103635	0.000580645	0.259613	0.000133109	0.266965	352	0.23651	0.086773	0.001	0.961	3.40663e-05	0.939854	1.77642e-08	Monotone	TRUE	TRUE	FALSE	FALSE	TRUE	TRUE	FALSE	FALSE
pcodonTCTCTC	3971	0.0762267	0.00351975	0.273	0.731	0.287861	0.733297	121	0.272749	0.085498	0.082	0.871	0.0752717	0.863607	0.00113613	MIC not significant	FALSE	FALSE	FALSE	FALSE	FALSE	FALSE	FALSE	FALSE
pcodonTCTCTA	3971	0.0851522	0.00781661	0.002	0.216	0.00078884	0.217401	189	0.321004	0.190077	0.000217822	1	1.46251e-06	0.999392	3.59887e-10	Monotone	TRUE	TRUE	FALSE	TRUE	TRUE	TRUE	FALSE	TRUE
pcodonTCTCTG	3971	0.0814372	0.0090863	0.07	0.889	0.0683896	0.881385	254	0.259719	0.0988235	0.00233663	0.947327	0.000244633	0.930819	3.12623e-07	MIC not significant	FALSE	TRUE	FALSE	FALSE	FALSE	TRUE	FALSE	FALSE
pcodonTCTCCT	3971	0.0866515	0.00857563	0.008	0.458	0.00452613	0.4728	377	0.236443	0.104536	0.000514851	0.999554	2.11149e-05	0.996969	1.27255e-10	Monotone	TRUE	TRUE	FALSE	TRUE	TRUE	TRUE	FALSE	TRUE
pcodonTCTCCC	3971	0.0784374	0.00798674	0.082	0.92	0.0784298	0.910192	125	0.240971	0.0476634	0.564	0.939	0.584975	0.92976	0.0144473	MIC not significant	FALSE	FALSE	FALSE	FALSE	FALSE	FALSE	FALSE	FALSE
pcodonTCTCCA	3971	0.0813717	0.00582717	0.012	0.31	0.00751388	0.345122	111	0.439986	0.179028	3.9604e-05	0.212545	3.43167e-09	0.229136	3.71752e-06	non-significant monotone/non-monotone	TRUE	TRUE	FALSE	FALSE	TRUE	TRUE	FALSE	FALSE
pcodonTCTCCG	3971	0.0876934	0.0153485	0.001	0.877	0.000316967	0.872034	261	0.209708	0.0365176	0.318	0.905	0.34569	0.890779	0.00192831	MIC not significant	TRUE	FALSE	FALSE	FALSE	TRUE	FALSE	FALSE	FALSE
pcodonTCTCAT	3971	0.0754824	0.00310615	0.478	0.985	0.522805	0.960242	46	0.26294	0.127372	0.374	0.983	0.448721	0.958954	0.0153573	MIC not significant	FALSE	FALSE	FALSE	FALSE	FALSE	FALSE	FALSE	FALSE
pcodonTCTCAG	3971	0.0765329	0.000484153	0.242	0.268	0.245945	0.2776	75	0.37077	0.194229	0.015	0.968	0.00367625	0.952332	7.58461e-05	MIC not significant	FALSE	TRUE	FALSE	FALSE	FALSE	TRUE	FALSE	FALSE
pcodonTCTCGT	3971	0.0848867	0.00716792	0.003	0.222	0.00165509	0.225925	212	0.22197	0.0785524	0.241198	0.999614	0.258906	0.996996	3.47343e-05	MIC not significant	TRUE	FALSE	FALSE	FALSE	TRUE	FALSE	FALSE	FALSE
pcodonTCTCGC	3971	0.0798354	0.00659449	0.014	0.864	0.00972268	0.857732	54	0.379149	0.0747132	0.043	0.164	0.0244022	0.18406	0.0458362	non-significant monotone/non-monotone	TRUE	FALSE	FALSE	FALSE	TRUE	TRUE	FALSE	FALSE
pcodonTCTCGA	3971	0.0800343	0.00700425	0.076	0.685	0.0558829	0.704001	166	0.272479	0.110452	0.024	0.986	0.00877851	0.97667	1.2166e-05	MIC not significant	FALSE	TRUE	FALSE	FALSE	FALSE	TRUE	FALSE	FALSE
pcodonTCTCGG	3971	0.0827304	0.00691693	0.009	0.341	0.00439395	0.350963	159	0.297177	0.131335	0.006	0.987	0.00207601	0.975725	2.67604e-06	Monotone	TRUE	TRUE	FALSE	TRUE	TRUE	TRUE	FALSE	TRUE
pcodonTCTATT	3971	0.0937285	0.0119288	0.000354839	0.31929	6.44549e-05	0.327328	619	0.208189	0.122661	2.9703e-05	1	4.46703e-08	1	2.65762e-19	Monotone	TRUE	TRUE	FALSE	TRUE	TRUE	TRUE	FALSE	TRUE
pcodonTCTATC	3971	0.0891892	0.0111122	0.000354839	0.289677	7.46167e-05	0.299096	268	0.307419	0.123959	9.90099e-06	0.686446	1.94916e-09	0.702279	3.0718e-09	non-significant monotone/non-monotone	TRUE	TRUE	FALSE	FALSE	TRUE	TRUE	FALSE	FALSE
pcodonTCTATA	3971	0.0884986	0.0159976	0.003	0.915	0.000565769	0.908849	308	0.244745	0.108606	0.00258416	0.999653	0.000329289	0.997156	3.09426e-09	Monotone	TRUE	TRUE	FALSE	TRUE	TRUE	TRUE	FALSE	TRUE
pcodonTCTATG	3971	0.0905007	0.0170934	0.003	0.967	0.00130633	0.960569	544	0.209191	0.0926137	0.000108911	0.99996	1.86286e-06	0.999212	4.03269e-13	Monotone	TRUE	TRUE	FALSE	TRUE	TRUE	TRUE	FALSE	TRUE
pcodonTCTACT	3971	0.0865516	0.0113627	0.004	0.71	0.0028037	0.724355	324	0.202045	0.0776939	0.207238	0.99999	0.217137	0.999893	3.40954e-07	MIC not significant	TRUE	FALSE	FALSE	FALSE	TRUE	FALSE	FALSE	FALSE
pcodonTCTACC	3971	0.0806999	0.00288582	0.035	0.115	0.0231223	0.126548	156	0.336186	0.18692	0.000752475	0.999505	2.32736e-05	0.996348	1.73995e-08	Monotone	FALSE	TRUE	FALSE	FALSE	FALSE	TRUE	FALSE	FALSE
pcodonTCTACA	3971	0.0791828	0.00180492	0.058	0.144	0.0546708	0.145416	121	0.350248	0.116279	0.00121782	0.299495	3.97042e-05	0.329945	0.000129502	MIC not significant	FALSE	TRUE	FALSE	FALSE	FALSE	TRUE	FALSE	FALSE
pcodonTCTACG	3971	0.0817237	0.00413497	0.055	0.309	0.0510868	0.316901	249	0.303065	0.17738	3.9604e-05	0.99998	1.57376e-08	0.999601	3.98194e-12	MIC not significant	FALSE	TRUE	FALSE	FALSE	FALSE	TRUE	FALSE	FALSE
pcodonTCTAAT	3971	0.0807964	0.00801693	0.067	0.803	0.0654531	0.811487	231	0.288855	0.0947202	0.001	0.663	4.21496e-05	0.68371	1.85584e-06	MIC not significant	FALSE	TRUE	FALSE	FALSE	FALSE	TRUE	FALSE	FALSE
pcodonTCTAAC	3971	0.0772806	0.00429228	0.252	0.705	0.23961	0.715121	167	0.301224	0.127532	0.006	0.943	0.000422306	0.918496	2.1641e-06	MIC not significant	FALSE	TRUE	FALSE	FALSE	FALSE	TRUE	FALSE	FALSE
pcodonTCTAAA	3971	0.0775207	0.00516312	0.131	0.743	0.138286	0.744454	126	0.290074	0.118513	0.083	0.996	0.0686697	0.982843	7.91015e-05	MIC not significant	FALSE	FALSE	FALSE	FALSE	FALSE	FALSE	FALSE	FALSE
pcodonTCTAAG	3971	0.0766998	2.48455e-07	0.664	0.628	0.672365	0.64439	384	0.306936	0.217392	0	1	2.8305e-20	1	4.02666e-22	MIC not significant	FALSE	TRUE	FALSE	FALSE	FALSE	TRUE	FALSE	FALSE
pcodonTCTAGT	3971	0.0805538	0.00806705	0.088	0.83	0.0841324	0.828947	237	0.268927	0.174244	0.0040495	1	0.000718662	1	2.07579e-11	MIC not significant	FALSE	TRUE	FALSE	FALSE	FALSE	TRUE	FALSE	FALSE
pcodonTCTAGC	3971	0.0764144	0.00256473	0.27	0.569	0.270982	0.583849	121	0.380812	0.194477	0.001	0.895	1.09472e-06	0.873235	4.13672e-07	MIC not significant	FALSE	TRUE	FALSE	FALSE	FALSE	TRUE	FALSE	FALSE
pcodonTCTAGA	3971	0.0830995	0.00724821	0.015	0.435	0.0116848	0.443387	215	0.282665	0.126226	0.001	0.994	0.000261994	0.982086	8.5633e-08	Monotone	TRUE	TRUE	FALSE	TRUE	TRUE	TRUE	FALSE	TRUE
pcodonTCTAGG	3971	0.0822947	0.00571445	0.072	0.525	0.0655159	0.540488	306	0.251904	0.126	0.00109901	0.99998	7.57878e-05	0.999628	1.62321e-10	MIC not significant	FALSE	TRUE	FALSE	FALSE	FALSE	TRUE	FALSE	FALSE
pcodonTCTGTC	3971	0.0822561	0.00557091	0.016	0.288	0.01231	0.292661	201	0.330051	0.142115	0.000108911	0.87799	5.73353e-07	0.867745	3.46464e-08	non-significant monotone/non-monotone	TRUE	TRUE	FALSE	FALSE	TRUE	TRUE	FALSE	FALSE
pcodonTCTGTG	3971	0.0832939	0.00860218	0.049	0.77	0.0384823	0.78064	310	0.252711	0.113076	0.001	0.998	5.16593e-05	0.991657	1.24378e-09	Monotone	FALSE	TRUE	FALSE	FALSE	FALSE	TRUE	FALSE	FALSE
pcodonTCTGCT	3971	0.0901297	0.0193365	0.000451613	0.984355	0.000134446	0.979712	359	0.238976	0.0749987	0.004	0.842	0.000114996	0.841338	1.3501e-07	non-significant monotone/non-monotone	TRUE	TRUE	FALSE	FALSE	TRUE	TRUE	FALSE	FALSE
pcodonTCTGCC	3971	0.0800404	0.00749748	0.071	0.769	0.0615255	0.777376	202	0.372506	0.151923	0	0.307168	3.86664e-12	0.331386	9.82433e-09	MIC not significant	FALSE	TRUE	FALSE	FALSE	FALSE	TRUE	FALSE	FALSE
pcodonTCTGCA	3971	0.082362	0.00698514	0.006	0.397	0.00559551	0.395856	166	0.298548	0.171802	0.00447525	0.99998	0.000704395	0.999555	2.82836e-08	Monotone	TRUE	TRUE	FALSE	TRUE	TRUE	TRUE	FALSE	TRUE
pcodonTCTGCG	3971	0.088943	0.0119825	0.00122581	0.564581	0.000436683	0.575853	352	0.246003	0.0954295	0.000188119	0.949	3.66427e-06	0.933673	3.2076e-09	non-significant monotone/non-monotone	TRUE	TRUE	FALSE	FALSE	TRUE	TRUE	FALSE	FALSE
pcodonTCTGAC	3971	0.075273	0.00130497	0.373	0.535	0.395616	0.563052	92	0.359158	0.158348	0.01	0.875	0.00307593	0.86047	8.56046e-05	MIC not significant	FALSE	TRUE	FALSE	FALSE	FALSE	TRUE	FALSE	FALSE
pcodonTCTGAA	3971	0.080422	0.00277456	0.057	0.18	0.0483848	0.193081	186	0.369996	0.173777	0	0.692772	3.0061e-11	0.708674	3.24648e-09	MIC not significant	FALSE	TRUE	FALSE	FALSE	FALSE	TRUE	FALSE	FALSE
pcodonTCTGAG	3971	0.0736909	0.00279295	0.651	0.892	0.64571	0.890817	145	0.257422	0.0590878	0.104	0.701	0.100042	0.719029	0.00321857	MIC not significant	FALSE	FALSE	FALSE	FALSE	FALSE	FALSE	FALSE	FALSE
pcodonTCTGGT	3971	0.0871145	0.0109401	0.01	0.725	0.00613316	0.73434	440	0.232112	0.0998937	0.000237624	0.999119	2.66595e-06	0.995881	1.15625e-11	Monotone	TRUE	TRUE	FALSE	TRUE	TRUE	TRUE	FALSE	TRUE
pcodonTCTGGC	3971	0.0803843	0.00340871	0.102	0.331	0.0986883	0.36326	231	0.220339	0.0681655	0.274	0.997	0.289504	0.994145	5.90664e-05	MIC not significant	FALSE	FALSE	FALSE	FALSE	FALSE	FALSE	FALSE	FALSE
pcodonTCTGGA	3971	0.0896537	0.00803944	0.001	0.126	0.000243896	0.125353	363	0.204102	0.0650631	0.0790198	0.998881	0.0704594	0.994744	8.4463e-07	MIC not significant	TRUE	FALSE	FALSE	FALSE	TRUE	FALSE	FALSE	FALSE
pcodonTCTGGG	3971	0.0879506	0.0104322	0.004	0.61	0.00355546	0.622075	455	0.211431	0.0878634	0.00205941	0.999931	0.000259703	0.99882	1.1115e-10	Monotone	TRUE	TRUE	FALSE	TRUE	TRUE	TRUE	FALSE	TRUE
pcodonTCCTTT	3971	0.0798042	0.00750332	0.494	0.986	0.504113	0.981517	535	0.280961	0.143654	0	0.953634	8.09492e-26	0.940193	1.01397e-19	MIC not significant	FALSE	TRUE	FALSE	FALSE	FALSE	TRUE	FALSE	FALSE
pcodonTCCTTC	3971	0.0809712	0.00156727	0.175	0.304	0.186418	0.308739	352	0.268655	0.142938	9.90099e-06	0.99996	1.39462e-09	0.99913	2.09905e-13	MIC not significant	FALSE	TRUE	FALSE	FALSE	FALSE	TRUE	FALSE	FALSE
pcodonTCCTTA	3971	0.0850881	0.00108562	0.03	0.058	0.032312	0.0543312	469	0.28307	0.211317	0	1	6.23936e-19	1	6.72809e-26	Monotone	FALSE	TRUE	FALSE	FALSE	FALSE	TRUE	FALSE	FALSE
pcodonTCCTTG	3971	0.090933	0.0143645	0.00083871	0.757806	0.000333757	0.763827	486	0.215231	0.0717787	0.001	0.912	5.23774e-05	0.906989	1.95927e-09	non-significant monotone/non-monotone	TRUE	TRUE	FALSE	FALSE	TRUE	TRUE	FALSE	FALSE
pcodonTCCTCT	3971	0.0835883	0.00379493	0.03	0.173	0.0227006	0.176318	297	0.250845	0.11639	0.00259406	0.99996	0.000413207	0.998982	1.5727e-09	Monotone	FALSE	TRUE	FALSE	FALSE	FALSE	TRUE	FALSE	FALSE
pcodonTCCTCC	3971	0.0749079	0.00022329	0.657	0.658	0.675431	0.676211	249	0.254053	0.130804	0.00587129	0.99999	0.0013591	0.999791	4.13969e-09	MIC not significant	FALSE	TRUE	FALSE	FALSE	FALSE	TRUE	FALSE	FALSE
pcodonTCCTCA	3971	0.0742768	0.00249937	0.577	0.848	0.590053	0.84543	162	0.266648	0.109153	0.052	0.993	0.0406879	0.984896	1.75702e-05	MIC not significant	FALSE	FALSE	FALSE	FALSE	FALSE	FALSE	FALSE	FALSE
pcodonTCCTCG	3971	0.0794848	0.000263718	0.284	0.285	0.286771	0.286922	324	0.283095	0.115362	0	0.856881	7.46332e-09	0.85086	3.43705e-10	MIC not significant	FALSE	TRUE	FALSE	FALSE	FALSE	TRUE	FALSE	FALSE
pcodonTCCTAT	3971	0.0802066	0.000165991	0.101	0.093	0.0918446	0.0878032	229	0.303525	0.202734	0.000257426	1	3.8702e-06	1	7.84817e-13	MIC not significant	FALSE	TRUE	FALSE	FALSE	FALSE	TRUE	FALSE	FALSE
pcodonTCCTAC	3971	0.0785151	0.00926514	0.103	0.974	0.094899	0.960891	135	0.311938	0.104472	0.007	0.695	0.00324257	0.708935	0.000131447	MIC not significant	FALSE	TRUE	FALSE	FALSE	FALSE	TRUE	FALSE	FALSE
pcodonTCCTAA	3971	0.0711459	0.000230622	0.92	0.925	0.912489	0.911765	100	0.483338	0.281335	9.90099e-06	0.749683	5.22892e-13	0.758156	1.38021e-08	MIC not significant	FALSE	TRUE	FALSE	FALSE	FALSE	TRUE	FALSE	FALSE
pcodonTCCTAG	3971	0.0787671	0.00158348	0.098	0.196	0.0980798	0.196798	164	0.281686	0.176652	0.0167723	1	0.00707693	0.999988	2.10679e-08	MIC not significant	FALSE	TRUE	FALSE	FALSE	FALSE	TRUE	FALSE	FALSE
pcodonTCCTGT	3971	0.0877772	0.0129527	0.002	0.674	0.000329698	0.672522	265	0.258877	0.0739803	0.004	0.671	0.000524503	0.679835	7.06345e-06	non-significant monotone/non-monotone	TRUE	TRUE	FALSE	FALSE	TRUE	TRUE	FALSE	FALSE
pcodonTCCTGC	3971	0.0764659	0.00010648	0.515	0.498	0.522598	0.50809	265	0.26065	0.0993643	0.006	0.968	0.000869877	0.954621	1.59361e-07	MIC not significant	FALSE	TRUE	FALSE	FALSE	FALSE	TRUE	FALSE	FALSE
pcodonTCCTGA	3971	0.0767443	0.000431575	0.392	0.42	0.384177	0.40454	229	0.288818	0.132853	0.00108911	0.996891	6.68728e-05	0.988736	1.32939e-08	MIC not significant	FALSE	TRUE	FALSE	FALSE	FALSE	TRUE	FALSE	FALSE
pcodonTCCTGG	3971	0.0819284	2.90095e-05	0.213	0.206	0.214752	0.195387	464	0.239397	0.111123	0	0.998337	1.29357e-09	0.993713	1.66636e-13	MIC not significant	FALSE	TRUE	FALSE	FALSE	FALSE	TRUE	FALSE	FALSE
pcodonTCCCTT	3971	0.0776865	0.00131101	0.285	0.424	0.312212	0.434082	234	0.285086	0.102459	0.001	0.813	3.95489e-05	0.798643	5.65974e-07	MIC not significant	FALSE	TRUE	FALSE	FALSE	FALSE	TRUE	FALSE	FALSE
pcodonTCCCTC	3971	0.0737845	0.000194367	0.67	0.666	0.688611	0.684012	73	0.344538	0.102594	0.053	0.539	0.0346448	0.578124	0.00573389	MIC not significant	FALSE	FALSE	FALSE	FALSE	FALSE	TRUE	FALSE	FALSE
pcodonTCCCTA	3971	0.0759034	0.00171693	0.303	0.499	0.313143	0.520582	107	0.274101	0.0341982	0.234	0.518	0.2783	0.547752	0.0565309	MIC not significant	FALSE	FALSE	FALSE	FALSE	FALSE	FALSE	FALSE	FALSE
pcodonTCCCTG	3971	0.0790556	0.0023013	0.064	0.182	0.0525085	0.190651	107	0.336626	0.0914961	0.022	0.446	0.00924422	0.479799	0.00154186	MIC not significant	FALSE	TRUE	FALSE	FALSE	FALSE	TRUE	FALSE	FALSE
pcodonTCCCCT	3971	0.0842991	8.4392e-06	0.001	0.001	0.00176386	0.00136513	215	0.311408	0.141061	0.000148515	0.942317	5.6664e-07	0.925295	1.31213e-08	non-significant monotone/non-monotone	TRUE	TRUE	FALSE	FALSE	TRUE	TRUE	FALSE	FALSE
pcodonTCCCCC	3971	0.0745706	0.000278236	0.564	0.562	0.580842	0.586571	72	0.342362	0.146915	0.057	0.929	0.042328	0.906107	0.000889465	MIC not significant	FALSE	FALSE	FALSE	FALSE	FALSE	FALSE	FALSE	FALSE
pcodonTCCCCA	3971	0.0813364	0.00283272	0.005	0.059	0.00148662	0.044528	56	0.321386	0.0139855	0.16	0.128	0.161284	0.137599	0.385356	MIC not significant	TRUE	FALSE	FALSE	FALSE	TRUE	FALSE	FALSE	FALSE
pcodonTCCCCG	3971	0.0732386	0.00135515	0.645	0.79	0.666927	0.795391	136	0.281498	0.0992681	0.058	0.94	0.0448663	0.91839	0.000186974	MIC not significant	FALSE	FALSE	FALSE	FALSE	FALSE	FALSE	FALSE	FALSE
pcodonTCCCAG	3971	0.0732374	0.000227034	0.868	0.871	0.863957	0.861323	58	0.498832	0.295915	0.003	0.839	1.28974e-06	0.816558	1.01742e-05	MIC not significant	FALSE	TRUE	FALSE	FALSE	FALSE	TRUE	FALSE	FALSE
pcodonTCCCGT	3971	0.0755915	0.00268261	0.351	0.711	0.365779	0.708897	108	0.311295	0.113531	0.053	0.927	0.0373838	0.901244	0.000362845	MIC not significant	FALSE	FALSE	FALSE	FALSE	FALSE	FALSE	FALSE	FALSE
pcodonTCCCGC	3971	0.0749113	0.00122129	0.581	0.854	0.618917	0.850029	40	0.25452	0.00904819	0.635	0.532	0.686468	0.59268	0.558052	MIC not significant	FALSE	FALSE	FALSE	FALSE	FALSE	FALSE	FALSE	FALSE
pcodonTCCCGA	3971	0.0781782	0.00268458	0.084	0.319	0.0793222	0.338628	83	0.365273	0.167067	0.027	0.955	0.0131737	0.934739	0.0001249	MIC not significant	FALSE	TRUE	FALSE	FALSE	FALSE	TRUE	FALSE	FALSE
pcodonTCCCGG	3971	0.0735941	0.00357123	0.629	0.932	0.638566	0.938483	120	0.292512	0.0575658	0.026	0.275	0.0165544	0.305452	0.00830411	MIC not significant	FALSE	TRUE	FALSE	FALSE	FALSE	TRUE	FALSE	FALSE
pcodonTCCATT	3971	0.0809508	0.00118958	0.146	0.215	0.144979	0.220148	328	0.292626	0.221824	0	1	1.04999e-10	1	1.63348e-19	MIC not significant	FALSE	TRUE	FALSE	FALSE	FALSE	TRUE	FALSE	FALSE
pcodonTCCATC	3971	0.0696541	0.000167854	0.967	0.963	0.959814	0.958115	161	0.320176	0.0885946	0.00147525	0.252604	9.12274e-05	0.273738	0.000125774	MIC not significant	FALSE	TRUE	FALSE	FALSE	FALSE	TRUE	FALSE	FALSE
pcodonTCCATA	3971	0.0777336	0.00129696	0.181	0.263	0.183814	0.287265	166	0.352655	0.287874	6.93069e-05	1	4.05791e-08	1	9.28208e-14	MIC not significant	FALSE	TRUE	FALSE	FALSE	FALSE	TRUE	FALSE	FALSE
pcodonTCCATG	3971	0.0770888	0.00180395	0.584	0.757	0.597241	0.763126	353	0.242774	0.121524	0.000366337	1	7.86458e-06	0.999634	1.59487e-11	MIC not significant	FALSE	TRUE	FALSE	FALSE	FALSE	TRUE	FALSE	FALSE
pcodonTCCACT	3971	0.0786971	0.0038092	0.133	0.511	0.136117	0.506693	188	0.296484	0.0495784	0.003	0.079	0.000328813	0.0580132	0.00213145	MIC not significant	FALSE	TRUE	FALSE	FALSE	FALSE	TRUE	FALSE	FALSE
pcodonTCCACC	3971	0.0799981	0.000312921	0.042	0.046	0.0417194	0.0434102	151	0.361001	0.170843	0.002	0.913	2.36383e-06	0.895248	1.32968e-07	non-significant monotone/non-monotone	FALSE	TRUE	FALSE	FALSE	FALSE	TRUE	FALSE	FALSE
pcodonTCCACA	3971	0.0752208	2.37561e-06	0.551	0.495	0.581806	0.522528	48	0.344142	0.124852	0.254	0.913	0.261285	0.889953	0.0141815	MIC not significant	FALSE	FALSE	FALSE	FALSE	FALSE	FALSE	FALSE	FALSE
pcodonTCCACG	3971	0.0807491	4.24735e-05	0.094	0.086	0.0830311	0.0733523	238	0.262381	0.09032	0.009	0.901	0.00216459	0.896958	2.34008e-06	MIC not significant	FALSE	TRUE	FALSE	FALSE	FALSE	TRUE	FALSE	FALSE
pcodonTCCAAT	3971	0.0779196	0.0031554	0.096	0.375	0.0915054	0.404541	108	0.327782	0.107709	0.017	0.724	0.00841818	0.744393	0.000525248	MIC not significant	FALSE	TRUE	FALSE	FALSE	FALSE	TRUE	FALSE	FALSE
pcodonTCCAAC	3971	0.0735854	4.93079e-05	0.716	0.684	0.728612	0.697328	78	0.34547	0.154107	0.017	0.881	0.00690747	0.860429	0.00037813	MIC not significant	FALSE	TRUE	FALSE	FALSE	FALSE	TRUE	FALSE	FALSE
pcodonTCCAAA	3971	0.072453	0.000254431	0.929	0.943	0.915895	0.919358	59	0.338687	0.156383	0.075	0.932	0.0555792	0.900145	0.00193544	MIC not significant	FALSE	FALSE	FALSE	FALSE	FALSE	FALSE	FALSE	FALSE
pcodonTCCAAG	3971	0.0830408	0.00938694	0.031	0.763	0.0230644	0.766205	252	0.276317	0.159976	0.000465347	1	1.11979e-05	0.999939	4.24931e-11	Monotone	FALSE	TRUE	FALSE	FALSE	FALSE	TRUE	FALSE	FALSE
pcodonTCCAGT	3971	0.080982	0.004488	0.026	0.24	0.0184726	0.256065	158	0.290532	0.0325932	0.014	0.074	0.00613033	0.0662513	0.0232097	non-significant monotone/non-monotone	FALSE	TRUE	FALSE	FALSE	TRUE	TRUE	FALSE	FALSE
pcodonTCCAGC	3971	0.0763891	0.000892093	0.282	0.349	0.293887	0.370905	159	0.369784	0.160878	3.9604e-05	0.611168	1.85629e-08	0.638347	1.61086e-07	MIC not significant	FALSE	TRUE	FALSE	FALSE	FALSE	TRUE	FALSE	FALSE
pcodonTCCAGA	3971	0.0740132	0.00032411	0.585	0.592	0.586999	0.597026	137	0.223204	0.0601641	0.546	0.995	0.586631	0.98137	0.00386551	MIC not significant	FALSE	FALSE	FALSE	FALSE	FALSE	FALSE	FALSE	FALSE
pcodonTCCAGG	3971	0.0744528	3.77289e-05	0.753	0.728	0.755039	0.732147	273	0.347021	0.156355	0	0.457436	5.60118e-17	0.488253	1.18695e-11	MIC not significant	FALSE	TRUE	FALSE	FALSE	FALSE	TRUE	FALSE	FALSE
pcodonTCCGTC	3971	0.073555	3.40332e-05	0.638	0.605	0.653027	0.627222	139	0.32173	0.180638	0.00369307	0.999594	0.000447882	0.99723	1.83772e-07	MIC not significant	FALSE	TRUE	FALSE	FALSE	FALSE	TRUE	FALSE	FALSE
pcodonTCCGTG	3971	0.0849807	0.000567843	0.00103226	0.00151613	0.000558603	0.000766783	168	0.342449	0.142535	9.90099e-05	0.617782	1.76974e-07	0.642512	4.53792e-07	non-significant monotone/non-monotone	TRUE	TRUE	FALSE	FALSE	TRUE	TRUE	FALSE	FALSE
pcodonTCCGCT	3971	0.0826108	0.010817	0.016	0.871	0.0135336	0.872457	222	0.286816	0.147408	0.000633663	0.999594	2.07821e-05	0.996928	3.28752e-09	Monotone	TRUE	TRUE	FALSE	TRUE	TRUE	TRUE	FALSE	TRUE
pcodonTCCGCC	3971	0.072196	0.00175919	0.804	0.914	0.806312	0.914857	165	0.305706	0.155021	0.005	0.998	0.000327505	0.991623	1.6772e-07	MIC not significant	FALSE	TRUE	FALSE	FALSE	FALSE	TRUE	FALSE	FALSE
pcodonTCCGCA	3971	0.0754643	0.00153573	0.357	0.568	0.375746	0.581958	89	0.226245	0.051244	0.796	0.989	0.797878	0.967986	0.0329109	MIC not significant	FALSE	FALSE	FALSE	FALSE	FALSE	FALSE	FALSE	FALSE
pcodonTCCGCG	3971	0.075916	0.000517342	0.615	0.643	0.629359	0.655194	279	0.306269	0.168209	0	0.999426	6.91798e-11	0.996468	9.59273e-13	MIC not significant	FALSE	TRUE	FALSE	FALSE	FALSE	TRUE	FALSE	FALSE
pcodonTCCGAA	3971	0.0724535	0.00037355	0.766	0.786	0.778189	0.792444	106	0.317644	0.113653	0.042	0.891	0.0234154	0.88323	0.000409642	MIC not significant	FALSE	FALSE	FALSE	FALSE	FALSE	TRUE	FALSE	FALSE
pcodonTCCGAG	3971	0.0727976	6.42617e-05	0.831	0.805	0.814493	0.795077	79	0.269867	0.0693841	0.228	0.796	0.267607	0.789519	0.0190018	MIC not significant	FALSE	FALSE	FALSE	FALSE	FALSE	FALSE	FALSE	FALSE
pcodonTCCGGT	3971	0.0787247	0.00129344	0.267	0.367	0.258172	0.369422	269	0.227193	0.0829321	0.0593465	0.999119	0.0488503	0.995042	1.56025e-06	MIC not significant	FALSE	FALSE	FALSE	FALSE	FALSE	FALSE	FALSE	FALSE
pcodonTCCGGC	3971	0.0836424	0.000672197	0.004	0.006	0.00225346	0.00327282	174	0.272756	0.113008	0.047	0.998	0.0358781	0.9919	5.75834e-06	Monotone	TRUE	FALSE	FALSE	FALSE	TRUE	TRUE	FALSE	TRUE
pcodonTCCGGA	3971	0.0787191	0.000439191	0.231	0.25	0.228854	0.245487	251	0.282242	0.148558	0.000366337	0.999822	2.78209e-06	0.998268	2.58421e-10	MIC not significant	FALSE	TRUE	FALSE	FALSE	FALSE	TRUE	FALSE	FALSE
pcodonTCCGGG	3971	0.0836394	0.00418701	0.015	0.146	0.0146209	0.156497	256	0.268343	0.0936631	0.002	0.74	4.11818e-05	0.75394	5.94283e-07	non-significant monotone/non-monotone	TRUE	TRUE	FALSE	FALSE	TRUE	TRUE	FALSE	FALSE
pcodonTCATTT	3971	0.0853694	0.0162327	0.023	0.995	0.0153884	0.993527	356	0.254744	0.144153	7.92079e-05	1	1.03842e-07	0.999973	1.18816e-13	Monotone	FALSE	TRUE	FALSE	FALSE	TRUE	TRUE	FALSE	TRUE
pcodonTCATTC	3971	0.0790292	0.00595183	0.144	0.75	0.132871	0.75799	204	0.272244	0.136137	0.013099	0.99998	0.00508687	0.99937	5.62451e-08	MIC not significant	FALSE	TRUE	FALSE	FALSE	FALSE	TRUE	FALSE	FALSE
pcodonTCATTA	3971	0.0801247	0.00795393	0.107	0.863	0.104773	0.858601	234	0.301308	0.165576	0.000227723	0.99997	2.27702e-06	0.999333	9.57634e-11	MIC not significant	FALSE	TRUE	FALSE	FALSE	FALSE	TRUE	FALSE	FALSE
pcodonTCATTG	3971	0.0944123	0.0184682	0	0.576327	6.80876e-08	0.586713	289	0.284592	0.113278	2.9703e-05	0.718921	7.38993e-09	0.731133	4.38493e-09	non-significant monotone/non-monotone	TRUE	TRUE	FALSE	FALSE	TRUE	TRUE	FALSE	FALSE
pcodonTCATCT	3971	0.0898283	0.0154498	1.9802e-05	0.527653	7.70859e-07	0.541544	170	0.306749	0.158822	0.003	0.998	3.78917e-05	0.990769	7.34726e-08	Monotone	TRUE	TRUE	FALSE	TRUE	TRUE	TRUE	FALSE	TRUE
pcodonTCATCC	3971	0.0799953	0.00410441	0.026	0.285	0.0198994	0.302029	80	0.407461	0.128976	0.000970297	0.116733	1.80695e-05	0.115406	0.00106981	non-significant monotone/non-monotone	FALSE	TRUE	FALSE	FALSE	TRUE	TRUE	FALSE	FALSE
pcodonTCATCA	3971	0.0748267	0.00211812	0.577	0.884	0.594209	0.878231	60	0.287176	0.0933729	0.222	0.842	0.264639	0.83322	0.0175853	MIC not significant	FALSE	FALSE	FALSE	FALSE	FALSE	FALSE	FALSE	FALSE
pcodonTCATCG	3971	0.0830316	0.00828179	0.005	0.434	0.00184926	0.459633	122	0.272282	0.0706281	0.083	0.723	0.0794341	0.732047	0.00309054	MIC not significant	TRUE	FALSE	FALSE	FALSE	TRUE	FALSE	FALSE	FALSE
pcodonTCATAT	3971	0.0807057	0.00506357	0.036	0.334	0.0253352	0.359285	162	0.283874	0.136335	0.016	0.999	0.00813505	0.994137	1.3303e-06	Monotone	FALSE	TRUE	FALSE	FALSE	FALSE	TRUE	FALSE	FALSE
pcodonTCATAC	3971	0.0797074	0.0043905	0.03	0.399	0.0190206	0.428923	64	0.280415	0.133506	0.556	0.998	0.606873	0.996866	0.00316002	MIC not significant	FALSE	FALSE	FALSE	FALSE	TRUE	FALSE	FALSE	FALSE
pcodonTCATAA	3971	0.0776218	0.00498422	0.16	0.782	0.149507	0.799745	80	0.342525	0.215361	0.0180891	0.999079	0.00657249	0.996125	1.4524e-05	MIC not significant	FALSE	TRUE	FALSE	FALSE	FALSE	TRUE	FALSE	FALSE
pcodonTCATAG	3971	0.0776113	0.00143158	0.128	0.219	0.129783	0.243866	109	0.42306	0.281895	8.91089e-05	0.999812	1.32001e-07	0.998338	2.86821e-09	MIC not significant	FALSE	TRUE	FALSE	FALSE	FALSE	TRUE	FALSE	FALSE
pcodonTCATGT	3971	0.0886969	0.0138958	6.45161e-05	0.442968	1.94103e-06	0.459119	156	0.26866	0.076468	0.064	0.869	0.0594951	0.860706	0.000475026	MIC not significant	TRUE	FALSE	FALSE	FALSE	TRUE	FALSE	FALSE	FALSE
pcodonTCATGC	3971	0.072619	0.000743783	0.797	0.854	0.797889	0.85007	86	0.306608	0.149624	0.146	0.997	0.14224	0.993264	0.000234189	MIC not significant	FALSE	FALSE	FALSE	FALSE	FALSE	FALSE	FALSE	FALSE
pcodonTCATGA	3971	0.0831052	0.00982911	0.004	0.629	0.00178926	0.642127	141	0.316356	0.161109	0.001	0.995	0.000595308	0.984729	8.10668e-07	Monotone	TRUE	TRUE	FALSE	TRUE	TRUE	TRUE	FALSE	TRUE
pcodonTCATGG	3971	0.0817088	0.00626022	0.029	0.376	0.0165541	0.402513	174	0.281754	0.101079	0.024	0.965	0.0132091	0.939622	1.91148e-05	Monotone	FALSE	TRUE	FALSE	FALSE	TRUE	TRUE	FALSE	FALSE
pcodonTCACTT	3971	0.0815526	0.00594741	0.052	0.5	0.040734	0.512817	227	0.277632	0.196566	0.000940594	1	4.4668e-05	1	2.38782e-12	MIC not significant	FALSE	TRUE	FALSE	FALSE	FALSE	TRUE	FALSE	FALSE
pcodonTCACTC	3971	0.075643	0.00313992	0.381	0.84	0.408187	0.835841	76	0.199995	0.0152874	0.916	0.925	0.898484	0.912369	0.287277	MIC not significant	FALSE	FALSE	FALSE	FALSE	FALSE	FALSE	FALSE	FALSE
pcodonTCACTA	3971	0.0745269	0.00215735	0.463	0.746	0.493896	0.744884	131	0.269862	0.144124	0.149337	0.99999	0.152438	0.999805	7.74579e-06	MIC not significant	FALSE	FALSE	FALSE	FALSE	FALSE	FALSE	FALSE	FALSE
pcodonTCACTG	3971	0.0796564	0.00531184	0.039	0.477	0.0375052	0.494955	131	0.428548	0.217236	0	0.724822	1.31385e-10	0.73808	2.01969e-08	non-significant monotone/non-monotone	FALSE	TRUE	FALSE	FALSE	FALSE	TRUE	FALSE	FALSE
pcodonTCACCT	3971	0.0820254	0.00755932	0.017	0.488	0.00843773	0.501938	156	0.264651	0.141327	0.0869109	0.99998	0.0779961	0.999857	1.32301e-06	MIC not significant	TRUE	FALSE	FALSE	FALSE	TRUE	FALSE	FALSE	FALSE
pcodonTCACCC	3971	0.0804545	0.00621311	0.014	0.561	0.0101939	0.58151	77	0.296517	0.103661	0.135	0.882	0.131065	0.85994	0.00429724	MIC not significant	TRUE	FALSE	FALSE	FALSE	TRUE	FALSE	FALSE	FALSE
pcodonTCACCA	3971	0.0795392	0.00577746	0.034	0.644	0.0244531	0.646968	79	0.358163	0.102384	0.014	0.29	0.00361193	0.305009	0.00404465	non-significant monotone/non-monotone	FALSE	TRUE	FALSE	FALSE	FALSE	TRUE	FALSE	FALSE
pcodonTCACCG	3971	0.0819425	0.0133183	0.014	0.982	0.00905349	0.975063	160	0.269463	0.156597	0.0508317	1	0.0383282	0.999967	2.22707e-07	MIC not significant	TRUE	FALSE	FALSE	FALSE	TRUE	FALSE	FALSE	FALSE
pcodonTCACGT	3971	0.078009	0.00478468	0.121	0.637	0.126384	0.655684	152	0.351008	0.177066	0.000455446	0.986475	8.8125e-06	0.970876	6.74632e-08	MIC not significant	FALSE	TRUE	FALSE	FALSE	FALSE	TRUE	FALSE	FALSE
pcodonTCACGC	3971	0.0766068	0.00427709	0.269	0.981	0.289609	0.956335	48	0.307246	0.129674	0.442	0.984	0.493193	0.972464	0.0119345	MIC not significant	FALSE	FALSE	FALSE	FALSE	FALSE	FALSE	FALSE	FALSE
pcodonTCACGA	3971	0.0816633	0.00218624	0.011	0.035	0.00462943	0.0276779	111	0.320201	0.19903	0.0244356	0.99996	0.0121979	0.999721	9.23265e-07	Monotone	TRUE	TRUE	FALSE	TRUE	TRUE	TRUE	FALSE	TRUE
pcodonTCACGG	3971	0.0794566	0.00586544	0.042	0.588	0.034154	0.60542	111	0.333131	0.139332	0.013	0.914	0.00453941	0.899672	5.46049e-05	non-significant monotone/non-monotone	FALSE	TRUE	FALSE	FALSE	FALSE	TRUE	FALSE	FALSE
pcodonTCAATT	3971	0.0846425	0.0103694	0.013	0.79	0.0133619	0.795359	308	0.298832	0.149001	0	0.988574	1.63132e-11	0.976414	2.20575e-12	Monotone	TRUE	TRUE	FALSE	TRUE	TRUE	TRUE	FALSE	TRUE
pcodonTCAATC	3971	0.0763676	0.00480816	0.277	0.84	0.290386	0.84785	138	0.314479	0.0364165	0.01	0.033	0.00208538	0.0278022	0.0249605	MIC not significant	FALSE	TRUE	FALSE	FALSE	FALSE	TRUE	FALSE	FALSE
pcodonTCAATA	3971	0.0729892	0.00170437	0.721	0.869	0.720112	0.861605	143	0.357821	0.197528	0.000168317	0.990475	5.62974e-07	0.977042	2.68839e-08	MIC not significant	FALSE	TRUE	FALSE	FALSE	FALSE	TRUE	FALSE	FALSE
pcodonTCAATG	3971	0.0875185	0.0074414	0.00129032	0.141839	0.000619586	0.141557	279	0.281894	0.130412	0.001	0.986	3.9462e-07	0.970961	5.10205e-10	Monotone	TRUE	TRUE	FALSE	TRUE	TRUE	TRUE	FALSE	TRUE
pcodonTCAACT	3971	0.0813338	0.00652889	0.019	0.452	0.0152166	0.474961	146	0.357313	0.141928	5.94059e-05	0.418752	2.0005e-07	0.453325	2.77495e-06	non-significant monotone/non-monotone	TRUE	TRUE	FALSE	FALSE	TRUE	TRUE	FALSE	FALSE
pcodonTCAACC	3971	0.0794344	0.000745265	0.032	0.05	0.0254258	0.0392262	88	0.329257	0.193241	0.0526238	0.999822	0.0381892	0.998185	1.827e-05	MIC not significant	FALSE	FALSE	FALSE	FALSE	FALSE	FALSE	FALSE	FALSE
pcodonTCAACA	3971	0.074097	0.00156508	0.634	0.829	0.647301	0.832063	77	0.49515	0.198843	2.9703e-05	0.083901	1.28757e-09	0.0749033	4.81664e-05	MIC not significant	FALSE	TRUE	FALSE	FALSE	FALSE	TRUE	FALSE	FALSE
pcodonTCAACG	3971	0.0776339	0.00132542	0.145	0.231	0.140649	0.240203	139	0.265168	0.0841362	0.089	0.936	0.0792367	0.923436	0.000532843	MIC not significant	FALSE	FALSE	FALSE	FALSE	FALSE	FALSE	FALSE	FALSE
pcodonTCAAAT	3971	0.0781747	0.00789732	0.109	0.936	0.113463	0.928914	120	0.338008	0.185716	0.00282178	0.996584	0.000240735	0.987968	8.94933e-07	MIC not significant	FALSE	TRUE	FALSE	FALSE	FALSE	TRUE	FALSE	FALSE
pcodonTCAAAC	3971	0.0747411	0.00151013	0.47	0.68	0.497311	0.688087	94	0.366672	0.146993	0.006	0.692	0.000837488	0.706726	0.000136592	MIC not significant	FALSE	TRUE	FALSE	FALSE	FALSE	TRUE	FALSE	FALSE
pcodonTCAAAA	3971	0.078586	0.00035722	0.067	0.07	0.0547917	0.0605652	68	0.344676	0.0690664	0.089	0.328	0.0708997	0.368399	0.0303739	MIC not significant	FALSE	FALSE	FALSE	FALSE	FALSE	FALSE	FALSE	FALSE
pcodonTCAAAG	3971	0.0750233	0.00139654	0.44	0.608	0.45263	0.610458	146	0.246218	0.0831997	0.157	0.988	0.155304	0.966616	0.000414515	MIC not significant	FALSE	FALSE	FALSE	FALSE	FALSE	FALSE	FALSE	FALSE
pcodonTCAAGT	3971	0.0822353	0.00819866	0.008	0.539	0.00459877	0.553872	145	0.27648	0.099097	0.027	0.912	0.0150416	0.899094	0.000115088	non-significant monotone/non-monotone	TRUE	TRUE	FALSE	FALSE	TRUE	TRUE	FALSE	FALSE
pcodonTCAAGC	3971	0.0778136	0.00476362	0.111	0.749	0.105692	0.759225	77	0.301464	0.072192	0.115	0.558	0.108019	0.58507	0.0181389	MIC not significant	FALSE	FALSE	FALSE	FALSE	FALSE	FALSE	FALSE	FALSE
pcodonTCAAGA	3971	0.0767051	0.00547792	0.222	0.856	0.229561	0.85399	124	0.46427	0.259592	9.90099e-06	0.884604	4.96293e-12	0.871517	1.51007e-09	MIC not significant	FALSE	TRUE	FALSE	FALSE	FALSE	TRUE	FALSE	FALSE
pcodonTCAAGG	3971	0.0782862	0.00291064	0.119	0.345	0.111047	0.369418	156	0.265449	0.134692	0.0915644	0.99999	0.0830502	0.999688	2.44684e-06	MIC not significant	FALSE	FALSE	FALSE	FALSE	FALSE	FALSE	FALSE	FALSE
pcodonTCAGTC	3971	0.0799634	0.00242215	0.028	0.113	0.0209946	0.110556	99	0.32141	0.170906	0.013	0.995	0.00489365	0.985046	2.10938e-05	Monotone	FALSE	TRUE	FALSE	FALSE	FALSE	TRUE	FALSE	FALSE
pcodonTCAGTG	3971	0.0775455	0.00465437	0.167	0.698	0.17182	0.704568	140	0.272815	0.0684679	0.055	0.679	0.0489967	0.69648	0.00179088	MIC not significant	FALSE	FALSE	FALSE	FALSE	FALSE	FALSE	FALSE	FALSE
pcodonTCAGCT	3971	0.0805291	0.0091625	0.033	0.836	0.0292455	0.838671	153	0.262308	0.0923764	0.145	0.984	0.143295	0.973397	0.00013378	MIC not significant	FALSE	FALSE	FALSE	FALSE	FALSE	FALSE	FALSE	FALSE
pcodonTCAGCC	3971	0.074787	0.00309845	0.438	0.809	0.451574	0.814013	122	0.396134	0.207451	6.93069e-05	0.849119	1.5996e-08	0.840164	1.35481e-07	MIC not significant	FALSE	TRUE	FALSE	FALSE	FALSE	TRUE	FALSE	FALSE
pcodonTCAGCA	3971	0.0847666	0.00972987	0.000225806	0.395323	3.2571e-05	0.418002	86	0.286938	0.0744403	0.28	0.87	0.299625	0.855624	0.0110352	MIC not significant	TRUE	FALSE	FALSE	FALSE	TRUE	FALSE	FALSE	FALSE
pcodonTCAGCG	3971	0.0801668	0.00885015	0.039	0.854	0.0393273	0.853409	151	0.236421	0.0557059	0.423	0.972	0.470547	0.951532	0.00352841	MIC not significant	FALSE	FALSE	FALSE	FALSE	FALSE	FALSE	FALSE	FALSE
pcodonTCAGAC	3971	0.0756952	0.00310052	0.406	0.986	0.440105	0.959775	43	0.343562	0.0145231	0.105	0.076	0.0957413	0.0670893	0.441433	MIC not significant	FALSE	FALSE	FALSE	FALSE	FALSE	FALSE	FALSE	FALSE
pcodonTCAGAA	3971	0.0763455	0.00145633	0.266	0.428	0.280048	0.467364	76	0.245697	0.101271	0.526	0.998	0.572851	0.987922	0.00508615	MIC not significant	FALSE	FALSE	FALSE	FALSE	FALSE	FALSE	FALSE	FALSE
pcodonTCAGAG	3971	0.0786706	0.000532992	0.04	0.052	0.030853	0.0452352	47	0.635178	0.331116	9.90099e-05	0.352337	1.84456e-08	0.395857	2.32423e-05	non-significant monotone/non-monotone	FALSE	TRUE	FALSE	FALSE	FALSE	TRUE	FALSE	FALSE
pcodonTCAGGT	3971	0.0807543	0.00954465	0.048	0.897	0.0461734	0.891318	196	0.280069	0.0696149	0.003	0.294	0.000466143	0.313724	0.000186486	non-significant monotone/non-monotone	FALSE	TRUE	FALSE	FALSE	FALSE	TRUE	FALSE	FALSE
pcodonTCAGGC	3971	0.0784439	0.00390869	0.093	0.454	0.0845766	0.463001	137	0.349996	0.194346	0.001	0.997	2.74968e-05	0.991616	6.98906e-08	MIC not significant	FALSE	TRUE	FALSE	FALSE	FALSE	TRUE	FALSE	FALSE
pcodonTCAGGA	3971	0.0812064	0.00370073	0.045	0.236	0.0370259	0.240167	203	0.370582	0.23125	0	0.999891	5.10308e-12	0.999135	3.82232e-13	Monotone	FALSE	TRUE	FALSE	FALSE	FALSE	TRUE	FALSE	FALSE
pcodonTCAGGG	3971	0.0812699	0.0050546	0.048	0.391	0.0402414	0.408596	214	0.293439	0.175362	0.000722772	1	3.27968e-05	0.999949	1.70266e-10	Monotone	FALSE	TRUE	FALSE	FALSE	FALSE	TRUE	FALSE	FALSE
pcodonTCGTTT	3971	0.0845473	0.00347561	0.09	0.321	0.08356	0.322778	499	0.193572	0.0729086	0.00873267	0.999901	0.00351353	0.998874	8.74327e-10	MIC not significant	FALSE	TRUE	FALSE	FALSE	FALSE	TRUE	FALSE	FALSE
pcodonTCGTTC	3971	0.0827274	0.00606617	0.051	0.517	0.0457101	0.535127	304	0.251915	0.0925901	0.00138614	0.942376	0.000107603	0.925965	6.21729e-08	MIC not significant	FALSE	TRUE	FALSE	FALSE	FALSE	TRUE	FALSE	FALSE
pcodonTCGTTA	3971	0.0821932	0.000495181	0.114	0.128	0.100725	0.113266	373	0.295497	0.184324	0	1	1.72412e-15	0.999989	3.67839e-18	MIC not significant	FALSE	TRUE	FALSE	FALSE	FALSE	TRUE	FALSE	FALSE
pcodonTCGTTG	3971	0.102327	0.0194765	0	0.156782	2.23714e-11	0.157409	521	0.228691	0.0909973	9.90099e-06	0.975366	1.10167e-08	0.962676	2.01525e-12	Monotone	TRUE	TRUE	FALSE	TRUE	TRUE	TRUE	FALSE	FALSE
pcodonTCGTCT	3971	0.0894402	0.00608999	0.00122581	0.0566452	0.000393906	0.0523344	378	0.239684	0.0995054	0.000257426	0.994337	7.02864e-06	0.984991	3.5297e-10	Monotone	TRUE	TRUE	FALSE	TRUE	TRUE	TRUE	FALSE	TRUE
pcodonTCGTCC	3971	0.081472	0.00326834	0.045	0.221	0.0446188	0.222282	239	0.321303	0.149675	0.001	0.926	4.40348e-09	0.902089	5.92343e-10	non-significant monotone/non-monotone	FALSE	TRUE	FALSE	FALSE	FALSE	TRUE	FALSE	FALSE
pcodonTCGTCA	3971	0.0791597	0.00679896	0.086	0.765	0.0816483	0.775031	165	0.31027	0.107129	0.002	0.6	0.000188241	0.627926	1.77744e-05	MIC not significant	FALSE	TRUE	FALSE	FALSE	FALSE	TRUE	FALSE	FALSE
pcodonTCGTCG	3971	0.080497	0.0010955	0.271	0.354	0.283817	0.375099	421	0.268869	0.174374	0	1	1.73606e-13	1	3.3977e-19	MIC not significant	FALSE	TRUE	FALSE	FALSE	FALSE	TRUE	FALSE	FALSE
pcodonTCGTAT	3971	0.0825608	0.00137679	0.037	0.066	0.0321551	0.0652197	261	0.315384	0.204594	9.90099e-06	1	1.55585e-09	0.999996	1.44353e-14	Monotone	FALSE	TRUE	FALSE	FALSE	FALSE	TRUE	FALSE	FALSE
pcodonTCGTAC	3971	0.0774205	0.00729293	0.165	0.932	0.179432	0.926053	135	0.360549	0.191484	0.002	0.986	6.7409e-06	0.972148	1.11363e-07	MIC not significant	FALSE	TRUE	FALSE	FALSE	FALSE	TRUE	FALSE	FALSE
pcodonTCGTAA	3971	0.0825903	0.00387938	0.004	0.074	0.0024978	0.060531	117	0.305542	0.156797	0.024	0.998	0.0114415	0.993834	9.90781e-06	Monotone	TRUE	TRUE	FALSE	TRUE	TRUE	TRUE	FALSE	TRUE
pcodonTCGTAG	3971	0.0803251	0.00540951	0.107	0.595	0.0961933	0.596393	223	0.306838	0.142259	7.92079e-05	0.951545	1.64622e-07	0.934488	5.99116e-09	MIC not significant	FALSE	TRUE	FALSE	FALSE	FALSE	TRUE	FALSE	FALSE
pcodonTCGTGT	3971	0.0884705	0.010124	0.000870968	0.311871	0.000292178	0.319267	295	0.347387	0.197268	0	0.994941	1.72112e-18	0.986519	1.08245e-15	Monotone	TRUE	TRUE	FALSE	TRUE	TRUE	TRUE	FALSE	TRUE
pcodonTCGTGC	3971	0.0830078	0.000576743	0.038	0.055	0.0383342	0.0463249	287	0.280875	0.183519	2.9703e-05	1	3.32394e-08	0.999999	3.07689e-14	Monotone	FALSE	TRUE	FALSE	FALSE	FALSE	TRUE	FALSE	FALSE
pcodonTCGTGA	3971	0.0790665	0.00118707	0.227	0.303	0.221917	0.318107	265	0.251464	0.0897141	0.01	0.972	0.00295908	0.963417	6.78762e-07	MIC not significant	FALSE	TRUE	FALSE	FALSE	FALSE	TRUE	FALSE	FALSE
pcodonTCGTGG	3971	0.0855112	0.00173495	0.028	0.08	0.0320872	0.0776422	464	0.257011	0.0922641	0	0.347327	1.49825e-13	0.373804	2.32676e-11	non-significant monotone/non-monotone	FALSE	TRUE	FALSE	FALSE	FALSE	TRUE	FALSE	FALSE
pcodonTCGCTT	3971	0.0804329	0.00127959	0.299	0.418	0.303894	0.416204	447	0.284119	0.177781	0	1	1.94388e-18	0.999995	1.07862e-20	MIC not significant	FALSE	TRUE	FALSE	FALSE	FALSE	TRUE	FALSE	FALSE
pcodonTCGCTC	3971	0.0748413	0.00040554	0.442	0.467	0.471576	0.494044	120	0.296442	0.110832	0.019	0.9	0.0117774	0.884579	0.000202984	MIC not significant	FALSE	TRUE	FALSE	FALSE	FALSE	TRUE	FALSE	FALSE
pcodonTCGCTA	3971	0.0785481	0.00202084	0.155	0.312	0.147728	0.312309	191	0.257733	0.149228	0.0331188	1	0.0209513	0.999986	3.39975e-08	MIC not significant	FALSE	TRUE	FALSE	FALSE	FALSE	TRUE	FALSE	FALSE
pcodonTCGCTG	3971	0.0810121	0.0064426	0.05	0.582	0.0450803	0.603524	219	0.330152	0.128678	0	0.403307	9.05054e-10	0.434748	4.73488e-08	MIC not significant	FALSE	TRUE	FALSE	FALSE	FALSE	TRUE	FALSE	FALSE
pcodonTCGCCT	3971	0.0807686	0.00113427	0.249	0.319	0.250071	0.33943	407	0.254201	0.161476	9.90099e-06	1	6.45578e-09	1	3.16488e-17	MIC not significant	FALSE	TRUE	FALSE	FALSE	FALSE	TRUE	FALSE	FALSE
pcodonTCGCCC	3971	0.0806442	0.00862772	0.015	0.78	0.0165323	0.786858	143	0.255592	0.0784134	0.13	0.935	0.127108	0.919197	0.000706004	MIC not significant	TRUE	FALSE	FALSE	FALSE	TRUE	FALSE	FALSE	FALSE
pcodonTCGCCA	3971	0.0784948	0.00498097	0.108	0.622	0.0933844	0.63272	124	0.272146	0.0266956	0.225	0.395	0.228206	0.439772	0.0698028	MIC not significant	FALSE	FALSE	FALSE	FALSE	FALSE	FALSE	FALSE	FALSE
pcodonTCGCCG	3971	0.08211	0.00936369	0.056	0.866	0.0522149	0.859001	271	0.237787	0.028503	0.016	0.151	0.00954065	0.148628	0.00532895	MIC not significant	FALSE	TRUE	FALSE	FALSE	FALSE	TRUE	FALSE	FALSE
pcodonTCGCAT	3971	0.0764307	0.00435333	0.227	0.998	0.245228	0.985029	42	0.319505	0.0727279	0.187	0.484	0.222585	0.526926	0.0841405	MIC not significant	FALSE	FALSE	FALSE	FALSE	FALSE	FALSE	FALSE	FALSE
pcodonTCGCAG	3971	0.0737927	1.71749e-08	0.616	0.574	0.638918	0.602458	93	0.236341	0.0686802	0.601	0.99	0.62865	0.970187	0.0111603	MIC not significant	FALSE	FALSE	FALSE	FALSE	FALSE	FALSE	FALSE	FALSE
pcodonTCGCGT	3971	0.0791038	0.00348364	0.163	0.479	0.163333	0.493842	226	0.231783	0.110187	0.0586436	1	0.0468241	0.999757	3.25395e-07	MIC not significant	FALSE	FALSE	FALSE	FALSE	FALSE	FALSE	FALSE	FALSE
pcodonTCGCGC	3971	0.0743353	0.0037809	0.552	0.964	0.573571	0.957944	78	0.348416	0.104153	0.025	0.394	0.0108311	0.4425	0.00411249	MIC not significant	FALSE	TRUE	FALSE	FALSE	FALSE	TRUE	FALSE	FALSE
pcodonTCGCGA	3971	0.0793864	0.00175483	0.084	0.161	0.0743095	0.16562	172	0.330879	0.164215	0.000108911	0.963089	5.732e-07	0.943737	3.50265e-08	MIC not significant	FALSE	TRUE	FALSE	FALSE	FALSE	TRUE	FALSE	FALSE
pcodonTCGCGG	3971	0.0803283	0.00200963	0.064	0.165	0.0576657	0.157806	204	0.289923	0.112369	0.005	0.947	0.000591262	0.928858	9.53724e-07	MIC not significant	FALSE	TRUE	FALSE	FALSE	FALSE	TRUE	FALSE	FALSE
pcodonTCGATT	3971	0.0831522	0.00184878	0.269	0.437	0.284561	0.446991	705	0.240768	0.141968	0	1	1.75275e-22	0.999997	3.35029e-25	MIC not significant	FALSE	TRUE	FALSE	FALSE	FALSE	TRUE	FALSE	FALSE
pcodonTCGATC	3971	0.0775333	0.000408389	0.4	0.417	0.417845	0.434974	269	0.222486	0.0751116	0.086	0.999	0.081526	0.990778	5.07386e-06	MIC not significant	FALSE	FALSE	FALSE	FALSE	FALSE	FALSE	FALSE	FALSE
pcodonTCGATA	3971	0.0809034	0.00483473	0.124	0.583	0.126685	0.585899	299	0.276311	0.154799	9.90099e-05	0.99999	5.40084e-07	0.999918	1.64545e-12	MIC not significant	FALSE	TRUE	FALSE	FALSE	FALSE	TRUE	FALSE	FALSE
pcodonTCGATG	3971	0.0816236	0.00656404	0.373	0.937	0.375128	0.93217	621	0.240797	0.107552	0	0.935673	1.39759e-17	0.922038	4.89736e-17	MIC not significant	FALSE	TRUE	FALSE	FALSE	FALSE	TRUE	FALSE	FALSE
pcodonTCGACT	3971	0.0836327	0.00716069	0.078	0.701	0.0688941	0.714328	424	0.240463	0.103131	9.90099e-06	0.990663	4.67354e-08	0.979789	1.25798e-11	MIC not significant	FALSE	TRUE	FALSE	FALSE	FALSE	TRUE	FALSE	FALSE
pcodonTCGACC	3971	0.0776097	4.03833e-05	0.417	0.389	0.421613	0.39709	299	0.287507	0.128358	1.9802e-05	0.964347	1.42254e-08	0.947855	1.74513e-10	MIC not significant	FALSE	TRUE	FALSE	FALSE	FALSE	TRUE	FALSE	FALSE
pcodonTCGACA	3971	0.0761759	0.00202504	0.321	0.551	0.33458	0.553759	168	0.333498	0.146601	0.000217822	0.803812	9.75226e-07	0.804164	3.01904e-07	MIC not significant	FALSE	TRUE	FALSE	FALSE	FALSE	TRUE	FALSE	FALSE
pcodonTCGACG	3971	0.0798229	0.000480997	0.426	0.453	0.446032	0.471736	488	0.274337	0.161825	0	1	5.05238e-19	0.999935	2.08782e-20	MIC not significant	FALSE	TRUE	FALSE	FALSE	FALSE	TRUE	FALSE	FALSE
pcodonTCGAAT	3971	0.0797363	0.00585945	0.099	0.675	0.100489	0.685873	215	0.337781	0.145861	9.90099e-06	0.648317	4.61191e-10	0.668082	7.11145e-09	MIC not significant	FALSE	TRUE	FALSE	FALSE	FALSE	TRUE	FALSE	FALSE
pcodonTCGAAC	3971	0.0776336	0.00285353	0.22	0.517	0.219333	0.515119	192	0.230434	0.0826438	0.179	0.998	0.190791	0.991904	5.27528e-05	MIC not significant	FALSE	FALSE	FALSE	FALSE	FALSE	FALSE	FALSE	FALSE
pcodonTCGAAA	3971	0.0824418	0.00305105	0.007	0.058	0.00467905	0.0483201	151	0.350855	0.134377	0.000623762	0.623653	1.28966e-05	0.650293	3.66919e-06	non-significant monotone/non-monotone	TRUE	TRUE	FALSE	FALSE	TRUE	TRUE	FALSE	FALSE
pcodonTCGAAG	3971	0.0840329	0.00252679	0.112	0.281	0.115265	0.292348	561	0.260895	0.194679	0	1	1.22131e-19	1	3.96797e-28	MIC not significant	FALSE	TRUE	FALSE	FALSE	FALSE	TRUE	FALSE	FALSE
pcodonTCGAGT	3971	0.0786295	0.00285312	0.253	0.534	0.260792	0.560642	268	0.295562	0.153745	1.9802e-05	0.999515	7.80969e-08	0.996689	2.78534e-11	MIC not significant	FALSE	TRUE	FALSE	FALSE	FALSE	TRUE	FALSE	FALSE
pcodonTCGAGC	3971	0.0713518	3.88084e-05	0.928	0.92	0.92466	0.916476	239	0.344182	0.164498	0	0.830485	1.40376e-12	0.827866	7.04694e-11	MIC not significant	FALSE	TRUE	FALSE	FALSE	FALSE	TRUE	FALSE	FALSE
pcodonTCGAGA	3971	0.0782284	0.000749971	0.261	0.314	0.267983	0.320847	247	0.288103	0.14717	0.000128713	0.999525	1.848e-06	0.996206	4.40571e-10	MIC not significant	FALSE	TRUE	FALSE	FALSE	FALSE	TRUE	FALSE	FALSE
pcodonTCGAGG	3971	0.080978	0.000341715	0.276	0.288	0.286602	0.296599	449	0.30062	0.195687	0	1	6.76951e-24	0.999996	6.15729e-23	MIC not significant	FALSE	TRUE	FALSE	FALSE	FALSE	TRUE	FALSE	FALSE
pcodonTCGGTC	3971	0.075225	4.8387e-08	0.587	0.558	0.611926	0.580689	241	0.221466	0.114611	0.154267	1	0.159063	0.999997	7.11638e-08	MIC not significant	FALSE	FALSE	FALSE	FALSE	FALSE	FALSE	FALSE	FALSE
pcodonTCGGTG	3971	0.0850346	0.00372415	0.017	0.127	0.0151704	0.121766	321	0.234813	0.0745312	0.002	0.852	0.000450765	0.849644	6.80467e-07	non-significant monotone/non-monotone	TRUE	TRUE	FALSE	FALSE	TRUE	TRUE	FALSE	FALSE
pcodonTCGGCT	3971	0.0903589	0.0143157	0.001	0.767	0.000258536	0.763289	427	0.259567	0.0922017	0	0.380485	4.1077e-12	0.406419	1.47356e-10	non-significant monotone/non-monotone	TRUE	TRUE	FALSE	FALSE	TRUE	TRUE	FALSE	FALSE
pcodonTCGGCC	3971	0.0783912	0.000550948	0.332	0.38	0.344945	0.377505	301	0.244909	0.118591	0.00414851	1	0.000795426	0.999734	8.32976e-10	MIC not significant	FALSE	TRUE	FALSE	FALSE	FALSE	TRUE	FALSE	FALSE
pcodonTCGGCA	3971	0.0856346	0.00651682	0.003	0.105	0.000490956	0.0952605	192	0.284362	0.077119	0.004	0.402	0.000527222	0.434524	9.62617e-05	non-significant monotone/non-monotone	TRUE	TRUE	FALSE	FALSE	TRUE	TRUE	FALSE	FALSE
pcodonTCGGCG	3971	0.0850113	0.00331762	0.057	0.246	0.0570565	0.244075	511	0.225737	0.116291	1.9802e-05	1	2.39627e-07	0.999991	2.21355e-15	MIC not significant	FALSE	TRUE	FALSE	FALSE	FALSE	TRUE	FALSE	FALSE
pcodonTCGGAC	3971	0.0740361	0.000932643	0.741	0.853	0.751738	0.842782	60	0.274816	0.0958435	0.327	0.928	0.363181	0.918416	0.0164187	MIC not significant	FALSE	FALSE	FALSE	FALSE	FALSE	FALSE	FALSE	FALSE
pcodonTCGGAA	3971	0.0844045	0.00536358	0.006	0.113	0.00194417	0.104492	191	0.328159	0.108559	0.000108911	0.244139	1.87878e-07	0.264364	3.25122e-06	non-significant monotone/non-monotone	TRUE	TRUE	FALSE	FALSE	TRUE	TRUE	FALSE	FALSE
pcodonTCGGAG	3971	0.0764241	0.00117089	0.236	0.34	0.247115	0.361085	126	0.265855	0.059859	0.242	0.846	0.249209	0.838693	0.00576186	MIC not significant	FALSE	FALSE	FALSE	FALSE	FALSE	FALSE	FALSE	FALSE
pcodonTCGGGT	3971	0.0981151	0.00795374	0	0.0049703	2.71839e-07	0.00276425	691	0.175714	0.0880078	0.00714019	1	0.0027341	1	1.66371e-15	Monotone	TRUE	TRUE	FALSE	TRUE	TRUE	TRUE	FALSE	TRUE
pcodonTCGGGC	3971	0.0771383	0.000467566	0.648	0.675	0.652841	0.679129	404	0.281015	0.177059	0	1	3.47517e-14	0.999999	9.11404e-19	MIC not significant	FALSE	TRUE	FALSE	FALSE	FALSE	TRUE	FALSE	FALSE
pcodonTCGGGA	3971	0.0851425	0.000136431	0.123	0.116	0.110186	0.103734	692	0.246561	0.156245	0	1	4.88516e-23	1	2.67153e-27	MIC not significant	FALSE	TRUE	FALSE	FALSE	FALSE	TRUE	FALSE	FALSE
pcodonTCGGGG	3971	0.0870093	0.00540678	0.014	0.228	0.0116209	0.22753	492	0.234102	0.144001	1.9802e-05	1	4.11757e-09	1	2.68057e-18	Monotone	TRUE	TRUE	FALSE	TRUE	TRUE	TRUE	FALSE	TRUE
pcodonTATTTT	3971	0.0983428	0.0172159	3.22581e-05	0.500903	5.64022e-07	0.513023	814	0.235673	0.0876012	0	0.0978911	4.76809e-28	0.0920477	6.38825e-18	non-significant monotone/non-monotone	TRUE	TRUE	FALSE	FALSE	TRUE	TRUE	FALSE	FALSE
pcodonTATTTC	3971	0.0815545	0.000346661	0.32	0.322	0.332969	0.343772	566	0.2505	0.172163	0	1	1.02979e-16	1	5.8212e-25	MIC not significant	FALSE	TRUE	FALSE	FALSE	FALSE	TRUE	FALSE	FALSE
pcodonTATTTA	3971	0.0810408	0.000453525	0.475	0.501	0.484946	0.506663	692	0.241695	0.185489	0	1	4.82183e-21	1	1.27307e-32	MIC not significant	FALSE	TRUE	FALSE	FALSE	FALSE	TRUE	FALSE	FALSE
pcodonTATTTG	3971	0.0972373	0.0213455	3.22581e-05	0.924903	8.96466e-07	0.920202	698	0.205789	0.0991548	0	1	1.18931e-09	0.999941	1.56712e-17	Monotone	TRUE	TRUE	FALSE	TRUE	TRUE	TRUE	FALSE	TRUE
pcodonTATTCT	3971	0.0869683	0.0104182	0.008	0.629	0.00445723	0.637396	375	0.239902	0.0989399	0.00050495	0.995465	1.29971e-05	0.987354	4.67426e-10	Monotone	TRUE	TRUE	FALSE	TRUE	TRUE	TRUE	FALSE	TRUE
pcodonTATTCC	3971	0.0741656	0.000486875	0.716	0.742	0.720968	0.745001	239	0.27244	0.124631	0.002	0.998	0.00045375	0.992676	2.0137e-08	MIC not significant	FALSE	TRUE	FALSE	FALSE	FALSE	TRUE	FALSE	FALSE
pcodonTATTCA	3971	0.0749467	0.00348049	0.425	0.839	0.446535	0.835869	147	0.230461	0.0502267	0.293	0.878	0.307869	0.873146	0.00635593	MIC not significant	FALSE	FALSE	FALSE	FALSE	FALSE	FALSE	FALSE	FALSE
pcodonTATTCG	3971	0.0773949	0.00202008	0.583	0.773	0.590162	0.776346	400	0.307098	0.184485	0	1	4.14014e-20	0.999728	2.18299e-19	MIC not significant	FALSE	TRUE	FALSE	FALSE	FALSE	TRUE	FALSE	FALSE
pcodonTATTAT	3971	0.0842887	0.00187188	0.182	0.337	0.184962	0.336446	755	0.198912	0.142141	0	1	8.28417e-10	1	6.52667e-27	MIC not significant	FALSE	TRUE	FALSE	FALSE	FALSE	TRUE	FALSE	FALSE
pcodonTATTAC	3971	0.0860108	0.0154268	0.002	0.946	0.000748888	0.937203	210	0.225687	0.0790907	0.22	0.998	0.233362	0.996317	3.55178e-05	MIC not significant	TRUE	FALSE	FALSE	FALSE	TRUE	FALSE	FALSE	FALSE
pcodonTATTAA	3971	0.084548	0.0140303	0.021	0.98	0.0182629	0.977896	336	0.288112	0.143287	0	0.995267	5.09351e-11	0.987021	6.88232e-13	Monotone	FALSE	TRUE	FALSE	FALSE	TRUE	TRUE	FALSE	TRUE
pcodonTATTAG	3971	0.0952595	0.0158267	0	0.245327	4.42493e-08	0.251319	324	0.259209	0.0894877	0.00039604	0.825149	1.09072e-05	0.823686	4.01883e-08	non-significant monotone/non-monotone	TRUE	TRUE	FALSE	FALSE	TRUE	TRUE	FALSE	FALSE
pcodonTATTGT	3971	0.0967675	0.0210144	9.90099e-06	0.784376	5.93581e-08	0.788844	435	0.251036	0.109931	9.90099e-06	0.989347	2.80398e-09	0.979002	1.2746e-12	Monotone	TRUE	TRUE	FALSE	TRUE	TRUE	TRUE	FALSE	TRUE
pcodonTATTGC	3971	0.0740307	4.91393e-06	0.865	0.847	0.869498	0.855	334	0.285457	0.175602	0	1	2.17333e-10	0.999994	1.23483e-15	MIC not significant	FALSE	TRUE	FALSE	FALSE	FALSE	TRUE	FALSE	FALSE
pcodonTATTGA	3971	0.0889355	0.00226072	0.003	0.009	0.000736053	0.00477889	383	0.229485	0.154427	0.000871287	1	7.14454e-05	1	1.35874e-15	Monotone	TRUE	TRUE	FALSE	TRUE	TRUE	TRUE	FALSE	TRUE
pcodonTATTGG	3971	0.0817242	0.00089258	0.394	0.47	0.376269	0.446882	633	0.236034	0.15029	0	1	3.72682e-17	1	3.93051e-24	MIC not significant	FALSE	TRUE	FALSE	FALSE	FALSE	TRUE	FALSE	FALSE
pcodonTATCTT	3971	0.0767632	0.000757749	0.805	0.845	0.799655	0.839671	523	0.222832	0.0893762	3.9604e-05	0.990238	1.11208e-07	0.979901	2.93379e-12	MIC not significant	FALSE	TRUE	FALSE	FALSE	FALSE	TRUE	FALSE	FALSE
pcodonTATCTC	3971	0.0783197	0.000359454	0.116	0.123	0.102768	0.105959	135	0.340481	0.213693	0.00190099	0.99998	0.000127286	0.999661	1.6598e-08	MIC not significant	FALSE	TRUE	FALSE	FALSE	FALSE	TRUE	FALSE	FALSE
pcodonTATCTA	3971	0.084863	0.00490401	0.007	0.109	0.00391323	0.105121	249	0.296206	0.134504	8.91089e-05	0.957465	1.40615e-07	0.940564	2.41248e-09	Monotone	TRUE	TRUE	FALSE	FALSE	TRUE	TRUE	FALSE	FALSE
pcodonTATCTG	3971	0.0783843	0.00339595	0.296	0.659	0.303842	0.669915	264	0.254632	0.0812252	0.006	0.882	0.00235008	0.876109	2.51748e-06	MIC not significant	FALSE	TRUE	FALSE	FALSE	FALSE	TRUE	FALSE	FALSE
pcodonTATCCT	3971	0.0798236	0.00017384	0.172	0.17	0.174294	0.166527	280	0.276624	0.164025	7.92079e-05	1	6.63024e-07	0.999977	1.77566e-12	MIC not significant	FALSE	TRUE	FALSE	FALSE	FALSE	TRUE	FALSE	FALSE
pcodonTATCCC	3971	0.0772671	0.00288233	0.16	0.469	0.155533	0.497537	96	0.241961	0.0664298	0.454	0.971	0.498199	0.949881	0.0112373	MIC not significant	FALSE	FALSE	FALSE	FALSE	FALSE	FALSE	FALSE	FALSE
pcodonTATCCA	3971	0.0850219	0.00456422	0.000387097	0.0187742	7.98412e-05	0.0129235	115	0.284439	0.118592	0.077	0.991	0.0619538	0.971589	0.000164182	MIC not significant	TRUE	FALSE	FALSE	FALSE	TRUE	FALSE	FALSE	FALSE
pcodonTATCCG	3971	0.0789758	0.000182737	0.204	0.193	0.211373	0.204936	242	0.357605	0.17117	0	0.674683	3.06839e-15	0.691104	2.00541e-11	MIC not significant	FALSE	TRUE	FALSE	FALSE	FALSE	TRUE	FALSE	FALSE
pcodonTATCAT	3971	0.0780973	0.00378314	0.109	0.64	0.101868	0.671948	57	0.425125	0.223738	0.005	0.843	0.000814999	0.834901	0.000202666	MIC not significant	FALSE	TRUE	FALSE	FALSE	FALSE	TRUE	FALSE	FALSE
pcodonTATCAC	3971	0.0753515	0.00220554	0.51	0.886	0.538061	0.878838	52	0.401508	0.0882718	0.045	0.189	0.0231885	0.214676	0.032834	MIC not significant	FALSE	FALSE	FALSE	FALSE	FALSE	TRUE	FALSE	FALSE
pcodonTATCAA	3971	0.0730752	0.00171276	0.968	1	0.948639	0.995037	44	0.313712	0.0864065	0.154	0.533	0.170135	0.573983	0.0527776	MIC not significant	FALSE	FALSE	FALSE	FALSE	FALSE	FALSE	FALSE	FALSE
pcodonTATCAG	3971	0.0817936	4.9442e-05	0.014	0.012	0.00596	0.00452994	129	0.268343	0.0899833	0.167	0.982	0.18548	0.969582	0.000552833	MIC not significant	TRUE	FALSE	FALSE	FALSE	TRUE	FALSE	FALSE	FALSE
pcodonTATCGT	3971	0.0808654	0.00422365	0.11	0.506	0.115956	0.514619	284	0.232101	0.115654	0.0144356	1	0.00645278	0.999934	4.05148e-09	MIC not significant	FALSE	TRUE	FALSE	FALSE	FALSE	TRUE	FALSE	FALSE
pcodonTATCGC	3971	0.0832616	0.00686099	0.0013871	0.221323	0.000302896	0.229837	82	0.36001	0.132707	0.022	0.787	0.0127397	0.790348	0.000766713	non-significant monotone/non-monotone	TRUE	TRUE	FALSE	FALSE	TRUE	TRUE	FALSE	FALSE
pcodonTATCGA	3971	0.0782504	0.0025805	0.148	0.368	0.147952	0.393064	176	0.271174	0.0923374	0.046	0.965	0.0270239	0.941584	4.13241e-05	MIC not significant	FALSE	FALSE	FALSE	FALSE	FALSE	TRUE	FALSE	FALSE
pcodonTATCGG	3971	0.0797877	0.00624165	0.059	0.628	0.0529417	0.642006	171	0.329203	0.176575	0.000217822	0.994584	8.27086e-07	0.983634	1.05433e-08	MIC not significant	FALSE	TRUE	FALSE	FALSE	FALSE	TRUE	FALSE	FALSE
pcodonTATATT	3971	0.0835496	0.00356597	0.291	0.65	0.285083	0.664112	858	0.221854	0.137281	0	1	2.7712e-23	1	2.60461e-29	MIC not significant	FALSE	TRUE	FALSE	FALSE	FALSE	TRUE	FALSE	FALSE
pcodonTATATC	3971	0.0827009	0.000182288	0.087	0.085	0.0832385	0.0803934	389	0.25361	0.151328	0	1	5.38476e-09	0.999998	1.67095e-15	MIC not significant	FALSE	TRUE	FALSE	FALSE	FALSE	TRUE	FALSE	FALSE
pcodonTATATA	3971	0.0872996	0.00426465	0.006	0.072	0.00379506	0.0691252	393	0.229418	0.102389	0.00189109	0.99998	0.000234963	0.999447	8.31814e-11	Monotone	TRUE	TRUE	FALSE	TRUE	TRUE	TRUE	FALSE	TRUE
pcodonTATATG	3971	0.087017	0.010321	0.038	0.864	0.0306917	0.857805	643	0.224027	0.109366	0	0.99999	2.65197e-12	0.9996	7.11492e-18	Monotone	FALSE	TRUE	FALSE	FALSE	FALSE	TRUE	FALSE	FALSE
pcodonTATACT	3971	0.0869465	0.00493699	0.003	0.081	0.00214611	0.0752467	317	0.320341	0.227575	0	1	2.74136e-17	1	2.02618e-19	Monotone	TRUE	TRUE	FALSE	TRUE	TRUE	TRUE	FALSE	TRUE
pcodonTATACC	3971	0.0791979	4.18891e-05	0.151	0.14	0.15399	0.140416	227	0.316494	0.180177	0	0.999594	2.73346e-09	0.996848	2.41381e-11	MIC not significant	FALSE	TRUE	FALSE	FALSE	FALSE	TRUE	FALSE	FALSE
pcodonTATACA	3971	0.0800096	0.00202707	0.031	0.092	0.0215509	0.0873105	103	0.38482	0.094627	0.003	0.122	0.000232546	0.131356	0.00157302	non-significant monotone/non-monotone	FALSE	TRUE	FALSE	FALSE	FALSE	TRUE	FALSE	FALSE
pcodonTATACG	3971	0.0827306	0.00123552	0.095	0.142	0.0921972	0.147068	378	0.273956	0.17703	0	1	1.74454e-11	1	1.19418e-17	MIC not significant	FALSE	TRUE	FALSE	FALSE	FALSE	TRUE	FALSE	FALSE
pcodonTATAAT	3971	0.0800682	0.00326377	0.074	0.295	0.0689195	0.295932	207	0.378958	0.145471	0	0.118782	3.36289e-14	0.116816	1.42745e-08	MIC not significant	FALSE	TRUE	FALSE	FALSE	FALSE	TRUE	FALSE	FALSE
pcodonTATAAC	3971	0.0737954	7.12812e-05	0.665	0.652	0.668865	0.64929	194	0.270208	0.104745	0.006	0.96	0.00299489	0.945287	4.16058e-06	MIC not significant	FALSE	TRUE	FALSE	FALSE	FALSE	TRUE	FALSE	FALSE
pcodonTATAAA	3971	0.0794111	0.0022832	0.043	0.157	0.0381205	0.157192	97	0.329082	0.151262	0.014	0.958	0.00445405	0.937256	8.25154e-05	Monotone	FALSE	TRUE	FALSE	FALSE	FALSE	TRUE	FALSE	FALSE
pcodonTATAAG	3971	0.0809288	0.00796867	0.234	0.943	0.237061	0.944502	413	0.241096	0.15227	2.9703e-05	1	3.28064e-07	1	1.79775e-16	MIC not significant	FALSE	TRUE	FALSE	FALSE	FALSE	TRUE	FALSE	FALSE
pcodonTATAGT	3971	0.0827917	0.0068338	0.027	0.473	0.0218322	0.491136	241	0.340451	0.172619	0	0.943465	2.02685e-12	0.927726	1.78366e-11	non-significant monotone/non-monotone	FALSE	TRUE	FALSE	FALSE	FALSE	TRUE	FALSE	FALSE
pcodonTATAGC	3971	0.0756112	0.000151055	0.466	0.448	0.481038	0.467946	198	0.264179	0.160095	0.0106634	1	0.00350129	0.999986	5.20973e-09	MIC not significant	FALSE	TRUE	FALSE	FALSE	FALSE	TRUE	FALSE	FALSE
pcodonTATAGA	3971	0.0756203	0.00288812	0.417	0.747	0.436604	0.757569	188	0.369305	0.17421	9.90099e-06	0.686089	1.57044e-11	0.703105	2.53857e-09	MIC not significant	FALSE	TRUE	FALSE	FALSE	FALSE	TRUE	FALSE	FALSE
pcodonTATAGG	3971	0.0876641	0.000312453	0.003	0.003	0.0022543	0.00239615	361	0.303239	0.188623	0	1	2.46642e-15	0.999987	4.86127e-18	Monotone	TRUE	TRUE	FALSE	TRUE	TRUE	TRUE	FALSE	TRUE
pcodonTATGTC	3971	0.0807016	0.000268072	0.122	0.119	0.112846	0.11266	279	0.295187	0.214137	1.9802e-05	1	2.98178e-09	1	3.27293e-16	MIC not significant	FALSE	TRUE	FALSE	FALSE	FALSE	TRUE	FALSE	FALSE
pcodonTATGTG	3971	0.0775762	0.0076606	0.471	0.993	0.490311	0.984557	327	0.293274	0.15511	0	0.999624	9.11326e-11	0.997597	1.40744e-13	MIC not significant	FALSE	TRUE	FALSE	FALSE	FALSE	TRUE	FALSE	FALSE
pcodonTATGCT	3971	0.0812396	0.00861601	0.182	0.943	0.184782	0.943592	367	0.250377	0.113657	0.000158416	0.999228	1.76921e-06	0.995774	3.32052e-11	MIC not significant	FALSE	TRUE	FALSE	FALSE	FALSE	TRUE	FALSE	FALSE
pcodonTATGCC	3971	0.0762717	0.00152545	0.368	0.529	0.377493	0.537879	195	0.265668	0.122643	0.0124752	0.999168	0.00489847	0.995215	5.20131e-07	MIC not significant	FALSE	TRUE	FALSE	FALSE	FALSE	TRUE	FALSE	FALSE
pcodonTATGCA	3971	0.0760761	0.00646023	0.3	0.973	0.316503	0.955324	155	0.321483	0.172594	0.002	0.999	0.000390051	0.997168	7.64371e-08	MIC not significant	FALSE	TRUE	FALSE	FALSE	FALSE	TRUE	FALSE	FALSE
pcodonTATGCG	3971	0.0834929	0.00255804	0.07	0.208	0.0653815	0.198923	389	0.218477	0.12217	0.00280198	1	0.000486941	1	1.27798e-12	MIC not significant	FALSE	TRUE	FALSE	FALSE	FALSE	TRUE	FALSE	FALSE
pcodonTATGAC	3971	0.0788629	0.00225667	0.049	0.22	0.0476387	0.216183	72	0.358463	0.14985	0.03	0.864	0.0159814	0.842454	0.000781687	non-significant monotone/non-monotone	FALSE	TRUE	FALSE	FALSE	FALSE	TRUE	FALSE	FALSE
pcodonTATGAA	3971	0.0755184	3.06754e-06	0.54	0.503	0.541114	0.512149	217	0.252067	0.092027	0.014	0.982	0.00851027	0.969678	5.34808e-06	MIC not significant	FALSE	TRUE	FALSE	FALSE	FALSE	TRUE	FALSE	FALSE
pcodonTATGAG	3971	0.0756774	0.000942422	0.361	0.442	0.385841	0.471451	153	0.268481	0.0994684	0.099	0.994	0.0833262	0.975692	7.15872e-05	MIC not significant	FALSE	FALSE	FALSE	FALSE	FALSE	FALSE	FALSE	FALSE
pcodonTATGGT	3971	0.0826505	0.00089111	0.17	0.227	0.17973	0.234715	542	0.245962	0.0991702	0	0.702851	5.31802e-15	0.717342	6.07981e-14	MIC not significant	FALSE	TRUE	FALSE	FALSE	FALSE	TRUE	FALSE	FALSE
pcodonTATGGC	3971	0.0815977	0.000160567	0.105	0.097	0.0930553	0.0871474	300	0.22575	0.150549	0.0320792	1	0.0216575	1	3.23163e-12	MIC not significant	FALSE	TRUE	FALSE	FALSE	FALSE	TRUE	FALSE	FALSE
pcodonTATGGA	3971	0.0817762	6.94606e-05	0.192	0.184	0.20334	0.19055	453	0.252924	0.153241	0	1	2.50497e-11	0.999999	4.85987e-18	MIC not significant	FALSE	TRUE	FALSE	FALSE	FALSE	TRUE	FALSE	FALSE
pcodonTATGGG	3971	0.0772925	0.000491641	0.74	0.756	0.731704	0.7546	505	0.227649	0.0967398	9.90099e-06	0.991366	6.7334e-09	0.981969	8.65736e-13	MIC not significant	FALSE	TRUE	FALSE	FALSE	FALSE	TRUE	FALSE	FALSE
pcodonTACTTT	3971	0.0927624	0.0147483	0.000193548	0.582097	3.06563e-05	0.590583	460	0.259782	0.166727	0	1	7.34688e-14	1	6.54628e-20	Monotone	TRUE	TRUE	FALSE	TRUE	TRUE	TRUE	FALSE	TRUE
pcodonTACTTC	3971	0.0851268	0.0167311	0.009	0.998	0.00667293	0.992407	298	0.28368	0.167926	9.90099e-06	1	9.01399e-08	0.999982	1.69978e-13	Monotone	TRUE	TRUE	FALSE	TRUE	TRUE	TRUE	FALSE	TRUE
pcodonTACTTA	3971	0.0848401	0.00655793	0.012	0.303	0.00802161	0.318526	295	0.300826	0.164862	9.90099e-06	0.999901	6.78604e-10	0.998661	3.8904e-13	Monotone	TRUE	TRUE	FALSE	TRUE	TRUE	TRUE	FALSE	TRUE
pcodonTACTTG	3971	0.0988455	0.0248072	0	0.910248	1.78307e-09	0.906471	436	0.244264	0.0968679	2.9703e-05	0.956703	4.3461e-08	0.942312	3.01335e-11	Monotone	TRUE	TRUE	FALSE	FALSE	TRUE	TRUE	FALSE	FALSE
pcodonTACTCT	3971	0.0816661	0.00918901	0.038	0.836	0.0310874	0.824252	221	0.272179	0.183367	0.00307921	1	0.000427681	1	2.87201e-11	Monotone	FALSE	TRUE	FALSE	FALSE	FALSE	TRUE	FALSE	FALSE
pcodonTACTCC	3971	0.0823329	0.00186542	0.01	0.022	0.00537525	0.0219917	136	0.308349	0.151629	0.012	0.995	0.00416995	0.98927	2.79319e-06	Monotone	TRUE	TRUE	FALSE	TRUE	TRUE	TRUE	FALSE	TRUE
pcodonTACTCA	3971	0.0778838	0.00590425	0.131	0.795	0.126951	0.803451	106	0.352576	0.157586	0.012	0.941	0.00346626	0.921093	2.51918e-05	MIC not significant	FALSE	TRUE	FALSE	FALSE	FALSE	TRUE	FALSE	FALSE
pcodonTACTCG	3971	0.0797799	0.00584385	0.089	0.641	0.0890483	0.650293	210	0.34839	0.238325	0	1	1.31408e-10	0.999991	5.64276e-14	MIC not significant	FALSE	TRUE	FALSE	FALSE	FALSE	TRUE	FALSE	FALSE
pcodonTACTAT	3971	0.0847761	0.00720852	0.004	0.183	0.000732757	0.187328	183	0.32458	0.22096	0.000366337	1	4.97936e-06	0.999997	1.89881e-11	Monotone	TRUE	TRUE	FALSE	TRUE	TRUE	TRUE	FALSE	TRUE
pcodonTACTAC	3971	0.0832083	0.00824802	0.006	0.452	0.00402107	0.460675	177	0.325786	0.127247	0.000722772	0.779614	2.03502e-05	0.78328	1.09653e-06	non-significant monotone/non-monotone	TRUE	TRUE	FALSE	FALSE	TRUE	TRUE	FALSE	FALSE
pcodonTACTAA	3971	0.0777731	0.00803883	0.096	0.96	0.0985687	0.955601	115	0.37515	0.226479	0.001	0.999	8.98515e-06	0.994768	7.64744e-08	MIC not significant	FALSE	TRUE	FALSE	FALSE	FALSE	TRUE	FALSE	FALSE
pcodonTACTAG	3971	0.0868358	0.0159023	0.001	0.944	0.000599652	0.946543	255	0.293265	0.0949864	2.9703e-05	0.27504	5.81331e-08	0.296604	5.16474e-07	non-significant monotone/non-monotone	TRUE	TRUE	FALSE	FALSE	TRUE	TRUE	FALSE	FALSE
pcodonTACTGT	3971	0.0884665	0.0124826	0.000387097	0.442452	5.93581e-05	0.459391	229	0.264803	0.0804726	0.019	0.848	0.00592177	0.84231	1.30537e-05	non-significant monotone/non-monotone	TRUE	TRUE	FALSE	FALSE	TRUE	TRUE	FALSE	FALSE
pcodonTACTGC	3971	0.0861588	0.00639588	0.000354839	0.0522258	0.000122954	0.0468346	166	0.408802	0.205679	0	0.573901	1.62175e-14	0.603165	8.45933e-10	non-significant monotone/non-monotone	TRUE	TRUE	FALSE	FALSE	TRUE	TRUE	FALSE	FALSE
pcodonTACTGA	3971	0.0874713	0.0115756	3.22581e-05	0.340355	2.86179e-05	0.35359	171	0.230454	0.0833538	0.211505	0.998248	0.225927	0.992097	0.000128371	MIC not significant	TRUE	FALSE	FALSE	FALSE	TRUE	FALSE	FALSE	FALSE
pcodonTACTGG	3971	0.0885963	0.0131101	0.000806452	0.671387	0.000329851	0.678593	307	0.258913	0.125025	0.000514851	0.999713	1.15478e-05	0.998047	1.80242e-10	Monotone	TRUE	TRUE	FALSE	TRUE	TRUE	TRUE	FALSE	TRUE
pcodonTACCTT	3971	0.0879256	0.0116338	0.000580645	0.461742	0.000214349	0.474182	254	0.324645	0.149623	0	0.763406	2.86281e-12	0.769366	1.71847e-10	non-significant monotone/non-monotone	TRUE	TRUE	FALSE	FALSE	TRUE	TRUE	FALSE	FALSE
pcodonTACCTC	3971	0.0769411	0.00511552	0.193	0.899	0.196547	0.891666	74	0.4226	0.144966	0.001	0.207	9.0496e-05	0.235115	0.000818317	MIC not significant	FALSE	TRUE	FALSE	FALSE	FALSE	TRUE	FALSE	FALSE
pcodonTACCTA	3971	0.0840858	0.00894254	0.002	0.408	0.000313492	0.41498	110	0.319053	0.0649786	0.029	0.291	0.019045	0.323895	0.00719855	non-significant monotone/non-monotone	TRUE	TRUE	FALSE	FALSE	TRUE	TRUE	FALSE	FALSE
pcodonTACCTG	3971	0.0780303	0.00842476	0.117	0.967	0.114546	0.956509	117	0.283717	0.0742815	0.07	0.685	0.0635535	0.707709	0.00295019	MIC not significant	FALSE	FALSE	FALSE	FALSE	FALSE	FALSE	FALSE	FALSE
pcodonTACCCT	3971	0.0766432	0.00291531	0.225	0.572	0.222395	0.589681	103	0.337609	0.161086	0.029	0.993	0.016978	0.975684	2.64952e-05	MIC not significant	FALSE	TRUE	FALSE	FALSE	FALSE	TRUE	FALSE	FALSE
pcodonTACCCC	3971	0.0760534	0.00494189	0.382	0.999	0.392699	0.988235	53	0.420057	0.15924	0.017	0.509	0.00555199	0.542099	0.00329109	MIC not significant	FALSE	TRUE	FALSE	FALSE	FALSE	TRUE	FALSE	FALSE
pcodonTACCCG	3971	0.0804399	0.00664598	0.021	0.536	0.0178104	0.572729	109	0.267474	0.107434	0.264	0.999	0.297312	0.990547	0.000502886	MIC not significant	FALSE	FALSE	FALSE	FALSE	TRUE	FALSE	FALSE	FALSE
pcodonTACCAG	3971	0.0742464	0.00124892	0.794	0.968	0.803162	0.942013	42	0.477867	0.0558692	0.005	0.007	0.000371878	0.00116467	0.131592	MIC not significant	FALSE	TRUE	FALSE	FALSE	FALSE	TRUE	FALSE	FALSE
pcodonTACCGT	3971	0.0804927	0.00503291	0.02	0.368	0.0101111	0.383651	78	0.347882	0.103716	0.017	0.386	0.00706889	0.421219	0.00403556	non-significant monotone/non-monotone	FALSE	TRUE	FALSE	FALSE	TRUE	TRUE	FALSE	FALSE
pcodonTACCGA	3971	0.0786132	0.00427183	0.058	0.659	0.0508421	0.668522	53	0.405875	0.157117	0.019	0.557	0.00756687	0.595661	0.00330049	MIC not significant	FALSE	TRUE	FALSE	FALSE	FALSE	TRUE	FALSE	FALSE
pcodonTACCGG	3971	0.0771988	0.006218	0.174	0.908	0.166289	0.90506	95	0.342844	0.209155	0.003	0.999	0.00202646	0.997984	4.11261e-06	MIC not significant	FALSE	TRUE	FALSE	FALSE	FALSE	TRUE	FALSE	FALSE
pcodonTACATT	3971	0.0808791	0.0107741	0.198	0.992	0.202268	0.990006	366	0.211289	0.0946547	0.0296733	1	0.0193324	0.999959	1.83028e-09	MIC not significant	FALSE	TRUE	FALSE	FALSE	FALSE	TRUE	FALSE	FALSE
pcodonTACATC	3971	0.0817032	0.0053249	0.023	0.318	0.0170475	0.31219	189	0.269357	0.14177	0.0169604	0.99999	0.00774717	0.999683	9.30358e-08	Monotone	FALSE	TRUE	FALSE	FALSE	TRUE	TRUE	FALSE	TRUE
pcodonTACATA	3971	0.077776	0.00483196	0.172	0.697	0.171866	0.707946	178	0.344854	0.141987	8.91089e-05	0.698554	3.64251e-07	0.713917	2.16886e-07	MIC not significant	FALSE	TRUE	FALSE	FALSE	FALSE	TRUE	FALSE	FALSE
pcodonTACATG	3971	0.0841645	0.010968	0.031	0.926	0.0316893	0.927221	373	0.281088	0.140081	0	0.995673	2.57432e-12	0.987538	7.5637e-14	Monotone	FALSE	TRUE	FALSE	FALSE	FALSE	TRUE	FALSE	FALSE
pcodonTACACT	3971	0.0809363	0.00532035	0.014	0.335	0.0138824	0.336768	148	0.315277	0.0696969	0.011	0.253	0.00243188	0.276141	0.00118608	non-significant monotone/non-monotone	TRUE	TRUE	FALSE	FALSE	TRUE	TRUE	FALSE	FALSE
pcodonTACACC	3971	0.0795766	0.00101894	0.043	0.076	0.0383647	0.0676915	129	0.32323	0.090973	0.012	0.496	0.00445301	0.526751	0.000513469	non-significant monotone/non-monotone	FALSE	TRUE	FALSE	FALSE	FALSE	TRUE	FALSE	FALSE
pcodonTACACA	3971	0.076552	0.00150341	0.271	0.551	0.28283	0.580038	45	0.251692	0.0954213	0.484	0.955	0.542015	0.924715	0.0389541	MIC not significant	FALSE	FALSE	FALSE	FALSE	FALSE	FALSE	FALSE	FALSE
pcodonTACACG	3971	0.0844866	0.00248957	0.001	0.008	0.000674606	0.00664068	164	0.25627	0.0836391	0.091	0.96	0.0846889	0.947437	0.000172736	MIC not significant	TRUE	FALSE	FALSE	FALSE	TRUE	FALSE	FALSE	FALSE
pcodonTACAAT	3971	0.0777874	0.00537553	0.125	0.764	0.125442	0.764829	136	0.381699	0.169701	5.94059e-05	0.649564	1.44336e-07	0.672467	6.26646e-07	MIC not significant	FALSE	TRUE	FALSE	FALSE	FALSE	TRUE	FALSE	FALSE
pcodonTACAAC	3971	0.0778348	0.00260705	0.111	0.367	0.116944	0.376897	104	0.372644	0.226099	0.00414851	0.999713	0.000542091	0.998016	3.38145e-07	MIC not significant	FALSE	TRUE	FALSE	FALSE	FALSE	TRUE	FALSE	FALSE
pcodonTACAAA	3971	0.075371	0.00171435	0.374	0.615	0.41411	0.646232	83	0.49772	0.156807	0.000118812	0.0373069	2.23285e-08	0.024962	0.000210885	MIC not significant	FALSE	TRUE	FALSE	FALSE	FALSE	TRUE	FALSE	FALSE
pcodonTACAAG	3971	0.0814324	0.00230571	0.055	0.157	0.0483438	0.146101	230	0.304887	0.143083	0.000346535	0.99196	2.53764e-06	0.980609	3.0838e-09	MIC not significant	FALSE	TRUE	FALSE	FALSE	FALSE	TRUE	FALSE	FALSE
pcodonTACAGT	3971	0.0824138	0.00590648	0.002	0.194	0.00149627	0.196311	111	0.268876	0.125423	0.230574	0.999772	0.250794	0.997699	0.00015096	MIC not significant	TRUE	FALSE	FALSE	FALSE	TRUE	FALSE	FALSE	FALSE
pcodonTACAGC	3971	0.077537	0.000411129	0.12	0.13	0.130643	0.14488	74	0.270266	0.125101	0.371	0.998	0.402727	0.991179	0.00199216	MIC not significant	FALSE	FALSE	FALSE	FALSE	FALSE	FALSE	FALSE	FALSE
pcodonTACAGA	3971	0.0786178	0.00506573	0.077	0.611	0.0657095	0.634956	87	0.273371	0.0702986	0.363	0.911	0.393567	0.894719	0.0130695	MIC not significant	FALSE	FALSE	FALSE	FALSE	FALSE	FALSE	FALSE	FALSE
pcodonTACAGG	3971	0.081768	0.0113163	0.031	0.94	0.0235547	0.933192	204	0.316117	0.192607	0.000267327	1	4.10083e-06	0.999936	5.16936e-11	Monotone	FALSE	TRUE	FALSE	FALSE	FALSE	TRUE	FALSE	FALSE
pcodonTACGTC	3971	0.0783395	0.00367456	0.089	0.43	0.0775959	0.449741	119	0.296103	0.0808373	0.038	0.539	0.0210608	0.580932	0.00172585	MIC not significant	FALSE	FALSE	FALSE	FALSE	FALSE	TRUE	FALSE	FALSE
pcodonTACGTG	3971	0.0831662	0.0111994	0.007	0.789	0.00263503	0.78458	145	0.294926	0.146978	0.014	0.999	0.00341497	0.989694	1.93923e-06	Monotone	TRUE	TRUE	FALSE	TRUE	TRUE	TRUE	FALSE	TRUE
pcodonTACGCT	3971	0.0870935	0.0118822	0.006	0.511	0.00035401	0.527426	218	0.290245	0.144314	0.000574257	0.998475	2.2611e-05	0.993416	6.81441e-09	Monotone	TRUE	TRUE	FALSE	TRUE	TRUE	TRUE	FALSE	TRUE
pcodonTACGCC	3971	0.0795126	0.00483222	0.073	0.483	0.0687769	0.497319	168	0.287676	0.123285	0.013	0.974	0.00296166	0.953307	3.06377e-06	MIC not significant	FALSE	TRUE	FALSE	FALSE	FALSE	TRUE	FALSE	FALSE
pcodonTACGCA	3971	0.0755085	0.00641314	0.399	0.997	0.408661	0.992569	79	0.344324	0.237262	0.0189406	0.999881	0.00701549	0.999285	5.30811e-06	MIC not significant	FALSE	TRUE	FALSE	FALSE	FALSE	TRUE	FALSE	FALSE
pcodonTACGCG	3971	0.0807254	0.00612752	0.082	0.662	0.0807939	0.675067	247	0.270708	0.093313	0.00127723	0.776416	8.22134e-05	0.781095	9.88102e-07	MIC not significant	FALSE	TRUE	FALSE	FALSE	FALSE	TRUE	FALSE	FALSE
pcodonTACGAA	3971	0.0780044	0.00385619	0.12	0.584	0.103318	0.613216	75	0.403156	0.0882276	0.003	0.058	0.000182036	0.0370172	0.00965771	MIC not significant	FALSE	TRUE	FALSE	FALSE	FALSE	TRUE	FALSE	FALSE
pcodonTACGAG	3971	0.0748007	0.000567334	0.561	0.627	0.592941	0.652427	61	0.42218	0.286177	0.001	0.997	0.000339455	0.984628	1.23756e-05	MIC not significant	FALSE	TRUE	FALSE	FALSE	FALSE	TRUE	FALSE	FALSE
pcodonTACGGT	3971	0.0793336	0.00895916	0.095	0.933	0.0826974	0.929483	185	0.263053	0.0987023	0.02	0.985	0.0163173	0.977758	1.33079e-05	MIC not significant	FALSE	TRUE	FALSE	FALSE	FALSE	TRUE	FALSE	FALSE
pcodonTACGGC	3971	0.0737535	0.00380522	0.621	0.942	0.627686	0.93585	135	0.312098	0.133713	0.01	0.967	0.00293023	0.945994	1.29361e-05	MIC not significant	FALSE	TRUE	FALSE	FALSE	FALSE	TRUE	FALSE	FALSE
pcodonTACGGA	3971	0.0852264	0.00794189	0.00103226	0.183129	0.000319022	0.184938	160	0.262692	0.10001	0.064	0.998	0.0523352	0.986766	4.62354e-05	MIC not significant	TRUE	FALSE	FALSE	FALSE	TRUE	FALSE	FALSE	FALSE
pcodonTACGGG	3971	0.084192	0.0118135	0.004	0.797	0.00215494	0.801683	194	0.257339	0.0721059	0.027	0.767	0.0143229	0.77094	0.000153262	non-significant monotone/non-monotone	TRUE	TRUE	FALSE	FALSE	TRUE	TRUE	FALSE	FALSE
pcodonTAATTT	3971	0.104951	0.0251995	0	0.456941	1.17892e-13	0.466298	529	0.243332	0.124054	0	0.99998	5.95515e-13	0.999325	6.77889e-17	Monotone	TRUE	TRUE	FALSE	TRUE	TRUE	TRUE	FALSE	TRUE
pcodonTAATTC	3971	0.079244	0.00842406	0.154	0.939	0.151432	0.929748	233	0.306312	0.187536	7.92079e-05	1	6.74703e-07	0.999969	4.54758e-12	MIC not significant	FALSE	TRUE	FALSE	FALSE	FALSE	TRUE	FALSE	FALSE
pcodonTAATTA	3971	0.0844616	0.00626638	0.028	0.414	0.0211849	0.422271	345	0.251544	0.13691	0.000138614	1	2.29707e-06	0.999958	1.23542e-12	Monotone	FALSE	TRUE	FALSE	FALSE	FALSE	TRUE	FALSE	FALSE
pcodonTAATTG	3971	0.0949917	0.0201102	0	0.719663	3.7775e-08	0.726208	300	0.210976	0.0560492	0.116	0.978	0.114348	0.969282	3.43537e-05	MIC not significant	TRUE	FALSE	FALSE	FALSE	TRUE	FALSE	FALSE	FALSE
pcodonTAATCT	3971	0.0833218	0.00505518	0.006	0.125	0.00296893	0.118627	172	0.370381	0.273707	9.90099e-06	1	3.99304e-11	0.999996	1.80093e-13	Monotone	TRUE	TRUE	FALSE	TRUE	TRUE	TRUE	FALSE	TRUE
pcodonTAATCC	3971	0.0770349	0.00389815	0.175	0.642	0.18218	0.660926	109	0.273214	0.0307365	0.214	0.42	0.23317	0.464949	0.0682393	MIC not significant	FALSE	FALSE	FALSE	FALSE	FALSE	FALSE	FALSE	FALSE
pcodonTAATCA	3971	0.0825826	0.00600873	0.005	0.239	0.000864173	0.242141	70	0.357171	0.163055	0.044	0.952	0.0244393	0.925966	0.000527342	Monotone	TRUE	FALSE	FALSE	FALSE	TRUE	TRUE	FALSE	FALSE
pcodonTAATCG	3971	0.0793023	0.00900338	0.067	0.938	0.0568104	0.925457	129	0.347666	0.206472	0.00285149	0.999901	0.000259408	0.99884	6.33636e-08	MIC not significant	FALSE	TRUE	FALSE	FALSE	FALSE	TRUE	FALSE	FALSE
pcodonTAATAT	3971	0.084178	0.0097467	0.009	0.605	0.00395019	0.609901	211	0.224975	0.0537577	0.236	0.961	0.255206	0.937191	0.000688081	MIC not significant	TRUE	FALSE	FALSE	FALSE	TRUE	FALSE	FALSE	FALSE
pcodonTAATAC	3971	0.080137	0.00862565	0.02	0.892	0.0148605	0.896461	84	0.353616	0.0790019	0.041	0.309	0.0238557	0.35386	0.00960006	non-significant monotone/non-monotone	FALSE	FALSE	FALSE	FALSE	TRUE	TRUE	FALSE	FALSE
pcodonTAATAA	3971	0.0792088	0.00466337	0.04	0.437	0.0358716	0.455043	111	0.366359	0.154089	0.001	0.73	9.72232e-05	0.75929	2.03324e-05	non-significant monotone/non-monotone	FALSE	TRUE	FALSE	FALSE	FALSE	TRUE	FALSE	FALSE
pcodonTAATAG	3971	0.0790214	0.00707574	0.057	0.821	0.0522967	0.816921	111	0.298984	0.133232	0.073	0.996	0.0569191	0.982387	8.18643e-05	MIC not significant	FALSE	FALSE	FALSE	FALSE	FALSE	FALSE	FALSE	FALSE
pcodonTAATGT	3971	0.0912898	0.0138436	3.22581e-05	0.229645	2.91379e-07	0.233635	201	0.323656	0.178502	0.000188119	0.999891	1.93589e-06	0.998423	4.16943e-10	Monotone	TRUE	TRUE	FALSE	TRUE	TRUE	TRUE	FALSE	TRUE
pcodonTAATGC	3971	0.0776291	0.00169097	0.125	0.274	0.136104	0.278113	124	0.405981	0.148113	0.000148515	0.27296	4.19355e-07	0.296679	1.01773e-05	MIC not significant	FALSE	TRUE	FALSE	FALSE	FALSE	TRUE	FALSE	FALSE
pcodonTAATGA	3971	0.0806739	0.00407912	0.027	0.218	0.0202278	0.230564	144	0.239482	0.0173551	0.242	0.369	0.274954	0.412959	0.115498	MIC not significant	FALSE	FALSE	FALSE	FALSE	TRUE	FALSE	FALSE	FALSE
pcodonTAATGG	3971	0.0816067	0.00621308	0.056	0.555	0.0525179	0.561855	238	0.298025	0.180712	0.000128713	1	1.67586e-06	0.999977	7.31395e-12	MIC not significant	FALSE	TRUE	FALSE	FALSE	FALSE	TRUE	FALSE	FALSE
pcodonTAACTT	3971	0.0924678	0.0138147	1.9802e-05	0.279436	1.54845e-06	0.286385	295	0.31033	0.186066	0	1	1.8008e-11	0.999891	8.48078e-15	Monotone	TRUE	TRUE	FALSE	TRUE	TRUE	TRUE	FALSE	TRUE
pcodonTAACTC	3971	0.0786566	0.00277196	0.085	0.311	0.0667689	0.330518	73	0.28452	0.146835	0.262	0.998	0.287949	0.994989	0.000819337	MIC not significant	FALSE	FALSE	FALSE	FALSE	FALSE	FALSE	FALSE	FALSE
pcodonTAACTA	3971	0.0813575	0.00586789	0.015	0.325	0.00963486	0.333818	135	0.33517	0.241654	0.00293069	1	0.000243382	0.999997	1.40998e-09	Monotone	TRUE	TRUE	FALSE	TRUE	TRUE	TRUE	FALSE	TRUE
pcodonTAACTG	3971	0.0815178	0.00667496	0.017	0.418	0.0108409	0.438891	146	0.348217	0.13171	0.000257426	0.40199	1.12247e-06	0.43757	6.73398e-06	non-significant monotone/non-monotone	TRUE	TRUE	FALSE	FALSE	TRUE	TRUE	FALSE	FALSE
pcodonTAACCT	3971	0.0777245	0.0081314	0.209	0.959	0.21255	0.954194	185	0.24858	0.0590799	0.113	0.825	0.101554	0.819883	0.000856825	MIC not significant	FALSE	FALSE	FALSE	FALSE	FALSE	FALSE	FALSE	FALSE
pcodonTAACCC	3971	0.0764501	0.00474096	0.257	0.92	0.260304	0.917207	72	0.464213	0.188937	0.001	0.24	1.53545e-06	0.282353	0.000136044	MIC not significant	FALSE	TRUE	FALSE	FALSE	FALSE	TRUE	FALSE	FALSE
pcodonTAACCA	3971	0.0779053	0.00563967	0.118	0.96	0.108396	0.94494	53	0.432793	0.118274	0.008	0.177	0.00205103	0.170951	0.0116879	MIC not significant	FALSE	TRUE	FALSE	FALSE	FALSE	TRUE	FALSE	FALSE
pcodonTAACCG	3971	0.0821643	0.00887036	0.013	0.64	0.00587397	0.641444	146	0.271218	0.0638418	0.032	0.526	0.0209429	0.535762	0.00209195	non-significant monotone/non-monotone	TRUE	TRUE	FALSE	FALSE	TRUE	TRUE	FALSE	FALSE
pcodonTAACAT	3971	0.0802656	0.0084895	0.009	0.988	0.00313505	0.972478	51	0.404258	0.175846	0.037	0.769	0.0207574	0.777298	0.00219142	non-significant monotone/non-monotone	TRUE	FALSE	FALSE	FALSE	TRUE	TRUE	FALSE	FALSE
pcodonTAACAG	3971	0.0762662	0.00191454	0.292	0.546	0.302176	0.571858	75	0.384608	0.180148	0.006	0.824	0.00100991	0.825647	0.000169653	MIC not significant	FALSE	TRUE	FALSE	FALSE	FALSE	TRUE	FALSE	FALSE
pcodonTAACGT	3971	0.0817156	0.00642821	0.013	0.419	0.013332	0.441233	176	0.365221	0.167416	2.9703e-05	0.789218	7.80603e-09	0.791403	1.71736e-08	non-significant monotone/non-monotone	TRUE	TRUE	FALSE	FALSE	TRUE	TRUE	FALSE	FALSE
pcodonTAACGC	3971	0.0786824	0.00648591	0.076	0.898	0.0597417	0.891457	68	0.464861	0.183177	0.003	0.301	2.43499e-05	0.324004	0.000271867	MIC not significant	FALSE	TRUE	FALSE	FALSE	FALSE	TRUE	FALSE	FALSE
pcodonTAACGA	3971	0.0779738	0.00372294	0.112	0.493	0.106439	0.499322	127	0.307279	0.132385	0.043	0.988	0.0268058	0.976722	2.61235e-05	MIC not significant	FALSE	FALSE	FALSE	FALSE	FALSE	TRUE	FALSE	FALSE
pcodonTAACGG	3971	0.0796536	0.0080766	0.056	0.813	0.046959	0.823453	142	0.234649	0.117319	0.326376	0.99999	0.356389	0.99984	3.01374e-05	MIC not significant	FALSE	FALSE	FALSE	FALSE	FALSE	FALSE	FALSE	FALSE
pcodonTAAATT	3971	0.0855178	0.00726548	0.015	0.468	0.0172135	0.476232	381	0.219968	0.124892	0.0039802	1	0.000987255	1	1.19431e-12	Monotone	TRUE	TRUE	FALSE	TRUE	TRUE	TRUE	FALSE	TRUE
pcodonTAAATC	3971	0.0736436	0.00169654	0.634	0.806	0.653896	0.805835	174	0.363385	0.129883	4.9505e-05	0.26996	2.44484e-08	0.292629	1.03532e-06	MIC not significant	FALSE	TRUE	FALSE	FALSE	FALSE	TRUE	FALSE	FALSE
pcodonTAAATA	3971	0.078074	0.00553534	0.139	0.758	0.154959	0.756104	171	0.375823	0.245562	9.90099e-06	0.999911	1.42914e-11	0.998936	5.5457e-12	MIC not significant	FALSE	TRUE	FALSE	FALSE	FALSE	TRUE	FALSE	FALSE
pcodonTAAATG	3971	0.0846376	0.0114849	0.018	0.877	0.0128702	0.87082	304	0.289508	0.164831	1.9802e-05	1	2.5056e-09	0.999786	1.71417e-13	Monotone	TRUE	TRUE	FALSE	TRUE	TRUE	TRUE	FALSE	TRUE
pcodonTAAACT	3971	0.0780576	0.00528749	0.17	0.749	0.172967	0.738099	174	0.282053	0.0844723	0.03	0.808	0.0175808	0.811648	0.000100034	MIC not significant	FALSE	TRUE	FALSE	FALSE	FALSE	TRUE	FALSE	FALSE
pcodonTAAACC	3971	0.0736226	0.000133543	0.64	0.63	0.643382	0.62756	120	0.383949	0.124272	9.90099e-05	0.11195	3.76044e-07	0.109074	7.8543e-05	MIC not significant	FALSE	TRUE	FALSE	FALSE	FALSE	TRUE	FALSE	FALSE
pcodonTAAACA	3971	0.0806031	0.00258777	0.01	0.079	0.00467318	0.0683796	67	0.262503	0.0259048	0.628	0.748	0.656032	0.744919	0.193211	MIC not significant	TRUE	FALSE	FALSE	FALSE	TRUE	FALSE	FALSE	FALSE
pcodonTAAACG	3971	0.0797473	0.00287468	0.102	0.311	0.102663	0.323076	207	0.342759	0.150415	9.90099e-06	0.746475	2.94041e-09	0.755591	7.75303e-09	MIC not significant	FALSE	TRUE	FALSE	FALSE	FALSE	TRUE	FALSE	FALSE
pcodonTAAAAT	3971	0.0794264	0.0050888	0.04	0.532	0.0345049	0.556744	78	0.349173	0.236929	0.018198	0.999861	0.00665137	0.998931	6.22092e-06	Monotone	FALSE	TRUE	FALSE	FALSE	FALSE	TRUE	FALSE	FALSE
pcodonTAAAAC	3971	0.0772292	0.00146472	0.14	0.282	0.143955	0.284707	92	0.408253	0.188218	0.001	0.678	3.4993e-05	0.719395	1.55817e-05	MIC not significant	FALSE	TRUE	FALSE	FALSE	FALSE	TRUE	FALSE	FALSE
pcodonTAAAAG	3971	0.0740288	0.000303869	0.553	0.562	0.573954	0.582498	136	0.236862	0.106586	0.39201	0.99997	0.42852	0.999396	0.000104878	MIC not significant	FALSE	FALSE	FALSE	FALSE	FALSE	FALSE	FALSE	FALSE
pcodonTAAAGT	3971	0.0821679	0.00750782	0.006	0.441	0.00393525	0.467784	116	0.393683	0.209667	0.000148515	0.932812	4.02153e-07	0.912848	2.36486e-07	non-significant monotone/non-monotone	TRUE	TRUE	FALSE	FALSE	TRUE	TRUE	FALSE	FALSE
pcodonTAAAGC	3971	0.0738169	0.00116335	0.649	0.783	0.661355	0.787689	85	0.429299	0.207256	0.001	0.833	2.50195e-05	0.814505	1.19977e-05	MIC not significant	FALSE	TRUE	FALSE	FALSE	FALSE	TRUE	FALSE	FALSE
pcodonTAAAGA	3971	0.079992	0.00352102	0.029	0.201	0.0187113	0.207246	96	0.259099	0.0698975	0.282	0.891	0.313032	0.883472	0.00924241	MIC not significant	FALSE	FALSE	FALSE	FALSE	TRUE	FALSE	FALSE	FALSE
pcodonTAAAGG	3971	0.0801333	0.00410123	0.051	0.313	0.0439724	0.324069	155	0.250516	0.0925588	0.189	0.997	0.209771	0.99017	0.00011876	MIC not significant	FALSE	FALSE	FALSE	FALSE	FALSE	FALSE	FALSE	FALSE
pcodonTAAGTC	3971	0.0775362	0.00499279	0.155	0.735	0.154009	0.748053	133	0.262773	0.100848	0.148	0.994	0.156974	0.989544	0.000195578	MIC not significant	FALSE	FALSE	FALSE	FALSE	FALSE	FALSE	FALSE	FALSE
pcodonTAAGTG	3971	0.0830137	0.0115554	0.004	0.868	0.0041962	0.869676	178	0.419867	0.174036	0	0.123515	9.84048e-16	0.122352	6.91721e-09	non-significant monotone/non-monotone	TRUE	TRUE	FALSE	FALSE	TRUE	TRUE	FALSE	FALSE
pcodonTAAGCT	3971	0.0792448	0.00774672	0.105	0.872	0.0983721	0.864372	178	0.33944	0.225353	0.00019802	1	1.0249e-06	0.99998	2.164e-11	MIC not significant	FALSE	TRUE	FALSE	FALSE	FALSE	TRUE	FALSE	FALSE
pcodonTAAGCC	3971	0.0761192	0.00447404	0.259	0.862	0.273092	0.864665	92	0.233789	0.0515516	0.676	0.966	0.704839	0.950249	0.0295164	MIC not significant	FALSE	FALSE	FALSE	FALSE	FALSE	FALSE	FALSE	FALSE
pcodonTAAGCA	3971	0.0790759	0.0045115	0.061	0.465	0.0437013	0.487928	89	0.318841	0.161113	0.074	0.997	0.061437	0.989337	9.68149e-05	MIC not significant	FALSE	FALSE	FALSE	FALSE	FALSE	FALSE	FALSE	FALSE
pcodonTAAGCG	3971	0.077617	0.00485791	0.222	0.718	0.216253	0.737759	176	0.328181	0.163155	0.001	0.995	1.53941e-05	0.983598	2.71031e-08	MIC not significant	FALSE	TRUE	FALSE	FALSE	FALSE	TRUE	FALSE	FALSE
pcodonTAAGAA	3971	0.0755075	0.00210444	0.359	0.651	0.371231	0.654108	95	0.320247	0.208217	0.019	0.999	0.0118647	0.999765	3.36146e-06	MIC not significant	FALSE	TRUE	FALSE	FALSE	FALSE	TRUE	FALSE	FALSE
pcodonTAAGAG	3971	0.0756872	0.00138579	0.409	0.616	0.432819	0.635946	64	0.357163	0.245686	0.0919703	0.99996	0.0838189	0.999656	3.11948e-05	MIC not significant	FALSE	FALSE	FALSE	FALSE	FALSE	FALSE	FALSE	FALSE
pcodonTAAGGT	3971	0.084065	0.0132535	0.015	0.964	0.0113778	0.953031	267	0.248673	0.0482133	0.007	0.3	0.00234603	0.336582	0.000300029	non-significant monotone/non-monotone	TRUE	TRUE	FALSE	FALSE	TRUE	TRUE	FALSE	FALSE
pcodonTAAGGC	3971	0.0746874	0.00403914	0.549	0.92	0.576818	0.918105	194	0.248147	0.0673471	0.054	0.822	0.0451432	0.813421	0.000258142	MIC not significant	FALSE	FALSE	FALSE	FALSE	FALSE	FALSE	FALSE	FALSE
pcodonTAAGGA	3971	0.0804859	0.00737644	0.084	0.774	0.0770445	0.775953	219	0.285114	0.104051	0.001	0.772	5.30936e-05	0.775978	1.07565e-06	MIC not significant	FALSE	TRUE	FALSE	FALSE	FALSE	TRUE	FALSE	FALSE
pcodonTAAGGG	3971	0.0856238	0.00805853	0.005	0.358	0.00324765	0.373814	274	0.217171	0.110951	0.0986634	1	0.0921607	0.999997	1.59838e-08	MIC not significant	TRUE	FALSE	FALSE	FALSE	TRUE	FALSE	FALSE	FALSE
pcodonTAGTTT	3971	0.0956217	0.020648	3.22581e-05	0.914226	2.25071e-06	0.9097	538	0.213019	0.113544	0.000108911	1	9.66297e-07	0.999999	9.45508e-16	Monotone	TRUE	TRUE	FALSE	TRUE	TRUE	TRUE	FALSE	TRUE
pcodonTAGTTC	3971	0.0896574	0.0119844	0.001	0.417	0.000105914	0.442635	325	0.231973	0.0733698	0.011	0.954	0.00454269	0.941106	7.14724e-07	Monotone	TRUE	TRUE	FALSE	FALSE	TRUE	TRUE	FALSE	FALSE
pcodonTAGTTA	3971	0.0806206	0.00565981	0.157	0.734	0.154582	0.733821	306	0.242323	0.136307	0.00391089	1	0.000761706	0.999998	2.57577e-11	MIC not significant	FALSE	TRUE	FALSE	FALSE	FALSE	TRUE	FALSE	FALSE
pcodonTAGTTG	3971	0.113695	0.0358426	0	0.652634	1.53961e-23	0.660788	510	0.222209	0.0927348	0.000138614	0.999	1.12043e-06	0.995694	2.09755e-12	Monotone	TRUE	TRUE	FALSE	TRUE	TRUE	TRUE	FALSE	TRUE
pcodonTAGTCT	3971	0.0870053	0.0145636	0.00116129	0.858742	0.000519839	0.85765	245	0.295194	0.137531	7.92079e-05	0.983475	5.07043e-07	0.969421	2.09814e-09	Monotone	TRUE	TRUE	FALSE	TRUE	TRUE	TRUE	FALSE	TRUE
pcodonTAGTCC	3971	0.082164	0.00864345	0.009	0.59	0.00643099	0.601033	154	0.322641	0.144727	0.005	0.967	0.00089432	0.950327	1.13411e-06	Monotone	TRUE	TRUE	FALSE	TRUE	TRUE	TRUE	FALSE	FALSE
pcodonTAGTCA	3971	0.0825924	0.00760464	0.004	0.366	0.00145193	0.383653	107	0.314811	0.0612681	0.046	0.326	0.0295185	0.349037	0.0101562	non-significant monotone/non-monotone	TRUE	FALSE	FALSE	FALSE	TRUE	TRUE	FALSE	FALSE
pcodonTAGTCG	3971	0.0876738	0.0108786	0.000483871	0.382645	0.00023131	0.395308	246	0.283926	0.115669	0.000435644	0.918931	7.35116e-06	0.90441	4.47347e-08	non-significant monotone/non-monotone	TRUE	TRUE	FALSE	FALSE	TRUE	TRUE	FALSE	FALSE
pcodonTAGTAT	3971	0.0839941	0.00976336	0.009	0.634	0.00638245	0.663921	225	0.270372	0.158548	0.00217822	1	0.00024325	0.999963	5.73194e-10	Monotone	TRUE	TRUE	FALSE	TRUE	TRUE	TRUE	FALSE	TRUE
pcodonTAGTAC	3971	0.0860513	0.0137814	0.000741935	0.794	0.000287245	0.799598	186	0.279594	0.103059	0.012	0.925	0.00388802	0.904297	7.9119e-06	non-significant monotone/non-monotone	TRUE	TRUE	FALSE	FALSE	TRUE	TRUE	FALSE	FALSE
pcodonTAGTAA	3971	0.0770603	0.00759738	0.182	0.961	0.192206	0.957025	115	0.334295	0.145964	0.004	0.917	0.000988594	0.899021	2.51687e-05	MIC not significant	FALSE	TRUE	FALSE	FALSE	FALSE	TRUE	FALSE	FALSE
pcodonTAGTAG	3971	0.101243	0.0269175	0	0.751337	9.01121e-14	0.755992	285	0.244596	0.0639083	0.001	0.55	0.000349106	0.57455	1.5647e-05	non-significant monotone/non-monotone	TRUE	TRUE	FALSE	FALSE	TRUE	TRUE	FALSE	FALSE
pcodonTAGTGT	3971	0.0890452	0.0191122	0.000451613	0.983839	0.000131893	0.979768	291	0.268875	0.133629	0.000405941	0.999941	1.7933e-05	0.999111	1.25087e-10	Monotone	TRUE	TRUE	FALSE	TRUE	TRUE	TRUE	FALSE	TRUE
pcodonTAGTGC	3971	0.0784099	0.00474282	0.184	0.671	0.177629	0.677132	197	0.267226	0.104617	0.008	0.973	0.00284626	0.958226	3.55025e-06	MIC not significant	FALSE	TRUE	FALSE	FALSE	FALSE	TRUE	FALSE	FALSE
pcodonTAGTGA	3971	0.0822914	0.00693994	0.015	0.464	0.015355	0.47774	203	0.318155	0.166481	0.000237624	0.999188	3.4452e-06	0.995364	1.51708e-09	Monotone	TRUE	TRUE	FALSE	TRUE	TRUE	TRUE	FALSE	TRUE
pcodonTAGTGG	3971	0.0930506	0.0143401	9.67742e-05	0.368839	2.78144e-06	0.379421	360	0.247181	0.129953	0.000326733	1	1.35714e-05	0.999966	1.7305e-12	Monotone	TRUE	TRUE	FALSE	TRUE	TRUE	TRUE	FALSE	TRUE
pcodonTAGCTT	3971	0.0885635	0.00784132	0.001	0.096	0.000305288	0.100379	267	0.240479	0.0609094	0.021	0.772	0.0100049	0.772411	4.56126e-05	non-significant monotone/non-monotone	TRUE	TRUE	FALSE	FALSE	TRUE	TRUE	FALSE	FALSE
pcodonTAGCTC	3971	0.077067	0.00345202	0.15	0.611	0.148872	0.624957	84	0.44502	0.353913	0.000722772	1	8.87189e-06	0.999984	2.41098e-09	MIC not significant	FALSE	TRUE	FALSE	FALSE	FALSE	TRUE	FALSE	FALSE
pcodonTAGCTA	3971	0.0820625	0.00310921	0.006	0.053	0.00175487	0.0391127	86	0.390536	0.0985588	0.009	0.171	0.00141639	0.184989	0.0032445	non-significant monotone/non-monotone	TRUE	TRUE	FALSE	FALSE	TRUE	TRUE	FALSE	FALSE
pcodonTAGCTG	3971	0.0831905	0.00895028	0.007	0.518	0.00293738	0.5303	167	0.417168	0.247798	0	0.960693	5.74462e-16	0.942367	7.68252e-12	Monotone	TRUE	TRUE	FALSE	FALSE	TRUE	TRUE	FALSE	FALSE
pcodonTAGCCT	3971	0.0883351	0.0117226	6.45161e-05	0.222774	2.18141e-06	0.231101	147	0.263146	0.0852761	0.08	0.901	0.0571086	0.895	0.00033209	MIC not significant	TRUE	FALSE	FALSE	FALSE	TRUE	FALSE	FALSE	FALSE
pcodonTAGCCC	3971	0.0809345	0.00836417	0.017	0.802	0.0089569	0.805726	83	0.281933	0.106178	0.378	0.991	0.399812	0.985742	0.00264605	MIC not significant	TRUE	FALSE	FALSE	FALSE	TRUE	FALSE	FALSE	FALSE
pcodonTAGCCA	3971	0.0793379	0.00547997	0.037	0.724	0.0233789	0.740007	56	0.283125	0.03411	0.374	0.477	0.410177	0.538499	0.172561	MIC not significant	FALSE	FALSE	FALSE	FALSE	FALSE	FALSE	FALSE	FALSE
pcodonTAGCCG	3971	0.0822763	0.00624095	0.01	0.264	0.00417418	0.277624	133	0.234029	0.0777596	0.474257	0.998426	0.512466	0.992105	0.00115296	MIC not significant	TRUE	FALSE	FALSE	FALSE	TRUE	FALSE	FALSE	FALSE
pcodonTAGCAT	3971	0.075873	0.00286485	0.384	0.942	0.412021	0.926233	44	0.192741	0.067957	0.914	0.996	0.889672	0.982655	0.0874316	MIC not significant	FALSE	FALSE	FALSE	FALSE	FALSE	FALSE	FALSE	FALSE
pcodonTAGCAG	3971	0.0803921	0.00240286	0.01	0.08	0.00516034	0.0682169	58	0.297905	0.176328	0.222	0.999	0.237361	0.997017	0.00113768	MIC not significant	TRUE	FALSE	FALSE	FALSE	TRUE	FALSE	FALSE	FALSE
pcodonTAGCGT	3971	0.0797138	0.00266631	0.026	0.153	0.0207704	0.141854	95	0.316257	0.0971727	0.034	0.65	0.0251299	0.673433	0.00210426	non-significant monotone/non-monotone	FALSE	TRUE	FALSE	FALSE	TRUE	TRUE	FALSE	FALSE
pcodonTAGCGC	3971	0.078849	0.00442354	0.063	0.564	0.0498081	0.593951	65	0.289106	0.153093	0.431525	0.999673	0.477754	0.997914	0.0012692	MIC not significant	FALSE	FALSE	FALSE	FALSE	FALSE	FALSE	FALSE	FALSE
pcodonTAGCGA	3971	0.0762717	0.00353732	0.264	0.741	0.282084	0.740988	98	0.387787	0.128808	0.00080198	0.181406	1.18388e-05	0.193739	0.000284501	MIC not significant	FALSE	TRUE	FALSE	FALSE	FALSE	TRUE	FALSE	FALSE
pcodonTAGCGG	3971	0.0818996	0.00865991	0.015	0.645	0.00775208	0.6531	136	0.370853	0.161233	0.000168317	0.677743	7.86977e-07	0.698347	1.26629e-06	non-significant monotone/non-monotone	TRUE	TRUE	FALSE	FALSE	TRUE	TRUE	FALSE	FALSE
pcodonTAGATT	3971	0.0930029	0.0113838	0.000483871	0.350355	0.000178337	0.36071	655	0.198534	0.0958516	6.93069e-05	1	1.01693e-06	0.999992	5.12564e-16	Monotone	TRUE	TRUE	FALSE	TRUE	TRUE	TRUE	FALSE	TRUE
pcodonTAGATC	3971	0.0805775	0.00731784	0.203	0.896	0.207737	0.895764	350	0.273173	0.122058	9.52381e-06	0.950648	2.99036e-10	0.935158	1.74616e-11	MIC not significant	FALSE	TRUE	FALSE	FALSE	FALSE	TRUE	FALSE	FALSE
pcodonTAGATA	3971	0.0831403	0.00931368	0.048	0.809	0.0358273	0.813767	304	0.269812	0.165763	0.000178218	1	1.14414e-06	0.999999	1.44424e-13	Monotone	FALSE	TRUE	FALSE	FALSE	FALSE	TRUE	FALSE	FALSE
pcodonTAGATG	3971	0.0945914	0.0176719	6.45161e-05	0.822	1.64037e-05	0.823987	598	0.22245	0.104175	0	0.99997	6.20179e-10	0.999221	5.77806e-16	Monotone	TRUE	TRUE	FALSE	TRUE	TRUE	TRUE	FALSE	TRUE
pcodonTAGACT	3971	0.0827558	0.00662895	0.034	0.535	0.0299265	0.537116	282	0.310909	0.1819	0	0.99995	3.69763e-12	0.999202	6.82792e-14	Monotone	FALSE	TRUE	FALSE	FALSE	FALSE	TRUE	FALSE	FALSE
pcodonTAGACC	3971	0.0772673	0.00014955	0.297	0.287	0.303535	0.290778	216	0.303991	0.222693	0.000178218	1	2.1485e-06	1	2.23378e-13	MIC not significant	FALSE	TRUE	FALSE	FALSE	FALSE	TRUE	FALSE	FALSE
pcodonTAGACA	3971	0.0762431	0.00235807	0.255	0.558	0.278276	0.586943	94	0.295049	0.087714	0.097	0.782	0.0932608	0.769653	0.00375152	MIC not significant	FALSE	FALSE	FALSE	FALSE	FALSE	FALSE	FALSE	FALSE
pcodonTAGACG	3971	0.0760566	0.000318059	0.582	0.596	0.602214	0.610706	292	0.301872	0.17218	0	0.99999	1.00916e-09	0.999702	1.40018e-13	MIC not significant	FALSE	TRUE	FALSE	FALSE	FALSE	TRUE	FALSE	FALSE
pcodonTAGAAT	3971	0.0846468	0.0108417	0.009	0.688	0.00351783	0.698301	226	0.32118	0.182789	0	0.999465	1.01548e-09	0.996524	1.85592e-11	Monotone	TRUE	TRUE	FALSE	TRUE	TRUE	TRUE	FALSE	TRUE
pcodonTAGAAC	3971	0.0759528	0.00665567	0.397	0.969	0.401012	0.961611	190	0.331306	0.212749	0.000118812	1	1.3057e-07	0.99992	2.12286e-11	MIC not significant	FALSE	TRUE	FALSE	FALSE	FALSE	TRUE	FALSE	FALSE
pcodonTAGAAA	3971	0.0769731	0.00244557	0.183	0.444	0.194675	0.4708	120	0.300165	0.115402	0.022	0.889	0.0122043	0.877337	0.000147113	MIC not significant	FALSE	TRUE	FALSE	FALSE	FALSE	TRUE	FALSE	FALSE
pcodonTAGAAG	3971	0.0791202	0.00350614	0.444	0.777	0.447047	0.792221	399	0.310267	0.155524	0	0.915782	8.94498e-21	0.90389	2.68067e-16	MIC not significant	FALSE	TRUE	FALSE	FALSE	FALSE	TRUE	FALSE	FALSE
pcodonTAGAGT	3971	0.0894347	0.00759631	9.90099e-06	0.0206931	4.01757e-06	0.0154551	192	0.315489	0.253171	0.000178218	1	2.02641e-06	1	1.02296e-13	Monotone	TRUE	TRUE	FALSE	TRUE	TRUE	TRUE	FALSE	TRUE
pcodonTAGAGC	3971	0.0780723	0.00223168	0.198	0.393	0.194299	0.39674	189	0.326031	0.142654	0.000207921	0.835158	5.20262e-07	0.831603	8.42428e-08	MIC not significant	FALSE	TRUE	FALSE	FALSE	FALSE	TRUE	FALSE	FALSE
pcodonTAGAGA	3971	0.0766971	0.00284109	0.222	0.553	0.240368	0.572221	146	0.329155	0.111882	0.000930693	0.375129	2.42234e-05	0.410013	3.68504e-05	MIC not significant	FALSE	TRUE	FALSE	FALSE	FALSE	TRUE	FALSE	FALSE
pcodonTAGAGG	3971	0.0790194	0.00607288	0.311	0.903	0.300205	0.892365	314	0.289433	0.137681	0	0.969851	9.86254e-11	0.95526	1.09903e-11	MIC not significant	FALSE	TRUE	FALSE	FALSE	FALSE	TRUE	FALSE	FALSE
pcodonTAGGTC	3971	0.0806868	0.00666004	0.031	0.539	0.0246634	0.556181	150	0.303697	0.0982891	0.013	0.794	0.00614751	0.792608	9.36256e-05	non-significant monotone/non-monotone	FALSE	TRUE	FALSE	FALSE	FALSE	TRUE	FALSE	FALSE
pcodonTAGGTG	3971	0.0768208	0.00750404	0.398	0.978	0.405992	0.974283	228	0.255729	0.0734854	0.006	0.666	0.00183167	0.686514	3.34375e-05	MIC not significant	FALSE	TRUE	FALSE	FALSE	FALSE	TRUE	FALSE	FALSE
pcodonTAGGCT	3971	0.0986004	0.0234695	0	0.737891	1.29022e-10	0.74222	330	0.261447	0.080335	0.000168317	0.522614	2.56311e-06	0.552184	1.6313e-07	non-significant monotone/non-monotone	TRUE	TRUE	FALSE	FALSE	TRUE	TRUE	FALSE	FALSE
pcodonTAGGCC	3971	0.0845403	0.0140215	0.004	0.937	0.00151739	0.929727	195	0.260012	0.12028	0.0187327	0.999515	0.00894314	0.996599	6.80343e-07	Monotone	TRUE	TRUE	FALSE	TRUE	TRUE	TRUE	FALSE	TRUE
pcodonTAGGCA	3971	0.083885	0.0122585	0.002	0.845	0.000404404	0.838742	130	0.365047	0.238498	0.000821782	0.99999	1.88864e-05	0.999772	3.76364e-09	Monotone	TRUE	TRUE	FALSE	TRUE	TRUE	TRUE	FALSE	TRUE
pcodonTAGGCG	3971	0.092328	0.0161018	3.22581e-05	0.642581	6.54524e-06	0.650093	346	0.265624	0.113918	2.9703e-05	0.960683	2.7777e-08	0.944717	1.15166e-10	Monotone	TRUE	TRUE	FALSE	FALSE	TRUE	TRUE	FALSE	FALSE
pcodonTAGGAC	3971	0.0764422	0.00461526	0.289	0.936	0.299708	0.923096	64	0.358748	0.00553279	0.096	0.062	0.0794816	0.0441175	0.559124	MIC not significant	FALSE	FALSE	FALSE	FALSE	FALSE	FALSE	FALSE	FALSE
pcodonTAGGAA	3971	0.0768833	0.00221112	0.206	0.463	0.212224	0.458765	120	0.344718	0.132673	0.001	0.635	0.000104642	0.657246	4.31883e-05	MIC not significant	FALSE	TRUE	FALSE	FALSE	FALSE	TRUE	FALSE	FALSE
pcodonTAGGAG	3971	0.075664	0.00479186	0.31	0.895	0.335941	0.887033	118	0.248499	0.153794	0.291683	1	0.321163	0.999986	1.1235e-05	MIC not significant	FALSE	FALSE	FALSE	FALSE	FALSE	FALSE	FALSE	FALSE
pcodonTAGGGT	3971	0.0867465	0.00884121	0.004	0.448	0.00335518	0.45272	342	0.257553	0.118624	6.93069e-05	0.998099	6.09678e-07	0.992466	5.85144e-11	Monotone	TRUE	TRUE	FALSE	TRUE	TRUE	TRUE	FALSE	TRUE
pcodonTAGGGC	3971	0.0825038	0.00423639	0.043	0.26	0.0351988	0.278283	273	0.253571	0.08638	0.006	0.91	0.000667309	0.891974	7.67603e-07	non-significant monotone/non-monotone	FALSE	TRUE	FALSE	FALSE	FALSE	TRUE	FALSE	FALSE
pcodonTAGGGA	3971	0.0851311	0.00969605	0.014	0.718	0.0109265	0.728801	338	0.318115	0.153769	0	0.833733	1.43307e-17	0.830064	7.18373e-14	non-significant monotone/non-monotone	TRUE	TRUE	FALSE	FALSE	TRUE	TRUE	FALSE	FALSE
pcodonTAGGGG	3971	0.0952346	0.0206929	0	0.81496	8.81721e-08	0.815909	349	0.251422	0.123916	0.000128713	0.99995	1.24292e-06	0.998957	1.283e-11	Monotone	TRUE	TRUE	FALSE	TRUE	TRUE	TRUE	FALSE	TRUE
pcodonTGTTTT	3971	0.112507	0.0261218	0	0.0416535	6.88505e-21	0.0375774	619	0.226166	0.138837	0	1	1.15439e-12	1	8.03583e-22	Monotone	TRUE	TRUE	FALSE	TRUE	TRUE	TRUE	FALSE	TRUE
pcodonTGTTTC	3971	0.0941874	0.0206824	9.80392e-06	0.932255	2.49568e-06	0.926427	427	0.214537	0.120099	0.00156436	1	0.000207121	1	1.7091e-13	Monotone	TRUE	TRUE	FALSE	TRUE	TRUE	TRUE	FALSE	TRUE
pcodonTGTTTA	3971	0.0973248	0.0211488	0	0.793822	6.76785e-08	0.796943	485	0.222317	0.111308	0.000128713	1	1.66581e-06	0.99997	4.49861e-14	Monotone	TRUE	TRUE	FALSE	TRUE	TRUE	TRUE	FALSE	TRUE
pcodonTGTTTG	3971	0.10828	0.0367138	0	0.996069	2.03309e-16	0.993668	597	0.233794	0.0795089	0	0.457861	1.02535e-12	0.484097	2.24941e-12	non-significant monotone/non-monotone	TRUE	TRUE	FALSE	FALSE	TRUE	TRUE	FALSE	FALSE
pcodonTGTTCT	3971	0.0923617	0.0211243	3.22581e-05	0.975194	6.0147e-06	0.969256	343	0.251755	0.108711	0.00019802	0.99403	3.32857e-06	0.985305	3.84959e-10	Monotone	TRUE	TRUE	FALSE	TRUE	TRUE	TRUE	FALSE	TRUE
pcodonTGTTCC	3971	0.0822997	0.00964461	0.009	0.734	0.00592988	0.738437	153	0.35149	0.0583491	0.002	0.018	8.47565e-06	0.00803726	0.00262931	Non-monotone	TRUE	TRUE	FALSE	FALSE	TRUE	TRUE	FALSE	FALSE
pcodonTGTTCA	3971	0.0840393	0.0110692	0.005	0.716	0.00249956	0.732413	188	0.320267	0.161909	0.000247525	0.992842	2.57665e-06	0.981953	1.03944e-08	Monotone	TRUE	TRUE	FALSE	TRUE	TRUE	TRUE	FALSE	TRUE
pcodonTGTTCG	3971	0.0871411	0.0142207	0.004	0.898	0.001986	0.882744	305	0.236098	0.0684622	0.007	0.858	0.00267444	0.842206	3.62594e-06	non-significant monotone/non-monotone	TRUE	TRUE	FALSE	FALSE	TRUE	TRUE	FALSE	FALSE
pcodonTGTTAT	3971	0.0892526	0.0111732	0.00125806	0.420065	0.000291272	0.429503	342	0.214584	0.0886679	0.0273069	0.99997	0.0168944	0.999449	1.97169e-08	Monotone	TRUE	TRUE	FALSE	TRUE	TRUE	TRUE	FALSE	TRUE
pcodonTGTTAC	3971	0.0943389	0.0144288	0	0.0566337	3.51806e-10	0.0507517	180	0.260937	0.0823651	0.064	0.947	0.0510388	0.93189	9.38038e-05	MIC not significant	TRUE	FALSE	FALSE	FALSE	TRUE	FALSE	FALSE	FALSE
pcodonTGTTAA	3971	0.0864029	0.0144046	0.002	0.831	0.000201636	0.824711	189	0.29667	0.0891475	0.00220792	0.462228	0.000173763	0.496132	3.00488e-05	non-significant monotone/non-monotone	TRUE	TRUE	FALSE	FALSE	TRUE	TRUE	FALSE	FALSE
pcodonTGTTAG	3971	0.0915428	0.0161818	0	0.557723	1.39913e-06	0.57153	247	0.278564	0.104595	0.000554455	0.847861	1.92772e-05	0.842921	2.0212e-07	non-significant monotone/non-monotone	TRUE	TRUE	FALSE	FALSE	TRUE	TRUE	FALSE	FALSE
pcodonTGTTGT	3971	0.107631	0.0389951	0	0.998772	5.72748e-19	0.997175	376	0.248287	0.0865465	5.94059e-05	0.77898	7.07178e-07	0.783657	6.07456e-09	non-significant monotone/non-monotone	TRUE	TRUE	FALSE	FALSE	TRUE	TRUE	FALSE	FALSE
pcodonTGTTGC	3971	0.0827953	0.00655111	0.018	0.465	0.0192517	0.447061	234	0.292841	0.131728	0.000465347	0.988703	1.23652e-05	0.976609	1.07513e-08	Monotone	TRUE	TRUE	FALSE	TRUE	TRUE	TRUE	FALSE	TRUE
pcodonTGTTGA	3971	0.0908891	0.0116431	0.001	0.346	7.54024e-05	0.353572	376	0.284735	0.126369	0	0.850238	1.71003e-13	0.844874	1.21654e-12	non-significant monotone/non-monotone	TRUE	TRUE	FALSE	FALSE	TRUE	TRUE	FALSE	FALSE
pcodonTGTTGG	3971	0.101242	0.0229575	0	0.485723	9.45091e-12	0.497159	414	0.265147	0.0928085	0	0.371287	1.00762e-11	0.397635	2.43618e-10	non-significant monotone/non-monotone	TRUE	TRUE	FALSE	FALSE	TRUE	TRUE	FALSE	FALSE
pcodonTGTCTT	3971	0.0964761	0.0212404	0	0.738	7.81094e-09	0.744428	340	0.258477	0.0921659	7.92079e-05	0.778653	7.77373e-07	0.782801	1.11221e-08	non-significant monotone/non-monotone	TRUE	TRUE	FALSE	FALSE	TRUE	TRUE	FALSE	FALSE
pcodonTGTCTC	3971	0.0828815	0.00689202	0.001	0.261	0.00109236	0.269273	109	0.330555	0.134089	0.013	0.923	0.00895881	0.906769	9.00732e-05	non-significant monotone/non-monotone	TRUE	TRUE	FALSE	FALSE	TRUE	TRUE	FALSE	FALSE
pcodonTGTCTA	3971	0.0872488	0.0141034	0.001	0.7	7.06734e-05	0.717397	194	0.381569	0.204855	0	0.886287	1.54371e-14	0.873833	3.45573e-11	non-significant monotone/non-monotone	TRUE	TRUE	FALSE	FALSE	TRUE	TRUE	FALSE	FALSE
pcodonTGTCTG	3971	0.0781898	0.00947645	0.179	0.984	0.187311	0.981465	207	0.286433	0.144802	0.00353465	0.999901	0.000505855	0.998478	1.55005e-08	MIC not significant	FALSE	TRUE	FALSE	FALSE	FALSE	TRUE	FALSE	FALSE
pcodonTGTCCT	3971	0.0917857	0.0168231	6.45161e-05	0.741677	8.78792e-06	0.746936	323	0.233014	0.0740592	0.011	0.964	0.00603669	0.948938	6.8349e-07	Monotone	TRUE	TRUE	FALSE	FALSE	TRUE	TRUE	FALSE	FALSE
pcodonTGTCCC	3971	0.0803154	0.00704045	0.023	0.641	0.0181532	0.642611	121	0.288816	0.15784	0.0399604	0.999772	0.0264498	0.99835	6.42246e-06	Monotone	FALSE	FALSE	FALSE	FALSE	TRUE	TRUE	FALSE	TRUE
pcodonTGTCCA	3971	0.08719	0.0165465	0.002	0.916	0.000162285	0.922288	203	0.294735	0.122539	0.001	0.977	0.000229886	0.963627	3.06108e-07	Monotone	TRUE	TRUE	FALSE	TRUE	TRUE	TRUE	FALSE	FALSE
pcodonTGTCCG	3971	0.091945	0.0195656	9.90099e-06	0.885802	1.46226e-06	0.882334	265	0.211015	0.0866135	0.241436	1	0.259397	0.999898	1.07894e-06	MIC not significant	TRUE	FALSE	FALSE	FALSE	TRUE	FALSE	FALSE	FALSE
pcodonTGTCAT	3971	0.081378	0.00954376	0.008	0.869	0.00401716	0.86719	87	0.342594	0.142108	0.03	0.928	0.0199716	0.913719	0.000319394	non-significant monotone/non-monotone	TRUE	TRUE	FALSE	FALSE	TRUE	TRUE	FALSE	FALSE
pcodonTGTCAC	3971	0.0769663	0.00495865	0.185	0.994	0.189607	0.982118	45	0.292029	0.168608	0.236	0.995	0.276032	0.98004	0.0050827	MIC not significant	FALSE	FALSE	FALSE	FALSE	FALSE	FALSE	FALSE	FALSE
pcodonTGTCAA	3971	0.0767871	0.00702218	0.224	1	0.244947	0.99433	60	0.284049	0.123511	0.245	0.98	0.272302	0.955184	0.00589778	MIC not significant	FALSE	FALSE	FALSE	FALSE	FALSE	FALSE	FALSE	FALSE
pcodonTGTCAG	3971	0.0818698	0.00828033	0.004	0.639	0.0016634	0.655686	79	0.295326	0.163684	0.116475	0.999198	0.114364	0.995247	0.000217223	MIC not significant	TRUE	FALSE	FALSE	FALSE	TRUE	FALSE	FALSE	FALSE
pcodonTGTCGT	3971	0.0963585	0.0178227	0	0.195079	2.30162e-10	0.197773	236	0.229096	0.0730187	0.11	0.997	0.107756	0.984585	2.5799e-05	MIC not significant	TRUE	FALSE	FALSE	FALSE	TRUE	FALSE	FALSE	FALSE
pcodonTGTCGC	3971	0.0770694	0.00530156	0.174	0.899	0.176577	0.890177	80	0.348996	0.152087	0.016	0.807	0.00461982	0.800642	0.000349009	MIC not significant	FALSE	TRUE	FALSE	FALSE	FALSE	TRUE	FALSE	FALSE
pcodonTGTCGA	3971	0.0902002	0.0128931	3.9604e-05	0.295861	5.51327e-06	0.303494	229	0.313984	0.107175	0.000118812	0.436743	3.64896e-07	0.46674	4.03481e-07	non-significant monotone/non-monotone	TRUE	TRUE	FALSE	FALSE	TRUE	TRUE	FALSE	FALSE
pcodonTGTCGG	3971	0.0907095	0.0155716	1.9802e-05	0.524099	1.76598e-06	0.537087	218	0.305677	0.167906	0.000217822	0.999832	9.63625e-07	0.998178	3.09673e-10	Monotone	TRUE	TRUE	FALSE	TRUE	TRUE	TRUE	FALSE	TRUE
pcodonTGTATT	3971	0.116143	0.033161	0	0.20199	1.00887e-25	0.204902	605	0.229106	0.0924341	0	0.92601	2.29001e-12	0.913447	2.09975e-14	non-significant monotone/non-monotone	TRUE	TRUE	FALSE	FALSE	TRUE	TRUE	FALSE	FALSE
pcodonTGTATC	3971	0.0984843	0.0207996	0	0.401752	7.74721e-11	0.412588	307	0.246262	0.112983	0.00208911	0.999861	0.00026197	0.99844	1.52086e-09	Monotone	TRUE	TRUE	FALSE	TRUE	TRUE	TRUE	FALSE	TRUE
pcodonTGTATA	3971	0.0995363	0.0184337	0	0.118139	1.31416e-11	0.116021	320	0.325083	0.212959	0	1	7.79983e-19	0.999965	2.78594e-18	Monotone	TRUE	TRUE	FALSE	TRUE	TRUE	TRUE	FALSE	TRUE
pcodonTGTATG	3971	0.108008	0.0285746	0	0.551117	2.83191e-16	0.559828	581	0.20703	0.0942696	0.000118812	1	7.2547e-07	0.999726	3.78017e-14	Monotone	TRUE	TRUE	FALSE	TRUE	TRUE	TRUE	FALSE	TRUE
pcodonTGTACT	3971	0.0899602	0.0153605	6.45161e-05	0.675065	2.167e-05	0.685273	260	0.294341	0.211987	0.000168317	1	8.19152e-07	1	4.77946e-15	Monotone	TRUE	TRUE	FALSE	TRUE	TRUE	TRUE	FALSE	TRUE
pcodonTGTACC	3971	0.0758461	0.00599119	0.393	0.944	0.391248	0.942733	177	0.317849	0.142763	0.002	0.972	5.54739e-05	0.956619	2.16356e-07	MIC not significant	FALSE	TRUE	FALSE	FALSE	FALSE	TRUE	FALSE	FALSE
pcodonTGTACA	3971	0.0783613	0.00471688	0.099	0.601	0.094263	0.610237	119	0.283186	0.0510543	0.068	0.369	0.0562813	0.413349	0.0134785	MIC not significant	FALSE	FALSE	FALSE	FALSE	FALSE	FALSE	FALSE	FALSE
pcodonTGTACG	3971	0.0819483	0.00553982	0.041	0.388	0.0296054	0.389586	212	0.304028	0.155878	0.001	0.999	4.85792e-06	0.995167	2.5468e-09	Monotone	FALSE	TRUE	FALSE	FALSE	FALSE	TRUE	FALSE	FALSE
pcodonTGTAAT	3971	0.0828312	0.00507881	0.009	0.161	0.0039223	0.151667	158	0.312336	0.151212	0.002	0.995	0.000521334	0.983754	4.43561e-07	Monotone	TRUE	TRUE	FALSE	TRUE	TRUE	TRUE	FALSE	TRUE
pcodonTGTAAC	3971	0.0764445	0.00589151	0.227	0.895	0.247467	0.892779	140	0.383175	0.208457	5.94059e-05	0.962347	1.83018e-08	0.941951	1.43006e-08	MIC not significant	FALSE	TRUE	FALSE	FALSE	FALSE	TRUE	FALSE	FALSE
pcodonTGTAAA	3971	0.0799467	0.00395928	0.035	0.262	0.0236508	0.274831	94	0.383414	0.2704	0.00185149	0.99995	8.94195e-05	0.999661	7.81748e-08	Monotone	FALSE	TRUE	FALSE	FALSE	FALSE	TRUE	FALSE	FALSE
pcodonTGTAAG	3971	0.0713187	0.00259145	0.914	0.983	0.906517	0.979059	218	0.297957	0.147652	0.001	0.996	4.72279e-06	0.987843	4.41948e-09	MIC not significant	FALSE	TRUE	FALSE	FALSE	FALSE	TRUE	FALSE	FALSE
pcodonTGTAGT	3971	0.0853572	0.00903685	0.002	0.34	0.000848311	0.341871	203	0.267907	0.0458059	0.02	0.288	0.0101009	0.310197	0.00216844	non-significant monotone/non-monotone	TRUE	TRUE	FALSE	FALSE	TRUE	TRUE	FALSE	FALSE
pcodonTGTAGC	3971	0.0832105	0.00506761	0.004	0.095	0.00119854	0.0890038	134	0.277285	0.0873415	0.084	0.91	0.072106	0.893726	0.000526699	MIC not significant	TRUE	FALSE	FALSE	FALSE	TRUE	FALSE	FALSE	FALSE
pcodonTGTAGA	3971	0.0898743	0.00658579	3.22581e-05	0.00890323	3.76345e-06	0.00609223	208	0.306968	0.166409	0.000455446	0.999822	7.75993e-06	0.998391	9.59744e-10	Monotone	TRUE	TRUE	FALSE	TRUE	TRUE	TRUE	FALSE	TRUE
pcodonTGTAGG	3971	0.0849271	0.0112232	0.006	0.775	0.00476111	0.777319	257	0.281665	0.162036	6.93069e-05	0.99997	1.03879e-06	0.999818	1.9786e-11	Monotone	TRUE	TRUE	FALSE	TRUE	TRUE	TRUE	FALSE	TRUE
pcodonTGTGTC	3971	0.0879114	0.00957038	0.00119355	0.300516	0.000430284	0.3093	289	0.294047	0.17402	0	0.99998	2.34103e-10	0.999782	1.35072e-13	Monotone	TRUE	TRUE	FALSE	TRUE	TRUE	TRUE	FALSE	TRUE
pcodonTGTGTG	3971	0.0875595	0.0179998	0.007	0.997	0.0026407	0.994237	396	0.212394	0.111436	0.0151782	1	0.00760273	1	9.19939e-12	Monotone	TRUE	TRUE	FALSE	TRUE	TRUE	TRUE	FALSE	TRUE
pcodonTGTGCT	3971	0.104382	0.0288222	0	0.823347	5.3533e-14	0.823251	457	0.247795	0.121578	0	0.999604	1.22768e-10	0.997422	1.64505e-14	Monotone	TRUE	TRUE	FALSE	TRUE	TRUE	TRUE	FALSE	TRUE
pcodonTGTGCC	3971	0.0898778	0.0173864	0.000129032	0.893161	3.7623e-05	0.891275	279	0.252772	0.0800569	0.003	0.785	0.000367837	0.784386	1.5601e-06	non-significant monotone/non-monotone	TRUE	TRUE	FALSE	FALSE	TRUE	TRUE	FALSE	FALSE
pcodonTGTGCA	3971	0.0922926	0.0172855	0	0.524168	8.79612e-08	0.537187	210	0.299439	0.0992082	0.000673267	0.563436	2.44479e-05	0.590798	3.22075e-06	non-significant monotone/non-monotone	TRUE	TRUE	FALSE	FALSE	TRUE	TRUE	FALSE	FALSE
pcodonTGTGCG	3971	0.0974781	0.0275597	0	0.99602	6.91079e-09	0.993043	403	0.227078	0.0370109	0.004	0.113	0.00018814	0.115852	0.000101736	non-significant monotone/non-monotone	TRUE	TRUE	FALSE	FALSE	TRUE	TRUE	FALSE	FALSE
pcodonTGTGAC	3971	0.0815266	0.00950559	0.011	0.803	0.00671543	0.81255	111	0.335087	0.150947	0.011	0.959	0.00399077	0.939518	2.51187e-05	Monotone	TRUE	TRUE	FALSE	FALSE	TRUE	TRUE	FALSE	FALSE
pcodonTGTGAA	3971	0.0843929	0.0102671	0.009	0.682	0.00616926	0.687175	226	0.329561	0.169708	1.9802e-05	0.968119	7.42776e-11	0.951191	1.1387e-10	Monotone	TRUE	TRUE	FALSE	TRUE	TRUE	TRUE	FALSE	FALSE
pcodonTGTGAG	3971	0.0871015	0.00999256	0.001	0.193	3.82264e-05	0.204962	157	0.265643	0.106339	0.075	0.997	0.0689444	0.989257	3.07499e-05	MIC not significant	TRUE	FALSE	FALSE	FALSE	TRUE	FALSE	FALSE	FALSE
pcodonTGTGGT	3971	0.104389	0.0265084	0	0.580735	4.26432e-14	0.590689	449	0.228218	0.0820672	0.000108911	0.939743	2.27704e-06	0.926124	6.27303e-10	non-significant monotone/non-monotone	TRUE	TRUE	FALSE	FALSE	TRUE	TRUE	FALSE	FALSE
pcodonTGTGGC	3971	0.0883829	0.0128985	0.002	0.694	0.000702242	0.706123	332	0.296241	0.140402	0	0.965733	6.36596e-12	0.950266	1.65869e-12	Monotone	TRUE	TRUE	FALSE	FALSE	TRUE	TRUE	FALSE	FALSE
pcodonTGTGGA	3971	0.091065	0.00864753	0.000548387	0.123032	0.000144529	0.119783	427	0.238873	0.119981	3.9604e-05	0.99998	5.20242e-08	0.999523	1.75904e-13	Monotone	TRUE	TRUE	FALSE	TRUE	TRUE	TRUE	FALSE	TRUE
pcodonTGTGGG	3971	0.101792	0.0246454	0	0.694634	2.68934e-11	0.701276	479	0.209204	0.0766921	0.001	0.999	0.000252746	0.992784	6.99715e-10	Monotone	TRUE	TRUE	FALSE	TRUE	TRUE	TRUE	FALSE	TRUE
pcodonTGCTTT	3971	0.0846309	0.00424552	0.202	0.596	0.196101	0.624985	837	0.210626	0.120356	0	1	2.99753e-16	1	4.41667e-25	MIC not significant	FALSE	TRUE	FALSE	FALSE	FALSE	TRUE	FALSE	FALSE
pcodonTGCTTC	3971	0.0793208	0.000874966	0.553	0.632	0.56697	0.641587	545	0.222641	0.133644	0	1	2.77922e-09	1	1.12437e-18	MIC not significant	FALSE	TRUE	FALSE	FALSE	FALSE	TRUE	FALSE	FALSE
pcodonTGCTTA	3971	0.0840291	0.000348315	0.148	0.154	0.169828	0.17563	707	0.248757	0.132495	0	0.999267	6.25309e-26	0.996316	1.42427e-23	MIC not significant	FALSE	TRUE	FALSE	FALSE	FALSE	TRUE	FALSE	FALSE
pcodonTGCTTG	3971	0.0940125	0.0132888	0.000193548	0.471806	6.20398e-05	0.482441	679	0.207185	0.0978504	0	1	1.1886e-08	0.999899	7.03539e-17	Monotone	TRUE	TRUE	FALSE	TRUE	TRUE	TRUE	FALSE	TRUE
pcodonTGCTCT	3971	0.0804229	0.00675045	0.196	0.874	0.201091	0.868718	332	0.240593	0.116476	0.00217822	0.99999	0.000365749	0.999815	1.68195e-10	MIC not significant	FALSE	TRUE	FALSE	FALSE	FALSE	TRUE	FALSE	FALSE
pcodonTGCTCC	3971	0.0749973	6.02399e-05	0.693	0.677	0.691355	0.671182	273	0.27752	0.123991	0.000207921	0.987337	2.70663e-06	0.973924	2.17593e-09	MIC not significant	FALSE	TRUE	FALSE	FALSE	FALSE	TRUE	FALSE	FALSE
pcodonTGCTCA	3971	0.0809473	0.00303151	0.021	0.113	0.0137164	0.107215	119	0.323871	0.212079	0.00777228	0.99999	0.00176862	0.999855	1.36542e-07	Monotone	FALSE	TRUE	FALSE	FALSE	TRUE	TRUE	FALSE	TRUE
pcodonTGCTCG	3971	0.0770907	1.28814e-07	0.632	0.614	0.643654	0.61456	393	0.23032	0.137284	0.00155446	1	0.000181618	1	3.10622e-14	MIC not significant	FALSE	TRUE	FALSE	FALSE	FALSE	TRUE	FALSE	FALSE
pcodonTGCTAT	3971	0.0768708	0.00053635	0.64	0.668	0.643788	0.675016	387	0.263268	0.17212	0	1	1.45338e-10	1	1.56508e-17	MIC not significant	FALSE	TRUE	FALSE	FALSE	FALSE	TRUE	FALSE	FALSE
pcodonTGCTAC	3971	0.0742491	0.00393258	0.607	0.943	0.615295	0.924548	190	0.302527	0.182961	0.000960396	1	4.78838e-05	0.999907	7.48641e-10	MIC not significant	FALSE	TRUE	FALSE	FALSE	FALSE	TRUE	FALSE	FALSE
pcodonTGCTAA	3971	0.0765349	0.00178449	0.279	0.472	0.306286	0.494751	160	0.406171	0.262687	0	0.999782	1.59084e-12	0.997355	4.25991e-12	MIC not significant	FALSE	TRUE	FALSE	FALSE	FALSE	TRUE	FALSE	FALSE
pcodonTGCTAG	3971	0.0822308	0.00263951	0.044	0.148	0.0384902	0.154278	265	0.316743	0.159026	0	0.986891	2.6916e-10	0.973611	1.55407e-11	Monotone	FALSE	TRUE	FALSE	FALSE	FALSE	TRUE	FALSE	FALSE
pcodonTGCTGT	3971	0.0863106	0.00788757	0.003	0.338	0.00277043	0.326906	316	0.218428	0.0864806	0.0253762	0.999762	0.0150793	0.997933	1.00899e-07	Monotone	TRUE	TRUE	FALSE	TRUE	TRUE	TRUE	FALSE	TRUE
pcodonTGCTGC	3971	0.0757627	0.000446651	0.751	0.767	0.761821	0.780669	385	0.283173	0.172258	0	1	1.8023e-14	0.999972	1.83503e-17	MIC not significant	FALSE	TRUE	FALSE	FALSE	FALSE	TRUE	FALSE	FALSE
pcodonTGCTGA	3971	0.0786444	0.000688965	0.396	0.457	0.416806	0.468889	370	0.273038	0.155316	0	1	1.87352e-10	0.999941	3.37836e-15	MIC not significant	FALSE	TRUE	FALSE	FALSE	FALSE	TRUE	FALSE	FALSE
pcodonTGCTGG	3971	0.0819514	0.000989486	0.273	0.346	0.273403	0.347106	538	0.264011	0.162513	0	1	4.22581e-20	0.999997	1.93116e-22	MIC not significant	FALSE	TRUE	FALSE	FALSE	FALSE	TRUE	FALSE	FALSE
pcodonTGCCTT	3971	0.0791087	2.1806e-06	0.326	0.292	0.335819	0.308616	363	0.30235	0.151605	0	0.97404	1.47454e-15	0.959219	1.37408e-14	MIC not significant	FALSE	TRUE	FALSE	FALSE	FALSE	TRUE	FALSE	FALSE
pcodonTGCCTC	3971	0.0766258	0.000538315	0.224	0.241	0.220282	0.253214	115	0.349637	0.106782	0.003	0.306	0.00042776	0.348498	0.00036475	MIC not significant	FALSE	TRUE	FALSE	FALSE	FALSE	TRUE	FALSE	FALSE
pcodonTGCCTA	3971	0.0785992	0.00422113	0.106	0.495	0.100862	0.519885	159	0.335052	0.177345	0.00070297	0.997267	1.38904e-05	0.98885	3.24806e-08	MIC not significant	FALSE	TRUE	FALSE	FALSE	FALSE	TRUE	FALSE	FALSE
pcodonTGCCTG	3971	0.0799069	0.00234896	0.097	0.245	0.0915665	0.244197	206	0.334373	0.166169	9.90099e-06	0.979871	3.41319e-08	0.964203	1.19201e-09	MIC not significant	FALSE	TRUE	FALSE	FALSE	FALSE	TRUE	FALSE	FALSE
pcodonTGCCCT	3971	0.0717053	3.54349e-05	0.948	0.94	0.945639	0.938117	285	0.219753	0.115056	0.0426931	1	0.0310193	0.999996	4.19556e-09	MIC not significant	FALSE	FALSE	FALSE	FALSE	FALSE	TRUE	FALSE	FALSE
pcodonTGCCCC	3971	0.0771208	0.00371567	0.163	0.612	0.158937	0.632179	101	0.26583	0.0763053	0.172	0.854	0.181117	0.844001	0.00517091	MIC not significant	FALSE	FALSE	FALSE	FALSE	FALSE	FALSE	FALSE	FALSE
pcodonTGCCCA	3971	0.0785873	0.00663245	0.065	0.851	0.0575477	0.845016	85	0.381851	0.232879	0.00947525	0.999475	0.00232464	0.99654	2.91012e-06	MIC not significant	FALSE	TRUE	FALSE	FALSE	FALSE	TRUE	FALSE	FALSE
pcodonTGCCCG	3971	0.0759494	0.0048331	0.392	0.887	0.40576	0.878805	194	0.285541	0.0379003	0.001	0.038	0.000311292	0.0232602	0.00652564	MIC not significant	FALSE	TRUE	FALSE	FALSE	FALSE	TRUE	FALSE	FALSE
pcodonTGCCAT	3971	0.0749167	0.0026352	0.634	0.994	0.661228	0.980472	42	0.342292	0.0155934	0.125	0.089	0.106004	0.0715442	0.430731	MIC not significant	FALSE	FALSE	FALSE	FALSE	FALSE	FALSE	FALSE	FALSE
pcodonTGCCAC	3971	0.0765898	0.000736636	0.238	0.32	0.22161	0.335114	42	0.297285	0.108711	0.272	0.862	0.326364	0.837737	0.0334946	MIC not significant	FALSE	FALSE	FALSE	FALSE	FALSE	FALSE	FALSE	FALSE
pcodonTGCCAG	3971	0.0767761	0.000112141	0.206	0.188	0.213847	0.193194	83	0.343454	0.119403	0.059	0.838	0.050778	0.83261	0.0013766	MIC not significant	FALSE	FALSE	FALSE	FALSE	FALSE	FALSE	FALSE	FALSE
pcodonTGCCGT	3971	0.0741839	0.00115647	0.609	0.712	0.622831	0.731252	189	0.255248	0.102646	0.048	0.998	0.0341981	0.988412	6.97777e-06	MIC not significant	FALSE	FALSE	FALSE	FALSE	FALSE	TRUE	FALSE	FALSE
pcodonTGCCGC	3971	0.0725417	0.00482473	0.775	0.998	0.783911	0.995227	91	0.434983	0.222472	0.000148515	0.78701	7.40406e-07	0.787994	2.36547e-06	MIC not significant	FALSE	TRUE	FALSE	FALSE	FALSE	TRUE	FALSE	FALSE
pcodonTGCCGA	3971	0.0812451	0.00600024	0.031	0.415	0.0194206	0.429467	177	0.29684	0.0636569	0.006	0.234	0.00137561	0.249478	0.000704371	non-significant monotone/non-monotone	FALSE	TRUE	FALSE	FALSE	TRUE	TRUE	FALSE	FALSE
pcodonTGCCGG	3971	0.081659	0.00513681	0.022	0.297	0.0197381	0.30296	170	0.244546	0.103427	0.105376	0.999436	0.100809	0.996259	1.89946e-05	MIC not significant	FALSE	FALSE	FALSE	FALSE	TRUE	FALSE	FALSE	FALSE
pcodonTGCATT	3971	0.0788499	0.000827556	0.638	0.699	0.649937	0.710341	583	0.227903	0.111974	0	0.999931	6.63409e-12	0.999038	1.01624e-16	MIC not significant	FALSE	TRUE	FALSE	FALSE	FALSE	TRUE	FALSE	FALSE
pcodonTGCATC	3971	0.0785596	0.00105743	0.356	0.446	0.37389	0.467711	320	0.284145	0.133494	0	0.963416	1.36901e-10	0.947683	1.53082e-11	MIC not significant	FALSE	TRUE	FALSE	FALSE	FALSE	TRUE	FALSE	FALSE
pcodonTGCATA	3971	0.0860414	0.00625303	0.001	0.163	0.00228963	0.153796	276	0.238911	0.109853	0.0125347	0.99997	0.00524569	0.999493	1.68489e-08	Monotone	TRUE	TRUE	FALSE	TRUE	TRUE	TRUE	FALSE	TRUE
pcodonTGCATG	3971	0.0864716	0.00392686	0.048	0.235	0.0387207	0.249713	613	0.205119	0.10882	8.91089e-05	1	4.73478e-07	1	5.00189e-17	Monotone	FALSE	TRUE	FALSE	FALSE	FALSE	TRUE	FALSE	FALSE
pcodonTGCACT	3971	0.0776755	0.00125945	0.22	0.328	0.216069	0.326771	191	0.266945	0.0760585	0.017	0.713	0.00895103	0.717156	0.00011265	MIC not significant	FALSE	TRUE	FALSE	FALSE	FALSE	TRUE	FALSE	FALSE
pcodonTGCACC	3971	0.0745412	2.35673e-06	0.514	0.476	0.533729	0.501176	149	0.400981	0.188649	9.90099e-06	0.717782	2.36908e-09	0.731599	3.12459e-08	MIC not significant	FALSE	TRUE	FALSE	FALSE	FALSE	TRUE	FALSE	FALSE
pcodonTGCACA	3971	0.0769734	0.00126124	0.19	0.315	0.188726	0.33817	67	0.258058	0.0683738	0.634	0.973	0.68154	0.95282	0.0325657	MIC not significant	FALSE	FALSE	FALSE	FALSE	FALSE	FALSE	FALSE	FALSE
pcodonTGCACG	3971	0.0773763	9.79485e-05	0.282	0.263	0.291718	0.273805	211	0.240451	0.0903946	0.082	0.999	0.087389	0.992077	8.80474e-06	MIC not significant	FALSE	FALSE	FALSE	FALSE	FALSE	FALSE	FALSE	FALSE
pcodonTGCAAT	3971	0.0778686	0.00622883	0.125	0.833	0.135849	0.83228	155	0.272184	0.0648476	0.065	0.705	0.0455304	0.721211	0.00138571	MIC not significant	FALSE	FALSE	FALSE	FALSE	FALSE	FALSE	FALSE	FALSE
pcodonTGCAAC	3971	0.0753908	0.000493369	0.376	0.399	0.386589	0.420606	139	0.244333	0.0610326	0.253	0.926	0.27275	0.909562	0.00336858	MIC not significant	FALSE	FALSE	FALSE	FALSE	FALSE	FALSE	FALSE	FALSE
pcodonTGCAAA	3971	0.0737853	4.91679e-05	0.62	0.588	0.62503	0.595682	102	0.302633	0.216017	0.129842	1	0.12974	0.999998	8.60295e-07	MIC not significant	FALSE	FALSE	FALSE	FALSE	FALSE	FALSE	FALSE	FALSE
pcodonTGCAAG	3971	0.0815078	0.00502877	0.145	0.642	0.149758	0.652225	361	0.260247	0.12407	2.9703e-05	0.999614	1.86907e-07	0.997142	5.52529e-12	MIC not significant	FALSE	TRUE	FALSE	FALSE	FALSE	TRUE	FALSE	FALSE
pcodonTGCAGT	3971	0.0753346	0.00126095	0.384	0.505	0.386716	0.528083	128	0.323334	0.146983	0.013	0.983	0.0044734	0.968874	7.93849e-06	MIC not significant	FALSE	TRUE	FALSE	FALSE	FALSE	TRUE	FALSE	FALSE
pcodonTGCAGC	3971	0.0743015	4.10009e-05	0.535	0.508	0.557974	0.528809	163	0.289084	0.153432	0.0118911	0.999921	0.00404371	0.999014	2.33376e-07	MIC not significant	FALSE	TRUE	FALSE	FALSE	FALSE	TRUE	FALSE	FALSE
pcodonTGCAGA	3971	0.0776697	0.00114462	0.171	0.228	0.156197	0.238056	137	0.35675	0.21118	0.001	0.999	5.33708e-06	0.996084	1.61627e-08	MIC not significant	FALSE	TRUE	FALSE	FALSE	FALSE	TRUE	FALSE	FALSE
pcodonTGCAGG	3971	0.0760932	0.000646269	0.552	0.611	0.566136	0.610761	276	0.28897	0.185985	1.9802e-05	1	8.98056e-08	0.999999	6.27915e-14	MIC not significant	FALSE	TRUE	FALSE	FALSE	FALSE	TRUE	FALSE	FALSE
pcodonTGCGTC	3971	0.0732479	0.00241009	0.748	0.912	0.742665	0.908498	203	0.272657	0.142039	0.0142277	1	0.00599762	0.999793	2.98536e-08	MIC not significant	FALSE	TRUE	FALSE	FALSE	FALSE	TRUE	FALSE	FALSE
pcodonTGCGTG	3971	0.0762031	0.00113293	0.443	0.538	0.46062	0.569667	223	0.275748	0.0882761	0.002	0.604	0.000142198	0.630094	6.35366e-06	MIC not significant	FALSE	TRUE	FALSE	FALSE	FALSE	TRUE	FALSE	FALSE
pcodonTGCGCT	3971	0.0852246	0.0110424	0.003	0.643	0.00119019	0.656606	220	0.29328	0.148594	0.00049505	0.99895	9.90071e-06	0.994467	3.31457e-09	Monotone	TRUE	TRUE	FALSE	TRUE	TRUE	TRUE	FALSE	TRUE
pcodonTGCGCC	3971	0.076497	3.12672e-06	0.349	0.321	0.366463	0.33559	202	0.359202	0.140693	1.9802e-05	0.353842	2.41725e-10	0.384109	3.79582e-08	MIC not significant	FALSE	TRUE	FALSE	FALSE	FALSE	TRUE	FALSE	FALSE
pcodonTGCGCA	3971	0.0741583	0.000831862	0.546	0.651	0.578764	0.669049	92	0.330957	0.13009	0.035	0.882	0.020494	0.858675	0.000412619	MIC not significant	FALSE	FALSE	FALSE	FALSE	FALSE	TRUE	FALSE	FALSE
pcodonTGCGCG	3971	0.0821337	0.00062717	0.077	0.09	0.0673063	0.0823685	298	0.312746	0.17205	0	0.999436	2.46856e-12	0.996641	8.05331e-14	MIC not significant	FALSE	TRUE	FALSE	FALSE	FALSE	TRUE	FALSE	FALSE
pcodonTGCGAC	3971	0.0746409	0.0024159	0.515	0.831	0.543368	0.837588	80	0.341185	0.101359	0.024	0.361	0.00815115	0.41035	0.00400128	MIC not significant	FALSE	TRUE	FALSE	FALSE	FALSE	TRUE	FALSE	FALSE
pcodonTGCGAA	3971	0.0729681	0.000283789	0.719	0.729	0.718008	0.720857	150	0.422777	0.154974	0	0.0809604	5.69607e-12	0.0722177	6.23362e-07	MIC not significant	FALSE	TRUE	FALSE	FALSE	FALSE	TRUE	FALSE	FALSE
pcodonTGCGAG	3971	0.0799402	0.000134556	0.036	0.034	0.0274177	0.0234009	127	0.35486	0.209719	0.00219802	0.999822	0.00017596	0.998246	6.18157e-08	Monotone	FALSE	TRUE	FALSE	FALSE	FALSE	TRUE	FALSE	FALSE
pcodonTGCGGT	3971	0.0813421	0.00163425	0.152	0.26	0.145785	0.269577	365	0.271362	0.120783	0	0.975584	1.48955e-09	0.962079	8.42969e-12	MIC not significant	FALSE	TRUE	FALSE	FALSE	FALSE	TRUE	FALSE	FALSE
pcodonTGCGGC	3971	0.0792158	8.54545e-05	0.243	0.233	0.234726	0.220291	272	0.243718	0.112706	0.0107327	0.99995	0.0040827	0.999426	1.3716e-08	MIC not significant	FALSE	TRUE	FALSE	FALSE	FALSE	TRUE	FALSE	FALSE
pcodonTGCGGA	3971	0.0783443	2.0644e-05	0.473	0.439	0.487779	0.458172	378	0.225611	0.103581	0.00194059	0.99998	0.000309175	0.999616	1.4758e-10	MIC not significant	FALSE	TRUE	FALSE	FALSE	FALSE	TRUE	FALSE	FALSE
pcodonTGCGGG	3971	0.0766166	0.00042245	0.623	0.647	0.63205	0.651882	346	0.23871	0.141692	0.000990099	1	6.14032e-05	1	4.33467e-13	MIC not significant	FALSE	TRUE	FALSE	FALSE	FALSE	TRUE	FALSE	FALSE
pcodonTGATTT	3971	0.105739	0.0231219	0	0.369713	2.87806e-12	0.379865	871	0.189818	0.0826612	0	0.99998	1.69001e-09	0.99966	4.86944e-18	Monotone	TRUE	TRUE	FALSE	TRUE	TRUE	TRUE	FALSE	TRUE
pcodonTGATTC	3971	0.080688	0.00724085	0.376	0.959	0.378494	0.954018	519	0.217931	0.116827	0.000118812	1	1.77607e-06	0.999999	1.14255e-15	MIC not significant	FALSE	TRUE	FALSE	FALSE	FALSE	TRUE	FALSE	FALSE
pcodonTGATTA	3971	0.0792791	0.00278965	0.626	0.848	0.630033	0.853105	602	0.203293	0.0807189	0.000148515	0.999366	4.22563e-06	0.996365	1.21852e-12	MIC not significant	FALSE	TRUE	FALSE	FALSE	FALSE	TRUE	FALSE	FALSE
pcodonTGATTG	3971	0.110794	0.0300269	0	0.49604	2.41946e-18	0.5066	724	0.209255	0.0840025	0	0.960891	1.70081e-12	0.946646	1.76971e-15	Monotone	TRUE	TRUE	FALSE	FALSE	TRUE	TRUE	FALSE	FALSE
pcodonTGATCT	3971	0.0854105	0.00657836	0.02	0.368	0.0159115	0.390538	393	0.247362	0.101722	0.000118812	0.989624	1.20023e-06	0.978804	9.6482e-11	Monotone	FALSE	TRUE	FALSE	FALSE	TRUE	TRUE	FALSE	TRUE
pcodonTGATCC	3971	0.0793528	0.000105494	0.192	0.188	0.190003	0.17792	263	0.335942	0.186045	0	0.997911	4.72484e-13	0.991635	2.42552e-13	MIC not significant	FALSE	TRUE	FALSE	FALSE	FALSE	TRUE	FALSE	FALSE
pcodonTGATCA	3971	0.0832088	0.0109227	0.006	0.787	0.00522412	0.804276	192	0.251282	0.0992364	0.032	0.996	0.0286741	0.99037	8.57299e-06	Monotone	TRUE	TRUE	FALSE	TRUE	TRUE	TRUE	FALSE	TRUE
pcodonTGATCG	3971	0.08327	0.00236149	0.109	0.255	0.111646	0.267522	455	0.206641	0.0975745	0.00382178	1	0.000854335	0.999982	9.3592e-12	MIC not significant	FALSE	TRUE	FALSE	FALSE	FALSE	TRUE	FALSE	FALSE
pcodonTGATAT	3971	0.0751601	0.001728	0.842	0.934	0.846505	0.927316	431	0.235028	0.115809	0.000138614	0.99999	3.40444e-06	0.999888	3.80498e-13	MIC not significant	FALSE	TRUE	FALSE	FALSE	FALSE	TRUE	FALSE	FALSE
pcodonTGATAC	3971	0.0754019	0.00229178	0.57	0.799	0.58249	0.796955	258	0.284736	0.172401	7.92079e-05	1	3.29242e-07	0.999964	3.56758e-12	MIC not significant	FALSE	TRUE	FALSE	FALSE	FALSE	TRUE	FALSE	FALSE
pcodonTGATAA	3971	0.0794073	0.00777114	0.103	0.856	0.104137	0.855656	196	0.286945	0.103945	0.001	0.765	0.000124191	0.779132	4.05669e-06	MIC not significant	FALSE	TRUE	FALSE	FALSE	FALSE	TRUE	FALSE	FALSE
pcodonTGATAG	3971	0.0858637	0.00430623	0.019	0.168	0.0141211	0.159223	415	0.239211	0.159277	4.9505e-05	1	3.92362e-07	1	2.67959e-17	Monotone	TRUE	TRUE	FALSE	TRUE	TRUE	TRUE	FALSE	TRUE
pcodonTGATGT	3971	0.097209	0.0192781	0	0.435594	2.40124e-09	0.446565	345	0.232724	0.097267	0.00240594	0.99899	0.000358045	0.995119	3.2168e-09	Monotone	TRUE	TRUE	FALSE	TRUE	TRUE	TRUE	FALSE	TRUE
pcodonTGATGC	3971	0.0837886	0.00130877	0.032	0.059	0.0241957	0.0505919	328	0.28696	0.167993	0	1	7.34634e-10	0.999959	1.01563e-14	Monotone	FALSE	TRUE	FALSE	FALSE	FALSE	TRUE	FALSE	FALSE
pcodonTGATGA	3971	0.0879034	0.00394718	0.007	0.071	0.00471751	0.0609786	432	0.232276	0.110471	0.000267327	1	7.19534e-06	0.999788	1.33344e-12	Monotone	TRUE	TRUE	FALSE	TRUE	TRUE	TRUE	FALSE	TRUE
pcodonTGATGG	3971	0.0872954	0.00561968	0.018	0.281	0.0175261	0.288995	564	0.242564	0.102573	0	0.918089	4.98008e-14	0.906232	6.42068e-15	non-significant monotone/non-monotone	TRUE	TRUE	FALSE	FALSE	TRUE	TRUE	FALSE	FALSE
pcodonTGACTT	3971	0.0855253	0.0050808	0.041	0.342	0.0417567	0.366549	509	0.210144	0.107196	0.00106931	1	8.52874e-05	0.999999	3.49886e-14	Monotone	FALSE	TRUE	FALSE	FALSE	FALSE	TRUE	FALSE	FALSE
pcodonTGACTC	3971	0.0724017	0.00069821	0.784	0.836	0.787577	0.832993	117	0.276325	0.0740157	0.104	0.762	0.0999947	0.766264	0.00300382	MIC not significant	FALSE	FALSE	FALSE	FALSE	FALSE	FALSE	FALSE	FALSE
pcodonTGACTA	3971	0.0811208	0.00376499	0.033	0.214	0.0296395	0.221585	197	0.280884	0.102247	0.005	0.822	0.000437716	0.825042	4.64229e-06	non-significant monotone/non-monotone	FALSE	TRUE	FALSE	FALSE	FALSE	TRUE	FALSE	FALSE
pcodonTGACTG	3971	0.0854353	0.00849517	0.004	0.382	0.0025926	0.39735	255	0.232199	0.0919891	0.028	0.999	0.0156355	0.994249	7.96453e-07	Monotone	TRUE	TRUE	FALSE	TRUE	TRUE	TRUE	FALSE	TRUE
pcodonTGACCT	3971	0.0779086	0.000128291	0.425	0.418	0.452185	0.438192	325	0.317009	0.143315	0	0.746911	4.72687e-15	0.754365	1.62875e-12	MIC not significant	FALSE	TRUE	FALSE	FALSE	FALSE	TRUE	FALSE	FALSE
pcodonTGACCC	3971	0.0784122	0.00433796	0.114	0.54	0.108264	0.554037	159	0.271034	0.119695	0.045	0.998	0.0330467	0.994774	7.93883e-06	MIC not significant	FALSE	FALSE	FALSE	FALSE	FALSE	TRUE	FALSE	FALSE
pcodonTGACCA	3971	0.0796757	0.00165685	0.033	0.091	0.0257479	0.0806717	94	0.360067	0.139337	0.007	0.687	0.00123652	0.688581	0.000210952	non-significant monotone/non-monotone	FALSE	TRUE	FALSE	FALSE	FALSE	TRUE	FALSE	FALSE
pcodonTGACCG	3971	0.0702478	0.000775277	0.986	0.991	0.983453	0.989132	291	0.269222	0.155249	0.00039604	1	1.44737e-05	0.999992	3.02085e-12	MIC not significant	FALSE	TRUE	FALSE	FALSE	FALSE	TRUE	FALSE	FALSE
pcodonTGACAT	3971	0.0776825	0.00360798	0.086	0.737	0.0749061	0.773254	43	0.210887	0.0269968	0.845	0.855	0.825598	0.841424	0.292405	MIC not significant	FALSE	FALSE	FALSE	FALSE	FALSE	FALSE	FALSE	FALSE
pcodonTGACAG	3971	0.076909	0.000401465	0.173	0.184	0.172754	0.187334	111	0.222925	0.0383046	0.733	0.967	0.746405	0.941477	0.0395323	MIC not significant	FALSE	FALSE	FALSE	FALSE	FALSE	FALSE	FALSE	FALSE
pcodonTGACGT	3971	0.0830717	0.00625334	0.058	0.571	0.050979	0.589204	338	0.294205	0.162846	0	0.999733	1.67763e-12	0.998519	1.14147e-14	MIC not significant	FALSE	TRUE	FALSE	FALSE	FALSE	TRUE	FALSE	FALSE
pcodonTGACGC	3971	0.0782223	0.00677056	0.109	0.817	0.0970633	0.828374	127	0.278783	0.0969233	0.146	0.98	0.146513	0.960391	0.000367019	MIC not significant	FALSE	FALSE	FALSE	FALSE	FALSE	FALSE	FALSE	FALSE
pcodonTGACGA	3971	0.0869082	0.00913597	0.002	0.359	0.00128332	0.374409	282	0.264941	0.135584	0.000356436	0.999911	9.22744e-06	0.998995	1.75281e-10	Monotone	TRUE	TRUE	FALSE	TRUE	TRUE	TRUE	FALSE	TRUE
pcodonTGACGG	3971	0.0897282	0.0104408	0.000322581	0.261452	0.000116612	0.268347	325	0.259033	0.163656	0.000445545	1	1.31469e-05	1	3.15201e-14	Monotone	TRUE	TRUE	FALSE	TRUE	TRUE	TRUE	FALSE	TRUE
pcodonTGAATT	3971	0.0957973	0.0121011	0.000193548	0.269065	3.16025e-05	0.277136	899	0.204481	0.106928	0	1	7.68482e-17	0.999987	7.57897e-24	Monotone	TRUE	TRUE	FALSE	TRUE	TRUE	TRUE	FALSE	TRUE
pcodonTGAATC	3971	0.0756373	0.00407296	0.854	0.989	0.844164	0.983158	477	0.264979	0.172642	0	1	7.64692e-15	1	2.4699e-21	MIC not significant	FALSE	TRUE	FALSE	FALSE	FALSE	TRUE	FALSE	FALSE
pcodonTGAATA	3971	0.0962068	0.0134258	0	0.0773366	3.46845e-08	0.0731051	382	0.230953	0.0865733	0.001	0.976	3.78172e-05	0.96437	4.56889e-09	Monotone	TRUE	TRUE	FALSE	TRUE	TRUE	TRUE	FALSE	FALSE
pcodonTGAATG	3971	0.0912217	0.013874	0.008	0.871	0.00310816	0.864341	795	0.196777	0.0989968	0	1	3.35403e-10	0.999996	9.96582e-20	Monotone	TRUE	TRUE	FALSE	TRUE	TRUE	TRUE	FALSE	TRUE
pcodonTGAACT	3971	0.0848008	0.0021081	0.032	0.11	0.0354955	0.108045	444	0.256227	0.158995	0	1	4.12217e-11	1	2.25802e-18	Monotone	FALSE	TRUE	FALSE	FALSE	FALSE	TRUE	FALSE	FALSE
pcodonTGAACC	3971	0.0752237	0.00030903	0.732	0.736	0.73694	0.742171	309	0.270115	0.150136	4.9505e-05	1	2.64182e-07	0.999872	1.6492e-12	MIC not significant	FALSE	TRUE	FALSE	FALSE	FALSE	TRUE	FALSE	FALSE
pcodonTGAACA	3971	0.0761791	0.00315155	0.315	0.709	0.345583	0.716532	181	0.308353	0.14966	0.001	0.993	0.000111813	0.987304	7.46745e-08	MIC not significant	FALSE	TRUE	FALSE	FALSE	FALSE	TRUE	FALSE	FALSE
pcodonTGAACG	3971	0.0821091	0.00164584	0.226	0.362	0.232523	0.371718	516	0.307726	0.208995	0	1	5.59847e-33	1	5.18997e-28	MIC not significant	FALSE	TRUE	FALSE	FALSE	FALSE	TRUE	FALSE	FALSE
pcodonTGAAAT	3971	0.0813677	0.00796958	0.094	0.85	0.1004	0.848367	297	0.240392	0.092877	0.009	0.997	0.00323963	0.988993	8.41777e-08	MIC not significant	FALSE	TRUE	FALSE	FALSE	FALSE	TRUE	FALSE	FALSE
pcodonTGAAAC	3971	0.0763429	0.00207906	0.502	0.705	0.505652	0.710321	258	0.256019	0.150789	0.00231683	1	0.00023103	0.999989	1.03083e-10	MIC not significant	FALSE	TRUE	FALSE	FALSE	FALSE	TRUE	FALSE	FALSE
pcodonTGAAAA	3971	0.0765095	0.0028892	0.284	0.623	0.289582	0.628554	158	0.314284	0.157496	0.003	0.996	0.000300228	0.990105	2.43786e-07	MIC not significant	FALSE	TRUE	FALSE	FALSE	FALSE	TRUE	FALSE	FALSE
pcodonTGAAAG	3971	0.0839044	0.00212467	0.096	0.238	0.106733	0.243935	504	0.20109	0.10386	0.0019505	1	0.000259281	0.999999	1.20892e-13	MIC not significant	FALSE	TRUE	FALSE	FALSE	FALSE	TRUE	FALSE	FALSE
pcodonTGAAGT	3971	0.0780192	0.00476888	0.366	0.853	0.383707	0.850965	293	0.261199	0.144091	0.0010396	1	7.45895e-05	0.999979	1.7787e-11	MIC not significant	FALSE	TRUE	FALSE	FALSE	FALSE	TRUE	FALSE	FALSE
pcodonTGAAGC	3971	0.0751296	5.37828e-05	0.68	0.665	0.687859	0.66548	268	0.290009	0.174241	3.9604e-05	1	3.43857e-07	0.99998	1.00613e-12	MIC not significant	FALSE	TRUE	FALSE	FALSE	FALSE	TRUE	FALSE	FALSE
pcodonTGAAGA	3971	0.0749747	0.00203328	0.619	0.807	0.626499	0.805766	239	0.302772	0.159372	9.90099e-05	0.999614	3.33562e-07	0.99685	1.47684e-10	MIC not significant	FALSE	TRUE	FALSE	FALSE	FALSE	TRUE	FALSE	FALSE
pcodonTGAAGG	3971	0.08107	0.000105684	0.267	0.262	0.275719	0.260995	481	0.276557	0.165701	0	1	1.06716e-18	0.999969	1.27063e-20	MIC not significant	FALSE	TRUE	FALSE	FALSE	FALSE	TRUE	FALSE	FALSE
pcodonTGAGTC	3971	0.0773487	0.000354434	0.319	0.33	0.333733	0.34296	234	0.266728	0.137108	0.00623762	0.99998	0.0015483	0.999734	5.13027e-09	MIC not significant	FALSE	TRUE	FALSE	FALSE	FALSE	TRUE	FALSE	FALSE
pcodonTGAGTG	3971	0.0850698	0.0061301	0.015	0.277	0.00887492	0.284694	310	0.241521	0.114929	0.00313861	0.99998	0.000464408	0.999473	8.944e-10	Monotone	TRUE	TRUE	FALSE	TRUE	TRUE	TRUE	FALSE	TRUE
pcodonTGAGCT	3971	0.0858861	0.00186109	0.024	0.063	0.0232785	0.0632286	476	0.2185	0.137745	0.00050495	1	2.50545e-05	1	5.42554e-17	Monotone	FALSE	TRUE	FALSE	FALSE	FALSE	TRUE	FALSE	FALSE
pcodonTGAGCC	3971	0.0769547	0.000479445	0.532	0.564	0.552026	0.579114	324	0.286621	0.186128	9.90099e-06	1	1.8419e-09	1	4.0419e-16	MIC not significant	FALSE	TRUE	FALSE	FALSE	FALSE	TRUE	FALSE	FALSE
pcodonTGAGCA	3971	0.0729596	0.00156748	0.796	0.903	0.801739	0.895753	220	0.279857	0.174993	0.00158416	1	0.000117088	0.999995	9.90257e-11	MIC not significant	FALSE	TRUE	FALSE	FALSE	FALSE	TRUE	FALSE	FALSE
pcodonTGAGCG	3971	0.0745393	0.00361845	0.955	0.999	0.948944	0.996061	571	0.284779	0.218074	0	1	4.19986e-30	1	2.86999e-32	MIC not significant	FALSE	TRUE	FALSE	FALSE	FALSE	TRUE	FALSE	FALSE
pcodonTGAGAC	3971	0.0790173	0.00772143	0.07	0.897	0.0593408	0.887714	102	0.294242	0.0658774	0.163	0.738	0.165186	0.736488	0.00921349	MIC not significant	FALSE	FALSE	FALSE	FALSE	FALSE	FALSE	FALSE	FALSE
pcodonTGAGAA	3971	0.067716	0.00116215	0.991	0.998	0.98896	0.995231	167	0.289738	0.0750356	0.005	0.397	0.000852415	0.407347	0.000340866	MIC not significant	FALSE	TRUE	FALSE	FALSE	FALSE	TRUE	FALSE	FALSE
pcodonTGAGAG	3971	0.0702852	0.000389828	0.935	0.943	0.925789	0.933123	154	0.316721	0.110381	0.007	0.743	0.001101	0.746175	2.55874e-05	MIC not significant	FALSE	TRUE	FALSE	FALSE	FALSE	TRUE	FALSE	FALSE
pcodonTGAGGT	3971	0.0804803	0.00587027	0.188	0.817	0.20803	0.81517	352	0.262137	0.0955473	1.9802e-05	0.66595	1.75492e-08	0.683699	3.13346e-09	MIC not significant	FALSE	TRUE	FALSE	FALSE	FALSE	TRUE	FALSE	FALSE
pcodonTGAGGC	3971	0.0800297	0.000946059	0.183	0.246	0.17708	0.238573	288	0.259022	0.0892767	0.00050495	0.752614	1.61817e-05	0.760575	2.37713e-07	MIC not significant	FALSE	TRUE	FALSE	FALSE	FALSE	TRUE	FALSE	FALSE
pcodonTGAGGA	3971	0.0764766	1.82745e-07	0.743	0.717	0.742199	0.718882	428	0.267093	0.149168	0	1	4.52963e-14	0.999609	1.12537e-16	MIC not significant	FALSE	TRUE	FALSE	FALSE	FALSE	TRUE	FALSE	FALSE
pcodonTGAGGG	3971	0.0856087	0.00553729	0.041	0.447	0.0420497	0.436371	533	0.235681	0.127896	0	1	2.81511e-11	0.99997	1.58925e-17	Monotone	FALSE	TRUE	FALSE	FALSE	FALSE	TRUE	FALSE	FALSE
pcodonTGGTTT	3971	0.095124	0.00821822	6.45161e-05	0.0474194	2.67382e-05	0.0420889	749	0.21766	0.103435	0	0.999703	1.88408e-15	0.997999	1.74662e-19	Monotone	TRUE	TRUE	FALSE	TRUE	TRUE	TRUE	FALSE	TRUE
pcodonTGGTTC	3971	0.0823448	0.00665886	0.186	0.81	0.170389	0.820756	471	0.297063	0.183801	0	1	1.37275e-23	0.999972	1.76229e-22	MIC not significant	FALSE	TRUE	FALSE	FALSE	FALSE	TRUE	FALSE	FALSE
pcodonTGGTTA	3971	0.087205	0.00262648	0.014	0.077	0.0139038	0.0686293	548	0.227981	0.120634	0	1	9.40303e-11	0.999958	5.55996e-17	Monotone	TRUE	TRUE	FALSE	TRUE	TRUE	TRUE	FALSE	TRUE
pcodonTGGTTG	3971	0.100409	0.0218061	0	0.693822	5.65446e-09	0.699956	650	0.20928	0.0882938	0	0.999079	7.49659e-09	0.995998	1.02181e-14	Monotone	TRUE	TRUE	FALSE	TRUE	TRUE	TRUE	FALSE	TRUE
pcodonTGGTCT	3971	0.0871365	0.0081991	0.003	0.331	0.00264709	0.348782	359	0.245701	0.0818657	0.000722772	0.848574	2.29134e-05	0.843812	3.4266e-08	non-significant monotone/non-monotone	TRUE	TRUE	FALSE	FALSE	TRUE	TRUE	FALSE	FALSE
pcodonTGGTCC	3971	0.0783068	1.71669e-05	0.402	0.371	0.402605	0.371489	317	0.297523	0.171253	0	0.99997	1.88223e-12	0.999273	1.51608e-14	MIC not significant	FALSE	TRUE	FALSE	FALSE	FALSE	TRUE	FALSE	FALSE
pcodonTGGTCA	3971	0.0760746	0.00358625	0.343	0.729	0.341807	0.747179	170	0.280066	0.114014	0.014	0.97	0.00452684	0.954179	6.69919e-06	MIC not significant	FALSE	TRUE	FALSE	FALSE	FALSE	TRUE	FALSE	FALSE
pcodonTGGTCG	3971	0.0823795	0.00249016	0.178	0.378	0.180939	0.398668	484	0.212855	0.0914215	0.000712871	0.99998	5.69622e-05	0.999283	1.08772e-11	MIC not significant	FALSE	TRUE	FALSE	FALSE	FALSE	TRUE	FALSE	FALSE
pcodonTGGTAT	3971	0.0811353	0.00226699	0.232	0.438	0.23589	0.445002	424	0.251259	0.104748	9.90099e-06	0.92298	3.86097e-10	0.910109	8.53286e-12	MIC not significant	FALSE	TRUE	FALSE	FALSE	FALSE	TRUE	FALSE	FALSE
pcodonTGGTAC	3971	0.0818859	0.00978615	0.026	0.801	0.0182192	0.812255	187	0.264498	0.109746	0.03	0.996	0.0214425	0.985477	3.63475e-06	Monotone	FALSE	TRUE	FALSE	FALSE	TRUE	TRUE	FALSE	TRUE
pcodonTGGTAA	3971	0.0798058	0.00533403	0.087	0.551	0.0791188	0.570523	196	0.267473	0.105909	0.006	0.964	0.00222813	0.954422	3.25081e-06	MIC not significant	FALSE	TRUE	FALSE	FALSE	FALSE	TRUE	FALSE	FALSE
pcodonTGGTAG	3971	0.082659	0.0105025	0.051	0.896	0.0404565	0.883292	271	0.271438	0.129787	0.000643564	0.999455	2.17366e-05	0.9966	9.98991e-10	MIC not significant	FALSE	TRUE	FALSE	FALSE	FALSE	TRUE	FALSE	FALSE
pcodonTGGTGT	3971	0.0931782	0.0183942	6.45161e-05	0.850129	7.24356e-06	0.848014	406	0.292237	0.152476	0	0.994653	2.87173e-17	0.986263	3.07498e-16	Monotone	TRUE	TRUE	FALSE	TRUE	TRUE	TRUE	FALSE	TRUE
pcodonTGGTGC	3971	0.0857565	0.00353479	0.027	0.152	0.0216927	0.14846	448	0.225094	0.102343	0.000316832	0.99998	8.27162e-06	0.999269	4.05089e-12	Monotone	FALSE	TRUE	FALSE	FALSE	FALSE	TRUE	FALSE	FALSE
pcodonTGGTGA	3971	0.080273	0.00218742	0.3	0.506	0.303626	0.51857	402	0.246727	0.127548	5.94059e-05	1	2.70806e-07	0.999873	1.54514e-13	MIC not significant	FALSE	TRUE	FALSE	FALSE	FALSE	TRUE	FALSE	FALSE
pcodonTGGTGG	3971	0.0796375	0.00267543	0.646	0.871	0.655626	0.862578	695	0.21792	0.128941	0	1	7.52415e-13	1	1.40782e-22	MIC not significant	FALSE	TRUE	FALSE	FALSE	FALSE	TRUE	FALSE	FALSE
pcodonTGGCTT	3971	0.0883849	0.00370116	0.019	0.121	0.0147278	0.122642	723	0.224686	0.106213	0	0.996188	7.76432e-18	0.989845	2.36938e-19	Monotone	TRUE	TRUE	FALSE	TRUE	TRUE	TRUE	FALSE	TRUE
pcodonTGGCTC	3971	0.0812845	0.000681642	0.074	0.094	0.0633837	0.08062	242	0.246822	0.102819	0.028	0.999	0.0128834	0.994485	3.43929e-07	MIC not significant	FALSE	TRUE	FALSE	FALSE	FALSE	TRUE	FALSE	FALSE
pcodonTGGCTA	3971	0.089939	0.013783	0.000387097	0.623742	9.76345e-05	0.632836	329	0.238811	0.0727218	0.002	0.847	0.00097844	0.844778	6.86895e-07	non-significant monotone/non-monotone	TRUE	TRUE	FALSE	FALSE	TRUE	TRUE	FALSE	FALSE
pcodonTGGCTG	3971	0.0899434	0.0100242	0.000774194	0.318226	0.000462587	0.327027	428	0.232156	0.120625	0.000118812	1	5.29531e-07	0.999946	1.4068e-13	Monotone	TRUE	TRUE	FALSE	TRUE	TRUE	TRUE	FALSE	TRUE
pcodonTGGCCT	3971	0.0814281	0.000170013	0.369	0.357	0.379783	0.369505	611	0.246504	0.154587	0	1	3.29886e-18	1	5.05259e-24	MIC not significant	FALSE	TRUE	FALSE	FALSE	FALSE	TRUE	FALSE	FALSE
pcodonTGGCCC	3971	0.0793434	0.00753055	0.138	0.861	0.136431	0.86002	217	0.257746	0.0992777	0.016	0.985	0.00639873	0.96914	2.1814e-06	MIC not significant	FALSE	TRUE	FALSE	FALSE	FALSE	TRUE	FALSE	FALSE
pcodonTGGCCA	3971	0.084425	0.00806077	0.003	0.298	0.00109307	0.30352	182	0.347133	0.115933	9.90099e-06	0.212485	5.70833e-08	0.226963	2.56241e-06	non-significant monotone/non-monotone	TRUE	TRUE	FALSE	FALSE	TRUE	TRUE	FALSE	FALSE
pcodonTGGCCG	3971	0.0793367	0.00333732	0.491	0.834	0.506966	0.823346	496	0.218862	0.0906676	0.000108911	0.997901	1.29139e-06	0.992637	7.45167e-12	MIC not significant	FALSE	TRUE	FALSE	FALSE	FALSE	TRUE	FALSE	FALSE
pcodonTGGCAT	3971	0.078154	0.00568193	0.102	0.895	0.106751	0.887676	64	0.41394	0.154553	0.012	0.582	0.00312893	0.616363	0.00142001	MIC not significant	FALSE	TRUE	FALSE	FALSE	FALSE	TRUE	FALSE	FALSE
pcodonTGGCAC	3971	0.0739761	0.0021761	0.696	0.94	0.718517	0.925887	64	0.373654	0.132038	0.063	0.768	0.0463558	0.765527	0.00334063	MIC not significant	FALSE	FALSE	FALSE	FALSE	FALSE	FALSE	FALSE	FALSE
pcodonTGGCAA	3971	0.0769705	0.00430473	0.191	0.965	0.195064	0.944958	46	0.656105	0.477859	9.90099e-06	0.85995	7.83198e-14	0.842655	3.32009e-07	MIC not significant	FALSE	TRUE	FALSE	FALSE	FALSE	TRUE	FALSE	FALSE
pcodonTGGCAG	3971	0.0764968	0.000776196	0.293	0.352	0.320109	0.382544	175	0.328259	0.0496609	0.000663366	0.0190594	2.24759e-05	0.00943433	0.00303438	MIC not significant	FALSE	TRUE	FALSE	FALSE	FALSE	TRUE	FALSE	FALSE
pcodonTGGCGT	3971	0.0905431	0.00278204	0.000225806	0.00180645	5.38682e-05	0.000899202	335	0.262462	0.129593	0.000118812	0.999921	6.31393e-07	0.998469	1.09539e-11	Monotone	TRUE	TRUE	FALSE	TRUE	TRUE	TRUE	FALSE	TRUE
pcodonTGGCGC	3971	0.0808759	0.00513203	0.036	0.352	0.0272584	0.362504	164	0.22772	0.0882921	0.330653	0.999792	0.364537	0.997943	0.000111646	MIC not significant	FALSE	FALSE	FALSE	FALSE	FALSE	FALSE	FALSE	FALSE
pcodonTGGCGA	3971	0.081503	0.00566701	0.073	0.556	0.064906	0.565241	262	0.292855	0.145443	0.000128713	0.99901	7.58065e-07	0.994834	1.69729e-10	MIC not significant	FALSE	TRUE	FALSE	FALSE	FALSE	TRUE	FALSE	FALSE
pcodonTGGCGG	3971	0.0817897	0.00590804	0.149	0.738	0.14146	0.73958	403	0.22748	0.11072	0.00141584	1	0.000118907	0.999942	7.11104e-12	MIC not significant	FALSE	TRUE	FALSE	FALSE	FALSE	TRUE	FALSE	FALSE
pcodonTGGATT	3971	0.0897242	0.00296942	0.028	0.125	0.0237562	0.116522	1187	0.196062	0.0976009	0	0.999911	2.77659e-25	0.99913	2.75824e-28	Monotone	FALSE	TRUE	FALSE	FALSE	FALSE	TRUE	FALSE	FALSE
pcodonTGGATC	3971	0.0851268	0.000751166	0.104	0.126	0.101121	0.126966	626	0.229382	0.16388	0	1	2.97241e-14	1	4.37725e-26	MIC not significant	FALSE	TRUE	FALSE	FALSE	FALSE	TRUE	FALSE	FALSE
pcodonTGGATA	3971	0.0930865	0.0106729	0.000225806	0.208129	6.54119e-05	0.212501	549	0.226702	0.123542	9.90099e-06	1	8.2378e-09	0.999999	2.08155e-17	Monotone	TRUE	TRUE	FALSE	TRUE	TRUE	TRUE	FALSE	TRUE
pcodonTGGATG	3971	0.100113	0.0128071	3.22581e-05	0.0791613	2.09942e-07	0.075619	1086	0.15547	0.0679581	0.00114851	1	0.000143405	1	2.49392e-18	Monotone	TRUE	TRUE	FALSE	TRUE	TRUE	TRUE	FALSE	TRUE
pcodonTGGACT	3971	0.0845091	0.00507444	0.107	0.51	0.0959105	0.530032	545	0.219028	0.106565	2.9703e-05	0.99998	1.54294e-08	0.999781	5.34148e-15	MIC not significant	FALSE	TRUE	FALSE	FALSE	FALSE	TRUE	FALSE	FALSE
pcodonTGGACC	3971	0.0772617	0.00109147	0.716	0.788	0.722365	0.795422	488	0.226516	0.138648	6.93069e-05	1	2.37305e-07	1	1.70218e-17	MIC not significant	FALSE	TRUE	FALSE	FALSE	FALSE	TRUE	FALSE	FALSE
pcodonTGGACA	3971	0.0792728	0.00222123	0.155	0.341	0.163784	0.352717	233	0.274883	0.123002	0.00323762	0.997851	0.000457125	0.992113	3.79022e-08	MIC not significant	FALSE	TRUE	FALSE	FALSE	FALSE	TRUE	FALSE	FALSE
pcodonTGGACG	3971	0.0844544	0.00186604	0.148	0.266	0.158886	0.288674	694	0.244324	0.132974	0	0.99998	3.58487e-22	0.999614	2.98502e-23	MIC not significant	FALSE	TRUE	FALSE	FALSE	FALSE	TRUE	FALSE	FALSE
pcodonTGGAAT	3971	0.0796521	0.0071578	0.268	0.95	0.278601	0.92823	333	0.283302	0.175726	0	1	8.09605e-10	0.999997	1.32812e-15	MIC not significant	FALSE	TRUE	FALSE	FALSE	FALSE	TRUE	FALSE	FALSE
pcodonTGGAAC	3971	0.0779979	0.000783421	0.369	0.44	0.398124	0.460732	306	0.301554	0.195857	0	1	1.41299e-11	0.999997	4.16078e-16	MIC not significant	FALSE	TRUE	FALSE	FALSE	FALSE	TRUE	FALSE	FALSE
pcodonTGGAAA	3971	0.0777111	0.00316745	0.244	0.628	0.256883	0.61901	216	0.301197	0.118897	0.000257426	0.788931	3.70638e-06	0.791496	2.00764e-07	MIC not significant	FALSE	TRUE	FALSE	FALSE	FALSE	TRUE	FALSE	FALSE
pcodonTGGAAG	3971	0.077295	0.00232928	0.864	0.952	0.858235	0.953292	692	0.212173	0.155198	0	1	7.61952e-11	1	4.11133e-27	MIC not significant	FALSE	TRUE	FALSE	FALSE	FALSE	TRUE	FALSE	FALSE
pcodonTGGAGT	3971	0.0821264	0.00453159	0.119	0.527	0.11895	0.539022	377	0.277788	0.159253	0	1	3.39532e-12	0.999873	7.6292e-16	MIC not significant	FALSE	TRUE	FALSE	FALSE	FALSE	TRUE	FALSE	FALSE
pcodonTGGAGC	3971	0.0785153	0.000110007	0.527	0.511	0.521183	0.505166	440	0.218095	0.123367	0.00161386	1	0.000192878	1	3.20386e-14	MIC not significant	FALSE	TRUE	FALSE	FALSE	FALSE	TRUE	FALSE	FALSE
pcodonTGGAGA	3971	0.0817961	0.00342357	0.122	0.395	0.121007	0.406426	349	0.242235	0.142266	0.000445545	1	1.45518e-05	0.999999	3.05084e-13	MIC not significant	FALSE	TRUE	FALSE	FALSE	FALSE	TRUE	FALSE	FALSE
pcodonTGGAGG	3971	0.0817526	2.49036e-05	0.402	0.375	0.409756	0.383839	714	0.232828	0.148642	0	1	4.5741e-20	1	1.01413e-26	MIC not significant	FALSE	TRUE	FALSE	FALSE	FALSE	TRUE	FALSE	FALSE
pcodonTGGGTC	3971	0.0801904	0.00552089	0.215	0.789	0.217259	0.79185	335	0.248246	0.0755247	0.000653465	0.687594	4.07355e-05	0.703311	3.22313e-07	MIC not significant	FALSE	TRUE	FALSE	FALSE	FALSE	TRUE	FALSE	FALSE
pcodonTGGGTG	3971	0.0906285	0.00710741	0.003	0.11	0.000793807	0.110482	509	0.255246	0.151427	0	1	9.12679e-14	0.999999	7.53643e-20	Monotone	TRUE	TRUE	FALSE	TRUE	TRUE	TRUE	FALSE	TRUE
pcodonTGGGCT	3971	0.0937907	0.0232877	3.22581e-05	0.997097	1.71094e-05	0.994696	510	0.24618	0.0965195	0	0.846901	1.50713e-11	0.842975	7.1158e-13	non-significant monotone/non-monotone	TRUE	TRUE	FALSE	FALSE	TRUE	TRUE	FALSE	FALSE
pcodonTGGGCC	3971	0.0778346	0.000697378	0.62	0.68	0.631481	0.680811	435	0.226321	0.114517	0.00060396	1	3.08635e-05	0.999984	4.08389e-13	MIC not significant	FALSE	TRUE	FALSE	FALSE	FALSE	TRUE	FALSE	FALSE
pcodonTGGGCA	3971	0.0781085	0.0104236	0.212	0.997	0.200701	0.992439	217	0.272012	0.119176	0.002	0.997	0.000314796	0.990572	1.81548e-07	MIC not significant	FALSE	TRUE	FALSE	FALSE	FALSE	TRUE	FALSE	FALSE
pcodonTGGGCG	3971	0.0831631	0.0028505	0.247	0.507	0.243701	0.519575	689	0.235394	0.154878	0	1	2.52104e-18	1	6.04886e-27	MIC not significant	FALSE	TRUE	FALSE	FALSE	FALSE	TRUE	FALSE	FALSE
pcodonTGGGAC	3971	0.0768565	0.00357916	0.25	0.671	0.253447	0.659986	172	0.301654	0.0636503	0.002	0.089	8.71718e-05	0.0844305	0.000841399	MIC not significant	FALSE	TRUE	FALSE	FALSE	FALSE	TRUE	FALSE	FALSE
pcodonTGGGAA	3971	0.0778048	0.00500025	0.39	0.889	0.404267	0.884977	299	0.251296	0.0723859	0.003	0.679	0.000321525	0.705855	2.35758e-06	MIC not significant	FALSE	TRUE	FALSE	FALSE	FALSE	TRUE	FALSE	FALSE
pcodonTGGGAG	3971	0.0746976	0.00195193	0.67	0.827	0.666678	0.822794	247	0.281048	0.0858375	0.000376238	0.414099	9.23104e-06	0.445483	2.80797e-06	MIC not significant	FALSE	TRUE	FALSE	FALSE	FALSE	TRUE	FALSE	FALSE
pcodonTGGGGT	3971	0.0977457	0.0106605	0	0.044049	9.25117e-07	0.0394776	766	0.211902	0.130044	0	1	6.8127e-15	1	6.13105e-25	Monotone	TRUE	TRUE	FALSE	TRUE	TRUE	TRUE	FALSE	TRUE
pcodonTGGGGC	3971	0.0804331	0.00546182	0.481	0.933	0.486311	0.926202	591	0.198176	0.0796407	0.00116832	0.99995	9.72198e-05	0.999413	2.77634e-12	MIC not significant	FALSE	TRUE	FALSE	FALSE	FALSE	TRUE	FALSE	FALSE
pcodonTGGGGA	3971	0.0885207	0.00684641	0.021	0.402	0.0167275	0.40912	757	0.250739	0.134739	0	0.998743	3.79267e-31	0.994933	1.47073e-25	Monotone	FALSE	TRUE	FALSE	FALSE	TRUE	TRUE	FALSE	TRUE
pcodonTGGGGG	3971	0.106279	0.0218046	0	0.118149	5.10271e-14	0.116499	635	0.220839	0.118639	0	1	1.36005e-10	0.999998	3.98241e-19	Monotone	TRUE	TRUE	FALSE	TRUE	TRUE	TRUE	FALSE	TRUE
pcodonCTTTTT	3971	0.0928476	0.0102486	0.002	0.338	0.0004448	0.355391	847	0.20302	0.12175	0	1	4.94799e-14	1	1.17675e-25	Monotone	TRUE	TRUE	FALSE	TRUE	TRUE	TRUE	FALSE	TRUE
pcodonCTTTTC	3971	0.0912124	0.00961131	0.001	0.272	0.000482085	0.278579	566	0.245324	0.124327	0	0.999802	3.44037e-15	0.998181	5.1755e-18	Monotone	TRUE	TRUE	FALSE	TRUE	TRUE	TRUE	FALSE	TRUE
pcodonCTTTTA	3971	0.0822276	0.000965249	0.387	0.46	0.398311	0.479374	749	0.225201	0.124196	0	1	1.72247e-18	0.999989	2.52992e-23	MIC not significant	FALSE	TRUE	FALSE	FALSE	FALSE	TRUE	FALSE	FALSE
pcodonCTTTTG	3971	0.102744	0.0231744	0	0.705525	6.88419e-10	0.710738	857	0.183426	0.0824609	0	1	2.40608e-08	0.999935	9.86833e-18	Monotone	TRUE	TRUE	FALSE	TRUE	TRUE	TRUE	FALSE	TRUE
pcodonCTTTCT	3971	0.0904155	0.0078814	0.00083871	0.131194	0.000403593	0.129752	449	0.233496	0.0906443	7.92079e-05	0.96598	3.09877e-07	0.951547	7.33937e-11	Monotone	TRUE	TRUE	FALSE	TRUE	TRUE	TRUE	FALSE	FALSE
pcodonCTTTCC	3971	0.0866912	0.000130536	0.001	0.001	0.000605446	0.000499108	243	0.362905	0.175825	0	0.649386	1.55245e-16	0.66957	9.1252e-12	non-significant monotone/non-monotone	TRUE	TRUE	FALSE	FALSE	TRUE	TRUE	FALSE	FALSE
pcodonCTTTCA	3971	0.0797018	0.00665976	0.111	0.778	0.111932	0.773697	230	0.280166	0.141826	0.00270297	0.999901	0.000295157	0.999046	3.65968e-09	MIC not significant	FALSE	TRUE	FALSE	FALSE	FALSE	TRUE	FALSE	FALSE
pcodonCTTTCG	3971	0.0785012	0.00293693	0.559	0.831	0.576955	0.83519	463	0.22384	0.105048	0.000148515	0.99998	1.17184e-06	0.999515	8.73702e-13	MIC not significant	FALSE	TRUE	FALSE	FALSE	FALSE	TRUE	FALSE	FALSE
pcodonCTTTAT	3971	0.0810537	0.00210653	0.425	0.647	0.436089	0.653974	624	0.244843	0.136282	0	1	1.8199e-19	0.999889	1.39641e-21	MIC not significant	FALSE	TRUE	FALSE	FALSE	FALSE	TRUE	FALSE	FALSE
pcodonCTTTAC	3971	0.0848	0.0157006	0.001	0.99	0.00330008	0.984233	241	0.262772	0.136627	0.00492913	0.999992	0.00112743	0.999805	3.23236e-09	Monotone	TRUE	TRUE	FALSE	TRUE	TRUE	TRUE	FALSE	TRUE
pcodonCTTTAA	3971	0.090686	0.0189744	9.375e-05	0.953375	3.06099e-05	0.94774	315	0.257828	0.154921	0.000237624	1	3.31977e-06	0.999998	4.08286e-13	Monotone	TRUE	TRUE	FALSE	TRUE	TRUE	TRUE	FALSE	TRUE
pcodonCTTTAG	3971	0.0881943	0.00807039	0.003	0.268	0.00150282	0.279816	431	0.287148	0.166509	0	1	8.54399e-17	0.999864	1.00704e-18	Monotone	TRUE	TRUE	FALSE	TRUE	TRUE	TRUE	FALSE	TRUE
pcodonCTTTGT	3971	0.109884	0.0356778	0	0.921238	1.85094e-19	0.917223	479	0.202882	0.036892	0.008	0.401	0.00187135	0.428404	2.3141e-05	non-significant monotone/non-monotone	TRUE	TRUE	FALSE	FALSE	TRUE	TRUE	FALSE	FALSE
pcodonCTTTGC	3971	0.0788465	0.000840025	0.398	0.467	0.41226	0.483742	385	0.274839	0.157381	0	1	1.24145e-12	0.99984	5.80943e-16	MIC not significant	FALSE	TRUE	FALSE	FALSE	FALSE	TRUE	FALSE	FALSE
pcodonCTTTGA	3971	0.0877258	0.00798197	0.013	0.437	0.00977554	0.45207	516	0.214024	0.101689	0.000287129	1	9.92493e-06	0.999961	1.16448e-13	Monotone	TRUE	TRUE	FALSE	TRUE	TRUE	TRUE	FALSE	TRUE
pcodonCTTTGG	3971	0.0911444	0.00775328	0.004	0.167	0.000726478	0.181275	692	0.196827	0.10442	3.9604e-05	1	4.36418e-07	1	2.77828e-18	Monotone	TRUE	TRUE	FALSE	TRUE	TRUE	TRUE	FALSE	TRUE
pcodonCTTCTT	3971	0.0879904	0.00526732	0.028	0.314	0.0281329	0.324386	773	0.199284	0.0922284	9.90099e-06	1	1.84493e-09	0.999927	5.89462e-18	Monotone	FALSE	TRUE	FALSE	FALSE	FALSE	TRUE	FALSE	FALSE
pcodonCTTCTC	3971	0.0725969	0.000978518	0.749	0.824	0.762213	0.830257	172	0.282222	0.151729	0.004	0.999	0.00148887	0.998521	1.2819e-07	MIC not significant	FALSE	TRUE	FALSE	FALSE	FALSE	TRUE	FALSE	FALSE
pcodonCTTCTA	3971	0.0899062	0.00982	0.00229032	0.356742	0.000903518	0.36626	472	0.204536	0.0957194	0.00771287	1	0.00263448	0.999995	6.28234e-12	Monotone	TRUE	TRUE	FALSE	TRUE	TRUE	TRUE	FALSE	TRUE
pcodonCTTCTG	3971	0.0841973	0.00420791	0.02	0.188	0.0178384	0.185382	307	0.26371	0.128812	0.000227723	0.999782	3.41199e-06	0.997913	9.17069e-11	Monotone	FALSE	TRUE	FALSE	FALSE	TRUE	TRUE	FALSE	TRUE
pcodonCTTCCT	3971	0.0801917	0.00174867	0.337	0.49	0.343544	0.517225	425	0.221975	0.0801595	0.001	0.968	1.30005e-05	0.959248	2.82295e-09	MIC not significant	FALSE	TRUE	FALSE	FALSE	FALSE	TRUE	FALSE	FALSE
pcodonCTTCCC	3971	0.0820439	0.00649322	0.009	0.325	0.00469618	0.345543	131	0.302044	0.0886923	0.033	0.729	0.0199892	0.732388	0.000550936	non-significant monotone/non-monotone	TRUE	TRUE	FALSE	FALSE	TRUE	TRUE	FALSE	FALSE
pcodonCTTCCA	3971	0.0872493	0.00801097	0.000129032	0.0642581	1.9395e-05	0.0592459	155	0.29401	0.149543	0.0182673	0.999822	0.00819895	0.99805	6.68642e-07	Monotone	TRUE	TRUE	FALSE	TRUE	TRUE	TRUE	FALSE	TRUE
pcodonCTTCCG	3971	0.0795746	0.00152936	0.255	0.357	0.252685	0.38231	309	0.263073	0.146802	0.000227723	1	2.81389e-06	0.999957	3.04091e-12	MIC not significant	FALSE	TRUE	FALSE	FALSE	FALSE	TRUE	FALSE	FALSE
pcodonCTTCAT	3971	0.0776218	0.0062816	0.121	0.888	0.131084	0.877417	100	0.351004	0.152663	0.003	0.804	0.000238651	0.807894	5.84308e-05	MIC not significant	FALSE	TRUE	FALSE	FALSE	FALSE	TRUE	FALSE	FALSE
pcodonCTTCAC	3971	0.0757701	0.00137386	0.377	0.572	0.396145	0.599735	66	0.380165	0.120669	0.034	0.515	0.0177878	0.566278	0.00446286	MIC not significant	FALSE	TRUE	FALSE	FALSE	FALSE	TRUE	FALSE	FALSE
pcodonCTTCAA	3971	0.0817988	0.00903998	0.002	0.899	0.000840849	0.887469	56	0.4621	0.285052	0.001	0.968	2.52657e-05	0.945829	3.02355e-05	Monotone	TRUE	TRUE	FALSE	TRUE	TRUE	TRUE	FALSE	FALSE
pcodonCTTCAG	3971	0.0768243	5.19389e-05	0.281	0.253	0.290113	0.267579	170	0.252584	0.101146	0.068	0.996	0.0547507	0.985088	2.37536e-05	MIC not significant	FALSE	FALSE	FALSE	FALSE	FALSE	FALSE	FALSE	FALSE
pcodonCTTCGT	3971	0.0853182	0.0104636	0.024	0.848	0.0189923	0.844202	399	0.247012	0.0827858	8.91089e-05	0.719436	4.68161e-07	0.732057	4.81303e-09	non-significant monotone/non-monotone	FALSE	TRUE	FALSE	FALSE	TRUE	TRUE	FALSE	FALSE
pcodonCTTCGC	3971	0.0817581	0.00562386	0.007	0.242	0.00469118	0.251604	110	0.395617	0.112322	0.001	0.087	2.32657e-06	0.0721954	0.000344974	non-significant monotone/non-monotone	TRUE	TRUE	FALSE	FALSE	TRUE	TRUE	FALSE	FALSE
pcodonCTTCGA	3971	0.0921875	0.0148918	9.67742e-05	0.526355	9.40875e-06	0.538685	353	0.224862	0.102254	0.00386139	0.99998	0.000752079	0.999502	7.80531e-10	Monotone	TRUE	TRUE	FALSE	TRUE	TRUE	TRUE	FALSE	TRUE
pcodonCTTCGG	3971	0.0909486	0.0146356	0.000129032	0.496	6.62438e-06	0.508225	270	0.250168	0.0641729	0.004	0.606	0.00129513	0.622788	2.52976e-05	non-significant monotone/non-monotone	TRUE	TRUE	FALSE	FALSE	TRUE	TRUE	FALSE	FALSE
pcodonCTTATT	3971	0.0878995	0.00438649	0.099	0.373	0.0794072	0.394463	1137	0.187062	0.110486	0	1	1.90303e-16	1	9.8594e-31	MIC not significant	FALSE	TRUE	FALSE	FALSE	FALSE	TRUE	FALSE	FALSE
pcodonCTTATC	3971	0.0809961	0.000501311	0.249	0.264	0.252825	0.274606	440	0.254206	0.128027	9.90099e-06	0.999911	2.28804e-10	0.998773	9.79476e-15	MIC not significant	FALSE	TRUE	FALSE	FALSE	FALSE	TRUE	FALSE	FALSE
pcodonCTTATA	3971	0.0872997	0.00883267	0.026	0.611	0.0199416	0.634149	546	0.251964	0.174075	0	1	2.55857e-17	1	2.07843e-24	Monotone	FALSE	TRUE	FALSE	FALSE	TRUE	TRUE	FALSE	TRUE
pcodonCTTATG	3971	0.0922231	0.010201	0.002	0.436	0.00148297	0.453388	867	0.213556	0.108495	0	0.99999	3.26932e-20	0.999531	2.18882e-23	Monotone	TRUE	TRUE	FALSE	TRUE	TRUE	TRUE	FALSE	TRUE
pcodonCTTACT	3971	0.0779244	0.00339542	0.47	0.819	0.484554	0.823089	353	0.270086	0.12275	0	0.966079	5.74357e-10	0.950987	1.2424e-11	MIC not significant	FALSE	TRUE	FALSE	FALSE	FALSE	TRUE	FALSE	FALSE
pcodonCTTACC	3971	0.0687761	5.76263e-06	0.992	0.99	0.987605	0.985197	269	0.244219	0.158924	0.0119901	1	0.00455959	1	1.10927e-11	MIC not significant	FALSE	TRUE	FALSE	FALSE	FALSE	TRUE	FALSE	FALSE
pcodonCTTACA	3971	0.0758554	0.00289367	0.311	0.662	0.317977	0.670733	137	0.293512	0.143304	0.026	0.997	0.0161083	0.99426	5.08607e-06	MIC not significant	FALSE	TRUE	FALSE	FALSE	FALSE	TRUE	FALSE	FALSE
pcodonCTTACG	3971	0.0771662	0.00295537	0.678	0.908	0.689983	0.899159	444	0.329872	0.249845	0	1	1.24379e-33	1	1.93056e-29	MIC not significant	FALSE	TRUE	FALSE	FALSE	FALSE	TRUE	FALSE	FALSE
pcodonCTTAAT	3971	0.0832878	0.00619223	0.033	0.399	0.0229631	0.426015	280	0.280986	0.159819	4.9505e-05	0.99999	2.10924e-07	0.999845	3.612e-12	Monotone	FALSE	TRUE	FALSE	FALSE	FALSE	TRUE	FALSE	FALSE
pcodonCTTAAC	3971	0.0784561	0.00283377	0.271	0.584	0.300413	0.601817	261	0.260054	0.107287	0.011	0.998	0.00200573	0.991214	6.0799e-08	MIC not significant	FALSE	TRUE	FALSE	FALSE	FALSE	TRUE	FALSE	FALSE
pcodonCTTAAA	3971	0.0765604	0.00135721	0.245	0.379	0.249395	0.387309	143	0.302365	0.14675	0.006	0.994	0.00125736	0.985446	2.33334e-06	MIC not significant	FALSE	TRUE	FALSE	FALSE	FALSE	TRUE	FALSE	FALSE
pcodonCTTAAG	3971	0.0837729	0.00258731	0.129	0.313	0.127252	0.322043	534	0.281044	0.197546	0	1	1.14596e-25	1	2.90684e-27	MIC not significant	FALSE	TRUE	FALSE	FALSE	FALSE	TRUE	FALSE	FALSE
pcodonCTTAGT	3971	0.0785924	0.0100689	0.366	0.999	0.374057	0.995446	308	0.245476	0.118073	0.00193069	0.99996	0.000234079	0.999409	5.80622e-10	MIC not significant	FALSE	TRUE	FALSE	FALSE	FALSE	TRUE	FALSE	FALSE
pcodonCTTAGC	3971	0.079006	0.000320407	0.223	0.231	0.218077	0.224201	264	0.32003	0.164054	0	0.99205	1.19957e-10	0.980913	7.62417e-12	MIC not significant	FALSE	TRUE	FALSE	FALSE	FALSE	TRUE	FALSE	FALSE
pcodonCTTAGA	3971	0.0832627	0.00448068	0.047	0.271	0.0339664	0.294646	311	0.274322	0.109573	2.9703e-05	0.838238	4.69724e-08	0.834485	2.18272e-09	non-significant monotone/non-monotone	FALSE	TRUE	FALSE	FALSE	FALSE	TRUE	FALSE	FALSE
pcodonCTTAGG	3971	0.083305	0.000120035	0.112	0.109	0.116058	0.109508	483	0.301379	0.224479	0	1	3.33014e-27	1	2.1345e-28	MIC not significant	FALSE	TRUE	FALSE	FALSE	FALSE	TRUE	FALSE	FALSE
pcodonCTTGTC	3971	0.0741846	0.00169041	0.835	0.935	0.844397	0.924461	327	0.248832	0.0937355	0.001	0.978	6.48873e-05	0.962079	1.59086e-08	MIC not significant	FALSE	TRUE	FALSE	FALSE	FALSE	TRUE	FALSE	FALSE
pcodonCTTGTG	3971	0.0885871	0.0079222	0.007	0.277	0.00255599	0.295187	463	0.221963	0.0946668	0.000168317	0.998871	2.40027e-06	0.994985	1.31086e-11	Monotone	TRUE	TRUE	FALSE	TRUE	TRUE	TRUE	FALSE	TRUE
pcodonCTTGCT	3971	0.0843397	0.0111614	0.039	0.931	0.0295934	0.919708	370	0.272301	0.0982758	0	0.509277	2.91978e-10	0.536924	7.01278e-10	non-significant monotone/non-monotone	FALSE	TRUE	FALSE	FALSE	FALSE	TRUE	FALSE	FALSE
pcodonCTTGCC	3971	0.0751123	0.0015547	0.567	0.716	0.589847	0.734744	233	0.271899	0.126366	0.001	0.999	0.000720886	0.997093	2.40085e-08	MIC not significant	FALSE	TRUE	FALSE	FALSE	FALSE	TRUE	FALSE	FALSE
pcodonCTTGCA	3971	0.07851	0.00613104	0.167	0.786	0.172712	0.801115	201	0.221585	0.0229627	0.399	0.706	0.431721	0.71816	0.0317621	MIC not significant	FALSE	FALSE	FALSE	FALSE	FALSE	FALSE	FALSE	FALSE
pcodonCTTGCG	3971	0.077884	0.00296909	0.609	0.868	0.623155	0.866845	444	0.248718	0.0973767	0	0.873406	1.18976e-09	0.86681	1.75009e-11	MIC not significant	FALSE	TRUE	FALSE	FALSE	FALSE	TRUE	FALSE	FALSE
pcodonCTTGAC	3971	0.0794272	0.00676959	0.037	0.742	0.0321179	0.766456	91	0.314853	0.0823408	0.081	0.572	0.0664384	0.619453	0.00582014	MIC not significant	FALSE	FALSE	FALSE	FALSE	FALSE	FALSE	FALSE	FALSE
pcodonCTTGAA	3971	0.077835	0.00138223	0.38	0.518	0.403538	0.534614	299	0.282063	0.129463	1.9802e-05	0.989287	9.34212e-08	0.977116	1.43961e-10	MIC not significant	FALSE	TRUE	FALSE	FALSE	FALSE	TRUE	FALSE	FALSE
pcodonCTTGAG	3971	0.0752834	0.000904697	0.464	0.549	0.478262	0.559344	174	0.281993	0.175719	0.0252772	1	0.0139631	0.999997	8.56264e-09	MIC not significant	FALSE	TRUE	FALSE	FALSE	FALSE	TRUE	FALSE	FALSE
pcodonCTTGGT	3971	0.0919939	0.00510981	0.00103226	0.0330968	0.000476261	0.0285606	628	0.248943	0.139993	0	1	1.69765e-21	0.999851	2.66309e-22	Monotone	TRUE	TRUE	FALSE	TRUE	TRUE	TRUE	FALSE	TRUE
pcodonCTTGGC	3971	0.0763663	0.000799333	0.726	0.781	0.739157	0.790449	382	0.234046	0.0894418	0.000366337	0.976208	1.87319e-05	0.962628	2.47492e-09	MIC not significant	FALSE	TRUE	FALSE	FALSE	FALSE	TRUE	FALSE	FALSE
pcodonCTTGGA	3971	0.0840417	0.000623613	0.178	0.202	0.181597	0.209315	686	0.216613	0.14061	0	1	9.66434e-12	1	2.50958e-24	MIC not significant	FALSE	TRUE	FALSE	FALSE	FALSE	TRUE	FALSE	FALSE
pcodonCTTGGG	3971	0.0872529	0.00482842	0.016	0.2	0.0147065	0.210038	574	0.211249	0.115396	5.94059e-05	1	2.56615e-07	1	5.70799e-17	Monotone	TRUE	TRUE	FALSE	TRUE	TRUE	TRUE	FALSE	TRUE
pcodonCTCTTT	3971	0.0773237	0.00688641	0.433	0.978	0.452668	0.971918	286	0.257781	0.0928604	0.000683168	0.858465	2.99195e-05	0.851104	1.4688e-07	MIC not significant	FALSE	TRUE	FALSE	FALSE	FALSE	TRUE	FALSE	FALSE
pcodonCTCTTC	3971	0.073574	0.00273534	0.723	0.926	0.722432	0.92067	186	0.409586	0.21045	0	0.635802	1.41876e-16	0.658892	4.54904e-11	MIC not significant	FALSE	TRUE	FALSE	FALSE	FALSE	TRUE	FALSE	FALSE
pcodonCTCTTA	3971	0.0828345	0.00100786	0.028	0.046	0.0275533	0.0446832	270	0.330529	0.195394	0	0.999891	1.78662e-13	0.998792	2.41987e-14	Monotone	FALSE	TRUE	FALSE	FALSE	FALSE	TRUE	FALSE	FALSE
pcodonCTCTTG	3971	0.0871963	0.0149597	0.002	0.904	0.000545698	0.902495	271	0.283543	0.142611	0.000158416	0.999426	9.91869e-07	0.9967	1.29677e-10	Monotone	TRUE	TRUE	FALSE	TRUE	TRUE	TRUE	FALSE	TRUE
pcodonCTCTCT	3971	0.0805793	0.00645867	0.024	0.512	0.0179998	0.519936	131	0.339454	0.145219	0.007	0.911	0.000509434	0.893385	7.10753e-06	non-significant monotone/non-monotone	FALSE	TRUE	FALSE	FALSE	TRUE	TRUE	FALSE	FALSE
pcodonCTCTCC	3971	0.0821032	6.00485e-09	0.003	0.003	0.00176659	0.00116691	82	0.311085	0.0228672	0.196	0.255	0.195596	0.271916	0.175056	MIC not significant	TRUE	FALSE	FALSE	FALSE	TRUE	FALSE	FALSE	FALSE
pcodonCTCTCA	3971	0.0785573	0.0059433	0.042	0.981	0.0278546	0.956144	44	0.213739	0.00193418	0.773	0.628	0.783617	0.666135	0.776821	MIC not significant	FALSE	FALSE	FALSE	FALSE	FALSE	FALSE	FALSE	FALSE
pcodonCTCTCG	3971	0.0752364	1.72568e-06	0.388	0.357	0.394143	0.358448	131	0.358422	0.252169	0.00105941	1	3.37854e-05	0.999981	9.90675e-10	MIC not significant	FALSE	TRUE	FALSE	FALSE	FALSE	TRUE	FALSE	FALSE
pcodonCTCTAT	3971	0.0722864	5.94853e-05	0.793	0.784	0.798568	0.783134	165	0.315593	0.164588	0.001	0.999	4.77248e-05	0.991757	6.44815e-08	MIC not significant	FALSE	TRUE	FALSE	FALSE	FALSE	TRUE	FALSE	FALSE
pcodonCTCTAC	3971	0.0807223	0.00435944	0.011	0.252	0.00790831	0.258324	71	0.275819	0.111147	0.386	0.992	0.425829	0.977356	0.00449629	MIC not significant	TRUE	FALSE	FALSE	FALSE	TRUE	FALSE	FALSE	FALSE
pcodonCTCTAA	3971	0.0744004	0.00365015	0.591	0.973	0.60815	0.963496	71	0.504172	0.19965	0.001	0.13	1.03195e-07	0.129521	9.3788e-05	MIC not significant	FALSE	TRUE	FALSE	FALSE	FALSE	TRUE	FALSE	FALSE
pcodonCTCTAG	3971	0.0791425	0.00745755	0.057	0.834	0.0487874	0.829874	108	0.393201	0.232619	0.001	0.998	4.2095e-05	0.99006	1.25349e-07	MIC not significant	FALSE	TRUE	FALSE	FALSE	FALSE	TRUE	FALSE	FALSE
pcodonCTCTGT	3971	0.0805969	0.00916977	0.018	0.829	0.0182727	0.837586	131	0.310718	0.110348	0.022	0.861	0.00895063	0.85001	0.00010607	non-significant monotone/non-monotone	TRUE	TRUE	FALSE	FALSE	TRUE	TRUE	FALSE	FALSE
pcodonCTCTGC	3971	0.071902	2.25921e-05	0.844	0.828	0.83712	0.818621	143	0.271307	0.154208	0.0502475	1	0.036915	0.999794	1.22823e-06	MIC not significant	FALSE	FALSE	FALSE	FALSE	FALSE	FALSE	FALSE	FALSE
pcodonCTCTGA	3971	0.0738137	0.00113605	0.604	0.708	0.617593	0.722236	138	0.261708	0.154398	0.12602	0.99999	0.12581	0.999968	1.86863e-06	MIC not significant	FALSE	FALSE	FALSE	FALSE	FALSE	FALSE	FALSE	FALSE
pcodonCTCTGG	3971	0.0818646	0.00130432	0.049	0.083	0.0399933	0.0760282	238	0.311041	0.167402	7.92079e-05	0.999545	6.01239e-08	0.996596	5.07993e-11	Monotone	FALSE	TRUE	FALSE	FALSE	FALSE	TRUE	FALSE	FALSE
pcodonCTCCTT	3971	0.0800871	0.00615425	0.076	0.648	0.0718655	0.65694	193	0.320807	0.177488	0.000108911	0.999238	4.96281e-07	0.995494	1.05315e-09	MIC not significant	FALSE	TRUE	FALSE	FALSE	FALSE	TRUE	FALSE	FALSE
pcodonCTCCTC	3971	0.076467	0.00240648	0.224	0.531	0.237735	0.538409	107	0.313164	0.0821389	0.047	0.573	0.0300728	0.609784	0.00276406	MIC not significant	FALSE	FALSE	FALSE	FALSE	FALSE	TRUE	FALSE	FALSE
pcodonCTCCTA	3971	0.0746286	0.00174185	0.501	0.715	0.505714	0.723162	93	0.261946	0.13918	0.339129	0.999921	0.375019	0.999284	0.000230522	MIC not significant	FALSE	FALSE	FALSE	FALSE	FALSE	FALSE	FALSE	FALSE
pcodonCTCCTG	3971	0.0787995	0.0040106	0.088	0.454	0.0893339	0.459548	152	0.294448	0.0799718	0.022	0.629	0.0112655	0.64888	0.000415466	MIC not significant	FALSE	TRUE	FALSE	FALSE	FALSE	TRUE	FALSE	FALSE
pcodonCTCCCT	3971	0.0740197	0.000198521	0.55	0.539	0.569941	0.561183	117	0.322189	0.241229	0.010198	1	0.00287224	0.999998	1.88283e-08	MIC not significant	FALSE	TRUE	FALSE	FALSE	FALSE	TRUE	FALSE	FALSE
pcodonCTCCCC	3971	0.0747097	0.00320813	0.644	0.997	0.68294	0.98555	49	0.422399	0.099745	0.032	0.195	0.0147524	0.220581	0.0270622	MIC not significant	FALSE	TRUE	FALSE	FALSE	FALSE	TRUE	FALSE	FALSE
pcodonCTCCCG	3971	0.075505	0.0018452	0.363	0.608	0.371299	0.624723	100	0.374549	0.126254	0.001	0.254	2.49127e-05	0.257442	0.000285982	MIC not significant	FALSE	TRUE	FALSE	FALSE	FALSE	TRUE	FALSE	FALSE
pcodonCTCCAG	3971	0.0752172	5.70488e-05	0.523	0.491	0.544561	0.507018	54	0.364739	0.173451	0.062	0.93	0.051664	0.909318	0.00173328	MIC not significant	FALSE	FALSE	FALSE	FALSE	FALSE	FALSE	FALSE	FALSE
pcodonCTCCGT	3971	0.0789466	0.00171273	0.054	0.147	0.0418917	0.135326	73	0.258349	0.0934379	0.482	0.988	0.525856	0.972624	0.00854122	MIC not significant	FALSE	FALSE	FALSE	FALSE	FALSE	FALSE	FALSE	FALSE
pcodonCTCCGA	3971	0.0767116	0.00129692	0.236	0.413	0.260517	0.446882	60	0.377486	0.163666	0.022	0.7	0.00662569	0.719673	0.00146435	MIC not significant	FALSE	TRUE	FALSE	FALSE	FALSE	TRUE	FALSE	FALSE
pcodonCTCCGG	3971	0.0800025	0.00792338	0.021	0.905	0.0124931	0.893954	72	0.357274	0.145278	0.026	0.797	0.0157353	0.804089	0.000955786	non-significant monotone/non-monotone	FALSE	TRUE	FALSE	FALSE	TRUE	TRUE	FALSE	FALSE
pcodonCTCATT	3971	0.0766567	0.00129819	0.534	0.649	0.537021	0.659359	287	0.259698	0.111129	0.001	0.984	2.30744e-05	0.972483	7.06921e-09	MIC not significant	FALSE	TRUE	FALSE	FALSE	FALSE	TRUE	FALSE	FALSE
pcodonCTCATC	3971	0.073591	0.000364749	0.619	0.635	0.641113	0.655368	147	0.249972	0.0925437	0.116	0.993	0.117105	0.979602	0.000179645	MIC not significant	FALSE	FALSE	FALSE	FALSE	FALSE	FALSE	FALSE	FALSE
pcodonCTCATA	3971	0.0776543	0.00627239	0.127	0.848	0.120571	0.844079	126	0.286645	0.059049	0.1	0.604	0.104636	0.6496	0.00611214	MIC not significant	FALSE	FALSE	FALSE	FALSE	FALSE	FALSE	FALSE	FALSE
pcodonCTCATG	3971	0.0792984	0.00342213	0.203	0.556	0.20027	0.550097	258	0.218669	0.0545942	0.079	0.881	0.0640682	0.877202	0.000152249	MIC not significant	FALSE	FALSE	FALSE	FALSE	FALSE	FALSE	FALSE	FALSE
pcodonCTCACT	3971	0.0769897	0.000865625	0.187	0.259	0.196624	0.267601	87	0.353035	0.201326	0.0227822	0.99905	0.0104486	0.994304	1.30842e-05	MIC not significant	FALSE	TRUE	FALSE	FALSE	FALSE	TRUE	FALSE	FALSE
pcodonCTCACC	3971	0.0752112	0.00027356	0.459	0.455	0.470481	0.469507	75	0.284468	0.0936926	0.242	0.924	0.270241	0.896906	0.00756826	MIC not significant	FALSE	FALSE	FALSE	FALSE	FALSE	FALSE	FALSE	FALSE
pcodonCTCACG	3971	0.0737914	0.000317348	0.6	0.608	0.608485	0.617615	113	0.311306	0.0835164	0.016	0.529	0.0109262	0.554247	0.00190672	MIC not significant	FALSE	TRUE	FALSE	FALSE	FALSE	TRUE	FALSE	FALSE
pcodonCTCAAT	3971	0.0779871	0.00552902	0.101	0.853	0.10131	0.841326	72	0.260501	0.0887153	0.506	0.982	0.555712	0.96689	0.0110512	MIC not significant	FALSE	FALSE	FALSE	FALSE	FALSE	FALSE	FALSE	FALSE
pcodonCTCAAC	3971	0.0762527	0.000101521	0.29	0.274	0.308508	0.286002	64	0.3173	0.0834121	0.245	0.804	0.272091	0.794733	0.0206395	MIC not significant	FALSE	FALSE	FALSE	FALSE	FALSE	FALSE	FALSE	FALSE
pcodonCTCAAG	3971	0.0836942	0.00351758	0.007	0.049	0.00304703	0.0448557	190	0.345894	0.228949	0	1	3.11196e-09	0.999929	2.90309e-12	Monotone	TRUE	TRUE	FALSE	TRUE	TRUE	TRUE	FALSE	TRUE
pcodonCTCAGT	3971	0.0764293	0.00498204	0.246	0.942	0.261744	0.930359	72	0.322181	0.0446347	0.095	0.227	0.0809892	0.252118	0.0748353	MIC not significant	FALSE	FALSE	FALSE	FALSE	FALSE	FALSE	FALSE	FALSE
pcodonCTCAGC	3971	0.0787122	3.3828e-08	0.073	0.063	0.0560961	0.0445193	87	0.281517	0.0730948	0.336	0.886	0.367088	0.875912	0.0113209	MIC not significant	FALSE	FALSE	FALSE	FALSE	FALSE	FALSE	FALSE	FALSE
pcodonCTCAGA	3971	0.0729809	0.000762426	0.838	0.901	0.841782	0.893215	66	0.300162	0.0115084	0.305	0.27	0.34631	0.306454	0.391252	MIC not significant	FALSE	FALSE	FALSE	FALSE	FALSE	FALSE	FALSE	FALSE
pcodonCTCAGG	3971	0.0800991	0.00038366	0.061	0.061	0.0508301	0.0557674	186	0.249022	0.134812	0.0798119	1	0.071105	0.999967	2.53715e-07	MIC not significant	FALSE	FALSE	FALSE	FALSE	FALSE	FALSE	FALSE	FALSE
pcodonCTCGTC	3971	0.0712641	3.81061e-05	0.895	0.877	0.893401	0.878181	110	0.3367	0.143349	0.015	0.931	0.00460876	0.914052	4.53293e-05	MIC not significant	FALSE	TRUE	FALSE	FALSE	FALSE	TRUE	FALSE	FALSE
pcodonCTCGTG	3971	0.0795654	0.00682994	0.065	0.716	0.0559753	0.726736	155	0.285389	0.0476294	0.036	0.267	0.0208224	0.286829	0.00637086	MIC not significant	FALSE	FALSE	FALSE	FALSE	FALSE	TRUE	FALSE	FALSE
pcodonCTCGCT	3971	0.082801	0.00740205	0.005	0.327	0.0025575	0.348848	146	0.344952	0.20935	0.000277228	0.999713	1.75483e-06	0.997225	6.39507e-09	Monotone	TRUE	TRUE	FALSE	TRUE	TRUE	TRUE	FALSE	TRUE
pcodonCTCGCC	3971	0.0758634	3.07119e-05	0.312	0.293	0.332015	0.302997	120	0.320772	0.103022	0.009	0.506	0.00167981	0.548617	0.000351153	MIC not significant	FALSE	TRUE	FALSE	FALSE	FALSE	TRUE	FALSE	FALSE
pcodonCTCGCA	3971	0.0782539	0.000741205	0.107	0.14	0.0977443	0.137755	65	0.329269	0.0874633	0.194	0.712	0.216605	0.733629	0.0167635	MIC not significant	FALSE	FALSE	FALSE	FALSE	FALSE	FALSE	FALSE	FALSE
pcodonCTCGCG	3971	0.0782928	1.24905e-05	0.136	0.123	0.135683	0.119357	168	0.264665	0.17677	0.0353267	1	0.0224975	0.999999	1.39463e-08	MIC not significant	FALSE	FALSE	FALSE	FALSE	FALSE	TRUE	FALSE	FALSE
pcodonCTCGAC	3971	0.0765693	0.0015081	0.191	0.485	0.186946	0.5261	41	0.338259	0.274644	0.167	0.999	0.175019	0.999135	0.000436899	MIC not significant	FALSE	FALSE	FALSE	FALSE	FALSE	FALSE	FALSE	FALSE
pcodonCTCGAA	3971	0.0781304	0.00129373	0.083	0.152	0.0861275	0.1655	100	0.344786	0.0461385	0.005	0.029	0.000682409	0.016333	0.0318651	MIC not significant	FALSE	TRUE	FALSE	FALSE	FALSE	TRUE	FALSE	FALSE
pcodonCTCGAG	3971	0.0741702	0.000569739	0.589	0.658	0.628011	0.678279	74	0.556873	0.338949	0	0.714594	8.76033e-13	0.729037	5.30099e-08	MIC not significant	FALSE	TRUE	FALSE	FALSE	FALSE	TRUE	FALSE	FALSE
pcodonCTCGGT	3971	0.0784659	0.0027603	0.123	0.367	0.133809	0.377696	165	0.271249	0.115257	0.029	0.997	0.019941	0.986013	8.15922e-06	MIC not significant	FALSE	TRUE	FALSE	FALSE	FALSE	TRUE	FALSE	FALSE
pcodonCTCGGC	3971	0.0727466	0.000128904	0.714	0.688	0.725822	0.712256	127	0.26951	0.075768	0.192	0.934	0.197024	0.922081	0.00173569	MIC not significant	FALSE	FALSE	FALSE	FALSE	FALSE	FALSE	FALSE	FALSE
pcodonCTCGGA	3971	0.0804436	0.00105845	0.069	0.109	0.0596471	0.095325	208	0.20699	0.0479435	0.55	0.995	0.574785	0.98194	0.00148549	MIC not significant	FALSE	FALSE	FALSE	FALSE	FALSE	FALSE	FALSE	FALSE
pcodonCTCGGG	3971	0.0755369	0.00497299	0.405	0.904	0.411676	0.90172	157	0.276087	0.110689	0.039	0.992	0.0288767	0.975833	2.06888e-05	MIC not significant	FALSE	FALSE	FALSE	FALSE	FALSE	TRUE	FALSE	FALSE
pcodonCTATTT	3971	0.0970767	0.0191417	0	0.599723	7.89362e-08	0.609666	472	0.26006	0.124347	0	0.996089	5.3869e-13	0.989124	2.88484e-15	Monotone	TRUE	TRUE	FALSE	TRUE	TRUE	TRUE	FALSE	TRUE
pcodonCTATTC	3971	0.0875652	0.013876	0.001	0.794	0.000272798	0.785967	256	0.252926	0.118173	0.00390099	0.999644	0.000630578	0.997409	1.63944e-08	Monotone	TRUE	TRUE	FALSE	TRUE	TRUE	TRUE	FALSE	TRUE
pcodonCTATTA	3971	0.0802424	0.00728769	0.148	0.856	0.150562	0.844942	272	0.366712	0.187751	0	0.724792	1.03982e-20	0.736371	7.08695e-14	MIC not significant	FALSE	TRUE	FALSE	FALSE	FALSE	TRUE	FALSE	FALSE
pcodonCTATTG	3971	0.0993393	0.020862	0	0.432772	1.96525e-10	0.445723	389	0.220124	0.0633035	0.004	0.778	0.000404378	0.791705	4.96918e-07	non-significant monotone/non-monotone	TRUE	TRUE	FALSE	FALSE	TRUE	TRUE	FALSE	FALSE
pcodonCTATCT	3971	0.0723902	0.00291077	0.762	0.958	0.774698	0.950827	142	0.270974	0.0487443	0.055	0.41	0.0484421	0.443321	0.00828274	MIC not significant	FALSE	FALSE	FALSE	FALSE	FALSE	FALSE	FALSE	FALSE
pcodonCTATCC	3971	0.0774725	0.000174357	0.149	0.137	0.141417	0.132133	92	0.336961	0.0771035	0.027	0.257	0.0123461	0.295396	0.00736508	MIC not significant	FALSE	TRUE	FALSE	FALSE	FALSE	TRUE	FALSE	FALSE
pcodonCTATCA	3971	0.0787273	0.00286645	0.074	0.283	0.0556011	0.317022	74	0.296729	0.192715	0.181851	1	0.195723	0.999668	0.000107175	MIC not significant	FALSE	FALSE	FALSE	FALSE	FALSE	FALSE	FALSE	FALSE
pcodonCTATCG	3971	0.0743536	0.00322666	0.543	0.884	0.556511	0.881229	142	0.337458	0.178147	0.001	0.99	1.72905e-05	0.979049	1.67955e-07	MIC not significant	FALSE	TRUE	FALSE	FALSE	FALSE	TRUE	FALSE	FALSE
pcodonCTATAT	3971	0.0821125	0.0110962	0.029	0.907	0.0244511	0.914179	214	0.247407	0.0832178	0.05	0.978	0.0301042	0.961844	1.81269e-05	MIC not significant	FALSE	FALSE	FALSE	FALSE	FALSE	TRUE	FALSE	FALSE
pcodonCTATAC	3971	0.0812654	0.00478845	0.007	0.208	0.00537746	0.208976	111	0.460231	0.309632	0	0.999248	4.19655e-11	0.995385	2.28232e-10	Monotone	TRUE	TRUE	FALSE	TRUE	TRUE	TRUE	FALSE	TRUE
pcodonCTATAA	3971	0.0775541	0.00761667	0.134	0.968	0.140112	0.960449	102	0.288043	0.0739371	0.214	0.866	0.226699	0.855264	0.00569852	MIC not significant	FALSE	FALSE	FALSE	FALSE	FALSE	FALSE	FALSE	FALSE
pcodonCTATAG	3971	0.075101	0.0053501	0.418	0.961	0.433773	0.948314	141	0.356375	0.175583	0.000217822	0.923743	1.40393e-06	0.904623	2.32368e-07	MIC not significant	FALSE	TRUE	FALSE	FALSE	FALSE	TRUE	FALSE	FALSE
pcodonCTATGT	3971	0.0859295	0.0101419	0.001	0.434	0.000655654	0.446804	206	0.3461	0.170395	9.90099e-06	0.939584	1.32566e-09	0.92258	7.01487e-10	non-significant monotone/non-monotone	TRUE	TRUE	FALSE	FALSE	TRUE	TRUE	FALSE	FALSE
pcodonCTATGC	3971	0.0779468	0.00324105	0.134	0.427	0.126059	0.445187	147	0.261954	0.132391	0.0643762	0.999822	0.0523154	0.998772	5.89474e-06	MIC not significant	FALSE	FALSE	FALSE	FALSE	FALSE	FALSE	FALSE	FALSE
pcodonCTATGA	3971	0.0870532	0.00711001	0.000354839	0.0720645	0.000139649	0.0670828	202	0.288369	0.165466	0.00409901	1	0.000738042	0.999944	1.88659e-09	Monotone	TRUE	TRUE	FALSE	TRUE	TRUE	TRUE	FALSE	TRUE
pcodonCTATGG	3971	0.0855266	0.0072223	0.006	0.289	0.00389746	0.296179	281	0.282849	0.115047	1.9802e-05	0.839525	8.79393e-08	0.834707	5.40118e-09	non-significant monotone/non-monotone	TRUE	TRUE	FALSE	FALSE	TRUE	TRUE	FALSE	FALSE
pcodonCTACTT	3971	0.0860572	0.0130211	0.033	0.967	0.0254216	0.959959	494	0.228502	0.093137	1.9802e-05	0.984663	3.59418e-08	0.973137	4.15191e-12	Monotone	FALSE	TRUE	FALSE	FALSE	FALSE	TRUE	FALSE	FALSE
pcodonCTACTC	3971	0.0800168	0.00630891	0.028	0.562	0.0199149	0.587607	105	0.385988	0.137138	0.002	0.459	9.45753e-05	0.485814	0.000100896	non-significant monotone/non-monotone	FALSE	TRUE	FALSE	FALSE	TRUE	TRUE	FALSE	FALSE
pcodonCTACTA	3971	0.0912102	0.0170253	6.45161e-05	0.849871	3.22869e-05	0.849318	356	0.228666	0.0690957	0.001	0.789	0.000428686	0.805661	4.88067e-07	non-significant monotone/non-monotone	TRUE	TRUE	FALSE	FALSE	TRUE	TRUE	FALSE	FALSE
pcodonCTACTG	3971	0.0811899	0.012224	0.049	0.985	0.0460679	0.9724	207	0.26529	0.0986221	0.014	0.978	0.00705058	0.968617	4.06515e-06	Monotone	FALSE	TRUE	FALSE	FALSE	FALSE	TRUE	FALSE	FALSE
pcodonCTACCT	3971	0.0806618	0.00568111	0.049	0.483	0.0437384	0.496355	190	0.287538	0.143164	0.00332673	0.999366	0.000448389	0.995501	7.34518e-08	Monotone	FALSE	TRUE	FALSE	FALSE	FALSE	TRUE	FALSE	FALSE
pcodonCTACCC	3971	0.0765963	0.0057594	0.228	0.967	0.225472	0.944299	77	0.24955	0.0158876	0.486	0.514	0.535393	0.559275	0.274692	MIC not significant	FALSE	FALSE	FALSE	FALSE	FALSE	FALSE	FALSE	FALSE
pcodonCTACCA	3971	0.075591	0.00747724	0.384	1	0.405947	0.997003	83	0.277939	0.0912581	0.426	0.983	0.473815	0.964986	0.00551013	MIC not significant	FALSE	FALSE	FALSE	FALSE	FALSE	FALSE	FALSE	FALSE
pcodonCTACCG	3971	0.073345	0.00178927	0.67	0.84	0.680827	0.840219	155	0.297432	0.0820355	0.014	0.582	0.00579933	0.619795	0.000302661	MIC not significant	FALSE	TRUE	FALSE	FALSE	FALSE	TRUE	FALSE	FALSE
pcodonCTACAT	3971	0.07953	0.00428264	0.026	0.462	0.0223384	0.487398	56	0.277317	0.0796914	0.406	0.897	0.460835	0.8801	0.0353859	MIC not significant	FALSE	FALSE	FALSE	FALSE	FALSE	FALSE	FALSE	FALSE
pcodonCTACAC	3971	0.0799562	0.00533273	0.006	0.603	0.00107492	0.640781	42	0.247288	0.0971299	0.607	0.972	0.651668	0.9545	0.0445199	MIC not significant	TRUE	FALSE	FALSE	FALSE	TRUE	FALSE	FALSE	FALSE
pcodonCTACAA	3971	0.0776909	0.00392904	0.1	0.826	0.0964703	0.830832	46	0.296585	0.0351534	0.163	0.232	0.174803	0.239209	0.212127	MIC not significant	FALSE	FALSE	FALSE	FALSE	FALSE	FALSE	FALSE	FALSE
pcodonCTACAG	3971	0.074672	0.00411841	0.472	0.937	0.482378	0.925804	108	0.193026	0.0122804	0.98	0.987	0.958457	0.965209	0.253553	MIC not significant	FALSE	FALSE	FALSE	FALSE	FALSE	FALSE	FALSE	FALSE
pcodonCTACGT	3971	0.0753002	0.00321717	0.482	0.826	0.496552	0.8242	199	0.278393	0.177598	0.0030297	1	0.000413932	0.999995	5.6969e-10	MIC not significant	FALSE	TRUE	FALSE	FALSE	FALSE	TRUE	FALSE	FALSE
pcodonCTACGC	3971	0.0773807	0.00493907	0.141	0.779	0.142924	0.795193	91	0.280087	0.1521	0.226832	0.999871	0.251555	0.998966	0.000132689	MIC not significant	FALSE	FALSE	FALSE	FALSE	FALSE	FALSE	FALSE	FALSE
pcodonCTACGA	3971	0.0813921	0.00934088	0.034	0.809	0.02404	0.812576	189	0.295401	0.139479	0.004	0.995	0.000196491	0.985494	1.20282e-07	Monotone	FALSE	TRUE	FALSE	FALSE	FALSE	TRUE	FALSE	FALSE
pcodonCTACGG	3971	0.0840527	0.00621757	0.008	0.171	0.00241842	0.175588	192	0.306491	0.200714	0.00060396	1	1.33197e-05	0.999989	7.22516e-11	Monotone	TRUE	TRUE	FALSE	TRUE	TRUE	TRUE	FALSE	TRUE
pcodonCTAATT	3971	0.0948267	0.0160235	2.94118e-05	0.522569	3.29646e-06	0.534193	493	0.232064	0.113667	9.90099e-06	0.99997	8.14587e-09	0.999522	1.43471e-14	Monotone	TRUE	TRUE	FALSE	TRUE	TRUE	TRUE	FALSE	TRUE
pcodonCTAATC	3971	0.0809071	0.00786188	0.079	0.813	0.0734668	0.814305	239	0.307168	0.119979	5.94059e-05	0.686366	1.09237e-07	0.703497	3.84199e-08	MIC not significant	FALSE	TRUE	FALSE	FALSE	FALSE	TRUE	FALSE	FALSE
pcodonCTAATA	3971	0.0851054	0.00912536	0.009	0.516	0.00553348	0.532614	261	0.267666	0.117285	0.00239604	0.99804	0.000290793	0.992525	1.356e-08	Monotone	TRUE	TRUE	FALSE	TRUE	TRUE	TRUE	FALSE	TRUE
pcodonCTAATG	3971	0.0875013	0.010225	0.01	0.613	0.00526317	0.628899	408	0.228333	0.0901358	0.000732673	0.995109	4.48214e-05	0.987643	6.05414e-10	Monotone	TRUE	TRUE	FALSE	TRUE	TRUE	TRUE	FALSE	TRUE
pcodonCTAACT	3971	0.0748056	0.00492381	0.544	0.959	0.572308	0.946515	201	0.328589	0.157034	9.90099e-05	0.978703	6.19612e-07	0.963517	5.76973e-09	MIC not significant	FALSE	TRUE	FALSE	FALSE	FALSE	TRUE	FALSE	FALSE
pcodonCTAACC	3971	0.0698171	0.000621054	0.963	0.975	0.946555	0.959235	120	0.268823	0.123751	0.119	0.999	0.12063	0.992479	8.14972e-05	MIC not significant	FALSE	FALSE	FALSE	FALSE	FALSE	FALSE	FALSE	FALSE
pcodonCTAACA	3971	0.0800407	0.00704393	0.03	0.689	0.0199051	0.706257	94	0.288847	0.10678	0.155	0.966	0.153957	0.940883	0.00130667	MIC not significant	FALSE	FALSE	FALSE	FALSE	TRUE	FALSE	FALSE	FALSE
pcodonCTAACG	3971	0.0753476	0.00258939	0.467	0.741	0.475072	0.75318	195	0.256119	0.0989878	0.026	0.994	0.0140397	0.975888	7.48133e-06	MIC not significant	FALSE	TRUE	FALSE	FALSE	FALSE	TRUE	FALSE	FALSE
pcodonCTAAAT	3971	0.0878067	0.0106846	1.9802e-05	0.165762	2.3511e-06	0.166512	133	0.331983	0.13975	0.004	0.9	0.000718159	0.88619	9.32211e-06	non-significant monotone/non-monotone	TRUE	TRUE	FALSE	FALSE	TRUE	TRUE	FALSE	FALSE
pcodonCTAAAC	3971	0.0824808	0.00469888	0.004	0.111	0.00222053	0.103516	119	0.32899	0.14307	0.012	0.912	0.00164413	0.884619	2.22219e-05	non-significant monotone/non-monotone	TRUE	TRUE	FALSE	FALSE	TRUE	TRUE	FALSE	FALSE
pcodonCTAAAA	3971	0.0727798	0.0015857	0.939	0.997	0.922321	0.984453	54	0.416195	0.143466	0.018	0.371	0.00465978	0.409693	0.00499499	MIC not significant	FALSE	TRUE	FALSE	FALSE	FALSE	TRUE	FALSE	FALSE
pcodonCTAAAG	3971	0.0782084	0.00103253	0.127	0.184	0.130934	0.191191	150	0.422937	0.23476	0	0.941208	4.70036e-12	0.923336	3.33292e-10	MIC not significant	FALSE	TRUE	FALSE	FALSE	FALSE	TRUE	FALSE	FALSE
pcodonCTAAGT	3971	0.084904	0.0129105	0.000806452	0.788548	0.000186213	0.792418	134	0.266879	0.0824026	0.131	0.944	0.137501	0.923837	0.000771352	MIC not significant	TRUE	FALSE	FALSE	FALSE	TRUE	FALSE	FALSE	FALSE
pcodonCTAAGC	3971	0.0785391	1.48112e-05	0.087	0.073	0.0839439	0.0708851	121	0.32152	0.206195	0.00646535	0.99997	0.0012587	0.999697	1.68352e-07	MIC not significant	FALSE	TRUE	FALSE	FALSE	FALSE	TRUE	FALSE	FALSE
pcodonCTAAGA	3971	0.0768484	0.00187545	0.193	0.385	0.20246	0.397446	117	0.49685	0.267131	0	0.427842	1.11378e-16	0.465377	2.43582e-09	MIC not significant	FALSE	TRUE	FALSE	FALSE	FALSE	TRUE	FALSE	FALSE
pcodonCTAAGG	3971	0.0834121	0.00524847	0.009	0.184	0.0065909	0.178372	204	0.274967	0.090695	0.015	0.904	0.00427897	0.878587	1.20333e-05	non-significant monotone/non-monotone	TRUE	TRUE	FALSE	FALSE	TRUE	TRUE	FALSE	FALSE
pcodonCTAGTC	3971	0.0803741	0.00409674	0.076	0.397	0.0742313	0.396235	223	0.268868	0.136713	0.00345545	0.999861	0.00049653	0.998845	1.24448e-08	MIC not significant	FALSE	TRUE	FALSE	FALSE	FALSE	TRUE	FALSE	FALSE
pcodonCTAGTG	3971	0.0917912	0.00737237	9.90099e-06	0.0140198	4.5695e-06	0.0107417	296	0.263535	0.105705	0.002	0.982	2.26387e-05	0.959691	1.02654e-08	Monotone	TRUE	TRUE	FALSE	TRUE	TRUE	TRUE	FALSE	FALSE
pcodonCTAGCT	3971	0.0846517	0.0107613	0.00216129	0.609355	0.00116816	0.620371	182	0.306137	0.100005	0.002	0.625	9.33628e-05	0.635178	1.36758e-05	non-significant monotone/non-monotone	TRUE	TRUE	FALSE	FALSE	TRUE	TRUE	FALSE	FALSE
pcodonCTAGCC	3971	0.0706992	0.00133478	0.932	0.981	0.926748	0.969404	104	0.316892	0.102424	0.061	0.843	0.0436687	0.830086	0.000926751	MIC not significant	FALSE	FALSE	FALSE	FALSE	FALSE	FALSE	FALSE	FALSE
pcodonCTAGCA	3971	0.0766746	0.0042472	0.228	0.762	0.223921	0.773074	101	0.282034	0.0909054	0.084	0.835	0.0794184	0.821838	0.00218392	MIC not significant	FALSE	FALSE	FALSE	FALSE	FALSE	FALSE	FALSE	FALSE
pcodonCTAGCG	3971	0.0739704	0.00162359	0.649	0.788	0.668409	0.804005	192	0.263193	0.0711312	0.023	0.691	0.0109945	0.703413	0.000184466	MIC not significant	FALSE	TRUE	FALSE	FALSE	FALSE	TRUE	FALSE	FALSE
pcodonCTAGAC	3971	0.0798327	0.00765035	0.019	0.956	0.00996094	0.934982	56	0.424396	0.13913	0.007	0.227	0.00107312	0.250007	0.00488023	non-significant monotone/non-monotone	TRUE	TRUE	FALSE	FALSE	TRUE	TRUE	FALSE	FALSE
pcodonCTAGAA	3971	0.0768418	0.00194585	0.211	0.394	0.206219	0.423811	100	0.279063	0.0896718	0.106	0.859	0.105594	0.847879	0.00247279	MIC not significant	FALSE	FALSE	FALSE	FALSE	FALSE	FALSE	FALSE	FALSE
pcodonCTAGAG	3971	0.0737518	0.00205122	0.717	0.927	0.72558	0.915759	70	0.476526	0.260309	0.000465347	0.822653	1.94685e-06	0.816701	6.42529e-06	MIC not significant	FALSE	TRUE	FALSE	FALSE	FALSE	TRUE	FALSE	FALSE
pcodonCTAGGT	3971	0.0899267	0.0112225	0.003	0.362	0.000213702	0.378017	348	0.23683	0.0739397	0.001	0.782	8.87718e-05	0.792987	2.58116e-07	non-significant monotone/non-monotone	TRUE	TRUE	FALSE	FALSE	TRUE	TRUE	FALSE	FALSE
pcodonCTAGGC	3971	0.0828827	0.00405037	0.023	0.164	0.0156356	0.157515	219	0.315945	0.187359	3.9604e-05	0.99997	5.3653e-08	0.999538	2.05423e-11	Monotone	FALSE	TRUE	FALSE	FALSE	TRUE	TRUE	FALSE	TRUE
pcodonCTAGGA	3971	0.0854079	0.00781539	0.008	0.443	0.00871357	0.460083	331	0.264426	0.120811	7.92079e-05	0.997693	7.4808e-07	0.992052	7.84099e-11	Monotone	TRUE	TRUE	FALSE	TRUE	TRUE	TRUE	FALSE	TRUE
pcodonCTAGGG	3971	0.0875374	0.0148192	0.002	0.928	0.00127731	0.926167	342	0.201296	0.091062	0.099802	1	0.0947874	0.999989	1.24501e-08	MIC not significant	TRUE	FALSE	FALSE	FALSE	TRUE	FALSE	FALSE	FALSE
pcodonCTGTTT	3971	0.0906945	0.0134475	0.002	0.569	8.89699e-05	0.586407	375	0.251058	0.0867791	1.9802e-05	0.714396	2.57881e-07	0.726127	6.06096e-09	non-significant monotone/non-monotone	TRUE	TRUE	FALSE	FALSE	TRUE	TRUE	FALSE	FALSE
pcodonCTGTTC	3971	0.0781516	0.00987837	0.275	0.995	0.296485	0.990822	252	0.219679	0.0460635	0.078	0.79	0.0775317	0.804571	0.000603199	MIC not significant	FALSE	FALSE	FALSE	FALSE	FALSE	FALSE	FALSE	FALSE
pcodonCTGTTA	3971	0.0821094	0.00382368	0.051	0.297	0.0512347	0.297574	282	0.343334	0.216533	0	0.99997	5.32852e-18	0.999393	1.47123e-16	MIC not significant	FALSE	TRUE	FALSE	FALSE	FALSE	TRUE	FALSE	FALSE
pcodonCTGTTG	3971	0.100167	0.0229693	0	0.573822	2.74292e-11	0.58622	382	0.217236	0.0737008	0.007	0.976	0.00182743	0.965048	7.03875e-08	Monotone	TRUE	TRUE	FALSE	TRUE	TRUE	TRUE	FALSE	FALSE
pcodonCTGTCT	3971	0.0830939	0.00733547	0.014	0.399	0.00617328	0.41024	208	0.314471	0.149258	0.000148515	0.984584	1.8008e-06	0.970593	8.23186e-09	Monotone	TRUE	TRUE	FALSE	TRUE	TRUE	TRUE	FALSE	TRUE
pcodonCTGTCC	3971	0.0814573	0.00331848	0.018	0.105	0.010798	0.100924	142	0.273208	0.122811	0.054	0.999	0.0390153	0.991998	1.90716e-05	MIC not significant	TRUE	FALSE	FALSE	FALSE	TRUE	FALSE	FALSE	FALSE
pcodonCTGTCA	3971	0.0735149	0.00118248	0.68	0.805	0.688238	0.811706	86	0.377992	0.214592	0.014	0.998	0.00487676	0.98628	7.07665e-06	MIC not significant	FALSE	TRUE	FALSE	FALSE	FALSE	TRUE	FALSE	FALSE
pcodonCTGTCG	3971	0.0810439	0.00503834	0.042	0.373	0.0369976	0.386198	198	0.306222	0.140302	0.000237624	0.952941	2.92872e-06	0.934637	5.4335e-08	Monotone	FALSE	TRUE	FALSE	FALSE	FALSE	TRUE	FALSE	FALSE
pcodonCTGTAT	3971	0.075802	0.00350334	0.515	0.865	0.541787	0.870043	242	0.275807	0.096669	0.001	0.806	6.13406e-05	0.808876	8.03455e-07	MIC not significant	FALSE	TRUE	FALSE	FALSE	FALSE	TRUE	FALSE	FALSE
pcodonCTGTAC	3971	0.0840162	0.0130561	0.00129032	0.899484	0.000289162	0.892718	109	0.311616	0.191815	0.0457228	0.99998	0.0314414	0.9998	1.91063e-06	Monotone	TRUE	FALSE	FALSE	FALSE	TRUE	TRUE	FALSE	TRUE
pcodonCTGTAA	3971	0.0769125	0.00910646	0.198	0.995	0.209692	0.99042	117	0.33818	0.201273	0.003	0.999	0.000637894	0.997642	3.9173e-07	MIC not significant	FALSE	TRUE	FALSE	FALSE	FALSE	TRUE	FALSE	FALSE
pcodonCTGTAG	3971	0.0863039	0.0106012	0.000387097	0.341387	8.58958e-05	0.354591	160	0.355393	0.186454	6.93069e-05	0.983475	2.60515e-07	0.968138	1.19037e-08	Monotone	TRUE	TRUE	FALSE	TRUE	TRUE	TRUE	FALSE	TRUE
pcodonCTGTGT	3971	0.0922735	0.0156719	0	0.338109	1.19393e-07	0.350586	214	0.293148	0.134808	0.001	0.989	5.32537e-05	0.978762	3.12728e-08	Monotone	TRUE	TRUE	FALSE	TRUE	TRUE	TRUE	FALSE	TRUE
pcodonCTGTGC	3971	0.0791559	0.00232829	0.155	0.317	0.142742	0.333531	210	0.246172	0.0580215	0.065	0.776	0.0476786	0.79335	0.000428634	MIC not significant	FALSE	FALSE	FALSE	FALSE	FALSE	FALSE	FALSE	FALSE
pcodonCTGTGA	3971	0.0836378	0.00524328	0.012	0.191	0.0089477	0.186432	208	0.264417	0.113068	0.016	0.998	0.00830865	0.993535	6.846e-07	Monotone	TRUE	TRUE	FALSE	TRUE	TRUE	TRUE	FALSE	TRUE
pcodonCTGTGG	3971	0.0881121	0.0059319	0.003	0.118	0.00222653	0.116148	404	0.29717	0.134388	0	0.725307	4.56918e-18	0.73646	2.69579e-14	non-significant monotone/non-monotone	TRUE	TRUE	FALSE	FALSE	TRUE	TRUE	FALSE	FALSE
pcodonCTGCTT	3971	0.0854868	0.00766245	0.012	0.448	0.00950773	0.440416	339	0.240775	0.0865543	0.002	0.952	8.98152e-05	0.937936	3.40087e-08	Monotone	TRUE	TRUE	FALSE	FALSE	TRUE	TRUE	FALSE	FALSE
pcodonCTGCTC	3971	0.0782233	0.0065883	0.137	0.846	0.129768	0.846092	156	0.348349	0.177276	0.000475248	0.98501	3.49502e-06	0.96896	4.42197e-08	MIC not significant	FALSE	TRUE	FALSE	FALSE	FALSE	TRUE	FALSE	FALSE
pcodonCTGCTA	3971	0.0826748	0.00887423	0.001	0.546	0.00223214	0.562675	138	0.302642	0.101239	0.012	0.754	0.00368458	0.760517	0.000142896	non-significant monotone/non-monotone	TRUE	TRUE	FALSE	FALSE	TRUE	TRUE	FALSE	FALSE
pcodonCTGCTG	3971	0.0815375	0.00829042	0.055	0.822	0.0637674	0.812388	264	0.248173	0.113749	0.0118119	0.99998	0.00443888	0.999246	1.91588e-08	MIC not significant	FALSE	TRUE	FALSE	FALSE	FALSE	TRUE	FALSE	FALSE
pcodonCTGCCT	3971	0.0797056	0.00112192	0.258	0.342	0.25104	0.33989	319	0.203482	0.0677616	0.097	0.999	0.0958719	0.993596	2.44652e-06	MIC not significant	FALSE	FALSE	FALSE	FALSE	FALSE	FALSE	FALSE	FALSE
pcodonCTGCCC	3971	0.0795912	0.00503391	0.036	0.462	0.0256733	0.47191	91	0.278756	0.171593	0.24601	1	0.269097	0.999879	5.22229e-05	MIC not significant	FALSE	FALSE	FALSE	FALSE	FALSE	FALSE	FALSE	FALSE
pcodonCTGCCA	3971	0.0768101	0.00199209	0.234	0.444	0.231009	0.463751	102	0.36577	0.0911275	0.01	0.23	0.00227721	0.262007	0.00204603	MIC not significant	FALSE	TRUE	FALSE	FALSE	FALSE	TRUE	FALSE	FALSE
pcodonCTGCCG	3971	0.0787844	0.00158474	0.263	0.407	0.265679	0.405307	270	0.308191	0.129628	9.90099e-06	0.745604	7.88147e-10	0.755232	1.09989e-09	MIC not significant	FALSE	TRUE	FALSE	FALSE	FALSE	TRUE	FALSE	FALSE
pcodonCTGCAT	3971	0.0794653	0.00486274	0.031	0.599	0.0168334	0.634662	52	0.394365	0.296193	0.0401782	0.999891	0.0239906	0.999299	3.03954e-05	Monotone	FALSE	FALSE	FALSE	FALSE	TRUE	TRUE	FALSE	TRUE
pcodonCTGCAC	3971	0.0744366	0.00130733	0.737	0.931	0.753432	0.921136	42	0.24688	0.0970716	0.629	0.974	0.674962	0.956199	0.0450473	MIC not significant	FALSE	FALSE	FALSE	FALSE	FALSE	FALSE	FALSE	FALSE
pcodonCTGCAG	3971	0.0756933	0.00205828	0.306	0.556	0.321695	0.580745	113	0.251035	0.0179997	0.325	0.428	0.358898	0.474438	0.156563	MIC not significant	FALSE	FALSE	FALSE	FALSE	FALSE	FALSE	FALSE	FALSE
pcodonCTGCGT	3971	0.0754082	0.00424514	0.403	0.885	0.42494	0.874774	163	0.381392	0.120385	9.90099e-06	0.0430099	1.76504e-10	0.0309937	5.69423e-06	MIC not significant	FALSE	TRUE	FALSE	FALSE	FALSE	TRUE	FALSE	FALSE
pcodonCTGCGC	3971	0.0745649	0.00247535	0.555	0.876	0.563893	0.872551	78	0.250837	0.0472267	0.427	0.803	0.486517	0.793694	0.0559771	MIC not significant	FALSE	FALSE	FALSE	FALSE	FALSE	FALSE	FALSE	FALSE
pcodonCTGCGA	3971	0.0784308	0.00467101	0.076	0.566	0.0697308	0.571105	111	0.358595	0.184361	0.002	0.982	0.000344525	0.965379	2.57135e-06	MIC not significant	FALSE	TRUE	FALSE	FALSE	FALSE	TRUE	FALSE	FALSE
pcodonCTGCGG	3971	0.0775012	0.00547242	0.184	0.812	0.186868	0.802976	166	0.326427	0.103948	0.001	0.312	1.72629e-05	0.335897	2.27292e-05	MIC not significant	FALSE	TRUE	FALSE	FALSE	FALSE	TRUE	FALSE	FALSE
pcodonCTGATT	3971	0.0951372	0.00914558	3.22581e-05	0.036	4.13095e-06	0.030099	533	0.236368	0.103484	0	0.986525	1.74668e-11	0.975067	2.68627e-14	Monotone	TRUE	TRUE	FALSE	TRUE	TRUE	TRUE	FALSE	TRUE
pcodonCTGATC	3971	0.0784475	0.00364002	0.238	0.598	0.239651	0.623506	251	0.293309	0.100778	7.92079e-05	0.439485	2.22713e-07	0.470536	2.77881e-07	MIC not significant	FALSE	TRUE	FALSE	FALSE	FALSE	TRUE	FALSE	FALSE
pcodonCTGATA	3971	0.0910235	0.00999353	0	0.0800495	5.90327e-06	0.0757683	267	0.265062	0.120567	0.005	0.999	0.000199344	0.995275	5.55928e-09	Monotone	TRUE	TRUE	FALSE	TRUE	TRUE	TRUE	FALSE	TRUE
[truncated: 2,800 more rows]

## Sheet: Description
Column name	Description
Name	The name of the feature
Number of genes	The number of genes with the feature and gene expression
[truncated: 23 more rows]
