# Supplementary material for: Most associations between transcript features and gene expression are monotonic
Source: Royal Society of Chemistry journal article supplement (doi:10.1039/c3mb70617f), 2014-03-17
Supplement: c3mb70617f3.xlsx [file c3mb70617f3.xlsx]

## Sheet: Data
Name	Number of genes	MIC	Spearman (rho2)	MIC Empirical p-value	Diff Empirical p-value	Z Score p-value	Diff Z Score p-value	Number of genes Filtered	MIC Filtered	Spearman Filtered (rho2)	MIC Empirical p-value Filtered	Diff Empirical p-value Filtered	Z Score p-value Filtered	Diff Z Score p-value Filtered	Spearman p-value Filtered	Classification	MIC empirical p-value pass FDR	Filtered MIC empirical p-value pass FDR	empirical p-value non-monotonicity pass FDR	empirical p-value Monotonicity pass FDR	MIC Z score p-value pass FDR	Filtered MIC Z score p-value pass FDR	Z score p-value non-monotonicity pass FDR	Z score p-value monotonicity pass FDR
utr5gc	3682	0.0912552	0.00766938	0.067	0.635	0.0492298	0.636339	3667	0.0918508	0.00856166	0.041	0.681	0.0349586	0.684608	1.98488e-08	MIC not significant	FALSE	FALSE	FALSE	FALSE	FALSE	FALSE	FALSE	FALSE
utr5gc40	3682	0.0873537	0.00872573	0.277	0.968	0.282912	0.960313	3667	0.0873092	0.00968918	0.322	0.989	0.326433	0.984151	2.3264e-09	MIC not significant	FALSE	FALSE	FALSE	FALSE	FALSE	FALSE	FALSE	FALSE
utr5meanFE	3315	0.112753	0.0351649	0	0.99998	7.72622e-12	0.999657	3315	0.112753	0.0351649	0	0.99997	7.64361e-12	0.999649	1.29361e-27	Monotone	TRUE	TRUE	FALSE	TRUE	TRUE	TRUE	FALSE	TRUE
utr5meanFE40	3315	0.0978903	0.0168239	0.009	0.965	0.00590426	0.95108	3315	0.0978903	0.0168239	0.006	0.964	0.0055868	0.963479	6.53555e-14	Monotone	TRUE	TRUE	FALSE	FALSE	TRUE	TRUE	FALSE	FALSE
utr5bestATG	3682	0.137477	0.0673812	0	0.999806	1.80527e-53	0.999402	634	0.16338	1.65457e-05	0.216	0.173	0.227787	0.183717	0.918583	MIC not significant	TRUE	FALSE	FALSE	FALSE	TRUE	FALSE	FALSE	FALSE
utr5MeanATG	3682	0.137477	0.067562	0	0.999854	3.53935e-54	0.999536	634	0.153306	1.99925e-06	0.559	0.499	0.579998	0.526306	0.971655	MIC not significant	TRUE	FALSE	FALSE	FALSE	TRUE	FALSE	FALSE	FALSE
utr5bestATG30C	3682	0.131514	0.0585266	0	0.984563	1.4586e-45	0.979976	470	0.17953	0.00240075	0.235	0.249	0.250812	0.256897	0.289123	MIC not significant	TRUE	FALSE	FALSE	FALSE	TRUE	FALSE	FALSE	FALSE
utr5MeanATG30C	3682	0.131514	0.0584397	0	0.983961	7.65255e-46	0.978951	470	0.187751	0.00153096	0.114	0.097	0.0938751	0.0847943	0.397369	MIC not significant	TRUE	FALSE	FALSE	FALSE	TRUE	FALSE	FALSE	FALSE
utr5bestATG0	3682	0.0970224	0.0206431	0	0.620554	1.41606e-08	0.632168	256	0.181529	0.0077964	0.722	0.793	0.732057	0.795138	0.158955	MIC not significant	TRUE	FALSE	FALSE	FALSE	TRUE	FALSE	FALSE	FALSE
utr5MeanATG0	3682	0.0970224	0.0206686	0	0.624188	1.36866e-08	0.632825	256	0.145638	0.00893674	0.99903	0.999624	0.993996	0.997311	0.13142	MIC not significant	TRUE	FALSE	FALSE	FALSE	TRUE	FALSE	FALSE	FALSE
utr5bestATG1	3682	0.100385	0.0296703	0	0.992398	4.01434e-10	0.988542	324	0.185345	0.000259766	0.601	0.527	0.620442	0.557008	0.772575	MIC not significant	TRUE	FALSE	FALSE	FALSE	TRUE	FALSE	FALSE	FALSE
utr5MeanATG1	3682	0.100385	0.029725	0	0.992971	3.51225e-10	0.989195	324	0.176303	5.18114e-05	0.815	0.751	0.805254	0.757842	0.897306	MIC not significant	TRUE	FALSE	FALSE	FALSE	TRUE	FALSE	FALSE	FALSE
utr5bestATG2	3682	0.101994	0.0336472	0	0.999204	1.14126e-11	0.998063	307	0.196555	0.00622208	0.283	0.33	0.296308	0.354929	0.168017	MIC not significant	TRUE	FALSE	FALSE	FALSE	TRUE	FALSE	FALSE	FALSE
utr5MeanATG2	3682	0.101994	0.0336767	0	0.999262	9.9856e-12	0.998176	307	0.187649	0.00578225	0.51	0.576	0.5423	0.598627	0.183902	MIC not significant	TRUE	FALSE	FALSE	FALSE	TRUE	FALSE	FALSE	FALSE
utr5bestATG030C	3682	0.0946967	0.0174209	0	0.276693	6.23556e-10	0.286382	136	0.191838	0.0157616	0.93	0.962	0.916882	0.949892	0.145295	MIC not significant	TRUE	FALSE	FALSE	FALSE	TRUE	FALSE	FALSE	FALSE
utr5MeanATG030C	3682	0.0946967	0.0174137	9.90099e-06	0.273535	6.24243e-10	0.285315	136	0.191838	0.0144474	0.939	0.977	0.929816	0.961843	0.163363	MIC not significant	TRUE	FALSE	FALSE	FALSE	TRUE	FALSE	FALSE	FALSE
utr5bestATG130C	3682	0.0962786	0.0286216	0	0.998408	7.10545e-09	0.99637	214	0.266567	0.0105256	0.01	0.018	0.00277411	0.0065555	0.134657	Non-monotone	TRUE	TRUE	FALSE	FALSE	TRUE	TRUE	FALSE	FALSE
utr5MeanATG130C	3682	0.0962786	0.0286087	0	0.998165	8.33766e-09	0.996234	214	0.230553	0.0091504	0.149	0.189	0.146775	0.189014	0.16321	MIC not significant	TRUE	FALSE	FALSE	FALSE	TRUE	FALSE	FALSE	FALSE
utr5bestATG230C	3682	0.0962692	0.0234127	0	0.864233	3.97001e-09	0.86263	203	0.260759	0.00148033	0.05	0.036	0.0317032	0.0208641	0.585752	MIC not significant	TRUE	FALSE	FALSE	FALSE	TRUE	FALSE	FALSE	FALSE
utr5MeanATG230C	3682	0.0962692	0.0234064	0	0.863515	3.72574e-09	0.861611	203	0.233521	0.00182719	0.206	0.171	0.225755	0.186311	0.544816	MIC not significant	TRUE	FALSE	FALSE	FALSE	TRUE	FALSE	FALSE	FALSE
utr5numATGs	3682	0.137477	0.0675842	0	0.999882	8.83397e-54	0.999535	634	0.14052	1.45653e-05	0.731	0.687	0.751744	0.70965	0.923595	MIC not significant	TRUE	FALSE	FALSE	FALSE	TRUE	FALSE	FALSE	FALSE
utr5numATGs0	3682	0.0970224	0.0203788	0	0.590941	1.43057e-08	0.60203	256	0.16028	3.15356e-06	0.82	0.772	0.821864	0.771868	0.977443	MIC not significant	TRUE	FALSE	FALSE	FALSE	TRUE	FALSE	FALSE	FALSE
utr5numATGs1	3682	0.100385	0.0294227	0	0.990699	3.81898e-10	0.986346	324	0.177325	0.0103267	0.449	0.63	0.473628	0.635853	0.0677258	MIC not significant	TRUE	FALSE	FALSE	FALSE	TRUE	FALSE	FALSE	FALSE
utr5numATGs2	3682	0.101994	0.0337415	0	0.999262	1.2838e-11	0.998168	307	0.189702	0.00297728	0.197	0.191	0.209376	0.203664	0.340663	MIC not significant	TRUE	FALSE	FALSE	FALSE	TRUE	FALSE	FALSE	FALSE
utr5numATGs30C	3682	0.131514	0.0589141	0	0.988961	1.29742e-45	0.984682	470	0.133564	0.0126443	0.973	0.999	0.953447	0.992737	0.0147263	MIC not significant	TRUE	FALSE	FALSE	FALSE	TRUE	FALSE	FALSE	FALSE
utr5numATGs030C	3682	0.0946967	0.0173854	0	0.273564	6.07032e-10	0.281505	136	0.197818	0.0131147	0.499	0.583	0.524358	0.610844	0.184324	MIC not significant	TRUE	FALSE	FALSE	FALSE	TRUE	FALSE	FALSE	FALSE
utr5numATGs130C	3682	0.0962786	0.0284844	0	0.997882	7.01031e-09	0.995902	214	0.210072	0.00412396	0.095	0.094	0.0916572	0.0808031	0.349844	MIC not significant	TRUE	FALSE	FALSE	FALSE	TRUE	FALSE	FALSE	FALSE
utr5numATGs230C	3682	0.0962692	0.023484	0	0.869883	4.01887e-09	0.867126	203	0.197564	0.00230484	0.273	0.231	0.286605	0.241491	0.496385	MIC not significant	TRUE	FALSE	FALSE	FALSE	TRUE	FALSE	FALSE	FALSE
utr5distATG	3682	0.137477	0.0710787	0	1	1.77057e-53	0.99999	634	0.156009	0.0188881	0.284	0.807	0.290924	0.819198	0.000520172	MIC not significant	TRUE	FALSE	FALSE	FALSE	TRUE	FALSE	FALSE	FALSE
utr5distATG0	3682	0.0970224	0.0209603	0	0.655752	1.53581e-08	0.66485	256	0.188158	0.0242387	0.358	0.744	0.387319	0.748424	0.0126299	MIC not significant	TRUE	FALSE	FALSE	FALSE	TRUE	FALSE	FALSE	FALSE
utr5distATG1	3682	0.100385	0.0309301	0	0.997816	4.43158e-10	0.995765	324	0.181609	0.02394	0.45	0.877	0.489133	0.863873	0.00525256	MIC not significant	TRUE	FALSE	FALSE	FALSE	TRUE	FALSE	FALSE	FALSE
utr5distATG2	3682	0.101994	0.0344672	0	0.999728	1.06017e-11	0.999124	307	0.198127	0.00771911	0.147	0.201	0.151647	0.216621	0.124515	MIC not significant	TRUE	FALSE	FALSE	FALSE	TRUE	FALSE	FALSE	FALSE
utr5Lens	3682	0.0971046	0.0130531	0.001	0.603	0.00043983	0.594499	3682	0.0971046	0.0130531	0.001	0.589	0.000538985	0.602862	3.57463e-12	non-significant monotone/non-monotone	TRUE	TRUE	FALSE	FALSE	TRUE	TRUE	FALSE	FALSE
utr5uORFsBio	3682	0.137477	0.0675842	0	0.999864	1.1596e-53	0.999524	634	0.14052	1.45653e-05	0.744	0.7	0.763902	0.722739	0.923595	MIC not significant	TRUE	FALSE	FALSE	FALSE	TRUE	FALSE	FALSE	FALSE
u5maxLenuORFs	3682	0.137477	0.0651271	0	0.997631	7.86017e-54	0.995554	634	0.155266	0.00949791	0.303	0.531	0.307534	0.562555	0.0140918	MIC not significant	TRUE	FALSE	FALSE	FALSE	TRUE	FALSE	FALSE	FALSE
u5meanLenuORFs	3682	0.137477	0.0648667	0	0.997098	8.08238e-54	0.994789	634	0.156151	0.0118364	0.287	0.615	0.308506	0.631216	0.00610423	MIC not significant	TRUE	FALSE	FALSE	FALSE	TRUE	FALSE	FALSE	FALSE
u5maxCostuORFs	3682	0.137477	0.0651651	0	0.997621	5.53132e-54	0.995628	634	0.166452	0.00880297	0.086	0.226	0.0787553	0.238328	0.0181285	MIC not significant	TRUE	FALSE	FALSE	FALSE	TRUE	FALSE	FALSE	FALSE
u5meanCostuORFs	3682	0.137477	0.0649146	0	0.996825	1.6912e-53	0.994618	634	0.162981	0.011066	0.17	0.467	0.182458	0.488423	0.00802845	MIC not significant	TRUE	FALSE	FALSE	FALSE	TRUE	FALSE	FALSE	FALSE
utr5uORFs30C	3682	0.131514	0.0589141	0	0.988641	1.25238e-45	0.984489	470	0.133564	0.0126443	0.965	0.999	0.950103	0.990563	0.0147263	MIC not significant	TRUE	FALSE	FALSE	FALSE	TRUE	FALSE	FALSE	FALSE
u5maxLenuORFs30C	3682	0.131514	0.0575511	0	0.968388	5.96341e-46	0.963107	470	0.196592	7.41098e-07	0.018	0.014	0.0115516	0.00794355	0.985149	Non-monotone	TRUE	FALSE	FALSE	FALSE	TRUE	TRUE	FALSE	FALSE
u5meanLenuORFs30C	3682	0.131514	0.0571912	0	0.958146	1.6622e-45	0.953636	470	0.208467	0.000946104	0.004	0.003	0.000569186	0.000477888	0.505912	Non-monotone	TRUE	TRUE	FALSE	FALSE	TRUE	TRUE	TRUE	FALSE
u5maxCostuORFs30C	3682	0.131514	0.057543	0	0.967748	1.21528e-45	0.96221	470	0.194947	5.31619e-06	0.022	0.018	0.0145797	0.00869199	0.960239	Non-monotone	TRUE	FALSE	FALSE	FALSE	TRUE	TRUE	FALSE	FALSE
u5meanCostuORFs30C	3682	0.131514	0.0572175	0	0.95997	9.26404e-46	0.954515	470	0.220597	0.000658638	0.00040625	0.000291667	1.88351e-05	1.08832e-05	0.578901	Non-monotone	TRUE	TRUE	TRUE	FALSE	TRUE	TRUE	TRUE	FALSE
utr5uORFs0	3682	0.0970224	0.0203788	0	0.592	1.46733e-08	0.60378	256	0.16028	3.15356e-06	0.81	0.751	0.826491	0.768028	0.977443	MIC not significant	TRUE	FALSE	FALSE	FALSE	TRUE	FALSE	FALSE	FALSE
utr5uORFs1	3682	0.100385	0.0294227	0	0.990515	3.56721e-10	0.98631	324	0.177325	0.0103267	0.438	0.599	0.461104	0.62252	0.0677258	MIC not significant	TRUE	FALSE	FALSE	FALSE	TRUE	FALSE	FALSE	FALSE
utr5uORFs2	3682	0.101994	0.0337415	0	0.999272	1.032e-11	0.998256	307	0.189702	0.00297728	0.176	0.171	0.18627	0.17963	0.340663	MIC not significant	TRUE	FALSE	FALSE	FALSE	TRUE	FALSE	FALSE	FALSE
u5maxLenuORFs0	3682	0.0970224	0.0199453	0	0.54395	1.27383e-08	0.55416	256	0.209834	0.0201639	0.091	0.252	0.0875949	0.283314	0.0230623	MIC not significant	TRUE	FALSE	FALSE	FALSE	TRUE	FALSE	FALSE	FALSE
u5maxLenuORFs1	3682	0.100385	0.0291188	0	0.987388	4.34109e-10	0.982643	324	0.209756	0.010748	0.06	0.108	0.0585816	0.123665	0.0623331	MIC not significant	TRUE	FALSE	FALSE	FALSE	TRUE	FALSE	FALSE	FALSE
u5maxLenuORFs2	3682	0.101994	0.0333802	0	0.999049	1.07877e-11	0.997556	307	0.18224	0.0102654	0.399	0.556	0.415979	0.567481	0.0763014	MIC not significant	TRUE	FALSE	FALSE	FALSE	TRUE	FALSE	FALSE	FALSE
u5meanLenuORFs0	3682	0.0970224	0.0199663	1.02041e-05	0.54602	1.46246e-08	0.558065	256	0.22686	0.0185104	0.024	0.083	0.0145735	0.0687528	0.0295313	non-significant monotone/non-monotone	TRUE	FALSE	FALSE	FALSE	TRUE	TRUE	FALSE	FALSE
u5meanLenuORFs1	3682	0.100385	0.029196	0	0.988087	4.65022e-10	0.983531	324	0.209634	0.00814087	0.065	0.099	0.0589569	0.0971522	0.104993	MIC not significant	TRUE	FALSE	FALSE	FALSE	TRUE	FALSE	FALSE	FALSE
u5meanLenuORFs2	3682	0.101994	0.0334754	0	0.999117	9.52433e-12	0.997847	307	0.172447	0.00724537	0.619	0.701	0.630393	0.707629	0.136741	MIC not significant	TRUE	FALSE	FALSE	FALSE	TRUE	FALSE	FALSE	FALSE
u5maxCostuORFs0	3682	0.0970224	0.0199503	0	0.541835	1.2623e-08	0.553863	256	0.207781	0.0189798	0.171	0.456	0.174235	0.458564	0.0275238	MIC not significant	TRUE	FALSE	FALSE	FALSE	TRUE	FALSE	FALSE	FALSE
u5maxCostuORFs1	3682	0.100385	0.0291539	0	0.988262	3.67241e-10	0.983438	324	0.194639	0.00895774	0.277	0.423	0.314255	0.452059	0.0889708	MIC not significant	TRUE	FALSE	FALSE	FALSE	TRUE	FALSE	FALSE	FALSE
u5maxCostuORFs2	3682	0.101994	0.0333512	0	0.998825	1.17757e-11	0.997453	307	0.192053	0.0123268	0.33	0.545	0.378081	0.577397	0.0519663	MIC not significant	TRUE	FALSE	FALSE	FALSE	TRUE	FALSE	FALSE	FALSE
u5meanCostuORFs0	3682	0.0970224	0.0199468	0	0.545832	1.57558e-08	0.557001	256	0.255248	0.0196354	0.001	0.012	0.000348812	0.00503177	0.0249533	Non-monotone	TRUE	TRUE	FALSE	FALSE	TRUE	TRUE	FALSE	FALSE
u5meanCostuORFs1	3682	0.100385	0.0292323	0	0.988854	4.67345e-10	0.9839	324	0.223304	0.00642753	0.028	0.036	0.0162856	0.0259608	0.149914	Non-monotone	TRUE	FALSE	FALSE	FALSE	TRUE	TRUE	FALSE	FALSE
u5meanCostuORFs2	3682	0.101994	0.033431	0	0.999019	1.12594e-11	0.997628	307	0.200382	0.00997484	0.183	0.278	0.173969	0.289555	0.0806081	MIC not significant	TRUE	FALSE	FALSE	FALSE	TRUE	FALSE	FALSE	FALSE
utr5uORFs030C	3682	0.0946967	0.0173854	0	0.269545	5.12948e-10	0.278595	136	0.197818	0.0131147	0.513	0.572	0.54173	0.621686	0.184324	MIC not significant	TRUE	FALSE	FALSE	FALSE	TRUE	FALSE	FALSE	FALSE
utr5uORFs130C	3682	0.0962786	0.0284844	0	0.997932	7.8687e-09	0.995723	214	0.210072	0.00412396	0.094	0.084	0.0955247	0.0889417	0.349844	MIC not significant	TRUE	FALSE	FALSE	FALSE	TRUE	FALSE	FALSE	FALSE
utr5uORFs230C	3682	0.0962692	0.023484	0	0.868544	4.10816e-09	0.8665	203	0.197564	0.00230484	0.267	0.233	0.282781	0.237572	0.496385	MIC not significant	TRUE	FALSE	FALSE	FALSE	TRUE	FALSE	FALSE	FALSE
u5maxLenuORFs030C	3682	0.0946967	0.0172221	0	0.252228	4.82388e-10	0.2617	136	0.282533	0.00429711	0.028	0.022	0.0166488	0.0117433	0.448316	Non-monotone	TRUE	FALSE	FALSE	FALSE	TRUE	TRUE	FALSE	FALSE
u5maxLenuORFs130C	3682	0.0962786	0.028397	0	0.997689	7.86767e-09	0.995439	214	0.261342	0.00321164	0.011	0.008	0.00473833	0.00339891	0.409464	Non-monotone	TRUE	TRUE	FALSE	FALSE	TRUE	TRUE	FALSE	FALSE
u5maxLenuORFs230C	3682	0.0962692	0.0233829	0	0.859767	4.24664e-09	0.858861	203	0.178959	0.00022314	0.859	0.801	0.850509	0.801914	0.832474	MIC not significant	TRUE	FALSE	FALSE	FALSE	TRUE	FALSE	FALSE	FALSE
u5meanLenuORFs030C	3682	0.0946967	0.0172073	0	0.250738	5.01763e-10	0.258907	136	0.280624	0.00623736	0.03	0.024	0.0219735	0.0196651	0.360744	Non-monotone	TRUE	FALSE	FALSE	FALSE	TRUE	FALSE	FALSE	FALSE
u5meanLenuORFs130C	3682	0.0962786	0.0283743	0	0.997699	7.10224e-09	0.995362	214	0.248717	0.00236702	0.024	0.022	0.0134175	0.00981797	0.478965	Non-monotone	TRUE	FALSE	FALSE	FALSE	TRUE	TRUE	FALSE	FALSE
u5meanLenuORFs230C	3682	0.0962692	0.0233584	0	0.859816	4.4432e-09	0.85773	203	0.189413	0.000697327	0.687	0.62	0.717579	0.655967	0.708417	MIC not significant	TRUE	FALSE	FALSE	FALSE	TRUE	FALSE	FALSE	FALSE
u5maxCostuORFs030C	3682	0.0946967	0.0172327	0	0.254812	5.47245e-10	0.262497	136	0.306086	0.00209744	0.017	0.012	0.00355886	0.00170982	0.596501	Non-monotone	TRUE	FALSE	FALSE	FALSE	TRUE	TRUE	FALSE	FALSE
u5maxCostuORFs130C	3682	0.0962786	0.0284239	1.02041e-05	0.997969	6.89388e-09	0.995652	214	0.256381	0.00563804	0.016	0.018	0.00924104	0.0103309	0.274158	Non-monotone	TRUE	FALSE	FALSE	FALSE	TRUE	TRUE	FALSE	FALSE
u5maxCostuORFs230C	3682	0.0962692	0.0233361	0	0.860127	4.40917e-09	0.857865	203	0.219319	0.00166729	0.343	0.298	0.375959	0.328874	0.56298	MIC not significant	TRUE	FALSE	FALSE	FALSE	TRUE	FALSE	FALSE	FALSE
u5meanCostuORFs030C	3682	0.0946967	0.0172168	0	0.255901	5.34772e-10	0.262297	136	0.305045	0.0036148	0.01	0.007	0.00505616	0.00323858	0.486862	Non-monotone	TRUE	TRUE	FALSE	FALSE	TRUE	TRUE	FALSE	FALSE
u5meanCostuORFs130C	3682	0.0962786	0.0284001	0	0.997883	7.85286e-09	0.995467	214	0.258102	0.0044792	0.023	0.019	0.00732804	0.00693336	0.329851	Non-monotone	TRUE	FALSE	FALSE	FALSE	TRUE	TRUE	FALSE	FALSE
u5meanCostuORFs230C	3682	0.0962692	0.0233143	1.02041e-05	0.856959	4.76929e-09	0.855572	203	0.211864	0.00266605	0.52	0.47	0.541695	0.49491	0.464405	MIC not significant	TRUE	FALSE	FALSE	FALSE	TRUE	FALSE	FALSE	FALSE
rutr5bestATG	3648	0.140644	0.104151	0	1	6.11803e-64	1	3647	0.140567	0.103956	0	1	1.9151e-63	1	5.38842e-89	Monotone	TRUE	TRUE	FALSE	TRUE	TRUE	TRUE	FALSE	TRUE
rutr5MeanATG	3648	0.142478	0.104325	0	1	1.16123e-67	1	3647	0.142386	0.10413	0	1	4.29229e-68	1	3.78093e-89	Monotone	TRUE	TRUE	FALSE	TRUE	TRUE	TRUE	FALSE	TRUE
rutr5bestATG30C	3648	0.136206	0.0907115	0	1	1.30887e-53	1	3647	0.136143	0.0905197	0	1	2.10599e-53	1	3.48597e-77	Monotone	TRUE	TRUE	FALSE	TRUE	TRUE	TRUE	FALSE	TRUE
rutr5MeanATG30C	3648	0.137857	0.090612	0	1	3.55506e-57	1	3647	0.137794	0.0904202	0	1	4.44116e-57	1	4.25741e-77	Monotone	TRUE	TRUE	FALSE	TRUE	TRUE	TRUE	FALSE	TRUE
rutr5bestATG0	3648	0.125459	0.0660687	0	1	3.68775e-33	1	3647	0.125392	0.0658923	0	1	4.13161e-33	1	5.733e-56	Monotone	TRUE	TRUE	FALSE	TRUE	TRUE	TRUE	FALSE	TRUE
rutr5MeanATG0	3648	0.124872	0.0660867	0	1	1.92042e-32	1	3647	0.124805	0.0659104	0	1	3.88497e-32	1	5.53416e-56	Monotone	TRUE	TRUE	FALSE	TRUE	TRUE	TRUE	FALSE	TRUE
rutr5bestATG1	3648	0.122578	0.0706056	0	1	5.31984e-29	1	3647	0.122479	0.0704262	0	1	1.19454e-28	1	7.8158e-60	Monotone	TRUE	TRUE	FALSE	TRUE	TRUE	TRUE	FALSE	TRUE
rutr5MeanATG1	3648	0.122736	0.0706534	0	1	4.49652e-29	1	3647	0.122647	0.070474	0	1	7.48968e-29	1	7.11443e-60	Monotone	TRUE	TRUE	FALSE	TRUE	TRUE	TRUE	FALSE	TRUE
rutr5bestATG2	3648	0.123389	0.0744396	0	1	5.69261e-30	1	3647	0.123264	0.0742573	0	1	8.86173e-30	1	4.09966e-63	Monotone	TRUE	TRUE	FALSE	TRUE	TRUE	TRUE	FALSE	TRUE
rutr5MeanATG2	3648	0.122919	0.0745228	0	1	3.10033e-29	1	3647	0.122793	0.0743405	0	1	3.56019e-29	1	3.47881e-63	Monotone	TRUE	TRUE	FALSE	TRUE	TRUE	TRUE	FALSE	TRUE
rutr5bestATG030C	3648	0.122906	0.0603954	0	1	2.54987e-29	1	3647	0.122842	0.0602225	0	1	4.83745e-29	1	3.69385e-51	Monotone	TRUE	TRUE	FALSE	TRUE	TRUE	TRUE	FALSE	TRUE
rutr5MeanATG030C	3648	0.12284	0.0603867	0	1	5.80673e-29	1	3647	0.122776	0.0602138	0	1	4.34941e-29	1	3.75718e-51	Monotone	TRUE	TRUE	FALSE	TRUE	TRUE	TRUE	FALSE	TRUE
rutr5bestATG130C	3648	0.124123	0.0657092	0	1	4.12335e-31	1	3647	0.12404	0.065532	0	1	5.96372e-31	1	1.1611e-55	Monotone	TRUE	TRUE	FALSE	TRUE	TRUE	TRUE	FALSE	TRUE
rutr5MeanATG130C	3648	0.123709	0.0656911	0	1	1.75566e-30	1	3647	0.123614	0.0655138	0	1	1.51697e-30	1	1.20313e-55	Monotone	TRUE	TRUE	FALSE	TRUE	TRUE	TRUE	FALSE	TRUE
rutr5bestATG230C	3648	0.117294	0.0652933	0	1	1.7831e-21	1	3647	0.117237	0.0651163	0	1	3.16339e-21	1	2.61959e-55	Monotone	TRUE	TRUE	FALSE	TRUE	TRUE	TRUE	FALSE	TRUE
rutr5MeanATG230C	3648	0.117486	0.0652542	0	1	8.24689e-22	1	3647	0.117436	0.0650773	0	1	1.92862e-21	1	2.82748e-55	Monotone	TRUE	TRUE	FALSE	TRUE	TRUE	TRUE	FALSE	TRUE
utr5_PARS_numBP_all	2342	0.104212	0.00668139	0.154	0.57	0.147017	0.584845	1168	0.136451	0.00136862	0.042	0.048	0.034041	0.0399637	0.206439	MIC not significant	FALSE	FALSE	FALSE	FALSE	FALSE	FALSE	FALSE	FALSE
orfgc	3682	0.163917	0.13865	0	1	7.70062e-133	1	3682	0.163917	0.13865	0	1	2.64596e-133	1	1.89479e-121	Monotone	TRUE	TRUE	FALSE	TRUE	TRUE	TRUE	FALSE	TRUE
orfmeanFE	3682	0.143032	0.0856967	0	1	1.47042e-71	1	3682	0.143032	0.0856967	0	1	1.26751e-71	1	1.14127e-73	Monotone	TRUE	TRUE	FALSE	TRUE	TRUE	TRUE	FALSE	TRUE
orfbestATG	3682	0.119228	0.0480627	0	1	2.81685e-23	0.999981	3679	0.118419	0.0477029	0	1	6.48873e-22	0.999989	5.63306e-41	Monotone	TRUE	TRUE	FALSE	TRUE	TRUE	TRUE	FALSE	TRUE
orfMeanATG	3682	0.108828	0.0195101	0	0.222158	2.32463e-12	0.2307	3679	0.107976	0.0192459	0	0.288474	2.25961e-11	0.30144	2.84773e-17	non-significant monotone/non-monotone	TRUE	TRUE	FALSE	FALSE	TRUE	TRUE	FALSE	FALSE
orfbestATG30C	3682	0.100385	0.0185665	9.90099e-05	0.865624	5.78128e-06	0.861159	2812	0.0957841	0.00669511	0.413	0.951	0.443826	0.938006	1.39703e-05	MIC not significant	TRUE	FALSE	FALSE	FALSE	TRUE	FALSE	FALSE	FALSE
orfMeanATG30C	3682	0.0969877	0.0173919	0.00149505	0.976693	0.000387558	0.9668	2812	0.0952443	0.00555261	0.538	0.942	0.547723	0.932052	7.64737e-05	MIC not significant	TRUE	FALSE	FALSE	FALSE	TRUE	FALSE	FALSE	FALSE
orfbestATG200C	3682	0.0943167	0.0131186	0.009	0.93	0.00547218	0.922707	3679	0.0934533	0.0128905	0.027	0.947	0.0156627	0.937112	4.96637e-12	non-significant monotone/non-monotone	TRUE	FALSE	FALSE	FALSE	TRUE	TRUE	FALSE	FALSE
orfMeanATG200C	3682	0.0931033	0.00646266	0.04	0.542	0.0329419	0.562583	3679	0.0921144	0.00629508	0.075	0.636	0.0626676	0.649347	1.44712e-06	MIC not significant	FALSE	FALSE	FALSE	FALSE	FALSE	FALSE	FALSE	FALSE
orfbestATG0	3682	0.117783	0.0446259	0	1	1.04588e-22	0.999932	3574	0.103719	0.0312664	1.9802e-05	1	3.40782e-07	0.999992	1.71865e-26	Monotone	TRUE	TRUE	FALSE	TRUE	TRUE	TRUE	FALSE	TRUE
orfMeanATG0	3682	0.115268	0.0247462	0	0.120347	1.58904e-19	0.118724	3574	0.100051	0.0142218	0.003	0.775	0.000101166	0.779972	8.52333e-13	non-significant monotone/non-monotone	TRUE	TRUE	FALSE	FALSE	TRUE	TRUE	FALSE	FALSE
orfbestATG1	3682	0.114701	0.0454206	0	1	1.24775e-18	1	3655	0.110471	0.0408313	0	1	2.2363e-13	1	5.54084e-35	Monotone	TRUE	TRUE	FALSE	TRUE	TRUE	TRUE	FALSE	TRUE
orfMeanATG1	3682	0.114093	0.0207286	0	0.0273627	4.02206e-18	0.0204057	3655	0.110555	0.0173245	0	0.0428713	2.77125e-13	0.0361127	1.35473e-15	Non-monotone	TRUE	TRUE	FALSE	FALSE	TRUE	TRUE	FALSE	FALSE
orfbestATG2	3682	0.118028	0.0601831	0	1	9.7163e-23	1	3224	0.101823	0.0255294	0.00213861	1	0.000588242	0.999961	7.01058e-20	Monotone	TRUE	TRUE	FALSE	TRUE	TRUE	TRUE	FALSE	TRUE
orfMeanATG2	3682	0.11241	0.0450328	0	1	1.35619e-16	1	3224	0.0977688	0.0134793	0.044	0.99	0.034388	0.978025	3.79077e-11	Monotone	TRUE	FALSE	FALSE	FALSE	TRUE	FALSE	FALSE	FALSE
orfbestATG030C	3682	0.0882138	0.000618074	0.102	0.12	0.104839	0.122553	979	0.143713	0.000815334	0.157	0.141	0.156082	0.14872	0.372142	MIC not significant	FALSE	FALSE	FALSE	FALSE	FALSE	FALSE	FALSE	FALSE
orfMeanATG030C	3682	0.0882138	0.0006376	0.109	0.128	0.0961273	0.115058	979	0.1453	0.00108598	0.107	0.117	0.101196	0.103461	0.302979	MIC not significant	FALSE	FALSE	FALSE	FALSE	FALSE	FALSE	FALSE	FALSE
orfbestATG130C	3682	0.0936024	0.0146323	0.009	0.971	0.00848437	0.960083	2194	0.101382	0.00508294	0.626	0.942	0.651037	0.919626	0.000832353	MIC not significant	TRUE	FALSE	FALSE	FALSE	TRUE	FALSE	FALSE	FALSE
orfMeanATG130C	3682	0.0937551	0.0138562	0.013	0.923	0.00724006	0.921539	2194	0.104573	0.00391035	0.403	0.727	0.423089	0.727115	0.00338694	MIC not significant	TRUE	FALSE	FALSE	FALSE	TRUE	FALSE	FALSE	FALSE
orfbestATG230C	3682	0.0858112	0.00384788	0.155	0.472	0.141786	0.473808	619	0.151878	0.00893535	0.51	0.794	0.537394	0.790323	0.0186568	MIC not significant	FALSE	FALSE	FALSE	FALSE	FALSE	FALSE	FALSE	FALSE
orfMeanATG230C	3682	0.0858112	0.00382389	0.153	0.462	0.149086	0.462521	619	0.150203	0.0080832	0.594	0.823	0.611017	0.81174	0.0252955	MIC not significant	FALSE	FALSE	FALSE	FALSE	FALSE	FALSE	FALSE	FALSE
orfbestATG0200C	3682	0.088588	0.00348216	0.219	0.574	0.219887	0.599617	3415	0.0882132	0.00131177	0.571	0.695	0.584971	0.69985	0.0343065	MIC not significant	FALSE	FALSE	FALSE	FALSE	FALSE	FALSE	FALSE	FALSE
orfMeanATG0200C	3682	0.0876224	0.00246826	0.378	0.615	0.371841	0.649138	3415	0.0893148	0.000645409	0.521	0.565	0.529667	0.571722	0.137727	MIC not significant	FALSE	FALSE	FALSE	FALSE	FALSE	FALSE	FALSE	FALSE
orfbestATG1200C	3682	0.0967872	0.0184644	0.00207143	0.995857	0.000533543	0.991292	3650	0.0928621	0.0146681	0.04	0.999	0.0347045	0.997119	2.11168e-13	Monotone	TRUE	FALSE	FALSE	FALSE	TRUE	FALSE	FALSE	FALSE
orfMeanATG1200C	3682	0.0983024	0.0116069	0.000951456	0.517786	0.000205418	0.536772	3650	0.0939365	0.0085387	0.032	0.751	0.0225341	0.755581	2.23525e-08	non-significant monotone/non-monotone	TRUE	FALSE	FALSE	FALSE	TRUE	FALSE	FALSE	FALSE
orfbestATG2200C	3682	0.0932754	0.0127233	0.02	0.908	0.0139593	0.901508	2459	0.104018	0.00460092	0.175	0.497	0.1762	0.522628	0.000763367	MIC not significant	FALSE	FALSE	FALSE	FALSE	TRUE	FALSE	FALSE	FALSE
orfMeanATG2200C	3682	0.0939268	0.0117982	0.008	0.83	0.0092737	0.82985	2459	0.108647	0.0034373	0.031	0.109	0.0244477	0.107772	0.00363385	non-significant monotone/non-monotone	TRUE	FALSE	FALSE	FALSE	TRUE	FALSE	FALSE	FALSE
orfnumATGs	3682	0.158009	0.135014	0	1	2.45866e-88	1	3679	0.158729	0.134586	0	1	2.6241e-89	1	1.38072e-117	Monotone	TRUE	TRUE	FALSE	TRUE	TRUE	TRUE	FALSE	TRUE
orfnumATGs0	3682	0.141854	0.0971665	0	1	1.52577e-54	1	3574	0.136256	0.0807779	0	1	1.92184e-41	1	2.18442e-67	Monotone	TRUE	TRUE	FALSE	TRUE	TRUE	TRUE	FALSE	TRUE
orfnumATGs1	3682	0.14049	0.114856	0	1	5.87521e-52	1	3655	0.139853	0.109018	0	1	2.05626e-49	1	1.08831e-93	Monotone	TRUE	TRUE	FALSE	TRUE	TRUE	TRUE	FALSE	TRUE
orfnumATGs2	3682	0.136847	0.113502	0	1	1.14145e-45	1	3224	0.136276	0.0789356	0	1	3.48465e-32	1	1.47526e-59	Monotone	TRUE	TRUE	FALSE	TRUE	TRUE	TRUE	FALSE	TRUE
orfnumATGs30C	3682	0.0939069	0.0180979	0.018	0.999	0.0112917	0.991982	2812	0.0939026	0.00584423	0.437	0.881	0.454669	0.875017	4.94907e-05	MIC not significant	FALSE	FALSE	FALSE	FALSE	TRUE	FALSE	FALSE	FALSE
orfnumATGs030C	3682	0.0882138	0.000397345	0.123	0.128	0.117774	0.123833	979	0.120359	0.00148165	0.741	0.751	0.743443	0.76188	0.228865	MIC not significant	FALSE	FALSE	FALSE	FALSE	FALSE	FALSE	FALSE	FALSE
orfnumATGs130C	3682	0.0908541	0.0155573	0.05	0.997	0.0447479	0.992553	2194	0.0995178	0.00670252	0.591	0.936	0.601724	0.929926	0.00012353	MIC not significant	FALSE	FALSE	FALSE	FALSE	FALSE	FALSE	FALSE	FALSE
orfnumATGs230C	3682	0.0858112	0.00358397	0.162	0.442	0.156753	0.453524	619	0.136861	0.00499374	0.512	0.634	0.532848	0.641417	0.0789515	MIC not significant	FALSE	FALSE	FALSE	FALSE	FALSE	FALSE	FALSE	FALSE
orfnumATGs200C	3682	0.123336	0.0553475	0	1	5.46921e-26	0.999999	3679	0.123187	0.0549523	0	1	1.39233e-25	0.999998	4.15759e-47	Monotone	TRUE	TRUE	FALSE	TRUE	TRUE	TRUE	FALSE	TRUE
orfnumATGs0200C	3682	0.0982086	0.00830178	0.000475248	0.0837525	0.000152001	0.0804247	3415	0.0911654	0.00539369	0.156	0.602	0.154151	0.617349	1.73891e-05	MIC not significant	TRUE	FALSE	FALSE	FALSE	TRUE	FALSE	FALSE	FALSE
orfnumATGs1200C	3682	0.114705	0.0443475	0	1	3.64983e-16	0.999969	3650	0.111539	0.0388393	0	0.99993	1.61793e-12	0.999779	2.77509e-33	Monotone	TRUE	TRUE	FALSE	TRUE	TRUE	TRUE	FALSE	TRUE
orfnumATGs2200C	3682	0.0947069	0.0165842	0.005	0.977	0.00390505	0.964322	2459	0.102113	0.0110054	0.206	0.921	0.210772	0.91657	1.84922e-07	MIC not significant	TRUE	FALSE	FALSE	FALSE	TRUE	FALSE	FALSE	FALSE
orfdistATG	3682	0.103229	0.0265681	0	0.992406	4.24981e-07	0.988761	3679	0.103124	0.0262687	0	0.99195	5.25981e-07	0.987798	4.4725e-23	Monotone	TRUE	TRUE	FALSE	TRUE	TRUE	TRUE	FALSE	TRUE
orfdistATG0	3682	0.0856466	2.34047e-05	0.442	0.416	0.454531	0.426745	3574	0.0861745	0.00189176	0.509	0.672	0.519335	0.683026	0.00930773	MIC not significant	FALSE	FALSE	FALSE	FALSE	FALSE	FALSE	FALSE	FALSE
orfdistATG1	3682	0.0988273	0.0222738	0.000227723	0.992842	0.000100524	0.98958	3655	0.098086	0.0187556	0.000930693	0.959584	0.000417962	0.953679	9.10067e-17	Monotone	TRUE	TRUE	FALSE	FALSE	TRUE	TRUE	FALSE	FALSE
orfdistATG2	3682	0.0876899	0.0152254	0.229	1	0.235663	0.999608	3224	0.0892079	1.06374e-06	0.506	0.484	0.529294	0.500276	0.953319	MIC not significant	FALSE	FALSE	FALSE	FALSE	FALSE	FALSE	FALSE	FALSE
orfLens	3682	0.163606	0.11528	0	1	2.34706e-103	1	3682	0.163606	0.11528	0	1	6.22909e-103	1	5.12935e-100	Monotone	TRUE	TRUE	FALSE	TRUE	TRUE	TRUE	FALSE	TRUE
orfuORFs	3682	0.143329	0.0936727	0	1	1.38975e-57	1	3436	0.155701	0.129928	0	1	2.13391e-69	1	6.19734e-106	Monotone	TRUE	TRUE	FALSE	TRUE	TRUE	TRUE	FALSE	TRUE
orfmaxLenuORFs	3682	0.134288	0.0734069	0	1	1.77322e-41	1	3436	0.148713	0.102425	0	1	4.92969e-56	1	1.12281e-82	Monotone	TRUE	TRUE	FALSE	TRUE	TRUE	TRUE	FALSE	TRUE
orfmeanLenuORFs	3682	0.128013	0.0400267	0	0.274624	1.35579e-39	0.287304	3436	0.132862	0.0569409	0	1	4.56305e-39	0.99998	1.09019e-45	Monotone	TRUE	TRUE	FALSE	TRUE	TRUE	TRUE	FALSE	TRUE
orfmaxCostuORFs	3682	0.149293	0.0794686	0	1	1.86431e-88	1	3436	0.158243	0.110627	0	1	1.23731e-95	1	1.54213e-89	Monotone	TRUE	TRUE	FALSE	TRUE	TRUE	TRUE	FALSE	TRUE
orfmeanCostuORFs	3682	0.131568	0.0444726	0	0.413139	1.06285e-46	0.431424	3436	0.140723	0.0630128	0	0.99999	2.77776e-53	0.999897	1.58164e-50	Monotone	TRUE	TRUE	FALSE	TRUE	TRUE	TRUE	FALSE	TRUE
orfuORFs30C	3682	0.0939069	0.0180979	0.016	0.992	0.00931248	0.992136	2812	0.0939026	0.00584423	0.413	0.855	0.436714	0.861258	4.94907e-05	MIC not significant	FALSE	FALSE	FALSE	FALSE	TRUE	FALSE	FALSE	FALSE
orfmaxLenuORFs30C	3682	0.0930654	0.0108656	0.018	0.761	0.0139092	0.784369	2812	0.098903	0.000789881	0.108	0.131	0.0990093	0.116973	0.136229	MIC not significant	FALSE	FALSE	FALSE	FALSE	TRUE	FALSE	FALSE	FALSE
orfmeanLenuORFs30C	3682	0.0827965	0.00780189	0.742	0.997	0.753048	0.99696	2812	0.0864984	8.80566e-07	0.941	0.93	0.936104	0.926225	0.960331	MIC not significant	FALSE	FALSE	FALSE	FALSE	FALSE	FALSE	FALSE	FALSE
orfmaxCostuORFs30C	3682	0.113257	0.0115152	0	3.9604e-05	1.67493e-15	1.27001e-06	2812	0.130585	0.00111001	0	0	1.19591e-20	6.74766e-20	0.0773224	Non-monotone	TRUE	TRUE	TRUE	FALSE	TRUE	TRUE	TRUE	FALSE
orfmeanCostuORFs30C	3682	0.0931067	0.00830067	0.028	0.532	0.019247	0.55231	2812	0.0959504	3.1722e-05	0.302	0.28	0.323227	0.294187	0.765293	MIC not significant	FALSE	FALSE	FALSE	FALSE	FALSE	FALSE	FALSE	FALSE
orfuORFs200C	3682	0.121872	0.0571853	0	1	4.53079e-24	1	3647	0.12163	0.052879	0	1	9.93472e-23	0.999998	5.70489e-45	Monotone	TRUE	TRUE	FALSE	TRUE	TRUE	TRUE	FALSE	TRUE
orfmaxLenuORFs200C	3682	0.14166	0.0862441	0	1	1.97137e-54	1	3647	0.139515	0.0819495	0	1	2.53317e-48	1	9.71125e-70	Monotone	TRUE	TRUE	FALSE	TRUE	TRUE	TRUE	FALSE	TRUE
orfmeanLenuORFs200C	3682	0.127328	0.0498922	0	0.998693	3.51872e-38	0.996349	3647	0.12706	0.0460502	0	0.97181	6.73074e-36	0.962379	2.96682e-39	Monotone	TRUE	TRUE	FALSE	FALSE	TRUE	TRUE	FALSE	FALSE
orfmaxCostuORFs200C	3682	0.140263	0.0935096	0	1	1.31455e-65	1	3647	0.138535	0.0891911	0	1	1.47426e-58	1	5.02202e-76	Monotone	TRUE	TRUE	FALSE	TRUE	TRUE	TRUE	FALSE	TRUE
orfmeanCostuORFs200C	3682	0.126778	0.054347	0	1	2.56262e-37	0.999998	3647	0.125605	0.0504264	0	1	5.77685e-33	0.999964	6.50776e-43	Monotone	TRUE	TRUE	FALSE	TRUE	TRUE	TRUE	FALSE	TRUE
orfuORFs0	3682	0.141854	0.0971665	0	1	5.15958e-55	1	3574	0.136256	0.0807779	0	1	2.47545e-41	1	2.18442e-67	Monotone	TRUE	TRUE	FALSE	TRUE	TRUE	TRUE	FALSE	TRUE
orfuORFs1	3682	0.136045	0.0936841	0	1	3.81817e-44	1	3483	0.13892	0.107641	0	1	2.34423e-42	1	3.37378e-88	Monotone	TRUE	TRUE	FALSE	TRUE	TRUE	TRUE	FALSE	TRUE
orfuORFs2	3682	0.132956	0.100462	0	1	2.08853e-39	1	3147	0.137211	0.0777887	0	1	1.0453e-31	1	2.52288e-57	Monotone	TRUE	TRUE	FALSE	TRUE	TRUE	TRUE	FALSE	TRUE
orfmaxLenuORFs0	3682	0.151173	0.108168	0	1	4.15991e-73	1	3574	0.14348	0.0915889	0	1	4.28128e-53	1	1.36689e-76	Monotone	TRUE	TRUE	FALSE	TRUE	TRUE	TRUE	FALSE	TRUE
orfmaxLenuORFs1	3682	0.0828861	0.00363506	0.751	0.962	0.75911	0.950503	3483	0.087774	0.00276213	0.441	0.695	0.449658	0.692625	0.00191749	MIC not significant	FALSE	FALSE	FALSE	FALSE	FALSE	FALSE	FALSE	FALSE
orfmaxLenuORFs2	3682	0.114104	0.0608146	0	1	9.62334e-16	1	3147	0.10725	0.0331504	0.000128713	0.99998	8.78296e-06	0.999932	7.34169e-25	Monotone	TRUE	TRUE	FALSE	TRUE	TRUE	TRUE	FALSE	TRUE
orfmeanLenuORFs0	3682	0.150244	0.0956489	0	1	3.70257e-85	1	3574	0.134417	0.0793251	0	1	7.96799e-46	1	3.70022e-66	Monotone	TRUE	TRUE	FALSE	TRUE	TRUE	TRUE	FALSE	TRUE
orfmeanLenuORFs1	3682	0.0994107	0.00814042	0.000168317	0.0469901	3.61399e-05	0.0406096	3483	0.103072	0.0135083	6.25e-05	0.23376	7.32342e-06	0.240357	5.97999e-12	non-significant monotone/non-monotone	TRUE	TRUE	FALSE	FALSE	TRUE	TRUE	FALSE	FALSE
orfmeanLenuORFs2	3682	0.0940489	0.0312996	0.014	1	0.00907996	1	3147	0.0883682	0.00737453	0.647	0.987	0.653477	0.984529	1.40402e-06	MIC not significant	TRUE	FALSE	FALSE	FALSE	TRUE	FALSE	FALSE	FALSE
orfmaxCostuORFs0	3682	0.156239	0.116823	0	1	5.25057e-109	1	3574	0.147981	0.100132	0	1	3.36571e-78	1	6.13377e-84	Monotone	TRUE	TRUE	FALSE	TRUE	TRUE	TRUE	FALSE	TRUE
orfmaxCostuORFs1	3682	0.0933611	0.00587077	0.024	0.237	0.0132911	0.253946	3483	0.0971087	0.00502196	0.007	0.083	0.00329361	0.0828966	2.83856e-05	non-significant monotone/non-monotone	FALSE	TRUE	FALSE	FALSE	TRUE	TRUE	FALSE	FALSE
orfmaxCostuORFs2	3682	0.117957	0.061385	0	1	6.65136e-20	1	3147	0.107955	0.0337507	3.9604e-05	0.99999	2.81272e-06	0.999952	2.74046e-25	Monotone	TRUE	TRUE	FALSE	TRUE	TRUE	TRUE	FALSE	TRUE
orfmeanCostuORFs0	3682	0.156988	0.105115	0	1	3.45598e-111	1	3574	0.14087	0.0885773	0	1	1.5473e-60	1	5.1305e-74	Monotone	TRUE	TRUE	FALSE	TRUE	TRUE	TRUE	FALSE	TRUE
orfmeanCostuORFs1	3682	0.102145	0.00539613	0.001	0.004	2.59612e-07	0.000352709	3483	0.106715	0.00949257	0	0.00844554	2.80405e-08	0.00447391	8.32913e-09	Non-monotone	TRUE	TRUE	FALSE	FALSE	TRUE	TRUE	FALSE	FALSE
orfmeanCostuORFs2	3682	0.10032	0.0313267	5.10204e-05	1	8.78888e-06	0.999999	3147	0.0901928	0.00740621	0.524	0.985	0.548903	0.97841	1.33264e-06	MIC not significant	TRUE	FALSE	FALSE	FALSE	TRUE	FALSE	FALSE	FALSE
orfuORFs030C	3682	0.0882138	0.000397345	0.116	0.128	0.115283	0.12081	979	0.120359	0.00148165	0.773	0.776	0.770197	0.785474	0.228865	MIC not significant	FALSE	FALSE	FALSE	FALSE	FALSE	FALSE	FALSE	FALSE
orfuORFs130C	3682	0.0908541	0.0155573	0.058	0.997	0.0579331	0.995406	2194	0.0995178	0.00670252	0.576	0.934	0.590599	0.923527	0.00012353	MIC not significant	FALSE	FALSE	FALSE	FALSE	FALSE	FALSE	FALSE	FALSE
orfuORFs230C	3682	0.0858112	0.00358397	0.136	0.416	0.133791	0.423362	619	0.136861	0.00499374	0.498	0.62	0.532268	0.639649	0.0789515	MIC not significant	FALSE	FALSE	FALSE	FALSE	FALSE	FALSE	FALSE	FALSE
orfmaxLenuORFs030C	3682	0.0882138	0.00319576	0.126	0.315	0.118791	0.345716	979	0.214685	0.147996	0	1	1.70298e-23	1	6.91737e-36	MIC not significant	FALSE	TRUE	FALSE	FALSE	FALSE	TRUE	FALSE	FALSE
orfmaxLenuORFs130C	3682	0.0870862	0.00707239	0.307	0.932	0.319804	0.925537	2194	0.0974889	0.00084806	0.747	0.776	0.754491	0.777122	0.172704	MIC not significant	FALSE	FALSE	FALSE	FALSE	FALSE	FALSE	FALSE	FALSE
orfmaxLenuORFs230C	3682	0.0858112	0.00334018	0.127	0.384	0.129808	0.401002	619	0.154393	8.02395e-06	0.268	0.228	0.279866	0.237373	0.943928	MIC not significant	FALSE	FALSE	FALSE	FALSE	FALSE	FALSE	FALSE	FALSE
orfmeanLenuORFs030C	3682	0.0882138	0.00320137	0.114	0.32	0.107838	0.333325	979	0.213291	0.148427	0	1	4.41459e-23	1	5.3942e-36	MIC not significant	FALSE	TRUE	FALSE	FALSE	FALSE	TRUE	FALSE	FALSE
orfmeanLenuORFs130C	3682	0.0874681	0.00579736	0.256	0.826	0.260875	0.831765	2194	0.0999041	0.00255945	0.576	0.746	0.597301	0.742117	0.0177948	MIC not significant	FALSE	FALSE	FALSE	FALSE	FALSE	FALSE	FALSE	FALSE
orfmeanLenuORFs230C	3682	0.0858112	0.00331874	0.167	0.429	0.163708	0.429675	619	0.158035	5.32896e-05	0.184	0.152	0.189863	0.157382	0.856166	MIC not significant	FALSE	FALSE	FALSE	FALSE	FALSE	FALSE	FALSE	FALSE
orfmaxCostuORFs030C	3682	0.0919659	0.00335653	0.011	0.072	0.0100468	0.0704275	979	0.248434	0.160328	0	1	3.92063e-47	1	5.36643e-39	Monotone	TRUE	TRUE	FALSE	TRUE	TRUE	TRUE	FALSE	TRUE
orfmaxCostuORFs130C	3682	0.0907044	0.00752343	0.074	0.691	0.064539	0.697782	2194	0.0970786	0.000477117	0.826	0.818	0.820127	0.818484	0.306464	MIC not significant	FALSE	FALSE	FALSE	FALSE	FALSE	FALSE	FALSE	FALSE
orfmaxCostuORFs230C	3682	0.0858112	0.00331314	0.145	0.396	0.14042	0.413897	619	0.138851	7.48862e-05	0.844	0.804	0.840581	0.803957	0.829869	MIC not significant	FALSE	FALSE	FALSE	FALSE	FALSE	FALSE	FALSE	FALSE
orfmeanCostuORFs030C	3682	0.0959825	0.00336101	0.00119802	0.00894059	0.000390672	0.0059061	979	0.256433	0.160682	0	1	3.14513e-54	1	4.36127e-39	Monotone	TRUE	TRUE	FALSE	TRUE	TRUE	TRUE	FALSE	TRUE
orfmeanCostuORFs130C	3682	0.0906573	0.00621637	0.075	0.564	0.0726244	0.559416	2194	0.0979949	0.00185786	0.785	0.874	0.787094	0.86433	0.0435147	MIC not significant	FALSE	FALSE	FALSE	FALSE	FALSE	FALSE	FALSE	FALSE
orfmeanCostuORFs230C	3682	0.0858112	0.0032913	0.148	0.404	0.14724	0.416923	619	0.14171	0.000176537	0.759	0.72	0.766079	0.724907	0.741463	MIC not significant	FALSE	FALSE	FALSE	FALSE	FALSE	FALSE	FALSE	FALSE
orfuORFs0200C	3682	0.0982086	0.00830178	0.002	0.086	0.00014615	0.0778585	3415	0.0911654	0.00539369	0.142	0.592	0.141863	0.607798	1.73891e-05	MIC not significant	TRUE	FALSE	FALSE	FALSE	TRUE	FALSE	FALSE	FALSE
orfuORFs1200C	3682	0.115276	0.0460169	0	1	1.0748e-16	0.999992	3622	0.111783	0.0374093	0	0.999752	4.33544e-12	0.99927	7.28475e-32	Monotone	TRUE	TRUE	FALSE	TRUE	TRUE	TRUE	FALSE	TRUE
orfuORFs2200C	3682	0.094837	0.0169306	0.007	0.978	0.00289299	0.968492	2455	0.102308	0.0108108	0.209	0.911	0.199963	0.911691	2.42866e-07	MIC not significant	TRUE	FALSE	FALSE	FALSE	TRUE	FALSE	FALSE	FALSE
orfmaxLenuORFs0200C	3682	0.14166	0.0851258	0	1	4.06569e-54	1	3415	0.144874	0.0953542	0	1	1.25234e-51	1	2.37213e-76	Monotone	TRUE	TRUE	FALSE	TRUE	TRUE	TRUE	FALSE	TRUE
orfmaxLenuORFs1200C	3682	0.0909789	3.09891e-05	0.061	0.053	0.0524322	0.0468329	3622	0.091796	0.000505691	0.084	0.089	0.0736445	0.0820337	0.176032	MIC not significant	FALSE	FALSE	FALSE	FALSE	FALSE	FALSE	FALSE	FALSE
orfmaxLenuORFs2200C	3682	0.0911443	0.012216	0.055	0.944	0.0526453	0.951089	2455	0.092695	0.00358709	0.886	0.969	0.878443	0.965838	0.00299065	MIC not significant	FALSE	FALSE	FALSE	FALSE	FALSE	FALSE	FALSE	FALSE
orfmeanLenuORFs0200C	3682	0.143549	0.0839637	0	1	3.34328e-63	1	3415	0.147744	0.0939351	0	1	2.89195e-63	1	3.46803e-75	Monotone	TRUE	TRUE	FALSE	TRUE	TRUE	TRUE	FALSE	TRUE
orfmeanLenuORFs1200C	3682	0.0894369	0.004216	0.114	0.446	0.115318	0.456319	3622	0.0963038	0.00910676	0.006	0.378	0.00447839	0.391091	8.69586e-09	MIC not significant	FALSE	TRUE	FALSE	FALSE	FALSE	TRUE	FALSE	FALSE
orfmeanLenuORFs2200C	3682	0.0934597	0.00972212	0.015	0.635	0.0119005	0.638268	2455	0.0939596	0.00112456	0.798	0.834	0.806777	0.845104	0.0966764	MIC not significant	FALSE	FALSE	FALSE	FALSE	TRUE	FALSE	FALSE	FALSE
orfmaxCostuORFs0200C	3682	0.140937	0.0920353	0	1	4.98794e-67	1	3415	0.150799	0.103921	0	1	2.68929e-78	1	2.01839e-83	Monotone	TRUE	TRUE	FALSE	TRUE	TRUE	TRUE	FALSE	TRUE
orfmaxCostuORFs1200C	3682	0.0887559	0.000315749	0.155	0.158	0.159721	0.163256	3622	0.0881015	9.68518e-05	0.29	0.272	0.314536	0.297398	0.55379	MIC not significant	FALSE	FALSE	FALSE	FALSE	FALSE	FALSE	FALSE	FALSE
orfmaxCostuORFs2200C	3682	0.0956479	0.0124209	0.003	0.682	0.00284685	0.687616	2455	0.0909397	0.0038447	0.955	0.997	0.941228	0.988886	0.0021146	MIC not significant	TRUE	FALSE	FALSE	FALSE	TRUE	FALSE	FALSE	FALSE
orfmeanCostuORFs0200C	3682	0.150635	0.0903945	0	1	4.37024e-93	1	3415	0.15531	0.1019	0	1	1.9889e-89	1	9.51369e-82	Monotone	TRUE	TRUE	FALSE	TRUE	TRUE	TRUE	FALSE	TRUE
orfmeanCostuORFs1200C	3682	0.0894042	0.00240359	0.179	0.408	0.183798	0.413985	3622	0.0952574	0.00623295	0.013	0.33	0.0091846	0.334479	1.96316e-06	MIC not significant	FALSE	TRUE	FALSE	FALSE	FALSE	TRUE	FALSE	FALSE
orfmeanCostuORFs2200C	3682	0.0922623	0.00972942	0.046	0.735	0.0330561	0.733911	2455	0.0868794	0.00113287	0.998644	0.999347	0.995197	0.997019	0.0954514	MIC not significant	FALSE	FALSE	FALSE	FALSE	FALSE	FALSE	FALSE	FALSE
rorf5bestATG	3648	0.143986	0.0865664	0	1	6.68213e-71	1	3647	0.143635	0.0862667	0	1	5.43757e-70	1	1.75933e-73	Monotone	TRUE	TRUE	FALSE	TRUE	TRUE	TRUE	FALSE	TRUE
rorfMeanATG	3648	0.128866	0.0648298	0	1	8.93408e-39	1	3647	0.128674	0.0645561	0	1	1.82133e-38	1	7.83826e-55	Monotone	TRUE	TRUE	FALSE	TRUE	TRUE	TRUE	FALSE	TRUE
rorf5bestATG30C	3648	0.120778	0.0498671	0	1	1.19932e-25	1	3645	0.120761	0.049532	0	1	1.46711e-25	1	3.84239e-42	Monotone	TRUE	TRUE	FALSE	TRUE	TRUE	TRUE	FALSE	TRUE
rorfMeanATG30C	3648	0.117209	0.0491475	0	1	7.91761e-21	1	3645	0.117133	0.0488142	0	1	1.67603e-20	1	1.53099e-41	Monotone	TRUE	TRUE	FALSE	TRUE	TRUE	TRUE	FALSE	TRUE
rorf5bestATG200C	3648	0.119303	0.0589705	0	1	1.67076e-23	1	3647	0.119094	0.0587039	0	1	2.41843e-23	1	7.0956e-50	Monotone	TRUE	TRUE	FALSE	TRUE	TRUE	TRUE	FALSE	TRUE
rorfMeanATG200C	3648	0.115759	0.0527446	0	1	7.75606e-19	1	3647	0.115471	0.0524892	0	1	1.26848e-18	1	1.21212e-44	Monotone	TRUE	TRUE	FALSE	TRUE	TRUE	TRUE	FALSE	TRUE
rorfbestATG0	3648	0.145924	0.09099	0	1	5.48879e-76	1	3647	0.145615	0.0907228	0	1	1.35143e-75	1	2.31775e-77	Monotone	TRUE	TRUE	FALSE	TRUE	TRUE	TRUE	FALSE	TRUE
rorfMeanATG0	3648	0.13679	0.0748547	0	1	1.50244e-54	1	3647	0.136561	0.0746014	0	1	1.49734e-53	1	2.07739e-63	Monotone	TRUE	TRUE	FALSE	TRUE	TRUE	TRUE	FALSE	TRUE
rorfbestATG1	3648	0.142262	0.0912557	0	1	4.84837e-67	1	3648	0.142262	0.0912557	0	1	8.31872e-67	1	7.56639e-78	Monotone	TRUE	TRUE	FALSE	TRUE	TRUE	TRUE	FALSE	TRUE
rorfMeanATG1	3648	0.13022	0.0708983	0	1	2.96832e-41	1	3648	0.13022	0.0708983	0	1	2.4209e-41	1	2.97488e-60	Monotone	TRUE	TRUE	FALSE	TRUE	TRUE	TRUE	FALSE	TRUE
rorfbestATG2	3648	0.144361	0.103247	0	1	8.53823e-72	1	3647	0.144483	0.10305	0	1	1.30664e-71	1	3.41983e-88	Monotone	TRUE	TRUE	FALSE	TRUE	TRUE	TRUE	FALSE	TRUE
rorfMeanATG2	3648	0.137026	0.0916028	0	1	9.32005e-55	1	3647	0.137095	0.0914094	0	1	7.92874e-55	1	5.82742e-78	Monotone	TRUE	TRUE	FALSE	TRUE	TRUE	TRUE	FALSE	TRUE
rorfbestATG030C	3648	0.109431	0.0272691	0	0.955386	2.4102e-12	0.945109	3647	0.109264	0.0271376	0	0.956891	3.83754e-12	0.947563	1.32998e-23	Monotone	TRUE	TRUE	FALSE	FALSE	TRUE	TRUE	FALSE	FALSE
rorfMeanATG030C	3648	0.107545	0.0273815	0	0.99205	1.24263e-10	0.986976	3647	0.107325	0.0272498	0	0.99347	2.46715e-10	0.987986	1.0757e-23	Monotone	TRUE	TRUE	FALSE	TRUE	TRUE	TRUE	FALSE	TRUE
rorfbestATG130C	3648	0.11065	0.0423582	0	1	1.93278e-13	1	3645	0.110675	0.0420379	0	1	2.76884e-13	1	6.80189e-36	Monotone	TRUE	TRUE	FALSE	TRUE	TRUE	TRUE	FALSE	TRUE
rorfMeanATG130C	3648	0.114743	0.0420016	0	1	1.10126e-17	0.999999	3645	0.114765	0.0416822	0	1	1.04147e-17	0.999998	1.34322e-35	Monotone	TRUE	TRUE	FALSE	TRUE	TRUE	TRUE	FALSE	TRUE
rorfbestATG230C	3648	0.111882	0.0412211	0	1	7.48462e-15	1	3647	0.111639	0.0410655	0	1	1.51432e-14	1	4.18759e-35	Monotone	TRUE	TRUE	FALSE	TRUE	TRUE	TRUE	FALSE	TRUE
rorfMeanATG230C	3648	0.111882	0.041204	0	1	8.55671e-15	1	3647	0.111639	0.0410483	0	1	1.51207e-14	1	4.32711e-35	Monotone	TRUE	TRUE	FALSE	TRUE	TRUE	TRUE	FALSE	TRUE
rorfbestATG0200C	3648	0.108658	0.0356132	0	1	2.86572e-11	0.999998	3647	0.108389	0.0354146	0	1	4.76148e-11	0.999999	2.01468e-30	Monotone	TRUE	TRUE	FALSE	TRUE	TRUE	TRUE	FALSE	TRUE
rorfMeanATG0200C	3648	0.11271	0.035306	0	0.999901	2.40854e-15	0.99948	3647	0.112344	0.0351086	0	0.99993	7.76644e-15	0.999556	3.60651e-30	Monotone	TRUE	TRUE	FALSE	TRUE	TRUE	TRUE	FALSE	TRUE
rorfbestATG1200C	3648	0.131266	0.0664946	0	1	6.11242e-43	1	3648	0.131266	0.0664946	0	1	9.13592e-43	1	1.70194e-56	Monotone	TRUE	TRUE	FALSE	TRUE	TRUE	TRUE	FALSE	TRUE
rorfMeanATG1200C	3648	0.125373	0.0604224	0	1	1.21139e-32	1	3648	0.125373	0.0604224	0	1	8.69885e-33	1	2.42526e-51	Monotone	TRUE	TRUE	FALSE	TRUE	TRUE	TRUE	FALSE	TRUE
rorfbestATG2200C	3648	0.107265	0.0383404	0	1	4.24818e-10	1	3647	0.10707	0.0381892	9.90099e-06	1	7.06305e-10	1	1.01871e-32	Monotone	TRUE	TRUE	FALSE	TRUE	TRUE	TRUE	FALSE	TRUE
rorfMeanATG2200C	3648	0.107519	0.0379903	0	1	2.74922e-10	1	3647	0.107374	0.0378396	0	1	3.66009e-10	1	1.9843e-32	Monotone	TRUE	TRUE	FALSE	TRUE	TRUE	TRUE	FALSE	TRUE
orftAI	3682	0.293563	0.306211	0	1	0	1	3682	0.293563	0.306211	0	1	0	1	1.71246e-294	Monotone	TRUE	TRUE	FALSE	TRUE	TRUE	TRUE	FALSE	TRUE
orfCAI	3682	0.267123	0.24132	0	1	0	1	3682	0.267123	0.24132	0	1	0	1	5.43566e-223	Monotone	TRUE	TRUE	FALSE	TRUE	TRUE	TRUE	FALSE	TRUE
scATGcs	3648	0.110526	0.0482833	0	1	1.32299e-13	1	3648	0.110526	0.0482833	0	1	1.21074e-13	1	3.94771e-41	Monotone	TRUE	TRUE	FALSE	TRUE	TRUE	TRUE	FALSE	TRUE
TASEPCsct	3682	0.200802	0.171057	0	1	1.59573e-287	1	3682	0.200802	0.171057	0	1	1.08643e-289	1	3.86487e-152	Monotone	TRUE	TRUE	FALSE	TRUE	TRUE	TRUE	FALSE	TRUE
orf_PARS_numBP_all	2342	0.1229	0.0165948	9.90099e-06	0.0893663	1.51086e-07	0.0839044	2342	0.1229	0.0165948	2.83019e-05	0.0897075	1.60621e-07	0.0847879	3.9262e-10	non-significant monotone/non-monotone	TRUE	TRUE	FALSE	FALSE	TRUE	TRUE	FALSE	FALSE
orfdn	2175	0.192306	0.145402	0	1	3.73599e-84	1	2170	0.192013	0.142944	0	1	7.76273e-84	1	1.08876e-74	Monotone	TRUE	TRUE	FALSE	TRUE	TRUE	TRUE	FALSE	TRUE
orfdsAdj	2175	0.109133	0.00560082	0.148	0.532	0.151719	0.53886	2175	0.109133	0.00560082	0.139	0.534	0.150367	0.549544	0.000477386	MIC not significant	FALSE	FALSE	FALSE	FALSE	FALSE	FALSE	FALSE	FALSE
orfdn_dsAdj	2175	0.19848	0.145156	0	1	1.08605e-96	1	2170	0.196281	0.1427	0	1	3.31669e-91	1	1.48451e-74	Monotone	TRUE	TRUE	FALSE	TRUE	TRUE	TRUE	FALSE	TRUE
utr3gc	3682	0.0807361	0.00102895	0.895	0.925	0.89399	0.927346	3666	0.0801083	0.00128032	0.94	0.968	0.929917	0.958781	0.0302776	MIC not significant	FALSE	FALSE	FALSE	FALSE	FALSE	FALSE	FALSE	FALSE
utr3gc40	3682	0.0801605	0.000797085	0.918	0.938	0.913244	0.933979	3666	0.0804472	0.000631596	0.936	0.952	0.927472	0.940109	0.128166	MIC not significant	FALSE	FALSE	FALSE	FALSE	FALSE	FALSE	FALSE	FALSE
utr3meanFE	3405	0.0938605	0.00715671	0.094	0.786	0.0942801	0.776149	3405	0.0938605	0.00715671	0.107	0.791	0.101203	0.780161	7.6729e-07	MIC not significant	FALSE	FALSE	FALSE	FALSE	FALSE	FALSE	FALSE	FALSE
utr3meanFE40	3405	0.0916455	0.000937789	0.148	0.186	0.144044	0.185197	3405	0.0916455	0.000937789	0.129	0.18	0.137152	0.178438	0.0739848	MIC not significant	FALSE	FALSE	FALSE	FALSE	FALSE	FALSE	FALSE	FALSE
utr3bestATG	3682	0.0839371	0.000341331	0.677	0.69	0.676033	0.684971	2966	0.0857891	0.00024421	0.983	0.982	0.972732	0.971302	0.394899	MIC not significant	FALSE	FALSE	FALSE	FALSE	FALSE	FALSE	FALSE	FALSE
utr3MeanATG	3682	0.0824956	0.000343071	0.878	0.889	0.86759	0.87256	2966	0.0897991	0.000245738	0.895	0.894	0.879965	0.875438	0.393423	MIC not significant	FALSE	FALSE	FALSE	FALSE	FALSE	FALSE	FALSE	FALSE
utr3bestATG0	3682	0.0923603	0.000445074	0.031	0.035	0.0200696	0.0226301	1836	0.115233	0.00204779	0.124	0.187	0.114595	0.184281	0.0525406	MIC not significant	FALSE	FALSE	FALSE	FALSE	FALSE	FALSE	FALSE	FALSE
utr3MeanATG0	3682	0.0923603	0.000491714	0.029	0.03	0.0212987	0.0241358	1836	0.109478	0.00243271	0.523	0.665	0.543881	0.684742	0.0345797	MIC not significant	FALSE	FALSE	FALSE	FALSE	FALSE	FALSE	FALSE	FALSE
utr3bestATG1	3682	0.0822832	1.0844e-06	0.801	0.778	0.806761	0.786062	1741	0.103507	4.62811e-07	0.894	0.879	0.886292	0.865561	0.977371	MIC not significant	FALSE	FALSE	FALSE	FALSE	FALSE	FALSE	FALSE	FALSE
utr3MeanATG1	3682	0.0822832	4.45419e-06	0.79	0.752	0.788054	0.766057	1741	0.101957	2.56166e-05	0.96	0.952	0.944981	0.932529	0.832861	MIC not significant	FALSE	FALSE	FALSE	FALSE	FALSE	FALSE	FALSE	FALSE
utr3bestATG2	3682	0.0870031	2.23095e-05	0.308	0.282	0.313433	0.29011	1782	0.103788	0.000722654	0.905	0.912	0.892686	0.899572	0.256707	MIC not significant	FALSE	FALSE	FALSE	FALSE	FALSE	FALSE	FALSE	FALSE
utr3MeanATG2	3682	0.0870031	3.86635e-05	0.288	0.276	0.319012	0.296716	1782	0.108264	0.000439013	0.673	0.659	0.685092	0.677411	0.376715	MIC not significant	FALSE	FALSE	FALSE	FALSE	FALSE	FALSE	FALSE	FALSE
utr3numATGs	3682	0.0886973	0.000141872	0.168	0.164	0.172808	0.164021	2966	0.0855602	3.05129e-05	0.948	0.938	0.932095	0.923351	0.763636	MIC not significant	FALSE	FALSE	FALSE	FALSE	FALSE	FALSE	FALSE	FALSE
utr3numATGs0	3682	0.0923603	3.51272e-05	0.028	0.026	0.0247652	0.020897	1836	0.118039	0.000199165	0.023	0.019	0.0234517	0.0204037	0.54563	Non-monotone	FALSE	FALSE	FALSE	FALSE	FALSE	FALSE	FALSE	FALSE
utr3numATGs1	3682	0.0822832	5.16051e-06	0.793	0.772	0.804212	0.783968	1741	0.111194	0.000216424	0.236	0.218	0.24859	0.228044	0.539593	MIC not significant	FALSE	FALSE	FALSE	FALSE	FALSE	FALSE	FALSE	FALSE
utr3numATGs2	3682	0.0870031	3.70141e-05	0.302	0.285	0.31218	0.287561	1782	0.107069	0.000630017	0.485	0.491	0.499538	0.501584	0.289602	MIC not significant	FALSE	FALSE	FALSE	FALSE	FALSE	FALSE	FALSE	FALSE
utr3distATG	3682	0.144206	0.0497134	0	0.00711881	1.19259e-60	0.00421737	2966	0.171863	0.109317	0	1	4.89412e-87	1	1.36569e-76	Monotone	TRUE	TRUE	FALSE	TRUE	TRUE	TRUE	FALSE	TRUE
utr3distATG0	3682	0.102249	0.00962019	9.90099e-06	0.0222673	1.51491e-06	0.0177483	1836	0.17847	0.110756	0	1	1.19071e-35	1	9.9656e-49	Monotone	TRUE	TRUE	FALSE	TRUE	TRUE	TRUE	FALSE	TRUE
utr3distATG1	3682	0.0959063	0.00622303	0.004	0.096	0.00160647	0.0918583	1741	0.18025	0.104389	0	1	3.41134e-35	1	1.374e-43	Monotone	TRUE	TRUE	FALSE	TRUE	TRUE	TRUE	FALSE	TRUE
utr3distATG2	3682	0.101161	0.00842082	3.9604e-05	0.0212376	6.66068e-06	0.0166994	1782	0.177115	0.101597	0	1	1.44517e-32	1	2.29268e-43	Monotone	TRUE	TRUE	FALSE	TRUE	TRUE	TRUE	FALSE	TRUE
utr3Lens	3682	0.085501	0.0042755	0.466	0.846	0.477216	0.845579	3668	0.0865963	0.00401204	0.379	0.75	0.385518	0.762486	0.00012368	MIC not significant	FALSE	FALSE	FALSE	FALSE	FALSE	FALSE	FALSE	FALSE
utr3uORFs	3682	0.087787	0.000894057	0.215	0.265	0.217284	0.270653	1370	0.123819	9.55707e-05	0.208	0.185	0.211358	0.18799	0.717708	MIC not significant	FALSE	FALSE	FALSE	FALSE	FALSE	FALSE	FALSE	FALSE
u3maxLenuORFs	3682	0.087787	0.000919736	0.197	0.246	0.212037	0.264679	1370	0.128856	3.10892e-05	0.07	0.055	0.0635957	0.050791	0.836641	MIC not significant	FALSE	FALSE	FALSE	FALSE	FALSE	FALSE	FALSE	FALSE
u3meanLenuORFs	3682	0.087787	0.0010211	0.176	0.239	0.184261	0.248544	1370	0.127437	2.53066e-05	0.115	0.097	0.108869	0.0912388	0.852421	MIC not significant	FALSE	FALSE	FALSE	FALSE	FALSE	FALSE	FALSE	FALSE
u3maxCostuORFs	3682	0.087787	0.000964374	0.201	0.267	0.201164	0.257807	1370	0.129432	7.04477e-07	0.056	0.043	0.0556765	0.041517	0.975239	MIC not significant	FALSE	FALSE	FALSE	FALSE	FALSE	FALSE	FALSE	FALSE
u3meanCostuORFs	3682	0.087787	0.00111456	0.215	0.291	0.229389	0.301963	1370	0.123761	0.000202692	0.214	0.192	0.236569	0.213371	0.598536	MIC not significant	FALSE	FALSE	FALSE	FALSE	FALSE	FALSE	FALSE	FALSE
utr3uORFs0	3682	0.0847293	1.66186e-07	0.454	0.423	0.469518	0.438927	1178	0.114357	0.000324943	0.77	0.738	0.772967	0.747335	0.536517	MIC not significant	FALSE	FALSE	FALSE	FALSE	FALSE	FALSE	FALSE	FALSE
utr3uORFs1	3682	0.0840759	0.000122203	0.492	0.477	0.513538	0.496678	1111	0.129878	0.00135772	0.199	0.203	0.187419	0.200771	0.219741	MIC not significant	FALSE	FALSE	FALSE	FALSE	FALSE	FALSE	FALSE	FALSE
utr3uORFs2	3682	0.0833026	0.000235103	0.616	0.615	0.624703	0.621166	1170	0.124844	0.00139984	0.303	0.335	0.322943	0.351263	0.200949	MIC not significant	FALSE	FALSE	FALSE	FALSE	FALSE	FALSE	FALSE	FALSE
u3maxLenuORFs0	3682	0.0847293	2.13687e-06	0.449	0.424	0.468739	0.436837	1178	0.124493	4.67246e-05	0.325	0.299	0.356939	0.323471	0.814703	MIC not significant	FALSE	FALSE	FALSE	FALSE	FALSE	FALSE	FALSE	FALSE
u3maxLenuORFs1	3682	0.0840759	0.000183399	0.475	0.464	0.505754	0.495846	1111	0.123806	6.06189e-05	0.485	0.444	0.507037	0.465767	0.795461	MIC not significant	FALSE	FALSE	FALSE	FALSE	FALSE	FALSE	FALSE	FALSE
u3maxLenuORFs2	3682	0.0833026	0.00022928	0.616	0.604	0.617168	0.61327	1170	0.118338	0.00108693	0.671	0.672	0.684174	0.691944	0.259827	MIC not significant	FALSE	FALSE	FALSE	FALSE	FALSE	FALSE	FALSE	FALSE
u3meanLenuORFs0	3682	0.0847293	7.83774e-06	0.432	0.407	0.462895	0.436292	1178	0.11561	1.75654e-05	0.75	0.719	0.762266	0.727136	0.885741	MIC not significant	FALSE	FALSE	FALSE	FALSE	FALSE	FALSE	FALSE	FALSE
u3meanLenuORFs1	3682	0.0840759	0.000213262	0.498	0.5	0.50879	0.501079	1111	0.125833	2.45059e-06	0.411	0.363	0.435388	0.393173	0.958433	MIC not significant	FALSE	FALSE	FALSE	FALSE	FALSE	FALSE	FALSE	FALSE
u3meanLenuORFs2	3682	0.0833026	0.000268729	0.608	0.61	0.610479	0.610099	1170	0.128725	0.000512225	0.207	0.189	0.215684	0.20157	0.439275	MIC not significant	FALSE	FALSE	FALSE	FALSE	FALSE	FALSE	FALSE	FALSE
u3maxCostuORFs0	3682	0.0847293	1.10378e-05	0.48	0.455	0.485815	0.458768	1178	0.127996	6.82428e-05	0.219	0.191	0.240442	0.207481	0.776997	MIC not significant	FALSE	FALSE	FALSE	FALSE	FALSE	FALSE	FALSE	FALSE
u3maxCostuORFs1	3682	0.0840759	0.000214107	0.524	0.522	0.547255	0.542307	1111	0.132432	3.90027e-06	0.172	0.15	0.178206	0.145538	0.947574	MIC not significant	FALSE	FALSE	FALSE	FALSE	FALSE	FALSE	FALSE	FALSE
u3maxCostuORFs2	3682	0.0833026	0.000246301	0.587	0.592	0.603667	0.603045	1170	0.119221	0.0008076	0.667	0.661	0.691175	0.686969	0.331442	MIC not significant	FALSE	FALSE	FALSE	FALSE	FALSE	FALSE	FALSE	FALSE
u3meanCostuORFs0	3682	0.0847293	1.96659e-05	0.45	0.423	0.462001	0.43595	1178	0.131603	0.000304428	0.108	0.095	0.106932	0.0950018	0.549669	MIC not significant	FALSE	FALSE	FALSE	FALSE	FALSE	FALSE	FALSE	FALSE
u3meanCostuORFs1	3682	0.0840759	0.000249158	0.482	0.475	0.498761	0.494211	1111	0.128639	0.000147719	0.311	0.28	0.326126	0.29184	0.685719	MIC not significant	FALSE	FALSE	FALSE	FALSE	FALSE	FALSE	FALSE	FALSE
u3meanCostuORFs2	3682	0.0833026	0.000291434	0.599	0.6	0.61188	0.615278	1170	0.121697	0.000291405	0.579	0.547	0.592659	0.564036	0.559676	MIC not significant	FALSE	FALSE	FALSE	FALSE	FALSE	FALSE	FALSE	FALSE
rutr3bestATG	3648	0.0943447	0.0110347	0.028	0.935	0.0193344	0.916798	3647	0.0944423	0.0110515	0.021	0.915	0.0181729	0.908013	1.96475e-10	non-significant monotone/non-monotone	FALSE	FALSE	FALSE	FALSE	FALSE	TRUE	FALSE	FALSE
rutr3MeanATG	3648	0.0922275	0.0121664	0.101	0.997	0.097567	0.99254	3647	0.0922298	0.0121845	0.0924554	0.996564	0.0884001	0.992506	2.32108e-11	MIC not significant	FALSE	FALSE	FALSE	FALSE	FALSE	FALSE	FALSE	FALSE
rutr3bestATG0	3648	0.094498	0.00659269	0.025	0.409	0.0141524	0.445563	3647	0.0945059	0.00660414	0.023	0.445	0.0198269	0.46217	8.91799e-07	non-significant monotone/non-monotone	FALSE	FALSE	FALSE	FALSE	TRUE	FALSE	FALSE	FALSE
rutr3MeanATG0	3648	0.0953405	0.00673252	0.014	0.319	0.00646564	0.347448	3647	0.0953487	0.00674416	0.022	0.345	0.0115217	0.375923	6.83062e-07	non-significant monotone/non-monotone	TRUE	FALSE	FALSE	FALSE	TRUE	TRUE	FALSE	FALSE
rutr3bestATG1	3648	0.100187	0.0104425	0.000465347	0.225218	3.98951e-05	0.234182	3647	0.100197	0.0103542	0.000416667	0.221042	4.37419e-05	0.228697	7.32295e-10	non-significant monotone/non-monotone	TRUE	TRUE	FALSE	FALSE	TRUE	TRUE	FALSE	FALSE
rutr3MeanATG1	3648	0.0969964	0.0105519	0.002	0.618	0.00125226	0.626994	3647	0.0970055	0.0104632	0.004	0.585	0.00229892	0.616123	5.9616e-10	non-significant monotone/non-monotone	TRUE	TRUE	FALSE	FALSE	TRUE	TRUE	FALSE	FALSE
rutr3bestATG2	3648	0.0998987	0.00898869	0.000465347	0.139604	6.13686e-05	0.139275	3647	0.0996961	0.00890608	0.00046875	0.150042	8.22734e-05	0.15041	1.13004e-08	non-significant monotone/non-monotone	TRUE	TRUE	FALSE	FALSE	TRUE	TRUE	FALSE	FALSE
rutr3MeanATG2	3648	0.0974485	0.00908333	0.001	0.352	0.00103918	0.370547	3647	0.0974282	0.00900038	0.005	0.368	0.000951424	0.407662	9.45408e-09	non-significant monotone/non-monotone	TRUE	TRUE	FALSE	FALSE	TRUE	TRUE	FALSE	FALSE
utr3_PARS_numBP_all	2338	0.100211	0.00242317	0.409	0.557	0.418508	0.578113	1930	0.104427	0.000829704	0.533	0.566	0.559911	0.585336	0.205915	MIC not significant	FALSE	FALSE	FALSE	FALSE	FALSE	FALSE	FALSE	FALSE
utr5MeanPARS	2342	0.131655	0.0081397	0	1.9802e-05	1.19798e-12	9.13671e-08	2342	0.131655	0.0081397	0	1.96078e-05	1.14005e-12	9.16128e-08	1.22703e-05	Non-monotone	TRUE	TRUE	TRUE	FALSE	TRUE	TRUE	TRUE	FALSE
orfMeanPARS	2342	0.234122	0.205333	0	1	7.56462e-212	1	2342	0.234122	0.205333	0	1	8.21186e-213	1	0	Monotone	TRUE	TRUE	FALSE	TRUE	TRUE	TRUE	FALSE	TRUE
utr3MeanPARS	2338	0.119217	0.0111199	0.000257426	0.0580594	1.85944e-05	0.0511356	2338	0.119217	0.0111199	0.000287129	0.0582475	1.76564e-05	0.0504123	3.2152e-07	non-significant monotone/non-monotone	TRUE	TRUE	FALSE	FALSE	TRUE	TRUE	FALSE	FALSE
seqMeanPARS	2342	0.216537	0.174762	0	1	5.68711e-159	1	2342	0.216537	0.174762	0	1	1.23552e-159	1	0	Monotone	TRUE	TRUE	FALSE	TRUE	TRUE	TRUE	FALSE	TRUE
wutr5MeanPARS	2342	0.160993	0.106101	0	1	2.25836e-44	1	2342	0.160993	0.106101	0	1	1.55685e-44	1	5.131e-59	Monotone	TRUE	TRUE	FALSE	TRUE	TRUE	TRUE	FALSE	TRUE
worfMeanPARS	2342	0.254678	0.290155	0	1	3.13949e-280	1	2342	0.254678	0.290155	0	1	1.47248e-280	1	0	Monotone	TRUE	TRUE	FALSE	TRUE	TRUE	TRUE	FALSE	TRUE
wutr3MeanPARS	2338	0.148844	0.0923781	0	1	1.04647e-28	1	2338	0.148844	0.0923781	0	1	1.30728e-28	1	3.682e-51	Monotone	TRUE	TRUE	FALSE	TRUE	TRUE	TRUE	FALSE	TRUE
wseqMeanPARS	2342	0.251316	0.271705	0	1	1.90528e-269	1	2342	0.251316	0.271705	0	1	1.78436e-268	1	0	Monotone	TRUE	TRUE	FALSE	TRUE	TRUE	TRUE	FALSE	TRUE
pars40	2342	0.149806	0.0640981	0	1	3.96e-30	0.999826	2342	0.149806	0.0640981	0	0.99999	4.007e-30	0.999822	1.41484e-35	Monotone	TRUE	TRUE	FALSE	TRUE	TRUE	TRUE	FALSE	TRUE
u540pars	2342	0.122351	0.00311559	0.001	0.001	4.57483e-07	9.73604e-06	2342	0.122351	0.00311559	9.90099e-06	0.000178218	4.69808e-07	9.29227e-06	0.0068943	Non-monotone	TRUE	TRUE	TRUE	FALSE	TRUE	TRUE	TRUE	FALSE
u540pars40	2342	0.143119	0.0574976	0	1	1.27334e-22	0.999875	2342	0.143119	0.0574976	0	1	1.66603e-22	0.999874	5.55823e-32	Monotone	TRUE	TRUE	FALSE	TRUE	TRUE	TRUE	FALSE	TRUE
u5pars40	2342	0.154644	0.0669275	0	0.999941	8.8764e-36	0.99932	2342	0.154644	0.0669275	0	0.99991	1.28285e-35	0.999275	4.00804e-37	Monotone	TRUE	TRUE	FALSE	TRUE	TRUE	TRUE	FALSE	TRUE
u5parsOrf	2342	0.219235	0.198525	0	1	2.99982e-166	1	2342	0.219235	0.198525	0	1	3.59971e-166	1	0	Monotone	TRUE	TRUE	FALSE	TRUE	TRUE	TRUE	FALSE	TRUE
wpars40	2342	0.183804	0.165784	0	1	1.92516e-83	1	2342	0.183804	0.165784	0	1	2.42413e-82	1	3.17796e-94	Monotone	TRUE	TRUE	FALSE	TRUE	TRUE	TRUE	FALSE	TRUE
wu540pars	2342	0.150848	0.0838479	0	1	7.01719e-31	1	2342	0.150848	0.0838479	0	1	4.91095e-31	1	1.80136e-46	Monotone	TRUE	TRUE	FALSE	TRUE	TRUE	TRUE	FALSE	TRUE
wu540pars40	2342	0.191469	0.182053	0	1	3.50139e-98	1	2342	0.191469	0.182053	0	1	1.02398e-98	1	0	Monotone	TRUE	TRUE	FALSE	TRUE	TRUE	TRUE	FALSE	TRUE
wu5pars40	2342	0.190711	0.191627	0	1	1.165e-96	1	2342	0.190711	0.191627	0	1	1.01473e-96	1	0	Monotone	TRUE	TRUE	FALSE	TRUE	TRUE	TRUE	FALSE	TRUE
wu5parsOrf	2342	0.256909	0.287555	0	1	1.53357e-287	1	2342	0.256909	0.287555	0	1	5.87713e-290	1	0	Monotone	TRUE	TRUE	FALSE	TRUE	TRUE	TRUE	FALSE	TRUE
r5utrOrf	3682	0.102756	0.0212332	1.9802e-05	0.952129	1.74491e-07	0.942226	3682	0.102756	0.0212332	0	0.952475	1.71946e-07	0.942912	6.30923e-19	Monotone	TRUE	TRUE	FALSE	FALSE	TRUE	TRUE	FALSE	FALSE
r3utrOrf	3682	0.131968	0.0756232	0	1	3.49353e-47	1	3668	0.131464	0.0754134	0	1	2.82439e-45	1	1.82626e-64	Monotone	TRUE	TRUE	FALSE	TRUE	TRUE	TRUE	FALSE	TRUE
r5utr3utr	3668	0.101131	0.0151915	0.001	0.466	3.93252e-06	0.49119	3668	0.101131	0.0151915	0.000104167	0.48426	3.09362e-06	0.50501	6.13909e-14	non-significant monotone/non-monotone	TRUE	TRUE	FALSE	FALSE	TRUE	TRUE	FALSE	FALSE
allLens	3682	0.170562	0.114787	0	1	9.68479e-129	1	3682	0.170562	0.114787	0	1	1.65401e-128	1	1.43109e-99	Monotone	TRUE	TRUE	FALSE	TRUE	TRUE	TRUE	FALSE	TRUE
all_PARS_numBP_all	2342	0.12963	0.0339443	0	0.893564	1.83631e-11	0.886913	2342	0.12963	0.0339443	0	0.893	1.55809e-11	0.886533	2.50793e-19	non-significant monotone/non-monotone	TRUE	TRUE	FALSE	FALSE	TRUE	TRUE	FALSE	FALSE
allgc	3682	0.119929	0.0562051	0	1	4.43486e-26	1	3682	0.119929	0.0562051	0	1	2.97234e-26	1	3.28828e-48	Monotone	TRUE	TRUE	FALSE	TRUE	TRUE	TRUE	FALSE	TRUE
utr540orf40gc	3682	0.0907045	0.00167642	0.063	0.119	0.0593614	0.122487	3682	0.0907045	0.00167642	0.079	0.144	0.0727919	0.139103	0.0129673	MIC not significant	FALSE	FALSE	FALSE	FALSE	FALSE	FALSE	FALSE	FALSE
utr5orf40gc	3682	0.094293	0.000438169	0.013	0.014	0.00651283	0.00751091	3682	0.094293	0.000438169	0.017	0.018	0.00619564	0.00713697	0.204127	Non-monotone	TRUE	FALSE	FALSE	FALSE	TRUE	TRUE	FALSE	FALSE
utr5orfgc	3682	0.146765	0.115989	0	1	4.06838e-81	1	3682	0.146765	0.115989	0	1	3.10213e-81	1	1.16884e-100	Monotone	TRUE	TRUE	FALSE	TRUE	TRUE	TRUE	FALSE	TRUE
orf40utr340gc	3682	0.0852007	0.00749621	0.52	0.984	0.527357	0.979582	3682	0.0852007	0.00749621	0.487	0.98	0.493564	0.972669	1.42676e-07	MIC not significant	FALSE	FALSE	FALSE	FALSE	FALSE	FALSE	FALSE	FALSE
orf40utr3gc	3682	0.0786608	0.000106815	0.967	0.96	0.959068	0.954945	3682	0.0786608	0.000106815	0.973	0.967	0.971367	0.968497	0.530703	MIC not significant	FALSE	FALSE	FALSE	FALSE	FALSE	FALSE	FALSE	FALSE
orfutr3gc	3682	0.12621	0.0666568	0	1	1.78823e-36	1	3682	0.12621	0.0666568	0	1	1.26618e-36	1	3.81513e-57	Monotone	TRUE	TRUE	FALSE	TRUE	TRUE	TRUE	FALSE	TRUE
allmeanFE	3682	0.117735	0.0338818	0	0.849049	1.16126e-22	0.846832	3682	0.117735	0.0338818	0	0.847099	1.24569e-22	0.845761	2.02464e-29	non-significant monotone/non-monotone	TRUE	TRUE	FALSE	FALSE	TRUE	TRUE	FALSE	FALSE
utr540orf40FE	3682	0.095666	0.0102715	0.009	0.495	0.00338932	0.496994	3682	0.095666	0.0102715	0.004	0.453	0.00277124	0.4703	7.11276e-10	non-significant monotone/non-monotone	TRUE	TRUE	FALSE	FALSE	TRUE	TRUE	FALSE	FALSE
utr5orf40FE	3682	0.0995584	0.0160524	0.000247525	0.801347	1.84641e-05	0.802471	3682	0.0995584	0.0160524	0.000175258	0.802773	1.8636e-05	0.804461	1.19586e-14	non-significant monotone/non-monotone	TRUE	TRUE	FALSE	FALSE	TRUE	TRUE	FALSE	FALSE
utr5orfFE	3682	0.137223	0.0661916	0	1	1.53678e-57	1	3682	0.137223	0.0661916	0	1	1.30409e-57	1	9.57725e-57	Monotone	TRUE	TRUE	FALSE	TRUE	TRUE	TRUE	FALSE	TRUE
utr530Corf30CbestATG	3682	0.105409	0.0329633	0	1	1.5557e-09	0.999961	2911	0.0967429	0.0112722	0.215	0.993	0.220708	0.986937	9.35218e-09	MIC not significant	TRUE	FALSE	FALSE	FALSE	TRUE	FALSE	FALSE	FALSE
utr530Corf30CmeanATG	3682	0.100251	0.0292401	7.44681e-05	1	6.34924e-06	0.999997	2911	0.0978387	0.00799485	0.167	0.882	0.170934	0.861748	1.3529e-06	MIC not significant	TRUE	FALSE	FALSE	FALSE	TRUE	FALSE	FALSE	FALSE
utr530Corf30CbestATG0	3682	0.0904856	0.0045665	0.058	0.273	0.0447126	0.284059	1078	0.130225	0.00188723	0.538	0.578	0.560808	0.609375	0.154055	MIC not significant	FALSE	FALSE	FALSE	FALSE	FALSE	FALSE	FALSE	FALSE
utr530Corf30CmeanATG0	3682	0.0904856	0.00458647	0.049	0.26	0.0374007	0.273672	1078	0.134347	0.00201518	0.346	0.404	0.373473	0.427421	0.140771	MIC not significant	FALSE	FALSE	FALSE	FALSE	FALSE	FALSE	FALSE	FALSE
utr530Corf30CbestATG1	3682	0.0973014	0.0230246	0.001	1	0.00036079	0.998855	2271	0.106523	0.00638723	0.158	0.624	0.152221	0.646246	0.000137513	MIC not significant	TRUE	FALSE	FALSE	FALSE	TRUE	FALSE	FALSE	FALSE
utr530Corf30CmeanATG1	3682	0.0972855	0.0216423	0.001	0.999	0.000191983	0.997853	2271	0.104101	0.00464801	0.373	0.725	0.388533	0.738338	0.00115025	MIC not significant	TRUE	FALSE	FALSE	FALSE	TRUE	FALSE	FALSE	FALSE
utr530Corf30CbestATG2	3682	0.0967116	0.0154307	0.00019802	0.627782	6.01323e-05	0.637887	772	0.150141	0.00277642	0.324	0.384	0.340949	0.405413	0.143555	MIC not significant	TRUE	FALSE	FALSE	FALSE	TRUE	FALSE	FALSE	FALSE
utr530Corf30CmeanATG2	3682	0.0967116	0.0153503	0.000227723	0.620792	6.39576e-05	0.631148	772	0.155684	0.00216486	0.169	0.183	0.166829	0.189982	0.196572	MIC not significant	TRUE	FALSE	FALSE	FALSE	TRUE	FALSE	FALSE	FALSE
utr330Corf30CbestATG	3682	0.0864762	0.00083261	0.417	0.485	0.442893	0.509629	3144	0.0871905	0.00071766	0.923	0.941	0.903585	0.921865	0.133154	MIC not significant	FALSE	FALSE	FALSE	FALSE	FALSE	FALSE	FALSE	FALSE
utr330Corf30CmeanATG	3682	0.0863622	0.000478199	0.469	0.491	0.502	0.528672	3144	0.0929689	0.000296318	0.394	0.395	0.414789	0.411314	0.334598	MIC not significant	FALSE	FALSE	FALSE	FALSE	FALSE	FALSE	FALSE	FALSE
utr330Corf30CbestATG0	3682	0.085443	0.0010855	0.469	0.558	0.483427	0.570644	1562	0.115342	7.48528e-05	0.563	0.529	0.566958	0.528985	0.7326	MIC not significant	FALSE	FALSE	FALSE	FALSE	FALSE	FALSE	FALSE	FALSE
utr330Corf30CmeanATG0	3682	0.085443	0.00103583	0.459	0.523	0.446013	0.528522	1562	0.116851	2.19655e-05	0.424	0.389	0.456526	0.415163	0.853164	MIC not significant	FALSE	FALSE	FALSE	FALSE	FALSE	FALSE	FALSE	FALSE
utr330Corf30CbestATG1	3682	0.0804419	7.5398e-05	0.927	0.92	0.915242	0.905677	2312	0.105045	0.000922645	0.283	0.316	0.296162	0.336772	0.144268	MIC not significant	FALSE	FALSE	FALSE	FALSE	FALSE	FALSE	FALSE	FALSE
utr330Corf30CmeanATG1	3682	0.0817009	3.51537e-05	0.867	0.848	0.86626	0.850309	2312	0.10358	0.000554666	0.403	0.415	0.429514	0.43986	0.257647	MIC not significant	FALSE	FALSE	FALSE	FALSE	FALSE	FALSE	FALSE	FALSE
utr330Corf30CbestATG2	3682	0.0884069	0.000969942	0.099	0.139	0.0921524	0.128793	983	0.133855	0.00050513	0.508	0.468	0.528133	0.499601	0.481526	MIC not significant	FALSE	FALSE	FALSE	FALSE	FALSE	FALSE	FALSE	FALSE
utr330Corf30CmeanATG2	3682	0.0884069	0.000964616	0.101	0.135	0.106735	0.145363	983	0.131627	0.000550961	0.626	0.602	0.653064	0.629716	0.462281	MIC not significant	FALSE	FALSE	FALSE	FALSE	FALSE	FALSE	FALSE	FALSE
rutr530Corf30CbestATG	3648	0.134319	0.0708627	0	1	6.09374e-49	1	3646	0.133612	0.0704219	0	1	3.65293e-48	1	8.17731e-60	Monotone	TRUE	TRUE	FALSE	TRUE	TRUE	TRUE	FALSE	TRUE
rutr530Corf30CmeanATG	3648	0.128685	0.0680761	0	1	1.1803e-38	1	3646	0.128133	0.0676412	0	1	3.20422e-37	1	1.92653e-57	Monotone	TRUE	TRUE	FALSE	TRUE	TRUE	TRUE	FALSE	TRUE
rutr530Corf30CbestATG0	3648	0.113832	0.0364576	0	0.999772	6.31221e-17	0.999088	3647	0.113491	0.0363118	0	0.9999	1.67306e-16	0.999287	3.65016e-31	Monotone	TRUE	TRUE	FALSE	TRUE	TRUE	TRUE	FALSE	TRUE
rutr530Corf30CmeanATG0	3648	0.113081	0.0365797	0	0.999912	3.30966e-16	0.999665	3647	0.112198	0.0364337	0	1	3.19904e-15	0.999865	2.89363e-31	Monotone	TRUE	TRUE	FALSE	TRUE	TRUE	TRUE	FALSE	TRUE
rutr530Corf30CbestATG1	3648	0.113794	0.05535	0	1	1.1584e-16	1	3645	0.113857	0.0550085	0	1	1.27283e-16	1	9.79111e-47	Monotone	TRUE	TRUE	FALSE	TRUE	TRUE	TRUE	FALSE	TRUE
rutr530Corf30CmeanATG1	3648	0.118352	0.0545163	0	1	1.09793e-22	1	3645	0.118446	0.0541763	0	1	2.12069e-22	1	4.90358e-46	Monotone	TRUE	TRUE	FALSE	TRUE	TRUE	TRUE	FALSE	TRUE
rutr530Corf30CbestATG2	3648	0.114889	0.0549602	0	1	2.61542e-18	1	3647	0.114646	0.0547888	0	1	5.64606e-18	1	1.41593e-46	Monotone	TRUE	TRUE	FALSE	TRUE	TRUE	TRUE	FALSE	TRUE
rutr530Corf30CmeanATG2	3648	0.114889	0.0548944	0	1	1.94334e-18	1	3647	0.114646	0.054723	0	1	5.48517e-18	1	1.60825e-46	Monotone	TRUE	TRUE	FALSE	TRUE	TRUE	TRUE	FALSE	TRUE
rutr330Corf30CbestATG	3648	0.0988804	0.0222412	0.002	1	0.000229795	0.999792	3647	0.0989771	0.0222725	0.000990099	1	0.000247203	0.999771	1.30044e-19	Monotone	TRUE	TRUE	FALSE	TRUE	TRUE	TRUE	FALSE	TRUE
rutr330Corf30CmeanATG	3648	0.0994442	0.0222472	0.000732673	0.999921	0.000138846	0.99957	3647	0.0997901	0.0222785	0.000574257	0.999891	9.77712e-05	0.999384	1.2859e-19	Monotone	TRUE	TRUE	FALSE	TRUE	TRUE	TRUE	FALSE	TRUE
rutr330Corf30CbestATG0	3648	0.107206	0.0178392	0	0.256386	3.41474e-10	0.268324	3646	0.107316	0.0177163	1.04167e-05	0.239344	2.95649e-10	0.249718	7.0189e-16	non-significant monotone/non-monotone	TRUE	TRUE	FALSE	FALSE	TRUE	TRUE	FALSE	FALSE
rutr330Corf30CmeanATG0	3648	0.105559	0.0178877	0	0.449752	7.85594e-09	0.46756	3646	0.105669	0.0177647	0	0.42603	6.72118e-09	0.443266	6.40733e-16	non-significant monotone/non-monotone	TRUE	TRUE	FALSE	FALSE	TRUE	TRUE	FALSE	FALSE
rutr330Corf30CbestATG1	3648	0.101716	0.0107736	6.86275e-05	0.143627	5.78184e-06	0.144969	3647	0.101752	0.0106831	0.000125	0.137854	5.32183e-06	0.13643	3.93648e-10	non-significant monotone/non-monotone	TRUE	TRUE	FALSE	FALSE	TRUE	TRUE	FALSE	FALSE
rutr330Corf30CmeanATG1	3648	0.0980404	0.0106712	0.002	0.505	0.000879088	0.521459	3647	0.0981456	0.0105811	0.002	0.455	0.00026961	0.48407	4.77178e-10	non-significant monotone/non-monotone	TRUE	TRUE	FALSE	FALSE	TRUE	TRUE	FALSE	FALSE
rutr330Corf30CbestATG2	3648	0.108632	0.0264849	0	0.955683	1.29664e-11	0.946387	3647	0.108591	0.0263528	0	0.954168	1.20239e-11	0.944822	5.86582e-23	Monotone	TRUE	TRUE	FALSE	FALSE	TRUE	TRUE	FALSE	FALSE
rutr330Corf30CmeanATG2	3648	0.106987	0.0265204	0	0.990406	3.94876e-10	0.983756	3647	0.106946	0.0263882	0	0.98915	4.51187e-10	0.982795	5.4856e-23	Monotone	TRUE	TRUE	FALSE	TRUE	TRUE	TRUE	FALSE	TRUE
utr530Corf30CnumATGs	3682	0.103489	0.0428794	1.03093e-05	1	2.79713e-07	1	2911	0.0992404	0.0212989	0.0438614	0.999792	0.0380857	0.99917	2.51069e-15	Monotone	TRUE	FALSE	FALSE	FALSE	TRUE	FALSE	FALSE	FALSE
utr530Corf30CnumATGs0	3682	0.0904856	0.0039629	0.042	0.207	0.0348201	0.21099	1078	0.125954	4.85413e-05	0.439	0.389	0.446627	0.40637	0.819266	MIC not significant	FALSE	FALSE	FALSE	FALSE	FALSE	FALSE	FALSE	FALSE
utr530Corf30CnumATGs1	3682	0.0962103	0.0263309	0.003	1	0.000848868	0.999976	2271	0.0993646	0.0115189	0.518	0.995	0.53226	0.987838	2.94968e-07	MIC not significant	TRUE	FALSE	FALSE	FALSE	TRUE	FALSE	FALSE	FALSE
utr530Corf30CnumATGs2	3682	0.0967116	0.0154982	0.000326733	0.637267	6.14259e-05	0.646237	772	0.151601	0.00731534	0.069	0.143	0.0584211	0.158373	0.0174569	MIC not significant	TRUE	FALSE	FALSE	FALSE	TRUE	FALSE	FALSE	FALSE
utr330Corf30CnumATGs	3682	0.0840691	0.00231302	0.594	0.792	0.613753	0.798999	3144	0.0854211	0.00288983	0.846	0.951	0.84537	0.951788	0.00256792	MIC not significant	FALSE	FALSE	FALSE	FALSE	FALSE	FALSE	FALSE	FALSE
utr330Corf30CnumATGs0	3682	0.085443	0.00125778	0.458	0.56	0.465882	0.577602	1562	0.105282	0.000586037	0.807	0.806	0.807325	0.805922	0.339005	MIC not significant	FALSE	FALSE	FALSE	FALSE	FALSE	FALSE	FALSE	FALSE
utr330Corf30CnumATGs1	3682	0.0839211	0.000408535	0.596	0.601	0.602379	0.616343	2312	0.0986824	0.0041095	0.575	0.82	0.592704	0.827091	0.00204306	MIC not significant	FALSE	FALSE	FALSE	FALSE	FALSE	FALSE	FALSE	FALSE
utr330Corf30CnumATGs2	3682	0.0884069	0.00117602	0.105	0.152	0.103074	0.157486	983	0.122138	0.000264093	0.481	0.453	0.495239	0.462886	0.610824	MIC not significant	FALSE	FALSE	FALSE	FALSE	FALSE	FALSE	FALSE	FALSE
utr5uORFsBio	3682	0.137477	0.0675842	0	0.999825	1.42947e-53	0.999504	634	0.14052	1.45653e-05	0.753	0.719	0.75977	0.718235	0.923595	MIC not significant	TRUE	FALSE	FALSE	FALSE	TRUE	FALSE	FALSE	FALSE
u5maxLenuORFsBio	3682	0.137477	0.0651586	0	0.997602	7.15208e-54	0.995765	634	0.149229	0.0103261	0.496	0.769	0.512779	0.773587	0.0104599	MIC not significant	TRUE	FALSE	FALSE	FALSE	TRUE	FALSE	FALSE	FALSE
u5meanLenuORFsBio	3682	0.137477	0.0652593	0	0.997802	8.302e-54	0.996114	634	0.142355	0.00940388	0.71	0.906	0.727746	0.897023	0.0145789	MIC not significant	TRUE	FALSE	FALSE	FALSE	TRUE	FALSE	FALSE	FALSE
u5maxCostuORFsBio	3682	0.137477	0.0651412	0	0.997544	2.10402e-53	0.995572	634	0.176079	0.0102116	0.023	0.103	0.017527	0.0947833	0.0108985	non-significant monotone/non-monotone	TRUE	FALSE	FALSE	FALSE	TRUE	TRUE	FALSE	FALSE
u5meanCostuORFsBio	3682	0.137477	0.0652372	0	0.997893	1.15158e-53	0.995927	634	0.149381	0.00936797	0.626	0.868	0.640388	0.863736	0.0147695	MIC not significant	TRUE	FALSE	FALSE	FALSE	TRUE	FALSE	FALSE	FALSE
utr5uORFs30CBio	3682	0.131514	0.0589141	0	0.988738	1.99494e-45	0.984426	470	0.133564	0.0126443	0.957	0.997	0.954516	0.993372	0.0147263	MIC not significant	TRUE	FALSE	FALSE	FALSE	TRUE	FALSE	FALSE	FALSE
u5maxLenuORFs30CBio	3682	0.131514	0.0573025	0	0.962544	5.92821e-46	0.956902	470	0.158499	0.000336335	0.611	0.561	0.631264	0.582861	0.691689	MIC not significant	TRUE	FALSE	FALSE	FALSE	TRUE	FALSE	FALSE	FALSE
u5meanLenuORFs30CBio	3682	0.131514	0.0571165	0	0.957495	5.78344e-46	0.951692	470	0.162905	0.00133619	0.486	0.461	0.491556	0.467114	0.429164	MIC not significant	TRUE	FALSE	FALSE	FALSE	TRUE	FALSE	FALSE	FALSE
u5maxCostuORFs30CBio	3682	0.131514	0.0573147	0	0.962098	2.21211e-45	0.956572	470	0.179294	0.000217592	0.183	0.148	0.183455	0.149433	0.749757	MIC not significant	TRUE	FALSE	FALSE	FALSE	TRUE	FALSE	FALSE	FALSE
u5meanCostuORFs30CBio	3682	0.131514	0.0571417	0	0.958233	8.51635e-46	0.953106	470	0.180987	0.000969026	0.14	0.127	0.159623	0.143006	0.500801	MIC not significant	TRUE	FALSE	FALSE	FALSE	TRUE	FALSE	FALSE	FALSE
utr5uORFs0Bio	3682	0.0970224	0.0203788	0	0.59399	1.40268e-08	0.603763	256	0.16028	3.15356e-06	0.834	0.781	0.839682	0.795478	0.977443	MIC not significant	TRUE	FALSE	FALSE	FALSE	TRUE	FALSE	FALSE	FALSE
utr5uORFs1Bio	3682	0.100385	0.0294227	0	0.99098	4.0255e-10	0.986415	324	0.177325	0.0103267	0.446	0.598	0.479645	0.630976	0.0677258	MIC not significant	TRUE	FALSE	FALSE	FALSE	TRUE	FALSE	FALSE	FALSE
utr5uORFs2Bio	3682	0.101994	0.0337415	0	0.999233	1.07676e-11	0.998275	307	0.189702	0.00297728	0.188	0.176	0.197632	0.190938	0.340663	MIC not significant	TRUE	FALSE	FALSE	FALSE	TRUE	FALSE	FALSE	FALSE
u5maxLenuORFs0Bio	3682	0.0970224	0.0198887	0	0.532337	1.3029e-08	0.54544	256	0.216027	0.0263242	0.06	0.28	0.0538383	0.304151	0.00930865	MIC not significant	TRUE	FALSE	FALSE	FALSE	TRUE	FALSE	FALSE	FALSE
u5maxLenuORFs1Bio	3682	0.100385	0.0292651	0	0.989243	3.65309e-10	0.984749	324	0.206143	0.00741599	0.101	0.137	0.0963915	0.139028	0.121869	MIC not significant	TRUE	FALSE	FALSE	FALSE	TRUE	FALSE	FALSE	FALSE
u5maxLenuORFs2Bio	3682	0.101994	0.0334242	0	0.998864	1.04506e-11	0.997706	307	0.18255	0.00814242	0.396	0.494	0.424711	0.525152	0.114607	MIC not significant	TRUE	FALSE	FALSE	FALSE	TRUE	FALSE	FALSE	FALSE
u5meanLenuORFs0Bio	3682	0.0970224	0.0199159	0	0.538188	1.43427e-08	0.550493	256	0.214088	0.0234995	0.09	0.285	0.0764364	0.308881	0.0140786	MIC not significant	TRUE	FALSE	FALSE	FALSE	TRUE	FALSE	FALSE	FALSE
u5meanLenuORFs1Bio	3682	0.100385	0.0293657	0	0.989883	4.62789e-10	0.985112	324	0.205094	0.00491479	0.106	0.119	0.105584	0.122842	0.208185	MIC not significant	TRUE	FALSE	FALSE	FALSE	TRUE	FALSE	FALSE	FALSE
u5meanLenuORFs2Bio	3682	0.101994	0.0335638	0	0.999068	1.02227e-11	0.997986	307	0.165848	0.00426017	0.722	0.746	0.732496	0.752767	0.254214	MIC not significant	TRUE	FALSE	FALSE	FALSE	TRUE	FALSE	FALSE	FALSE
u5maxCostuORFs0Bio	3682	0.0970224	0.0198894	0	0.534911	1.42616e-08	0.548032	256	0.209269	0.02554	0.159	0.528	0.166212	0.562665	0.0104382	MIC not significant	TRUE	FALSE	FALSE	FALSE	TRUE	FALSE	FALSE	FALSE
u5maxCostuORFs1Bio	3682	0.100385	0.0293177	0	0.990039	3.74724e-10	0.985195	324	0.198235	0.0057607	0.245	0.286	0.26148	0.312929	0.172922	MIC not significant	TRUE	FALSE	FALSE	FALSE	TRUE	FALSE	FALSE	FALSE
u5maxCostuORFs2Bio	3682	0.101994	0.0333884	0	0.998932	1.11405e-11	0.997548	307	0.215778	0.00988749	0.051	0.095	0.0415346	0.0891628	0.0819533	MIC not significant	TRUE	FALSE	FALSE	FALSE	TRUE	FALSE	FALSE	FALSE
u5meanCostuORFs0Bio	3682	0.0970224	0.0198984	0	0.535981	1.53047e-08	0.548436	256	0.18795	0.0246221	0.505	0.893	0.531349	0.887339	0.0119393	MIC not significant	TRUE	FALSE	FALSE	FALSE	TRUE	FALSE	FALSE	FALSE
u5meanCostuORFs1Bio	3682	0.100385	0.0294255	0	0.990456	3.93739e-10	0.986311	324	0.210403	0.00334612	0.103	0.104	0.0901617	0.0924327	0.299239	MIC not significant	TRUE	FALSE	FALSE	FALSE	TRUE	FALSE	FALSE	FALSE
u5meanCostuORFs2Bio	3682	0.101994	0.0334958	0	0.999204	1.06805e-11	0.997758	307	0.220893	0.00665784	0.035	0.048	0.0180975	0.0311678	0.153806	Non-monotone	TRUE	FALSE	FALSE	FALSE	TRUE	TRUE	FALSE	FALSE
utr5uORFs030CBio	3682	0.0946967	0.0173854	0	0.272554	5.50642e-10	0.280608	136	0.197818	0.0131147	0.544	0.625	0.572971	0.647788	0.184324	MIC not significant	TRUE	FALSE	FALSE	FALSE	TRUE	FALSE	FALSE	FALSE
utr5uORFs130CBio	3682	0.0962786	0.0284844	0	0.998097	7.35369e-09	0.995875	214	0.210072	0.00412396	0.099	0.085	0.0959504	0.085509	0.349844	MIC not significant	TRUE	FALSE	FALSE	FALSE	TRUE	FALSE	FALSE	FALSE
utr5uORFs230CBio	3682	0.0962692	0.023484	0	0.867777	4.26985e-09	0.866324	203	0.197564	0.00230484	0.28	0.239	0.298887	0.255904	0.496385	MIC not significant	TRUE	FALSE	FALSE	FALSE	TRUE	FALSE	FALSE	FALSE
u5maxLenuORFs030CBio	3682	0.0946967	0.0171492	0	0.247663	5.1078e-10	0.256069	136	0.243566	0.0161235	0.2	0.256	0.201305	0.287569	0.140721	MIC not significant	TRUE	FALSE	FALSE	FALSE	TRUE	FALSE	FALSE	FALSE
u5maxLenuORFs130CBio	3682	0.0962786	0.0284541	0	0.997874	7.02573e-09	0.995657	214	0.256504	0.00415787	0.005	0.002	0.0026732	0.00261734	0.347866	Non-monotone	TRUE	TRUE	FALSE	FALSE	TRUE	TRUE	FALSE	FALSE
u5maxLenuORFs230CBio	3682	0.0962692	0.0234085	0	0.863317	3.8766e-09	0.862625	203	0.201808	1.95365e-05	0.481	0.399	0.521124	0.435563	0.950096	MIC not significant	TRUE	FALSE	FALSE	FALSE	TRUE	FALSE	FALSE	FALSE
u5meanLenuORFs030CBio	3682	0.0946967	0.0171341	0	0.246812	5.67382e-10	0.253742	136	0.244574	0.0197848	0.18	0.279	0.174078	0.303629	0.102398	MIC not significant	TRUE	FALSE	FALSE	FALSE	TRUE	FALSE	FALSE	FALSE
u5meanLenuORFs130CBio	3682	0.0962786	0.0284318	0	0.998146	7.57551e-09	0.995561	214	0.277522	0.00311404	0.002	0.001	0.000346287	0.000239824	0.416684	Non-monotone	TRUE	TRUE	FALSE	FALSE	TRUE	TRUE	TRUE	FALSE
u5meanLenuORFs230CBio	3682	0.0962692	0.0233977	0	0.860408	4.03543e-09	0.859938	203	0.210139	2.86078e-07	0.423	0.347	0.441276	0.365996	0.993957	MIC not significant	TRUE	FALSE	FALSE	FALSE	TRUE	FALSE	FALSE	FALSE
u5maxCostuORFs030CBio	3682	0.0946967	0.0171567	0	0.248119	6.17966e-10	0.256782	136	0.253496	0.01242	0.196	0.241	0.212177	0.270003	0.196463	MIC not significant	TRUE	FALSE	FALSE	FALSE	TRUE	FALSE	FALSE	FALSE
u5maxCostuORFs130CBio	3682	0.0962786	0.0285013	0	0.998097	8.38745e-09	0.99586	214	0.243897	0.00762153	0.042	0.051	0.0343636	0.0450914	0.203352	non-significant monotone/non-monotone	TRUE	FALSE	FALSE	FALSE	TRUE	FALSE	FALSE	FALSE
u5maxCostuORFs230CBio	3682	0.0962692	0.0233716	0	0.861243	4.66085e-09	0.860388	203	0.217051	0.000167635	0.45	0.362	0.473684	0.397259	0.854531	MIC not significant	TRUE	FALSE	FALSE	FALSE	TRUE	FALSE	FALSE	FALSE
u5meanCostuORFs030CBio	3682	0.0946967	0.017145	0	0.249475	5.93387e-10	0.255644	136	0.253496	0.0147953	0.214	0.277	0.227409	0.30115	0.158346	MIC not significant	TRUE	FALSE	FALSE	FALSE	TRUE	FALSE	FALSE	FALSE
u5meanCostuORFs130CBio	3682	0.0962786	0.0284779	0	0.997902	7.52285e-09	0.995721	214	0.238644	0.00606017	0.062	0.066	0.0485034	0.0565634	0.256855	MIC not significant	TRUE	FALSE	FALSE	FALSE	TRUE	FALSE	FALSE	FALSE
u5meanCostuORFs230CBio	3682	0.0962692	0.0233614	1.02041e-05	0.859622	3.78523e-09	0.858876	203	0.204798	0.000308686	0.677	0.588	0.687546	0.609812	0.803516	MIC not significant	TRUE	FALSE	FALSE	FALSE	TRUE	FALSE	FALSE	FALSE
orfuORFsBio	3682	0.143329	0.0936727	0	1	1.46753e-57	1	3436	0.155701	0.129928	0	1	9.78755e-70	1	6.19734e-106	Monotone	TRUE	TRUE	FALSE	TRUE	TRUE	TRUE	FALSE	TRUE
orfmaxLenuORFsBio	3682	0.134288	0.0733258	0	1	1.52417e-41	1	3436	0.148713	0.102315	0	1	1.90486e-56	1	1.38658e-82	Monotone	TRUE	TRUE	FALSE	TRUE	TRUE	TRUE	FALSE	TRUE
orfmeanLenuORFsBio	3682	0.126994	0.0388722	0	0.235406	2.42333e-37	0.247234	3436	0.130517	0.0553603	0	1	3.34305e-35	0.999987	1.96052e-44	Monotone	TRUE	TRUE	FALSE	TRUE	TRUE	TRUE	FALSE	TRUE
orfmaxCostuORFsBio	3682	0.148774	0.079357	0	1	1.11103e-87	1	3436	0.157742	0.110476	0	1	4.19409e-94	1	2.0662e-89	Monotone	TRUE	TRUE	FALSE	TRUE	TRUE	TRUE	FALSE	TRUE
orfmeanCostuORFsBio	3682	0.125482	0.0429463	0	0.908188	1.61702e-35	0.900886	3436	0.129891	0.0609272	0	1	1.54403e-33	1	7.31675e-49	Monotone	TRUE	TRUE	FALSE	TRUE	TRUE	TRUE	FALSE	TRUE
orfuORFs30CBio	3682	0.0939069	0.0180979	0.014	0.996	0.00898897	0.992637	2812	0.0939026	0.00584423	0.435	0.866	0.429462	0.865673	4.94907e-05	MIC not significant	TRUE	FALSE	FALSE	FALSE	TRUE	FALSE	FALSE	FALSE
orfmaxLenuORFs30CBio	3682	0.0930654	0.0108656	0.019	0.775	0.0181399	0.780474	2812	0.098903	0.000789881	0.106	0.126	0.0993584	0.117945	0.136229	MIC not significant	FALSE	FALSE	FALSE	FALSE	FALSE	FALSE	FALSE	FALSE
orfmeanLenuORFs30CBio	3682	0.0827965	0.00779221	0.743	0.999	0.746405	0.9972	2812	0.0864984	7.16957e-07	0.933	0.924	0.934136	0.92325	0.964202	MIC not significant	FALSE	FALSE	FALSE	FALSE	FALSE	FALSE	FALSE	FALSE
orfmaxCostuORFs30CBio	3682	0.113257	0.0115152	0	1.9802e-05	1.7842e-15	1.3244e-06	2812	0.130585	0.00111001	0	0	1.36091e-20	7.58349e-20	0.0773224	Non-monotone	TRUE	TRUE	TRUE	FALSE	TRUE	TRUE	TRUE	FALSE
orfmeanCostuORFs30CBio	3682	0.0931067	0.00829275	0.02	0.512	0.0121692	0.539953	2812	0.0959504	3.09096e-05	0.329	0.292	0.33468	0.305559	0.768231	MIC not significant	FALSE	FALSE	FALSE	FALSE	TRUE	FALSE	FALSE	FALSE
orfuORFs200CBio	3682	0.121872	0.0571853	0	1	6.16162e-24	1	3647	0.12163	0.052879	0	1	1.90335e-22	0.999998	5.70489e-45	Monotone	TRUE	TRUE	FALSE	TRUE	TRUE	TRUE	FALSE	TRUE
orfmaxLenuORFs200CBio	3682	0.14166	0.085969	0	1	3.22944e-54	1	3647	0.139515	0.0816766	0	1	2.33283e-48	1	1.67194e-69	Monotone	TRUE	TRUE	FALSE	TRUE	TRUE	TRUE	FALSE	TRUE
orfmeanLenuORFs200CBio	3682	0.127328	0.0488356	0	0.994337	1.9905e-37	0.988773	3647	0.12706	0.0450163	0	0.93083	1.29771e-35	0.920607	2.16034e-38	non-significant monotone/non-monotone	TRUE	TRUE	FALSE	FALSE	TRUE	TRUE	FALSE	FALSE
orfmaxCostuORFs200CBio	3682	0.140263	0.0931349	0	1	3.21756e-65	1	3647	0.138535	0.0888186	0	1	2.00012e-58	1	1.0604e-75	Monotone	TRUE	TRUE	FALSE	TRUE	TRUE	TRUE	FALSE	TRUE
orfmeanCostuORFs200CBio	3682	0.126778	0.0530266	0	1	7.58826e-37	0.999987	3647	0.125605	0.0491311	0	1	2.42126e-33	0.999824	7.90618e-42	Monotone	TRUE	TRUE	FALSE	TRUE	TRUE	TRUE	FALSE	TRUE
orfuORFs0Bio	3682	0.141854	0.0971665	0	1	1.90972e-54	1	3574	0.136256	0.0807779	0	1	3.11402e-41	1	2.18442e-67	Monotone	TRUE	TRUE	FALSE	TRUE	TRUE	TRUE	FALSE	TRUE
orfuORFs1Bio	3682	0.136045	0.0936841	0	1	1.56664e-44	1	3483	0.13892	0.107641	0	1	1.2053e-42	1	3.37378e-88	Monotone	TRUE	TRUE	FALSE	TRUE	TRUE	TRUE	FALSE	TRUE
orfuORFs2Bio	3682	0.132956	0.100462	0	1	2.0823e-39	1	3147	0.137211	0.0777887	0	1	1.05614e-31	1	2.52288e-57	Monotone	TRUE	TRUE	FALSE	TRUE	TRUE	TRUE	FALSE	TRUE
orfmaxLenuORFs0Bio	3682	0.151173	0.108168	0	1	1.1209e-72	1	3574	0.14348	0.0915889	0	1	4.73394e-53	1	1.36689e-76	Monotone	TRUE	TRUE	FALSE	TRUE	TRUE	TRUE	FALSE	TRUE
orfmaxLenuORFs1Bio	3682	0.0821958	0.00149153	0.805	0.89	0.813684	0.892427	3483	0.0895914	0.000798769	0.272	0.322	0.279712	0.324522	0.095375	MIC not significant	FALSE	FALSE	FALSE	FALSE	FALSE	FALSE	FALSE	FALSE
orfmaxLenuORFs2Bio	3682	0.111983	0.0529516	0	1	1.31416e-13	1	3147	0.102675	0.0253368	0.00164	0.9995	0.000833419	0.998666	2.6295e-19	Monotone	TRUE	TRUE	FALSE	TRUE	TRUE	TRUE	FALSE	TRUE
orfmeanLenuORFs0Bio	3682	0.150244	0.0956489	0	1	5.62272e-85	1	3574	0.134417	0.0793251	0	1	1.315e-45	1	3.70022e-66	Monotone	TRUE	TRUE	FALSE	TRUE	TRUE	TRUE	FALSE	TRUE
orfmeanLenuORFs1Bio	3682	0.101935	0.0135934	1.9802e-05	0.177624	1.93295e-06	0.178404	3483	0.11008	0.0212533	0	0.29095	4.31738e-10	0.301038	5.29025e-18	non-significant monotone/non-monotone	TRUE	TRUE	FALSE	FALSE	TRUE	TRUE	FALSE	FALSE
orfmeanLenuORFs2Bio	3682	0.0932839	0.0231739	0.021	1	0.0150818	0.999968	3147	0.0852285	0.0026642	0.888	0.968	0.884777	0.962267	0.00377547	MIC not significant	FALSE	FALSE	FALSE	FALSE	FALSE	FALSE	FALSE	FALSE
orfmaxCostuORFs0Bio	3682	0.156239	0.116823	0	1	6.35479e-109	1	3574	0.147981	0.100132	0	1	1.54762e-78	1	6.13377e-84	Monotone	TRUE	TRUE	FALSE	TRUE	TRUE	TRUE	FALSE	TRUE
orfmaxCostuORFs1Bio	3682	0.0909777	0.00265139	0.057	0.196	0.0547898	0.180933	3483	0.0940119	0.00182274	0.034	0.081	0.0298598	0.0728166	0.0117391	MIC not significant	FALSE	FALSE	FALSE	FALSE	FALSE	FALSE	FALSE	FALSE
orfmaxCostuORFs2Bio	3682	0.117853	0.0524996	0	1	8.83046e-20	1	3147	0.100985	0.0249172	0.00507921	0.99999	0.00268992	0.999726	5.21582e-19	Monotone	TRUE	TRUE	FALSE	TRUE	TRUE	TRUE	FALSE	TRUE
orfmeanCostuORFs0Bio	3682	0.156988	0.105115	0	1	1.60525e-111	1	3574	0.14087	0.0885773	0	1	3.72877e-61	1	5.1305e-74	Monotone	TRUE	TRUE	FALSE	TRUE	TRUE	TRUE	FALSE	TRUE
orfmeanCostuORFs1Bio	3682	0.106969	0.0106204	0	0.00254455	4.63093e-11	0.00076881	3483	0.111322	0.017059	0	0.05118	3.52537e-12	0.0440793	1.00505e-14	non-significant monotone/non-monotone	TRUE	TRUE	FALSE	FALSE	TRUE	TRUE	FALSE	FALSE
orfmeanCostuORFs2Bio	3682	0.103968	0.0229506	0	0.900663	3.38962e-08	0.894631	3147	0.0898806	0.00255909	0.551	0.807	0.597563	0.804044	0.00453189	MIC not significant	TRUE	FALSE	FALSE	FALSE	TRUE	FALSE	FALSE	FALSE
orfuORFs030CBio	3682	0.0882138	0.000397345	0.113	0.122	0.108838	0.115946	979	0.120359	0.00148165	0.762	0.777	0.765809	0.780315	0.228865	MIC not significant	FALSE	FALSE	FALSE	FALSE	FALSE	FALSE	FALSE	FALSE
orfuORFs130CBio	3682	0.0908541	0.0155573	0.062	0.999	0.0564962	0.995759	2194	0.0995178	0.00670252	0.568	0.933	0.587986	0.92394	0.00012353	MIC not significant	FALSE	FALSE	FALSE	FALSE	FALSE	FALSE	FALSE	FALSE
orfuORFs230CBio	3682	0.0858112	0.00358397	0.136	0.422	0.13892	0.435276	619	0.136861	0.00499374	0.534	0.638	0.557889	0.667349	0.0789515	MIC not significant	FALSE	FALSE	FALSE	FALSE	FALSE	FALSE	FALSE	FALSE
orfmaxLenuORFs030CBio	3682	0.0882138	0.00319576	0.128	0.347	0.124697	0.361523	979	0.214685	0.147996	0	1	2.86234e-23	1	6.91737e-36	MIC not significant	FALSE	TRUE	FALSE	FALSE	FALSE	TRUE	FALSE	FALSE
orfmaxLenuORFs130CBio	3682	0.0870862	0.00704317	0.28	0.911	0.296147	0.910975	2194	0.0976436	0.00087523	0.75	0.784	0.747621	0.772397	0.165977	MIC not significant	FALSE	FALSE	FALSE	FALSE	FALSE	FALSE	FALSE	FALSE
orfmaxLenuORFs230CBio	3682	0.0858112	0.00334018	0.139	0.385	0.140901	0.409909	619	0.154393	8.02395e-06	0.244	0.205	0.243538	0.200484	0.943928	MIC not significant	FALSE	FALSE	FALSE	FALSE	FALSE	FALSE	FALSE	FALSE
orfmeanLenuORFs030CBio	3682	0.0882138	0.00320137	0.113	0.305	0.108455	0.337488	979	0.213291	0.148427	0	1	3.73862e-23	1	5.3942e-36	MIC not significant	FALSE	TRUE	FALSE	FALSE	FALSE	TRUE	FALSE	FALSE
orfmeanLenuORFs130CBio	3682	0.0874681	0.00577928	0.26	0.841	0.275403	0.831445	2194	0.0999041	0.00259164	0.595	0.742	0.596288	0.746319	0.0170915	MIC not significant	FALSE	FALSE	FALSE	FALSE	FALSE	FALSE	FALSE	FALSE
orfmeanLenuORFs230CBio	3682	0.0858112	0.00331874	0.136	0.386	0.131421	0.391441	619	0.158035	5.32896e-05	0.175	0.155	0.181387	0.146532	0.856166	MIC not significant	FALSE	FALSE	FALSE	FALSE	FALSE	FALSE	FALSE	FALSE
orfmaxCostuORFs030CBio	3682	0.0919659	0.00335653	0.017	0.092	0.0142989	0.0897088	979	0.248434	0.160328	0	1	1.12643e-47	1	5.36643e-39	Monotone	FALSE	TRUE	FALSE	FALSE	TRUE	TRUE	FALSE	TRUE
orfmaxCostuORFs130CBio	3682	0.0907044	0.00748681	0.077	0.7	0.0707376	0.695308	2194	0.0970167	0.000502021	0.804	0.797	0.805361	0.807365	0.294166	MIC not significant	FALSE	FALSE	FALSE	FALSE	FALSE	FALSE	FALSE	FALSE
orfmaxCostuORFs230CBio	3682	0.0858112	0.00331314	0.152	0.4	0.15084	0.419314	619	0.138851	7.48862e-05	0.844	0.791	0.843176	0.806977	0.829869	MIC not significant	FALSE	FALSE	FALSE	FALSE	FALSE	FALSE	FALSE	FALSE
orfmeanCostuORFs030CBio	3682	0.0959825	0.00336101	0.002	0.011	0.00038891	0.00594209	979	0.256433	0.160682	0	1	4.46307e-54	1	4.36127e-39	Monotone	TRUE	TRUE	FALSE	TRUE	TRUE	TRUE	FALSE	TRUE
orfmeanCostuORFs130CBio	3682	0.0906573	0.00619176	0.087	0.537	0.075001	0.558005	2194	0.0979949	0.0018939	0.765	0.847	0.767385	0.846051	0.0415258	MIC not significant	FALSE	FALSE	FALSE	FALSE	FALSE	FALSE	FALSE	FALSE
orfmeanCostuORFs230CBio	3682	0.0858112	0.0032913	0.137	0.368	0.132986	0.389708	619	0.14171	0.000176537	0.784	0.735	0.783118	0.74229	0.741463	MIC not significant	FALSE	FALSE	FALSE	FALSE	FALSE	FALSE	FALSE	FALSE
orfuORFs0200CBio	3682	0.0982086	0.00830178	0.003	0.08	0.000280253	0.0890601	3415	0.0911654	0.00539369	0.132	0.615	0.144012	0.608846	1.73891e-05	MIC not significant	TRUE	FALSE	FALSE	FALSE	TRUE	FALSE	FALSE	FALSE
orfuORFs1200CBio	3682	0.115276	0.0460169	0	1	9.19262e-17	0.999992	3622	0.111783	0.0374093	0	0.999901	3.97046e-12	0.999299	7.28475e-32	Monotone	TRUE	TRUE	FALSE	TRUE	TRUE	TRUE	FALSE	TRUE
orfuORFs2200CBio	3682	0.094837	0.0169306	0.004	0.975	0.0031188	0.964636	2455	0.102308	0.0108108	0.182	0.892	0.175358	0.894734	2.42866e-07	MIC not significant	TRUE	FALSE	FALSE	FALSE	TRUE	FALSE	FALSE	FALSE
orfmaxLenuORFs0200CBio	3682	0.14166	0.0851258	0	1	4.59898e-54	1	3415	0.144874	0.0953542	0	1	5.87743e-51	1	2.37213e-76	Monotone	TRUE	TRUE	FALSE	TRUE	TRUE	TRUE	FALSE	TRUE
orfmaxLenuORFs1200CBio	3682	0.0909775	0.000222004	0.071	0.066	0.0620581	0.0601738	3622	0.0899949	0.00191183	0.168	0.285	0.175025	0.306029	0.00849275	MIC not significant	FALSE	FALSE	FALSE	FALSE	FALSE	FALSE	FALSE	FALSE
orfmaxLenuORFs2200CBio	3682	0.0896682	0.0100834	0.121	0.93	0.125348	0.928919	2455	0.0909661	0.00139526	0.935	0.953	0.93185	0.953855	0.064245	MIC not significant	FALSE	FALSE	FALSE	FALSE	FALSE	FALSE	FALSE	FALSE
orfmeanLenuORFs0200CBio	3682	0.143549	0.0839637	0	1	2.50992e-63	1	3415	0.147744	0.0939351	0	1	8.78437e-63	1	3.46803e-75	Monotone	TRUE	TRUE	FALSE	TRUE	TRUE	TRUE	FALSE	TRUE
orfmeanLenuORFs1200CBio	3682	0.093101	0.00755093	0.018	0.447	0.0147817	0.450945	3622	0.0989834	0.0139769	0.000841584	0.616634	0.000353103	0.626063	9.49293e-13	non-significant monotone/non-monotone	FALSE	TRUE	FALSE	FALSE	TRUE	TRUE	FALSE	FALSE
orfmeanLenuORFs2200CBio	3682	0.0928744	0.00745343	0.028	0.462	0.0222673	0.474356	2455	0.0916997	3.79281e-05	0.904	0.888	0.902709	0.888752	0.760372	MIC not significant	FALSE	FALSE	FALSE	FALSE	FALSE	FALSE	FALSE	FALSE
orfmaxCostuORFs0200CBio	3682	0.140937	0.0920353	0	1	6.83885e-67	1	3415	0.150799	0.103921	0	1	2.15985e-78	1	2.01839e-83	Monotone	TRUE	TRUE	FALSE	TRUE	TRUE	TRUE	FALSE	TRUE
orfmaxCostuORFs1200CBio	3682	0.089313	2.24073e-05	0.118	0.11	0.119626	0.105783	3622	0.0921936	0.00110172	0.077	0.103	0.0654882	0.0997393	0.0457746	MIC not significant	FALSE	FALSE	FALSE	FALSE	FALSE	FALSE	FALSE	FALSE
orfmaxCostuORFs2200CBio	3682	0.0902378	0.010259	0.088	0.909	0.0825646	0.908486	2455	0.0888511	0.00154415	0.991	0.995	0.975892	0.986907	0.0515608	MIC not significant	FALSE	FALSE	FALSE	FALSE	FALSE	FALSE	FALSE	FALSE
orfmeanCostuORFs0200CBio	3682	0.150635	0.0903945	0	1	2.04574e-92	1	3415	0.15531	0.1019	0	1	1.42898e-89	1	9.51369e-82	Monotone	TRUE	TRUE	FALSE	TRUE	TRUE	TRUE	FALSE	TRUE
orfmeanCostuORFs1200CBio	3682	0.0927368	0.00536039	0.031	0.383	0.0307275	0.395919	3622	0.0967344	0.0108265	0.006	0.717	0.00344934	0.722128	3.45286e-10	non-significant monotone/non-monotone	FALSE	TRUE	FALSE	FALSE	FALSE	TRUE	FALSE	FALSE
orfmeanCostuORFs2200CBio	3682	0.0889678	0.0074232	0.137	0.813	0.133642	0.811216	2455	0.0881438	3.32562e-05	0.997	0.997	0.991222	0.989119	0.775191	MIC not significant	FALSE	FALSE	FALSE	FALSE	FALSE	FALSE	FALSE	FALSE
orfgcWin1	3682	0.0915178	0.00065824	0.04	0.051	0.038009	0.047178	3682	0.0915178	0.00065824	0.044	0.05	0.0381987	0.0477546	0.119582	non-significant monotone/non-monotone	FALSE	FALSE	FALSE	FALSE	FALSE	FALSE	FALSE	FALSE
orfgcWin2	3682	0.0867686	0.000599376	0.32	0.345	0.333002	0.3667	3682	0.0867686	0.000599376	0.322	0.351	0.330068	0.363603	0.137469	MIC not significant	FALSE	FALSE	FALSE	FALSE	FALSE	FALSE	FALSE	FALSE
orfgcWin3	3682	0.0912912	0.000942694	0.052	0.071	0.0481522	0.0688359	3682	0.0912912	0.000942694	0.054	0.068	0.045258	0.0656888	0.0624807	MIC not significant	FALSE	FALSE	FALSE	FALSE	FALSE	FALSE	FALSE	FALSE
orfgcWin4	3682	0.0847979	0.00116066	0.51	0.609	0.531514	0.628248	3682	0.0847979	0.00116066	0.563	0.648	0.560731	0.654406	0.0387199	MIC not significant	FALSE	FALSE	FALSE	FALSE	FALSE	FALSE	FALSE	FALSE
orfgcWin5	3682	0.0880598	0.00198778	0.201	0.351	0.203377	0.360432	3682	0.0880598	0.00198778	0.218	0.382	0.221276	0.386198	0.0068142	MIC not significant	FALSE	FALSE	FALSE	FALSE	FALSE	FALSE	FALSE	FALSE
orfgcWin6	3682	0.0862617	0.00138303	0.379	0.521	0.411797	0.534619	3682	0.0862617	0.00138303	0.398	0.512	0.399676	0.521279	0.0240311	MIC not significant	FALSE	FALSE	FALSE	FALSE	FALSE	FALSE	FALSE	FALSE
orfgcWin7	3682	0.0856189	0.00204304	0.459	0.647	0.463606	0.65002	3682	0.0856189	0.00204304	0.473	0.664	0.482651	0.66552	0.00608466	MIC not significant	FALSE	FALSE	FALSE	FALSE	FALSE	FALSE	FALSE	FALSE
orfgcWin8	3682	0.0846112	0.00194331	0.57	0.757	0.578362	0.751486	3682	0.0846112	0.00194331	0.546	0.718	0.561758	0.732456	0.0074656	MIC not significant	FALSE	FALSE	FALSE	FALSE	FALSE	FALSE	FALSE	FALSE
orfgcWin9	3682	0.0876922	0.00249919	0.266	0.478	0.260679	0.481956	3682	0.0876922	0.00249919	0.267	0.48	0.265971	0.484027	0.00241054	MIC not significant	FALSE	FALSE	FALSE	FALSE	FALSE	FALSE	FALSE	FALSE
orfgcWin10	3682	0.0898954	0.00257511	0.114	0.249	0.101747	0.261321	3682	0.0898954	0.00257511	0.113	0.283	0.113195	0.276368	0.00206894	MIC not significant	FALSE	FALSE	FALSE	FALSE	FALSE	FALSE	FALSE	FALSE
orfgcWin11	3682	0.08617	0.00214932	0.368	0.587	0.399267	0.600455	3682	0.08617	0.00214932	0.374	0.58	0.391976	0.605696	0.00489741	MIC not significant	FALSE	FALSE	FALSE	FALSE	FALSE	FALSE	FALSE	FALSE
orfgcWin12	3682	0.0887154	0.0028116	0.171	0.398	0.173235	0.414664	3682	0.0887154	0.0028116	0.193	0.392	0.1825	0.410552	0.00128786	MIC not significant	FALSE	FALSE	FALSE	FALSE	FALSE	FALSE	FALSE	FALSE
orfgcWin13	3682	0.0885332	0.00374148	0.174	0.498	0.167013	0.510297	3682	0.0885332	0.00374148	0.177	0.494	0.173076	0.512982	0.000204141	MIC not significant	FALSE	FALSE	FALSE	FALSE	FALSE	FALSE	FALSE	FALSE
orfgcWin14	3682	0.0873463	0.00338983	0.279	0.599	0.292451	0.620072	3682	0.0873463	0.00338983	0.267	0.592	0.277049	0.603322	0.000408249	MIC not significant	FALSE	FALSE	FALSE	FALSE	FALSE	FALSE	FALSE	FALSE
orfgcWin15	3682	0.0857242	0.0043046	0.415	0.832	0.429523	0.828081	3682	0.0857242	0.0043046	0.448	0.837	0.447578	0.83508	6.77396e-05	MIC not significant	FALSE	FALSE	FALSE	FALSE	FALSE	FALSE	FALSE	FALSE
orfgcWin16	3682	0.0877833	0.00563785	0.243	0.767	0.243146	0.775658	3682	0.0877833	0.00563785	0.253	0.774	0.248416	0.775111	5.08984e-06	MIC not significant	FALSE	FALSE	FALSE	FALSE	FALSE	FALSE	FALSE	FALSE
orfgcWin17	3682	0.0893063	0.00600181	0.141	0.683	0.135526	0.68538	3682	0.0893063	0.00600181	0.139	0.661	0.144023	0.677623	2.5213e-06	MIC not significant	FALSE	FALSE	FALSE	FALSE	FALSE	FALSE	FALSE	FALSE
orfgcWin18	3682	0.0937794	0.00612651	0.015	0.244	0.0104039	0.239298	3682	0.0937794	0.00612651	0.012	0.237	0.0114281	0.237261	1.98261e-06	non-significant monotone/non-monotone	FALSE	TRUE	FALSE	FALSE	TRUE	TRUE	FALSE	FALSE
orfgcWin19	3682	0.0895381	0.00757546	0.121	0.795	0.121957	0.797674	3682	0.0895381	0.00757546	0.135	0.8	0.138792	0.808279	1.22574e-07	MIC not significant	FALSE	FALSE	FALSE	FALSE	FALSE	FALSE	FALSE	FALSE
orfgcWin20	3682	0.09019	0.00745125	0.092	0.729	0.0903521	0.755076	3682	0.09019	0.00745125	0.076	0.731	0.0713722	0.724989	1.55517e-07	MIC not significant	FALSE	FALSE	FALSE	FALSE	FALSE	FALSE	FALSE	FALSE
orfgcWin21	3682	0.092606	0.00904025	0.024	0.653	0.0256872	0.654812	3682	0.092606	0.00904025	0.029	0.648	0.0250811	0.650121	7.44522e-09	non-significant monotone/non-monotone	FALSE	FALSE	FALSE	FALSE	FALSE	FALSE	FALSE	FALSE
orfgcWin22	3682	0.0929679	0.0092024	0.027	0.6	0.017668	0.624976	3682	0.0929679	0.0092024	0.024	0.622	0.0172813	0.620022	5.46328e-09	non-significant monotone/non-monotone	FALSE	FALSE	FALSE	FALSE	FALSE	TRUE	FALSE	FALSE
orfgcWin23	3682	0.097724	0.011276	0.00072449	0.332459	0.000305336	0.339968	3682	0.097724	0.011276	0.001	0.323	0.000356235	0.346419	1.05014e-10	non-significant monotone/non-monotone	TRUE	TRUE	FALSE	FALSE	TRUE	TRUE	FALSE	FALSE
orfgcWin24	3682	0.0952755	0.0123221	0.003	0.704	0.00256357	0.70403	3682	0.0952755	0.0123221	0.006	0.693	0.00208749	0.704324	1.43498e-11	non-significant monotone/non-monotone	TRUE	TRUE	FALSE	FALSE	TRUE	TRUE	FALSE	FALSE
orfgcWin25	3682	0.0933444	0.0126912	0.019	0.873	0.0121325	0.865237	3682	0.0933444	0.0126912	0.015	0.877	0.0127185	0.878889	7.11257e-12	non-significant monotone/non-monotone	FALSE	FALSE	FALSE	FALSE	TRUE	TRUE	FALSE	FALSE
orfgcWin26	3682	0.0916287	0.0131165	0.037	0.969	0.0294433	0.962902	3682	0.0916287	0.0131165	0.047	0.973	0.0368518	0.967494	3.16864e-12	Monotone	FALSE	FALSE	FALSE	FALSE	FALSE	FALSE	FALSE	FALSE
orfgcWin27	3682	0.0921151	0.0143709	0.026	0.982	0.0317798	0.981438	3682	0.0921151	0.0143709	0.038	0.981	0.0274043	0.976807	2.92002e-13	Monotone	FALSE	FALSE	FALSE	FALSE	FALSE	FALSE	FALSE	FALSE
orfgcWin28	3682	0.0945499	0.0154354	0.008	0.94	0.00502856	0.940726	3682	0.0945499	0.0154354	0.006	0.956	0.0036701	0.941146	3.86256e-14	Monotone	TRUE	TRUE	FALSE	FALSE	TRUE	TRUE	FALSE	FALSE
orfgcWin29	3682	0.0969495	0.0144669	0.001	0.754	0.000677996	0.767313	3682	0.0969495	0.0144669	0.001	0.762	0.000667182	0.757508	2.43315e-13	non-significant monotone/non-monotone	TRUE	TRUE	FALSE	FALSE	TRUE	TRUE	FALSE	FALSE
orfgcWin30	3682	0.0951727	0.0163978	0.005	0.962	0.00242882	0.94871	3682	0.0951727	0.0163978	0.005	0.971	0.00278126	0.957096	6.20353e-15	Monotone	TRUE	TRUE	FALSE	FALSE	TRUE	TRUE	FALSE	FALSE
orfgcWin31	3682	0.0908664	0.0170157	0.072	1	0.058837	0.998985	3682	0.0908664	0.0170157	0.059	0.999	0.0612521	0.998497	1.91747e-15	MIC not significant	FALSE	FALSE	FALSE	FALSE	FALSE	FALSE	FALSE	FALSE
orfgcWin32	3682	0.090044	0.0159108	0.083	0.997	0.0901845	0.998045	3682	0.090044	0.0159108	0.109	0.999	0.105553	0.998217	1.56515e-14	MIC not significant	FALSE	FALSE	FALSE	FALSE	FALSE	FALSE	FALSE	FALSE
orfgcWin33	3682	0.0938506	0.0166092	0.006	0.984	0.00735275	0.981664	3682	0.0938506	0.0166092	0.019	0.992	0.0101196	0.982335	4.15096e-15	Monotone	TRUE	FALSE	FALSE	FALSE	TRUE	TRUE	FALSE	TRUE
orfgcWin34	3682	0.0924177	0.0167078	0.031	0.995	0.0234441	0.993124	3682	0.0924177	0.0167078	0.031	0.997	0.0276312	0.994509	3.44225e-15	Monotone	FALSE	FALSE	FALSE	FALSE	FALSE	FALSE	FALSE	FALSE
orfgcWin35	3682	0.0907514	0.0160451	0.067	0.999	0.0628159	0.997646	3682	0.0907514	0.0160451	0.058	0.999	0.0604187	0.997992	1.21252e-14	MIC not significant	FALSE	FALSE	FALSE	FALSE	FALSE	FALSE	FALSE	FALSE
orfgcWin36	3682	0.0952877	0.0177319	0.005	0.984	0.00247506	0.978476	3682	0.0952877	0.0177319	0.005	0.987	0.00311919	0.981436	4.91525e-16	Monotone	TRUE	TRUE	FALSE	TRUE	TRUE	TRUE	FALSE	TRUE
orfgcWin37	3682	0.0954016	0.0181482	0.007	0.985	0.0041929	0.974735	3682	0.0954016	0.0181482	0.002	0.985	0.00308964	0.980127	2.22791e-16	Monotone	TRUE	TRUE	FALSE	TRUE	TRUE	TRUE	FALSE	TRUE
orfgcWin38	3682	0.0979505	0.0174716	0.002	0.875	0.00025132	0.878474	3682	0.0979505	0.0174716	0.00078125	0.892177	0.000235862	0.888949	8.06194e-16	non-significant monotone/non-monotone	TRUE	TRUE	FALSE	FALSE	TRUE	TRUE	FALSE	FALSE
orfgcWin39	3682	0.100651	0.0193225	8.91089e-05	0.839584	1.15527e-05	0.839236	3682	0.100651	0.0193225	0.001	0.849	9.50375e-06	0.847639	2.39014e-17	non-significant monotone/non-monotone	TRUE	TRUE	FALSE	FALSE	TRUE	TRUE	FALSE	FALSE
orfgcWin40	3682	0.09828	0.0199244	0.000455446	0.969743	0.000174849	0.964509	3682	0.09828	0.0199244	0.00046875	0.970187	0.000161293	0.964947	7.60842e-18	Monotone	TRUE	TRUE	FALSE	FALSE	TRUE	TRUE	FALSE	FALSE
orfgcWin41	3682	0.101701	0.0212476	9.90099e-06	0.896822	3.30505e-06	0.893434	3682	0.101701	0.0212476	0	0.89577	3.03581e-06	0.892049	6.13825e-19	non-significant monotone/non-monotone	TRUE	TRUE	FALSE	FALSE	TRUE	TRUE	FALSE	FALSE
orfgcWin42	3682	0.10214	0.0217671	1.9802e-05	0.899515	1.82291e-06	0.89541	3682	0.10214	0.0217671	1.04167e-05	0.899885	1.72501e-06	0.895827	2.28386e-19	non-significant monotone/non-monotone	TRUE	TRUE	FALSE	FALSE	TRUE	TRUE	FALSE	FALSE
orfgcWin43	3682	0.10222	0.0216772	1.9802e-05	0.889178	1.72474e-06	0.886838	3682	0.10222	0.0216772	1.04167e-05	0.890188	1.68651e-06	0.887185	2.71025e-19	non-significant monotone/non-monotone	TRUE	TRUE	FALSE	FALSE	TRUE	TRUE	FALSE	FALSE
orfgcWin44	3682	0.0973407	0.0211167	0.001	0.992	0.000509127	0.991314	3682	0.0973407	0.0211167	0.001	0.996	0.0004282	0.991165	7.87531e-19	Monotone	TRUE	TRUE	FALSE	TRUE	TRUE	TRUE	FALSE	TRUE
orfgcWin45	3682	0.100764	0.019775	6.86275e-05	0.866667	1.09168e-05	0.863663	3682	0.100764	0.019775	7.29167e-05	0.864125	1.05491e-05	0.863895	1.01077e-17	non-significant monotone/non-monotone	TRUE	TRUE	FALSE	FALSE	TRUE	TRUE	FALSE	FALSE
orfgcWin46	3682	0.0993017	0.0207964	0.000267327	0.967238	5.96149e-05	0.962255	3682	0.0993017	0.0207964	0.000166667	0.966792	6.12922e-05	0.961963	1.44866e-18	Monotone	TRUE	TRUE	FALSE	FALSE	TRUE	TRUE	FALSE	FALSE
orfgcWin47	3682	0.0999117	0.0187069	0.000148515	0.854129	2.914e-05	0.851682	3682	0.0999117	0.0187069	0.000158416	0.849307	2.98465e-05	0.848443	7.70308e-17	non-significant monotone/non-monotone	TRUE	TRUE	FALSE	FALSE	TRUE	TRUE	FALSE	FALSE
orfgcWin48	3682	0.111972	0.0193782	0	0.0228614	1.13884e-13	0.0184841	3682	0.111972	0.0193782	0	0.0227525	1.1227e-13	0.0182614	2.1496e-17	Non-monotone	TRUE	TRUE	FALSE	FALSE	TRUE	TRUE	FALSE	FALSE
orfgcWin49	3682	0.103719	0.0173765	0	0.34902	2.05886e-07	0.355679	3682	0.103719	0.0173765	0	0.34643	2.11505e-07	0.35618	9.65936e-16	non-significant monotone/non-monotone	TRUE	TRUE	FALSE	FALSE	TRUE	TRUE	FALSE	FALSE
orfgcWin50	3682	0.100335	0.0172847	0.000108911	0.696644	1.86595e-05	0.703602	3682	0.100335	0.0172847	0.000145833	0.696313	1.88104e-05	0.703655	1.15001e-15	non-significant monotone/non-monotone	TRUE	TRUE	FALSE	FALSE	TRUE	TRUE	FALSE	FALSE
orfgcWin51	3682	0.0992896	0.0186055	0.000156863	0.884	5.89592e-05	0.880759	3682	0.0992896	0.0186055	0.000239583	0.882896	6.09656e-05	0.880317	9.34206e-17	non-significant monotone/non-monotone	TRUE	TRUE	FALSE	FALSE	TRUE	TRUE	FALSE	FALSE
orfgcWin52	3682	0.102109	0.0195607	0	0.743208	1.99666e-06	0.747299	3682	0.102109	0.0195607	3.06122e-05	0.743459	1.87632e-06	0.747494	1.51952e-17	non-significant monotone/non-monotone	TRUE	TRUE	FALSE	FALSE	TRUE	TRUE	FALSE	FALSE
orfgcWin53	3682	0.0994649	0.017217	0.000217822	0.769614	4.91773e-05	0.773704	3682	0.0994649	0.017217	0.000217822	0.769762	5.01212e-05	0.773086	1.30788e-15	non-significant monotone/non-monotone	TRUE	TRUE	FALSE	FALSE	TRUE	TRUE	FALSE	FALSE
orfgcWin54	3682	0.0939407	0.0182974	0.015	1	0.00858401	0.995067	3682	0.0939407	0.0182974	0.01179	0.99687	0.00864672	0.994735	1.67782e-16	Monotone	FALSE	TRUE	FALSE	FALSE	TRUE	TRUE	FALSE	TRUE
orfgcWin55	3682	0.0995289	0.016922	0.000158416	0.738228	4.64192e-05	0.743442	3682	0.0995289	0.016922	0.000166667	0.740156	4.73362e-05	0.743525	2.29116e-15	non-significant monotone/non-monotone	TRUE	TRUE	FALSE	FALSE	TRUE	TRUE	FALSE	FALSE
orfgcWin56	3682	0.0981189	0.0147548	0.000564356	0.663564	0.00020532	0.670905	3682	0.0981189	0.0147548	0.000635417	0.665271	0.000210708	0.672786	1.40772e-13	non-significant monotone/non-monotone	TRUE	TRUE	FALSE	FALSE	TRUE	TRUE	FALSE	FALSE
orfgcWin57	3682	0.100777	0.0163682	7.92079e-05	0.55195	1.12172e-05	0.563012	3682	0.100777	0.0163682	6.93069e-05	0.550911	1.03712e-05	0.564097	6.56283e-15	non-significant monotone/non-monotone	TRUE	TRUE	FALSE	FALSE	TRUE	TRUE	FALSE	FALSE
orfgcWin58	3682	0.0951563	0.0163805	0.009	0.967	0.00276326	0.957681	3682	0.0951563	0.0163805	0.009	0.963	0.00264253	0.950827	6.41114e-15	Monotone	TRUE	TRUE	FALSE	FALSE	TRUE	TRUE	FALSE	FALSE
orfgcWin59	3682	0.0947616	0.015545	0.009	0.942	0.00548812	0.934366	3682	0.0947616	0.015545	0.004	0.96	0.00460979	0.953603	3.1361e-14	Monotone	TRUE	TRUE	FALSE	FALSE	TRUE	TRUE	FALSE	FALSE
orfgcWin60	3682	0.0915001	0.0159101	0.038	0.997	0.0395773	0.995858	3682	0.0915001	0.0159101	0.048	0.997	0.0415599	0.995962	1.56728e-14	Monotone	FALSE	FALSE	FALSE	FALSE	FALSE	FALSE	FALSE	FALSE
orfgcWin61	3682	0.0995611	0.0157974	0.000196078	0.619833	4.21871e-05	0.630328	3682	0.0995611	0.0157974	0.000216495	0.619278	4.3276e-05	0.630121	1.94157e-14	non-significant monotone/non-monotone	TRUE	TRUE	FALSE	FALSE	TRUE	TRUE	FALSE	FALSE
orfgcWin62	3682	0.0965065	0.0153766	0.001	0.863	0.00102777	0.85864	3682	0.0965065	0.0153766	0.002	0.837	0.000716195	0.851574	4.31876e-14	non-significant monotone/non-monotone	TRUE	TRUE	FALSE	FALSE	TRUE	TRUE	FALSE	FALSE
orfgcWin63	3682	0.0947701	0.0157004	0.004	0.943	0.00473928	0.946833	3682	0.0947701	0.0157004	0.006	0.957	0.00378618	0.949327	2.33433e-14	Monotone	TRUE	TRUE	FALSE	FALSE	TRUE	TRUE	FALSE	FALSE
orfgcWin64	3682	0.0941061	0.0141553	0.011	0.92	0.00608328	0.919374	3682	0.0941061	0.0141553	0.01	0.912	0.0078125	0.914261	4.39884e-13	non-significant monotone/non-monotone	TRUE	TRUE	FALSE	FALSE	TRUE	TRUE	FALSE	FALSE
orfgcWin65	3682	0.0947617	0.0127429	0.009	0.825	0.00492387	0.806139	3682	0.0947617	0.0127429	0.01	0.779	0.0036347	0.787132	6.44688e-12	non-significant monotone/non-monotone	TRUE	TRUE	FALSE	FALSE	TRUE	TRUE	FALSE	FALSE
orfgcWin66	3682	0.0914181	0.0131071	0.052	0.975	0.0492086	0.967123	3682	0.0914181	0.0131071	0.051	0.971	0.0449556	0.965964	3.22582e-12	MIC not significant	FALSE	FALSE	FALSE	FALSE	FALSE	FALSE	FALSE	FALSE
orfgcWin67	3682	0.0993239	0.0123043	0.000227723	0.283109	5.71811e-05	0.289041	3682	0.0993239	0.0123043	0.000178218	0.279327	5.54791e-05	0.28794	1.48437e-11	non-significant monotone/non-monotone	TRUE	TRUE	FALSE	FALSE	TRUE	TRUE	FALSE	FALSE
orfgcWin68	3682	0.103898	0.0113109	0	0.0231881	1.58217e-07	0.0185229	3682	0.103898	0.0113109	9.90099e-06	0.0222376	1.51291e-07	0.0182496	9.82701e-11	Non-monotone	TRUE	TRUE	FALSE	FALSE	TRUE	TRUE	FALSE	FALSE
orfgcWin69	3682	0.0989141	0.0119457	0.000405941	0.286574	8.73725e-05	0.29406	3682	0.0989141	0.0119457	0.000291667	0.288573	9.2452e-05	0.295605	2.93651e-11	non-significant monotone/non-monotone	TRUE	TRUE	FALSE	FALSE	TRUE	TRUE	FALSE	FALSE
orfgcWin70	3682	0.0963503	0.0105938	0.002	0.393	0.00141618	0.406457	3682	0.0963503	0.0105938	0.003	0.392	0.00120822	0.408756	3.84912e-10	non-significant monotone/non-monotone	TRUE	TRUE	FALSE	FALSE	TRUE	TRUE	FALSE	FALSE
orfgcWin71	3682	0.0976863	0.0106596	0.001	0.281	0.000480552	0.294777	3682	0.0976863	0.0106596	0.001	0.282	0.000586856	0.298052	3.39587e-10	non-significant monotone/non-monotone	TRUE	TRUE	FALSE	FALSE	TRUE	TRUE	FALSE	FALSE
orfgcWin72	3682	0.097459	0.0125025	0.002	0.474	0.000599646	0.485509	3682	0.097459	0.0125025	0.003	0.498	0.000500719	0.508299	1.01832e-11	non-significant monotone/non-monotone	TRUE	TRUE	FALSE	FALSE	TRUE	TRUE	FALSE	FALSE
orfgcWin73	3680	0.0997525	0.0112784	0.000108911	0.172624	3.64798e-05	0.17301	3680	0.0997525	0.0112784	0.000135417	0.169604	3.59955e-05	0.170836	1.05752e-10	non-significant monotone/non-monotone	TRUE	TRUE	FALSE	FALSE	TRUE	TRUE	FALSE	FALSE
orfgcWin74	3680	0.0968749	0.0108237	0.004	0.38	0.00079722	0.39064	3680	0.0968749	0.0108237	0.001	0.368	0.000804308	0.391463	2.51226e-10	non-significant monotone/non-monotone	TRUE	TRUE	FALSE	FALSE	TRUE	TRUE	FALSE	FALSE
orfgcWin75	3680	0.0915533	0.0119076	0.046	0.937	0.0450987	0.925119	3680	0.0915533	0.0119076	0.049	0.936	0.0484664	0.935853	3.19594e-11	non-significant monotone/non-monotone	FALSE	FALSE	FALSE	FALSE	FALSE	FALSE	FALSE	FALSE
orfgcWin76	3680	0.0935724	0.0103157	0.013	0.68	0.00973023	0.692415	3680	0.0935724	0.0103157	0.017	0.688	0.0120528	0.68761	6.60863e-10	non-significant monotone/non-monotone	TRUE	FALSE	FALSE	FALSE	TRUE	TRUE	FALSE	FALSE
orfgcWin77	3680	0.0975273	0.00990066	0.001	0.242	0.00038907	0.241892	3680	0.0975273	0.00990066	0.00101031	0.232443	0.00038961	0.237457	1.45695e-09	non-significant monotone/non-monotone	TRUE	TRUE	FALSE	FALSE	TRUE	TRUE	FALSE	FALSE
orfgcWin78	3680	0.0982831	0.0111255	0.000582524	0.273825	0.000181902	0.27889	3680	0.0982831	0.0111255	0.001	0.251	0.000106943	0.253384	1.41468e-10	non-significant monotone/non-monotone	TRUE	TRUE	FALSE	FALSE	TRUE	TRUE	FALSE	FALSE
orfgcWin79	3680	0.0915814	0.0103007	0.06	0.863	0.0493891	0.857449	3680	0.0915814	0.0103007	0.042	0.848	0.0332579	0.845156	6.79952e-10	MIC not significant	FALSE	FALSE	FALSE	FALSE	FALSE	FALSE	FALSE	FALSE
orfgcWin80	3680	0.0909399	0.00844166	0.08	0.766	0.0733052	0.769304	3680	0.0909399	0.00844166	0.062	0.75	0.0559164	0.756949	2.35662e-08	MIC not significant	FALSE	FALSE	FALSE	FALSE	FALSE	FALSE	FALSE	FALSE
orfgcWin81	3680	0.0931357	0.00846963	0.016	0.55	0.0146714	0.553044	3680	0.0931357	0.00846963	0.017	0.524	0.0139261	0.538567	2.234e-08	non-significant monotone/non-monotone	FALSE	FALSE	FALSE	FALSE	TRUE	TRUE	FALSE	FALSE
orfgcWin82	3680	0.0906374	0.00853185	0.076	0.767	0.0735328	0.786247	3680	0.0906374	0.00853185	0.075	0.802	0.0624799	0.796006	1.98366e-08	MIC not significant	FALSE	FALSE	FALSE	FALSE	FALSE	FALSE	FALSE	FALSE
orfgcWin83	3680	0.0930011	0.00712939	0.024	0.384	0.0179901	0.409943	3680	0.0930011	0.00712939	0.01	0.407	0.0136706	0.400194	2.90444e-07	non-significant monotone/non-monotone	FALSE	TRUE	FALSE	FALSE	FALSE	TRUE	FALSE	FALSE
orfgcWin84	3680	0.0911549	0.00752133	0.058	0.655	0.0523111	0.660221	3680	0.0911549	0.00752133	0.061	0.623	0.0510265	0.627523	1.37035e-07	MIC not significant	FALSE	FALSE	FALSE	FALSE	FALSE	FALSE	FALSE	FALSE
orfgcWin85	3680	0.0931507	0.00917476	0.022	0.603	0.015824	0.616808	3680	0.0931507	0.00917476	0.02	0.596	0.0151026	0.610795	5.81401e-09	non-significant monotone/non-monotone	FALSE	FALSE	FALSE	FALSE	FALSE	TRUE	FALSE	FALSE
orfgcWin86	3680	0.0872682	0.00749457	0.273	0.936	0.288999	0.922087	3680	0.0872682	0.00749457	0.31	0.934	0.306854	0.92632	1.44243e-07	MIC not significant	FALSE	FALSE	FALSE	FALSE	FALSE	FALSE	FALSE	FALSE
orfgcWin87	3680	0.0882076	0.00822888	0.188	0.912	0.199693	0.904658	3680	0.0882076	0.00822888	0.224	0.917	0.210006	0.919221	3.53906e-08	MIC not significant	FALSE	FALSE	FALSE	FALSE	FALSE	FALSE	FALSE	FALSE
orfgcWin88	3680	0.0882857	0.00896329	0.19	0.932	0.195929	0.937029	3680	0.0882857	0.00896329	0.194	0.946	0.216584	0.9413	8.70394e-09	MIC not significant	FALSE	FALSE	FALSE	FALSE	FALSE	FALSE	FALSE	FALSE
orfgcWin89	3680	0.0879355	0.00856031	0.251	0.955	0.246415	0.944232	3680	0.0879355	0.00856031	0.229	0.941	0.232007	0.942611	1.8787e-08	MIC not significant	FALSE	FALSE	FALSE	FALSE	FALSE	FALSE	FALSE	FALSE
orfgcWin90	3680	0.0840803	0.00979472	0.625	1	0.633616	0.998529	3680	0.0840803	0.00979472	0.636	0.999	0.639753	0.998338	1.78285e-09	MIC not significant	FALSE	FALSE	FALSE	FALSE	FALSE	FALSE	FALSE	FALSE
orfgcWin91	3680	0.0904617	0.0101791	0.086	0.913	0.0763467	0.905288	3680	0.0904617	0.0101791	0.073	0.914	0.0762137	0.904972	8.57171e-10	MIC not significant	FALSE	FALSE	FALSE	FALSE	FALSE	FALSE	FALSE	FALSE
orfgcWin92	3680	0.0890037	0.00889431	0.157	0.92	0.164854	0.911734	3680	0.0890037	0.00889431	0.163	0.914	0.16528	0.899498	9.92876e-09	MIC not significant	FALSE	FALSE	FALSE	FALSE	FALSE	FALSE	FALSE	FALSE
orfgcWin93	3680	0.0885802	0.0107334	0.193	0.988	0.201478	0.981791	3680	0.0885802	0.0107334	0.196	0.992	0.180605	0.97926	2.98336e-10	MIC not significant	FALSE	FALSE	FALSE	FALSE	FALSE	FALSE	FALSE	FALSE
orfgcWin94	3679	0.0885165	0.0110583	0.168	0.984	0.17328	0.979328	3679	0.0885165	0.0110583	0.192	0.981	0.198482	0.976738	1.61665e-10	MIC not significant	FALSE	FALSE	FALSE	FALSE	FALSE	FALSE	FALSE	FALSE
orfgcWin95	3679	0.0874562	0.00971016	0.285	0.979	0.293856	0.978456	3679	0.0874562	0.00971016	0.28	0.988	0.287688	0.980002	2.10514e-09	MIC not significant	FALSE	FALSE	FALSE	FALSE	FALSE	FALSE	FALSE	FALSE
orfgcWin96	3679	0.0848267	0.0103392	0.564	1	0.572125	0.998238	3679	0.0848267	0.0103392	0.543941	0.999287	0.554212	0.998135	6.35226e-10	MIC not significant	FALSE	FALSE	FALSE	FALSE	FALSE	FALSE	FALSE	FALSE
orfgcWin97	3679	0.0846869	0.00972377	0.572	0.997	0.587695	0.996949	3679	0.0846869	0.00972377	0.549	0.998	0.569913	0.99741	2.05123e-09	MIC not significant	FALSE	FALSE	FALSE	FALSE	FALSE	FALSE	FALSE	FALSE
orfgcWin98	3679	0.0867202	0.00973805	0.33	0.991	0.334775	0.985797	3679	0.0867202	0.00973805	0.359	0.987	0.350733	0.984077	1.99618e-09	MIC not significant	FALSE	FALSE	FALSE	FALSE	FALSE	FALSE	FALSE	FALSE
orfgcWin99	3679	0.0885077	0.0108656	0.195	0.982	0.189864	0.978626	3679	0.0885077	0.0108656	0.213	0.977	0.219357	0.975356	2.33272e-10	MIC not significant	FALSE	FALSE	FALSE	FALSE	FALSE	FALSE	FALSE	FALSE
orfgcWin100	3679	0.0896794	0.0116407	0.124	0.982	0.119435	0.977915	3679	0.0896794	0.0116407	0.123	0.982	0.126068	0.977697	5.34139e-11	MIC not significant	FALSE	FALSE	FALSE	FALSE	FALSE	FALSE	FALSE	FALSE
orfmeanFEWin1	3682	0.0895527	0.00546193	0.108	0.584	0.108427	0.585181	3682	0.0895527	0.00546193	0.119	0.581	0.125384	0.5977	7.15158e-06	MIC not significant	FALSE	FALSE	FALSE	FALSE	FALSE	FALSE	FALSE	FALSE
orfmeanFEWin2	3682	0.091482	0.00543198	0.055	0.373	0.0484046	0.396596	3682	0.091482	0.00543198	0.058	0.365	0.0461318	0.390275	7.57809e-06	MIC not significant	FALSE	FALSE	FALSE	FALSE	FALSE	FALSE	FALSE	FALSE
orfmeanFEWin3	3682	0.0907016	0.00549354	0.091	0.47	0.0812172	0.49572	3682	0.0907016	0.00549354	0.064	0.452	0.0669419	0.461501	6.72753e-06	MIC not significant	FALSE	FALSE	FALSE	FALSE	FALSE	FALSE	FALSE	FALSE
orfmeanFEWin4	3682	0.0910531	0.0047936	0.076	0.364	0.0650718	0.37774	3682	0.0910531	0.0047936	0.059	0.355	0.0554623	0.362133	2.61298e-05	MIC not significant	FALSE	FALSE	FALSE	FALSE	FALSE	FALSE	FALSE	FALSE
orfmeanFEWin5	3682	0.0896054	0.00597778	0.12	0.638	0.111278	0.646612	3682	0.0896054	0.00597778	0.12	0.654	0.131484	0.671221	2.64086e-06	MIC not significant	FALSE	FALSE	FALSE	FALSE	FALSE	FALSE	FALSE	FALSE
orfmeanFEWin6	3682	0.0855545	0.00579369	0.473	0.92	0.470037	0.920092	3682	0.0855545	0.00579369	0.464	0.94	0.473172	0.930818	3.76707e-06	MIC not significant	FALSE	FALSE	FALSE	FALSE	FALSE	FALSE	FALSE	FALSE
orfmeanFEWin7	3682	0.0840025	0.00440236	0.633	0.935	0.638268	0.931707	3682	0.0840025	0.00440236	0.641	0.923	0.629176	0.927181	5.59735e-05	MIC not significant	FALSE	FALSE	FALSE	FALSE	FALSE	FALSE	FALSE	FALSE
orfmeanFEWin8	3682	0.0841259	0.00410061	0.625	0.915	0.625462	0.915427	3682	0.0841259	0.00410061	0.597	0.933	0.628569	0.921315	0.00010093	MIC not significant	FALSE	FALSE	FALSE	FALSE	FALSE	FALSE	FALSE	FALSE
orfmeanFEWin9	3682	0.0818138	0.0029926	0.831	0.967	0.831194	0.955415	3682	0.0818138	0.0029926	0.837	0.972	0.828531	0.957468	0.000897556	MIC not significant	FALSE	FALSE	FALSE	FALSE	FALSE	FALSE	FALSE	FALSE
orfmeanFEWin10	3682	0.0808368	0.00169985	0.89	0.954	0.888955	0.94792	3682	0.0808368	0.00169985	0.91	0.97	0.89739	0.951268	0.01235	MIC not significant	FALSE	FALSE	FALSE	FALSE	FALSE	FALSE	FALSE	FALSE
orfmeanFEWin11	3682	0.0815135	0.00137804	0.847	0.91	0.846637	0.909213	3682	0.0815135	0.00137804	0.841	0.904	0.850308	0.910084	0.0242871	MIC not significant	FALSE	FALSE	FALSE	FALSE	FALSE	FALSE	FALSE	FALSE
orfmeanFEWin12	3682	0.0791415	0.000701451	0.964	0.969	0.953804	0.964344	3682	0.0791415	0.000701451	0.962	0.972	0.958143	0.968068	0.108092	MIC not significant	FALSE	FALSE	FALSE	FALSE	FALSE	FALSE	FALSE	FALSE
orfmeanFEWin13	3682	0.0820058	0.000577057	0.82	0.857	0.824012	0.843837	3682	0.0820058	0.000577057	0.802	0.821	0.803275	0.825335	0.145018	MIC not significant	FALSE	FALSE	FALSE	FALSE	FALSE	FALSE	FALSE	FALSE
orfmeanFEWin14	3682	0.0781077	0.000248537	0.986	0.986	0.975259	0.974603	3682	0.0781077	0.000248537	0.98	0.982	0.975799	0.975498	0.338896	MIC not significant	FALSE	FALSE	FALSE	FALSE	FALSE	FALSE	FALSE	FALSE
orfmeanFEWin15	3682	0.0775956	5.13118e-05	0.983	0.983	0.983858	0.981053	3682	0.0775956	5.13118e-05	0.99	0.987	0.984776	0.982616	0.663912	MIC not significant	FALSE	FALSE	FALSE	FALSE	FALSE	FALSE	FALSE	FALSE
orfmeanFEWin16	3682	0.0790708	9.27702e-05	0.959	0.956	0.956996	0.953276	3682	0.0790708	9.27702e-05	0.959	0.955	0.953194	0.948564	0.559043	MIC not significant	FALSE	FALSE	FALSE	FALSE	FALSE	FALSE	FALSE	FALSE
orfmeanFEWin17	3682	0.0816164	0.000212836	0.804	0.8	0.819595	0.817482	3682	0.0816164	0.000212836	0.852	0.847	0.84025	0.835993	0.37616	MIC not significant	FALSE	FALSE	FALSE	FALSE	FALSE	FALSE	FALSE	FALSE
orfmeanFEWin18	3682	0.0812928	0.000320531	0.857	0.867	0.860501	0.86361	3682	0.0812928	0.000320531	0.882	0.881	0.868002	0.870348	0.277441	MIC not significant	FALSE	FALSE	FALSE	FALSE	FALSE	FALSE	FALSE	FALSE
orfmeanFEWin19	3682	0.0810865	0.000921167	0.882	0.909	0.879478	0.910503	3682	0.0810865	0.000921167	0.876	0.91	0.872037	0.906688	0.0655533	MIC not significant	FALSE	FALSE	FALSE	FALSE	FALSE	FALSE	FALSE	FALSE
orfmeanFEWin20	3682	0.0804584	0.00170597	0.906	0.956	0.904772	0.954103	3682	0.0804584	0.00170597	0.908	0.962	0.908943	0.958965	0.0121938	MIC not significant	FALSE	FALSE	FALSE	FALSE	FALSE	FALSE	FALSE	FALSE
orfmeanFEWin21	3682	0.0810853	0.00289024	0.875	0.969	0.873102	0.966959	3682	0.0810853	0.00289024	0.886	0.983	0.879194	0.971348	0.00110069	MIC not significant	FALSE	FALSE	FALSE	FALSE	FALSE	FALSE	FALSE	FALSE
orfmeanFEWin22	3682	0.0855545	0.00397789	0.44	0.828	0.470462	0.831548	3682	0.0855545	0.00397789	0.458	0.81	0.469858	0.822363	0.000128351	MIC not significant	FALSE	FALSE	FALSE	FALSE	FALSE	FALSE	FALSE	FALSE
orfmeanFEWin23	3682	0.0852843	0.0037796	0.481	0.834	0.501843	0.826783	3682	0.0852843	0.0037796	0.501	0.836	0.501254	0.837035	0.000189405	MIC not significant	FALSE	FALSE	FALSE	FALSE	FALSE	FALSE	FALSE	FALSE
orfmeanFEWin24	3682	0.0862491	0.00423557	0.394	0.784	0.394174	0.791124	3682	0.0862491	0.00423557	0.39	0.794	0.406557	0.792229	7.75185e-05	MIC not significant	FALSE	FALSE	FALSE	FALSE	FALSE	FALSE	FALSE	FALSE
orfmeanFEWin25	3682	0.0841429	0.00456268	0.617	0.941	0.622551	0.935933	3682	0.0841429	0.00456268	0.593	0.935	0.608904	0.928543	4.09511e-05	MIC not significant	FALSE	FALSE	FALSE	FALSE	FALSE	FALSE	FALSE	FALSE
orfmeanFEWin26	3682	0.0909433	0.00534507	0.077	0.449	0.0801436	0.458943	3682	0.0909433	0.00534507	0.068	0.423	0.0599057	0.43349	8.96611e-06	MIC not significant	FALSE	FALSE	FALSE	FALSE	FALSE	FALSE	FALSE	FALSE
orfmeanFEWin27	3682	0.0894143	0.0068686	0.141	0.756	0.132799	0.756372	3682	0.0894143	0.0068686	0.141	0.753	0.139677	0.754034	4.75629e-07	MIC not significant	FALSE	FALSE	FALSE	FALSE	FALSE	FALSE	FALSE	FALSE
orfmeanFEWin28	3682	0.0885116	0.00786001	0.196	0.876	0.196808	0.880512	3682	0.0885116	0.00786001	0.164	0.87	0.172987	0.869859	7.10759e-08	MIC not significant	FALSE	FALSE	FALSE	FALSE	FALSE	FALSE	FALSE	FALSE
orfmeanFEWin29	3682	0.0899675	0.00877422	0.113	0.859	0.111853	0.855113	3682	0.0899675	0.00877422	0.098	0.864	0.105478	0.861978	1.23742e-08	MIC not significant	FALSE	FALSE	FALSE	FALSE	FALSE	FALSE	FALSE	FALSE
orfmeanFEWin30	3682	0.0904599	0.0103806	0.083	0.92	0.0787627	0.913712	3682	0.0904599	0.0103806	0.089	0.923	0.0793487	0.915238	5.77751e-10	MIC not significant	FALSE	FALSE	FALSE	FALSE	FALSE	FALSE	FALSE	FALSE
orfmeanFEWin31	3682	0.0911639	0.0116392	0.049	0.94	0.0499598	0.93086	3682	0.0911639	0.0116392	0.056	0.94	0.0505114	0.933111	5.26101e-11	MIC not significant	FALSE	FALSE	FALSE	FALSE	FALSE	FALSE	FALSE	FALSE
orfmeanFEWin32	3682	0.089004	0.0108646	0.154	0.981	0.163182	0.971567	3682	0.089004	0.0108646	0.164	0.976	0.154691	0.967717	2.29821e-10	MIC not significant	FALSE	FALSE	FALSE	FALSE	FALSE	FALSE	FALSE	FALSE
orfmeanFEWin33	3682	0.0886815	0.0115048	0.172	0.991	0.164459	0.987	3682	0.0886815	0.0115048	0.164	0.992	0.15804	0.985894	6.7948e-11	MIC not significant	FALSE	FALSE	FALSE	FALSE	FALSE	FALSE	FALSE	FALSE
orfmeanFEWin34	3682	0.0951523	0.0117162	0.006	0.668	0.00401194	0.680532	3682	0.0951523	0.0117162	0.001	0.663	0.00197489	0.669277	4.544e-11	non-significant monotone/non-monotone	TRUE	TRUE	FALSE	FALSE	TRUE	TRUE	FALSE	FALSE
orfmeanFEWin35	3682	0.0919917	0.0109158	0.044	0.862	0.0367998	0.857525	3682	0.0919917	0.0109158	0.045	0.879	0.0373295	0.873728	2.08464e-10	non-significant monotone/non-monotone	FALSE	FALSE	FALSE	FALSE	FALSE	FALSE	FALSE	FALSE
orfmeanFEWin36	3682	0.0924234	0.0114074	0.036	0.849	0.0300616	0.861666	3682	0.0924234	0.0114074	0.027	0.843	0.0232635	0.855059	8.17842e-11	non-significant monotone/non-monotone	FALSE	FALSE	FALSE	FALSE	FALSE	FALSE	FALSE	FALSE
orfmeanFEWin37	3682	0.0908231	0.012055	0.082	0.973	0.0725091	0.957334	3682	0.0908231	0.012055	0.056	0.963	0.0585115	0.961226	2.38527e-11	MIC not significant	FALSE	FALSE	FALSE	FALSE	FALSE	FALSE	FALSE	FALSE
orfmeanFEWin38	3682	0.0939709	0.0116681	0.01	0.785	0.00661166	0.776886	3682	0.0939709	0.0116681	0.014	0.75	0.0106913	0.765738	4.97909e-11	non-significant monotone/non-monotone	TRUE	TRUE	FALSE	FALSE	TRUE	TRUE	FALSE	FALSE
orfmeanFEWin39	3682	0.0920015	0.0136473	0.024	0.971	0.0252	0.968672	3682	0.0920015	0.0136473	0.032	0.976	0.0256579	0.969981	1.15514e-12	Monotone	FALSE	FALSE	FALSE	FALSE	FALSE	FALSE	FALSE	FALSE
orfmeanFEWin40	3682	0.094301	0.0141132	0.007	0.917	0.0057508	0.910194	3682	0.094301	0.0141132	0.012	0.905	0.0066264	0.902101	4.76533e-13	non-significant monotone/non-monotone	TRUE	TRUE	FALSE	FALSE	TRUE	TRUE	FALSE	FALSE
orfmeanFEWin41	3682	0.0906833	0.0126499	0.075	0.982	0.0661039	0.975502	3682	0.0906833	0.0126499	0.093	0.977	0.0805942	0.964711	7.69351e-12	MIC not significant	FALSE	FALSE	FALSE	FALSE	FALSE	FALSE	FALSE	FALSE
orfmeanFEWin42	3682	0.0893815	0.0134125	0.138	0.994	0.13094	0.994053	3682	0.0893815	0.0134125	0.123	0.994	0.121905	0.991629	1.80508e-12	MIC not significant	FALSE	FALSE	FALSE	FALSE	FALSE	FALSE	FALSE	FALSE
orfmeanFEWin43	3682	0.0910392	0.0130374	0.056	0.973	0.0553764	0.974651	3682	0.0910392	0.0130374	0.05	0.982	0.0506876	0.97116	3.68289e-12	MIC not significant	FALSE	FALSE	FALSE	FALSE	FALSE	FALSE	FALSE	FALSE
orfmeanFEWin44	3682	0.0914239	0.0125383	0.046	0.962	0.0466179	0.95592	3682	0.0914239	0.0125383	0.063	0.964	0.0480261	0.950493	9.51287e-12	MIC not significant	FALSE	FALSE	FALSE	FALSE	FALSE	FALSE	FALSE	FALSE
orfmeanFEWin45	3682	0.0911961	0.011962	0.056	0.947	0.0543626	0.942058	3682	0.0911961	0.011962	0.048	0.93	0.0459773	0.929687	2.84669e-11	MIC not significant	FALSE	FALSE	FALSE	FALSE	FALSE	FALSE	FALSE	FALSE
orfmeanFEWin46	3682	0.0929448	0.0114216	0.023	0.839	0.0200333	0.831664	3682	0.0929448	0.0114216	0.02	0.804	0.0197366	0.815321	7.95958e-11	non-significant monotone/non-monotone	FALSE	FALSE	FALSE	FALSE	FALSE	FALSE	FALSE	FALSE
orfmeanFEWin47	3682	0.0946752	0.011098	0.005	0.654	0.00438088	0.649376	3682	0.0946752	0.011098	0.011	0.629	0.0053166	0.632951	1.47383e-10	non-significant monotone/non-monotone	TRUE	TRUE	FALSE	FALSE	TRUE	TRUE	FALSE	FALSE
orfmeanFEWin48	3682	0.0921198	0.00983377	0.044	0.78	0.029357	0.784481	3682	0.0921198	0.00983377	0.026	0.771	0.0289344	0.774836	1.63829e-09	non-significant monotone/non-monotone	FALSE	FALSE	FALSE	FALSE	FALSE	FALSE	FALSE	FALSE
orfmeanFEWin49	3682	0.0925516	0.00970639	0.027	0.74	0.022909	0.730264	3682	0.0925516	0.00970639	0.019	0.69	0.0167807	0.705982	2.08871e-09	non-significant monotone/non-monotone	FALSE	FALSE	FALSE	FALSE	FALSE	TRUE	FALSE	FALSE
orfmeanFEWin50	3682	0.0904723	0.0089421	0.083	0.806	0.0797911	0.81321	3682	0.0904723	0.0089421	0.078	0.841	0.0774158	0.838622	8.97984e-09	MIC not significant	FALSE	FALSE	FALSE	FALSE	FALSE	FALSE	FALSE	FALSE
orfmeanFEWin51	3682	0.09069	0.00921698	0.084	0.834	0.0725512	0.829119	3682	0.09069	0.00921698	0.065	0.852	0.0620407	0.838468	5.31338e-09	MIC not significant	FALSE	FALSE	FALSE	FALSE	FALSE	FALSE	FALSE	FALSE
orfmeanFEWin52	3682	0.0908099	0.00786102	0.062	0.704	0.0631279	0.711382	3682	0.0908099	0.00786102	0.077	0.697	0.0604207	0.713343	7.09383e-08	MIC not significant	FALSE	FALSE	FALSE	FALSE	FALSE	FALSE	FALSE	FALSE
orfmeanFEWin53	3682	0.0976693	0.00727452	0.000930693	0.0740891	0.00032674	0.0690528	3682	0.0976693	0.00727452	0.001	0.074	0.00033372	0.0672727	2.1824e-07	non-significant monotone/non-monotone	TRUE	TRUE	FALSE	FALSE	TRUE	TRUE	FALSE	FALSE
orfmeanFEWin54	3682	0.0929458	0.00672822	0.011	0.386	0.0155933	0.374937	3682	0.0929458	0.00672822	0.023	0.369	0.016861	0.373092	6.22862e-07	non-significant monotone/non-monotone	TRUE	FALSE	FALSE	FALSE	FALSE	TRUE	FALSE	FALSE
orfmeanFEWin55	3682	0.0925261	0.00541957	0.03	0.285	0.0254735	0.282694	3682	0.0925261	0.00541957	0.027	0.266	0.0220377	0.272285	7.76222e-06	non-significant monotone/non-monotone	FALSE	FALSE	FALSE	FALSE	FALSE	FALSE	FALSE	FALSE
orfmeanFEWin56	3682	0.0935749	0.00376124	0.011	0.113	0.0112489	0.0935666	3682	0.0935749	0.00376124	0.019	0.078	0.00911329	0.0834068	0.000196361	non-significant monotone/non-monotone	TRUE	FALSE	FALSE	FALSE	TRUE	TRUE	FALSE	FALSE
orfmeanFEWin57	3682	0.0903708	0.00493062	0.082	0.441	0.0783635	0.450554	3682	0.0903708	0.00493062	0.068	0.425	0.0725681	0.431898	2.00232e-05	MIC not significant	FALSE	FALSE	FALSE	FALSE	FALSE	FALSE	FALSE	FALSE
orfmeanFEWin58	3682	0.0867296	0.00517416	0.34	0.821	0.35418	0.824153	3682	0.0867296	0.00517416	0.308	0.826	0.329525	0.81719	1.24845e-05	MIC not significant	FALSE	FALSE	FALSE	FALSE	FALSE	FALSE	FALSE	FALSE
orfmeanFEWin59	3682	0.0848079	0.00420834	0.555	0.895	0.565227	0.889545	3682	0.0848079	0.00420834	0.528	0.899	0.554931	0.891035	8.17553e-05	MIC not significant	FALSE	FALSE	FALSE	FALSE	FALSE	FALSE	FALSE	FALSE
orfmeanFEWin60	3682	0.080616	0.00501571	0.908	0.997	0.902749	0.995213	3682	0.080616	0.00501571	0.915	0.995	0.90507	0.996013	1.69748e-05	MIC not significant	FALSE	FALSE	FALSE	FALSE	FALSE	FALSE	FALSE	FALSE
orfmeanFEWin61	3682	0.0831798	0.00457977	0.718	0.975	0.71367	0.959258	3682	0.0831798	0.00457977	0.717	0.97	0.727821	0.962878	3.961e-05	MIC not significant	FALSE	FALSE	FALSE	FALSE	FALSE	FALSE	FALSE	FALSE
orfmeanFEWin62	3682	0.085436	0.0041303	0.489	0.847	0.478802	0.853773	3682	0.085436	0.0041303	0.453	0.841	0.467406	0.838224	9.52343e-05	MIC not significant	FALSE	FALSE	FALSE	FALSE	FALSE	FALSE	FALSE	FALSE
orfmeanFEWin63	3682	0.085384	0.00437486	0.486	0.87	0.500686	0.871029	3682	0.085384	0.00437486	0.476	0.88	0.491824	0.862294	5.90584e-05	MIC not significant	FALSE	FALSE	FALSE	FALSE	FALSE	FALSE	FALSE	FALSE
orfmeanFEWin64	3682	0.0823479	0.00433755	0.796	0.984	0.796275	0.975567	3682	0.0823479	0.00433755	0.8	0.976	0.795305	0.973793	6.35194e-05	MIC not significant	FALSE	FALSE	FALSE	FALSE	FALSE	FALSE	FALSE	FALSE
orfmeanFEWin65	3682	0.08181	0.00427612	0.83	0.992	0.827579	0.980139	3682	0.08181	0.00427612	0.835	0.98	0.831403	0.980647	7.16142e-05	MIC not significant	FALSE	FALSE	FALSE	FALSE	FALSE	FALSE	FALSE	FALSE
orfmeanFEWin66	3682	0.0820555	0.00434983	0.8	0.986	0.807105	0.978629	3682	0.0820555	0.00434983	0.828	0.983	0.824916	0.978985	6.20147e-05	MIC not significant	FALSE	FALSE	FALSE	FALSE	FALSE	FALSE	FALSE	FALSE
orfmeanFEWin67	3682	0.081506	0.0049497	0.862	0.992	0.853539	0.99077	3682	0.081506	0.0049497	0.841	0.994	0.844559	0.989717	1.92951e-05	MIC not significant	FALSE	FALSE	FALSE	FALSE	FALSE	FALSE	FALSE	FALSE
orfmeanFEWin68	3682	0.0783384	0.00480599	0.977	0.999	0.970467	0.999119	3682	0.0783384	0.00480599	0.976545	0.999624	0.971255	0.999166	2.55081e-05	MIC not significant	FALSE	FALSE	FALSE	FALSE	FALSE	FALSE	FALSE	FALSE
orfmeanFEWin69	3682	0.0872171	0.00442329	0.303	0.738	0.306093	0.741455	3682	0.0872171	0.00442329	0.296	0.714	0.292549	0.727017	5.37338e-05	MIC not significant	FALSE	FALSE	FALSE	FALSE	FALSE	FALSE	FALSE	FALSE
orfmeanFEWin70	3682	0.0813294	0.00429834	0.852	0.986	0.848303	0.983727	3682	0.0813294	0.00429834	0.879	0.995	0.875701	0.989522	6.85731e-05	MIC not significant	FALSE	FALSE	FALSE	FALSE	FALSE	FALSE	FALSE	FALSE
orfmeanFEWin71	3682	0.0843156	0.00382995	0.581	0.902	0.601389	0.89414	3682	0.0843156	0.00382995	0.605	0.903	0.623634	0.905343	0.000171568	MIC not significant	FALSE	FALSE	FALSE	FALSE	FALSE	FALSE	FALSE	FALSE
orfmeanFEWin72	3682	0.082765	0.00419744	0.749	0.972	0.756206	0.96231	3682	0.082765	0.00419744	0.755	0.96	0.748245	0.955583	8.35156e-05	MIC not significant	FALSE	FALSE	FALSE	FALSE	FALSE	FALSE	FALSE	FALSE
orfmeanFEWin73	3680	0.0882341	0.00470814	0.195	0.652	0.197138	0.653688	3680	0.0882341	0.00470814	0.211	0.653	0.221676	0.659788	3.10067e-05	MIC not significant	FALSE	FALSE	FALSE	FALSE	FALSE	FALSE	FALSE	FALSE
orfmeanFEWin74	3680	0.0920003	0.00573107	0.036	0.363	0.0335237	0.363704	3680	0.0920003	0.00573107	0.034	0.378	0.03295	0.382105	4.2767e-06	non-significant monotone/non-monotone	FALSE	FALSE	FALSE	FALSE	FALSE	FALSE	FALSE	FALSE
orfmeanFEWin75	3680	0.0920262	0.00498561	0.038	0.289	0.0307933	0.290133	3680	0.0920262	0.00498561	0.039	0.296	0.0358702	0.30029	1.80907e-05	non-significant monotone/non-monotone	FALSE	FALSE	FALSE	FALSE	FALSE	FALSE	FALSE	FALSE
orfmeanFEWin76	3680	0.0913063	0.00417279	0.062	0.289	0.0601903	0.300547	3680	0.0913063	0.00417279	0.048	0.268	0.047264	0.280244	8.80287e-05	MIC not significant	FALSE	FALSE	FALSE	FALSE	FALSE	FALSE	FALSE	FALSE
orfmeanFEWin77	3680	0.0914233	0.00279346	0.041	0.138	0.0393641	0.148054	3680	0.0914233	0.00279346	0.051	0.175	0.0530754	0.176667	0.00133946	MIC not significant	FALSE	FALSE	FALSE	FALSE	FALSE	FALSE	FALSE	FALSE
orfmeanFEWin78	3680	0.0926278	0.0024039	0.031	0.084	0.0250996	0.084275	3680	0.0926278	0.0024039	0.028	0.076	0.0232316	0.077572	0.00292929	non-significant monotone/non-monotone	FALSE	FALSE	FALSE	FALSE	FALSE	FALSE	FALSE	FALSE
orfmeanFEWin79	3680	0.0916039	0.00238481	0.041	0.124	0.0395335	0.117799	3680	0.0916039	0.00238481	0.04	0.118	0.0424369	0.124702	0.00304447	non-significant monotone/non-monotone	FALSE	FALSE	FALSE	FALSE	FALSE	FALSE	FALSE	FALSE
orfmeanFEWin80	3680	0.0941997	0.00226714	0.011	0.033	0.00728489	0.0291413	3680	0.0941997	0.00226714	0.015	0.047	0.0086995	0.0333631	0.00386351	Non-monotone	TRUE	FALSE	FALSE	FALSE	TRUE	TRUE	FALSE	FALSE
orfmeanFEWin81	3680	0.0930149	0.00245978	0.026	0.074	0.0197574	0.0679629	3680	0.0930149	0.00245978	0.029	0.083	0.0198417	0.0718363	0.00261695	non-significant monotone/non-monotone	FALSE	FALSE	FALSE	FALSE	FALSE	FALSE	FALSE	FALSE
orfmeanFEWin82	3680	0.0882149	0.00246811	0.199	0.397	0.195694	0.400848	3680	0.0882149	0.00246811	0.203	0.397	0.20498	0.41064	0.00257334	MIC not significant	FALSE	FALSE	FALSE	FALSE	FALSE	FALSE	FALSE	FALSE
orfmeanFEWin83	3680	0.0865661	0.00193754	0.35	0.534	0.357902	0.538493	3680	0.0865661	0.00193754	0.352	0.524	0.373631	0.545801	0.00757117	MIC not significant	FALSE	FALSE	FALSE	FALSE	FALSE	FALSE	FALSE	FALSE
orfmeanFEWin84	3680	0.0864799	0.00206425	0.356	0.562	0.376642	0.57113	3680	0.0864799	0.00206425	0.369	0.571	0.383867	0.572437	0.00583972	MIC not significant	FALSE	FALSE	FALSE	FALSE	FALSE	FALSE	FALSE	FALSE
orfmeanFEWin85	3680	0.0864773	0.00248629	0.381	0.603	0.389267	0.624322	3680	0.0864773	0.00248629	0.381	0.582	0.367598	0.598976	0.00248076	MIC not significant	FALSE	FALSE	FALSE	FALSE	FALSE	FALSE	FALSE	FALSE
orfmeanFEWin86	3680	0.0870984	0.0023958	0.291	0.517	0.311292	0.531024	3680	0.0870984	0.0023958	0.295	0.505	0.303896	0.523648	0.00297765	MIC not significant	FALSE	FALSE	FALSE	FALSE	FALSE	FALSE	FALSE	FALSE
orfmeanFEWin87	3680	0.0860513	0.00257983	0.42	0.662	0.437793	0.679528	3680	0.0860513	0.00257983	0.409	0.648	0.415926	0.658422	0.00205518	MIC not significant	FALSE	FALSE	FALSE	FALSE	FALSE	FALSE	FALSE	FALSE
orfmeanFEWin88	3680	0.085151	0.00318141	0.488	0.794	0.497482	0.786268	3680	0.085151	0.00318141	0.472	0.778	0.482497	0.781274	0.000618885	MIC not significant	FALSE	FALSE	FALSE	FALSE	FALSE	FALSE	FALSE	FALSE
orfmeanFEWin89	3680	0.0848234	0.00461027	0.542	0.9	0.53958	0.90028	3680	0.0848234	0.00461027	0.516	0.908	0.541932	0.897135	3.75089e-05	MIC not significant	FALSE	FALSE	FALSE	FALSE	FALSE	FALSE	FALSE	FALSE
orfmeanFEWin90	3680	0.0824656	0.00484109	0.779	0.991	0.79082	0.981343	3680	0.0824656	0.00484109	0.771	0.984	0.775715	0.976457	2.39481e-05	MIC not significant	FALSE	FALSE	FALSE	FALSE	FALSE	FALSE	FALSE	FALSE
orfmeanFEWin91	3680	0.0796645	0.00440913	0.939	0.996	0.939403	0.996333	3680	0.0796645	0.00440913	0.945	0.997	0.943341	0.996742	5.54972e-05	MIC not significant	FALSE	FALSE	FALSE	FALSE	FALSE	FALSE	FALSE	FALSE
orfmeanFEWin92	3680	0.0805855	0.00370951	0.91	0.989	0.897727	0.98629	3680	0.0805855	0.00370951	0.917	0.994	0.909102	0.989484	0.000218246	MIC not significant	FALSE	FALSE	FALSE	FALSE	FALSE	FALSE	FALSE	FALSE
orfmeanFEWin93	3680	0.0823404	0.00351066	0.762	0.953	0.769868	0.944362	3680	0.0823404	0.00351066	0.785	0.962	0.778877	0.951104	0.000322813	MIC not significant	FALSE	FALSE	FALSE	FALSE	FALSE	FALSE	FALSE	FALSE
orfmeanFEWin94	3679	0.0869696	0.00282669	0.327	0.603	0.335804	0.607567	3679	0.0869696	0.00282669	0.311	0.614	0.329043	0.601389	0.00125535	MIC not significant	FALSE	FALSE	FALSE	FALSE	FALSE	FALSE	FALSE	FALSE
orfmeanFEWin95	3679	0.0890635	0.00364869	0.129	0.414	0.131588	0.434331	3679	0.0890635	0.00364869	0.137	0.438	0.139104	0.437826	0.000246455	MIC not significant	FALSE	FALSE	FALSE	FALSE	FALSE	FALSE	FALSE	FALSE
orfmeanFEWin96	3679	0.0908579	0.00421046	0.058	0.337	0.0625187	0.335984	3679	0.0908579	0.00421046	0.058	0.319	0.0615385	0.327183	8.19649e-05	MIC not significant	FALSE	FALSE	FALSE	FALSE	FALSE	FALSE	FALSE	FALSE
orfmeanFEWin97	3679	0.0861851	0.00447876	0.395	0.822	0.407454	0.818316	3679	0.0861851	0.00447876	0.41	0.827	0.421562	0.825084	4.85696e-05	MIC not significant	FALSE	FALSE	FALSE	FALSE	FALSE	FALSE	FALSE	FALSE
orfmeanFEWin98	3679	0.0875404	0.00453147	0.268	0.741	0.28004	0.731937	3679	0.0875404	0.00453147	0.241	0.674	0.247844	0.689467	4.38311e-05	MIC not significant	FALSE	FALSE	FALSE	FALSE	FALSE	FALSE	FALSE	FALSE
orfmeanFEWin99	3679	0.0857762	0.00420458	0.437	0.826	0.447915	0.82491	3679	0.0857762	0.00420458	0.443	0.829	0.447018	0.829956	8.29116e-05	MIC not significant	FALSE	FALSE	FALSE	FALSE	FALSE	FALSE	FALSE	FALSE
orfmeanFEWin100	3679	0.089728	0.00490064	0.112	0.519	0.114929	0.533786	3679	0.089728	0.00490064	0.127	0.514	0.117968	0.532439	2.13885e-05	MIC not significant	FALSE	FALSE	FALSE	FALSE	FALSE	FALSE	FALSE	FALSE
orftAIWin1	3682	0.0837082	0.000525404	0.883	0.907	0.873267	0.888436	3682	0.0837082	0.000525404	0.869	0.887	0.87343	0.890911	0.164351	MIC not significant	FALSE	FALSE	FALSE	FALSE	FALSE	FALSE	FALSE	FALSE
orftAIWin2	3682	0.0923328	0.00480833	0.059	0.431	0.057032	0.442212	3682	0.0923328	0.00480833	0.057	0.395	0.0506666	0.427574	2.53923e-05	MIC not significant	FALSE	FALSE	FALSE	FALSE	FALSE	FALSE	FALSE	FALSE
orftAIWin3	3682	0.0884446	0.00309704	0.345	0.718	0.362442	0.71771	3682	0.0884446	0.00309704	0.338	0.709	0.367041	0.712304	0.000729219	MIC not significant	FALSE	FALSE	FALSE	FALSE	FALSE	FALSE	FALSE	FALSE
orftAIWin4	3682	0.0872822	0.0011422	0.472	0.58	0.487717	0.598797	3682	0.0872822	0.0011422	0.467	0.584	0.497812	0.609925	0.0403023	MIC not significant	FALSE	FALSE	FALSE	FALSE	FALSE	FALSE	FALSE	FALSE
orftAIWin5	3682	0.0894773	0.00434973	0.252	0.756	0.250011	0.742513	3682	0.0894773	0.00434973	0.237	0.732	0.247181	0.734472	6.20272e-05	MIC not significant	FALSE	FALSE	FALSE	FALSE	FALSE	FALSE	FALSE	FALSE
orftAIWin6	3682	0.0862115	0.00254593	0.606	0.858	0.629689	0.85386	3682	0.0862115	0.00254593	0.621	0.851	0.627805	0.851887	0.002194	MIC not significant	FALSE	FALSE	FALSE	FALSE	FALSE	FALSE	FALSE	FALSE
orftAIWin7	3682	0.0851602	0.00261343	0.728	0.941	0.736595	0.917626	3682	0.0851602	0.00261343	0.742	0.923	0.744831	0.92021	0.00191561	MIC not significant	FALSE	FALSE	FALSE	FALSE	FALSE	FALSE	FALSE	FALSE
orftAIWin8	3682	0.087676	0.00429063	0.436	0.897	0.464718	0.883373	3682	0.087676	0.00429063	0.446	0.891	0.467251	0.885746	6.96131e-05	MIC not significant	FALSE	FALSE	FALSE	FALSE	FALSE	FALSE	FALSE	FALSE
orftAIWin9	3682	0.0833832	0.00253795	0.92	0.989	0.906291	0.979189	3682	0.0833832	0.00253795	0.909	0.987	0.897501	0.975977	0.00222955	MIC not significant	FALSE	FALSE	FALSE	FALSE	FALSE	FALSE	FALSE	FALSE
orftAIWin10	3682	0.0905995	0.00316537	0.137	0.426	0.138405	0.436605	3682	0.0905995	0.00316537	0.151	0.445	0.140903	0.452048	0.000636717	MIC not significant	FALSE	FALSE	FALSE	FALSE	FALSE	FALSE	FALSE	FALSE
orftAIWin11	3682	0.0899573	0.00461282	0.19	0.707	0.19401	0.716113	3682	0.0899573	0.00461282	0.189	0.698	0.197495	0.707571	3.71415e-05	MIC not significant	FALSE	FALSE	FALSE	FALSE	FALSE	FALSE	FALSE	FALSE
orftAIWin12	3682	0.0844371	0.00323597	0.824	0.972	0.818138	0.969218	3682	0.0844371	0.00323597	0.82	0.981	0.830643	0.971905	0.00055354	MIC not significant	FALSE	FALSE	FALSE	FALSE	FALSE	FALSE	FALSE	FALSE
orftAIWin13	3682	0.09106	0.00348623	0.134	0.388	0.115371	0.42849	3682	0.09106	0.00348623	0.123	0.417	0.115741	0.429885	0.000337482	MIC not significant	FALSE	FALSE	FALSE	FALSE	FALSE	FALSE	FALSE	FALSE
orftAIWin14	3682	0.0892041	0.00461528	0.269	0.79	0.289557	0.79522	3682	0.0892041	0.00461528	0.264	0.797	0.278247	0.778367	3.69639e-05	MIC not significant	FALSE	FALSE	FALSE	FALSE	FALSE	FALSE	FALSE	FALSE
orftAIWin15	3682	0.090541	0.00340452	0.148	0.473	0.147371	0.493484	3682	0.090541	0.00340452	0.136	0.458	0.13931	0.482837	0.000396565	MIC not significant	FALSE	FALSE	FALSE	FALSE	FALSE	FALSE	FALSE	FALSE
orftAIWin16	3682	0.0874079	0.00451127	0.489	0.917	0.498543	0.908236	3682	0.0874079	0.00451127	0.444	0.91	0.468871	0.904871	4.52648e-05	MIC not significant	FALSE	FALSE	FALSE	FALSE	FALSE	FALSE	FALSE	FALSE
orftAIWin17	3682	0.0877025	0.00536519	0.416	0.937	0.418948	0.931774	3682	0.0877025	0.00536519	0.418	0.938	0.42884	0.928469	8.62361e-06	MIC not significant	FALSE	FALSE	FALSE	FALSE	FALSE	FALSE	FALSE	FALSE
orftAIWin18	3682	0.0838344	0.00265137	0.877	0.982	0.870856	0.972622	3682	0.0838344	0.00265137	0.869	0.978	0.861063	0.968498	0.0017751	MIC not significant	FALSE	FALSE	FALSE	FALSE	FALSE	FALSE	FALSE	FALSE
orftAIWin19	3682	0.0831775	0.00454423	0.916	0.999	0.91366	0.996952	3682	0.0831775	0.00454423	0.915713	0.998871	0.907401	0.996482	4.24497e-05	MIC not significant	FALSE	FALSE	FALSE	FALSE	FALSE	FALSE	FALSE	FALSE
orftAIWin20	3682	0.0898527	0.00404737	0.193	0.621	0.207398	0.6465	3682	0.0898527	0.00404737	0.197	0.644	0.21211	0.664011	0.000112017	MIC not significant	FALSE	FALSE	FALSE	FALSE	FALSE	FALSE	FALSE	FALSE
orftAIWin21	3682	0.0885929	0.00297311	0.333	0.681	0.349658	0.687867	3682	0.0885929	0.00297311	0.332	0.673	0.34588	0.676206	0.000933081	MIC not significant	FALSE	FALSE	FALSE	FALSE	FALSE	FALSE	FALSE	FALSE
orftAIWin22	3682	0.0897343	0.0055942	0.223	0.816	0.205526	0.826456	3682	0.0897343	0.0055942	0.217	0.81	0.21517	0.818411	5.53785e-06	MIC not significant	FALSE	FALSE	FALSE	FALSE	FALSE	FALSE	FALSE	FALSE
orftAIWin23	3682	0.08822	0.00480369	0.395	0.891	0.396139	0.892105	3682	0.08822	0.00480369	0.368	0.898	0.400976	0.886599	2.56222e-05	MIC not significant	FALSE	FALSE	FALSE	FALSE	FALSE	FALSE	FALSE	FALSE
orftAIWin24	3682	0.0854775	0.00168744	0.71	0.853	0.711537	0.843153	3682	0.0854775	0.00168744	0.725	0.854	0.735582	0.86172	0.0126731	MIC not significant	FALSE	FALSE	FALSE	FALSE	FALSE	FALSE	FALSE	FALSE
orftAIWin25	3682	0.0923688	0.00843084	0.072	0.844	0.0572583	0.845702	3682	0.0923688	0.00843084	0.072	0.833	0.0617661	0.842013	2.38496e-08	MIC not significant	FALSE	FALSE	FALSE	FALSE	FALSE	FALSE	FALSE	FALSE
orftAIWin26	3682	0.0921189	0.00392186	0.08	0.339	0.0652642	0.367267	3682	0.0921189	0.00392186	0.062	0.324	0.0535842	0.33786	0.000143254	MIC not significant	FALSE	FALSE	FALSE	FALSE	FALSE	FALSE	FALSE	FALSE
orftAIWin27	3682	0.0871833	0.00167274	0.499	0.687	0.518546	0.690083	3682	0.0871833	0.00167274	0.498	0.678	0.518937	0.689764	0.013067	MIC not significant	FALSE	FALSE	FALSE	FALSE	FALSE	FALSE	FALSE	FALSE
orftAIWin28	3682	0.0977856	0.00944921	0.003	0.322	0.000428415	0.340168	3682	0.0977856	0.00944921	0.00146392	0.324268	0.000399172	0.339668	3.41129e-09	non-significant monotone/non-monotone	TRUE	TRUE	FALSE	FALSE	TRUE	TRUE	FALSE	FALSE
orftAIWin29	3682	0.0904844	0.00297164	0.133	0.379	0.14035	0.419868	3682	0.0904844	0.00297164	0.135	0.42	0.146567	0.435427	0.000935819	MIC not significant	FALSE	FALSE	FALSE	FALSE	FALSE	FALSE	FALSE	FALSE
orftAIWin30	3682	0.0813556	0.00172892	0.982	0.998	0.973971	0.991884	3682	0.0813556	0.00172892	0.977	0.993	0.966084	0.988558	0.0116258	MIC not significant	FALSE	FALSE	FALSE	FALSE	FALSE	FALSE	FALSE	FALSE
orftAIWin31	3682	0.0995094	0.0097723	0.000326733	0.190366	4.77851e-05	0.194826	3682	0.0995094	0.0097723	0.000354167	0.188156	4.37098e-05	0.192166	1.84203e-09	non-significant monotone/non-monotone	TRUE	TRUE	FALSE	FALSE	TRUE	TRUE	FALSE	FALSE
orftAIWin32	3682	0.0850323	0.00257626	0.757	0.94	0.768469	0.931412	3682	0.0850323	0.00257626	0.754	0.934	0.761443	0.925414	0.00206416	MIC not significant	FALSE	FALSE	FALSE	FALSE	FALSE	FALSE	FALSE	FALSE
orftAIWin33	3682	0.0843781	0.000834184	0.821	0.858	0.820359	0.863099	3682	0.0843781	0.000834184	0.818	0.871	0.822354	0.865041	0.0797171	MIC not significant	FALSE	FALSE	FALSE	FALSE	FALSE	FALSE	FALSE	FALSE
orftAIWin34	3682	0.09227	0.0117548	0.062	0.989	0.0552305	0.981691	3682	0.09227	0.0117548	0.066	0.988	0.0609553	0.981438	4.22224e-11	MIC not significant	FALSE	FALSE	FALSE	FALSE	FALSE	FALSE	FALSE	FALSE
orftAIWin35	3682	0.0871448	0.00304583	0.516	0.829	0.528666	0.834308	3682	0.0871448	0.00304583	0.503	0.822	0.512996	0.825507	0.000807366	MIC not significant	FALSE	FALSE	FALSE	FALSE	FALSE	FALSE	FALSE	FALSE
orftAIWin36	3682	0.0812445	0.000282109	0.978	0.979	0.972971	0.973438	3682	0.0812445	0.000282109	0.983	0.985	0.973605	0.974031	0.308248	MIC not significant	FALSE	FALSE	FALSE	FALSE	FALSE	FALSE	FALSE	FALSE
orftAIWin37	3682	0.0895815	0.0123119	0.258	1	0.244275	0.999222	3682	0.0895815	0.0123119	0.227723	0.999832	0.235323	0.999136	1.46314e-11	MIC not significant	FALSE	FALSE	FALSE	FALSE	FALSE	FALSE	FALSE	FALSE
orftAIWin38	3682	0.0860486	0.00533477	0.628	0.983	0.647212	0.976544	3682	0.0860486	0.00533477	0.607	0.993	0.641442	0.979442	9.14664e-06	MIC not significant	FALSE	FALSE	FALSE	FALSE	FALSE	FALSE	FALSE	FALSE
orftAIWin39	3682	0.086393	0.000201334	0.621	0.612	0.630974	0.620959	3682	0.086393	0.000201334	0.598	0.588	0.608135	0.600503	0.389378	MIC not significant	FALSE	FALSE	FALSE	FALSE	FALSE	FALSE	FALSE	FALSE
orftAIWin40	3682	0.0938836	0.0161964	0.026	1	0.0194213	0.998465	3682	0.0938836	0.0161964	0.0251386	0.999624	0.0180293	0.998611	9.0957e-15	Monotone	FALSE	FALSE	FALSE	FALSE	FALSE	TRUE	FALSE	FALSE
orftAIWin41	3682	0.0848421	0.00504823	0.773	0.996	0.783785	0.987363	3682	0.0848421	0.00504823	0.79	0.995	0.785939	0.988735	1.59371e-05	MIC not significant	FALSE	FALSE	FALSE	FALSE	FALSE	FALSE	FALSE	FALSE
orftAIWin42	3682	0.0911219	0.000428682	0.123	0.123	0.114433	0.122532	3682	0.0911219	0.000428682	0.11	0.118	0.111021	0.120771	0.209096	MIC not significant	FALSE	FALSE	FALSE	FALSE	FALSE	FALSE	FALSE	FALSE
orftAIWin43	3682	0.0950386	0.0153776	0.009	0.998	0.00721377	0.991449	3682	0.0950386	0.0153776	0.015	0.993	0.00729933	0.99036	4.31077e-14	Monotone	TRUE	FALSE	FALSE	FALSE	TRUE	TRUE	FALSE	TRUE
orftAIWin44	3682	0.0905614	0.00550861	0.152	0.732	0.142533	0.730088	3682	0.0905614	0.00550861	0.153	0.747	0.15349	0.746509	6.53419e-06	MIC not significant	FALSE	FALSE	FALSE	FALSE	FALSE	FALSE	FALSE	FALSE
orftAIWin45	3682	0.087922	0.000168128	0.41	0.396	0.419026	0.406777	3682	0.087922	0.000168128	0.413	0.403	0.424908	0.413044	0.431539	MIC not significant	FALSE	FALSE	FALSE	FALSE	FALSE	FALSE	FALSE	FALSE
orftAIWin46	3682	0.102417	0.0158404	0	0.538567	6.3952e-07	0.55791	3682	0.102417	0.0158404	0.001	0.54	8.14074e-07	0.566605	1.78909e-14	non-significant monotone/non-monotone	TRUE	TRUE	FALSE	FALSE	TRUE	TRUE	FALSE	FALSE
orftAIWin47	3682	0.0886423	0.00581721	0.325	0.918	0.346812	0.91057	3682	0.0886423	0.00581721	0.326	0.923	0.334278	0.912191	3.59986e-06	MIC not significant	FALSE	FALSE	FALSE	FALSE	FALSE	FALSE	FALSE	FALSE
orftAIWin48	3682	0.0897246	5.62982e-05	0.212	0.194	0.22082	0.201344	3682	0.0897246	5.62982e-05	0.219	0.205	0.223221	0.204357	0.649006	MIC not significant	FALSE	FALSE	FALSE	FALSE	FALSE	FALSE	FALSE	FALSE
orftAIWin49	3682	0.0958302	0.0156772	0.009	0.996	0.00350949	0.986522	3682	0.0958302	0.0156772	0.008	0.99	0.00428315	0.982684	2.43978e-14	Monotone	TRUE	TRUE	FALSE	TRUE	TRUE	TRUE	FALSE	TRUE
orftAIWin50	3682	0.0880432	0.00548047	0.396	0.942	0.40978	0.923174	3682	0.0880432	0.00548047	0.385	0.933	0.41452	0.920601	6.89974e-06	MIC not significant	FALSE	FALSE	FALSE	FALSE	FALSE	FALSE	FALSE	FALSE
orftAIWin51	3682	0.0894833	2.95672e-05	0.258	0.235	0.259027	0.235603	3682	0.0894833	2.95672e-05	0.229	0.212	0.240644	0.216017	0.741521	MIC not significant	FALSE	FALSE	FALSE	FALSE	FALSE	FALSE	FALSE	FALSE
orftAIWin52	3682	0.0985921	0.0194665	0.001	0.997	0.000170442	0.992443	3682	0.0985921	0.0194665	0.00080198	0.997653	0.000151294	0.994336	1.81753e-17	Monotone	TRUE	TRUE	FALSE	TRUE	TRUE	TRUE	FALSE	TRUE
orftAIWin53	3682	0.0871144	0.00629894	0.505	0.986	0.526095	0.978763	3682	0.0871144	0.00629894	0.501	0.982	0.52417	0.975348	1.42232e-06	MIC not significant	FALSE	FALSE	FALSE	FALSE	FALSE	FALSE	FALSE	FALSE
orftAIWin54	3682	0.0861639	4.60302e-07	0.608	0.572	0.632102	0.596059	3682	0.0861639	4.60302e-07	0.647	0.608	0.641765	0.609277	0.967173	MIC not significant	FALSE	FALSE	FALSE	FALSE	FALSE	FALSE	FALSE	FALSE
orftAIWin55	3682	0.100944	0.0178998	0.000138614	0.90598	6.34021e-06	0.899335	3682	0.100944	0.0178998	0.000166667	0.906802	6.64458e-06	0.89957	3.5724e-16	non-significant monotone/non-monotone	TRUE	TRUE	FALSE	FALSE	TRUE	TRUE	FALSE	FALSE
orftAIWin56	3682	0.0914752	0.00607525	0.089	0.692	0.0906176	0.69648	3682	0.0914752	0.00607525	0.087	0.677	0.0847407	0.70267	2.18846e-06	MIC not significant	FALSE	FALSE	FALSE	FALSE	FALSE	FALSE	FALSE	FALSE
orftAIWin57	3682	0.0854948	3.28185e-05	0.714	0.685	0.709123	0.678514	3682	0.0854948	3.28185e-05	0.751	0.723	0.75028	0.722305	0.728214	MIC not significant	FALSE	FALSE	FALSE	FALSE	FALSE	FALSE	FALSE	FALSE
orftAIWin58	3682	0.0969232	0.0169221	0.004	0.992	0.00154215	0.985949	3682	0.0969232	0.0169221	0.002	0.994	0.000892197	0.990032	2.29075e-15	Monotone	TRUE	TRUE	FALSE	TRUE	TRUE	TRUE	FALSE	TRUE
orftAIWin59	3682	0.0881879	0.00745311	0.383	0.988	0.407249	0.980825	3682	0.0881879	0.00745311	0.366	0.989	0.377719	0.978363	1.54962e-07	MIC not significant	FALSE	FALSE	FALSE	FALSE	FALSE	FALSE	FALSE	FALSE
orftAIWin60	3682	0.0841508	3.34995e-05	0.844	0.826	0.843714	0.824895	3682	0.0841508	3.34995e-05	0.845	0.828	0.851108	0.833808	0.725522	MIC not significant	FALSE	FALSE	FALSE	FALSE	FALSE	FALSE	FALSE	FALSE
orftAIWin61	3682	0.0975169	0.0146873	0.00202885	0.91924	0.000569316	0.912079	3682	0.0975169	0.0146873	0.003	0.921	0.000647937	0.914501	1.6006e-13	non-significant monotone/non-monotone	TRUE	TRUE	FALSE	FALSE	TRUE	TRUE	FALSE	FALSE
orftAIWin62	3682	0.0929365	0.00667784	0.044	0.617	0.037346	0.622786	3682	0.0929365	0.00667784	0.044	0.562	0.0356906	0.582244	6.86197e-07	non-significant monotone/non-monotone	FALSE	FALSE	FALSE	FALSE	FALSE	FALSE	FALSE	FALSE
orftAIWin63	3682	0.0860176	0.000105646	0.654	0.63	0.650416	0.632654	3682	0.0860176	0.000105646	0.641	0.623	0.659807	0.641353	0.53296	MIC not significant	FALSE	FALSE	FALSE	FALSE	FALSE	FALSE	FALSE	FALSE
orftAIWin64	3682	0.0925293	0.0124364	0.053	0.994	0.0486495	0.987785	3682	0.0925293	0.0124364	0.062	0.993	0.0483308	0.987628	1.1546e-11	MIC not significant	FALSE	FALSE	FALSE	FALSE	FALSE	FALSE	FALSE	FALSE
orftAIWin65	3682	0.0916492	0.0060263	0.1	0.66	0.0989643	0.684451	3682	0.0916492	0.0060263	0.098	0.671	0.0926803	0.678832	2.40503e-06	MIC not significant	FALSE	FALSE	FALSE	FALSE	FALSE	FALSE	FALSE	FALSE
orftAIWin66	3682	0.0841497	1.65601e-05	0.842	0.82	0.841619	0.821045	3682	0.0841497	1.65601e-05	0.839	0.818	0.845548	0.825984	0.805026	MIC not significant	FALSE	FALSE	FALSE	FALSE	FALSE	FALSE	FALSE	FALSE
orftAIWin67	3682	0.0889353	0.0115029	0.32	0.999	0.323148	0.999172	3682	0.0889353	0.0115029	0.288248	0.999752	0.301273	0.998975	6.81828e-11	MIC not significant	FALSE	FALSE	FALSE	FALSE	FALSE	FALSE	FALSE	FALSE
orftAIWin68	3682	0.0883547	0.00740166	0.382	0.985	0.400211	0.976368	3682	0.0883547	0.00740166	0.34	0.986	0.363738	0.975446	1.71026e-07	MIC not significant	FALSE	FALSE	FALSE	FALSE	FALSE	FALSE	FALSE	FALSE
orftAIWin69	3682	0.0924169	2.49359e-06	0.052	0.046	0.0506057	0.043021	3682	0.0924169	2.49359e-06	0.06	0.055	0.0557116	0.0458374	0.92369	MIC not significant	FALSE	FALSE	FALSE	FALSE	FALSE	FALSE	FALSE	FALSE
orftAIWin70	3682	0.0975458	0.0138805	0.001	0.869	0.000273486	0.860213	3682	0.0975458	0.0138805	0.00191667	0.86375	0.000525775	0.859463	7.41517e-13	non-significant monotone/non-monotone	TRUE	TRUE	FALSE	FALSE	TRUE	TRUE	FALSE	FALSE
orftAIWin71	3682	0.089034	0.0085865	0.277	0.99	0.293516	0.980862	3682	0.089034	0.0085865	0.275	0.992	0.291773	0.984646	1.77123e-08	MIC not significant	FALSE	FALSE	FALSE	FALSE	FALSE	FALSE	FALSE	FALSE
orftAIWin72	3682	0.0927167	8.16443e-06	0.047	0.041	0.0381705	0.0318205	3682	0.0927167	8.16443e-06	0.048	0.04	0.0378721	0.0312822	0.862397	Non-monotone	FALSE	FALSE	FALSE	FALSE	FALSE	FALSE	FALSE	FALSE
orftAIWin73	3682	0.0987706	0.015085	0.001	0.858	0.000134818	0.856987	3682	0.0987706	0.015085	0.001	0.872	0.00021109	0.862703	7.51683e-14	non-significant monotone/non-monotone	TRUE	TRUE	FALSE	FALSE	TRUE	TRUE	FALSE	FALSE
orftAIWin74	3680	0.0909959	0.0070981	0.134	0.848	0.136895	0.851506	3680	0.0909959	0.0070981	0.132	0.861	0.128393	0.848563	3.08404e-07	MIC not significant	FALSE	FALSE	FALSE	FALSE	FALSE	FALSE	FALSE	FALSE
orftAIWin75	3680	0.09365	2.44414e-07	0.03	0.023	0.027944	0.0222003	3680	0.09365	2.44414e-07	0.023	0.021	0.0205251	0.016556	0.976083	Non-monotone	FALSE	FALSE	FALSE	FALSE	FALSE	FALSE	FALSE	FALSE
orftAIWin76	3680	0.096567	0.0149529	0.008	0.972	0.00144266	0.959634	3680	0.096567	0.0149529	0.007	0.971	0.00151935	0.964141	9.81052e-14	Monotone	TRUE	TRUE	FALSE	FALSE	TRUE	TRUE	FALSE	FALSE
orftAIWin77	3680	0.0920089	0.00531944	0.091	0.549	0.0784174	0.564587	3680	0.0920089	0.00531944	0.067	0.533	0.0618595	0.536066	9.4749e-06	MIC not significant	FALSE	FALSE	FALSE	FALSE	FALSE	FALSE	FALSE	FALSE
orftAIWin78	3680	0.0892586	8.74812e-05	0.231	0.216	0.25752	0.240186	3680	0.0892586	8.74812e-05	0.275	0.261	0.283114	0.264122	0.570572	MIC not significant	FALSE	FALSE	FALSE	FALSE	FALSE	FALSE	FALSE	FALSE
orftAIWin79	3680	0.0976601	0.0137685	0.004	0.862	0.000767652	0.854591	3680	0.0976601	0.0137685	0.001	0.85	0.000385972	0.845582	9.30557e-13	non-significant monotone/non-monotone	TRUE	TRUE	FALSE	FALSE	TRUE	TRUE	FALSE	FALSE
orftAIWin80	3680	0.0924918	0.00553528	0.062	0.491	0.0510079	0.508762	3680	0.0924918	0.00553528	0.068	0.526	0.059771	0.543819	6.24191e-06	MIC not significant	FALSE	FALSE	FALSE	FALSE	FALSE	FALSE	FALSE	FALSE
orftAIWin81	3680	0.0842461	0.000252311	0.847	0.844	0.846058	0.845237	3680	0.0842461	0.000252311	0.831	0.837	0.83552	0.835205	0.335385	MIC not significant	FALSE	FALSE	FALSE	FALSE	FALSE	FALSE	FALSE	FALSE
orftAIWin82	3680	0.0982782	0.0152511	0.000909091	0.910626	0.000229939	0.903631	3680	0.0982782	0.0152511	0.004	0.901	0.000249784	0.89607	5.56846e-14	non-significant monotone/non-monotone	TRUE	TRUE	FALSE	FALSE	TRUE	TRUE	FALSE	FALSE
orftAIWin83	3680	0.0886923	0.00435704	0.302	0.806	0.320917	0.808013	3680	0.0886923	0.00435704	0.329	0.796	0.334416	0.798295	6.14308e-05	MIC not significant	FALSE	FALSE	FALSE	FALSE	FALSE	FALSE	FALSE	FALSE
orftAIWin84	3680	0.092771	0.000274771	0.047	0.05	0.0400086	0.0396221	3680	0.092771	0.000274771	0.049	0.051	0.0432708	0.0444998	0.314757	non-significant monotone/non-monotone	FALSE	FALSE	FALSE	FALSE	FALSE	FALSE	FALSE	FALSE
orftAIWin85	3680	0.0985076	0.0142953	0.002	0.815	0.00017926	0.817438	3680	0.0985076	0.0142953	0.000891089	0.822485	0.000188341	0.820024	3.42105e-13	non-significant monotone/non-monotone	TRUE	TRUE	FALSE	FALSE	TRUE	TRUE	FALSE	FALSE
orftAIWin86	3680	0.0861032	0.00438476	0.655	0.965	0.660035	0.957337	3680	0.0861032	0.00438476	0.662	0.973	0.674569	0.962547	5.81983e-05	MIC not significant	FALSE	FALSE	FALSE	FALSE	FALSE	FALSE	FALSE	FALSE
orftAIWin87	3680	0.0863869	0.000546143	0.614	0.65	0.637484	0.669184	3680	0.0863869	0.000546143	0.617	0.652	0.632301	0.666351	0.156369	MIC not significant	FALSE	FALSE	FALSE	FALSE	FALSE	FALSE	FALSE	FALSE
orftAIWin88	3680	0.0949985	0.0158812	0.009	0.995	0.00769238	0.99366	3680	0.0949985	0.0158812	0.009	0.999	0.00566875	0.996367	1.68289e-14	Monotone	TRUE	TRUE	FALSE	TRUE	TRUE	TRUE	FALSE	TRUE
orftAIWin89	3680	0.0899384	0.00544963	0.197	0.795	0.207309	0.798368	3680	0.0899384	0.00544963	0.2	0.8	0.208622	0.79712	7.36574e-06	MIC not significant	FALSE	FALSE	FALSE	FALSE	FALSE	FALSE	FALSE	FALSE
orftAIWin90	3680	0.0868417	0.000573813	0.587	0.615	0.580165	0.6164	3680	0.0868417	0.000573813	0.54	0.59	0.560667	0.598778	0.146263	MIC not significant	FALSE	FALSE	FALSE	FALSE	FALSE	FALSE	FALSE	FALSE
orftAIWin91	3680	0.0882424	0.0140196	0.378	1	0.386287	0.999989	3680	0.0882424	0.0140196	0.37201	1	0.388257	0.999981	5.77498e-13	MIC not significant	FALSE	FALSE	FALSE	FALSE	FALSE	FALSE	FALSE	FALSE
orftAIWin92	3680	0.0873887	0.00487398	0.481	0.939	0.502845	0.921763	3680	0.0873887	0.00487398	0.484	0.925	0.496155	0.916052	2.24663e-05	MIC not significant	FALSE	FALSE	FALSE	FALSE	FALSE	FALSE	FALSE	FALSE
orftAIWin93	3680	0.083841	0.000398893	0.884	0.889	0.870388	0.878815	3680	0.083841	0.000398893	0.869	0.875	0.864706	0.871909	0.225784	MIC not significant	FALSE	FALSE	FALSE	FALSE	FALSE	FALSE	FALSE	FALSE
orftAIWin94	3680	0.0924147	0.0146829	0.059	1	0.0558559	0.997916	3680	0.0924147	0.0146829	0.0608515	0.999693	0.0535643	0.998524	1.63831e-13	MIC not significant	FALSE	FALSE	FALSE	FALSE	FALSE	FALSE	FALSE	FALSE
orftAIWin95	3679	0.0916244	0.00396674	0.098	0.408	0.085534	0.433969	3679	0.0916244	0.00396674	0.085	0.406	0.0810254	0.425818	0.00013202	MIC not significant	FALSE	FALSE	FALSE	FALSE	FALSE	FALSE	FALSE	FALSE
orftAIWin96	3679	0.090098	0.000224097	0.175	0.172	0.186077	0.181134	3679	0.090098	0.000224097	0.2	0.19	0.194124	0.186702	0.364017	MIC not significant	FALSE	FALSE	FALSE	FALSE	FALSE	FALSE	FALSE	FALSE
orftAIWin97	3679	0.0928182	0.0143861	0.052	0.999	0.0366785	0.996935	3679	0.0928182	0.0143861	0.0498119	0.999109	0.0418753	0.997101	2.90031e-13	MIC not significant	FALSE	FALSE	FALSE	FALSE	FALSE	FALSE	FALSE	FALSE
orftAIWin98	3679	0.0870823	0.0035102	0.52	0.873	0.529256	0.871775	3679	0.0870823	0.0035102	0.502	0.896	0.521489	0.872226	0.000323709	MIC not significant	FALSE	FALSE	FALSE	FALSE	FALSE	FALSE	FALSE	FALSE
orftAIWin99	3679	0.0874166	0.000360062	0.486	0.493	0.503005	0.51494	3679	0.0874166	0.000360062	0.458	0.462	0.478118	0.49209	0.249874	MIC not significant	FALSE	FALSE	FALSE	FALSE	FALSE	FALSE	FALSE	FALSE
orftAIWin100	3679	0.0970574	0.0150358	0.001	0.953	0.00124414	0.95401	3679	0.0970574	0.0150358	0.005	0.972	0.0010743	0.953251	8.44692e-14	Monotone	TRUE	TRUE	FALSE	FALSE	TRUE	TRUE	FALSE	FALSE
codonTTT	3682	0.116488	0.0388062	0	0.993376	7.15368e-20	0.987329	3663	0.113566	0.0351978	0	0.99095	3.47747e-16	0.983719	2.27994e-30	Monotone	TRUE	TRUE	FALSE	TRUE	TRUE	TRUE	FALSE	TRUE
codonTTC	3682	0.0934152	0.0076441	0.011	0.416	0.0110778	0.419754	3641	0.0962437	0.0112623	0.007	0.586	0.00148735	0.59081	1.367e-10	non-significant monotone/non-monotone	TRUE	TRUE	FALSE	FALSE	TRUE	TRUE	FALSE	FALSE
codonTTA	3682	0.146039	0.0662448	0	0.95297	4.08031e-69	0.942975	3675	0.144339	0.0693078	0	0.99976	6.26065e-65	0.998639	2.56921e-59	Monotone	TRUE	TRUE	FALSE	TRUE	TRUE	TRUE	FALSE	TRUE
codonTTG	3682	0.175433	0.148858	0	1	8.97704e-151	1	3615	0.163817	0.129928	0	1	8.30607e-108	1	2.35338e-111	Monotone	TRUE	TRUE	FALSE	TRUE	TRUE	TRUE	FALSE	TRUE
codonTCT	3682	0.151418	0.0700443	0	0.849465	3.0258e-76	0.849184	3522	0.118779	0.0395256	0	0.990287	1.35115e-17	0.984357	1.00519e-32	Monotone	TRUE	TRUE	FALSE	TRUE	TRUE	TRUE	FALSE	TRUE
codonTCC	3682	0.129268	0.0606205	0	1	1.36628e-34	0.999997	3517	0.132136	0.0856389	0	1	9.70119e-34	1	2.11712e-70	Monotone	TRUE	TRUE	FALSE	TRUE	TRUE	TRUE	FALSE	TRUE
codonTCA	3682	0.14894	0.0733862	0	0.997873	3.56193e-69	0.995482	3209	0.10059	0.0125051	0.004	0.585	0.0021145	0.605247	2.12267e-10	non-significant monotone/non-monotone	TRUE	TRUE	FALSE	FALSE	TRUE	TRUE	FALSE	FALSE
codonTCG	3682	0.11135	0.0134196	0	0.000524272	1.51771e-13	0.000155857	3622	0.109122	0.0191464	0	0.152297	1.70829e-10	0.151312	6.01388e-17	non-significant monotone/non-monotone	TRUE	TRUE	FALSE	FALSE	TRUE	TRUE	FALSE	FALSE
codonTAT	3682	0.097977	0.00493217	0.001	0.011	0.000128008	0.00989021	3622	0.0983662	0.0095187	0.00137624	0.233881	0.000489927	0.239531	4.01186e-09	non-significant monotone/non-monotone	TRUE	TRUE	FALSE	FALSE	TRUE	TRUE	FALSE	FALSE
codonTAC	3682	0.147249	0.066642	0	0.893178	1.03381e-66	0.890029	3328	0.115414	0.0247102	0	0.22701	4.04985e-13	0.232544	7.39297e-20	non-significant monotone/non-monotone	TRUE	TRUE	FALSE	FALSE	TRUE	TRUE	FALSE	FALSE
codonTAA	3682	0.163361	0.105171	0	1	1.51404e-103	1	3321	0.124128	0.0465063	0	0.99898	4.62512e-21	0.99689	3.04055e-36	Monotone	TRUE	TRUE	FALSE	TRUE	TRUE	TRUE	FALSE	TRUE
codonTAG	3682	0.145208	0.0843726	0	1	7.0691e-63	1	3475	0.11704	0.0442998	0	1	5.97897e-16	0.999946	4.30815e-36	Monotone	TRUE	TRUE	FALSE	TRUE	TRUE	TRUE	FALSE	TRUE
codonTGT	3682	0.242302	0.268282	0	1	0	1	3426	0.205942	0.198027	0	1	3.52067e-224	1	2.55413e-166	Monotone	TRUE	TRUE	FALSE	TRUE	TRUE	TRUE	FALSE	TRUE
codonTGC	3682	0.12628	0.0333205	0	0.0183168	5.50782e-31	0.0132973	3597	0.123192	0.0473053	0	0.999703	2.01632e-23	0.998609	8.98683e-40	Monotone	TRUE	TRUE	FALSE	TRUE	TRUE	TRUE	FALSE	TRUE
codonTGA	3682	0.094573	0.000416652	0.008	0.01	0.00513	0.00577744	3682	0.094573	0.000416652	0.011	0.009	0.00484702	0.00536259	0.215604	Non-monotone	TRUE	TRUE	FALSE	FALSE	TRUE	TRUE	FALSE	FALSE
codonTGG	3682	0.0988013	0.00297167	0.00029703	0.00278218	7.04351e-05	0.00118702	3646	0.0947165	0.00149249	0.011	0.026	0.00885194	0.0212467	0.0196586	Non-monotone	TRUE	TRUE	FALSE	FALSE	TRUE	TRUE	FALSE	FALSE
codonCTT	3682	0.106183	0.0124664	9.80392e-06	0.0125098	1.66628e-09	0.00730933	3660	0.105585	0.0145712	0	0.06757	9.69376e-09	0.0605632	2.35182e-13	non-significant monotone/non-monotone	TRUE	TRUE	FALSE	FALSE	TRUE	TRUE	FALSE	FALSE
codonCTC	3682	0.108742	0.0012078	0	0	4.81027e-11	2.51806e-10	3287	0.106757	0.0239254	3.9604e-05	0.944396	3.22314e-06	0.937144	4.72926e-19	non-significant monotone/non-monotone	TRUE	TRUE	FALSE	FALSE	TRUE	TRUE	FALSE	FALSE
codonCTA	3682	0.13127	0.0271768	0	0	4.51874e-38	5.03651e-08	3414	0.0979457	0.00285451	0.005	0.018	0.00259744	0.0166658	0.0017912	Non-monotone	TRUE	TRUE	FALSE	FALSE	TRUE	TRUE	FALSE	FALSE
codonCTG	3682	0.111752	0.0441302	0	1	8.5498e-14	0.999999	3488	0.101923	0.0200639	0.000267327	0.911663	3.0959e-05	0.906384	4.27928e-17	non-significant monotone/non-monotone	TRUE	TRUE	FALSE	FALSE	TRUE	TRUE	FALSE	FALSE
codonCCT	3682	0.144786	0.0690388	0	0.998485	3.51302e-63	0.995674	3582	0.145638	0.0895353	0	1	3.45967e-61	1	5.35401e-75	Monotone	TRUE	TRUE	FALSE	TRUE	TRUE	TRUE	FALSE	TRUE
codonCCC	3682	0.117653	0.0142307	0	0	2.25784e-19	1.84551e-07	3139	0.0962299	0.00207169	0.067	0.141	0.0616754	0.138197	0.0107597	MIC not significant	TRUE	FALSE	FALSE	FALSE	TRUE	FALSE	FALSE	FALSE
codonCCA	3682	0.133706	0.076603	0	1	9.21146e-41	1	2819	0.0970053	0.00171841	0.179	0.274	0.172686	0.266638	0.0277413	MIC not significant	TRUE	FALSE	FALSE	FALSE	TRUE	FALSE	FALSE	FALSE
codonCCG	3682	0.102245	1.01475e-06	0	0	1.22326e-06	8.32322e-07	3499	0.0911044	0.00457482	0.131	0.505	0.134476	0.520423	6.2262e-05	MIC not significant	TRUE	FALSE	FALSE	FALSE	TRUE	FALSE	FALSE	FALSE
codonCAT	3682	0.23091	0.207333	0	1	0	1	2115	0.117339	0.0209087	0.004	0.888	0.00257155	0.884257	2.37056e-11	non-significant monotone/non-monotone	TRUE	TRUE	FALSE	FALSE	TRUE	TRUE	FALSE	FALSE
codonCAC	3682	0.112272	0.0293741	0	0.71067	8.01179e-14	0.716762	2206	0.11114	0.0103221	0.017	0.402	0.0134613	0.431827	1.73971e-06	non-significant monotone/non-monotone	TRUE	FALSE	FALSE	FALSE	TRUE	TRUE	FALSE	FALSE
codonCAA	3682	0.189867	0.119816	0	1	2.12485e-181	0.999978	1655	0.121734	0.000530708	0.036	0.033	0.0232716	0.0233744	0.348962	Non-monotone	TRUE	FALSE	FALSE	FALSE	TRUE	FALSE	FALSE	FALSE
codonCAG	3682	0.115212	0.00950884	0	0	9.46133e-17	6.27477e-09	3130	0.118663	0.0598291	0	1	1.00128e-12	1	7.22893e-44	Monotone	TRUE	TRUE	FALSE	TRUE	TRUE	TRUE	FALSE	TRUE
codonCGT	3682	0.105157	0.0367476	0	1	1.87577e-08	0.999998	3531	0.0989889	0.0200066	0.001	0.99	0.000671045	0.985746	3.05461e-17	Monotone	TRUE	TRUE	FALSE	TRUE	TRUE	TRUE	FALSE	TRUE
codonCGC	3682	0.138134	0.0704315	0	1	3.98841e-48	0.999999	2892	0.0953852	0.00302089	0.247	0.47	0.253305	0.485946	0.00310953	MIC not significant	TRUE	FALSE	FALSE	FALSE	TRUE	FALSE	FALSE	FALSE
codonCGA	3682	0.133416	0.0548684	0	0.971228	5.69014e-41	0.964102	3384	0.0993535	0.0141355	0.002	0.741	0.00178352	0.746344	3.9679e-12	non-significant monotone/non-monotone	TRUE	TRUE	FALSE	FALSE	TRUE	TRUE	FALSE	FALSE
codonCGG	3682	0.150135	0.112914	0	1	5.66003e-73	1	3419	0.122323	0.0625744	0	1	7.41e-21	1	6.15244e-50	Monotone	TRUE	TRUE	FALSE	TRUE	TRUE	TRUE	FALSE	TRUE
codonATT	3682	0.101105	0.00999695	4.9505e-05	0.0534455	2.76631e-06	0.0451706	3670	0.10015	0.0117546	9.375e-05	0.199948	1.34765e-05	0.204914	4.54174e-11	non-significant monotone/non-monotone	TRUE	TRUE	FALSE	FALSE	TRUE	TRUE	FALSE	FALSE
codonATC	3682	0.112836	0.0188297	0	0.00987255	4.92001e-15	0.00609211	3617	0.107733	0.0291356	0	0.99187	2.06681e-09	0.985682	4.74084e-25	Monotone	TRUE	TRUE	FALSE	TRUE	TRUE	TRUE	FALSE	TRUE
codonATA	3682	0.105141	0.0108216	0	0.00771287	1.09484e-08	0.00457425	3564	0.0928338	0.00181607	0.045	0.116	0.0441765	0.102215	0.0109476	non-significant monotone/non-monotone	TRUE	FALSE	FALSE	FALSE	TRUE	FALSE	FALSE	FALSE
codonATG	3682	0.105863	0.0234196	0	0.788059	2.10124e-09	0.793097	3652	0.10495	0.0194753	0	0.5278	2.80047e-08	0.54748	2.4103e-17	non-significant monotone/non-monotone	TRUE	TRUE	FALSE	FALSE	TRUE	TRUE	FALSE	FALSE
codonACT	3682	0.112592	0.00845424	0	0	1.38776e-14	4.99643e-08	3549	0.0966359	0.00106747	0.002	0.012	0.00343723	0.00635547	0.0516272	Non-monotone	TRUE	TRUE	FALSE	FALSE	TRUE	TRUE	FALSE	FALSE
codonACC	3682	0.180241	0.147004	0	1	1.95379e-156	1	3523	0.184796	0.191015	0	1	1.44873e-154	1	2.61174e-164	Monotone	TRUE	TRUE	FALSE	TRUE	TRUE	TRUE	FALSE	TRUE
codonACA	3682	0.1079	0.011679	0	0.00207921	2.22089e-10	0.000991095	3124	0.0970067	0.00547743	0.059	0.363	0.0508596	0.366003	3.46358e-05	MIC not significant	TRUE	FALSE	FALSE	FALSE	TRUE	FALSE	FALSE	FALSE
codonACG	3682	0.197842	0.160395	0	1	5.50504e-226	1	3616	0.200389	0.182683	0	1	4.79216e-226	1	1.51915e-160	Monotone	TRUE	TRUE	FALSE	TRUE	TRUE	TRUE	FALSE	TRUE
codonAAT	3682	0.136027	0.072516	0	1	2.10312e-45	1	3401	0.103615	0.0260589	8.91089e-05	0.998663	1.33274e-05	0.995848	2.72241e-21	Monotone	TRUE	TRUE	FALSE	TRUE	TRUE	TRUE	FALSE	TRUE
codonAAC	3682	0.105359	0.00252116	0	9.90099e-06	1.22269e-08	3.66565e-07	3447	0.0970761	0.0174101	0.012	0.992	0.00714272	0.985297	7.36751e-15	Monotone	TRUE	TRUE	FALSE	TRUE	TRUE	TRUE	FALSE	TRUE
codonAAA	3682	0.10441	0.0279815	0	0.994733	6.81121e-08	0.990827	3137	0.0861025	3.23971e-05	0.85	0.832	0.848228	0.831083	0.749977	MIC not significant	TRUE	FALSE	FALSE	FALSE	TRUE	FALSE	FALSE	FALSE
codonAAG	3682	0.174627	0.126705	0	1	1.98616e-146	1	3626	0.17907	0.141469	0	1	9.15104e-154	1	3.25005e-122	Monotone	TRUE	TRUE	FALSE	TRUE	TRUE	TRUE	FALSE	TRUE
codonAGT	3682	0.151991	0.0768046	0	0.998871	1.2127e-76	0.996862	3426	0.111372	0.0319857	0	0.994396	6.74595e-10	0.989449	5.10519e-26	Monotone	TRUE	TRUE	FALSE	TRUE	TRUE	TRUE	FALSE	TRUE
codonAGC	3682	0.164929	0.0894047	0	0.998406	3.05216e-109	0.996019	3510	0.165031	0.133894	0	1	4.70001e-97	1	1.16045e-111	Monotone	TRUE	TRUE	FALSE	TRUE	TRUE	TRUE	FALSE	TRUE
codonAGA	3682	0.10228	0.00453797	0	0.000633663	1.16422e-06	0.000200539	3457	0.0896811	0.000823199	0.31	0.358	0.328555	0.380157	0.0916635	MIC not significant	TRUE	FALSE	FALSE	FALSE	TRUE	FALSE	FALSE	FALSE
codonAGG	3682	0.119453	0.0316403	0	0.219108	2.01987e-22	0.223418	3627	0.116602	0.0400396	0	0.99896	1.36518e-17	0.996758	4.49059e-34	Monotone	TRUE	TRUE	FALSE	TRUE	TRUE	TRUE	FALSE	TRUE
codonGTT	3682	0.10362	0.016461	9.90099e-06	0.268396	2.37986e-07	0.274801	1762	0.174812	0.10572	0	1	3.03809e-29	1	1.15292e-44	Monotone	TRUE	TRUE	FALSE	TRUE	TRUE	TRUE	FALSE	TRUE
codonGTC	3682	0.109577	0.0193312	0	0.0793762	5.24916e-12	0.0729233	3580	0.109589	0.0314673	0	0.99153	6.35623e-11	0.985463	1.0739e-26	Monotone	TRUE	TRUE	FALSE	TRUE	TRUE	TRUE	FALSE	TRUE
codonGTA	3682	0.0887153	8.00033e-06	0.082	0.073	0.0735269	0.062903	834	0.221617	0.119376	0	1	3.30542e-20	0.999927	8.5569e-25	MIC not significant	FALSE	TRUE	FALSE	FALSE	FALSE	TRUE	FALSE	FALSE
codonGTG	3682	0.142344	0.0754276	0	1	5.62493e-58	1	3535	0.117845	0.0493494	0	1	1.61439e-17	1	8.97153e-41	Monotone	TRUE	TRUE	FALSE	TRUE	TRUE	TRUE	FALSE	TRUE
codonGCT	3682	0.158166	0.119847	0	1	2.08666e-93	1	3514	0.143725	0.0884492	0	1	6.92534e-53	1	1.0708e-72	Monotone	TRUE	TRUE	FALSE	TRUE	TRUE	TRUE	FALSE	TRUE
codonGCC	3682	0.104598	0.0184746	0	0.367356	3.95916e-08	0.380061	3515	0.112709	0.0369854	0	0.99987	6.66353e-12	0.999159	1.23883e-30	Monotone	TRUE	TRUE	FALSE	TRUE	TRUE	TRUE	FALSE	TRUE
codonGCA	3682	0.128904	0.0664202	0	1	1.03307e-33	1	3191	0.103862	0.0122399	0.001	0.295	0.000146405	0.316641	3.69497e-10	non-significant monotone/non-monotone	TRUE	TRUE	FALSE	FALSE	TRUE	TRUE	FALSE	FALSE
codonGCG	3682	0.100714	0.0034897	8.91089e-05	0.000910891	7.34031e-06	0.000307536	3623	0.0972832	0.00639537	0.00353465	0.10396	0.00141758	0.0998558	1.43828e-06	non-significant monotone/non-monotone	TRUE	TRUE	FALSE	FALSE	TRUE	TRUE	FALSE	FALSE
codonGAT	3682	0.0897673	1.5643e-05	0.069	0.057	0.0577233	0.0498475	1086	0.215773	0.129721	0	1	2.08391e-29	1	1.31869e-34	MIC not significant	FALSE	TRUE	FALSE	FALSE	FALSE	TRUE	FALSE	FALSE
codonGAC	3682	0.133078	0.0796557	0	1	6.81626e-40	1	2751	0.0936555	0.00659294	0.484	0.934	0.513483	0.927035	2.00906e-05	MIC not significant	TRUE	FALSE	FALSE	FALSE	TRUE	FALSE	FALSE	FALSE
codonGAA	3682	0.100803	0.00963883	9.90099e-05	0.0504851	8.18169e-06	0.0441966	3360	0.0963746	7.49314e-05	0.024	0.025	0.0170778	0.0145154	0.615956	Non-monotone	TRUE	FALSE	FALSE	FALSE	TRUE	TRUE	FALSE	FALSE
codonGAG	3682	0.105881	0.019516	0	0.344126	6.00219e-09	0.35439	3146	0.0901432	3.09908e-05	0.47	0.454	0.498075	0.471087	0.754947	MIC not significant	TRUE	FALSE	FALSE	FALSE	TRUE	FALSE	FALSE	FALSE
codonGGT	3682	0.11976	0.0575344	0	1	6.22447e-23	1	3617	0.11641	0.049143	0	1	4.31602e-17	1	1.65235e-41	Monotone	TRUE	TRUE	FALSE	TRUE	TRUE	TRUE	FALSE	TRUE
codonGGC	3682	0.106471	0.0133764	0	0.0170594	1.45867e-09	0.0122552	3608	0.113881	0.0221443	0	0.0821188	3.41409e-14	0.0767207	2.57631e-19	non-significant monotone/non-monotone	TRUE	TRUE	FALSE	FALSE	TRUE	TRUE	FALSE	FALSE
codonGGA	3682	0.119655	0.026169	0	0.0128713	5.73797e-23	0.00856916	3654	0.119009	0.0318142	0	0.324079	3.62586e-21	0.337195	1.68431e-27	non-significant monotone/non-monotone	TRUE	TRUE	FALSE	FALSE	TRUE	TRUE	FALSE	FALSE
codonGGG	3682	0.139629	0.0855175	0	1	4.57816e-54	1	3605	0.13344	0.0714477	0	1	3.83495e-39	1	4.99079e-60	Monotone	TRUE	TRUE	FALSE	TRUE	TRUE	TRUE	FALSE	TRUE
pcodonTTTTTT	3682	0.118317	0.0264845	0	0.0238067	1.01886e-20	0.0193788	1241	0.144238	0.0255475	0.002	0.551	0.000459749	0.571135	1.50118e-08	non-significant monotone/non-monotone	TRUE	TRUE	FALSE	FALSE	TRUE	TRUE	FALSE	FALSE
pcodonTTTTTC	3682	0.091715	0.0133272	0.011	0.878	0.00867231	0.87723	776	0.154484	0.0174219	0.125	0.692	0.119793	0.710127	0.000226834	MIC not significant	TRUE	FALSE	FALSE	FALSE	TRUE	FALSE	FALSE	FALSE
pcodonTTTTTA	3682	0.0936444	0.00912881	0.007	0.378	0.00346067	0.388428	1022	0.157476	0.0429496	0.001	0.954	5.05252e-05	0.938764	2.23253e-11	Monotone	TRUE	TRUE	FALSE	FALSE	TRUE	TRUE	FALSE	FALSE
pcodonTTTTTG	3682	0.113632	0.0354843	0	0.947049	2.24973e-16	0.941518	1084	0.142542	0.00961058	0.037	0.203	0.0280848	0.223825	0.00123041	non-significant monotone/non-monotone	TRUE	FALSE	FALSE	FALSE	TRUE	FALSE	FALSE	FALSE
pcodonTTTTCT	3682	0.0912551	0.0100309	0.012	0.561	0.00566808	0.574483	613	0.169364	0.00976103	0.063	0.191	0.0589286	0.205411	0.0144004	MIC not significant	TRUE	FALSE	FALSE	FALSE	TRUE	FALSE	FALSE	FALSE
pcodonTTTTCC	3682	0.0793584	0.00132763	0.515	0.623	0.536253	0.649543	370	0.191592	0.0292072	0.169	0.819	0.1754	0.811005	0.000964992	MIC not significant	FALSE	FALSE	FALSE	FALSE	FALSE	FALSE	FALSE	FALSE
pcodonTTTTCA	3682	0.0779509	0.00621519	0.488	0.972	0.509347	0.960279	264	0.198192	0.0116968	0.46	0.628	0.492955	0.655078	0.0794195	MIC not significant	FALSE	FALSE	FALSE	FALSE	FALSE	FALSE	FALSE	FALSE
pcodonTTTTCG	3682	0.0918088	0.00731832	0.004	0.216	0.00354577	0.223861	625	0.177536	0.0274021	0.008	0.38	0.00329863	0.401325	3.19879e-05	non-significant monotone/non-monotone	TRUE	TRUE	FALSE	FALSE	TRUE	TRUE	FALSE	FALSE
pcodonTTTTAT	3682	0.103767	0.0232298	0	0.756624	1.00533e-08	0.760088	884	0.151684	0.0189288	0.047	0.559	0.0349951	0.582645	4.05443e-05	non-significant monotone/non-monotone	TRUE	FALSE	FALSE	FALSE	TRUE	FALSE	FALSE	FALSE
pcodonTTTTAC	3682	0.0886457	0.0175758	0.013	0.996	0.00588517	0.992292	391	0.182621	0.00879751	0.2	0.305	0.205375	0.341343	0.0639074	MIC not significant	TRUE	FALSE	FALSE	FALSE	TRUE	FALSE	FALSE	FALSE
pcodonTTTTAA	3682	0.0968573	0.0139502	5.10204e-05	0.26402	5.2102e-06	0.270389	501	0.185436	0.0325066	0.025	0.635	0.016612	0.657078	4.93259e-05	non-significant monotone/non-monotone	TRUE	FALSE	FALSE	FALSE	TRUE	TRUE	FALSE	FALSE
pcodonTTTTAG	3682	0.0918716	0.015919	0.006	0.921	0.00223391	0.922347	553	0.183837	0.0235759	0.021	0.364	0.0124245	0.390757	0.000289985	non-significant monotone/non-monotone	TRUE	FALSE	FALSE	FALSE	TRUE	TRUE	FALSE	FALSE
pcodonTTTTGT	3682	0.112344	0.0370959	0	0.976845	3.78037e-17	0.971153	683	0.165031	0.00906755	0.079	0.196	0.0660785	0.219097	0.012785	MIC not significant	TRUE	FALSE	FALSE	FALSE	TRUE	FALSE	FALSE	FALSE
pcodonTTTTGC	3682	0.0786763	0.00340195	0.799	0.955	0.794055	0.954133	587	0.177645	0.0455109	0.021	0.959	0.00798054	0.939065	1.81048e-07	MIC not significant	FALSE	FALSE	FALSE	FALSE	FALSE	TRUE	FALSE	FALSE
pcodonTTTTGA	3682	0.091279	0.0155355	0.01	0.958	0.00731185	0.952167	675	0.180802	0.0216273	0.001	0.08	0.000191091	0.0619234	0.000125782	non-significant monotone/non-monotone	TRUE	TRUE	FALSE	FALSE	TRUE	TRUE	FALSE	FALSE
pcodonTTTTGG	3682	0.0998916	0.0196382	4.9505e-05	0.81203	4.53432e-06	0.812936	978	0.15676	0.0257897	0.005	0.495	0.0016295	0.509869	4.4515e-07	non-significant monotone/non-monotone	TRUE	TRUE	FALSE	FALSE	TRUE	TRUE	FALSE	FALSE
pcodonTTTCTT	3682	0.086054	0.00648768	0.192	0.78	0.184816	0.792722	785	0.187076	0.0377013	5.20833e-05	0.163396	5.1944e-07	0.166969	4.16328e-08	MIC not significant	FALSE	TRUE	FALSE	FALSE	FALSE	TRUE	FALSE	FALSE
pcodonTTTCTC	3682	0.0793783	0.00223417	0.36	0.583	0.367028	0.597422	269	0.235984	0.0419017	0.02	0.44	0.0169016	0.466236	0.000731446	MIC not significant	FALSE	FALSE	FALSE	FALSE	FALSE	TRUE	FALSE	FALSE
pcodonTTTCTA	3682	0.0873178	0.00988105	0.029	0.756	0.0193538	0.754304	428	0.238797	0.0310071	5.05051e-05	0.00293939	4.27303e-08	0.000555286	0.000251296	Non-monotone	FALSE	TRUE	FALSE	FALSE	FALSE	TRUE	FALSE	FALSE
pcodonTTTCTG	3682	0.0844999	0.00748422	0.132	0.773	0.115948	0.780284	421	0.170731	0.00812351	0.419	0.568	0.438424	0.594256	0.0646621	MIC not significant	FALSE	FALSE	FALSE	FALSE	FALSE	FALSE	FALSE	FALSE
pcodonTTTCCT	3682	0.0812946	0.000270361	0.542	0.55	0.547949	0.548213	582	0.19293	0.0379294	0.005	0.335	0.00036386	0.373717	2.20471e-06	MIC not significant	FALSE	TRUE	FALSE	FALSE	FALSE	TRUE	FALSE	FALSE
pcodonTTTCCC	3682	0.0787427	0.00244487	0.247	0.468	0.244092	0.479343	183	0.236965	0.012303	0.202	0.293	0.221596	0.309791	0.134962	MIC not significant	FALSE	FALSE	FALSE	FALSE	FALSE	FALSE	FALSE	FALSE
pcodonTTTCCA	3682	0.0816317	0.00502606	0.085	0.481	0.0838216	0.502141	205	0.233879	0.00343423	0.193	0.176	0.195866	0.178385	0.403918	MIC not significant	FALSE	FALSE	FALSE	FALSE	FALSE	FALSE	FALSE	FALSE
pcodonTTTCCG	3682	0.0820558	0.00370248	0.328	0.714	0.344618	0.715618	484	0.19365	0.0308903	0.022	0.453	0.0124378	0.494425	0.000101515	MIC not significant	FALSE	FALSE	FALSE	FALSE	FALSE	TRUE	FALSE	FALSE
pcodonTTTCAT	3682	0.0941032	0.0190629	0	0.534738	6.04509e-10	0.552433	125	0.253502	0.00127423	0.4	0.319	0.416238	0.331837	0.692686	MIC not significant	TRUE	FALSE	FALSE	FALSE	TRUE	FALSE	FALSE	FALSE
pcodonTTTCAC	3682	0.0758155	0.00396386	0.481	0.935	0.491802	0.929874	81	0.264668	0.0241036	0.236	0.343	0.268401	0.368497	0.166368	MIC not significant	FALSE	FALSE	FALSE	FALSE	FALSE	FALSE	FALSE	FALSE
pcodonTTTCAA	3682	0.0862328	0.00907811	0.000287129	0.267446	2.96105e-05	0.28018	77	0.229825	0.0287579	0.686	0.843	0.708114	0.830922	0.140365	MIC not significant	TRUE	FALSE	FALSE	FALSE	TRUE	FALSE	FALSE	FALSE
pcodonTTTCAG	3682	0.0749198	0.00356074	0.712	0.946	0.715741	0.936357	208	0.219578	0.013747	0.316	0.482	0.364427	0.519712	0.0916802	MIC not significant	FALSE	FALSE	FALSE	FALSE	FALSE	FALSE	FALSE	FALSE
pcodonTTTCGT	3682	0.0972165	0.0153082	0.000108911	0.486129	1.43204e-05	0.497322	653	0.187893	0.0401447	0.001	0.474545	0.000112722	0.50085	2.43493e-07	non-significant monotone/non-monotone	TRUE	TRUE	FALSE	FALSE	TRUE	TRUE	FALSE	FALSE
pcodonTTTCGC	3682	0.0842445	0.0108655	0.028	0.844	0.0165155	0.846128	213	0.363857	0.0817632	0	0.00145545	3.71031e-13	0.000128569	2.2607e-05	Non-monotone	FALSE	TRUE	FALSE	FALSE	FALSE	TRUE	FALSE	FALSE
pcodonTTTCGA	3682	0.0877564	0.00587213	0.027	0.32	0.0261784	0.35071	493	0.20182	0.0299918	0.006	0.164	0.000742013	0.174002	0.000111212	non-significant monotone/non-monotone	FALSE	TRUE	FALSE	FALSE	FALSE	TRUE	FALSE	FALSE
pcodonTTTCGG	3682	0.087943	0.0161702	0.031	0.994	0.0266287	0.990586	474	0.205294	0.0157789	0.004	0.033	0.000963347	0.0222938	0.00617309	Non-monotone	FALSE	TRUE	FALSE	FALSE	FALSE	TRUE	FALSE	FALSE
pcodonTTTATT	3682	0.0970139	0.00481278	0.000980198	0.0206832	0.000371233	0.0164867	1299	0.147196	0.0348227	0.000227723	0.786386	1.28271e-05	0.79033	1.21155e-11	non-significant monotone/non-monotone	TRUE	TRUE	FALSE	FALSE	TRUE	TRUE	FALSE	FALSE
pcodonTTTATC	3682	0.0824418	0.00372187	0.449	0.799	0.462666	0.797474	634	0.16746	0.0299927	0.082	0.905	0.0731857	0.895835	1.15859e-05	MIC not significant	FALSE	FALSE	FALSE	FALSE	FALSE	FALSE	FALSE	FALSE
pcodonTTTATA	3682	0.0898212	0.0126556	0.035	0.934	0.0249345	0.927486	760	0.16264	0.0424565	0.016	0.991	0.0103446	0.983213	9.88608e-09	Monotone	FALSE	FALSE	FALSE	FALSE	FALSE	TRUE	FALSE	FALSE
pcodonTTTATG	3682	0.0966806	0.0108537	0.002	0.299	0.000439382	0.302265	1100	0.174003	0.0410447	0	0.168103	1.80972e-10	0.170462	1.1842e-11	non-significant monotone/non-monotone	TRUE	TRUE	FALSE	FALSE	TRUE	TRUE	FALSE	FALSE
pcodonTTTACT	3682	0.0872454	0.0118804	0.034	0.915	0.0295551	0.908405	459	0.189093	0.0383763	0.041	0.838	0.0291014	0.828878	2.37283e-05	non-significant monotone/non-monotone	FALSE	FALSE	FALSE	FALSE	FALSE	FALSE	FALSE	FALSE
pcodonTTTACC	3682	0.0846935	1.26537e-05	0.049	0.042	0.0473472	0.0403364	316	0.214175	0.0464722	0.042	0.772	0.0287608	0.774956	0.000112254	non-significant monotone/non-monotone	FALSE	FALSE	FALSE	FALSE	FALSE	FALSE	FALSE	FALSE
pcodonTTTACA	3682	0.0779747	0.00029294	0.295	0.303	0.314557	0.318594	177	0.260892	0.0891891	0.078	0.985	0.0706378	0.968424	5.40008e-05	MIC not significant	FALSE	FALSE	FALSE	FALSE	FALSE	FALSE	FALSE	FALSE
pcodonTTTACG	3682	0.0810641	2.91573e-05	0.567	0.546	0.585733	0.557953	594	0.191137	0.0616131	0.002	0.993	0.000772191	0.989194	8.61626e-10	MIC not significant	FALSE	TRUE	FALSE	FALSE	FALSE	TRUE	FALSE	FALSE
pcodonTTTAAT	3682	0.0841912	0.0146578	0.06	0.995	0.0534604	0.994603	303	0.239461	0.034718	0.006	0.138	0.00165469	0.126333	0.00111977	MIC not significant	FALSE	TRUE	FALSE	FALSE	FALSE	TRUE	FALSE	FALSE
pcodonTTTAAC	3682	0.0791447	0.00476154	0.331	0.834	0.359656	0.83361	267	0.247266	0.0939992	0.013	0.994	0.0043312	0.983196	3.2241e-07	MIC not significant	FALSE	TRUE	FALSE	FALSE	FALSE	TRUE	FALSE	FALSE
pcodonTTTAAA	3682	0.0749827	0.00283553	0.659	0.878	0.667143	0.877706	187	0.266998	0.015381	0.022	0.051	0.0142693	0.0368359	0.0908153	MIC not significant	FALSE	FALSE	FALSE	FALSE	FALSE	TRUE	FALSE	FALSE
pcodonTTTAAG	3682	0.082483	1.87055e-05	0.441	0.408	0.439981	0.411643	591	0.191375	0.0607524	0.003	0.996	0.00124065	0.985206	1.25298e-09	MIC not significant	FALSE	TRUE	FALSE	FALSE	FALSE	TRUE	FALSE	FALSE
pcodonTTTAGT	3682	0.0873381	0.0141229	0.04	0.97	0.0281575	0.965284	421	0.227412	0.0475713	0.001	0.154	1.23593e-05	0.16054	6.29015e-06	non-significant monotone/non-monotone	FALSE	TRUE	FALSE	FALSE	FALSE	TRUE	FALSE	FALSE
pcodonTTTAGC	3682	0.0830421	0.000139996	0.192	0.189	0.193546	0.179285	402	0.255687	0.0745385	3.125e-05	0.250583	1.05664e-08	0.266462	2.6522e-08	MIC not significant	FALSE	TRUE	FALSE	FALSE	FALSE	TRUE	FALSE	FALSE
pcodonTTTAGA	3682	0.0873866	0.00475396	0.025	0.232	0.0231518	0.232619	447	0.181821	0.0414954	0.17	0.988	0.15728	0.970582	1.42273e-05	MIC not significant	FALSE	FALSE	FALSE	FALSE	FALSE	FALSE	FALSE	FALSE
pcodonTTTAGG	3682	0.0845482	0.00323131	0.316	0.637	0.330925	0.646878	810	0.193541	0.0713477	0	0.959693	4.51958e-10	0.946642	1.06504e-14	MIC not significant	FALSE	TRUE	FALSE	FALSE	FALSE	TRUE	FALSE	FALSE
pcodonTTTGTT	3682	0.0721917	0.000123148	0.924	0.922	0.913142	0.905527	87	0.322755	0.134525	0.076	0.957	0.0612804	0.936794	0.00047549	MIC not significant	FALSE	FALSE	FALSE	FALSE	FALSE	FALSE	FALSE	FALSE
pcodonTTTGTC	3682	0.0782859	0.00152781	0.826	0.92	0.829427	0.906847	586	0.180118	0.0464137	0.016	0.937	0.00698062	0.928475	1.39399e-07	MIC not significant	FALSE	FALSE	FALSE	FALSE	FALSE	TRUE	FALSE	FALSE
pcodonTTTGTA	3682	0.0774156	0.000722653	0.305	0.406	0.32325	0.428625	42	0.424267	0.0173824	0.015	0.012	0.00469125	0.00240534	0.405244	MIC not significant	FALSE	FALSE	FALSE	FALSE	FALSE	TRUE	FALSE	FALSE
pcodonTTTGTG	3682	0.096756	0.01615	0.000178218	0.661436	3.49894e-05	0.669853	701	0.179795	0.0264794	0.001	0.203	0.000548956	0.207515	1.49402e-05	non-significant monotone/non-monotone	TRUE	TRUE	FALSE	FALSE	TRUE	TRUE	FALSE	FALSE
pcodonTTTGCT	3682	0.091831	0.0173942	0.003	0.983	0.00245358	0.979981	600	0.159443	0.00648769	0.331	0.489	0.335468	0.511405	0.0486026	MIC not significant	TRUE	FALSE	FALSE	FALSE	TRUE	FALSE	FALSE	FALSE
pcodonTTTGCC	3682	0.0798413	0.00106664	0.496	0.586	0.519663	0.608267	400	0.198191	0.0309357	0.075	0.651	0.063415	0.664489	0.000408873	MIC not significant	FALSE	FALSE	FALSE	FALSE	FALSE	FALSE	FALSE	FALSE
pcodonTTTGCA	3682	0.0793328	0.00654986	0.396	0.954	0.40778	0.949085	306	0.235015	0.0613463	0.009	0.725	0.00214987	0.732955	1.16831e-05	MIC not significant	FALSE	TRUE	FALSE	FALSE	FALSE	TRUE	FALSE	FALSE
pcodonTTTGCG	3682	0.0910972	0.00316646	0.01	0.041	0.00609727	0.0460055	669	0.167463	0.0165226	0.035	0.247	0.019828	0.276938	0.000861271	non-significant monotone/non-monotone	TRUE	FALSE	FALSE	FALSE	TRUE	FALSE	FALSE	FALSE
pcodonTTTGAT	3682	0.0746778	0.0011023	0.808	0.93	0.817253	0.91091	50	0.469008	0.105626	0.009	0.063	0.00129878	0.0571815	0.021285	MIC not significant	FALSE	TRUE	FALSE	FALSE	FALSE	TRUE	FALSE	FALSE
pcodonTTTGAC	3682	0.086708	0.00671693	0.001	0.1	0.000338775	0.0836995	147	0.223668	0.0550562	0.373	0.959	0.4159	0.94451	0.00422802	MIC not significant	TRUE	FALSE	FALSE	FALSE	TRUE	FALSE	FALSE	FALSE
pcodonTTTGAA	3682	0.0888396	0.00668953	0.02	0.314	0.014743	0.325943	482	0.204477	0.0417987	0.003	0.469	0.000775138	0.484197	6.04625e-06	non-significant monotone/non-monotone	FALSE	TRUE	FALSE	FALSE	TRUE	TRUE	FALSE	FALSE
pcodonTTTGAG	3682	0.0811969	0.00926258	0.223	0.968	0.22965	0.964476	300	0.286377	0.0901134	3.09278e-05	0.272753	1.72423e-08	0.293959	1.1551e-07	MIC not significant	FALSE	TRUE	FALSE	FALSE	FALSE	TRUE	FALSE	FALSE
pcodonTTTGGT	3682	0.0906897	0.00974533	0.023	0.707	0.0196194	0.716619	864	0.155198	0.0338811	0.021	0.941	0.0114348	0.928292	5.05776e-08	non-significant monotone/non-monotone	FALSE	FALSE	FALSE	FALSE	FALSE	TRUE	FALSE	FALSE
pcodonTTTGGC	3682	0.0857464	0.00248154	0.13	0.332	0.141382	0.324486	631	0.175154	0.0414451	0.019	0.902	0.00612012	0.892496	2.4979e-07	MIC not significant	FALSE	FALSE	FALSE	FALSE	FALSE	TRUE	FALSE	FALSE
pcodonTTTGGA	3682	0.0836822	0.00074668	0.415	0.457	0.432534	0.484861	864	0.158168	0.0446312	0.014	0.991	0.00471317	0.986503	3.57102e-10	MIC not significant	FALSE	TRUE	FALSE	FALSE	FALSE	TRUE	FALSE	FALSE
pcodonTTTGGG	3682	0.107462	0.0249855	0	0.557314	1.69294e-11	0.568069	884	0.166188	0.0205233	0.004	0.125	0.000502605	0.133295	1.90747e-05	non-significant monotone/non-monotone	TRUE	TRUE	FALSE	FALSE	TRUE	TRUE	FALSE	FALSE
pcodonTTCTTT	3682	0.0929559	0.0101257	0.005	0.5	0.00506331	0.508877	860	0.155732	0.0222302	0.019	0.528	0.0109112	0.552154	1.13032e-05	non-significant monotone/non-monotone	TRUE	FALSE	FALSE	FALSE	TRUE	TRUE	FALSE	FALSE
pcodonTTCTTC	3682	0.0931933	0.000247579	0.001	0	0.00100141	0.000932147	649	0.190221	0.0593929	0.000722772	0.97104	7.59085e-05	0.95782	3.14058e-10	Monotone	TRUE	TRUE	FALSE	FALSE	TRUE	TRUE	FALSE	FALSE
pcodonTTCTTA	3682	0.0811862	7.27288e-05	0.62	0.603	0.63987	0.619921	698	0.196478	0.0916033	4.9505e-05	1	2.52247e-07	0.999965	2.97478e-16	MIC not significant	FALSE	TRUE	FALSE	FALSE	FALSE	TRUE	FALSE	FALSE
pcodonTTCTTG	3682	0.0936949	0.0105217	0.004	0.45	0.00228165	0.471218	808	0.172951	0.0495786	0.001	0.947	6.37383e-05	0.931739	1.55403e-10	non-significant monotone/non-monotone	TRUE	TRUE	FALSE	FALSE	TRUE	TRUE	FALSE	FALSE
pcodonTTCTCT	3682	0.08557	0.00462729	0.048	0.307	0.0390675	0.310419	382	0.181093	0.0136558	0.279	0.586	0.298662	0.591119	0.022353	MIC not significant	FALSE	FALSE	FALSE	FALSE	FALSE	FALSE	FALSE	FALSE
pcodonTTCTCC	3682	0.0838786	0.00119404	0.066	0.106	0.0633553	0.103991	301	0.22201	0.0510787	0.038	0.794	0.0279756	0.798753	7.62004e-05	MIC not significant	FALSE	FALSE	FALSE	FALSE	FALSE	FALSE	FALSE	FALSE
pcodonTTCTCA	3682	0.0783444	0.00564582	0.254	0.835	0.259958	0.831576	168	0.26644	0.0436441	0.036	0.262	0.0230918	0.291636	0.00657488	MIC not significant	FALSE	FALSE	FALSE	FALSE	FALSE	FALSE	FALSE	FALSE
pcodonTTCTCG	3682	0.0873995	0.000194029	0.027	0.027	0.0247855	0.0231122	439	0.219481	0.0589051	0.001	0.683	8.39202e-05	0.690546	2.6345e-07	non-significant monotone/non-monotone	FALSE	TRUE	FALSE	FALSE	FALSE	TRUE	FALSE	FALSE
pcodonTTCTAT	3682	0.0816722	0.000233336	0.354	0.349	0.369395	0.363829	456	0.20146	0.045912	0.005	0.687	0.00268212	0.702228	3.89813e-06	MIC not significant	FALSE	TRUE	FALSE	FALSE	FALSE	TRUE	FALSE	FALSE
pcodonTTCTAC	3682	0.0822259	0.0107527	0.167	0.984	0.155885	0.976299	302	0.221895	0.0434927	0.04	0.617	0.0238724	0.650112	0.000262883	MIC not significant	FALSE	FALSE	FALSE	FALSE	FALSE	FALSE	FALSE	FALSE
pcodonTTCTAA	3682	0.0824374	0.00252572	0.061	0.163	0.0544179	0.169546	210	0.216114	0.0046655	0.356	0.352	0.378727	0.374379	0.32459	MIC not significant	FALSE	FALSE	FALSE	FALSE	FALSE	FALSE	FALSE	FALSE
pcodonTTCTAG	3682	0.0883085	0.0121175	0.015	0.838	0.00817194	0.824246	396	0.237113	0.0148984	0.00050495	0.00291089	2.12534e-05	0.000562343	0.0150838	Non-monotone	FALSE	TRUE	FALSE	FALSE	TRUE	TRUE	TRUE	FALSE
pcodonTTCTGT	3682	0.0880166	0.0134709	0.004	0.87	0.0039565	0.868569	335	0.204698	0.0484418	0.098	0.941	0.100794	0.937065	4.83883e-05	MIC not significant	TRUE	FALSE	FALSE	FALSE	TRUE	FALSE	FALSE	FALSE
pcodonTTCTGC	3682	0.0818421	0.00060024	0.265	0.3	0.272056	0.304982	388	0.18956	0.0250609	0.115	0.627	0.119318	0.636286	0.00176025	MIC not significant	FALSE	FALSE	FALSE	FALSE	FALSE	FALSE	FALSE	FALSE
pcodonTTCTGA	3682	0.079309	0.00141035	0.488	0.624	0.50282	0.63269	369	0.209788	0.0413963	0.023	0.666	0.0207034	0.693394	8.27329e-05	MIC not significant	FALSE	FALSE	FALSE	FALSE	FALSE	FALSE	FALSE	FALSE
pcodonTTCTGG	3682	0.0822617	0.00178367	0.447	0.611	0.453523	0.617479	603	0.213599	0.0462015	3.9604e-05	0.0947921	3.55455e-08	0.0887688	9.83863e-08	MIC not significant	FALSE	TRUE	FALSE	FALSE	FALSE	TRUE	FALSE	FALSE
pcodonTTCCTT	3682	0.0802912	0.000265299	0.609	0.612	0.612877	0.611337	514	0.185373	0.0546646	0.042	0.999	0.029608	0.993389	8.21637e-08	MIC not significant	FALSE	FALSE	FALSE	FALSE	FALSE	FALSE	FALSE	FALSE
pcodonTTCCTC	3682	0.0734227	0.000680255	0.8	0.833	0.80402	0.839403	171	0.222312	0.0503553	0.322	0.916	0.333073	0.909011	0.00317148	MIC not significant	FALSE	FALSE	FALSE	FALSE	FALSE	FALSE	FALSE	FALSE
pcodonTTCCTA	3682	0.0827319	0.0014716	0.12	0.201	0.107795	0.182581	273	0.234492	0.022459	0.035	0.136	0.019644	0.137488	0.0131824	MIC not significant	FALSE	FALSE	FALSE	FALSE	FALSE	FALSE	FALSE	FALSE
pcodonTTCCTG	3682	0.0798605	0.0044173	0.341	0.79	0.349738	0.793633	295	0.24195	0.0313338	0.008	0.135	0.00341755	0.12607	0.00227676	MIC not significant	FALSE	TRUE	FALSE	FALSE	FALSE	TRUE	FALSE	FALSE
pcodonTTCCCT	3682	0.0816002	0.00112967	0.246	0.316	0.247949	0.330601	350	0.221917	0.0984358	0.00686139	0.99998	0.0021739	0.999514	1.96326e-09	MIC not significant	FALSE	TRUE	FALSE	FALSE	FALSE	TRUE	FALSE	FALSE
pcodonTTCCCC	3682	0.0765636	0.000333856	0.386	0.398	0.393342	0.400849	120	0.263322	0.0193453	0.126	0.201	0.128765	0.222883	0.129759	MIC not significant	FALSE	FALSE	FALSE	FALSE	FALSE	FALSE	FALSE	FALSE
pcodonTTCCCA	3682	0.0756806	0.000462718	0.494	0.528	0.518392	0.546849	95	0.362868	0.0903743	0.002	0.131	0.000266931	0.126761	0.00307521	MIC not significant	FALSE	TRUE	FALSE	FALSE	FALSE	TRUE	FALSE	FALSE
pcodonTTCCCG	3682	0.0738754	1.7037e-05	0.907	0.897	0.8996	0.886242	276	0.224701	0.0337748	0.052	0.429	0.0413412	0.458731	0.00217331	MIC not significant	FALSE	FALSE	FALSE	FALSE	FALSE	FALSE	FALSE	FALSE
pcodonTTCCAC	3682	0.0752574	0.000514387	0.7	0.744	0.716056	0.751613	56	0.363095	0.0152819	0.041	0.033	0.0264472	0.0222795	0.364031	MIC not significant	FALSE	FALSE	FALSE	FALSE	FALSE	FALSE	FALSE	FALSE
pcodonTTCCAG	3682	0.0790452	7.60271e-05	0.117	0.107	0.115772	0.102731	110	0.234031	0.0129563	0.622	0.658	0.651523	0.69369	0.236401	MIC not significant	FALSE	FALSE	FALSE	FALSE	FALSE	FALSE	FALSE	FALSE
pcodonTTCCGT	3682	0.0753956	0.000846447	0.709	0.765	0.713213	0.766986	239	0.235475	0.0571658	0.059	0.842	0.0500881	0.838759	0.000190584	MIC not significant	FALSE	FALSE	FALSE	FALSE	FALSE	FALSE	FALSE	FALSE
pcodonTTCCGC	3682	0.0788462	0.00172864	0.16	0.283	0.152736	0.294912	114	0.374329	0.110173	0.002	0.144	1.77145e-05	0.149369	0.000308858	MIC not significant	FALSE	TRUE	FALSE	FALSE	FALSE	TRUE	FALSE	FALSE
pcodonTTCCGA	3682	0.0818847	0.00165599	0.063	0.111	0.0482495	0.107447	180	0.261215	0.0948322	0.042	0.992	0.039549	0.97761	2.60581e-05	MIC not significant	FALSE	FALSE	FALSE	FALSE	FALSE	FALSE	FALSE	FALSE
pcodonTTCCGG	3682	0.0848307	0.00551948	0.025	0.287	0.0182274	0.295589	249	0.308582	0.0784815	2.08333e-05	0.0393125	5.26134e-09	0.0272042	7.16993e-06	Non-monotone	FALSE	TRUE	FALSE	FALSE	FALSE	TRUE	FALSE	FALSE
pcodonTTCATT	3682	0.0953842	0.00507068	0.001	0.027	0.000462068	0.0217876	860	0.165658	0.0420273	0.004	0.902	0.000331121	0.88611	1.29708e-09	non-significant monotone/non-monotone	TRUE	TRUE	FALSE	FALSE	TRUE	TRUE	FALSE	FALSE
pcodonTTCATC	3682	0.0874475	0.00330668	0.018	0.108	0.0156029	0.0992563	413	0.207597	0.0542958	0.012	0.885	0.00502327	0.870504	1.69193e-06	non-significant monotone/non-monotone	FALSE	TRUE	FALSE	FALSE	FALSE	TRUE	FALSE	FALSE
pcodonTTCATA	3682	0.0802023	0.0024435	0.427	0.645	0.436608	0.671082	363	0.202797	0.0464522	0.075	0.946	0.068326	0.934459	3.45854e-05	MIC not significant	FALSE	FALSE	FALSE	FALSE	FALSE	FALSE	FALSE	FALSE
pcodonTTCATG	3682	0.0847064	0.00240898	0.255	0.477	0.271995	0.493464	708	0.191379	0.0396012	6.93069e-05	0.186574	1.17265e-06	0.193878	9.336e-08	MIC not significant	FALSE	TRUE	FALSE	FALSE	FALSE	TRUE	FALSE	FALSE
pcodonTTCACT	3682	0.0778615	0.00169655	0.528	0.691	0.543084	0.70353	286	0.214409	0.0233309	0.068	0.295	0.0561474	0.316078	0.00968071	MIC not significant	FALSE	FALSE	FALSE	FALSE	FALSE	FALSE	FALSE	FALSE
pcodonTTCACC	3682	0.0828099	0.00123933	0.048	0.082	0.0412548	0.0741689	217	0.241754	0.0971549	0.051	0.999	0.0371432	0.994726	2.83765e-06	MIC not significant	FALSE	FALSE	FALSE	FALSE	FALSE	FALSE	FALSE	FALSE
pcodonTTCACA	3682	0.0759681	0.000763092	0.437	0.522	0.473568	0.550421	79	0.247017	0.000565053	0.451	0.343	0.509989	0.389943	0.835275	MIC not significant	FALSE	FALSE	FALSE	FALSE	FALSE	FALSE	FALSE	FALSE
pcodonTTCACG	3682	0.0787665	0.00331727	0.513	0.817	0.519379	0.822675	327	0.213002	0.0551915	0.066	0.958	0.0565741	0.940179	1.76909e-05	MIC not significant	FALSE	FALSE	FALSE	FALSE	FALSE	FALSE	FALSE	FALSE
pcodonTTCAAT	3682	0.0826444	0.00891581	0.055	0.826	0.0492671	0.824395	223	0.195427	0.0362665	0.513	0.978	0.548203	0.951188	0.00431695	MIC not significant	FALSE	FALSE	FALSE	FALSE	FALSE	FALSE	FALSE	FALSE
pcodonTTCAAC	3682	0.0726642	0.0013288	0.912	0.958	0.9089	0.949602	227	0.285432	0.0540132	0.001	0.037	1.05231e-05	0.0332233	0.000414447	MIC not significant	FALSE	TRUE	FALSE	FALSE	FALSE	TRUE	FALSE	FALSE
pcodonTTCAAA	3682	0.0801036	0.00187641	0.087	0.182	0.0889889	0.196371	136	0.246636	0.0352364	0.297	0.689	0.328042	0.710174	0.0286417	MIC not significant	FALSE	FALSE	FALSE	FALSE	FALSE	FALSE	FALSE	FALSE
pcodonTTCAAG	3682	0.0872735	0.00421121	0.043	0.235	0.0366073	0.247384	469	0.20288	0.0686736	0.017	0.997	0.00621231	0.990322	8.35963e-09	Monotone	FALSE	FALSE	FALSE	FALSE	FALSE	TRUE	FALSE	FALSE
pcodonTTCAGT	3682	0.0753315	0.00210317	0.661	0.831	0.661468	0.833797	195	0.26581	0.0659035	0.01	0.501	0.00427316	0.519357	0.000291533	MIC not significant	FALSE	TRUE	FALSE	FALSE	FALSE	TRUE	FALSE	FALSE
pcodonTTCAGC	3682	0.0764082	0.000128139	0.696	0.684	0.693866	0.679609	268	0.235437	0.0602787	0.034	0.823	0.0167603	0.825524	4.84752e-05	MIC not significant	FALSE	FALSE	FALSE	FALSE	FALSE	TRUE	FALSE	FALSE
pcodonTTCAGA	3682	0.0758871	0.00056101	0.575	0.624	0.593773	0.625865	206	0.230651	0.068711	0.225	0.991	0.246724	0.982527	0.000141165	MIC not significant	FALSE	FALSE	FALSE	FALSE	FALSE	FALSE	FALSE	FALSE
pcodonTTCAGG	3682	0.0823612	0.00100658	0.332	0.425	0.34692	0.424847	481	0.200808	0.0379113	0.006	0.45	0.00230323	0.490624	1.70491e-05	MIC not significant	FALSE	TRUE	FALSE	FALSE	FALSE	TRUE	FALSE	FALSE
pcodonTTCGTC	3682	0.0747189	2.35963e-07	0.917	0.9	0.913606	0.901788	387	0.184487	0.0208928	0.171	0.642	0.199578	0.653879	0.00438179	MIC not significant	FALSE	FALSE	FALSE	FALSE	FALSE	FALSE	FALSE	FALSE
pcodonTTCGTG	3682	0.0785099	0.00239515	0.643	0.848	0.661417	0.846441	409	0.202232	0.0421491	0.025	0.744	0.0165782	0.754924	2.86516e-05	MIC not significant	FALSE	FALSE	FALSE	FALSE	FALSE	TRUE	FALSE	FALSE
pcodonTTCGCT	3682	0.095321	0.0153355	1.9802e-05	0.415069	4.39233e-06	0.426641	380	0.213165	0.0302269	0.011	0.236	0.00463047	0.238254	0.000664251	non-significant monotone/non-monotone	TRUE	TRUE	FALSE	FALSE	TRUE	TRUE	FALSE	FALSE
pcodonTTCGCC	3682	0.0807378	0.000114044	0.276	0.261	0.281934	0.267142	310	0.21295	0.0368719	0.044	0.59	0.0390022	0.614519	0.000676587	MIC not significant	FALSE	FALSE	FALSE	FALSE	FALSE	FALSE	FALSE	FALSE
pcodonTTCGCA	3682	0.0810412	0.00569632	0.047	0.514	0.0439893	0.517922	154	0.23961	0.0538846	0.342	0.945	0.391047	0.926893	0.00376904	MIC not significant	FALSE	FALSE	FALSE	FALSE	FALSE	FALSE	FALSE	FALSE
pcodonTTCGCG	3682	0.0877758	0.00366109	0.025	0.157	0.0231564	0.152902	493	0.197369	0.032335	0.008	0.321	0.00290672	0.337766	5.93761e-05	non-significant monotone/non-monotone	FALSE	TRUE	FALSE	FALSE	FALSE	TRUE	FALSE	FALSE
pcodonTTCGAC	3682	0.0803577	0.00620474	0.054	0.706	0.0469703	0.715725	84	0.356822	0.140504	0.028	0.868	0.020724	0.851158	0.000443121	MIC not significant	FALSE	FALSE	FALSE	FALSE	FALSE	FALSE	FALSE	FALSE
pcodonTTCGAA	3682	0.0815092	0.000172291	0.127	0.121	0.118653	0.112869	239	0.218535	0.00970582	0.199	0.277	0.221574	0.30572	0.128822	MIC not significant	FALSE	FALSE	FALSE	FALSE	FALSE	FALSE	FALSE	FALSE
pcodonTTCGAG	3682	0.0712738	0.00123211	0.943	0.972	0.941079	0.968097	179	0.260919	0.0265401	0.065	0.193	0.0455478	0.195589	0.0293382	MIC not significant	FALSE	FALSE	FALSE	FALSE	FALSE	FALSE	FALSE	FALSE
pcodonTTCGGT	3682	0.0837662	0.00669529	0.145	0.788	0.151582	0.791645	438	0.191511	0.0216111	0.06	0.406	0.0537075	0.434501	0.00203817	MIC not significant	FALSE	FALSE	FALSE	FALSE	FALSE	FALSE	FALSE	FALSE
pcodonTTCGGC	3682	0.0856025	9.34173e-06	0.054	0.05	0.05053	0.0438206	362	0.241418	0.0787831	0.000861386	0.858911	5.31839e-05	0.852837	5.58934e-08	MIC not significant	FALSE	TRUE	FALSE	FALSE	FALSE	TRUE	FALSE	FALSE
pcodonTTCGGA	3682	0.0827343	9.04819e-05	0.329	0.313	0.337293	0.318144	540	0.21482	0.0708851	6.25e-05	0.815646	2.54111e-07	0.816536	3.24915e-10	MIC not significant	FALSE	TRUE	FALSE	FALSE	FALSE	TRUE	FALSE	FALSE
pcodonTTCGGG	3682	0.0938386	0.00690943	0.001	0.04	0.000159255	0.0366299	482	0.187737	0.0328333	0.037	0.709	0.0284962	0.718644	6.30798e-05	non-significant monotone/non-monotone	TRUE	FALSE	FALSE	FALSE	TRUE	FALSE	FALSE	FALSE
pcodonTTATTT	3682	0.0944357	0.00202636	0.008	0.024	0.0047966	0.0169693	1311	0.155168	0.0407486	9.90099e-06	0.772812	2.02177e-07	0.778164	1.60557e-13	non-significant monotone/non-monotone	TRUE	TRUE	FALSE	FALSE	TRUE	TRUE	FALSE	FALSE
pcodonTTATTC	3682	0.0910193	0.000527645	0.0099505	0.0116535	0.00675398	0.00810379	652	0.204843	0.0750241	3.125e-05	0.972063	6.46863e-08	0.958302	1.10214e-12	Monotone	TRUE	TRUE	FALSE	FALSE	TRUE	TRUE	FALSE	FALSE
pcodonTTATTA	3682	0.0888046	0.00396523	0.095	0.36	0.0889698	0.378194	1065	0.22771	0.130678	0	0.99999	1.86653e-39	0.999912	3.17965e-34	MIC not significant	FALSE	TRUE	FALSE	FALSE	FALSE	TRUE	FALSE	FALSE
pcodonTTATTG	3682	0.0890664	0.00600917	0.061	0.474	0.0558837	0.492009	853	0.15441	0.0289295	0.029	0.874	0.0202914	0.865334	5.8305e-07	MIC not significant	FALSE	FALSE	FALSE	FALSE	FALSE	FALSE	FALSE	FALSE
pcodonTTATCT	3682	0.083682	0.00139957	0.205	0.304	0.205613	0.307648	494	0.215076	0.0314428	0.001	0.033	9.31487e-06	0.0247781	7.41306e-05	MIC not significant	FALSE	TRUE	FALSE	FALSE	FALSE	TRUE	FALSE	FALSE
pcodonTTATCC	3682	0.0756336	0.00157614	0.839	0.91	0.8371	0.912867	339	0.251318	0.0820731	0.002	0.73	7.84899e-06	0.734828	7.95355e-08	MIC not significant	FALSE	TRUE	FALSE	FALSE	FALSE	TRUE	FALSE	FALSE
pcodonTTATCA	3682	0.0725218	0.00303257	0.927	0.991	0.91951	0.986066	229	0.277635	0.0292008	0.001	0.026	0.000393016	0.0160497	0.00957377	MIC not significant	FALSE	TRUE	FALSE	FALSE	FALSE	TRUE	FALSE	FALSE
pcodonTTATCG	3682	0.0835823	0.000349212	0.193	0.195	0.188925	0.195351	449	0.198625	0.0628088	0.019	0.995	0.0104758	0.986378	7.37465e-08	MIC not significant	FALSE	FALSE	FALSE	FALSE	FALSE	TRUE	FALSE	FALSE
pcodonTTATAT	3682	0.0885652	2.60399e-05	0.046	0.039	0.040849	0.0340508	668	0.19456	0.0726226	9.375e-05	0.995042	1.21493e-06	0.987907	1.406e-12	Monotone	FALSE	TRUE	FALSE	FALSE	FALSE	TRUE	FALSE	FALSE
pcodonTTATAC	3682	0.0766263	0.00210641	0.62	0.813	0.632532	0.812511	253	0.244003	0.100345	0.011	0.998	0.00473538	0.992171	2.64982e-07	MIC not significant	FALSE	TRUE	FALSE	FALSE	FALSE	TRUE	FALSE	FALSE
pcodonTTATAA	3682	0.0859535	0.00401426	0.026	0.177	0.0221386	0.173175	323	0.212313	0.037036	0.101	0.738	0.0950546	0.741913	0.000505433	MIC not significant	FALSE	FALSE	FALSE	FALSE	FALSE	FALSE	FALSE	FALSE
pcodonTTATAG	3682	0.0807852	0.00318865	0.267	0.6	0.277296	0.608786	335	0.20127	0.0113973	0.14	0.275	0.150125	0.300328	0.0509054	MIC not significant	FALSE	FALSE	FALSE	FALSE	FALSE	FALSE	FALSE	FALSE
pcodonTTATGT	3682	0.0946196	0.0160143	0.000178218	0.653455	3.51735e-05	0.662142	448	0.174615	0.0378991	0.265	0.995	0.296797	0.98787	3.34246e-05	MIC not significant	TRUE	FALSE	FALSE	FALSE	TRUE	FALSE	FALSE	FALSE
pcodonTTATGC	3682	0.0715538	0.00016415	0.996	0.996	0.990923	0.990073	409	0.225324	0.0879464	0.001	0.996	9.60233e-05	0.988133	9.51742e-10	MIC not significant	FALSE	TRUE	FALSE	FALSE	FALSE	TRUE	FALSE	FALSE
pcodonTTATGA	3682	0.0769124	0.000626808	0.788	0.816	0.782346	0.811624	374	0.225767	0.0713391	0.006	0.912	0.000620468	0.900963	1.57454e-07	MIC not significant	FALSE	TRUE	FALSE	FALSE	FALSE	TRUE	FALSE	FALSE
pcodonTTATGG	3682	0.0833907	0.000142603	0.379	0.363	0.385799	0.369116	671	0.17309	0.0497526	0.013	0.986	0.00487101	0.980677	5.19334e-09	MIC not significant	FALSE	TRUE	FALSE	FALSE	FALSE	TRUE	FALSE	FALSE
pcodonTTACTT	3682	0.0745066	6.83667e-05	0.993	0.991	0.990208	0.988372	731	0.200333	0.0597414	1.04167e-05	0.622188	9.48993e-09	0.642174	2.0991e-11	MIC not significant	FALSE	TRUE	FALSE	FALSE	FALSE	TRUE	FALSE	FALSE
pcodonTTACTC	3682	0.071271	8.08056e-05	0.972	0.967	0.962961	0.958772	223	0.257496	0.117657	0.00871287	0.999426	0.0027204	0.996075	1.4904e-07	MIC not significant	FALSE	TRUE	FALSE	FALSE	FALSE	TRUE	FALSE	FALSE
pcodonTTACTA	3682	0.0838493	0.00724639	0.126	0.777	0.122548	0.78559	385	0.191764	0.0356789	0.123	0.832	0.107203	0.825744	0.000193142	MIC not significant	FALSE	FALSE	FALSE	FALSE	FALSE	FALSE	FALSE	FALSE
pcodonTTACTG	3682	0.0873662	0.00875708	0.014	0.605	0.0154492	0.61314	407	0.213211	0.021033	0.007	0.064	0.00241072	0.0613624	0.00336419	non-significant monotone/non-monotone	TRUE	TRUE	FALSE	FALSE	FALSE	TRUE	FALSE	FALSE
pcodonTTACCT	3682	0.0813728	0.000566458	0.426	0.461	0.438933	0.470245	484	0.176807	0.0554892	0.154208	0.999911	0.156642	0.999332	1.58066e-07	MIC not significant	FALSE	FALSE	FALSE	FALSE	FALSE	FALSE	FALSE	FALSE
pcodonTTACCC	3682	0.0772985	0.00188469	0.354	0.555	0.374209	0.568887	175	0.223635	0.0159165	0.501	0.655	0.537398	0.679484	0.0961838	MIC not significant	FALSE	FALSE	FALSE	FALSE	FALSE	FALSE	FALSE	FALSE
pcodonTTACCA	3682	0.0713583	0.00114569	0.926	0.963	0.923602	0.957625	136	0.232948	0.01451	0.442	0.554	0.485095	0.586144	0.162447	MIC not significant	FALSE	FALSE	FALSE	FALSE	FALSE	FALSE	FALSE	FALSE
pcodonTTACCG	3682	0.078476	2.54806e-05	0.56	0.527	0.567961	0.540918	340	0.19882	0.041472	0.135	0.929	0.130862	0.909683	0.000156245	MIC not significant	FALSE	FALSE	FALSE	FALSE	FALSE	FALSE	FALSE	FALSE
pcodonTTACAT	3682	0.0783564	0.00552198	0.168	0.904	0.170373	0.897269	68	0.326178	0.0498769	0.152	0.344	0.156794	0.38537	0.0671466	MIC not significant	FALSE	FALSE	FALSE	FALSE	FALSE	FALSE	FALSE	FALSE
pcodonTTACAC	3682	0.0805917	0.00225246	0.04	0.154	0.0313208	0.142497	73	0.356518	0.0326055	0.021	0.042	0.0108569	0.0324369	0.126324	Non-monotone	FALSE	FALSE	FALSE	FALSE	FALSE	TRUE	FALSE	FALSE
pcodonTTACAA	3682	0.0789905	0.0038787	0.117	0.639	0.119821	0.663897	59	0.36437	0.306262	0.0296337	1	0.0139236	0.999942	5.46731e-06	MIC not significant	FALSE	FALSE	FALSE	FALSE	FALSE	TRUE	FALSE	FALSE
pcodonTTACAG	3682	0.079364	0.000597773	0.146	0.169	0.157793	0.182708	156	0.243488	0.0579877	0.241	0.925	0.253519	0.915333	0.00246039	MIC not significant	FALSE	FALSE	FALSE	FALSE	FALSE	FALSE	FALSE	FALSE
pcodonTTACGT	3682	0.0864503	0.00775979	0.044	0.618	0.036948	0.638973	442	0.193998	0.0367021	0.049	0.751	0.0305477	0.758861	5.03708e-05	non-significant monotone/non-monotone	FALSE	FALSE	FALSE	FALSE	FALSE	FALSE	FALSE	FALSE
pcodonTTACGC	3682	0.0791552	0.00350434	0.143	0.466	0.145924	0.480189	138	0.25635	0.0764046	0.157	0.948	0.16519	0.934851	0.00103156	MIC not significant	FALSE	FALSE	FALSE	FALSE	FALSE	FALSE	FALSE	FALSE
pcodonTTACGA	3682	0.0840312	0.00404711	0.079	0.347	0.0751682	0.363692	321	0.228325	0.0250269	0.006	0.055	0.00122896	0.0451625	0.00449406	MIC not significant	FALSE	TRUE	FALSE	FALSE	FALSE	TRUE	FALSE	FALSE
pcodonTTACGG	3682	0.0799806	0.00672166	0.334	0.942	0.355815	0.929136	321	0.194904	0.0272115	0.183	0.715	0.185854	0.719448	0.00303382	MIC not significant	FALSE	FALSE	FALSE	FALSE	FALSE	FALSE	FALSE	FALSE
pcodonTTAATT	3682	0.0852065	0.000235538	0.414	0.402	0.417999	0.415099	1199	0.174796	0.0653917	0	0.979782	9.07602e-13	0.969436	2.3542e-19	MIC not significant	FALSE	TRUE	FALSE	FALSE	FALSE	TRUE	FALSE	FALSE
pcodonTTAATC	3682	0.0924479	0.000886742	0.001	0.004	0.00201094	0.00330725	629	0.219133	0.0798004	0	0.74886	1.52619e-11	0.756494	5.26655e-13	non-significant monotone/non-monotone	TRUE	TRUE	FALSE	FALSE	TRUE	TRUE	FALSE	FALSE
pcodonTTAATA	3682	0.080796	0.000336667	0.611	0.623	0.624488	0.632148	607	0.219847	0.0802504	0	0.86292	5.03314e-10	0.857426	1.15046e-12	MIC not significant	FALSE	TRUE	FALSE	FALSE	FALSE	TRUE	FALSE	FALSE
pcodonTTAATG	3682	0.0926723	0.00208894	0.009	0.02	0.00489947	0.0192089	942	0.164478	0.0257467	0.001	0.211	6.21769e-05	0.209801	7.40813e-07	non-significant monotone/non-monotone	TRUE	TRUE	FALSE	FALSE	TRUE	TRUE	FALSE	FALSE
pcodonTTAACT	3682	0.0786388	0.00067705	0.705	0.756	0.724314	0.761179	474	0.176399	0.0439142	0.21	0.999	0.225062	0.992798	4.19412e-06	MIC not significant	FALSE	FALSE	FALSE	FALSE	FALSE	FALSE	FALSE	FALSE
pcodonTTAACC	3682	0.0899237	0.00275257	0.001	0.007	0.000584002	0.00578166	345	0.20292	0.041353	0.075	0.843	0.0637536	0.843589	0.000142813	MIC not significant	TRUE	FALSE	FALSE	FALSE	TRUE	FALSE	FALSE	FALSE
pcodonTTAACA	3682	0.0797928	0.00178297	0.147	0.289	0.1513	0.281172	187	0.246756	0.0288833	0.093	0.3	0.0808732	0.349292	0.0200504	MIC not significant	FALSE	FALSE	FALSE	FALSE	FALSE	FALSE	FALSE	FALSE
pcodonTTAACG	3682	0.087843	0.0059817	0.045	0.379	0.0373643	0.395528	511	0.220901	0.108558	0.000138614	1	1.86162e-06	0.99997	2.10139e-14	Monotone	FALSE	TRUE	FALSE	FALSE	FALSE	TRUE	FALSE	FALSE
pcodonTTAAAT	3682	0.0817394	0.00478441	0.159	0.593	0.150741	0.604068	282	0.216539	0.0496355	0.071	0.836	0.0601536	0.8337	0.000161823	MIC not significant	FALSE	FALSE	FALSE	FALSE	FALSE	FALSE	FALSE	FALSE
pcodonTTAAAC	3682	0.075922	6.71378e-05	0.742	0.725	0.746937	0.727659	276	0.2243	0.0453986	0.058	0.686	0.0464698	0.711584	0.000364232	MIC not significant	FALSE	FALSE	FALSE	FALSE	FALSE	FALSE	FALSE	FALSE
pcodonTTAAAA	3682	0.0764181	0.000594129	0.418	0.465	0.414091	0.452081	130	0.273607	0.0171829	0.153	0.199	0.14023	0.216423	0.137128	MIC not significant	FALSE	FALSE	FALSE	FALSE	FALSE	FALSE	FALSE	FALSE
pcodonTTAAAG	3682	0.0855647	0.00971026	0.118	0.904	0.117332	0.899029	506	0.246101	0.116558	0	0.994802	3.3378e-13	0.986779	2.80394e-15	MIC not significant	FALSE	TRUE	FALSE	FALSE	FALSE	TRUE	FALSE	FALSE
pcodonTTAAGT	3682	0.0824074	0.00430373	0.094	0.44	0.0981225	0.456509	262	0.205815	0.0374082	0.344	0.945	0.37532	0.927957	0.00165843	MIC not significant	FALSE	FALSE	FALSE	FALSE	FALSE	FALSE	FALSE	FALSE
pcodonTTAAGC	3682	0.0825956	0.00237998	0.109	0.245	0.104271	0.253562	276	0.231645	0.04268	0.026	0.466	0.0153589	0.49812	0.000552516	MIC not significant	FALSE	FALSE	FALSE	FALSE	FALSE	TRUE	FALSE	FALSE
pcodonTTAAGA	3682	0.0771661	0.000438885	0.455	0.468	0.463655	0.483463	211	0.237426	0.0654442	0.099	0.948	0.0942712	0.931333	0.000172212	MIC not significant	FALSE	FALSE	FALSE	FALSE	FALSE	FALSE	FALSE	FALSE
pcodonTTAAGG	3682	0.079628	0.000290482	0.606	0.605	0.627023	0.630375	494	0.224467	0.088835	3.125e-05	0.985219	2.33132e-07	0.97347	1.36056e-11	MIC not significant	FALSE	TRUE	FALSE	FALSE	FALSE	TRUE	FALSE	FALSE
pcodonTTAGTC	3682	0.0840909	0.000891566	0.127	0.156	0.118696	0.157157	416	0.218568	0.0494187	0.002	0.417	0.000253324	0.445947	4.69716e-06	MIC not significant	FALSE	TRUE	FALSE	FALSE	FALSE	TRUE	FALSE	FALSE
pcodonTTAGTG	3682	0.0903783	0.00935027	0.007	0.434	0.00391928	0.443453	466	0.193194	0.0333462	0.018	0.471	0.0092302	0.492351	7.34596e-05	non-significant monotone/non-monotone	TRUE	FALSE	FALSE	FALSE	TRUE	TRUE	FALSE	FALSE
pcodonTTAGCT	3682	0.0800638	0.00504328	0.43	0.886	0.448969	0.885878	385	0.214267	0.0538079	0.007	0.759	0.00129302	0.759705	4.23351e-06	MIC not significant	FALSE	TRUE	FALSE	FALSE	FALSE	TRUE	FALSE	FALSE
pcodonTTAGCC	3682	0.0735768	3.55531e-05	0.864	0.845	0.867232	0.851788	241	0.264176	0.03787	0.002	0.067	0.000547829	0.0548166	0.00241019	MIC not significant	FALSE	TRUE	FALSE	FALSE	FALSE	TRUE	FALSE	FALSE
pcodonTTAGCA	3682	0.0769636	0.00120901	0.349	0.465	0.357414	0.47264	156	0.258278	0.110075	0.118	0.999	0.119126	0.996933	2.3263e-05	MIC not significant	FALSE	FALSE	FALSE	FALSE	FALSE	FALSE	FALSE	FALSE
pcodonTTAGCG	3682	0.0775494	0.000287609	0.71	0.712	0.714916	0.718465	335	0.217556	0.0595859	0.028	0.926	0.0186921	0.918298	6.19391e-06	MIC not significant	FALSE	FALSE	FALSE	FALSE	FALSE	FALSE	FALSE	FALSE
pcodonTTAGAC	3682	0.0714376	0.00219173	0.959	0.998	0.94344	0.989324	89	0.255838	0.0176968	0.484	0.557	0.526916	0.595146	0.213947	MIC not significant	FALSE	FALSE	FALSE	FALSE	FALSE	FALSE	FALSE	FALSE
pcodonTTAGAA	3682	0.0773409	0.00351095	0.418	0.784	0.432673	0.795511	202	0.222341	0.0295662	0.376	0.786	0.419118	0.796063	0.0144078	MIC not significant	FALSE	FALSE	FALSE	FALSE	FALSE	FALSE	FALSE	FALSE
pcodonTTAGAG	3682	0.0750397	0.00180645	0.605	0.783	0.616791	0.778832	159	0.280006	0.115469	0.024	0.998	0.0150255	0.981916	1.1753e-05	MIC not significant	FALSE	FALSE	FALSE	FALSE	FALSE	TRUE	FALSE	FALSE
pcodonTTAGGT	3682	0.0844077	0.00837881	0.196	0.904	0.187798	0.908545	516	0.223115	0.0503434	8.91089e-05	0.155703	3.21979e-07	0.159257	2.60164e-07	MIC not significant	FALSE	TRUE	FALSE	FALSE	FALSE	TRUE	FALSE	FALSE
pcodonTTAGGC	3682	0.0802407	0.000562746	0.499	0.532	0.500395	0.532514	442	0.213443	0.0438696	0.002	0.382	0.000364954	0.410897	8.98232e-06	MIC not significant	FALSE	TRUE	FALSE	FALSE	FALSE	TRUE	FALSE	FALSE
pcodonTTAGGA	3682	0.0847844	0.000183432	0.208	0.204	0.197764	0.191276	557	0.187772	0.0585971	0.008	0.994	0.00490248	0.990041	7.18851e-09	MIC not significant	FALSE	TRUE	FALSE	FALSE	FALSE	TRUE	FALSE	FALSE
pcodonTTAGGG	3682	0.0866387	0.00774324	0.101	0.804	0.106623	0.804617	668	0.161645	0.0136053	0.068	0.36	0.0593721	0.367237	0.00253318	MIC not significant	FALSE	FALSE	FALSE	FALSE	FALSE	FALSE	FALSE	FALSE
pcodonTTGTTT	3682	0.120679	0.0319616	0	0.0810577	1.80847e-24	0.0771162	992	0.152289	0.027441	0.006	0.762	0.00489614	0.772315	1.54487e-07	non-significant monotone/non-monotone	TRUE	TRUE	FALSE	FALSE	TRUE	TRUE	FALSE	FALSE
pcodonTTGTTC	3682	0.0959017	0.0112011	0.000613861	0.265337	0.000146169	0.273193	762	0.19672	0.0421734	0	0.0632772	1.11325e-09	0.0543872	1.0612e-08	non-significant monotone/non-monotone	TRUE	TRUE	FALSE	FALSE	TRUE	TRUE	FALSE	FALSE
pcodonTTGTTA	3682	0.0911706	0.00917948	0.007	0.519	0.00775177	0.519984	666	0.156134	0.0260045	0.172	0.948	0.179288	0.929428	2.89987e-05	MIC not significant	TRUE	FALSE	FALSE	FALSE	TRUE	FALSE	FALSE	FALSE
pcodonTTGTTG	3682	0.126302	0.0485114	0	0.947238	3.71363e-32	0.942295	978	0.147866	0.00422755	0.053	0.09	0.0374942	0.0807139	0.0420616	MIC not significant	TRUE	FALSE	FALSE	FALSE	TRUE	FALSE	FALSE	FALSE
pcodonTTGTCT	3682	0.101936	0.0204981	0	0.394129	2.42868e-09	0.404462	490	0.202637	0.0150728	0.002	0.018	0.000455118	0.0122006	0.00650809	Non-monotone	TRUE	TRUE	FALSE	FALSE	TRUE	TRUE	FALSE	FALSE
pcodonTTGTCC	3682	0.0836503	0.00495073	0.098	0.507	0.0944143	0.517232	344	0.221307	0.0111331	0.016	0.031	0.00653065	0.0243764	0.0505449	MIC not significant	FALSE	FALSE	FALSE	FALSE	FALSE	TRUE	FALSE	FALSE
pcodonTTGTCA	3682	0.0874304	0.0127518	0.004	0.787	0.00174909	0.78571	239	0.206696	0.0362554	0.395	0.943	0.428055	0.921197	0.0031237	MIC not significant	TRUE	FALSE	FALSE	FALSE	TRUE	FALSE	FALSE	FALSE
pcodonTTGTCG	3682	0.100378	0.0146933	0	0.0919223	4.69979e-08	0.0894696	516	0.184579	0.0245748	0.04	0.486	0.0345994	0.501663	0.000350939	non-significant monotone/non-monotone	TRUE	FALSE	FALSE	FALSE	TRUE	FALSE	FALSE	FALSE
pcodonTTGTAT	3682	0.0865743	0.0126706	0.049	0.981	0.0500978	0.97293	482	0.187968	0.01534	0.046	0.217	0.0384062	0.231709	0.00647712	non-significant monotone/non-monotone	FALSE	FALSE	FALSE	FALSE	FALSE	FALSE	FALSE	FALSE
pcodonTTGTAC	3682	0.0930432	0.0164794	0.000203883	0.750417	4.35946e-05	0.754238	349	0.197845	0.0140068	0.099	0.243	0.0899956	0.269636	0.0270492	MIC not significant	TRUE	FALSE	FALSE	FALSE	TRUE	FALSE	FALSE	FALSE
pcodonTTGTAA	3682	0.0958107	0.0166452	9.70874e-06	0.296534	8.30133e-08	0.305061	248	0.209131	0.0230767	0.243	0.616	0.269401	0.64247	0.0166608	MIC not significant	TRUE	FALSE	FALSE	FALSE	TRUE	FALSE	FALSE	FALSE
pcodonTTGTAG	3682	0.0979728	0.0193644	2.9703e-05	0.691158	9.57768e-07	0.698176	480	0.192139	0.0334143	0.04	0.631	0.0243736	0.663446	5.61561e-05	non-significant monotone/non-monotone	TRUE	FALSE	FALSE	FALSE	TRUE	FALSE	FALSE	FALSE
pcodonTTGTGT	3682	0.116963	0.0480426	0	0.999893	1.12829e-23	0.99958	518	0.151883	0.00825817	0.816	0.921	0.811257	0.917035	0.0386823	MIC not significant	TRUE	FALSE	FALSE	FALSE	TRUE	FALSE	FALSE	FALSE
pcodonTTGTGC	3682	0.0843371	0.00619619	0.191	0.778	0.191895	0.790039	533	0.171746	0.0220693	0.097	0.654	0.0978226	0.667215	0.000580059	MIC not significant	FALSE	FALSE	FALSE	FALSE	FALSE	FALSE	FALSE	FALSE
pcodonTTGTGA	3682	0.0971778	0.0180694	1.9802e-05	0.671149	3.79831e-06	0.678987	508	0.163362	0.00660238	0.484	0.654	0.525412	0.671912	0.0672633	MIC not significant	TRUE	FALSE	FALSE	FALSE	TRUE	FALSE	FALSE	FALSE
pcodonTTGTGG	3682	0.0999235	0.0205011	2.94118e-05	0.823412	1.62437e-06	0.824941	821	0.181793	0.0178151	9.375e-05	0.0081875	3.23796e-06	0.00351427	0.000125169	Non-monotone	TRUE	TRUE	FALSE	FALSE	TRUE	TRUE	FALSE	FALSE
pcodonTTGCTT	3682	0.0988374	0.00975774	0	0.0229703	1.33656e-06	0.0191334	598	0.156406	0.0131649	0.429	0.838	0.471426	0.830456	0.0049661	MIC not significant	TRUE	FALSE	FALSE	FALSE	TRUE	FALSE	FALSE	FALSE
pcodonTTGCTC	3682	0.0844956	0.00469876	0.016	0.188	0.0148992	0.187771	212	0.212628	0.0204996	0.371	0.677	0.403522	0.68603	0.0372416	MIC not significant	FALSE	FALSE	FALSE	FALSE	TRUE	FALSE	FALSE	FALSE
pcodonTTGCTA	3682	0.083936	0.00964217	0.047	0.824	0.0382332	0.832807	253	0.214577	0.0434801	0.14	0.83	0.137964	0.828179	0.000846798	MIC not significant	FALSE	FALSE	FALSE	FALSE	FALSE	FALSE	FALSE	FALSE
pcodonTTGCTG	3682	0.0932129	0.0138334	0.000148515	0.465337	4.55636e-05	0.47747	365	0.181768	0.0199279	0.436	0.849	0.453925	0.853954	0.00690758	MIC not significant	TRUE	FALSE	FALSE	FALSE	TRUE	FALSE	FALSE	FALSE
pcodonTTGCCT	3682	0.0889606	0.00406967	0.011	0.107	0.0105742	0.107556	481	0.209972	0.0355027	0.001	0.169	0.000144337	0.168761	3.19693e-05	non-significant monotone/non-monotone	TRUE	TRUE	FALSE	FALSE	TRUE	TRUE	FALSE	FALSE
pcodonTTGCCC	3682	0.0762093	0.00197746	0.494	0.704	0.498519	0.693455	171	0.204862	0.0200882	0.539	0.768	0.568029	0.77707	0.0644363	MIC not significant	FALSE	FALSE	FALSE	FALSE	FALSE	FALSE	FALSE	FALSE
pcodonTTGCCA	3682	0.0784878	0.00519183	0.276	0.839	0.281418	0.837298	192	0.209272	0.00131402	0.489	0.401	0.519472	0.44575	0.61766	MIC not significant	FALSE	FALSE	FALSE	FALSE	FALSE	FALSE	FALSE	FALSE
pcodonTTGCCG	3682	0.082233	0.00463812	0.282	0.741	0.297044	0.748371	433	0.185767	0.0284432	0.15	0.824	0.147939	0.806612	0.000424224	MIC not significant	FALSE	FALSE	FALSE	FALSE	FALSE	FALSE	FALSE	FALSE
pcodonTTGCAT	3682	0.0862045	0.00951838	0.00045	0.31274	8.20919e-05	0.326461	96	0.203892	0.000409352	0.855	0.771	0.844278	0.775782	0.844876	MIC not significant	TRUE	FALSE	FALSE	FALSE	TRUE	FALSE	FALSE	FALSE
pcodonTTGCAC	3682	0.0815153	0.00497064	0.022	0.374	0.0157871	0.391444	71	0.240908	0.0483056	0.71	0.948	0.730897	0.91859	0.0656637	MIC not significant	FALSE	FALSE	FALSE	FALSE	FALSE	FALSE	FALSE	FALSE
pcodonTTGCAG	3682	0.0788338	0.0039552	0.195	0.616	0.195223	0.617625	161	0.286509	0.0193076	0.017	0.029	0.00803232	0.0252053	0.0787648	MIC not significant	FALSE	FALSE	FALSE	FALSE	FALSE	TRUE	FALSE	FALSE
pcodonTTGCGT	3682	0.0850443	0.00690015	0.05	0.561	0.0417889	0.581388	322	0.175089	0.0141627	0.586	0.855	0.618744	0.836928	0.0327778	MIC not significant	FALSE	FALSE	FALSE	FALSE	FALSE	FALSE	FALSE	FALSE
pcodonTTGCGC	3682	0.0844876	0.00476072	0.005	0.105	0.00275498	0.0967052	157	0.23376	0.00622455	0.357	0.359	0.377492	0.377238	0.326004	MIC not significant	TRUE	FALSE	FALSE	FALSE	TRUE	FALSE	FALSE	FALSE
pcodonTTGCGA	3682	0.0843652	0.00948867	0.029	0.782	0.0275917	0.792907	274	0.226726	0.00907638	0.048	0.068	0.0338602	0.059781	0.115633	non-significant monotone/non-monotone	FALSE	FALSE	FALSE	FALSE	FALSE	FALSE	FALSE	FALSE
pcodonTTGCGG	3682	0.0900444	0.0207687	0.00126531	0.997837	0.000564637	0.995783	308	0.1937	0.00785573	0.344	0.432	0.366254	0.469637	0.120608	MIC not significant	TRUE	FALSE	FALSE	FALSE	TRUE	FALSE	FALSE	FALSE
pcodonTTGATT	3682	0.112519	0.0260667	0	0.287455	1.13491e-14	0.296128	1343	0.138532	0.0158592	0.003	0.217	0.000971652	0.208584	3.67063e-06	non-significant monotone/non-monotone	TRUE	TRUE	FALSE	FALSE	TRUE	TRUE	FALSE	FALSE
pcodonTTGATC	3682	0.0893345	0.00941339	0.045	0.774	0.035764	0.769438	739	0.173623	0.0133311	0.004	0.041	0.00112331	0.0337242	0.00166686	Non-monotone	FALSE	TRUE	FALSE	FALSE	FALSE	TRUE	FALSE	FALSE
pcodonTTGATA	3682	0.0896764	0.0134753	0.02	0.95	0.0223133	0.952282	693	0.18227	0.0261686	0.001	0.134	0.000189395	0.144099	1.87714e-05	non-significant monotone/non-monotone	FALSE	TRUE	FALSE	FALSE	FALSE	TRUE	FALSE	FALSE
pcodonTTGATG	3682	0.115761	0.0344212	0	0.74901	1.36189e-18	0.753811	1083	0.136298	0.00732286	0.143	0.393	0.140589	0.413795	0.00483147	MIC not significant	TRUE	FALSE	FALSE	FALSE	TRUE	FALSE	FALSE	FALSE
pcodonTTGACT	3682	0.0893587	0.0120912	0.018	0.858	0.0152702	0.852282	540	0.19226	0.0270144	0.005	0.184	0.000939045	0.178669	0.000124717	non-significant monotone/non-monotone	FALSE	TRUE	FALSE	FALSE	FALSE	TRUE	FALSE	FALSE
pcodonTTGACC	3682	0.0849093	0.00153162	0.108	0.175	0.099462	0.17271	428	0.179714	0.0109724	0.16	0.339	0.163898	0.359599	0.0302582	MIC not significant	FALSE	FALSE	FALSE	FALSE	FALSE	FALSE	FALSE	FALSE
pcodonTTGACA	3682	0.0821295	0.00591661	0.095	0.611	0.090722	0.613154	232	0.187944	0.00571761	0.817	0.849	0.823399	0.841545	0.251318	MIC not significant	FALSE	FALSE	FALSE	FALSE	FALSE	FALSE	FALSE	FALSE
pcodonTTGACG	3682	0.0848487	4.19301e-05	0.204	0.181	0.201641	0.184891	601	0.155295	0.0300698	0.457	0.997	0.487464	0.99398	1.91407e-05	MIC not significant	FALSE	FALSE	FALSE	FALSE	FALSE	FALSE	FALSE	FALSE
pcodonTTGAAT	3682	0.102497	0.0219415	0	0.489168	8.47017e-10	0.49823	485	0.167897	0.0227957	0.349	0.925	0.3733	0.91431	0.000851139	MIC not significant	TRUE	FALSE	FALSE	FALSE	TRUE	FALSE	FALSE	FALSE
pcodonTTGAAC	3682	0.0789792	0.007886	0.603	0.99	0.603319	0.990749	410	0.188926	0.0051223	0.111	0.151	0.112741	0.150439	0.148004	MIC not significant	FALSE	FALSE	FALSE	FALSE	FALSE	FALSE	FALSE	FALSE
pcodonTTGAAA	3682	0.098261	0.014225	0	0.0588155	1.04473e-08	0.0539068	309	0.205247	0.0491285	0.134	0.965	0.125673	0.939531	8.51448e-05	MIC not significant	TRUE	FALSE	FALSE	FALSE	TRUE	FALSE	FALSE	FALSE
pcodonTTGAAG	3682	0.0742031	0.000281944	0.994	0.992	0.990151	0.990545	762	0.164302	0.0294683	0.005	0.668	0.00355579	0.679282	1.8764e-06	MIC not significant	FALSE	TRUE	FALSE	FALSE	FALSE	TRUE	FALSE	FALSE
pcodonTTGAGT	3682	0.0903107	0.0177032	0.001	0.977	0.00107676	0.96974	360	0.193353	0.0148351	0.243	0.525	0.246901	0.546642	0.020802	MIC not significant	TRUE	FALSE	FALSE	FALSE	TRUE	FALSE	FALSE	FALSE
pcodonTTGAGC	3682	0.0855821	0.00246428	0.054	0.152	0.0482753	0.147433	366	0.18982	0.00694982	0.242	0.331	0.260755	0.35793	0.111341	MIC not significant	FALSE	FALSE	FALSE	FALSE	FALSE	FALSE	FALSE	FALSE
pcodonTTGAGA	3682	0.077337	0.00436561	0.668	0.95	0.66776	0.95031	316	0.229486	0.0410625	0.007	0.258	0.00147434	0.274278	0.000288294	MIC not significant	FALSE	TRUE	FALSE	FALSE	FALSE	TRUE	FALSE	FALSE
pcodonTTGAGG	3682	0.0809741	0.00715363	0.656	0.994	0.659624	0.991257	685	0.16144	0.0320677	0.107	0.973	0.0930007	0.960911	2.39996e-06	MIC not significant	FALSE	FALSE	FALSE	FALSE	FALSE	FALSE	FALSE	FALSE
pcodonTTGGTC	3682	0.0806951	0.00690723	0.364	0.951	0.373641	0.936233	368	0.21083	0.0531303	0.025	0.899	0.0155515	0.891041	7.93214e-06	MIC not significant	FALSE	FALSE	FALSE	FALSE	FALSE	TRUE	FALSE	FALSE
pcodonTTGGTG	3682	0.0889631	0.0175145	0.012	0.997	0.0108555	0.994086	495	0.18173	0.024249	0.059	0.513	0.0499902	0.539205	0.000506967	MIC not significant	TRUE	FALSE	FALSE	FALSE	TRUE	FALSE	FALSE	FALSE
pcodonTTGGCT	3682	0.102237	0.0299001	0	0.996592	6.80231e-09	0.994549	583	0.15632	0.00532749	0.354	0.476	0.372637	0.50429	0.0782501	MIC not significant	TRUE	FALSE	FALSE	FALSE	TRUE	FALSE	FALSE	FALSE
pcodonTTGGCC	3682	0.0922916	0.0102134	0.002	0.259	0.000251155	0.266889	438	0.22279	0.0375789	0.001	0.106	2.73713e-05	0.091602	4.42192e-05	non-significant monotone/non-monotone	TRUE	TRUE	FALSE	FALSE	TRUE	TRUE	FALSE	FALSE
pcodonTTGGCA	3682	0.0821771	0.0133819	0.125	0.996	0.126312	0.994883	278	0.246392	0.00248986	0.005	0.004	0.00121023	0.000878371	0.40725	MIC not significant	FALSE	TRUE	FALSE	FALSE	FALSE	TRUE	FALSE	FALSE
pcodonTTGGCG	3682	0.0882727	0.0146205	0.057	0.993	0.0466198	0.992409	655	0.149082	0.0156924	0.495	0.924	0.510388	0.918703	0.00131562	MIC not significant	FALSE	FALSE	FALSE	FALSE	FALSE	FALSE	FALSE	FALSE
pcodonTTGGAC	3682	0.0854268	0.013581	0.003	0.882	0.000691433	0.87856	118	0.304833	0.107357	0.025	0.807	0.00949268	0.811893	0.000292499	non-significant monotone/non-monotone	TRUE	FALSE	FALSE	FALSE	TRUE	TRUE	FALSE	FALSE
pcodonTTGGAA	3682	0.0778671	0.00775077	0.55	0.996	0.565668	0.989559	288	0.190228	0.0304947	0.366	0.917	0.380912	0.902649	0.00294409	MIC not significant	FALSE	FALSE	FALSE	FALSE	FALSE	FALSE	FALSE	FALSE
pcodonTTGGAG	3682	0.0812936	0.00558855	0.079	0.564	0.0732403	0.579611	189	0.219133	0.00359644	0.331	0.308	0.374892	0.343039	0.412373	MIC not significant	FALSE	FALSE	FALSE	FALSE	FALSE	FALSE	FALSE	FALSE
pcodonTTGGGT	3682	0.105125	0.0301701	0	0.982019	1.56872e-10	0.977197	694	0.144956	0.00526516	0.568	0.716	0.593367	0.728804	0.056053	MIC not significant	TRUE	FALSE	FALSE	FALSE	TRUE	FALSE	FALSE	FALSE
pcodonTTGGGC	3682	0.0917575	0.0110757	0.006	0.551	0.00214099	0.5616	545	0.17026	0.0165039	0.109	0.451	0.0995572	0.488756	0.00265866	MIC not significant	TRUE	FALSE	FALSE	FALSE	TRUE	FALSE	FALSE	FALSE
pcodonTTGGGA	3682	0.0957745	0.0128663	0.001	0.459	0.000176327	0.455872	746	0.149606	0.0159746	0.264	0.827	0.278163	0.819294	0.000539765	MIC not significant	TRUE	FALSE	FALSE	FALSE	TRUE	FALSE	FALSE	FALSE
pcodonTTGGGG	3682	0.114429	0.0408231	0	0.993524	3.41626e-19	0.990625	685	0.163593	0.00864295	0.078	0.214	0.0740966	0.226404	0.0149321	MIC not significant	TRUE	FALSE	FALSE	FALSE	TRUE	FALSE	FALSE	FALSE
pcodonTCTTTT	3682	0.0953666	0.0209526	0.000326531	0.981286	8.22833e-05	0.976811	593	0.205341	0.0144756	0.001	0.002	7.197e-06	0.000535686	0.00334264	Non-monotone	TRUE	TRUE	FALSE	FALSE	TRUE	TRUE	TRUE	FALSE
pcodonTCTTTC	3682	0.0792642	0.00130063	0.584	0.697	0.585346	0.696206	407	0.195754	0.0275849	0.077	0.548	0.0623302	0.576362	0.000768872	MIC not significant	FALSE	FALSE	FALSE	FALSE	FALSE	FALSE	FALSE	FALSE
pcodonTCTTTA	3682	0.0873273	0.00273367	0.033	0.119	0.0308215	0.124714	490	0.215899	0.0689693	0.001	0.856	1.16285e-05	0.857571	3.58231e-09	non-significant monotone/non-monotone	FALSE	TRUE	FALSE	FALSE	FALSE	TRUE	FALSE	FALSE
pcodonTCTTTG	3682	0.0965931	0.0332925	9.18367e-05	1	1.85329e-05	1	573	0.173939	0.0151119	0.054	0.273	0.0460408	0.299258	0.00320456	MIC not significant	TRUE	FALSE	FALSE	FALSE	TRUE	FALSE	FALSE	FALSE
pcodonTCTTCT	3682	0.08601	0.00812424	0.022	0.541	0.0142477	0.560269	312	0.167623	0.00574622	0.85	0.883	0.844873	0.877492	0.181709	MIC not significant	FALSE	FALSE	FALSE	FALSE	TRUE	FALSE	FALSE	FALSE
pcodonTCTTCC	3682	0.0729948	0.00118916	0.848	0.92	0.845816	0.905461	162	0.220569	0.0432034	0.433	0.923	0.473422	0.903986	0.00795158	MIC not significant	FALSE	FALSE	FALSE	FALSE	FALSE	FALSE	FALSE	FALSE
pcodonTCTTCA	3682	0.0860696	0.00416412	0.001	0.036	0.000690615	0.0267469	165	0.24397	0.0393524	0.144	0.581	0.146269	0.61006	0.0106423	MIC not significant	TRUE	FALSE	FALSE	FALSE	TRUE	FALSE	FALSE	FALSE
pcodonTCTTCG	3682	0.0792311	0.00200583	0.429	0.619	0.43008	0.629656	308	0.23732	0.0341187	0.003	0.134	0.00169163	0.126797	0.00112765	MIC not significant	FALSE	TRUE	FALSE	FALSE	FALSE	TRUE	FALSE	FALSE
pcodonTCTTAT	3682	0.0916882	0.00739265	0.00149038	0.116221	0.000717939	0.114583	437	0.180925	0.0184495	0.212	0.645	0.22392	0.662116	0.00444804	MIC not significant	TRUE	FALSE	FALSE	FALSE	TRUE	FALSE	FALSE	FALSE
pcodonTCTTAC	3682	0.0780348	0.00414961	0.271	0.713	0.280949	0.72473	172	0.219163	0.00303302	0.36	0.319	0.39019	0.348614	0.473034	MIC not significant	FALSE	FALSE	FALSE	FALSE	FALSE	FALSE	FALSE	FALSE
pcodonTCTTAA	3682	0.0850232	0.010132	0.008	0.676	0.00604776	0.688579	203	0.32058	0.0267575	0.000227723	0.00159406	2.28003e-06	0.000136314	0.0197031	Non-monotone	TRUE	TRUE	FALSE	FALSE	TRUE	TRUE	TRUE	FALSE
pcodonTCTTAG	3682	0.080363	0.00736881	0.258	0.931	0.265176	0.925852	271	0.245136	0.042556	0.01	0.231	0.00341807	0.26122	0.000632893	MIC not significant	FALSE	TRUE	FALSE	FALSE	FALSE	TRUE	FALSE	FALSE
pcodonTCTTGT	3682	0.091021	0.0129217	0.000617647	0.504392	0.000159508	0.51698	297	0.249179	0.02848	0.00329167	0.0433854	0.000584172	0.0334088	0.00353364	Non-monotone	TRUE	TRUE	FALSE	FALSE	TRUE	TRUE	FALSE	FALSE
pcodonTCTTGC	3682	0.079445	0.00399358	0.193	0.594	0.200657	0.603132	192	0.231446	0.0276934	0.163	0.465	0.153791	0.494065	0.0210579	MIC not significant	FALSE	FALSE	FALSE	FALSE	FALSE	FALSE	FALSE	FALSE
pcodonTCTTGA	3682	0.0839458	0.00856151	0.084	0.821	0.0775942	0.825286	333	0.218849	0.0313287	0.029	0.352	0.019468	0.372053	0.00118098	MIC not significant	FALSE	FALSE	FALSE	FALSE	FALSE	FALSE	FALSE	FALSE
pcodonTCTTGG	3682	0.0816333	0.00701371	0.328	0.933	0.33387	0.92978	423	0.188947	0.0190861	0.065	0.339	0.0570703	0.359989	0.0044185	MIC not significant	FALSE	FALSE	FALSE	FALSE	FALSE	FALSE	FALSE	FALSE
pcodonTCTCTT	3682	0.0888659	0.0049175	0.001	0.068	0.00177884	0.0627792	327	0.234118	0.0335542	0.008	0.16	0.00339333	0.177836	0.000874865	non-significant monotone/non-monotone	TRUE	TRUE	FALSE	FALSE	TRUE	TRUE	FALSE	FALSE
pcodonTCTCTC	3682	0.0730935	0.000144602	0.808	0.793	0.808405	0.797614	115	0.252004	0.0435164	0.323	0.75	0.346919	0.758304	0.0252678	MIC not significant	FALSE	FALSE	FALSE	FALSE	FALSE	FALSE	FALSE	FALSE
pcodonTCTCTA	3682	0.0782323	0.0021261	0.276	0.494	0.289322	0.495678	176	0.268869	0.0280045	0.055	0.159	0.0319393	0.172554	0.0264224	MIC not significant	FALSE	FALSE	FALSE	FALSE	FALSE	FALSE	FALSE	FALSE
pcodonTCTCTG	3682	0.0849737	0.01205	0.019	0.89	0.0117184	0.875349	229	0.197407	0.0392661	0.714	0.998	0.726663	0.989385	0.00259386	MIC not significant	FALSE	FALSE	FALSE	FALSE	TRUE	FALSE	FALSE	FALSE
pcodonTCTCCT	3682	0.0773098	0.00195182	0.702	0.848	0.712592	0.847592	355	0.184203	0.0159367	0.239	0.581	0.267264	0.597567	0.0173269	MIC not significant	FALSE	FALSE	FALSE	FALSE	FALSE	FALSE	FALSE	FALSE
pcodonTCTCCC	3682	0.0749217	0.00275105	0.587	0.864	0.600634	0.863746	112	0.244623	0.0852744	0.423	0.996	0.467046	0.988264	0.00178322	MIC not significant	FALSE	FALSE	FALSE	FALSE	FALSE	FALSE	FALSE	FALSE
pcodonTCTCCA	3682	0.0765983	0.00115898	0.383	0.499	0.397813	0.509826	109	0.301366	0.0242672	0.071	0.128	0.0575987	0.127519	0.105765	MIC not significant	FALSE	FALSE	FALSE	FALSE	FALSE	FALSE	FALSE	FALSE
pcodonTCTCCG	3682	0.0762598	0.00248848	0.636	0.855	0.648874	0.847646	239	0.211326	0.0356091	0.31	0.899	0.347205	0.882171	0.00340769	MIC not significant	FALSE	FALSE	FALSE	FALSE	FALSE	FALSE	FALSE	FALSE
pcodonTCTCAT	3682	0.0789327	0.00246212	0.094	0.418	0.0772489	0.46048	43	0.34801	0.0312172	0.083	0.099	0.0690009	0.0859899	0.256108	MIC not significant	FALSE	FALSE	FALSE	FALSE	FALSE	FALSE	FALSE	FALSE
pcodonTCTCAG	3682	0.0773789	0.000617813	0.255	0.29	0.271195	0.31803	71	0.331889	0.130563	0.086	0.909	0.0804312	0.88964	0.00208423	MIC not significant	FALSE	FALSE	FALSE	FALSE	FALSE	FALSE	FALSE	FALSE
pcodonTCTCGT	3682	0.0804231	0.00680043	0.155	0.805	0.15121	0.798482	196	0.239325	0.0192295	0.08	0.175	0.0698217	0.192046	0.0525811	MIC not significant	FALSE	FALSE	FALSE	FALSE	FALSE	FALSE	FALSE	FALSE
pcodonTCTCGC	3682	0.0782533	0.00197069	0.202	0.478	0.201129	0.502402	51	0.205797	0.00319916	0.975	0.931	0.94405	0.900474	0.692623	MIC not significant	FALSE	FALSE	FALSE	FALSE	FALSE	FALSE	FALSE	FALSE
pcodonTCTCGA	3682	0.0756857	0.00310703	0.499	0.831	0.529365	0.830862	151	0.210372	0.0232611	0.787	0.939	0.799326	0.927983	0.0615496	MIC not significant	FALSE	FALSE	FALSE	FALSE	FALSE	FALSE	FALSE	FALSE
pcodonTCTCGG	3682	0.0854142	0.00785662	0.004	0.287	0.001906	0.291856	151	0.327381	0.0912411	0.005	0.344	0.000539982	0.376341	0.00016365	non-significant monotone/non-monotone	TRUE	TRUE	FALSE	FALSE	TRUE	TRUE	FALSE	FALSE
pcodonTCTATT	3682	0.0866213	0.00816518	0.092	0.821	0.0894808	0.814552	587	0.185255	0.0337689	0.004	0.447	0.00151132	0.473087	7.43094e-06	MIC not significant	FALSE	TRUE	FALSE	FALSE	FALSE	TRUE	FALSE	FALSE
pcodonTCTATC	3682	0.0773941	0.00494473	0.493	0.932	0.522416	0.917248	244	0.244091	0.0196018	0.022	0.066	0.0104828	0.0638626	0.0287775	MIC not significant	FALSE	FALSE	FALSE	FALSE	FALSE	TRUE	FALSE	FALSE
pcodonTCTATA	3682	0.0925089	0.0158346	9.18367e-05	0.645582	2.178e-05	0.655362	286	0.234835	0.0545292	0.011	0.51	0.00378166	0.54756	6.68974e-05	non-significant monotone/non-monotone	TRUE	TRUE	FALSE	FALSE	TRUE	TRUE	FALSE	FALSE
pcodonTCTATG	3682	0.0948607	0.0162452	0.000257426	0.71603	5.82914e-05	0.722076	503	0.168105	0.0208193	0.213	0.781	0.219831	0.784695	0.00117448	MIC not significant	TRUE	FALSE	FALSE	FALSE	TRUE	FALSE	FALSE	FALSE
pcodonTCTACT	3682	0.0843119	0.00571049	0.062	0.471	0.0538721	0.473119	305	0.206717	0.0212975	0.139	0.471	0.151043	0.494846	0.0107143	MIC not significant	FALSE	FALSE	FALSE	FALSE	FALSE	FALSE	FALSE	FALSE
pcodonTCTACC	3682	0.0755097	0.0014944	0.548	0.679	0.557534	0.706793	141	0.293557	0.0532952	0.011	0.178	0.00396053	0.186107	0.00588384	MIC not significant	FALSE	TRUE	FALSE	FALSE	FALSE	TRUE	FALSE	FALSE
pcodonTCTACA	3682	0.0749649	0.00114566	0.596	0.72	0.617776	0.727307	113	0.290034	0.0019326	0.084	0.055	0.0730273	0.0464698	0.643836	MIC not significant	FALSE	FALSE	FALSE	FALSE	FALSE	FALSE	FALSE	FALSE
pcodonTCTACG	3682	0.0817506	0.00282036	0.106	0.299	0.100324	0.306793	234	0.235999	0.00794893	0.069	0.087	0.0548746	0.0766253	0.17407	MIC not significant	FALSE	FALSE	FALSE	FALSE	FALSE	FALSE	FALSE	FALSE
pcodonTCTAAT	3682	0.0806713	0.00327584	0.145	0.418	0.147655	0.437921	214	0.178279	0.00652582	0.924	0.936	0.907434	0.926724	0.239295	MIC not significant	FALSE	FALSE	FALSE	FALSE	FALSE	FALSE	FALSE	FALSE
pcodonTCTAAC	3682	0.0767329	0.00291718	0.382	0.684	0.386557	0.707748	147	0.334027	0.0259308	0.000514851	0.0020099	8.32074e-06	0.00014403	0.0513603	MIC not significant	FALSE	TRUE	FALSE	FALSE	FALSE	TRUE	FALSE	FALSE
pcodonTCTAAA	3682	0.0806931	0.00748847	0.049	0.769	0.0440921	0.76653	116	0.341734	0.102478	0.004	0.321	0.000594832	0.352819	0.000459817	non-significant monotone/non-monotone	FALSE	TRUE	FALSE	FALSE	FALSE	TRUE	FALSE	FALSE
pcodonTCTAAG	3682	0.0829743	0.000911907	0.179	0.225	0.172349	0.223989	370	0.236754	0.0486325	0.003	0.205	0.000142496	0.223953	1.86561e-05	MIC not significant	FALSE	TRUE	FALSE	FALSE	FALSE	TRUE	FALSE	FALSE
pcodonTCTAGT	3682	0.0861354	0.0106595	0.003	0.633	0.00288801	0.642404	215	0.235946	0.0212784	0.09	0.267	0.0819969	0.26911	0.032527	MIC not significant	TRUE	FALSE	FALSE	FALSE	TRUE	FALSE	FALSE	FALSE
pcodonTCTAGC	3682	0.0763619	0.000232506	0.39	0.391	0.408633	0.401727	110	0.295109	0.0719984	0.073	0.663	0.0665395	0.68251	0.00459349	MIC not significant	FALSE	FALSE	FALSE	FALSE	FALSE	FALSE	FALSE	FALSE
pcodonTCTAGA	3682	0.0827661	0.00704378	0.049	0.572	0.0402823	0.598675	198	0.308281	0.0320462	0.000277228	0.00278218	2.11085e-06	0.000319167	0.0116218	Non-monotone	FALSE	TRUE	FALSE	FALSE	FALSE	TRUE	FALSE	FALSE
pcodonTCTAGG	3682	0.0858806	0.0072335	0.017	0.404	0.0119984	0.419336	283	0.191412	0.0309478	0.414	0.937	0.442293	0.924955	0.00298262	MIC not significant	FALSE	FALSE	FALSE	FALSE	TRUE	FALSE	FALSE	FALSE
pcodonTCTGTC	3682	0.0777421	0.00209444	0.32	0.517	0.322753	0.536414	184	0.248729	0.0214045	0.106	0.248	0.105346	0.273441	0.0475131	MIC not significant	FALSE	FALSE	FALSE	FALSE	FALSE	FALSE	FALSE	FALSE
pcodonTCTGTG	3682	0.0827535	0.0104476	0.089	0.956	0.0862639	0.948167	286	0.217229	0.0131251	0.037	0.113	0.03227	0.101677	0.0529466	MIC not significant	FALSE	FALSE	FALSE	FALSE	FALSE	FALSE	FALSE	FALSE
pcodonTCTGCT	3682	0.0845029	0.0102962	0.073	0.918	0.0623481	0.91088	337	0.201309	0.016793	0.123	0.361	0.123747	0.382354	0.0173069	MIC not significant	FALSE	FALSE	FALSE	FALSE	FALSE	FALSE	FALSE	FALSE
pcodonTCTGCC	3682	0.0792415	0.00328605	0.206	0.517	0.198256	0.527228	186	0.209279	0.0456349	0.549	0.98	0.585168	0.970957	0.00341519	MIC not significant	FALSE	FALSE	FALSE	FALSE	FALSE	FALSE	FALSE	FALSE
pcodonTCTGCA	3682	0.0763265	0.00692137	0.453	0.987	0.466077	0.978426	153	0.295881	0.0617707	0.025	0.343	0.0106471	0.377622	0.00194977	MIC not significant	FALSE	FALSE	FALSE	FALSE	FALSE	TRUE	FALSE	FALSE
pcodonTCTGCG	3682	0.0830161	0.00578919	0.143	0.646	0.132155	0.66996	328	0.250241	0.0290664	0.002	0.019	9.838e-05	0.0146267	0.0019443	MIC not significant	FALSE	TRUE	FALSE	FALSE	FALSE	TRUE	FALSE	FALSE
pcodonTCTGAC	3682	0.0821044	0.00312464	0.013	0.1	0.00821634	0.0918989	88	0.370326	0.151363	0.013	0.769	0.00303126	0.783273	0.000179537	non-significant monotone/non-monotone	TRUE	TRUE	FALSE	FALSE	TRUE	TRUE	FALSE	FALSE
pcodonTCTGAA	3682	0.0792395	0.00393718	0.164	0.544	0.160772	0.564086	175	0.238894	0.0259876	0.301	0.603	0.313578	0.622542	0.0330693	MIC not significant	FALSE	FALSE	FALSE	FALSE	FALSE	FALSE	FALSE	FALSE
pcodonTCTGAG	3682	0.0776288	0.00133553	0.231	0.333	0.238544	0.360469	128	0.231956	0.0312462	0.606	0.883	0.638188	0.867084	0.0459331	MIC not significant	FALSE	FALSE	FALSE	FALSE	FALSE	FALSE	FALSE	FALSE
pcodonTCTGGT	3682	0.0886735	0.0103008	0.012	0.637	0.00471268	0.634537	403	0.211735	0.00444388	0.011	0.014	0.00486665	0.00750862	0.18169	Non-monotone	TRUE	TRUE	FALSE	FALSE	TRUE	TRUE	FALSE	FALSE
pcodonTCTGGC	3682	0.0800283	0.00167326	0.211	0.346	0.204878	0.338474	217	0.216049	0.0206269	0.254	0.523	0.272966	0.563107	0.0344796	MIC not significant	FALSE	FALSE	FALSE	FALSE	FALSE	FALSE	FALSE	FALSE
pcodonTCTGGA	3682	0.0821148	0.00571758	0.186	0.751	0.195331	0.763432	341	0.217814	0.0347837	0.019	0.372	0.012317	0.397408	0.000536597	MIC not significant	FALSE	FALSE	FALSE	FALSE	FALSE	TRUE	FALSE	FALSE
pcodonTCTGGG	3682	0.0891511	0.0138846	0.01	0.906	0.00708692	0.898931	424	0.192023	0.0282607	0.042	0.516	0.035868	0.547204	0.000508703	non-significant monotone/non-monotone	TRUE	FALSE	FALSE	FALSE	TRUE	FALSE	FALSE	FALSE
pcodonTCCTTT	3682	0.0818086	0.00372609	0.392	0.754	0.402419	0.759548	496	0.169956	0.0329977	0.214	0.97	0.226721	0.963868	4.71563e-05	MIC not significant	FALSE	FALSE	FALSE	FALSE	FALSE	FALSE	FALSE	FALSE
pcodonTCCTTC	3682	0.0794394	0.00015688	0.418	0.412	0.439387	0.426084	331	0.229614	0.0504649	0.012	0.569	0.00465417	0.589188	3.7168e-05	MIC not significant	FALSE	TRUE	FALSE	FALSE	FALSE	TRUE	FALSE	FALSE
pcodonTCCTTA	3682	0.0837021	0.00101568	0.187	0.243	0.198072	0.255866	444	0.231827	0.139714	0.000148515	1	1.34448e-06	1	3.60265e-16	MIC not significant	FALSE	TRUE	FALSE	FALSE	FALSE	TRUE	FALSE	FALSE
pcodonTCCTTG	3682	0.0822443	0.00243992	0.274	0.495	0.29683	0.523417	443	0.209749	0.00310862	0.003	0.002	0.000909317	0.000939875	0.241558	MIC not significant	FALSE	TRUE	FALSE	FALSE	FALSE	TRUE	FALSE	FALSE
pcodonTCCTCT	3682	0.0817181	0.00222638	0.162	0.342	0.165954	0.345078	284	0.185732	0.0258609	0.512	0.93	0.543545	0.90991	0.00661119	MIC not significant	FALSE	FALSE	FALSE	FALSE	FALSE	FALSE	FALSE	FALSE
pcodonTCCTCC	3682	0.0828614	0.00253601	0.063	0.181	0.0591025	0.181128	238	0.327903	0.133018	0	0.54772	4.42998e-10	0.57574	6.71533e-09	MIC not significant	FALSE	TRUE	FALSE	FALSE	FALSE	TRUE	FALSE	FALSE
pcodonTCCTCA	3682	0.0758628	0.000149898	0.536	0.519	0.535578	0.518845	157	0.205893	0.0327463	0.778	0.983	0.781183	0.964108	0.023326	MIC not significant	FALSE	FALSE	FALSE	FALSE	FALSE	FALSE	FALSE	FALSE
pcodonTCCTCG	3682	0.0811489	0.000507048	0.23	0.258	0.231692	0.251118	301	0.213861	0.0269246	0.087	0.466	0.0825427	0.495339	0.00431271	MIC not significant	FALSE	FALSE	FALSE	FALSE	FALSE	FALSE	FALSE	FALSE
pcodonTCCTAT	3682	0.0789953	1.25725e-05	0.275	0.249	0.270451	0.246365	214	0.201389	0.0374282	0.556	0.979	0.587237	0.959481	0.00450514	MIC not significant	FALSE	FALSE	FALSE	FALSE	FALSE	FALSE	FALSE	FALSE
pcodonTCCTAC	3682	0.0821797	0.00321868	0.023	0.114	0.0149458	0.115533	126	0.294735	0.137727	0.088	0.998	0.0756337	0.99412	1.88541e-05	MIC not significant	FALSE	FALSE	FALSE	FALSE	TRUE	FALSE	FALSE	FALSE
pcodonTCCTAA	3682	0.0744579	0.000397798	0.668	0.686	0.682113	0.698194	94	0.243744	0.00475549	0.519	0.434	0.548989	0.476192	0.508976	MIC not significant	FALSE	FALSE	FALSE	FALSE	FALSE	FALSE	FALSE	FALSE
pcodonTCCTAG	3682	0.0748449	0.000435237	0.634	0.664	0.652455	0.671127	155	0.300833	0.0276041	0.007	0.037	0.00287841	0.0246733	0.0388166	MIC not significant	FALSE	TRUE	FALSE	FALSE	FALSE	TRUE	FALSE	FALSE
pcodonTCCTGT	3682	0.081979	0.00851593	0.103	0.864	0.0899422	0.856959	239	0.23163	0.0101067	0.083	0.121	0.0713072	0.116134	0.121149	MIC not significant	FALSE	FALSE	FALSE	FALSE	FALSE	FALSE	FALSE	FALSE
pcodonTCCTGC	3682	0.082313	0.00132484	0.099	0.168	0.0947058	0.152175	253	0.233767	0.0332667	0.032	0.266	0.02078	0.299121	0.00360031	MIC not significant	FALSE	FALSE	FALSE	FALSE	FALSE	FALSE	FALSE	FALSE
pcodonTCCTGA	3682	0.0731663	6.47063e-06	0.876	0.856	0.869467	0.854131	219	0.282107	0.045604	0.001	0.041	5.80216e-05	0.0260824	0.0014782	MIC not significant	FALSE	TRUE	FALSE	FALSE	FALSE	TRUE	FALSE	FALSE
pcodonTCCTGG	3682	0.0743341	0.000409047	0.964	0.964	0.954689	0.958099	436	0.230722	0.0459672	0.000277228	0.124079	6.54247e-06	0.12228	6.28486e-06	MIC not significant	FALSE	TRUE	FALSE	FALSE	FALSE	TRUE	FALSE	FALSE
pcodonTCCCTT	3682	0.0736397	0.000225022	0.846	0.843	0.841185	0.840425	220	0.247448	0.0131203	0.022	0.054	0.0167569	0.0414988	0.0901007	MIC not significant	FALSE	FALSE	FALSE	FALSE	FALSE	TRUE	FALSE	FALSE
pcodonTCCCTC	3682	0.0775359	0.000723917	0.297	0.357	0.300587	0.367527	66	0.296327	0.0546629	0.377	0.737	0.435148	0.737211	0.058839	MIC not significant	FALSE	FALSE	FALSE	FALSE	FALSE	FALSE	FALSE	FALSE
pcodonTCCCTA	3682	0.0733202	7.83415e-06	0.789	0.765	0.797472	0.772839	97	0.255311	0.00808747	0.317	0.312	0.354053	0.329871	0.381027	MIC not significant	FALSE	FALSE	FALSE	FALSE	FALSE	FALSE	FALSE	FALSE
pcodonTCCCTG	3682	0.0732358	0.00101417	0.81	0.866	0.809252	0.873314	101	0.228835	0.0170871	0.521	0.594	0.564284	0.637033	0.192595	MIC not significant	FALSE	FALSE	FALSE	FALSE	FALSE	FALSE	FALSE	FALSE
pcodonTCCCCT	3682	0.0786188	0.00106779	0.288	0.374	0.294843	0.382108	203	0.26836	0.0384202	0.017	0.182	0.00810717	0.180956	0.00506744	MIC not significant	FALSE	FALSE	FALSE	FALSE	FALSE	TRUE	FALSE	FALSE
pcodonTCCCCC	3682	0.0775182	3.29854e-05	0.284	0.245	0.289294	0.252959	67	0.249394	0.046339	0.732	0.937	0.743741	0.910261	0.0802162	MIC not significant	FALSE	FALSE	FALSE	FALSE	FALSE	FALSE	FALSE	FALSE
pcodonTCCCCA	3682	0.0762369	0.00088639	0.527	0.648	0.560882	0.674092	52	0.202842	0.00604389	0.973	0.94	0.94038	0.90736	0.583822	MIC not significant	FALSE	FALSE	FALSE	FALSE	FALSE	FALSE	FALSE	FALSE
pcodonTCCCCG	3682	0.0786348	4.23887e-05	0.165	0.151	0.172927	0.15421	128	0.230389	0.00113261	0.608	0.529	0.635884	0.5618	0.70608	MIC not significant	FALSE	FALSE	FALSE	FALSE	FALSE	FALSE	FALSE	FALSE
pcodonTCCCAG	3682	0.0768228	4.02711e-05	0.397	0.361	0.425529	0.383591	57	0.275043	0.0563111	0.385	0.736	0.443228	0.74007	0.0755083	MIC not significant	FALSE	FALSE	FALSE	FALSE	FALSE	FALSE	FALSE	FALSE
pcodonTCCCGT	3682	0.0742797	0.000427746	0.671	0.69	0.680705	0.701145	100	0.302343	0.0349953	0.039	0.108	0.0245026	0.097081	0.0623677	MIC not significant	FALSE	FALSE	FALSE	FALSE	FALSE	FALSE	FALSE	FALSE
pcodonTCCCGA	3682	0.0741508	0.00147999	0.747	0.895	0.765754	0.884579	76	0.224819	0.061192	0.763	0.986	0.772735	0.973594	0.03121	MIC not significant	FALSE	FALSE	FALSE	FALSE	FALSE	FALSE	FALSE	FALSE
pcodonTCCCGG	3682	0.0757878	0.00205554	0.438	0.697	0.471445	0.711298	108	0.265933	0.0382616	0.293	0.619	0.304902	0.643637	0.0424805	MIC not significant	FALSE	FALSE	FALSE	FALSE	FALSE	FALSE	FALSE	FALSE
pcodonTCCATT	3682	0.0766914	0.000315308	0.711	0.715	0.720927	0.722364	303	0.24814	0.0722424	0.002	0.709	0.000216175	0.730756	2.06543e-06	MIC not significant	FALSE	TRUE	FALSE	FALSE	FALSE	TRUE	FALSE	FALSE
pcodonTCCATC	3682	0.077881	0.00070392	0.268	0.317	0.283375	0.33036	153	0.250038	0.0501069	0.234	0.801	0.224305	0.804163	0.00541089	MIC not significant	FALSE	FALSE	FALSE	FALSE	FALSE	FALSE	FALSE	FALSE
pcodonTCCATA	3682	0.073828	0.00028898	0.757	0.764	0.761601	0.763777	162	0.248927	0.113009	0.140089	0.999891	0.14199	0.998863	1.22239e-05	MIC not significant	FALSE	FALSE	FALSE	FALSE	FALSE	FALSE	FALSE	FALSE
pcodonTCCATG	3682	0.0779452	6.60493e-08	0.607	0.581	0.625336	0.598532	331	0.184422	0.0177702	0.495	0.846	0.525627	0.842419	0.0152269	MIC not significant	FALSE	FALSE	FALSE	FALSE	FALSE	FALSE	FALSE	FALSE
pcodonTCCACT	3682	0.0748849	0.00169514	0.627	0.783	0.63894	0.780366	171	0.280705	0.0433286	0.008	0.102	0.0024657	0.0965661	0.00629495	MIC not significant	FALSE	TRUE	FALSE	FALSE	FALSE	TRUE	FALSE	FALSE
pcodonTCCACC	3682	0.0831713	0.00377794	0.01	0.117	0.00899656	0.109479	144	0.227982	0.0471251	0.357	0.868	0.370171	0.870821	0.008961	MIC not significant	TRUE	FALSE	FALSE	FALSE	TRUE	FALSE	FALSE	FALSE
pcodonTCCACA	3682	0.0762789	2.65934e-05	0.517	0.466	0.560944	0.509273	48	0.283198	0.015234	0.611	0.601	0.653356	0.616554	0.402086	MIC not significant	FALSE	FALSE	FALSE	FALSE	FALSE	FALSE	FALSE	FALSE
pcodonTCCACG	3682	0.0822182	0.00301928	0.078	0.249	0.0712801	0.254382	222	0.251833	0.107314	0.019	0.995	0.00709739	0.99278	5.981e-07	MIC not significant	FALSE	FALSE	FALSE	FALSE	FALSE	TRUE	FALSE	FALSE
pcodonTCCAAT	3682	0.0786874	0.000521051	0.159	0.181	0.155066	0.175094	100	0.251564	0.0221125	0.302	0.434	0.32775	0.468347	0.139795	MIC not significant	FALSE	FALSE	FALSE	FALSE	FALSE	FALSE	FALSE	FALSE
pcodonTCCAAC	3682	0.0730158	1.32461e-06	0.914	0.89	0.89473	0.87401	72	0.331929	0.170721	0.077	0.993	0.0642657	0.981404	0.00030948	MIC not significant	FALSE	FALSE	FALSE	FALSE	FALSE	FALSE	FALSE	FALSE
pcodonTCCAAA	3682	0.0755452	1.45268e-05	0.667	0.618	0.684033	0.642252	53	0.297578	0.0361832	0.317	0.463	0.375792	0.49455	0.172477	MIC not significant	FALSE	FALSE	FALSE	FALSE	FALSE	FALSE	FALSE	FALSE
pcodonTCCAAG	3682	0.0849727	0.00780636	0.013	0.489	0.0125848	0.50099	238	0.232944	0.0443771	0.09	0.697	0.0807284	0.707461	0.00107722	MIC not significant	TRUE	FALSE	FALSE	FALSE	TRUE	FALSE	FALSE	FALSE
pcodonTCCAGT	3682	0.0721423	0.00158379	0.891	0.954	0.87836	0.945999	141	0.248893	0.0144045	0.194	0.266	0.203763	0.280726	0.156311	MIC not significant	FALSE	FALSE	FALSE	FALSE	FALSE	FALSE	FALSE	FALSE
pcodonTCCAGC	3682	0.0812735	0.00307035	0.052	0.219	0.0484938	0.220265	153	0.264094	0.085547	0.127	0.973	0.113089	0.961192	0.000243767	MIC not significant	FALSE	FALSE	FALSE	FALSE	FALSE	FALSE	FALSE	FALSE
pcodonTCCAGA	3682	0.072824	0.000788379	0.824	0.865	0.817862	0.860462	127	0.248388	0.0589924	0.417	0.965	0.453211	0.939264	0.00593372	MIC not significant	FALSE	FALSE	FALSE	FALSE	FALSE	FALSE	FALSE	FALSE
pcodonTCCAGG	3682	0.081872	0.00158219	0.103	0.194	0.106718	0.194755	253	0.203766	0.040767	0.289	0.929	0.301407	0.910222	0.00124239	MIC not significant	FALSE	FALSE	FALSE	FALSE	FALSE	FALSE	FALSE	FALSE
pcodonTCCGTC	3682	0.0851971	0.00211256	0.002	0.01	0.00139488	0.00777429	127	0.295253	0.0455915	0.045	0.263	0.0339269	0.288266	0.0159376	non-significant monotone/non-monotone	TRUE	FALSE	FALSE	FALSE	TRUE	FALSE	FALSE	FALSE
pcodonTCCGTG	3682	0.0765154	9.11145e-05	0.421	0.401	0.448138	0.426899	150	0.263504	0.0397803	0.147	0.514	0.141139	0.554613	0.0144068	MIC not significant	FALSE	FALSE	FALSE	FALSE	FALSE	FALSE	FALSE	FALSE
pcodonTCCGCT	3682	0.0756768	0.000798958	0.623	0.672	0.638955	0.697389	204	0.218384	0.0421891	0.39	0.952	0.433272	0.93039	0.00320709	MIC not significant	FALSE	FALSE	FALSE	FALSE	FALSE	FALSE	FALSE	FALSE
pcodonTCCGCC	3682	0.0816268	0.000594469	0.036	0.05	0.0322384	0.0400038	151	0.240183	0.10064	0.360644	0.999891	0.394243	0.999165	7.22037e-05	MIC not significant	FALSE	FALSE	FALSE	FALSE	FALSE	FALSE	FALSE	FALSE
pcodonTCCGCA	3682	0.0758976	8.34357e-06	0.467	0.425	0.49965	0.456827	83	0.279547	0.0133495	0.421	0.442	0.456472	0.467507	0.298273	MIC not significant	FALSE	FALSE	FALSE	FALSE	FALSE	FALSE	FALSE	FALSE
pcodonTCCGCG	3682	0.0760136	9.89473e-05	0.68	0.662	0.687308	0.671176	265	0.244052	0.0489211	0.016	0.466	0.00923327	0.490879	0.000284972	MIC not significant	FALSE	FALSE	FALSE	FALSE	FALSE	TRUE	FALSE	FALSE
pcodonTCCGAA	3682	0.0749714	2.92382e-05	0.587	0.549	0.610568	0.573665	97	0.286191	0.0511979	0.103	0.39	0.10045	0.446659	0.0258409	MIC not significant	FALSE	FALSE	FALSE	FALSE	FALSE	FALSE	FALSE	FALSE
pcodonTCCGAG	3682	0.076412	9.72428e-05	0.425	0.392	0.43597	0.406571	78	0.273875	0.0851729	0.235	0.885	0.255403	0.87082	0.00952573	MIC not significant	FALSE	FALSE	FALSE	FALSE	FALSE	FALSE	FALSE	FALSE
pcodonTCCGGT	3682	0.080634	0.00152439	0.187	0.314	0.200511	0.321926	254	0.233384	0.0190039	0.032	0.096	0.0185436	0.0935165	0.0280416	MIC not significant	FALSE	FALSE	FALSE	FALSE	FALSE	FALSE	FALSE	FALSE
pcodonTCCGGC	3682	0.0787243	0.000196983	0.187	0.181	0.195518	0.187021	156	0.235534	0.0675964	0.372	0.987	0.420707	0.975533	0.00104638	MIC not significant	FALSE	FALSE	FALSE	FALSE	FALSE	FALSE	FALSE	FALSE
pcodonTCCGGA	3682	0.0745728	8.34922e-05	0.801	0.78	0.79589	0.780475	234	0.255383	0.128305	0.0174752	0.99999	0.00812883	0.999837	1.71817e-08	MIC not significant	FALSE	FALSE	FALSE	FALSE	FALSE	TRUE	FALSE	FALSE
pcodonTCCGGG	3682	0.0738656	0.00174427	0.844	0.932	0.846859	0.927967	237	0.197762	0.0113546	0.599	0.741	0.622753	0.747488	0.10175	MIC not significant	FALSE	FALSE	FALSE	FALSE	FALSE	FALSE	FALSE	FALSE
pcodonTCATTT	3682	0.0948971	0.0166858	2e-05	0.55493	3.37759e-06	0.56716	336	0.239317	0.0233182	0.002	0.025	0.000402244	0.0165256	0.00502961	Non-monotone	TRUE	TRUE	FALSE	FALSE	TRUE	TRUE	FALSE	FALSE
pcodonTCATTC	3682	0.0801148	0.00578997	0.153	0.728	0.151755	0.731166	188	0.215484	0.0504277	0.399	0.977	0.436963	0.965439	0.00194726	MIC not significant	FALSE	FALSE	FALSE	FALSE	FALSE	FALSE	FALSE	FALSE
pcodonTCATTA	3682	0.080223	0.00480562	0.17	0.635	0.1708	0.637491	215	0.22885	0.0233173	0.13	0.389	0.136958	0.41732	0.0251483	MIC not significant	FALSE	FALSE	FALSE	FALSE	FALSE	FALSE	FALSE	FALSE
pcodonTCATTG	3682	0.0800802	0.00950348	0.292	0.984	0.286642	0.980323	265	0.228949	0.0133865	0.085	0.148	0.0632151	0.153294	0.0599889	MIC not significant	FALSE	FALSE	FALSE	FALSE	FALSE	FALSE	FALSE	FALSE
pcodonTCATCT	3682	0.0804032	0.00507523	0.084	0.543	0.0865106	0.559845	163	0.229083	0.0157691	0.348	0.486	0.369243	0.511775	0.110215	MIC not significant	FALSE	FALSE	FALSE	FALSE	FALSE	FALSE	FALSE	FALSE
pcodonTCATCC	3682	0.0718711	0.0011598	0.956	0.98	0.947512	0.976619	76	0.285956	0.0704526	0.203	0.704	0.208917	0.728051	0.0204852	MIC not significant	FALSE	FALSE	FALSE	FALSE	FALSE	FALSE	FALSE	FALSE
pcodonTCATCA	3682	0.0788725	0.00121812	0.128	0.208	0.123393	0.233206	57	0.240814	2.42673e-05	0.653	0.537	0.689386	0.566949	0.970989	MIC not significant	FALSE	FALSE	FALSE	FALSE	FALSE	FALSE	FALSE	FALSE
pcodonTCATCG	3682	0.0782168	0.00770109	0.185	0.972	0.191642	0.958076	114	0.332644	0.00353508	0.006	0.004	0.00202818	0.00118753	0.529753	MIC not significant	FALSE	TRUE	FALSE	FALSE	FALSE	TRUE	FALSE	FALSE
pcodonTCATAT	3682	0.0813134	0.00771715	0.064	0.739	0.0526954	0.750405	151	0.280736	0.00312655	0.07	0.05	0.0458691	0.034312	0.495286	MIC not significant	FALSE	FALSE	FALSE	FALSE	FALSE	FALSE	FALSE	FALSE
pcodonTCATAC	3682	0.0780726	0.0019388	0.201	0.437	0.204759	0.455777	64	0.304504	0.0294192	0.346	0.457	0.396815	0.500389	0.174961	MIC not significant	FALSE	FALSE	FALSE	FALSE	FALSE	FALSE	FALSE	FALSE
pcodonTCATAA	3682	0.0759114	0.00433137	0.487	0.964	0.513085	0.956303	72	0.334206	0.109798	0.076	0.718	0.0564103	0.717454	0.00446546	MIC not significant	FALSE	FALSE	FALSE	FALSE	FALSE	FALSE	FALSE	FALSE
pcodonTCATAG	3682	0.0822289	0.00261162	0.019	0.081	0.0124655	0.0759895	107	0.298553	0.0202587	0.103	0.162	0.0948447	0.162475	0.143613	MIC not significant	FALSE	FALSE	FALSE	FALSE	TRUE	FALSE	FALSE	FALSE
pcodonTCATGT	3682	0.0823173	0.00730689	0.021	0.571	0.0154679	0.577627	139	0.244225	0.0232956	0.263	0.461	0.282618	0.489102	0.0728543	MIC not significant	FALSE	FALSE	FALSE	FALSE	FALSE	FALSE	FALSE	FALSE
pcodonTCATGC	3682	0.0750974	0.000374989	0.607	0.62	0.622744	0.639759	78	0.341753	0.100033	0.029	0.417	0.0142947	0.458809	0.0047871	MIC not significant	FALSE	FALSE	FALSE	FALSE	FALSE	TRUE	FALSE	FALSE
pcodonTCATGA	3682	0.0857729	0.00491635	0.00151485	0.0453564	0.000536863	0.0387182	130	0.26931	0.123464	0.178	0.999	0.173567	0.997607	4.14794e-05	MIC not significant	TRUE	FALSE	FALSE	FALSE	TRUE	FALSE	FALSE	FALSE
pcodonTCATGG	3682	0.0762377	0.00210478	0.497	0.707	0.482057	0.706782	160	0.205324	0.00479525	0.731	0.715	0.74787	0.729383	0.384246	MIC not significant	FALSE	FALSE	FALSE	FALSE	FALSE	FALSE	FALSE	FALSE
pcodonTCACTT	3682	0.079066	0.00459833	0.241	0.719	0.26262	0.726453	209	0.282951	0.0841134	0.001	0.624	0.000811941	0.647761	2.04811e-05	MIC not significant	FALSE	TRUE	FALSE	FALSE	FALSE	TRUE	FALSE	FALSE
pcodonTCACTC	3682	0.0771304	0.00168322	0.326	0.569	0.357579	0.594951	66	0.278488	0.00136839	0.474	0.371	0.524983	0.404063	0.768084	MIC not significant	FALSE	FALSE	FALSE	FALSE	FALSE	FALSE	FALSE	FALSE
pcodonTCACTA	3682	0.0729827	0.00209961	0.819	0.944	0.82124	0.938305	118	0.269818	0.0427308	0.138	0.435	0.130059	0.473802	0.0247101	MIC not significant	FALSE	FALSE	FALSE	FALSE	FALSE	FALSE	FALSE	FALSE
pcodonTCACTG	3682	0.0843114	0.00435459	0.00427184	0.0695825	0.00194412	0.063013	120	0.248851	0.00553769	0.244	0.222	0.275613	0.243425	0.419222	MIC not significant	TRUE	FALSE	FALSE	FALSE	TRUE	FALSE	FALSE	FALSE
pcodonTCACCT	3682	0.0739553	0.00423902	0.728	0.965	0.724759	0.967623	149	0.284744	0.028519	0.051	0.152	0.0344304	0.153713	0.0395096	MIC not significant	FALSE	FALSE	FALSE	FALSE	FALSE	FALSE	FALSE	FALSE
pcodonTCACCC	3682	0.0721123	0.000809621	0.957	0.979	0.948751	0.967638	70	0.281361	0.0302108	0.353	0.5	0.405581	0.53604	0.150146	MIC not significant	FALSE	FALSE	FALSE	FALSE	FALSE	FALSE	FALSE	FALSE
pcodonTCACCA	3682	0.0779709	0.00285895	0.212	0.577	0.204033	0.600092	72	0.383918	0.0734325	0.013	0.093	0.00326877	0.0839818	0.0213128	MIC not significant	FALSE	TRUE	FALSE	FALSE	FALSE	TRUE	FALSE	FALSE
pcodonTCACCG	3682	0.0769053	0.00598321	0.369	0.94	0.37062	0.937145	153	0.240623	0.00319511	0.324	0.281	0.355689	0.309372	0.487682	MIC not significant	FALSE	FALSE	FALSE	FALSE	FALSE	FALSE	FALSE	FALSE
pcodonTCACGT	3682	0.0840672	0.00777684	0.006	0.371	0.00333801	0.3896	139	0.249502	0.0584163	0.222	0.858	0.231246	0.855844	0.00415129	MIC not significant	TRUE	FALSE	FALSE	FALSE	TRUE	FALSE	FALSE	FALSE
pcodonTCACGC	3682	0.0754561	0.000832384	0.747	0.872	0.771794	0.864261	40	0.465734	0.176417	0.006	0.253	0.001025	0.284172	0.00697017	MIC not significant	FALSE	TRUE	FALSE	FALSE	FALSE	TRUE	FALSE	FALSE
pcodonTCACGA	3682	0.0798089	0.00228851	0.086	0.235	0.0782181	0.237195	102	0.362264	0.0492881	0.004	0.06	0.0021658	0.0424676	0.0249217	MIC not significant	FALSE	TRUE	FALSE	FALSE	FALSE	TRUE	FALSE	FALSE
pcodonTCACGG	3682	0.0830766	0.00746388	0.008	0.442	0.00415041	0.465517	103	0.293334	0.0503737	0.169	0.536	0.181626	0.581298	0.022656	MIC not significant	TRUE	FALSE	FALSE	FALSE	TRUE	FALSE	FALSE	FALSE
pcodonTCAATT	3682	0.0893143	0.00596422	0.00202041	0.0731939	0.000926466	0.0684358	292	0.208355	0.0119871	0.201	0.337	0.220696	0.379482	0.0616939	MIC not significant	TRUE	FALSE	FALSE	FALSE	TRUE	FALSE	FALSE	FALSE
pcodonTCAATC	3682	0.0760698	0.00217757	0.439	0.697	0.468231	0.705889	127	0.241334	0.04205	0.499	0.906	0.53534	0.888749	0.0207388	MIC not significant	FALSE	FALSE	FALSE	FALSE	FALSE	FALSE	FALSE	FALSE
pcodonTCAATA	3682	0.0764977	0.00211693	0.402	0.629	0.406042	0.640574	134	0.299886	0.0392372	0.026	0.13	0.0132448	0.129552	0.0217741	MIC not significant	FALSE	FALSE	FALSE	FALSE	FALSE	TRUE	FALSE	FALSE
pcodonTCAATG	3682	0.0820755	0.00467205	0.125	0.534	0.125436	0.532611	261	0.237374	0.0462273	0.05	0.611	0.0335135	0.63657	0.000469037	MIC not significant	FALSE	FALSE	FALSE	FALSE	FALSE	FALSE	FALSE	FALSE
pcodonTCAACT	3682	0.0780384	0.00478217	0.221	0.762	0.237893	0.767949	136	0.32129	0.0595499	0.01	0.109	0.00159188	0.109027	0.00419673	MIC not significant	FALSE	TRUE	FALSE	FALSE	FALSE	TRUE	FALSE	FALSE
pcodonTCAACC	3682	0.0789176	0.000585625	0.127	0.141	0.123711	0.14989	78	0.314878	0.0406297	0.065	0.14	0.052159	0.158913	0.0767817	MIC not significant	FALSE	FALSE	FALSE	FALSE	FALSE	FALSE	FALSE	FALSE
pcodonTCAACA	3682	0.0749657	0.00373955	0.662	0.976	0.663492	0.965828	74	0.255114	0.0280057	0.478	0.63	0.534075	0.6643	0.154112	MIC not significant	FALSE	FALSE	FALSE	FALSE	FALSE	FALSE	FALSE	FALSE
pcodonTCAACG	3682	0.076143	0.000577091	0.431	0.464	0.448485	0.484084	126	0.266463	0.030606	0.237	0.489	0.260976	0.530077	0.0500745	MIC not significant	FALSE	FALSE	FALSE	FALSE	FALSE	FALSE	FALSE	FALSE
pcodonTCAAAT	3682	0.0768489	0.00282044	0.338	0.672	0.336709	0.675616	108	0.31807	0.123356	0.038	0.928	0.0222428	0.909712	0.00019379	MIC not significant	FALSE	FALSE	FALSE	FALSE	FALSE	FALSE	FALSE	FALSE
pcodonTCAAAC	3682	0.075701	0.000242726	0.482	0.476	0.500915	0.497118	86	0.404097	0.0688955	0.003	0.038	0.000236959	0.019676	0.0146268	MIC not significant	FALSE	TRUE	FALSE	FALSE	FALSE	TRUE	FALSE	FALSE
pcodonTCAAAA	3682	0.0781773	0.00577747	0.187	0.947	0.201266	0.93352	65	0.290441	0.0467888	0.44	0.728	0.475115	0.717006	0.083516	MIC not significant	FALSE	FALSE	FALSE	FALSE	FALSE	FALSE	FALSE	FALSE
pcodonTCAAAG	3682	0.0750465	0.000459571	0.574	0.604	0.586112	0.611908	133	0.295046	0.0133443	0.032	0.039	0.02206	0.0336867	0.185479	MIC not significant	FALSE	FALSE	FALSE	FALSE	FALSE	FALSE	FALSE	FALSE
pcodonTCAAGT	3682	0.08041	0.00486412	0.064	0.479	0.0605506	0.488553	136	0.3282	0.00216566	0.00340594	0.00206931	0.000447813	0.00021051	0.590585	MIC not significant	FALSE	TRUE	FALSE	FALSE	FALSE	TRUE	FALSE	FALSE
pcodonTCAAGC	3682	0.0767523	0.00116749	0.379	0.501	0.389781	0.528465	72	0.298275	0.00860109	0.214	0.175	0.244304	0.19631	0.438433	MIC not significant	FALSE	FALSE	FALSE	FALSE	FALSE	FALSE	FALSE	FALSE
pcodonTCAAGA	3682	0.0767742	0.000463823	0.359	0.373	0.360538	0.384615	114	0.26101	0.111212	0.251	0.998	0.268559	0.996458	0.000288108	MIC not significant	FALSE	FALSE	FALSE	FALSE	FALSE	FALSE	FALSE	FALSE
pcodonTCAAGG	3682	0.0783226	0.00301052	0.229	0.532	0.223688	0.542682	152	0.282853	0.0661409	0.043	0.631	0.0368558	0.64756	0.00138138	MIC not significant	FALSE	FALSE	FALSE	FALSE	FALSE	FALSE	FALSE	FALSE
pcodonTCAGTC	3682	0.0738712	0.00211663	0.784	0.943	0.790642	0.936104	86	0.412457	0.13808	0.00221875	0.270167	0.000101536	0.299301	0.000427361	MIC not significant	FALSE	TRUE	FALSE	FALSE	FALSE	TRUE	FALSE	FALSE
pcodonTCAGTG	3682	0.0742339	0.00737055	0.653	0.999	0.680852	0.997332	127	0.271437	0.0118565	0.179	0.216	0.18894	0.223993	0.222998	MIC not significant	FALSE	FALSE	FALSE	FALSE	FALSE	FALSE	FALSE	FALSE
pcodonTCAGCT	3682	0.0844778	0.0101364	0.007	0.635	0.00302809	0.644129	141	0.274643	0.0109665	0.054	0.066	0.037866	0.0502058	0.216523	MIC not significant	TRUE	FALSE	FALSE	FALSE	TRUE	FALSE	FALSE	FALSE
pcodonTCAGCC	3682	0.0752244	0.00356695	0.547	0.918	0.571633	0.902303	114	0.233181	0.0732563	0.548	0.996	0.576615	0.985556	0.0035847	MIC not significant	FALSE	FALSE	FALSE	FALSE	FALSE	FALSE	FALSE	FALSE
pcodonTCAGCA	3682	0.0792068	0.00618527	0.11	0.851	0.108133	0.847137	81	0.23948	0.0168513	0.484	0.541	0.538416	0.582762	0.248071	MIC not significant	FALSE	FALSE	FALSE	FALSE	FALSE	FALSE	FALSE	FALSE
pcodonTCAGCG	3682	0.0818209	0.00208412	0.038	0.099	0.0310775	0.0976354	140	0.280861	0.00254385	0.052	0.036	0.0296746	0.0194543	0.553984	MIC not significant	FALSE	FALSE	FALSE	FALSE	FALSE	FALSE	FALSE	FALSE
pcodonTCAGAC	3682	0.0790992	0.00355996	0.082	0.684	0.0606725	0.7157	40	0.236225	0.129639	0.772208	0.998574	0.773421	0.994337	0.0224826	MIC not significant	FALSE	FALSE	FALSE	FALSE	FALSE	FALSE	FALSE	FALSE
pcodonTCAGAA	3682	0.0756505	0.00227096	0.549	0.843	0.576793	0.846235	69	0.272903	0.00436386	0.459	0.376	0.509447	0.416511	0.589682	MIC not significant	FALSE	FALSE	FALSE	FALSE	FALSE	FALSE	FALSE	FALSE
pcodonTCAGAG	3682	0.0759055	0.00131829	0.639	0.839	0.67317	0.840002	47	0.294536	0.0330254	0.566	0.677	0.609686	0.701477	0.221506	MIC not significant	FALSE	FALSE	FALSE	FALSE	FALSE	FALSE	FALSE	FALSE
pcodonTCAGGT	3682	0.0827487	0.00531042	0.031	0.321	0.0273791	0.337895	178	0.225616	0.0735168	0.407	0.999	0.447139	0.993294	0.000251441	MIC not significant	FALSE	FALSE	FALSE	FALSE	FALSE	FALSE	FALSE	FALSE
pcodonTCAGGC	3682	0.0755597	0.00239691	0.511	0.769	0.531715	0.780126	129	0.287516	0.0482908	0.103	0.404	0.0786303	0.449605	0.01234	MIC not significant	FALSE	FALSE	FALSE	FALSE	FALSE	FALSE	FALSE	FALSE
pcodonTCAGGA	3682	0.0811362	0.00597719	0.094	0.608	0.089492	0.632185	187	0.234708	0.0683985	0.189	0.97	0.195107	0.957547	0.000299726	MIC not significant	FALSE	FALSE	FALSE	FALSE	FALSE	FALSE	FALSE	FALSE
pcodonTCAGGG	3682	0.0838703	0.00911498	0.017	0.669	0.0144322	0.681207	192	0.228139	0.0882994	0.193535	0.999703	0.205607	0.997312	2.84526e-05	MIC not significant	FALSE	FALSE	FALSE	FALSE	TRUE	FALSE	FALSE	FALSE
pcodonTCGTTT	3682	0.0922646	0.00191169	0.002	0.003	0.000424684	0.00191801	457	0.162368	0.00243008	0.574	0.57	0.596926	0.599225	0.292993	MIC not significant	TRUE	FALSE	FALSE	FALSE	TRUE	FALSE	FALSE	FALSE
pcodonTCGTTC	3682	0.085011	0.00111017	0.037	0.054	0.0258141	0.0436618	271	0.201005	0.0426548	0.33	0.973	0.366497	0.960158	0.00062354	MIC not significant	FALSE	FALSE	FALSE	FALSE	FALSE	FALSE	FALSE	FALSE
pcodonTCGTTA	3682	0.0783554	4.1162e-06	0.57	0.538	0.601273	0.571613	358	0.238724	0.0624778	0.001	0.569	0.00014074	0.602617	1.67553e-06	MIC not significant	FALSE	TRUE	FALSE	FALSE	FALSE	TRUE	FALSE	FALSE
pcodonTCGTTG	3682	0.0873651	0.0115784	0.032	0.931	0.0265673	0.915634	483	0.173668	0.0228802	0.218	0.819	0.228835	0.826245	0.000853237	MIC not significant	FALSE	FALSE	FALSE	FALSE	FALSE	FALSE	FALSE	FALSE
pcodonTCGTCT	3682	0.0896441	0.00540868	0.002	0.077	0.00180988	0.0713409	359	0.207754	0.0123715	0.047	0.143	0.0447713	0.142099	0.035148	non-significant monotone/non-monotone	TRUE	FALSE	FALSE	FALSE	TRUE	FALSE	FALSE	FALSE
pcodonTCGTCC	3682	0.0836411	1.60971e-05	0.037	0.034	0.0324178	0.0268086	220	0.208268	0.0382448	0.347	0.92	0.380928	0.904515	0.00358761	MIC not significant	FALSE	FALSE	FALSE	FALSE	FALSE	FALSE	FALSE	FALSE
pcodonTCGTCA	3682	0.0744247	0.00105527	0.642	0.738	0.674054	0.752602	157	0.197409	0.00650635	0.863	0.863	0.844481	0.846071	0.315257	MIC not significant	FALSE	FALSE	FALSE	FALSE	FALSE	FALSE	FALSE	FALSE
pcodonTCGTCG	3682	0.0827608	0.000164327	0.204	0.189	0.194994	0.184453	392	0.223224	0.0536609	0.00128125	0.420687	0.000122925	0.449563	3.57027e-06	MIC not significant	FALSE	TRUE	FALSE	FALSE	FALSE	TRUE	FALSE	FALSE
pcodonTCGTAT	3682	0.0778513	0.00137548	0.452	0.571	0.458665	0.585835	245	0.243609	0.0690441	0.025	0.856	0.0142214	0.84733	3.10976e-05	MIC not significant	FALSE	FALSE	FALSE	FALSE	FALSE	TRUE	FALSE	FALSE
pcodonTCGTAC	3682	0.0754691	0.00159609	0.504	0.686	0.534646	0.69815	120	0.23025	0.0140922	0.451	0.529	0.495167	0.566794	0.196576	MIC not significant	FALSE	FALSE	FALSE	FALSE	FALSE	FALSE	FALSE	FALSE
pcodonTCGTAA	3682	0.0759065	0.00211957	0.457	0.695	0.462569	0.709859	109	0.22599	0.0096303	0.749	0.762	0.766043	0.769687	0.310015	MIC not significant	FALSE	FALSE	FALSE	FALSE	FALSE	FALSE	FALSE	FALSE
pcodonTCGTAG	3682	0.0815456	0.00490112	0.07	0.444	0.0666181	0.458783	200	0.210792	0.0190528	0.6	0.835	0.629116	0.826947	0.0512752	MIC not significant	FALSE	FALSE	FALSE	FALSE	FALSE	FALSE	FALSE	FALSE
pcodonTCGTGT	3682	0.0849185	0.00919567	0.027	0.712	0.0259788	0.724006	271	0.238994	0.0373922	0.02	0.269	0.0100154	0.288499	0.00137995	non-significant monotone/non-monotone	FALSE	FALSE	FALSE	FALSE	FALSE	TRUE	FALSE	FALSE
pcodonTCGTGC	3682	0.0814541	0.00126041	0.146	0.212	0.147359	0.224742	264	0.220787	0.0603934	0.124	0.977	0.125958	0.971735	5.43479e-05	MIC not significant	FALSE	FALSE	FALSE	FALSE	FALSE	FALSE	FALSE	FALSE
pcodonTCGTGA	3682	0.0782415	0.00144859	0.43	0.572	0.453853	0.587451	247	0.219835	0.0433472	0.123	0.806	0.122232	0.79861	0.000995966	MIC not significant	FALSE	FALSE	FALSE	FALSE	FALSE	FALSE	FALSE	FALSE
pcodonTCGTGG	3682	0.0795285	0.00109187	0.603	0.695	0.60943	0.697211	439	0.203316	0.0381642	0.016	0.539	0.00688429	0.574533	3.76775e-05	MIC not significant	FALSE	FALSE	FALSE	FALSE	FALSE	TRUE	FALSE	FALSE
pcodonTCGCTT	3682	0.0798795	7.11293e-05	0.524	0.498	0.529702	0.504132	419	0.199993	0.064391	0.021	0.998	0.0115853	0.988325	1.40099e-07	MIC not significant	FALSE	FALSE	FALSE	FALSE	FALSE	TRUE	FALSE	FALSE
pcodonTCGCTC	3682	0.0756605	6.85621e-06	0.484	0.452	0.49479	0.456246	112	0.241542	0.00164741	0.469	0.385	0.507269	0.421218	0.670908	MIC not significant	FALSE	FALSE	FALSE	FALSE	FALSE	FALSE	FALSE	FALSE
pcodonTCGCTA	3682	0.0816765	0.00435451	0.057	0.339	0.0551928	0.358389	188	0.183769	0.0290038	0.911	0.994	0.896764	0.987791	0.0194586	MIC not significant	FALSE	FALSE	FALSE	FALSE	FALSE	FALSE	FALSE	FALSE
pcodonTCGCTG	3682	0.0730244	0.000937684	0.886	0.912	0.877307	0.91253	196	0.239397	0.0567564	0.08	0.768	0.0733133	0.777691	0.00077235	MIC not significant	FALSE	FALSE	FALSE	FALSE	FALSE	FALSE	FALSE	FALSE
pcodonTCGCCT	3682	0.0774212	0.00153114	0.728	0.831	0.729223	0.836838	383	0.234547	0.069511	0.000534653	0.631109	1.54287e-05	0.652084	1.6429e-07	MIC not significant	FALSE	TRUE	FALSE	FALSE	FALSE	TRUE	FALSE	FALSE
pcodonTCGCCC	3682	0.0728692	0.00114534	0.821	0.902	0.827526	0.88921	132	0.257541	0.0550776	0.224	0.809	0.238897	0.802995	0.00675616	MIC not significant	FALSE	FALSE	FALSE	FALSE	FALSE	FALSE	FALSE	FALSE
pcodonTCGCCA	3682	0.0727985	8.08968e-05	0.841	0.812	0.829182	0.811313	120	0.204632	0.0112481	0.797	0.839	0.790657	0.828941	0.248956	MIC not significant	FALSE	FALSE	FALSE	FALSE	FALSE	FALSE	FALSE	FALSE
pcodonTCGCCG	3682	0.0830006	0.000627253	0.072	0.085	0.0702261	0.084381	254	0.169379	0.00417485	0.87	0.877	0.866852	0.865987	0.305007	MIC not significant	FALSE	FALSE	FALSE	FALSE	FALSE	FALSE	FALSE	FALSE
pcodonTCGCAG	3682	0.0736514	3.23293e-05	0.773	0.748	0.783726	0.759452	90	0.245869	0.0283926	0.603	0.776	0.618433	0.780044	0.112384	MIC not significant	FALSE	FALSE	FALSE	FALSE	FALSE	FALSE	FALSE	FALSE
pcodonTCGCGT	3682	0.0856763	0.0060836	0.012	0.197	0.00567115	0.209422	209	0.177606	0.00777762	0.944	0.962	0.927162	0.943426	0.20416	MIC not significant	TRUE	FALSE	FALSE	FALSE	TRUE	FALSE	FALSE	FALSE
pcodonTCGCGC	3682	0.0772397	0.0017395	0.275	0.493	0.303415	0.529268	72	0.240067	0.000968915	0.72	0.597	0.724328	0.621307	0.794796	MIC not significant	FALSE	FALSE	FALSE	FALSE	FALSE	FALSE	FALSE	FALSE
pcodonTCGCGA	3682	0.0734315	0.0015954	0.769	0.88	0.778755	0.880125	158	0.201745	0.0371752	0.831	0.99	0.818928	0.981885	0.0152183	MIC not significant	FALSE	FALSE	FALSE	FALSE	FALSE	FALSE	FALSE	FALSE
pcodonTCGCGG	3682	0.0814083	0.00398871	0.068	0.354	0.0693058	0.370319	189	0.189436	0.00484375	0.832	0.831	0.827507	0.828028	0.341295	MIC not significant	FALSE	FALSE	FALSE	FALSE	FALSE	FALSE	FALSE	FALSE
pcodonTCGATT	3682	0.0907748	2.74404e-05	0.013	0.01	0.0073462	0.00595277	663	0.193044	0.0783014	0.00021875	0.999812	4.74612e-06	0.998927	2.15788e-13	Monotone	TRUE	TRUE	FALSE	TRUE	TRUE	TRUE	FALSE	TRUE
pcodonTCGATC	3682	0.0802877	6.59511e-07	0.247	0.226	0.261324	0.23861	243	0.223452	0.0322951	0.108	0.559	0.101393	0.58013	0.00495657	MIC not significant	FALSE	FALSE	FALSE	FALSE	FALSE	FALSE	FALSE	FALSE
pcodonTCGATA	3682	0.0814805	0.000321702	0.161	0.157	0.161954	0.162494	280	0.197953	0.0256487	0.31	0.763	0.319573	0.778051	0.00724818	MIC not significant	FALSE	FALSE	FALSE	FALSE	FALSE	FALSE	FALSE	FALSE
pcodonTCGATG	3682	0.0828811	0.00363492	0.362	0.72	0.378589	0.726263	581	0.17103	0.0256264	0.046	0.671	0.0421867	0.691133	0.00010648	MIC not significant	FALSE	FALSE	FALSE	FALSE	FALSE	FALSE	FALSE	FALSE
pcodonTCGACT	3682	0.0812647	0.00505143	0.291	0.815	0.30367	0.812003	397	0.188578	0.0153886	0.205	0.52	0.213975	0.530792	0.0133811	MIC not significant	FALSE	FALSE	FALSE	FALSE	FALSE	FALSE	FALSE	FALSE
pcodonTCGACC	3682	0.0739749	0.000505684	0.879	0.899	0.873173	0.88609	273	0.245101	0.0356516	0.009	0.142	0.00230635	0.143126	0.0017263	MIC not significant	FALSE	TRUE	FALSE	FALSE	FALSE	TRUE	FALSE	FALSE
pcodonTCGACA	3682	0.0789548	0.000252638	0.193	0.195	0.196533	0.196079	160	0.222355	0.0600974	0.464	0.993	0.505087	0.977974	0.00178166	MIC not significant	FALSE	FALSE	FALSE	FALSE	FALSE	FALSE	FALSE	FALSE
pcodonTCGACG	3682	0.0843705	0.00159412	0.126	0.207	0.125091	0.216429	450	0.189601	0.0435711	0.036	0.927	0.0334087	0.918656	8.00909e-06	MIC not significant	FALSE	FALSE	FALSE	FALSE	FALSE	FALSE	FALSE	FALSE
pcodonTCGAAT	3682	0.0819244	0.00467175	0.066	0.406	0.0603354	0.409616	196	0.241547	0.0414361	0.063	0.49	0.0548246	0.516408	0.00421491	MIC not significant	FALSE	FALSE	FALSE	FALSE	FALSE	FALSE	FALSE	FALSE
pcodonTCGAAC	3682	0.0713528	0.000741975	0.943	0.969	0.937515	0.954086	175	0.316601	0.0214999	0.001	0.003	9.659e-05	0.00104149	0.052832	MIC not significant	FALSE	TRUE	FALSE	FALSE	FALSE	TRUE	FALSE	FALSE
pcodonTCGAAA	3682	0.0772133	0.00139535	0.297	0.427	0.306445	0.445013	143	0.249792	0.0431897	0.171	0.597	0.175742	0.637683	0.0127518	MIC not significant	FALSE	FALSE	FALSE	FALSE	FALSE	FALSE	FALSE	FALSE
pcodonTCGAAG	3682	0.0849381	0.00466968	0.15	0.57	0.150136	0.588262	528	0.173091	0.0342679	0.124	0.944	0.130317	0.934545	1.86384e-05	MIC not significant	FALSE	FALSE	FALSE	FALSE	FALSE	FALSE	FALSE	FALSE
pcodonTCGAGT	3682	0.075766	0.00129451	0.676	0.782	0.69394	0.784545	250	0.182214	0.0279371	0.757	0.988	0.758353	0.973159	0.00809245	MIC not significant	FALSE	FALSE	FALSE	FALSE	FALSE	FALSE	FALSE	FALSE
pcodonTCGAGC	3682	0.0816191	0.003169	0.102	0.333	0.103046	0.337909	225	0.236125	0.090354	0.05	0.999	0.032913	0.992659	4.42544e-06	MIC not significant	FALSE	FALSE	FALSE	FALSE	FALSE	FALSE	FALSE	FALSE
pcodonTCGAGA	3682	0.0769293	0.000516726	0.529	0.551	0.538394	0.56662	227	0.239228	0.0322609	0.022	0.22	0.0165252	0.237269	0.0066615	MIC not significant	FALSE	FALSE	FALSE	FALSE	FALSE	TRUE	FALSE	FALSE
pcodonTCGAGG	3682	0.0797625	6.96819e-05	0.531	0.506	0.532207	0.509796	421	0.227895	0.0900845	0.000260417	0.98999	7.05835e-06	0.979947	3.2667e-10	MIC not significant	FALSE	TRUE	FALSE	FALSE	FALSE	TRUE	FALSE	FALSE
pcodonTCGGTC	3682	0.0832789	0.000714558	0.044	0.057	0.0382537	0.0491992	224	0.225419	0.0208523	0.119	0.313	0.123882	0.346795	0.030736	MIC not significant	FALSE	FALSE	FALSE	FALSE	FALSE	FALSE	FALSE	FALSE
pcodonTCGGTG	3682	0.0890526	0.00481259	0.004	0.038	0.00115039	0.0406167	302	0.206817	0.000660193	0.14	0.114	0.14008	0.112593	0.656508	MIC not significant	TRUE	FALSE	FALSE	FALSE	TRUE	FALSE	FALSE	FALSE
pcodonTCGGCT	3682	0.0833496	0.00435541	0.174	0.562	0.169788	0.577319	404	0.201863	0.0145244	0.033	0.144	0.0272031	0.134995	0.0153633	MIC not significant	FALSE	FALSE	FALSE	FALSE	FALSE	FALSE	FALSE	FALSE
pcodonTCGGCC	3682	0.0815123	2.86133e-05	0.174	0.155	0.177758	0.158116	290	0.18876	0.0249064	0.635	0.963	0.658631	0.942327	0.00708498	MIC not significant	FALSE	FALSE	FALSE	FALSE	FALSE	FALSE	FALSE	FALSE
pcodonTCGGCA	3682	0.0780755	0.000370229	0.279	0.291	0.286613	0.297795	180	0.210615	0.000946272	0.647	0.554	0.662615	0.584062	0.681856	MIC not significant	FALSE	FALSE	FALSE	FALSE	FALSE	FALSE	FALSE	FALSE
pcodonTCGGCG	3682	0.0808999	2.43525e-05	0.464	0.434	0.483498	0.454916	482	0.208412	0.0466238	0.001	0.499	0.000386752	0.536747	1.71169e-06	MIC not significant	FALSE	TRUE	FALSE	FALSE	FALSE	TRUE	FALSE	FALSE
pcodonTCGGAC	3682	0.0833282	0.00493006	0.001	0.147	0.000479476	0.142982	57	0.19793	0.0359199	0.951	0.983	0.922154	0.962399	0.1576	MIC not significant	TRUE	FALSE	FALSE	FALSE	TRUE	FALSE	FALSE	FALSE
pcodonTCGGAA	3682	0.079913	0.00211551	0.15	0.291	0.140426	0.302954	180	0.31388	0.0403423	0.001	0.013	2.10297e-05	0.00495988	0.00685984	MIC not significant	FALSE	TRUE	FALSE	FALSE	FALSE	TRUE	FALSE	FALSE
pcodonTCGGAG	3682	0.0761581	0.00116531	0.428	0.557	0.447792	0.566991	118	0.331667	0.00578154	0.009	0.006	0.00138196	0.000908395	0.413151	MIC not significant	FALSE	TRUE	FALSE	FALSE	FALSE	TRUE	FALSE	FALSE
pcodonTCGGGT	3682	0.0934448	0.00806698	0.001	0.162	0.000735907	0.157924	643	0.158654	0.00828174	0.216	0.448	0.247921	0.481153	0.0210029	MIC not significant	TRUE	FALSE	FALSE	FALSE	TRUE	FALSE	FALSE	FALSE
pcodonTCGGGC	3682	0.083837	0.000352082	0.131	0.135	0.122405	0.126817	379	0.255699	0.0992058	2.08333e-05	0.86149	1.96006e-08	0.85561	3.56684e-10	MIC not significant	FALSE	TRUE	FALSE	FALSE	FALSE	TRUE	FALSE	FALSE
pcodonTCGGGA	3682	0.0777455	0.000679447	0.882	0.898	0.876741	0.897323	648	0.202959	0.0679035	1.9802e-05	0.922228	2.67415e-07	0.910406	1.61365e-11	MIC not significant	FALSE	TRUE	FALSE	FALSE	FALSE	TRUE	FALSE	FALSE
pcodonTCGGGG	3682	0.0808138	0.00398183	0.459	0.83	0.473818	0.831034	460	0.208457	0.0336956	0.003	0.158	0.000302606	0.153915	7.49531e-05	MIC not significant	FALSE	TRUE	FALSE	FALSE	FALSE	TRUE	FALSE	FALSE
pcodonTATTTT	3682	0.103422	0.0197478	0	0.362311	6.08907e-09	0.372601	761	0.145735	0.0163242	0.293	0.876	0.32286	0.867253	0.000410433	MIC not significant	TRUE	FALSE	FALSE	FALSE	TRUE	FALSE	FALSE	FALSE
pcodonTATTTC	3682	0.0827662	0.0010009	0.336	0.414	0.338304	0.414422	523	0.22306	0.0744305	9.90099e-06	0.783139	9.45098e-08	0.787921	2.22441e-10	MIC not significant	FALSE	TRUE	FALSE	FALSE	FALSE	TRUE	FALSE	FALSE
pcodonTATTTA	3682	0.0759008	0.000329216	0.968	0.972	0.953761	0.955829	651	0.206697	0.0643957	1.9802e-05	0.697168	2.45691e-08	0.710824	5.02852e-11	MIC not significant	FALSE	TRUE	FALSE	FALSE	FALSE	TRUE	FALSE	FALSE
pcodonTATTTG	3682	0.0901718	0.0104509	0.013	0.72	0.010473	0.720251	651	0.1617	0.0318755	0.106	0.98	0.106481	0.966143	4.57381e-06	MIC not significant	TRUE	FALSE	FALSE	FALSE	TRUE	FALSE	FALSE	FALSE
pcodonTATTCT	3682	0.0895273	0.00829681	0.004	0.25	0.00203326	0.25146	344	0.211371	0.0247097	0.035	0.26	0.0244447	0.278943	0.00346589	non-significant monotone/non-monotone	TRUE	FALSE	FALSE	FALSE	TRUE	FALSE	FALSE	FALSE
pcodonTATTCC	3682	0.0824729	5.63757e-05	0.086	0.077	0.0767176	0.0682005	227	0.215717	0.0410756	0.187	0.806	0.202649	0.811702	0.00215064	MIC not significant	FALSE	FALSE	FALSE	FALSE	FALSE	FALSE	FALSE	FALSE
pcodonTATTCA	3682	0.0723436	0.00178382	0.861	0.944	0.864712	0.944193	135	0.164076	0.0181311	1	0.999	0.990853	0.997283	0.119455	MIC not significant	FALSE	FALSE	FALSE	FALSE	FALSE	FALSE	FALSE	FALSE
pcodonTATTCG	3682	0.0852337	0.00057891	0.05	0.059	0.0520839	0.0602837	374	0.212228	0.0345605	0.018	0.375	0.00777406	0.393369	0.00030064	MIC not significant	FALSE	FALSE	FALSE	FALSE	FALSE	TRUE	FALSE	FALSE
pcodonTATTAT	3682	0.0786464	0.000365687	0.868	0.869	0.856873	0.862683	718	0.180696	0.0584062	0.002	0.985	6.69791e-05	0.974108	5.30906e-11	MIC not significant	FALSE	TRUE	FALSE	FALSE	FALSE	TRUE	FALSE	FALSE
pcodonTATTAC	3682	0.0861389	0.00594699	0.004	0.135	0.00242767	0.128222	194	0.233389	0.00115817	0.126	0.089	0.129686	0.0884823	0.637582	MIC not significant	TRUE	FALSE	FALSE	FALSE	TRUE	FALSE	FALSE	FALSE
pcodonTATTAA	3682	0.0842183	0.0126489	0.072	0.976	0.0625881	0.969522	314	0.208489	0.0540497	0.08	0.963	0.0692378	0.947105	3.17726e-05	MIC not significant	FALSE	FALSE	FALSE	FALSE	FALSE	FALSE	FALSE	FALSE
pcodonTATTAG	3682	0.0940898	0.0133478	9.90099e-06	0.237347	4.25289e-06	0.242696	302	0.195538	0.0195894	0.306	0.669	0.318441	0.698172	0.0149251	MIC not significant	TRUE	FALSE	FALSE	FALSE	TRUE	FALSE	FALSE	FALSE
pcodonTATTGT	3682	0.0921292	0.0192669	0.00077451	0.976412	0.000273468	0.970818	400	0.209457	0.011535	0.016	0.056	0.00867041	0.0392802	0.0317519	non-significant monotone/non-monotone	TRUE	FALSE	FALSE	FALSE	TRUE	TRUE	FALSE	FALSE
pcodonTATTGC	3682	0.0791003	0.000539613	0.429	0.452	0.451345	0.481493	315	0.244178	0.0600176	0.003	0.347	0.000150423	0.381978	1.09271e-05	MIC not significant	FALSE	TRUE	FALSE	FALSE	FALSE	TRUE	FALSE	FALSE
pcodonTATTGA	3682	0.0770307	0.00246693	0.731	0.9	0.733232	0.89274	359	0.230435	0.0439783	0.004	0.315	0.000822127	0.337145	6.22293e-05	MIC not significant	FALSE	TRUE	FALSE	FALSE	FALSE	TRUE	FALSE	FALSE
pcodonTATTGG	3682	0.0786819	0.00200781	0.815	0.912	0.800512	0.910836	597	0.205585	0.0531438	0.000227723	0.529663	3.30116e-06	0.554216	1.21382e-08	MIC not significant	FALSE	TRUE	FALSE	FALSE	FALSE	TRUE	FALSE	FALSE
pcodonTATCTT	3682	0.078672	0.000135691	0.724	0.716	0.736852	0.723281	496	0.183865	0.0380839	0.043	0.842	0.0294953	0.847894	1.20099e-05	MIC not significant	FALSE	FALSE	FALSE	FALSE	FALSE	FALSE	FALSE	FALSE
pcodonTATCTC	3682	0.0782637	3.06654e-05	0.189	0.17	0.200158	0.175776	130	0.258479	0.0836114	0.262	0.991	0.287294	0.978749	0.000848036	MIC not significant	FALSE	FALSE	FALSE	FALSE	FALSE	FALSE	FALSE	FALSE
pcodonTATCTA	3682	0.0771122	0.000177167	0.515	0.507	0.525296	0.515138	231	0.275525	0.044566	0.006	0.084	0.00049618	0.0917525	0.00124838	MIC not significant	FALSE	TRUE	FALSE	FALSE	FALSE	TRUE	FALSE	FALSE
pcodonTATCTG	3682	0.0832774	0.000293615	0.057	0.058	0.0526208	0.0526775	245	0.240023	0.0386631	0.018	0.336	0.0168162	0.352217	0.00198653	MIC not significant	FALSE	FALSE	FALSE	FALSE	FALSE	TRUE	FALSE	FALSE
pcodonTATCCT	3682	0.0790801	0.00111383	0.343	0.422	0.360974	0.452527	262	0.256867	0.0831447	0.006	0.879	0.00118483	0.88188	2.07273e-06	MIC not significant	FALSE	TRUE	FALSE	FALSE	FALSE	TRUE	FALSE	FALSE
pcodonTATCCC	3682	0.0790111	0.000305584	0.125	0.128	0.13641	0.136484	82	0.236432	0.0265574	0.861	0.936	0.843148	0.919355	0.143509	MIC not significant	FALSE	FALSE	FALSE	FALSE	FALSE	FALSE	FALSE	FALSE
pcodonTATCCA	3682	0.0781547	0.00139931	0.218	0.328	0.205252	0.328965	109	0.203678	0.004673	0.915	0.885	0.902549	0.882614	0.480007	MIC not significant	FALSE	FALSE	FALSE	FALSE	FALSE	FALSE	FALSE	FALSE
pcodonTATCCG	3682	0.0767257	1.67071e-05	0.556	0.532	0.553729	0.527448	227	0.235454	0.0545935	0.048	0.717	0.0307604	0.726389	0.000384991	MIC not significant	FALSE	FALSE	FALSE	FALSE	FALSE	FALSE	FALSE	FALSE
pcodonTATCAT	3682	0.0749891	0.00178679	0.743	0.926	0.756654	0.915446	54	0.293595	0.116456	0.344	0.978	0.374574	0.954484	0.0115586	MIC not significant	FALSE	FALSE	FALSE	FALSE	FALSE	FALSE	FALSE	FALSE
pcodonTATCAC	3682	0.0808569	0.000842627	0.031	0.049	0.0163672	0.0319642	47	0.433706	0.114086	0.038	0.29	0.0224858	0.327368	0.0206963	non-significant monotone/non-monotone	FALSE	FALSE	FALSE	FALSE	FALSE	FALSE	FALSE	FALSE
pcodonTATCAA	3682	0.0794165	0.00245218	0.049	0.323	0.039323	0.338711	42	0.258274	0.0514814	0.551	0.756	0.582784	0.753213	0.148459	MIC not significant	FALSE	FALSE	FALSE	FALSE	FALSE	FALSE	FALSE	FALSE
pcodonTATCAG	3682	0.0720862	0.000187756	0.882	0.878	0.884612	0.878768	124	0.232954	0.0282997	0.663	0.87	0.676814	0.867045	0.0618128	MIC not significant	FALSE	FALSE	FALSE	FALSE	FALSE	FALSE	FALSE	FALSE
pcodonTATCGT	3682	0.0772401	0.00286932	0.565	0.835	0.567714	0.824368	260	0.198924	0.0181529	0.549	0.836	0.577698	0.822715	0.0298597	MIC not significant	FALSE	FALSE	FALSE	FALSE	FALSE	FALSE	FALSE	FALSE
pcodonTATCGC	3682	0.077193	0.0031696	0.287	0.763	0.304677	0.765218	70	0.301569	0.0293614	0.221	0.332	0.233494	0.353066	0.156094	MIC not significant	FALSE	FALSE	FALSE	FALSE	FALSE	FALSE	FALSE	FALSE
pcodonTATCGA	3682	0.0744968	0.000560585	0.683	0.71	0.680022	0.709955	165	0.26368	0.0336216	0.052	0.199	0.0294683	0.218426	0.0184013	MIC not significant	FALSE	FALSE	FALSE	FALSE	FALSE	FALSE	FALSE	FALSE
pcodonTATCGG	3682	0.0768655	0.00481467	0.392	0.883	0.397694	0.878759	157	0.347555	0.104071	0.000268041	0.174608	2.89872e-06	0.183809	3.77908e-05	MIC not significant	FALSE	TRUE	FALSE	FALSE	FALSE	TRUE	FALSE	FALSE
pcodonTATATT	3682	0.0866721	0.00159883	0.153	0.249	0.161807	0.265878	798	0.148326	0.0400755	0.167485	0.99997	0.171216	0.999511	1.16974e-08	MIC not significant	FALSE	FALSE	FALSE	FALSE	FALSE	FALSE	FALSE	FALSE
pcodonTATATC	3682	0.0770065	7.46514e-07	0.756	0.735	0.757176	0.734319	375	0.196406	0.0617718	0.088	0.996	0.088522	0.994763	1.09607e-06	MIC not significant	FALSE	FALSE	FALSE	FALSE	FALSE	FALSE	FALSE	FALSE
pcodonTATATA	3682	0.0820477	0.00198403	0.224	0.376	0.230813	0.40372	375	0.213246	0.0644443	0.01	0.957	0.00651188	0.946964	6.31332e-07	MIC not significant	FALSE	TRUE	FALSE	FALSE	FALSE	TRUE	FALSE	FALSE
pcodonTATATG	3682	0.0916165	0.0123753	0.003	0.731	0.00284343	0.735165	591	0.183939	0.0359135	0.021	0.741	0.0114759	0.75886	3.49423e-06	non-significant monotone/non-monotone	TRUE	FALSE	FALSE	FALSE	TRUE	TRUE	FALSE	FALSE
pcodonTATACT	3682	0.0752014	0.00235369	0.848	0.955	0.836857	0.943851	303	0.191267	0.039382	0.388	0.985	0.420103	0.972615	0.000511381	MIC not significant	FALSE	FALSE	FALSE	FALSE	FALSE	FALSE	FALSE	FALSE
pcodonTATACC	3682	0.0745495	0.00094075	0.773	0.841	0.779105	0.833392	214	0.252525	0.0490646	0.017	0.403	0.0134077	0.435457	0.00110636	MIC not significant	FALSE	FALSE	FALSE	FALSE	FALSE	TRUE	FALSE	FALSE
pcodonTATACA	3682	0.0717901	0.00066775	0.916	0.937	0.911256	0.931811	95	0.327406	0.0839514	0.028	0.372	0.0135507	0.426461	0.00439882	MIC not significant	FALSE	FALSE	FALSE	FALSE	FALSE	TRUE	FALSE	FALSE
pcodonTATACG	3682	0.0823618	0.00303017	0.175	0.458	0.191374	0.461058	358	0.248759	0.0568202	0.0004375	0.225552	1.48139e-05	0.238799	5.10811e-06	MIC not significant	FALSE	TRUE	FALSE	FALSE	FALSE	TRUE	FALSE	FALSE
pcodonTATAAT	3682	0.0798206	0.00505298	0.188	0.669	0.181878	0.686505	190	0.237158	0.0136234	0.131	0.213	0.140558	0.234412	0.108772	MIC not significant	FALSE	FALSE	FALSE	FALSE	FALSE	FALSE	FALSE	FALSE
pcodonTATAAC	3682	0.0787202	0.000456404	0.233	0.246	0.224584	0.242027	177	0.310282	0.0925632	0.005	0.511	0.000600927	0.524142	3.83795e-05	MIC not significant	FALSE	TRUE	FALSE	FALSE	FALSE	TRUE	FALSE	FALSE
pcodonTATAAA	3682	0.077613	0.00142235	0.265	0.387	0.255842	0.409238	88	0.324828	0.184878	0.065	0.999	0.0504978	0.997656	2.90383e-05	MIC not significant	FALSE	FALSE	FALSE	FALSE	FALSE	FALSE	FALSE	FALSE
pcodonTATAAG	3682	0.0953202	0.00638066	3.8835e-05	0.00605825	5.09701e-06	0.00351434	389	0.222504	0.0368743	0.001	0.126	0.000297319	0.127327	0.000138578	non-significant monotone/non-monotone	TRUE	TRUE	FALSE	FALSE	TRUE	TRUE	FALSE	FALSE
pcodonTATAGT	3682	0.0756203	0.00653254	0.655	0.99	0.663688	0.98735	225	0.238021	0.034725	0.043	0.3	0.0262626	0.326061	0.00504368	MIC not significant	FALSE	FALSE	FALSE	FALSE	FALSE	FALSE	FALSE	FALSE
pcodonTATAGC	3682	0.0744292	0.000362893	0.713	0.719	0.737881	0.747061	190	0.225521	0.0273966	0.262	0.597	0.280931	0.634519	0.0224755	MIC not significant	FALSE	FALSE	FALSE	FALSE	FALSE	FALSE	FALSE	FALSE
pcodonTATAGA	3682	0.0757352	0.0036936	0.579	0.916	0.599144	0.898541	178	0.212273	0.0138819	0.654	0.768	0.674167	0.786357	0.117274	MIC not significant	FALSE	FALSE	FALSE	FALSE	FALSE	FALSE	FALSE	FALSE
pcodonTATAGG	3682	0.0802031	0.000236197	0.372	0.361	0.386031	0.38247	339	0.259978	0.056151	0.000114583	0.0746146	7.24375e-07	0.0658697	1.03474e-05	MIC not significant	FALSE	TRUE	FALSE	FALSE	FALSE	TRUE	FALSE	FALSE
pcodonTATGTC	3682	0.0752771	7.82556e-05	0.773	0.755	0.779978	0.762759	257	0.276209	0.100118	0.000158416	0.697624	2.86749e-06	0.712053	2.2009e-07	MIC not significant	FALSE	TRUE	FALSE	FALSE	FALSE	TRUE	FALSE	FALSE
pcodonTATGTG	3682	0.0973899	0.00937982	0	0.00485437	2.90236e-08	0.00257524	304	0.179945	0.00491241	0.694	0.716	0.693817	0.72683	0.223034	MIC not significant	TRUE	FALSE	FALSE	FALSE	TRUE	FALSE	FALSE	FALSE
pcodonTATGCT	3682	0.0836083	0.00605928	0.103	0.65	0.0985633	0.645766	342	0.225974	0.048151	0.003	0.478	0.00223847	0.512489	4.25508e-05	MIC not significant	FALSE	TRUE	FALSE	FALSE	FALSE	TRUE	FALSE	FALSE
pcodonTATGCC	3682	0.0764239	4.48453e-05	0.48	0.453	0.488024	0.462293	183	0.242213	0.0234738	0.154	0.355	0.153194	0.394123	0.0383919	MIC not significant	FALSE	FALSE	FALSE	FALSE	FALSE	FALSE	FALSE	FALSE
pcodonTATGCA	3682	0.0738906	0.00236204	0.71	0.907	0.728105	0.895274	144	0.302877	0.0814454	0.008	0.392	0.00190487	0.409912	0.000525943	MIC not significant	FALSE	TRUE	FALSE	FALSE	FALSE	TRUE	FALSE	FALSE
pcodonTATGCG	3682	0.078431	0.000343202	0.568	0.579	0.575041	0.582868	363	0.188874	0.041069	0.268	0.984	0.290754	0.975653	0.000100993	MIC not significant	FALSE	FALSE	FALSE	FALSE	FALSE	FALSE	FALSE	FALSE
pcodonTATGAC	3682	0.0793816	0.00145408	0.1	0.203	0.0979604	0.206703	68	0.319827	0.0655985	0.181	0.545	0.194489	0.58696	0.0350152	MIC not significant	FALSE	FALSE	FALSE	FALSE	FALSE	FALSE	FALSE	FALSE
pcodonTATGAA	3682	0.0805126	0.000822347	0.149	0.183	0.143019	0.18052	204	0.208665	0.0267049	0.538	0.89	0.582806	0.879272	0.0195209	MIC not significant	FALSE	FALSE	FALSE	FALSE	FALSE	FALSE	FALSE	FALSE
pcodonTATGAG	3682	0.0731184	0.00327577	0.79	0.971	0.800481	0.962992	144	0.238144	0.0687849	0.255	0.967	0.280302	0.941439	0.0014954	MIC not significant	FALSE	FALSE	FALSE	FALSE	FALSE	FALSE	FALSE	FALSE
pcodonTATGGT	3682	0.0853489	0.00361819	0.118	0.41	0.119185	0.404808	506	0.195287	0.0166548	0.001	0.034	0.000702227	0.0264395	0.00363779	MIC not significant	FALSE	TRUE	FALSE	FALSE	FALSE	TRUE	FALSE	FALSE
pcodonTATGGC	3682	0.0791578	1.54487e-05	0.383	0.364	0.397018	0.368582	283	0.221312	0.0246284	0.045	0.243	0.0315543	0.250649	0.00817466	MIC not significant	FALSE	FALSE	FALSE	FALSE	FALSE	FALSE	FALSE	FALSE
pcodonTATGGA	3682	0.0764211	8.17893e-05	0.852	0.836	0.845169	0.832726	426	0.203829	0.0487451	0.01	0.751	0.00327263	0.751942	4.21659e-06	MIC not significant	FALSE	TRUE	FALSE	FALSE	FALSE	TRUE	FALSE	FALSE
pcodonTATGGG	3682	0.0783239	0.0017654	0.734	0.863	0.74969	0.868504	475	0.188084	0.0379014	0.054	0.879	0.0458603	0.868767	1.93049e-05	MIC not significant	FALSE	FALSE	FALSE	FALSE	FALSE	FALSE	FALSE	FALSE
pcodonTACTTT	3682	0.0898181	0.0161269	0.013	0.959	0.00416767	0.954216	430	0.188004	0.0330683	0.126	0.898	0.137429	0.881317	0.000149716	MIC not significant	TRUE	FALSE	FALSE	FALSE	TRUE	FALSE	FALSE	FALSE
pcodonTACTTC	3682	0.0805505	0.00533144	0.265	0.798	0.26024	0.798662	279	0.22048	0.0304949	0.062	0.386	0.0505703	0.421325	0.00343038	MIC not significant	FALSE	FALSE	FALSE	FALSE	FALSE	FALSE	FALSE	FALSE
pcodonTACTTA	3682	0.0816664	0.00352073	0.162	0.435	0.158531	0.469836	275	0.238766	0.0686235	0.014	0.862	0.00601328	0.851334	1.07532e-05	MIC not significant	FALSE	TRUE	FALSE	FALSE	FALSE	TRUE	FALSE	FALSE
pcodonTACTTG	3682	0.0924935	0.0123696	0.001	0.449	0.000252225	0.449091	402	0.194167	0.0287093	0.085	0.642	0.0747964	0.674279	0.000646433	MIC not significant	TRUE	FALSE	FALSE	FALSE	TRUE	FALSE	FALSE	FALSE
pcodonTACTCT	3682	0.0795459	0.00416636	0.231	0.636	0.225451	0.6487	209	0.223695	0.020084	0.266	0.521	0.294076	0.559784	0.0406729	MIC not significant	FALSE	FALSE	FALSE	FALSE	FALSE	FALSE	FALSE	FALSE
pcodonTACTCC	3682	0.0793324	5.18427e-07	0.129	0.114	0.123648	0.106259	127	0.24222	0.0820701	0.496	0.998	0.528451	0.991699	0.00109367	MIC not significant	FALSE	FALSE	FALSE	FALSE	FALSE	FALSE	FALSE	FALSE
pcodonTACTCA	3682	0.0808504	0.00482685	0.039	0.408	0.0332011	0.425886	93	0.236274	0.0421021	0.619	0.904	0.651821	0.892704	0.0484904	MIC not significant	FALSE	FALSE	FALSE	FALSE	FALSE	FALSE	FALSE	FALSE
pcodonTACTCG	3682	0.0768425	0.00576371	0.45	0.951	0.469753	0.94584	197	0.270512	0.0589267	0.008	0.251	0.00121787	0.271342	0.000588185	MIC not significant	FALSE	TRUE	FALSE	FALSE	FALSE	TRUE	FALSE	FALSE
pcodonTACTAT	3682	0.081971	0.00636599	0.04	0.511	0.0339334	0.530912	166	0.233401	0.0319196	0.242	0.612	0.259998	0.639413	0.0212761	MIC not significant	FALSE	FALSE	FALSE	FALSE	FALSE	FALSE	FALSE	FALSE
pcodonTACTAC	3682	0.0793804	0.00479602	0.146	0.644	0.147336	0.657464	161	0.313806	0.0307392	0.003	0.013	0.000409275	0.00701065	0.0261106	MIC not significant	FALSE	TRUE	FALSE	FALSE	FALSE	TRUE	FALSE	FALSE
pcodonTACTAA	3682	0.0772216	0.00454583	0.294	0.832	0.290402	0.833625	107	0.307696	0.0870369	0.068	0.746	0.0613205	0.762227	0.00203665	MIC not significant	FALSE	FALSE	FALSE	FALSE	FALSE	FALSE	FALSE	FALSE
pcodonTACTAG	3682	0.0841228	0.00913798	0.026	0.698	0.0224737	0.719979	229	0.249437	0.0588859	0.038	0.731	0.0254665	0.74052	0.000209191	non-significant monotone/non-monotone	FALSE	FALSE	FALSE	FALSE	FALSE	FALSE	FALSE	FALSE
pcodonTACTGT	3682	0.0930627	0.0156117	1.9802e-05	0.397743	1.09971e-06	0.40964	211	0.221962	0.0233146	0.246	0.56	0.263292	0.590045	0.0265675	MIC not significant	TRUE	FALSE	FALSE	FALSE	TRUE	FALSE	FALSE	FALSE
pcodonTACTGC	3682	0.0783479	0.00416664	0.234	0.692	0.234699	0.69639	156	0.272383	0.0767926	0.066	0.823	0.0513426	0.82342	0.000461485	MIC not significant	FALSE	FALSE	FALSE	FALSE	FALSE	FALSE	FALSE	FALSE
pcodonTACTGA	3682	0.0779165	0.00421973	0.249	0.703	0.252429	0.716807	162	0.302233	0.0138247	0.004	0.006	0.000793995	0.00207342	0.136195	MIC not significant	FALSE	TRUE	FALSE	FALSE	FALSE	TRUE	FALSE	FALSE
pcodonTACTGG	3682	0.0902149	0.0118741	0.001	0.459	0.000397161	0.464598	281	0.226922	0.0209882	0.025	0.129	0.017643	0.12762	0.015077	non-significant monotone/non-monotone	TRUE	FALSE	FALSE	FALSE	TRUE	TRUE	FALSE	FALSE
pcodonTACCTT	3682	0.0805136	0.00300759	0.181	0.436	0.177184	0.448348	232	0.237715	0.0671755	0.079	0.957	0.0680306	0.941337	6.47207e-05	MIC not significant	FALSE	FALSE	FALSE	FALSE	FALSE	FALSE	FALSE	FALSE
pcodonTACCTC	3682	0.0775093	0.00224464	0.273	0.57	0.280894	0.604143	68	0.268783	0.0359661	0.55	0.729	0.57143	0.747317	0.121389	MIC not significant	FALSE	FALSE	FALSE	FALSE	FALSE	FALSE	FALSE	FALSE
pcodonTACCTA	3682	0.07727	0.00323051	0.269	0.679	0.283061	0.69124	95	0.256124	0.0370454	0.339	0.629	0.373799	0.662328	0.0616699	MIC not significant	FALSE	FALSE	FALSE	FALSE	FALSE	FALSE	FALSE	FALSE
pcodonTACCTG	3682	0.0819703	0.00369671	0.012	0.156	0.0125769	0.146742	101	0.237625	0.0342036	0.397	0.696	0.427583	0.713486	0.0640953	MIC not significant	TRUE	FALSE	FALSE	FALSE	TRUE	FALSE	FALSE	FALSE
pcodonTACCCT	3682	0.0758711	0.00210964	0.472	0.717	0.485878	0.737432	101	0.307593	0.0672318	0.027	0.296	0.0145872	0.319944	0.00883565	MIC not significant	FALSE	FALSE	FALSE	FALSE	FALSE	TRUE	FALSE	FALSE
pcodonTACCCC	3682	0.0797425	0.00127485	0.062	0.153	0.0573634	0.138197	50	0.263648	0.00215617	0.697	0.577	0.715712	0.60174	0.748173	MIC not significant	FALSE	FALSE	FALSE	FALSE	FALSE	FALSE	FALSE	FALSE
pcodonTACCCG	3682	0.0798789	0.001849	0.074	0.17	0.0655763	0.170533	102	0.272949	0.0160832	0.345	0.427	0.376359	0.454462	0.204025	MIC not significant	FALSE	FALSE	FALSE	FALSE	FALSE	FALSE	FALSE	FALSE
pcodonTACCGT	3682	0.0814074	0.00500556	0.028	0.374	0.0165325	0.399175	72	0.348352	0.0392065	0.049	0.1	0.0324359	0.0920386	0.0954575	non-significant monotone/non-monotone	FALSE	FALSE	FALSE	FALSE	FALSE	FALSE	FALSE	FALSE
pcodonTACCGA	3682	0.0791416	0.00381687	0.09	0.676	0.0904931	0.692812	51	0.290012	0.0241899	0.458	0.503	0.515766	0.558125	0.27579	MIC not significant	FALSE	FALSE	FALSE	FALSE	FALSE	FALSE	FALSE	FALSE
pcodonTACCGG	3682	0.0863954	0.00810395	0.00032	0.15095	4.54426e-05	0.150206	90	0.292611	0.00578869	0.144	0.118	0.147902	0.11718	0.475308	MIC not significant	TRUE	FALSE	FALSE	FALSE	TRUE	FALSE	FALSE	FALSE
pcodonTACATT	3682	0.0924659	0.0113308	0.000316832	0.249475	6.55321e-05	0.254921	338	0.209426	0.0305858	0.056	0.501	0.0502021	0.517079	0.00124537	MIC not significant	TRUE	FALSE	FALSE	FALSE	TRUE	FALSE	FALSE	FALSE
pcodonTACATC	3682	0.0839836	0.0034069	0.016	0.094	0.0109095	0.0862661	174	0.23834	0.0514243	0.274	0.914	0.302756	0.908381	0.00262081	MIC not significant	FALSE	FALSE	FALSE	FALSE	TRUE	FALSE	FALSE	FALSE
pcodonTACATA	3682	0.0767526	0.00391468	0.442	0.846	0.450952	0.842266	168	0.295864	0.109279	0.004	0.783	0.000716328	0.796929	1.20652e-05	MIC not significant	FALSE	TRUE	FALSE	FALSE	FALSE	TRUE	FALSE	FALSE
pcodonTACATG	3682	0.0867213	0.00683615	0.017	0.365	0.0132208	0.37431	350	0.231642	0.0351631	0.004	0.098	0.000466806	0.0963543	0.000420403	non-significant monotone/non-monotone	FALSE	TRUE	FALSE	FALSE	TRUE	TRUE	FALSE	FALSE
pcodonTACACT	3682	0.0797967	0.00471741	0.09	0.544	0.0860572	0.548615	134	0.222076	0.00690634	0.632	0.621	0.658597	0.649983	0.339758	MIC not significant	FALSE	FALSE	FALSE	FALSE	FALSE	FALSE	FALSE	FALSE
pcodonTACACC	3682	0.0810444	0.000352961	0.042	0.044	0.0393013	0.0408395	125	0.269169	0.0218088	0.209	0.346	0.230877	0.38749	0.100274	MIC not significant	FALSE	FALSE	FALSE	FALSE	FALSE	FALSE	FALSE	FALSE
pcodonTACACG	3682	0.0747523	0.000711943	0.646	0.694	0.634498	0.688304	153	0.231796	0.0359523	0.46	0.881	0.485895	0.870462	0.0189019	MIC not significant	FALSE	FALSE	FALSE	FALSE	FALSE	FALSE	FALSE	FALSE
pcodonTACAAT	3682	0.0809261	0.00242671	0.059	0.165	0.0465877	0.161931	129	0.288013	0.00721433	0.059	0.049	0.0512594	0.0466551	0.338546	MIC not significant	FALSE	FALSE	FALSE	FALSE	FALSE	FALSE	FALSE	FALSE
pcodonTACAAC	3682	0.0758565	0.00110133	0.417	0.555	0.443476	0.567076	101	0.386975	0.195505	0.001	0.827	3.15169e-06	0.823259	3.66988e-06	MIC not significant	FALSE	TRUE	FALSE	FALSE	FALSE	TRUE	FALSE	FALSE
pcodonTACAAA	3682	0.0824144	0.00159395	0.008	0.037	0.00706454	0.025523	76	0.305774	0.032598	0.12	0.221	0.123321	0.23773	0.11858	MIC not significant	TRUE	FALSE	FALSE	FALSE	TRUE	FALSE	FALSE	FALSE
pcodonTACAAG	3682	0.0818522	0.000983737	0.093	0.121	0.0842078	0.119624	213	0.257428	0.0458903	0.024	0.342	0.0120693	0.371162	0.00166298	MIC not significant	FALSE	FALSE	FALSE	FALSE	FALSE	TRUE	FALSE	FALSE
pcodonTACAGT	3682	0.0761004	0.00163338	0.425	0.611	0.438954	0.63208	103	0.297041	0.0110563	0.169	0.177	0.168473	0.173975	0.28998	MIC not significant	FALSE	FALSE	FALSE	FALSE	FALSE	FALSE	FALSE	FALSE
pcodonTACAGC	3682	0.0754262	0.00084681	0.585	0.678	0.608391	0.700344	70	0.386501	0.0858683	0.027	0.176	0.0103096	0.195071	0.0138224	MIC not significant	FALSE	FALSE	FALSE	FALSE	FALSE	TRUE	FALSE	FALSE
pcodonTACAGA	3682	0.0821581	0.00390474	0.013	0.163	0.00803709	0.160839	78	0.210998	0.00189897	0.83	0.737	0.826045	0.752733	0.704814	MIC not significant	TRUE	FALSE	FALSE	FALSE	TRUE	FALSE	FALSE	FALSE
pcodonTACAGG	3682	0.0767428	0.00784279	0.461	0.99	0.482623	0.984333	195	0.25473	0.02297	0.036	0.135	0.0277659	0.119253	0.0344278	MIC not significant	FALSE	FALSE	FALSE	FALSE	FALSE	FALSE	FALSE	FALSE
pcodonTACGTC	3682	0.0725628	4.53173e-05	0.868	0.854	0.852636	0.837158	110	0.228171	0.0124825	0.675	0.727	0.702608	0.733589	0.245219	MIC not significant	FALSE	FALSE	FALSE	FALSE	FALSE	FALSE	FALSE	FALSE
pcodonTACGTG	3682	0.0844105	0.00689097	0.005	0.23	0.00158911	0.245722	132	0.305521	0.0315851	0.026	0.088	0.0131129	0.0669539	0.0414791	non-significant monotone/non-monotone	TRUE	FALSE	FALSE	FALSE	TRUE	TRUE	FALSE	FALSE
pcodonTACGCT	3682	0.0753866	0.00805808	0.619	0.999	0.639078	0.996229	196	0.210921	0.047551	0.376	0.959	0.405268	0.945522	0.00213789	MIC not significant	FALSE	FALSE	FALSE	FALSE	FALSE	FALSE	FALSE	FALSE
pcodonTACGCC	3682	0.0852218	4.50882e-05	0.004	0.002	0.00185981	0.00132943	154	0.228905	0.0264056	0.468	0.751	0.500565	0.761248	0.0440598	MIC not significant	TRUE	FALSE	FALSE	FALSE	TRUE	FALSE	FALSE	FALSE
pcodonTACGCA	3682	0.0796991	0.00365537	0.067	0.427	0.0613898	0.448034	72	0.393747	0.113096	0.01	0.235	0.00171085	0.237824	0.00387371	MIC not significant	FALSE	TRUE	FALSE	FALSE	FALSE	TRUE	FALSE	FALSE
pcodonTACGCG	3682	0.0824882	0.00358293	0.068	0.277	0.0617013	0.285038	234	0.213331	0.0344929	0.333	0.868	0.373711	0.863222	0.00436313	MIC not significant	FALSE	FALSE	FALSE	FALSE	FALSE	FALSE	FALSE	FALSE
pcodonTACGAA	3682	0.0790219	0.0034605	0.118	0.544	0.120714	0.561212	70	0.253411	0.000374463	0.599	0.474	0.64175	0.519679	0.873667	MIC not significant	FALSE	FALSE	FALSE	FALSE	FALSE	FALSE	FALSE	FALSE
pcodonTACGAG	3682	0.0747718	0.00211294	0.762	0.954	0.768561	0.93903	59	0.30204	0.0542174	0.194	0.438	0.213502	0.474731	0.0760642	MIC not significant	FALSE	FALSE	FALSE	FALSE	FALSE	FALSE	FALSE	FALSE
pcodonTACGGT	3682	0.0782776	0.00253465	0.246	0.511	0.270627	0.52702	170	0.225812	0.0253174	0.276	0.577	0.306115	0.609221	0.0382173	MIC not significant	FALSE	FALSE	FALSE	FALSE	FALSE	FALSE	FALSE	FALSE
pcodonTACGGC	3682	0.0753895	0.00253808	0.508	0.795	0.536997	0.797265	119	0.252931	0.0352673	0.255	0.562	0.279318	0.595853	0.0408331	MIC not significant	FALSE	FALSE	FALSE	FALSE	FALSE	FALSE	FALSE	FALSE
pcodonTACGGA	3682	0.0781177	0.00656206	0.239	0.907	0.245188	0.895843	153	0.210394	0.0247394	0.791	0.959	0.786586	0.930466	0.0521747	MIC not significant	FALSE	FALSE	FALSE	FALSE	FALSE	FALSE	FALSE	FALSE
pcodonTACGGG	3682	0.0795631	0.00748487	0.188	0.905	0.176037	0.8956	178	0.307114	0.0744797	0.003	0.258	0.000430599	0.285058	0.000228137	MIC not significant	FALSE	TRUE	FALSE	FALSE	FALSE	TRUE	FALSE	FALSE
pcodonTAATTT	3682	0.101648	0.0216787	0	0.550406	3.94327e-09	0.562316	486	0.184308	0.0290155	0.058	0.682	0.0532487	0.704632	0.000161207	MIC not significant	TRUE	FALSE	FALSE	FALSE	TRUE	FALSE	FALSE	FALSE
pcodonTAATTC	3682	0.0811173	0.00198889	0.124	0.252	0.128605	0.261641	217	0.255727	0.0324158	0.021	0.127	0.0079039	0.126492	0.00784533	MIC not significant	FALSE	FALSE	FALSE	FALSE	FALSE	TRUE	FALSE	FALSE
pcodonTAATTA	3682	0.0869319	0.00810952	0.012	0.501	0.0132092	0.520234	330	0.231243	0.0541712	0.008	0.608	0.0027878	0.625892	1.94762e-05	non-significant monotone/non-monotone	TRUE	TRUE	FALSE	FALSE	TRUE	TRUE	FALSE	FALSE
pcodonTAATTG	3682	0.0936588	0.0203472	6.12245e-05	0.915449	4.58003e-06	0.911306	281	0.182064	0.0183375	0.62	0.899	0.648082	0.883803	0.0231872	MIC not significant	TRUE	FALSE	FALSE	FALSE	TRUE	FALSE	FALSE	FALSE
pcodonTAATCT	3682	0.0805882	0.00527589	0.087	0.527	0.0880474	0.548772	160	0.279697	0.0932289	0.036	0.916	0.0193247	0.892247	8.6335e-05	MIC not significant	FALSE	FALSE	FALSE	FALSE	FALSE	FALSE	FALSE	FALSE
pcodonTAATCC	3682	0.0818107	0.00298663	0.019	0.113	0.0137887	0.108912	97	0.194075	0.00485074	0.936	0.913	0.906559	0.883494	0.497849	MIC not significant	FALSE	FALSE	FALSE	FALSE	TRUE	FALSE	FALSE	FALSE
pcodonTAATCA	3682	0.081731	0.00670171	0.011	0.631	0.010277	0.660476	64	0.372912	0.169666	0.063	0.951	0.0496499	0.928013	0.00079583	MIC not significant	TRUE	FALSE	FALSE	FALSE	TRUE	FALSE	FALSE	FALSE
pcodonTAATCG	3682	0.0774462	0.00603806	0.259	0.926	0.268999	0.910913	119	0.338259	0.0222692	0.002	0.007	0.000308337	0.00146309	0.105277	MIC not significant	FALSE	TRUE	FALSE	FALSE	FALSE	TRUE	FALSE	FALSE
pcodonTAATAT	3682	0.0750891	0.00519938	0.682	0.981	0.699207	0.978022	199	0.234712	0.0136052	0.091	0.146	0.0819653	0.157078	0.100867	MIC not significant	FALSE	FALSE	FALSE	FALSE	FALSE	FALSE	FALSE	FALSE
pcodonTAATAC	3682	0.0811163	0.00451938	0.029	0.338	0.0195573	0.348862	78	0.315847	0.0438392	0.07	0.171	0.0545338	0.184523	0.0658016	MIC not significant	FALSE	FALSE	FALSE	FALSE	FALSE	FALSE	FALSE	FALSE
pcodonTAATAA	3682	0.0808232	0.00499491	0.04	0.409	0.0305102	0.413482	103	0.243505	0.00654572	0.674	0.645	0.691401	0.657822	0.416554	MIC not significant	FALSE	FALSE	FALSE	FALSE	FALSE	FALSE	FALSE	FALSE
pcodonTAATAG	3682	0.0753331	0.00257066	0.521	0.83	0.548004	0.826488	106	0.257034	0.00744418	0.433	0.405	0.474838	0.453561	0.379178	MIC not significant	FALSE	FALSE	FALSE	FALSE	FALSE	FALSE	FALSE	FALSE
pcodonTAATGT	3682	0.0904398	0.0155552	0.000163265	0.650327	1.64541e-05	0.660743	189	0.257216	0.0433859	0.031	0.328	0.0253803	0.371396	0.00402533	non-significant monotone/non-monotone	TRUE	FALSE	FALSE	FALSE	TRUE	FALSE	FALSE	FALSE
pcodonTAATGC	3682	0.0828386	0.00310866	0.014	0.063	0.00561277	0.0594492	114	0.221057	0.0403564	0.7	0.964	0.710932	0.934909	0.0320996	MIC not significant	TRUE	FALSE	FALSE	FALSE	TRUE	FALSE	FALSE	FALSE
pcodonTAATGA	3682	0.0732548	0.00287722	0.789	0.966	0.796467	0.954561	131	0.259127	0.00307389	0.211	0.186	0.229853	0.192193	0.529367	MIC not significant	FALSE	FALSE	FALSE	FALSE	FALSE	FALSE	FALSE	FALSE
pcodonTAATGG	3682	0.0800194	0.00714768	0.193	0.861	0.198919	0.871463	223	0.254714	0.0729327	0.014	0.759	0.00543713	0.765741	4.38143e-05	MIC not significant	FALSE	TRUE	FALSE	FALSE	FALSE	TRUE	FALSE	FALSE
pcodonTAACTT	3682	0.0855547	0.00578335	0.017	0.287	0.0177254	0.291109	274	0.227258	0.0248089	0.04	0.206	0.028167	0.222974	0.00901112	non-significant monotone/non-monotone	FALSE	FALSE	FALSE	FALSE	FALSE	FALSE	FALSE	FALSE
pcodonTAACTC	3682	0.0771006	0.00129892	0.325	0.48	0.3408	0.51232	66	0.337353	0.0670175	0.12	0.422	0.112259	0.46426	0.0358284	MIC not significant	FALSE	FALSE	FALSE	FALSE	FALSE	FALSE	FALSE	FALSE
pcodonTAACTA	3682	0.0808865	0.011323	0.048	0.987	0.0434555	0.977519	126	0.283615	0.0695168	0.112	0.782	0.107313	0.778627	0.00285386	MIC not significant	FALSE	FALSE	FALSE	FALSE	FALSE	FALSE	FALSE	FALSE
pcodonTAACTG	3682	0.0869698	0.0115625	0.000834951	0.503049	0.000189416	0.518698	140	0.254933	0.0658782	0.172	0.883	0.179817	0.870463	0.00220485	MIC not significant	TRUE	FALSE	FALSE	FALSE	TRUE	FALSE	FALSE	FALSE
pcodonTAACCT	3682	0.0812119	0.00329819	0.061	0.257	0.0517069	0.257008	163	0.257874	0.0358645	0.075	0.343	0.068397	0.374101	0.0154704	MIC not significant	FALSE	FALSE	FALSE	FALSE	FALSE	FALSE	FALSE	FALSE
pcodonTAACCC	3682	0.0762803	0.0015082	0.449	0.651	0.46817	0.665481	68	0.264468	0.0159747	0.577	0.57	0.606082	0.61296	0.304397	MIC not significant	FALSE	FALSE	FALSE	FALSE	FALSE	FALSE	FALSE	FALSE
pcodonTAACCA	3682	0.0757908	0.00107539	0.668	0.803	0.684762	0.813862	47	0.422887	0.0211295	0.031	0.035	0.0261593	0.025255	0.329613	MIC not significant	FALSE	FALSE	FALSE	FALSE	FALSE	FALSE	FALSE	FALSE
pcodonTAACCG	3682	0.0829799	0.00854985	0.01	0.632	0.00979042	0.634307	132	0.238475	0.00873079	0.401	0.426	0.446282	0.4599	0.286581	MIC not significant	TRUE	FALSE	FALSE	FALSE	TRUE	FALSE	FALSE	FALSE
pcodonTAACAT	3682	0.0794025	0.00395866	0.09	0.64	0.0788658	0.666477	49	0.318955	0.0442546	0.333	0.499	0.370804	0.526689	0.146821	MIC not significant	FALSE	FALSE	FALSE	FALSE	FALSE	FALSE	FALSE	FALSE
pcodonTAACAG	3682	0.0774097	0.000354206	0.264	0.267	0.26512	0.275654	71	0.251379	0.0125527	0.601	0.606	0.646813	0.64263	0.351438	MIC not significant	FALSE	FALSE	FALSE	FALSE	FALSE	FALSE	FALSE	FALSE
pcodonTAACGT	3682	0.082392	0.0113487	0.036	0.939	0.0291004	0.936158	170	0.247096	0.0182206	0.09	0.159	0.0779418	0.168053	0.0792542	MIC not significant	FALSE	FALSE	FALSE	FALSE	FALSE	FALSE	FALSE	FALSE
pcodonTAACGC	3682	0.0784354	0.00438937	0.17	0.817	0.159204	0.825169	62	0.286631	0.0342853	0.185	0.299	0.20764	0.340107	0.149357	MIC not significant	FALSE	FALSE	FALSE	FALSE	FALSE	FALSE	FALSE	FALSE
pcodonTAACGA	3682	0.0782407	0.00481652	0.191	0.748	0.188278	0.744767	124	0.326724	0.0692806	0.024	0.291	0.00942002	0.312255	0.00314103	MIC not significant	FALSE	FALSE	FALSE	FALSE	FALSE	TRUE	FALSE	FALSE
pcodonTAACGG	3682	0.0802189	0.0128303	0.075	0.999	0.0687703	0.996487	134	0.242262	0.0143604	0.374	0.465	0.418134	0.503976	0.167843	MIC not significant	FALSE	FALSE	FALSE	FALSE	FALSE	FALSE	FALSE	FALSE
pcodonTAAATT	3682	0.0764883	0.00390586	0.77	0.97	0.786061	0.964046	352	0.207552	0.0574975	0.036	0.947	0.0220316	0.937295	5.38166e-06	MIC not significant	FALSE	FALSE	FALSE	FALSE	FALSE	FALSE	FALSE	FALSE
pcodonTAAATC	3682	0.0717378	0.000736288	0.916	0.94	0.920788	0.940213	168	0.203287	0.0147711	0.668	0.791	0.68083	0.79421	0.116566	MIC not significant	FALSE	FALSE	FALSE	FALSE	FALSE	FALSE	FALSE	FALSE
pcodonTAAATA	3682	0.0765732	0.00193928	0.431	0.632	0.440238	0.645365	162	0.324505	0.0807441	0.00090099	0.130178	3.15026e-05	0.130284	0.000247794	MIC not significant	FALSE	TRUE	FALSE	FALSE	FALSE	TRUE	FALSE	FALSE
pcodonTAAATG	3682	0.0821662	0.00754594	0.145	0.826	0.136999	0.832504	281	0.207705	0.0502309	0.174	0.961	0.172546	0.941119	0.000151537	MIC not significant	FALSE	FALSE	FALSE	FALSE	FALSE	FALSE	FALSE	FALSE
pcodonTAAACT	3682	0.0783753	0.00146021	0.222	0.338	0.225631	0.35357	163	0.217931	0.0082704	0.5	0.53	0.529901	0.559822	0.248285	MIC not significant	FALSE	FALSE	FALSE	FALSE	FALSE	FALSE	FALSE	FALSE
pcodonTAAACC	3682	0.0789657	0.00027052	0.139	0.138	0.131797	0.128278	114	0.25906	0.00664785	0.243	0.23	0.268845	0.249448	0.388472	MIC not significant	FALSE	FALSE	FALSE	FALSE	FALSE	FALSE	FALSE	FALSE
pcodonTAAACA	3682	0.0787647	0.00132394	0.144	0.26	0.131862	0.259722	63	0.220028	0.0347809	0.962	0.989	0.931173	0.973071	0.14333	MIC not significant	FALSE	FALSE	FALSE	FALSE	FALSE	FALSE	FALSE	FALSE
pcodonTAAACG	3682	0.082283	0.00221477	0.061	0.143	0.0543276	0.146956	190	0.265948	0.0404415	0.02	0.188	0.00748942	0.192321	0.00539964	MIC not significant	FALSE	FALSE	FALSE	FALSE	FALSE	TRUE	FALSE	FALSE
pcodonTAAAAT	3682	0.0769548	0.00354026	0.327	0.843	0.359329	0.839667	69	0.298888	0.0748638	0.245	0.805	0.283972	0.778013	0.0229135	MIC not significant	FALSE	FALSE	FALSE	FALSE	FALSE	FALSE	FALSE	FALSE
pcodonTAAAAC	3682	0.0736128	0.00122625	0.796	0.902	0.805966	0.893272	81	0.293007	0.0547517	0.105	0.367	0.0942959	0.405924	0.0355122	MIC not significant	FALSE	FALSE	FALSE	FALSE	FALSE	FALSE	FALSE	FALSE
pcodonTAAAAG	3682	0.0730713	0.000577674	0.805	0.83	0.804632	0.83291	133	0.226127	0.0315222	0.619	0.872	0.638985	0.872673	0.0409048	MIC not significant	FALSE	FALSE	FALSE	FALSE	FALSE	FALSE	FALSE	FALSE
pcodonTAAAGT	3682	0.0789747	0.00711691	0.147	0.885	0.143579	0.877557	115	0.34462	0.0974886	0.004	0.258	0.000481847	0.275805	0.0006811	MIC not significant	FALSE	TRUE	FALSE	FALSE	FALSE	TRUE	FALSE	FALSE
pcodonTAAAGC	3682	0.0724024	9.08973e-05	0.924	0.915	0.913943	0.90388	81	0.375044	0.0457688	0.001	0.016	0.000319908	0.00600099	0.0551404	MIC not significant	FALSE	TRUE	FALSE	FALSE	FALSE	TRUE	FALSE	FALSE
pcodonTAAAGA	3682	0.0766581	0.00289884	0.358	0.74	0.384503	0.7528	91	0.301272	0.0339982	0.124	0.241	0.11574	0.266586	0.0801788	MIC not significant	FALSE	FALSE	FALSE	FALSE	FALSE	FALSE	FALSE	FALSE
pcodonTAAAGG	3682	0.0804113	0.00201131	0.068	0.161	0.0674056	0.17306	140	0.242608	0.04549	0.26	0.762	0.287164	0.770199	0.0114008	MIC not significant	FALSE	FALSE	FALSE	FALSE	FALSE	FALSE	FALSE	FALSE
pcodonTAAGTC	3682	0.0826144	0.00234437	0.023	0.067	0.0130818	0.0600317	124	0.338795	0.0777457	0.007	0.239	0.00215629	0.25894	0.00171327	non-significant monotone/non-monotone	FALSE	TRUE	FALSE	FALSE	TRUE	TRUE	FALSE	FALSE
pcodonTAAGTG	3682	0.088031	0.0164433	0.000510204	0.914847	0.000150436	0.909409	170	0.219974	0.055349	0.352	0.975	0.391889	0.958907	0.00201307	MIC not significant	TRUE	FALSE	FALSE	FALSE	TRUE	FALSE	FALSE	FALSE
pcodonTAAGCT	3682	0.0813448	0.00653134	0.059	0.621	0.0584295	0.634248	165	0.193915	0.00850611	0.813	0.834	0.813493	0.835958	0.238715	MIC not significant	FALSE	FALSE	FALSE	FALSE	FALSE	FALSE	FALSE	FALSE
pcodonTAAGCC	3682	0.0769322	0.000879985	0.298	0.385	0.325249	0.411866	84	0.308013	0.000214929	0.174	0.126	0.177119	0.120301	0.8947	MIC not significant	FALSE	FALSE	FALSE	FALSE	FALSE	FALSE	FALSE	FALSE
pcodonTAAGCA	3682	0.0830687	0.00560011	0.004	0.209	0.00272646	0.219262	86	0.342074	0.076236	0.035	0.343	0.0216624	0.366589	0.0100737	non-significant monotone/non-monotone	TRUE	FALSE	FALSE	FALSE	TRUE	FALSE	FALSE	FALSE
pcodonTAAGCG	3682	0.0797109	0.00460617	0.135	0.566	0.135451	0.583346	168	0.287264	0.101153	0.009	0.804	0.00120703	0.803915	2.6554e-05	MIC not significant	FALSE	TRUE	FALSE	FALSE	FALSE	TRUE	FALSE	FALSE
pcodonTAAGAA	3682	0.0778814	0.00386994	0.223	0.707	0.22601	0.712001	89	0.240064	0.0202051	0.646	0.757	0.679067	0.760378	0.183917	MIC not significant	FALSE	FALSE	FALSE	FALSE	FALSE	FALSE	FALSE	FALSE
pcodonTAAGAG	3682	0.077705	0.00207789	0.274	0.549	0.285489	0.58366	60	0.297399	0.0350225	0.201	0.284	0.205027	0.322971	0.152203	MIC not significant	FALSE	FALSE	FALSE	FALSE	FALSE	FALSE	FALSE	FALSE
pcodonTAAGGT	3682	0.0880709	0.0103373	0.005	0.46	0.00155956	0.468066	245	0.224586	1.38274e-05	0.095	0.068	0.0933878	0.063171	0.953823	MIC not significant	TRUE	FALSE	FALSE	FALSE	TRUE	FALSE	FALSE	FALSE
pcodonTAAGGC	3682	0.0844489	0.00430213	0.009	0.107	0.00597134	0.0974342	176	0.277683	0.0426258	0.022	0.221	0.0146578	0.240013	0.00597466	non-significant monotone/non-monotone	TRUE	FALSE	FALSE	FALSE	TRUE	TRUE	FALSE	FALSE
pcodonTAAGGA	3682	0.0780848	0.0048398	0.364	0.842	0.364711	0.842534	198	0.212759	0.0264375	0.312	0.687	0.350573	0.711094	0.0220971	MIC not significant	FALSE	FALSE	FALSE	FALSE	FALSE	FALSE	FALSE	FALSE
pcodonTAAGGG	3682	0.088085	0.00906339	0.001	0.301	0.000954531	0.293731	249	0.169845	0.0417874	0.922911	0.99998	0.907094	0.999476	0.00117956	MIC not significant	TRUE	FALSE	FALSE	FALSE	TRUE	FALSE	FALSE	FALSE
pcodonTAGTTT	3682	0.0924666	0.0101152	0.003	0.307	0.000883312	0.324412	505	0.175619	0.0386379	0.097	0.967	0.0807316	0.946815	8.59528e-06	MIC not significant	TRUE	FALSE	FALSE	FALSE	TRUE	FALSE	FALSE	FALSE
pcodonTAGTTC	3682	0.0850427	0.00722648	0.032	0.506	0.0293933	0.530466	302	0.194919	0.0308685	0.332	0.905	0.359657	0.895571	0.0021807	MIC not significant	FALSE	FALSE	FALSE	FALSE	FALSE	FALSE	FALSE	FALSE
pcodonTAGTTA	3682	0.0825812	0.00280194	0.116	0.298	0.106795	0.308374	286	0.231678	0.0374442	0.006	0.264	0.00486397	0.264173	0.00100444	MIC not significant	FALSE	TRUE	FALSE	FALSE	FALSE	TRUE	FALSE	FALSE
pcodonTAGTTG	3682	0.103266	0.0291345	0	0.961272	1.1812e-10	0.955907	459	0.189404	0.0222397	0.034	0.338	0.0243494	0.347331	0.00135426	non-significant monotone/non-monotone	TRUE	FALSE	FALSE	FALSE	TRUE	FALSE	FALSE	FALSE
pcodonTAGTCT	3682	0.0877475	0.01112	0.002	0.515	0.00112878	0.540491	227	0.242126	0.0883577	0.023	0.985	0.0109627	0.973986	5.18324e-06	Monotone	TRUE	FALSE	FALSE	FALSE	TRUE	TRUE	FALSE	FALSE
pcodonTAGTCC	3682	0.0825607	0.00363132	0.014	0.118	0.0109962	0.120822	146	0.308915	0.058356	0.00332292	0.0865208	0.000485904	0.078115	0.00330931	non-significant monotone/non-monotone	TRUE	TRUE	FALSE	FALSE	TRUE	TRUE	FALSE	FALSE
pcodonTAGTCA	3682	0.0788515	0.00384236	0.137	0.531	0.133524	0.565575	99	0.271764	0.0517582	0.155	0.566	0.172158	0.592204	0.0235326	MIC not significant	FALSE	FALSE	FALSE	FALSE	FALSE	FALSE	FALSE	FALSE
pcodonTAGTCG	3682	0.0772412	0.00354586	0.472	0.819	0.479321	0.820208	217	0.264047	0.059204	0.008	0.379	0.00243343	0.410604	0.000296732	MIC not significant	FALSE	TRUE	FALSE	FALSE	FALSE	TRUE	FALSE	FALSE
pcodonTAGTAT	3682	0.0851542	0.0069687	0.013	0.336	0.00875789	0.334638	207	0.218793	0.0189955	0.344	0.572	0.35708	0.598575	0.0476589	MIC not significant	TRUE	FALSE	FALSE	FALSE	TRUE	FALSE	FALSE	FALSE
pcodonTAGTAC	3682	0.081304	0.00648344	0.071	0.624	0.0608311	0.64841	173	0.261241	0.0236792	0.096	0.229	0.0817432	0.246614	0.0432419	MIC not significant	FALSE	FALSE	FALSE	FALSE	FALSE	FALSE	FALSE	FALSE
pcodonTAGTAA	3682	0.0741441	0.00620134	0.701	0.999	0.71083	0.995007	113	0.32156	0.0126218	0.014	0.015	0.00603937	0.007117	0.236121	MIC not significant	FALSE	TRUE	FALSE	FALSE	FALSE	TRUE	FALSE	FALSE
pcodonTAGTAG	3682	0.0788239	0.0100302	0.407	0.999	0.432977	0.995431	271	0.181672	0.0157335	0.745	0.921	0.754762	0.906835	0.0390646	MIC not significant	FALSE	FALSE	FALSE	FALSE	FALSE	FALSE	FALSE	FALSE
pcodonTAGTGT	3682	0.089741	0.0129838	0.001	0.608	0.000627713	0.606738	269	0.227748	0.0207589	0.052	0.197	0.0405913	0.207855	0.018058	MIC not significant	TRUE	FALSE	FALSE	FALSE	TRUE	FALSE	FALSE	FALSE
pcodonTAGTGC	3682	0.0834921	0.00242111	0.022	0.079	0.018569	0.0719196	180	0.269774	0.044478	0.035	0.31	0.0252267	0.349119	0.00448573	non-significant monotone/non-monotone	FALSE	FALSE	FALSE	FALSE	FALSE	FALSE	FALSE	FALSE
pcodonTAGTGA	3682	0.0831157	0.00531716	0.029	0.31	0.0240287	0.313055	187	0.270535	0.0243277	0.015	0.056	0.00663389	0.0445578	0.0330345	non-significant monotone/non-monotone	FALSE	FALSE	FALSE	FALSE	FALSE	TRUE	FALSE	FALSE
pcodonTAGTGG	3682	0.0772915	0.00727373	0.684	0.998	0.694862	0.993917	329	0.174669	0.0243446	0.749	0.985	0.758946	0.979361	0.00455813	MIC not significant	FALSE	FALSE	FALSE	FALSE	FALSE	FALSE	FALSE	FALSE
pcodonTAGCTT	3682	0.0746506	0.00333155	0.802	0.964	0.798444	0.958105	245	0.218043	0.0227188	0.151	0.426	0.148256	0.459315	0.0182405	MIC not significant	FALSE	FALSE	FALSE	FALSE	FALSE	FALSE	FALSE	FALSE
pcodonTAGCTC	3682	0.0848546	0.00743128	0.001	0.238	0.000313307	0.24174	83	0.315665	0.0677286	0.143	0.606	0.157478	0.633305	0.0174964	MIC not significant	TRUE	FALSE	FALSE	FALSE	TRUE	FALSE	FALSE	FALSE
pcodonTAGCTA	3682	0.0784647	0.00229385	0.156	0.411	0.15894	0.415408	80	0.195348	0.00702878	0.914	0.896	0.891631	0.865161	0.459683	MIC not significant	FALSE	FALSE	FALSE	FALSE	FALSE	FALSE	FALSE	FALSE
pcodonTAGCTG	3682	0.0784999	0.00571616	0.229	0.814	0.229432	0.819816	155	0.312881	0.158423	0.003	0.999	0.00119111	0.992632	2.91661e-07	MIC not significant	FALSE	TRUE	FALSE	FALSE	FALSE	TRUE	FALSE	FALSE
pcodonTAGCCT	3682	0.0767737	0.00304695	0.344	0.713	0.361174	0.715748	136	0.237819	0.00270292	0.414	0.352	0.455402	0.39318	0.547768	MIC not significant	FALSE	FALSE	FALSE	FALSE	FALSE	FALSE	FALSE	FALSE
pcodonTAGCCC	3682	0.0779751	0.00254609	0.207	0.493	0.210995	0.526855	79	0.29313	0.0610615	0.142	0.487	0.140231	0.546069	0.0281285	MIC not significant	FALSE	FALSE	FALSE	FALSE	FALSE	FALSE	FALSE	FALSE
pcodonTAGCCA	3682	0.0784108	0.00325581	0.188	0.702	0.18594	0.719611	51	0.238284	0.00048759	0.863	0.712	0.848069	0.737131	0.877568	MIC not significant	FALSE	FALSE	FALSE	FALSE	FALSE	FALSE	FALSE	FALSE
pcodonTAGCCG	3682	0.0802185	0.00329707	0.066	0.292	0.066983	0.304554	126	0.265063	0.00624762	0.272	0.242	0.27728	0.265281	0.378979	MIC not significant	FALSE	FALSE	FALSE	FALSE	FALSE	FALSE	FALSE	FALSE
pcodonTAGCAT	3682	0.0754599	0.00488088	0.73	1	0.750247	0.999675	42	0.374057	0.107814	0.061	0.323	0.044852	0.387117	0.033755	MIC not significant	FALSE	FALSE	FALSE	FALSE	FALSE	FALSE	FALSE	FALSE
pcodonTAGCAG	3682	0.0779491	0.00137591	0.24	0.415	0.24134	0.428362	55	0.310532	0.00962834	0.226	0.181	0.25916	0.199463	0.474942	MIC not significant	FALSE	FALSE	FALSE	FALSE	FALSE	FALSE	FALSE	FALSE
pcodonTAGCGT	3682	0.0792479	0.00293395	0.108	0.364	0.106898	0.389939	86	0.229361	0.0289354	0.842	0.94	0.836656	0.927905	0.117388	MIC not significant	FALSE	FALSE	FALSE	FALSE	FALSE	FALSE	FALSE	FALSE
pcodonTAGCGC	3682	0.0764761	0.00187542	0.449	0.749	0.476588	0.754927	57	0.421463	0.136249	0.007	0.206	0.00102215	0.230795	0.00471951	MIC not significant	FALSE	TRUE	FALSE	FALSE	FALSE	TRUE	FALSE	FALSE
pcodonTAGCGA	3682	0.0807925	0.00542946	0.041	0.503	0.0362283	0.521505	96	0.357139	0.0301719	0.011	0.018	0.000881857	0.00407833	0.0905487	Non-monotone	FALSE	TRUE	FALSE	FALSE	FALSE	TRUE	FALSE	FALSE
pcodonTAGCGG	3682	0.0823869	0.00805282	0.025	0.623	0.017681	0.639	126	0.327477	0.0954064	0.008	0.564	0.00413946	0.591917	0.000433075	non-significant monotone/non-monotone	FALSE	TRUE	FALSE	FALSE	FALSE	TRUE	FALSE	FALSE
pcodonTAGATT	3682	0.0870604	0.00847847	0.076	0.81	0.071016	0.810991	610	0.163684	0.0267665	0.122	0.904	0.13656	0.892991	4.91077e-05	MIC not significant	FALSE	FALSE	FALSE	FALSE	FALSE	FALSE	FALSE	FALSE
pcodonTAGATC	3682	0.0940706	0.00862823	0.001	0.035	1.05758e-05	0.0300489	327	0.25038	0.0794695	0.001	0.802	3.68415e-05	0.81057	2.17543e-07	non-significant monotone/non-monotone	TRUE	TRUE	FALSE	FALSE	TRUE	TRUE	FALSE	FALSE
pcodonTAGATA	3682	0.0790253	0.0020323	0.454	0.647	0.447352	0.638612	290	0.211264	0.0198061	0.174	0.47	0.183044	0.498529	0.0164752	MIC not significant	FALSE	FALSE	FALSE	FALSE	FALSE	FALSE	FALSE	FALSE
pcodonTAGATG	3682	0.097139	0.0167813	4.9505e-05	0.591535	7.59812e-06	0.601913	560	0.180127	0.0189582	0.038	0.3	0.0249104	0.317025	0.00108847	non-significant monotone/non-monotone	TRUE	FALSE	FALSE	FALSE	TRUE	FALSE	FALSE	FALSE
pcodonTAGACT	3682	0.085079	0.00848891	0.027	0.621	0.0229744	0.630421	262	0.247244	0.111787	0.0157426	0.999931	0.00747823	0.999308	2.91582e-08	Monotone	FALSE	FALSE	FALSE	FALSE	FALSE	TRUE	FALSE	FALSE
pcodonTAGACC	3682	0.0775038	0.000308615	0.436	0.442	0.443272	0.446943	205	0.256116	0.0710153	0.042	0.868	0.0350181	0.863297	0.000112344	MIC not significant	FALSE	FALSE	FALSE	FALSE	FALSE	FALSE	FALSE	FALSE
pcodonTAGACA	3682	0.083695	0.00214349	0.007	0.025	0.00206106	0.0136114	88	0.297906	0.035992	0.162	0.314	0.158387	0.355243	0.0766675	MIC not significant	TRUE	FALSE	FALSE	FALSE	TRUE	FALSE	FALSE	FALSE
pcodonTAGACG	3682	0.0876796	0.000513949	0.005	0.005	0.00236656	0.00285424	274	0.239571	0.0264422	0.015	0.099	0.00602705	0.0969727	0.00698926	non-significant monotone/non-monotone	TRUE	FALSE	FALSE	FALSE	TRUE	TRUE	FALSE	FALSE
pcodonTAGAAT	3682	0.0834196	0.0144259	0.019	0.998	0.0189405	0.990996	210	0.233109	0.0510396	0.166	0.871	0.165393	0.865917	0.000976979	MIC not significant	FALSE	FALSE	FALSE	FALSE	FALSE	FALSE	FALSE	FALSE
pcodonTAGAAC	3682	0.0743151	0.00212269	0.718	0.898	0.73555	0.883291	181	0.300318	0.0737281	0.005	0.308	0.000782699	0.33369	0.000217773	MIC not significant	FALSE	TRUE	FALSE	FALSE	FALSE	TRUE	FALSE	FALSE
pcodonTAGAAA	3682	0.0786801	0.00371703	0.168	0.547	0.158584	0.56728	114	0.30288	0.0241547	0.045	0.086	0.0298365	0.0751076	0.0987036	MIC not significant	FALSE	FALSE	FALSE	FALSE	FALSE	FALSE	FALSE	FALSE
pcodonTAGAAG	3682	0.0796327	0.00334898	0.481	0.803	0.491201	0.805165	376	0.217251	0.0511966	0.009	0.694	0.00283586	0.701853	9.40348e-06	MIC not significant	FALSE	TRUE	FALSE	FALSE	FALSE	TRUE	FALSE	FALSE
pcodonTAGAGT	3682	0.080032	0.00605963	0.141	0.748	0.137825	0.745753	175	0.312056	0.0255806	0.004	0.012	0.000362962	0.00448488	0.0344925	MIC not significant	FALSE	TRUE	FALSE	FALSE	FALSE	TRUE	FALSE	FALSE
pcodonTAGAGC	3682	0.073745	0.000725756	0.781	0.821	0.79196	0.829447	178	0.171729	0.0148354	0.993	0.997	0.976236	0.989723	0.105315	MIC not significant	FALSE	FALSE	FALSE	FALSE	FALSE	FALSE	FALSE	FALSE
pcodonTAGAGA	3682	0.0816881	0.00166532	0.037	0.072	0.0224275	0.0603195	133	0.345064	0.0482911	0.00157292	0.0182917	9.44826e-05	0.00867647	0.0110367	Non-monotone	FALSE	TRUE	FALSE	FALSE	FALSE	TRUE	FALSE	FALSE
pcodonTAGAGG	3682	0.0804283	0.00476176	0.29	0.771	0.28294	0.771818	293	0.213937	0.00486089	0.142	0.151	0.143813	0.162779	0.23414	MIC not significant	FALSE	FALSE	FALSE	FALSE	FALSE	FALSE	FALSE	FALSE
pcodonTAGGTC	3682	0.0809904	0.00331629	0.039	0.218	0.034124	0.219217	136	0.256617	0.0201554	0.185	0.305	0.196577	0.338322	0.0992058	MIC not significant	FALSE	FALSE	FALSE	FALSE	FALSE	FALSE	FALSE	FALSE
pcodonTAGGTG	3682	0.0843719	0.00675301	0.022	0.387	0.0165277	0.4034	211	0.216355	0.0247872	0.332	0.691	0.37299	0.712004	0.0221583	MIC not significant	FALSE	FALSE	FALSE	FALSE	FALSE	FALSE	FALSE	FALSE
pcodonTAGGCT	3682	0.0908913	0.0144541	0.000762376	0.706158	0.000213431	0.71402	307	0.188172	0.00652214	0.45	0.51	0.467186	0.541763	0.158079	MIC not significant	TRUE	FALSE	FALSE	FALSE	TRUE	FALSE	FALSE	FALSE
pcodonTAGGCC	3682	0.0846044	0.00461112	0.007	0.111	0.00464128	0.100448	176	0.207798	0.0147904	0.741	0.874	0.7579	0.854499	0.107859	MIC not significant	TRUE	FALSE	FALSE	FALSE	TRUE	FALSE	FALSE	FALSE
pcodonTAGGCA	3682	0.0831577	0.00815863	0.012	0.554	0.00695701	0.568585	120	0.26687	0.0528268	0.126	0.577	0.124541	0.603245	0.0115589	MIC not significant	TRUE	FALSE	FALSE	FALSE	TRUE	FALSE	FALSE	FALSE
pcodonTAGGCG	3682	0.084915	0.00772112	0.051	0.66	0.0471794	0.670166	321	0.249229	0.0417908	0.000356436	0.0448218	1.51034e-05	0.0346501	0.000226598	MIC not significant	FALSE	TRUE	FALSE	FALSE	FALSE	TRUE	FALSE	FALSE
pcodonTAGGAC	3682	0.0804684	0.00559415	0.039	0.702	0.028493	0.71781	59	0.253789	0.0331661	0.486	0.636	0.547638	0.678641	0.167048	MIC not significant	FALSE	FALSE	FALSE	FALSE	FALSE	FALSE	FALSE	FALSE
pcodonTAGGAA	3682	0.0812066	0.00516387	0.038	0.403	0.0333929	0.42125	111	0.30769	0.07169	0.052	0.5	0.0467635	0.531335	0.0044965	MIC not significant	FALSE	FALSE	FALSE	FALSE	FALSE	FALSE	FALSE	FALSE
pcodonTAGGAG	3682	0.0801909	0.00731432	0.075	0.802	0.0652896	0.805354	110	0.321941	0.0386559	0.027	0.102	0.0156801	0.0980941	0.039527	MIC not significant	FALSE	FALSE	FALSE	FALSE	FALSE	TRUE	FALSE	FALSE
pcodonTAGGGT	3682	0.0841709	0.0110808	0.076	0.953	0.068149	0.946102	325	0.254717	0.0169787	0.000623762	0.00369307	3.28748e-05	0.000755891	0.0187716	MIC not significant	FALSE	TRUE	FALSE	FALSE	FALSE	TRUE	FALSE	FALSE
pcodonTAGGGC	3682	0.082382	0.00545934	0.088	0.541	0.090494	0.548535	250	0.250655	0.0138951	0.011	0.023	0.00321256	0.0134129	0.0627499	MIC not significant	FALSE	TRUE	FALSE	FALSE	FALSE	TRUE	FALSE	FALSE
pcodonTAGGGA	3682	0.0839393	0.0037291	0.095	0.32	0.0820516	0.330655	318	0.208552	0.0109201	0.062	0.119	0.0497196	0.120046	0.062709	MIC not significant	FALSE	FALSE	FALSE	FALSE	FALSE	FALSE	FALSE	FALSE
pcodonTAGGGG	3682	0.0847923	0.0138013	0.044	0.992	0.0385189	0.986384	318	0.189607	0.0409418	0.278	0.967	0.313262	0.961177	0.000281584	MIC not significant	FALSE	FALSE	FALSE	FALSE	FALSE	FALSE	FALSE	FALSE
pcodonTGTTTT	3682	0.0971777	0.0261891	6.12245e-05	0.999224	9.39227e-06	0.998197	581	0.163057	0.0141981	0.159	0.561	0.16851	0.580336	0.00402501	MIC not significant	TRUE	FALSE	FALSE	FALSE	TRUE	FALSE	FALSE	FALSE
pcodonTGTTTC	3682	0.0919086	0.0173275	0.001	0.902	0.000628409	0.901516	386	0.22029	0.062263	0.003	0.798	0.00094425	0.806464	6.86107e-07	non-significant monotone/non-monotone	TRUE	TRUE	FALSE	FALSE	TRUE	TRUE	FALSE	FALSE
pcodonTGTTTA	3682	0.104571	0.0252583	0	0.575149	8.53946e-12	0.586492	447	0.195737	0.0291047	0.029	0.441	0.0185582	0.470125	0.000290748	non-significant monotone/non-monotone	TRUE	FALSE	FALSE	FALSE	TRUE	FALSE	FALSE	FALSE
pcodonTGTTTG	3682	0.100187	0.022624	0	0.846117	8.30643e-08	0.844784	549	0.172217	0.0261725	0.187	0.864	0.181231	0.853878	0.000140622	MIC not significant	TRUE	FALSE	FALSE	FALSE	TRUE	FALSE	FALSE	FALSE
pcodonTGTTCT	3682	0.0833704	0.0154777	0.094	1	0.104007	0.998394	320	0.185573	0.0313118	0.347	0.928	0.37826	0.914073	0.00148227	MIC not significant	FALSE	FALSE	FALSE	FALSE	FALSE	FALSE	FALSE	FALSE
pcodonTGTTCC	3682	0.0790267	0.0059594	0.142	0.779	0.14094	0.783725	138	0.246738	0.018853	0.232	0.359	0.231773	0.382394	0.10829	MIC not significant	FALSE	FALSE	FALSE	FALSE	FALSE	FALSE	FALSE	FALSE
pcodonTGTTCA	3682	0.0835564	0.0144898	0.026	0.985	0.0187687	0.98184	177	0.205166	0.0204473	0.761	0.916	0.763457	0.904285	0.0576034	MIC not significant	FALSE	FALSE	FALSE	FALSE	FALSE	FALSE	FALSE	FALSE
pcodonTGTTCG	3682	0.094209	0.0189098	0	0.787176	2.72461e-06	0.790946	289	0.19555	0.00516135	0.255	0.274	0.274915	0.30354	0.223374	MIC not significant	TRUE	FALSE	FALSE	FALSE	TRUE	FALSE	FALSE	FALSE
pcodonTGTTAT	3682	0.0910058	0.010262	0.002	0.243	0.000323492	0.269682	314	0.20553	0.0124019	0.091	0.215	0.0865297	0.213119	0.0486505	MIC not significant	TRUE	FALSE	FALSE	FALSE	TRUE	FALSE	FALSE	FALSE
pcodonTGTTAC	3682	0.0849134	0.0104367	0.006	0.676	0.00377651	0.677481	170	0.24829	0.0153321	0.085	0.133	0.0714056	0.138903	0.107674	MIC not significant	TRUE	FALSE	FALSE	FALSE	TRUE	FALSE	FALSE	FALSE
pcodonTGTTAA	3682	0.0865887	0.0119236	0.001	0.658	0.000733043	0.658807	171	0.258011	0.0296175	0.04	0.159	0.0264862	0.168085	0.0243995	non-significant monotone/non-monotone	TRUE	FALSE	FALSE	FALSE	TRUE	FALSE	FALSE	FALSE
pcodonTGTTAG	3682	0.0878033	0.0138334	0.003	0.802	0.00122605	0.799795	224	0.223611	0.0550492	0.134	0.917	0.128409	0.902063	0.000397898	MIC not significant	TRUE	FALSE	FALSE	FALSE	TRUE	FALSE	FALSE	FALSE
pcodonTGTTGT	3682	0.106524	0.0355888	0	0.992078	2.93348e-15	0.988124	340	0.187424	0.0374516	0.335	0.977	0.355648	0.963251	0.000331622	MIC not significant	TRUE	FALSE	FALSE	FALSE	TRUE	FALSE	FALSE	FALSE
pcodonTGTTGC	3682	0.082732	0.0074108	0.053	0.659	0.0501869	0.6646	212	0.227648	0.0139014	0.195	0.305	0.19102	0.321936	0.0867974	MIC not significant	FALSE	FALSE	FALSE	FALSE	FALSE	FALSE	FALSE	FALSE
pcodonTGTTGA	3682	0.0906966	0.013054	0.00158416	0.647257	0.000634059	0.657838	356	0.201291	0.0156408	0.056	0.176	0.0435757	0.19283	0.0182423	MIC not significant	TRUE	FALSE	FALSE	FALSE	TRUE	FALSE	FALSE	FALSE
pcodonTGTTGG	3682	0.100177	0.0241475	0	0.837784	5.59779e-09	0.837019	396	0.190075	0.0202301	0.183	0.627	0.190639	0.647012	0.00457006	MIC not significant	TRUE	FALSE	FALSE	FALSE	TRUE	FALSE	FALSE	FALSE
pcodonTGTCTT	3682	0.0907298	0.0203478	0.001	0.991	0.000253231	0.988563	307	0.208957	0.000658264	0.108	0.083	0.0878019	0.0636934	0.654311	MIC not significant	TRUE	FALSE	FALSE	FALSE	TRUE	FALSE	FALSE	FALSE
pcodonTGTCTC	3682	0.0862117	0.0104178	0.001	0.417	0.000122278	0.434748	103	0.334406	0.0804984	0.033	0.422	0.0168441	0.447216	0.00368125	non-significant monotone/non-monotone	TRUE	FALSE	FALSE	FALSE	TRUE	TRUE	FALSE	FALSE
pcodonTGTCTA	3682	0.0838465	0.0109619	0.014	0.817	0.0107038	0.830173	177	0.219098	0.0270808	0.525	0.858	0.558148	0.847632	0.0286118	MIC not significant	TRUE	FALSE	FALSE	FALSE	TRUE	FALSE	FALSE	FALSE
pcodonTGTCTG	3682	0.0881614	0.0132438	0.001	0.667	0.000384896	0.671357	190	0.251095	0.0456136	0.059	0.482	0.0525657	0.522433	0.00308946	MIC not significant	TRUE	FALSE	FALSE	FALSE	TRUE	FALSE	FALSE	FALSE
pcodonTGTCCT	3682	0.0858181	0.0110517	0.02	0.83	0.0145095	0.835244	288	0.20884	0.0102638	0.104	0.187	0.103757	0.182144	0.0861194	MIC not significant	FALSE	FALSE	FALSE	FALSE	TRUE	FALSE	FALSE	FALSE
pcodonTGTCCC	3682	0.0814693	0.00852435	0.032	0.804	0.0228331	0.794381	117	0.236977	0.0278196	0.472	0.702	0.509584	0.713936	0.072276	MIC not significant	FALSE	FALSE	FALSE	FALSE	FALSE	FALSE	FALSE	FALSE
pcodonTGTCCA	3682	0.0887749	0.014287	0.001	0.678	0.000119648	0.689648	184	0.236959	0.00989863	0.18	0.235	0.20256	0.256182	0.179041	MIC not significant	TRUE	FALSE	FALSE	FALSE	TRUE	FALSE	FALSE	FALSE
pcodonTGTCCG	3682	0.0872037	0.0139358	0.008	0.874	0.00304337	0.865444	240	0.245505	0.0144157	0.034	0.059	0.0156595	0.0470841	0.0633027	non-significant monotone/non-monotone	TRUE	FALSE	FALSE	FALSE	TRUE	TRUE	FALSE	FALSE
pcodonTGTCAT	3682	0.087055	0.0120858	0.000112245	0.576071	1.06193e-05	0.597416	82	0.407141	0.111259	0.006	0.216	0.00101147	0.2342	0.00219639	non-significant monotone/non-monotone	TRUE	TRUE	FALSE	FALSE	TRUE	TRUE	FALSE	FALSE
pcodonTGTCAC	3682	0.0769836	0.00359327	0.403	0.991	0.424336	0.967456	42	0.223695	0.007281	0.802	0.701	0.803482	0.715212	0.59107	MIC not significant	FALSE	FALSE	FALSE	FALSE	FALSE	FALSE	FALSE	FALSE
pcodonTGTCAA	3682	0.0833517	0.00951426	0.002	0.856	0.000665741	0.857741	55	0.478906	0.0840445	0.001	0.01	2.87019e-05	0.00194091	0.0317977	Non-monotone	TRUE	TRUE	FALSE	FALSE	TRUE	TRUE	FALSE	FALSE
pcodonTGTCAG	3682	0.0801188	0.00625906	0.051	0.795	0.0478054	0.7865	74	0.210804	3.81367e-05	0.89	0.806	0.872887	0.804717	0.958349	MIC not significant	FALSE	FALSE	FALSE	FALSE	FALSE	FALSE	FALSE	FALSE
pcodonTGTCGT	3682	0.0918669	0.0170997	3.06122e-05	0.728184	8.70558e-06	0.734718	222	0.207245	0.00458163	0.312	0.317	0.361459	0.359452	0.315387	MIC not significant	TRUE	FALSE	FALSE	FALSE	TRUE	FALSE	FALSE	FALSE
pcodonTGTCGC	3682	0.0795448	0.00896306	0.082	0.993	0.0725309	0.980142	71	0.247271	0.00294772	0.67	0.561	0.687224	0.595702	0.652933	MIC not significant	FALSE	FALSE	FALSE	FALSE	FALSE	FALSE	FALSE	FALSE
pcodonTGTCGA	3682	0.0839802	0.00983551	0.035	0.755	0.0227555	0.763117	209	0.228774	0.0566983	0.201	0.951	0.218195	0.933986	0.000516979	MIC not significant	FALSE	FALSE	FALSE	FALSE	FALSE	FALSE	FALSE	FALSE
pcodonTGTCGG	3682	0.0952468	0.024308	0	0.957676	2.24175e-08	0.951165	202	0.243812	0.0560233	0.105	0.871	0.109009	0.855463	0.000695175	MIC not significant	TRUE	FALSE	FALSE	FALSE	TRUE	FALSE	FALSE	FALSE
pcodonTGTATT	3682	0.106985	0.0287333	0	0.80265	5.24354e-13	0.8039	564	0.192449	0.0293261	0.002	0.227	0.00107688	0.243194	4.34836e-05	non-significant monotone/non-monotone	TRUE	TRUE	FALSE	FALSE	TRUE	TRUE	FALSE	FALSE
pcodonTGTATC	3682	0.094947	0.0122473	4.0404e-05	0.0997071	1.08629e-06	0.0958873	291	0.256327	0.0159959	0.002	0.013	0.000352503	0.00411751	0.0310149	Non-monotone	TRUE	TRUE	FALSE	FALSE	TRUE	TRUE	FALSE	FALSE
pcodonTGTATA	3682	0.0842609	0.0130932	0.061	0.988	0.0545415	0.979552	287	0.224936	0.0255375	0.024	0.142	0.0114379	0.15175	0.0066697	MIC not significant	FALSE	FALSE	FALSE	FALSE	FALSE	TRUE	FALSE	FALSE
pcodonTGTATG	3682	0.109382	0.0309879	0	0.763703	3.25946e-15	0.766854	531	0.197281	0.0145724	0.002	0.026	0.000558175	0.0134957	0.00534702	Non-monotone	TRUE	TRUE	FALSE	FALSE	TRUE	TRUE	FALSE	FALSE
pcodonTGTACT	3682	0.0967576	0.0194711	0	0.476663	1.07772e-08	0.49028	237	0.187164	0.0282537	0.805	0.995	0.818371	0.981691	0.00952875	MIC not significant	TRUE	FALSE	FALSE	FALSE	TRUE	FALSE	FALSE	FALSE
pcodonTGTACC	3682	0.0760377	0.00553734	0.477	0.959	0.504916	0.944711	163	0.243416	0.0420081	0.178	0.67	0.189465	0.68753	0.00867702	MIC not significant	FALSE	FALSE	FALSE	FALSE	FALSE	FALSE	FALSE	FALSE
pcodonTGTACA	3682	0.086381	0.00746983	0.00060396	0.116921	0.00012842	0.114163	112	0.295264	0.00656315	0.082	0.063	0.0628597	0.0538944	0.395802	MIC not significant	TRUE	FALSE	FALSE	FALSE	TRUE	FALSE	FALSE	FALSE
pcodonTGTACG	3682	0.0866632	0.0077798	0.004	0.222	0.0017351	0.223961	194	0.245429	0.0416554	0.068	0.447	0.0559111	0.483531	0.00431081	MIC not significant	TRUE	FALSE	FALSE	FALSE	TRUE	FALSE	FALSE	FALSE
pcodonTGTAAT	3682	0.0821923	0.01207	0.033	0.963	0.0259104	0.958802	144	0.35375	0.0541187	0.000166667	0.0051875	7.22536e-07	0.000875425	0.00501786	Non-monotone	FALSE	TRUE	FALSE	FALSE	FALSE	TRUE	FALSE	FALSE
pcodonTGTAAC	3682	0.0885102	0.00461583	0.000142857	0.00571429	1.64065e-05	0.00294519	131	0.283241	0.0401277	0.07	0.307	0.0617923	0.329084	0.0217856	MIC not significant	TRUE	FALSE	FALSE	FALSE	TRUE	FALSE	FALSE	FALSE
pcodonTGTAAA	3682	0.0738432	0.00370164	0.756	0.989	0.760854	0.979439	86	0.288842	0.0729059	0.236	0.83	0.258079	0.823988	0.0119295	MIC not significant	FALSE	FALSE	FALSE	FALSE	FALSE	FALSE	FALSE	FALSE
pcodonTGTAAG	3682	0.0775655	0.00269497	0.378	0.664	0.391931	0.680683	199	0.2188	0.0186445	0.223	0.452	0.246468	0.4749	0.0544691	MIC not significant	FALSE	FALSE	FALSE	FALSE	FALSE	FALSE	FALSE	FALSE
pcodonTGTAGT	3682	0.0827917	0.00850296	0.03	0.713	0.0292902	0.719484	189	0.259597	0.069291	0.033	0.755	0.0209333	0.764949	0.000252624	non-significant monotone/non-monotone	FALSE	FALSE	FALSE	FALSE	FALSE	FALSE	FALSE	FALSE
pcodonTGTAGC	3682	0.0787082	0.00478082	0.151	0.681	0.161318	0.674493	130	0.374145	0.162927	0.000350515	0.756227	5.77955e-06	0.76356	1.91686e-06	MIC not significant	FALSE	TRUE	FALSE	FALSE	FALSE	TRUE	FALSE	FALSE
pcodonTGTAGA	3682	0.0796864	0.0105392	0.167	0.993	0.171517	0.985381	196	0.263896	0.0695663	0.015	0.569	0.00476028	0.600916	0.00018749	MIC not significant	FALSE	FALSE	FALSE	FALSE	FALSE	TRUE	FALSE	FALSE
pcodonTGTAGG	3682	0.0918461	0.00884879	6.79612e-05	0.0489029	1.31658e-05	0.0436102	235	0.235897	0.0118406	0.083	0.132	0.0767712	0.141088	0.0960838	MIC not significant	TRUE	FALSE	FALSE	FALSE	TRUE	FALSE	FALSE	FALSE
pcodonTGTGTC	3682	0.0869996	0.0128288	0.007	0.875	0.00556641	0.871016	284	0.207116	0.0128929	0.127	0.246	0.130328	0.273983	0.05597	MIC not significant	TRUE	FALSE	FALSE	FALSE	TRUE	FALSE	FALSE	FALSE
pcodonTGTGTG	3682	0.0996061	0.0246779	0	0.893412	6.51843e-09	0.889853	372	0.194226	0.022499	0.124	0.521	0.12696	0.558833	0.00373502	MIC not significant	TRUE	FALSE	FALSE	FALSE	TRUE	FALSE	FALSE	FALSE
pcodonTGTGCT	3682	0.0961764	0.0233699	1.94175e-05	0.981913	3.75484e-06	0.976926	430	0.197124	0.0277291	0.051	0.5	0.0356644	0.523893	0.000525852	MIC not significant	TRUE	FALSE	FALSE	FALSE	TRUE	FALSE	FALSE	FALSE
pcodonTGTGCC	3682	0.0927506	0.0106737	4.85437e-05	0.0999223	8.33488e-06	0.0951957	255	0.227087	0.0185496	0.051	0.143	0.0338257	0.144514	0.0296789	MIC not significant	TRUE	FALSE	FALSE	FALSE	TRUE	FALSE	FALSE	FALSE
pcodonTGTGCA	3682	0.0937105	0.0147645	1.9802e-05	0.216584	1.78337e-07	0.220478	195	0.237405	0.00951462	0.085	0.118	0.0750953	0.109167	0.174911	MIC not significant	TRUE	FALSE	FALSE	FALSE	TRUE	FALSE	FALSE	FALSE
pcodonTGTGCG	3682	0.0917442	0.0141826	0.000584158	0.663535	0.000221215	0.671441	362	0.204766	0.0228499	0.058	0.362	0.0528176	0.403787	0.00394303	MIC not significant	TRUE	FALSE	FALSE	FALSE	TRUE	FALSE	FALSE	FALSE
pcodonTGTGAC	3682	0.07933	0.01033	0.112	1	0.0968801	0.9904	101	0.275162	0.0512637	0.112	0.473	0.116027	0.509754	0.0227999	MIC not significant	FALSE	FALSE	FALSE	FALSE	FALSE	FALSE	FALSE	FALSE
pcodonTGTGAA	3682	0.08868	0.0165732	0.001	0.911	0.000236593	0.909434	209	0.24166	0.027962	0.086	0.369	0.086999	0.38116	0.01552	MIC not significant	TRUE	FALSE	FALSE	FALSE	TRUE	FALSE	FALSE	FALSE
pcodonTGTGAG	3682	0.0789283	0.00742258	0.181	0.91	0.160209	0.902952	143	0.220301	0.0599874	0.482	0.991	0.537088	0.977554	0.00319641	MIC not significant	FALSE	FALSE	FALSE	FALSE	FALSE	FALSE	FALSE	FALSE
pcodonTGTGGT	3682	0.100119	0.0263259	0	0.957621	8.29349e-09	0.95165	411	0.158436	0.00862483	0.833	0.923	0.828701	0.912811	0.0599585	MIC not significant	TRUE	FALSE	FALSE	FALSE	TRUE	FALSE	FALSE	FALSE
pcodonTGTGGC	3682	0.0826909	0.0121519	0.133	0.993	0.132776	0.989914	312	0.193307	0.0514757	0.298	0.994	0.3105	0.989307	5.24744e-05	MIC not significant	FALSE	FALSE	FALSE	FALSE	FALSE	FALSE	FALSE	FALSE
pcodonTGTGGA	3682	0.0916816	0.0135512	0.002	0.629	0.000412858	0.645319	392	0.169893	0.0197315	0.478	0.878	0.505151	0.877579	0.00533481	MIC not significant	TRUE	FALSE	FALSE	FALSE	TRUE	FALSE	FALSE	FALSE
pcodonTGTGGG	3682	0.101763	0.0293078	0	0.987427	1.07675e-09	0.982901	440	0.220889	0.0212543	0.001	0.017	6.47557e-05	0.00784218	0.00217104	Non-monotone	TRUE	TRUE	FALSE	FALSE	TRUE	TRUE	FALSE	FALSE
pcodonTGCTTT	3682	0.0874294	0.00612013	0.12	0.642	0.116593	0.643493	782	0.164328	0.0301825	0.017	0.768	0.00936163	0.775693	1.02018e-06	MIC not significant	FALSE	FALSE	FALSE	FALSE	FALSE	TRUE	FALSE	FALSE
pcodonTGCTTC	3682	0.0800136	0.000438084	0.6	0.618	0.615823	0.634916	503	0.17425	0.0418663	0.107	0.988	0.0959811	0.977568	3.71714e-06	MIC not significant	FALSE	FALSE	FALSE	FALSE	FALSE	FALSE	FALSE	FALSE
pcodonTGCTTA	3682	0.0816135	0.00112126	0.594	0.676	0.602023	0.688481	664	0.188414	0.0682215	0.00046875	0.997823	3.0424e-05	0.992876	8.0977e-12	MIC not significant	FALSE	TRUE	FALSE	FALSE	FALSE	TRUE	FALSE	FALSE
pcodonTGCTTG	3682	0.0868178	0.00979093	0.089	0.88	0.0927435	0.888561	638	0.173662	0.0262086	0.035	0.6	0.0235988	0.629619	3.98664e-05	MIC not significant	FALSE	FALSE	FALSE	FALSE	FALSE	FALSE	FALSE	FALSE
pcodonTGCTCT	3682	0.0775262	0.00295652	0.628	0.862	0.632555	0.867429	311	0.200851	0.0408843	0.164	0.886	0.173	0.887485	0.000332472	MIC not significant	FALSE	FALSE	FALSE	FALSE	FALSE	FALSE	FALSE	FALSE
pcodonTGCTCC	3682	0.083002	0.00280682	0.07	0.211	0.0681807	0.219753	253	0.217279	0.0308811	0.098	0.522	0.0969982	0.553325	0.00506039	MIC not significant	FALSE	FALSE	FALSE	FALSE	FALSE	FALSE	FALSE	FALSE
pcodonTGCTCA	3682	0.0745879	0.0018511	0.626	0.803	0.645369	0.817946	111	0.313835	0.0309131	0.025	0.096	0.019427	0.0778732	0.064917	MIC not significant	FALSE	FALSE	FALSE	FALSE	FALSE	FALSE	FALSE	FALSE
pcodonTGCTCG	3682	0.0823386	0.00117426	0.21	0.292	0.222219	0.30325	372	0.230813	0.0679439	0.001	0.793	0.00026755	0.787038	3.41577e-07	MIC not significant	FALSE	TRUE	FALSE	FALSE	FALSE	TRUE	FALSE	FALSE
pcodonTGCTAT	3682	0.0751642	0.000627428	0.871	0.906	0.869874	0.889801	358	0.208653	0.0630277	0.063	0.998	0.0532005	0.984069	1.50327e-06	MIC not significant	FALSE	FALSE	FALSE	FALSE	FALSE	FALSE	FALSE	FALSE
pcodonTGCTAC	3682	0.0783667	0.00149546	0.244	0.382	0.256692	0.387152	177	0.255748	0.105246	0.104881	0.999644	0.0996442	0.996888	1.0567e-05	MIC not significant	FALSE	FALSE	FALSE	FALSE	FALSE	FALSE	FALSE	FALSE
pcodonTGCTAA	3682	0.0768635	0.00167563	0.364	0.543	0.380298	0.560622	151	0.241796	0.0493859	0.353	0.91	0.385328	0.898375	0.00609756	MIC not significant	FALSE	FALSE	FALSE	FALSE	FALSE	FALSE	FALSE	FALSE
pcodonTGCTAG	3682	0.0807362	0.00475183	0.173	0.666	0.187338	0.665058	248	0.229843	0.0535535	0.06	0.81	0.0458874	0.805285	0.000236957	MIC not significant	FALSE	FALSE	FALSE	FALSE	FALSE	FALSE	FALSE	FALSE
pcodonTGCTGT	3682	0.0848616	0.00832372	0.045	0.663	0.0309277	0.676328	294	0.243843	0.0102394	0.012	0.022	0.00345596	0.00929401	0.0832556	Non-monotone	FALSE	TRUE	FALSE	FALSE	FALSE	TRUE	FALSE	FALSE
pcodonTGCTGC	3682	0.0840013	1.39845e-06	0.099	0.087	0.0921634	0.0806633	359	0.291315	0.0682959	0	0.00776238	1.39389e-12	0.00257942	5.11739e-07	MIC not significant	FALSE	TRUE	FALSE	FALSE	FALSE	TRUE	FALSE	FALSE
pcodonTGCTGA	3682	0.0790005	3.90577e-08	0.53	0.492	0.535287	0.504268	356	0.230768	0.0580359	0.003	0.44	0.000134382	0.472794	4.27981e-06	MIC not significant	FALSE	TRUE	FALSE	FALSE	FALSE	TRUE	FALSE	FALSE
pcodonTGCTGG	3682	0.0806614	0.000944752	0.499	0.574	0.52615	0.598717	505	0.211494	0.064926	0.000206186	0.793144	6.90405e-06	0.79591	6.32249e-09	MIC not significant	FALSE	TRUE	FALSE	FALSE	FALSE	TRUE	FALSE	FALSE
pcodonTGCCTT	3682	0.0829601	5.29723e-05	0.128	0.118	0.138227	0.123557	336	0.224693	0.0715344	0.008	0.964	0.00453976	0.947282	6.51574e-07	MIC not significant	FALSE	TRUE	FALSE	FALSE	FALSE	TRUE	FALSE	FALSE
pcodonTGCCTC	3682	0.0744133	2.46627e-06	0.652	0.61	0.674007	0.637864	105	0.280505	0.00796302	0.179	0.169	0.201014	0.195003	0.36533	MIC not significant	FALSE	FALSE	FALSE	FALSE	FALSE	FALSE	FALSE	FALSE
pcodonTGCCTA	3682	0.0834094	0.000322399	0.012	0.013	0.00934543	0.00947142	151	0.23401	0.0176733	0.459	0.626	0.501944	0.64964	0.103681	MIC not significant	TRUE	FALSE	FALSE	FALSE	TRUE	FALSE	FALSE	FALSE
pcodonTGCCTG	3682	0.0724031	0.00211524	0.887	0.966	0.88179	0.958033	192	0.291109	0.12307	0.003	0.956	0.000372159	0.93336	6.07767e-07	MIC not significant	FALSE	TRUE	FALSE	FALSE	FALSE	TRUE	FALSE	FALSE
pcodonTGCCCT	3682	0.0789032	0.000936396	0.355	0.432	0.367826	0.444768	259	0.237764	0.0433539	0.051	0.547	0.0396889	0.593791	0.000746947	MIC not significant	FALSE	FALSE	FALSE	FALSE	FALSE	FALSE	FALSE	FALSE
pcodonTGCCCC	3682	0.0737641	7.62166e-08	0.779	0.73	0.768015	0.736873	95	0.229068	0.00470936	0.66	0.587	0.674324	0.61146	0.508743	MIC not significant	FALSE	FALSE	FALSE	FALSE	FALSE	FALSE	FALSE	FALSE
pcodonTGCCCA	3682	0.0758829	0.00131265	0.466	0.638	0.497334	0.654285	79	0.293953	0.112141	0.132	0.92	0.122784	0.902414	0.00255624	MIC not significant	FALSE	FALSE	FALSE	FALSE	FALSE	FALSE	FALSE	FALSE
pcodonTGCCCG	3682	0.0729863	4.45857e-05	0.848	0.841	0.849947	0.836295	175	0.224991	0.00247502	0.465	0.413	0.504345	0.449939	0.513232	MIC not significant	FALSE	FALSE	FALSE	FALSE	FALSE	FALSE	FALSE	FALSE
pcodonTGCCAC	3682	0.0770433	0.000420208	0.355	0.396	0.401279	0.437541	41	0.240335	0.105682	0.707	0.994	0.729138	0.977959	0.0385989	MIC not significant	FALSE	FALSE	FALSE	FALSE	FALSE	FALSE	FALSE	FALSE
pcodonTGCCAG	3682	0.0724927	0.00017189	0.921	0.919	0.903638	0.900022	82	0.330127	0.0185118	0.11	0.124	0.0988579	0.126451	0.222913	MIC not significant	FALSE	FALSE	FALSE	FALSE	FALSE	FALSE	FALSE	FALSE
pcodonTGCCGT	3682	0.0749535	0.00196329	0.673	0.844	0.679515	0.836734	182	0.213587	0.0220176	0.551	0.825	0.593827	0.818058	0.0455986	MIC not significant	FALSE	FALSE	FALSE	FALSE	FALSE	FALSE	FALSE	FALSE
pcodonTGCCGC	3682	0.0788777	0.00432196	0.114	0.641	0.122258	0.648709	82	0.319951	0.103353	0.141	0.879	0.14339	0.864516	0.00322852	MIC not significant	FALSE	FALSE	FALSE	FALSE	FALSE	FALSE	FALSE	FALSE
pcodonTGCCGA	3682	0.0788468	0.00693979	0.214	0.905	0.219773	0.892415	164	0.220684	0.0454308	0.428	0.94	0.465047	0.92622	0.00613884	MIC not significant	FALSE	FALSE	FALSE	FALSE	FALSE	FALSE	FALSE	FALSE
pcodonTGCCGG	3682	0.0740279	0.00275444	0.711	0.921	0.722283	0.916451	153	0.217656	0.030345	0.668	0.95	0.702917	0.921974	0.0312766	MIC not significant	FALSE	FALSE	FALSE	FALSE	FALSE	FALSE	FALSE	FALSE
pcodonTGCATT	3682	0.0864125	0.000267419	0.07	0.073	0.0647961	0.0644041	542	0.231578	0.0435227	0	0.00527	4.73637e-11	0.00168628	9.59917e-07	MIC not significant	FALSE	TRUE	FALSE	FALSE	FALSE	TRUE	FALSE	FALSE
pcodonTGCATC	3682	0.0840157	0.000114648	0.065	0.062	0.0677439	0.0621173	305	0.269395	0.0579715	8.91089e-05	0.0680099	1.09235e-06	0.0584083	2.13446e-05	MIC not significant	FALSE	TRUE	FALSE	FALSE	FALSE	TRUE	FALSE	FALSE
pcodonTGCATA	3682	0.0762239	0.00169413	0.665	0.819	0.680651	0.816343	257	0.213475	0.064708	0.1	0.992	0.101644	0.977467	3.68833e-05	MIC not significant	FALSE	FALSE	FALSE	FALSE	FALSE	FALSE	FALSE	FALSE
pcodonTGCATG	3682	0.0781843	0.00221471	0.819	0.937	0.824014	0.93187	574	0.157218	0.0101998	0.402	0.707	0.425771	0.717249	0.0154967	MIC not significant	FALSE	FALSE	FALSE	FALSE	FALSE	FALSE	FALSE	FALSE
pcodonTGCACT	3682	0.0738687	0.00150496	0.775	0.875	0.765845	0.864093	182	0.267827	0.0407913	0.04	0.274	0.0234413	0.293548	0.00625386	MIC not significant	FALSE	FALSE	FALSE	FALSE	FALSE	FALSE	FALSE	FALSE
pcodonTGCACC	3682	0.0749224	0.000963983	0.604	0.682	0.614162	0.696605	141	0.341615	0.0640417	0.001	0.027	1.33617e-05	0.0155767	0.00246448	MIC not significant	FALSE	TRUE	FALSE	FALSE	FALSE	TRUE	FALSE	FALSE
pcodonTGCACA	3682	0.0772509	0.00232349	0.326	0.683	0.344473	0.697429	63	0.275248	0.00103908	0.616	0.493	0.652167	0.531038	0.80197	MIC not significant	FALSE	FALSE	FALSE	FALSE	FALSE	FALSE	FALSE	FALSE
pcodonTGCACG	3682	0.081243	0.00013861	0.1	0.095	0.0876379	0.0812484	196	0.205073	0.0288192	0.486	0.865	0.514718	0.863505	0.0173709	MIC not significant	FALSE	FALSE	FALSE	FALSE	FALSE	FALSE	FALSE	FALSE
pcodonTGCAAT	3682	0.0805461	0.00505672	0.063	0.494	0.0671841	0.510989	140	0.238887	0.0332233	0.282	0.615	0.308054	0.658914	0.0311279	MIC not significant	FALSE	FALSE	FALSE	FALSE	FALSE	FALSE	FALSE	FALSE
pcodonTGCAAC	3682	0.0801933	0.000622005	0.08	0.095	0.0726431	0.0866851	123	0.268016	0.000107205	0.103	0.07	0.0823846	0.048985	0.909506	MIC not significant	FALSE	FALSE	FALSE	FALSE	FALSE	FALSE	FALSE	FALSE
pcodonTGCAAA	3682	0.0692451	0.00154469	0.994	1	0.99061	0.997605	94	0.194992	0.0766559	0.947584	0.999891	0.923511	0.999438	0.0069039	MIC not significant	FALSE	FALSE	FALSE	FALSE	FALSE	FALSE	FALSE	FALSE
pcodonTGCAAG	3682	0.0774793	0.00640563	0.663	0.984	0.672803	0.985061	332	0.171781	0.029533	0.77	0.997	0.771029	0.98966	0.0016729	MIC not significant	FALSE	FALSE	FALSE	FALSE	FALSE	FALSE	FALSE	FALSE
pcodonTGCAGT	3682	0.0819287	0.00302138	0.031	0.14	0.0213438	0.135278	116	0.290361	0.0402179	0.061	0.238	0.0498963	0.251334	0.030888	MIC not significant	FALSE	FALSE	FALSE	FALSE	FALSE	FALSE	FALSE	FALSE
pcodonTGCAGC	3682	0.073626	0.000737204	0.774	0.805	0.778995	0.819775	149	0.294978	0.0387305	0.034	0.188	0.0271408	0.200397	0.0161459	MIC not significant	FALSE	FALSE	FALSE	FALSE	FALSE	FALSE	FALSE	FALSE
pcodonTGCAGA	3682	0.077989	0.000151325	0.235	0.219	0.242601	0.227111	129	0.264711	0.0191573	0.194	0.314	0.212976	0.334957	0.117753	MIC not significant	FALSE	FALSE	FALSE	FALSE	FALSE	FALSE	FALSE	FALSE
pcodonTGCAGG	3682	0.0803561	9.53045e-05	0.235	0.22	0.227678	0.211495	254	0.290214	0.101731	5.94059e-05	0.49502	2.05099e-07	0.525091	2.0527e-07	MIC not significant	FALSE	TRUE	FALSE	FALSE	FALSE	TRUE	FALSE	FALSE
pcodonTGCGTC	3682	0.0792929	0.00333168	0.191	0.507	0.191601	0.52404	184	0.272587	0.0888659	0.019	0.871	0.00893205	0.868283	3.9573e-05	MIC not significant	FALSE	FALSE	FALSE	FALSE	FALSE	TRUE	FALSE	FALSE
pcodonTGCGTG	3682	0.0751237	0.00169778	0.698	0.814	0.702706	0.829989	208	0.246318	0.027655	0.076	0.271	0.0629136	0.302505	0.0163652	MIC not significant	FALSE	FALSE	FALSE	FALSE	FALSE	FALSE	FALSE	FALSE
pcodonTGCGCT	3682	0.0780651	0.00500121	0.35	0.839	0.362058	0.84691	207	0.246725	0.0276804	0.073	0.3	0.0668231	0.313569	0.0165779	MIC not significant	FALSE	FALSE	FALSE	FALSE	FALSE	FALSE	FALSE	FALSE
pcodonTGCGCC	3682	0.0729161	0.00033386	0.867	0.873	0.863664	0.868276	187	0.261297	0.0961239	0.04	0.976	0.0249172	0.969655	1.57326e-05	MIC not significant	FALSE	FALSE	FALSE	FALSE	FALSE	FALSE	FALSE	FALSE
pcodonTGCGCA	3682	0.0736945	0.000481152	0.765	0.795	0.775831	0.799673	86	0.207918	3.43264e-05	0.949	0.89	0.927769	0.869686	0.957303	MIC not significant	FALSE	FALSE	FALSE	FALSE	FALSE	FALSE	FALSE	FALSE
pcodonTGCGCG	3682	0.0816689	0.002623	0.149	0.325	0.14154	0.353463	282	0.19897	0.0401995	0.258	0.941	0.278472	0.926156	0.000708081	MIC not significant	FALSE	FALSE	FALSE	FALSE	FALSE	FALSE	FALSE	FALSE
pcodonTGCGAC	3682	0.0762742	0.000434136	0.445	0.476	0.4726	0.498714	71	0.209891	0.0463593	0.94	0.997	0.91208	0.98294	0.0713468	MIC not significant	FALSE	FALSE	FALSE	FALSE	FALSE	FALSE	FALSE	FALSE
pcodonTGCGAA	3682	0.0786598	0.000116151	0.183	0.17	0.17808	0.162211	140	0.322384	0.102755	0.004	0.469	0.000299207	0.50116	0.000112814	MIC not significant	FALSE	TRUE	FALSE	FALSE	FALSE	TRUE	FALSE	FALSE
pcodonTGCGAG	3682	0.0794819	0.000105879	0.113	0.096	0.100392	0.0903766	118	0.302244	0.0956537	0.023	0.69	0.0102247	0.703877	0.000654842	MIC not significant	FALSE	FALSE	FALSE	FALSE	FALSE	TRUE	FALSE	FALSE
pcodonTGCGGT	3682	0.0756047	0.00197452	0.825	0.933	0.828382	0.923212	337	0.190142	0.0144382	0.331	0.579	0.334715	0.610411	0.0274101	MIC not significant	FALSE	FALSE	FALSE	FALSE	FALSE	FALSE	FALSE	FALSE
pcodonTGCGGC	3682	0.0761405	5.93151e-05	0.705	0.679	0.715152	0.695725	256	0.283063	0.0800795	9.90099e-05	0.200782	7.89279e-07	0.213244	4.22606e-06	MIC not significant	FALSE	TRUE	FALSE	FALSE	FALSE	TRUE	FALSE	FALSE
pcodonTGCGGA	3682	0.0755501	7.51944e-05	0.868	0.86	0.870125	0.859285	353	0.225453	0.044467	0.002	0.261	0.000396032	0.270539	6.52807e-05	MIC not significant	FALSE	TRUE	FALSE	FALSE	FALSE	TRUE	FALSE	FALSE
pcodonTGCGGG	3682	0.0818851	0.0027325	0.189	0.416	0.190874	0.425927	326	0.237317	0.0472067	0.001	0.348	0.00130047	0.366428	7.64675e-05	MIC not significant	FALSE	TRUE	FALSE	FALSE	FALSE	TRUE	FALSE	FALSE
pcodonTGATTT	3682	0.087996	0.00884078	0.08	0.808	0.0766522	0.815397	797	0.169153	0.0362312	0.00311458	0.728437	0.000749861	0.73696	6.13534e-08	MIC not significant	FALSE	TRUE	FALSE	FALSE	FALSE	TRUE	FALSE	FALSE
pcodonTGATTC	3682	0.0826448	0.00515725	0.287	0.802	0.305404	0.802956	480	0.220227	0.0887585	0.001	0.997	1.04049e-05	0.992127	2.70058e-11	MIC not significant	FALSE	TRUE	FALSE	FALSE	FALSE	TRUE	FALSE	FALSE
pcodonTGATTA	3682	0.07921	0.00264973	0.728	0.902	0.736101	0.90276	568	0.184332	0.0231904	0.011	0.242	0.00610121	0.256928	0.000269883	MIC not significant	FALSE	TRUE	FALSE	FALSE	FALSE	TRUE	FALSE	FALSE
pcodonTGATTG	3682	0.108922	0.0191083	0	0.0190097	7.27186e-14	0.0148656	668	0.161452	0.0269524	0.074	0.862	0.0724034	0.864965	2.00663e-05	MIC not significant	TRUE	FALSE	FALSE	FALSE	TRUE	FALSE	FALSE	FALSE
pcodonTGATCT	3682	0.0823241	0.00410138	0.222	0.595	0.212878	0.611822	364	0.185852	0.0166583	0.322	0.689	0.356814	0.710877	0.0137285	MIC not significant	FALSE	FALSE	FALSE	FALSE	FALSE	FALSE	FALSE	FALSE
pcodonTGATCC	3682	0.0818985	0.000214157	0.128	0.125	0.114955	0.113329	249	0.282965	0.106577	0.000316832	0.784752	3.79949e-06	0.785674	1.35937e-07	MIC not significant	FALSE	TRUE	FALSE	FALSE	FALSE	TRUE	FALSE	FALSE
pcodonTGATCA	3682	0.0838707	0.0032072	0.018	0.1	0.0144785	0.0986056	184	0.267619	0.0620337	0.031	0.575	0.0149181	0.596822	0.000651165	non-significant monotone/non-monotone	FALSE	FALSE	FALSE	FALSE	TRUE	TRUE	FALSE	FALSE
pcodonTGATCG	3682	0.0815015	0.000254345	0.314	0.326	0.331836	0.330351	414	0.201128	0.0477498	0.036	0.867	0.0180321	0.857631	7.22105e-06	MIC not significant	FALSE	FALSE	FALSE	FALSE	FALSE	TRUE	FALSE	FALSE
pcodonTGATAT	3682	0.0803969	0.00125035	0.433	0.531	0.433447	0.539704	401	0.197508	0.0456131	0.068	0.947	0.0585291	0.934427	1.60838e-05	MIC not significant	FALSE	FALSE	FALSE	FALSE	FALSE	FALSE	FALSE	FALSE
pcodonTGATAC	3682	0.0788467	0.00182532	0.363	0.548	0.38042	0.564466	251	0.2397	0.0628218	0.02	0.779	0.00958388	0.774793	5.93482e-05	MIC not significant	FALSE	FALSE	FALSE	FALSE	FALSE	TRUE	FALSE	FALSE
pcodonTGATAA	3682	0.0845133	0.00851092	0.01	0.49	0.00611954	0.513336	184	0.246739	0.0688272	0.111	0.943	0.105874	0.918941	0.000321102	MIC not significant	TRUE	FALSE	FALSE	FALSE	TRUE	FALSE	FALSE	FALSE
pcodonTGATAG	3682	0.0844489	0.00389865	0.098	0.364	0.0936532	0.37706	385	0.23199	0.0757963	0.002	0.814	4.34506e-05	0.819722	3.99888e-08	MIC not significant	FALSE	TRUE	FALSE	FALSE	FALSE	TRUE	FALSE	FALSE
pcodonTGATGT	3682	0.100624	0.0226701	0	0.552827	1.99166e-10	0.565185	315	0.18738	0.0490817	0.367	0.999	0.398807	0.992914	7.31583e-05	MIC not significant	TRUE	FALSE	FALSE	FALSE	TRUE	FALSE	FALSE	FALSE
pcodonTGATGC	3682	0.0788792	0.00112757	0.45	0.541	0.485757	0.579708	310	0.266912	0.12449	9.375e-05	0.997344	6.30305e-07	0.990552	1.61654e-10	MIC not significant	FALSE	TRUE	FALSE	FALSE	FALSE	TRUE	FALSE	FALSE
pcodonTGATGA	3682	0.0851692	0.00513406	0.068	0.417	0.0649453	0.438317	399	0.270368	0.0393503	0	0.00055	3.8837e-11	3.48649e-05	6.61555e-05	MIC not significant	FALSE	TRUE	FALSE	FALSE	FALSE	TRUE	FALSE	FALSE
pcodonTGATGG	3682	0.0879003	0.00464465	0.031	0.245	0.0263448	0.245278	525	0.152999	0.0175982	0.728	0.982	0.728844	0.971566	0.00232056	MIC not significant	FALSE	FALSE	FALSE	FALSE	FALSE	FALSE	FALSE	FALSE
pcodonTGACTT	3682	0.0783634	0.00187563	0.715	0.848	0.723547	0.847443	466	0.216342	0.0611611	0.001	0.648	9.21063e-06	0.662037	6.35412e-08	MIC not significant	FALSE	TRUE	FALSE	FALSE	FALSE	TRUE	FALSE	FALSE
pcodonTGACTC	3682	0.0783983	0.000129818	0.164	0.144	0.163144	0.150156	108	0.283244	0.0595307	0.169	0.69	0.178784	0.707353	0.0109376	MIC not significant	FALSE	FALSE	FALSE	FALSE	FALSE	FALSE	FALSE	FALSE
pcodonTGACTA	3682	0.0766051	0.00120363	0.445	0.571	0.452166	0.567601	177	0.280976	0.0218007	0.024	0.058	0.012075	0.0485035	0.0498548	MIC not significant	FALSE	FALSE	FALSE	FALSE	FALSE	TRUE	FALSE	FALSE
pcodonTGACTG	3682	0.080158	0.00616627	0.214	0.832	0.223909	0.833165	236	0.209541	0.0133005	0.343	0.533	0.378729	0.561975	0.0770279	MIC not significant	FALSE	FALSE	FALSE	FALSE	FALSE	FALSE	FALSE	FALSE
pcodonTGACCT	3682	0.0796493	0.00015571	0.382	0.372	0.396806	0.385341	301	0.260248	0.103496	0.000625	0.971625	2.55011e-05	0.956541	1.12493e-08	MIC not significant	FALSE	TRUE	FALSE	FALSE	FALSE	TRUE	FALSE	FALSE
pcodonTGACCC	3682	0.0841835	0.000917756	0.006	0.009	0.00430114	0.00748006	147	0.231773	0.0293567	0.279	0.63	0.327224	0.642364	0.0379868	MIC not significant	TRUE	FALSE	FALSE	FALSE	TRUE	FALSE	FALSE	FALSE
pcodonTGACCA	3682	0.0760185	0.000989171	0.46	0.575	0.486553	0.592417	90	0.194763	0.00735264	0.982	0.967	0.952504	0.942447	0.421638	MIC not significant	FALSE	FALSE	FALSE	FALSE	FALSE	FALSE	FALSE	FALSE
pcodonTGACCG	3682	0.0794738	0.000333211	0.325	0.344	0.33705	0.34193	266	0.225051	0.0453599	0.078	0.753	0.06829	0.758134	0.000469763	MIC not significant	FALSE	FALSE	FALSE	FALSE	FALSE	FALSE	FALSE	FALSE
pcodonTGACAT	3682	0.0784367	0.00286269	0.107	0.639	0.110678	0.680418	40	0.407903	0.0274478	0.03	0.027	0.0157447	0.0171952	0.306938	MIC not significant	FALSE	FALSE	FALSE	FALSE	FALSE	TRUE	FALSE	FALSE
pcodonTGACAG	3682	0.0748486	0.000169342	0.604	0.594	0.621048	0.60921	100	0.219692	0.00218341	0.66	0.556	0.682381	0.597367	0.644334	MIC not significant	FALSE	FALSE	FALSE	FALSE	FALSE	FALSE	FALSE	FALSE
pcodonTGACGT	3682	0.0819531	0.00570885	0.18	0.709	0.180283	0.728533	317	0.254046	0.0612184	0.001	0.168	1.8894e-06	0.169731	8.29809e-06	MIC not significant	FALSE	TRUE	FALSE	FALSE	FALSE	TRUE	FALSE	FALSE
pcodonTGACGC	3682	0.0838774	0.00335826	0.004	0.052	0.00288277	0.0437342	111	0.332857	0.0141889	0.008	0.014	0.00271866	0.00448225	0.213055	Non-monotone	TRUE	TRUE	FALSE	FALSE	TRUE	TRUE	FALSE	FALSE
pcodonTGACGA	3682	0.0817808	0.00155731	0.116	0.2	0.115696	0.205742	255	0.1985	0.0192454	0.309	0.648	0.329979	0.662854	0.0267501	MIC not significant	FALSE	FALSE	FALSE	FALSE	FALSE	FALSE	FALSE	FALSE
pcodonTGACGG	3682	0.0829064	0.00841513	0.121	0.86	0.10922	0.860287	307	0.210054	0.0275412	0.093	0.506	0.0868304	0.543401	0.00354371	MIC not significant	FALSE	FALSE	FALSE	FALSE	FALSE	FALSE	FALSE	FALSE
pcodonTGAATT	3682	0.0877942	0.00828605	0.092	0.813	0.0868291	0.806612	818	0.154601	0.0290926	0.034	0.878	0.023351	0.872013	9.25603e-07	MIC not significant	FALSE	FALSE	FALSE	FALSE	FALSE	FALSE	FALSE	FALSE
pcodonTGAATC	3682	0.0828041	0.00467432	0.241	0.717	0.252887	0.718892	449	0.229994	0.0561358	8.33333e-05	0.222875	9.09594e-07	0.236006	3.79513e-07	MIC not significant	FALSE	TRUE	FALSE	FALSE	FALSE	TRUE	FALSE	FALSE
pcodonTGAATA	3682	0.0881415	0.0105885	0.013	0.643	0.00623031	0.662844	350	0.168744	0.0183216	0.693	0.962	0.720734	0.947164	0.0112472	MIC not significant	TRUE	FALSE	FALSE	FALSE	TRUE	FALSE	FALSE	FALSE
pcodonTGAATG	3682	0.0933425	0.010737	0.002	0.456	0.00133658	0.464192	740	0.167944	0.0159043	0.013	0.169	0.00681859	0.168494	0.000584822	non-significant monotone/non-monotone	TRUE	TRUE	FALSE	FALSE	TRUE	TRUE	FALSE	FALSE
pcodonTGAACT	3682	0.0868105	0.004804	0.039	0.259	0.0306335	0.272685	421	0.214295	0.0429655	0.002	0.34	0.00056633	0.370219	1.81054e-05	non-significant monotone/non-monotone	FALSE	TRUE	FALSE	FALSE	FALSE	TRUE	FALSE	FALSE
pcodonTGAACC	3682	0.0781436	0.000559944	0.548	0.587	0.556509	0.586428	297	0.253013	0.0561734	0.007	0.278	0.000265784	0.315084	3.68704e-05	MIC not significant	FALSE	TRUE	FALSE	FALSE	FALSE	TRUE	FALSE	FALSE
pcodonTGAACA	3682	0.0775725	0.00100519	0.32	0.396	0.343775	0.426305	169	0.285802	0.0603688	0.004	0.221	0.00131507	0.224284	0.00128233	MIC not significant	FALSE	TRUE	FALSE	FALSE	FALSE	TRUE	FALSE	FALSE
pcodonTGAACG	3682	0.0816122	0.000448569	0.418	0.439	0.433101	0.450696	491	0.194356	0.0443202	0.008	0.779	0.00397651	0.783553	2.5282e-06	MIC not significant	FALSE	TRUE	FALSE	FALSE	FALSE	TRUE	FALSE	FALSE
pcodonTGAAAT	3682	0.0830679	0.00307603	0.095	0.272	0.0964088	0.292458	271	0.242569	0.0221272	0.01	0.06	0.0041087	0.0518592	0.0142419	MIC not significant	FALSE	TRUE	FALSE	FALSE	FALSE	TRUE	FALSE	FALSE
pcodonTGAAAC	3682	0.0732693	0.00178443	0.895	0.96	0.892503	0.953228	242	0.225003	0.0608793	0.105	0.942	0.0978878	0.932342	0.000105062	MIC not significant	FALSE	FALSE	FALSE	FALSE	FALSE	FALSE	FALSE	FALSE
pcodonTGAAAA	3682	0.0753445	0.00340422	0.552	0.874	0.558501	0.87332	146	0.293929	0.0855747	0.012	0.548	0.00412839	0.577389	0.000339678	MIC not significant	FALSE	TRUE	FALSE	FALSE	FALSE	TRUE	FALSE	FALSE
pcodonTGAAAG	3682	0.0850994	0.000628743	0.092	0.107	0.0893864	0.105033	467	0.212307	0.0394425	0.002	0.131	3.21121e-05	0.139188	1.53607e-05	MIC not significant	FALSE	TRUE	FALSE	FALSE	FALSE	TRUE	FALSE	FALSE
pcodonTGAAGT	3682	0.0821879	0.00643852	0.12	0.703	0.111899	0.71613	271	0.272863	0.0794218	0.000455446	0.415208	1.3543e-05	0.445206	2.4318e-06	MIC not significant	FALSE	TRUE	FALSE	FALSE	FALSE	TRUE	FALSE	FALSE
pcodonTGAAGC	3682	0.0763218	9.62662e-05	0.639	0.622	0.656939	0.640877	249	0.253556	0.0442664	0.008	0.173	0.0016119	0.189788	0.000835499	MIC not significant	FALSE	TRUE	FALSE	FALSE	FALSE	TRUE	FALSE	FALSE
pcodonTGAAGA	3682	0.0756212	0.00328429	0.648	0.896	0.657165	0.901043	219	0.256194	0.0715148	0.012	0.732	0.00625657	0.751249	6.12131e-05	MIC not significant	FALSE	TRUE	FALSE	FALSE	FALSE	TRUE	FALSE	FALSE
pcodonTGAAGG	3682	0.0744541	0.00068597	0.956	0.967	0.951349	0.962921	452	0.165268	0.0238451	0.449	0.969	0.494582	0.956555	0.000988894	MIC not significant	FALSE	FALSE	FALSE	FALSE	FALSE	FALSE	FALSE	FALSE
pcodonTGAGTC	3682	0.071436	0.000804612	0.959	0.977	0.954598	0.968201	225	0.221655	0.00729638	0.118	0.147	0.115091	0.142075	0.201786	MIC not significant	FALSE	FALSE	FALSE	FALSE	FALSE	FALSE	FALSE	FALSE
pcodonTGAGTG	3682	0.0870828	0.0103672	0.008	0.657	0.00698647	0.657225	293	0.223076	0.0518296	0.062	0.88	0.0499697	0.87238	8.42318e-05	MIC not significant	TRUE	FALSE	FALSE	FALSE	TRUE	FALSE	FALSE	FALSE
pcodonTGAGCT	3682	0.0827089	0.00254116	0.234	0.469	0.249363	0.488102	444	0.216619	0.0825538	0.00145833	0.997823	0.000172619	0.992002	6.92898e-10	MIC not significant	FALSE	TRUE	FALSE	FALSE	FALSE	TRUE	FALSE	FALSE
pcodonTGAGCC	3682	0.0816357	0.0020705	0.185	0.314	0.181491	0.354535	302	0.281221	0.1135	6.12245e-05	0.8495	5.07361e-08	0.844151	1.89126e-09	MIC not significant	FALSE	TRUE	FALSE	FALSE	FALSE	TRUE	FALSE	FALSE
pcodonTGAGCA	3682	0.0787172	0.000518598	0.296	0.308	0.294176	0.316552	207	0.298961	0.0884329	0.002	0.416	9.85867e-05	0.448762	1.35243e-05	MIC not significant	FALSE	TRUE	FALSE	FALSE	FALSE	TRUE	FALSE	FALSE
pcodonTGAGCG	3682	0.0842368	0.00488445	0.233	0.688	0.221431	0.699824	539	0.246824	0.122379	0	0.9986	6.29621e-15	0.993957	5.82412e-17	MIC not significant	FALSE	TRUE	FALSE	FALSE	FALSE	TRUE	FALSE	FALSE
pcodonTGAGAC	3682	0.07557	0.00491872	0.507	0.969	0.527656	0.958662	88	0.320114	0.0633421	0.08	0.404	0.0649379	0.434164	0.0180102	MIC not significant	FALSE	FALSE	FALSE	FALSE	FALSE	FALSE	FALSE	FALSE
pcodonTGAGAA	3682	0.072134	0.000124882	0.891	0.881	0.887554	0.879881	159	0.274449	0.0884137	0.038	0.922	0.0258975	0.896458	0.000141095	MIC not significant	FALSE	FALSE	FALSE	FALSE	FALSE	FALSE	FALSE	FALSE
pcodonTGAGAG	3682	0.0828772	0.00198246	0.02	0.049	0.0109993	0.0395069	138	0.27775	0.0551897	0.066	0.477	0.0557303	0.520792	0.00554457	MIC not significant	FALSE	FALSE	FALSE	FALSE	TRUE	FALSE	FALSE	FALSE
pcodonTGAGGT	3682	0.0849768	0.00249461	0.05	0.14	0.0426712	0.140248	324	0.214304	0.0454271	0.077	0.839	0.0653359	0.82994	0.000110571	MIC not significant	FALSE	FALSE	FALSE	FALSE	FALSE	FALSE	FALSE	FALSE
pcodonTGAGGC	3682	0.0779373	0.000378373	0.49	0.503	0.499854	0.514527	256	0.202065	0.0438287	0.249	0.956	0.27987	0.93927	0.000749818	MIC not significant	FALSE	FALSE	FALSE	FALSE	FALSE	FALSE	FALSE	FALSE
pcodonTGAGGA	3682	0.0775827	1.44765e-05	0.713	0.69	0.717739	0.69344	396	0.209427	0.0490957	0.015	0.83	0.00824532	0.834008	8.55495e-06	MIC not significant	FALSE	FALSE	FALSE	FALSE	FALSE	TRUE	FALSE	FALSE
pcodonTGAGGG	3682	0.0888785	0.00861111	0.022	0.533	0.0158951	0.548932	497	0.174562	0.0332611	0.123	0.93	0.120824	0.910921	4.31525e-05	MIC not significant	FALSE	FALSE	FALSE	FALSE	FALSE	FALSE	FALSE	FALSE
pcodonTGGTTT	3682	0.0789353	0.0050717	0.843	0.995	0.840561	0.990784	689	0.171088	0.0325396	0.025	0.787	0.0145422	0.786522	1.88382e-06	MIC not significant	FALSE	FALSE	FALSE	FALSE	FALSE	TRUE	FALSE	FALSE
pcodonTGGTTC	3682	0.0733904	0.00117094	0.979	0.986	0.976154	0.987374	443	0.224865	0.0641839	0.00042268	0.662237	1.80028e-05	0.677815	6.45641e-08	MIC not significant	FALSE	TRUE	FALSE	FALSE	FALSE	TRUE	FALSE	FALSE
pcodonTGGTTA	3682	0.0790767	0.00162976	0.719	0.832	0.719603	0.829557	515	0.165071	0.0217145	0.405	0.949	0.428038	0.917698	0.000795666	MIC not significant	FALSE	FALSE	FALSE	FALSE	FALSE	FALSE	FALSE	FALSE
pcodonTGGTTG	3682	0.102434	0.0177284	0	0.19652	7.94895e-09	0.19896	610	0.208209	0.0198952	3.9604e-05	0.0020099	1.77929e-07	0.000311986	0.000475802	Non-monotone	TRUE	TRUE	FALSE	FALSE	TRUE	TRUE	TRUE	FALSE
pcodonTGGTCT	3682	0.0828274	0.0023113	0.148	0.308	0.14465	0.310505	331	0.19705	0.0228048	0.224	0.673	0.242597	0.683647	0.00590804	MIC not significant	FALSE	FALSE	FALSE	FALSE	FALSE	FALSE	FALSE	FALSE
pcodonTGGTCC	3682	0.0752452	5.47022e-05	0.818	0.809	0.81739	0.802512	295	0.245393	0.0379003	0.002	0.18	0.00194522	0.166411	0.000774456	MIC not significant	FALSE	TRUE	FALSE	FALSE	FALSE	TRUE	FALSE	FALSE
pcodonTGGTCA	3682	0.0824691	0.00525657	0.025	0.315	0.0211112	0.322425	160	0.226475	0.00942103	0.425	0.471	0.453607	0.501117	0.222084	MIC not significant	FALSE	FALSE	FALSE	FALSE	FALSE	FALSE	FALSE	FALSE
pcodonTGGTCG	3682	0.0832985	0.00361618	0.187	0.502	0.197674	0.527651	448	0.188607	0.019285	0.06	0.348	0.0528859	0.369608	0.0032253	MIC not significant	FALSE	FALSE	FALSE	FALSE	FALSE	FALSE	FALSE	FALSE
pcodonTGGTAT	3682	0.0788482	0.00124769	0.546	0.659	0.56521	0.669702	395	0.205887	0.0275427	0.029	0.354	0.0212225	0.389664	0.000929885	MIC not significant	FALSE	FALSE	FALSE	FALSE	FALSE	FALSE	FALSE	FALSE
pcodonTGGTAC	3682	0.0857754	0.00593742	0.005	0.132	0.00262997	0.130443	173	0.23302	0.049345	0.37	0.957	0.411935	0.93234	0.0033101	MIC not significant	TRUE	FALSE	FALSE	FALSE	TRUE	FALSE	FALSE	FALSE
pcodonTGGTAA	3682	0.0860316	0.00731378	0.004	0.215	0.00193495	0.219624	186	0.201312	0.00898494	0.696	0.766	0.71039	0.765606	0.198118	MIC not significant	TRUE	FALSE	FALSE	FALSE	TRUE	FALSE	FALSE	FALSE
pcodonTGGTAG	3682	0.0792691	0.00669645	0.335	0.923	0.340084	0.922643	250	0.23794	0.0293263	0.027	0.205	0.0181276	0.205337	0.00664366	MIC not significant	FALSE	FALSE	FALSE	FALSE	FALSE	TRUE	FALSE	FALSE
pcodonTGGTGT	3682	0.104112	0.026449	0	0.676693	1.88878e-12	0.685383	381	0.19212	0.0431338	0.115	0.955	0.108024	0.93978	4.40397e-05	MIC not significant	TRUE	FALSE	FALSE	FALSE	TRUE	FALSE	FALSE	FALSE
pcodonTGGTGC	3682	0.0815758	0.00258893	0.346	0.572	0.330518	0.589701	417	0.196606	0.0351338	0.043	0.636	0.0334462	0.671	0.00011796	MIC not significant	FALSE	FALSE	FALSE	FALSE	FALSE	FALSE	FALSE	FALSE
pcodonTGGTGA	3682	0.0795501	0.00369891	0.455	0.835	0.489104	0.828451	367	0.244079	0.0364359	0.001	0.03	1.20851e-05	0.0206535	0.000234911	MIC not significant	FALSE	TRUE	FALSE	FALSE	FALSE	TRUE	FALSE	FALSE
pcodonTGGTGG	3682	0.0963634	0.00629519	0.00020202	0.0146566	4.01304e-05	0.0111959	640	0.153295	0.0134406	0.455	0.874	0.473809	0.86336	0.00331306	MIC not significant	TRUE	FALSE	FALSE	FALSE	TRUE	FALSE	FALSE	FALSE
pcodonTGGCTT	3682	0.0898223	0.00650848	0.023	0.386	0.0214032	0.375424	681	0.182589	0.0293863	0.005	0.281	0.00077322	0.315496	6.84008e-06	non-significant monotone/non-monotone	FALSE	TRUE	FALSE	FALSE	FALSE	TRUE	FALSE	FALSE
pcodonTGGCTC	3682	0.071844	0.000967401	0.932	0.96	0.92901	0.953082	220	0.235335	0.0161229	0.058	0.152	0.057861	0.153887	0.0600747	MIC not significant	FALSE	FALSE	FALSE	FALSE	FALSE	FALSE	FALSE	FALSE
pcodonTGGCTA	3682	0.0869919	0.00683918	0.009	0.274	0.0077142	0.291324	300	0.163166	0.0127834	0.961	0.992	0.942996	0.98407	0.0504152	MIC not significant	TRUE	FALSE	FALSE	FALSE	TRUE	FALSE	FALSE	FALSE
pcodonTGGCTG	3682	0.0842721	0.00583226	0.112	0.626	0.110866	0.621127	394	0.153621	0.0131363	0.973	0.997	0.952015	0.992531	0.0228885	MIC not significant	FALSE	FALSE	FALSE	FALSE	FALSE	FALSE	FALSE	FALSE
pcodonTGGCCT	3682	0.0825207	0.000362458	0.385	0.387	0.406714	0.414924	582	0.199691	0.0660071	0.000346535	0.956406	1.29591e-05	0.942424	3.16156e-10	MIC not significant	FALSE	TRUE	FALSE	FALSE	FALSE	TRUE	FALSE	FALSE
pcodonTGGCCC	3682	0.0743328	0.00305333	0.757	0.932	0.754175	0.934769	194	0.238378	0.0340041	0.104	0.437	0.105475	0.480068	0.0100549	MIC not significant	FALSE	FALSE	FALSE	FALSE	FALSE	FALSE	FALSE	FALSE
pcodonTGGCCA	3682	0.0776372	0.00496789	0.299	0.835	0.299995	0.835336	164	0.250272	0.0195146	0.101	0.223	0.0963605	0.221289	0.0744172	MIC not significant	FALSE	FALSE	FALSE	FALSE	FALSE	FALSE	FALSE	FALSE
pcodonTGGCCG	3682	0.0781453	0.00377594	0.728	0.947	0.731937	0.944533	466	0.187888	0.00712204	0.034	0.06	0.0277004	0.0578511	0.0687389	MIC not significant	FALSE	FALSE	FALSE	FALSE	FALSE	FALSE	FALSE	FALSE
pcodonTGGCAT	3682	0.0832014	0.010706	0.006	0.967	0.00101442	0.952105	59	0.235469	0.0492991	0.677	0.913	0.712386	0.891802	0.0910338	MIC not significant	TRUE	FALSE	FALSE	FALSE	TRUE	FALSE	FALSE	FALSE
pcodonTGGCAC	3682	0.0783018	0.0025649	0.197	0.55	0.193871	0.573083	60	0.236662	0.0130794	0.651	0.619	0.670511	0.646585	0.383272	MIC not significant	FALSE	FALSE	FALSE	FALSE	FALSE	FALSE	FALSE	FALSE
pcodonTGGCAA	3682	0.0762123	0.00362067	0.546	1	0.599455	0.988863	42	0.462534	0.0216298	0.006	0.004	0.000866703	0.000472382	0.351418	MIC not significant	FALSE	TRUE	FALSE	FALSE	FALSE	TRUE	FALSE	FALSE
pcodonTGGCAG	3682	0.0768552	0.00114874	0.379	0.482	0.39758	0.505277	164	0.25932	0.00438455	0.056	0.055	0.0527008	0.0435523	0.399555	MIC not significant	FALSE	FALSE	FALSE	FALSE	FALSE	FALSE	FALSE	FALSE
pcodonTGGCGT	3682	0.0759732	0.00298497	0.779	0.955	0.787331	0.943044	318	0.22652	0.0459587	0.008	0.404	0.00217784	0.444087	0.000116788	MIC not significant	FALSE	TRUE	FALSE	FALSE	FALSE	TRUE	FALSE	FALSE
pcodonTGGCGC	3682	0.0793188	0.00249526	0.142	0.338	0.137644	0.347699	146	0.223352	0.0172674	0.381	0.535	0.437935	0.587947	0.11388	MIC not significant	FALSE	FALSE	FALSE	FALSE	FALSE	FALSE	FALSE	FALSE
pcodonTGGCGA	3682	0.0795871	0.00515941	0.293	0.794	0.287815	0.809284	244	0.226619	0.0415535	0.086	0.67	0.072123	0.685189	0.00136705	MIC not significant	FALSE	FALSE	FALSE	FALSE	FALSE	FALSE	FALSE	FALSE
pcodonTGGCGG	3682	0.081391	0.00784501	0.311	0.938	0.304816	0.940406	370	0.195897	0.0153364	0.107	0.345	0.104969	0.357881	0.0171614	MIC not significant	FALSE	FALSE	FALSE	FALSE	FALSE	FALSE	FALSE	FALSE
pcodonTGGATT	3682	0.0939176	0.00323954	0.01	0.044	0.00416456	0.0322245	1099	0.164961	0.0371024	2.06186e-05	0.367052	2.16518e-07	0.387959	1.20506e-10	non-significant monotone/non-monotone	TRUE	TRUE	FALSE	FALSE	TRUE	TRUE	FALSE	FALSE
pcodonTGGATC	3682	0.0843343	0.00103411	0.231	0.292	0.231268	0.297941	596	0.20397	0.0799676	0.00025	0.999333	7.14115e-06	0.996477	2.01799e-12	MIC not significant	FALSE	TRUE	FALSE	FALSE	FALSE	TRUE	FALSE	FALSE
pcodonTGGATA	3682	0.0894637	0.00335689	0.01	0.078	0.00924528	0.0656664	503	0.189319	0.0514623	0.012	0.955	0.0068795	0.948528	2.71373e-07	Monotone	TRUE	TRUE	FALSE	FALSE	TRUE	TRUE	FALSE	FALSE
pcodonTGGATG	3682	0.0894356	0.0127142	0.081	0.98	0.0725649	0.970905	1018	0.14117	0.0231443	0.05	0.883	0.0422444	0.877047	1.08035e-06	MIC not significant	FALSE	FALSE	FALSE	FALSE	FALSE	FALSE	FALSE	FALSE
pcodonTGGACT	3682	0.0838373	0.00288119	0.213	0.452	0.210346	0.465033	501	0.199633	0.0363657	0.002	0.327	0.000763371	0.34632	1.72945e-05	MIC not significant	FALSE	TRUE	FALSE	FALSE	FALSE	TRUE	FALSE	FALSE
pcodonTGGACC	3682	0.083532	0.00148927	0.177	0.285	0.194875	0.30007	452	0.234776	0.0583948	5.94059e-05	0.170802	1.27361e-07	0.17584	1.98649e-07	MIC not significant	FALSE	TRUE	FALSE	FALSE	FALSE	TRUE	FALSE	FALSE
pcodonTGGACA	3682	0.0813786	0.00337352	0.099	0.322	0.0948944	0.342785	214	0.219778	0.0272548	0.264	0.649	0.263748	0.657626	0.0156263	MIC not significant	FALSE	FALSE	FALSE	FALSE	FALSE	FALSE	FALSE	FALSE
pcodonTGGACG	3682	0.0871713	0.00157696	0.073	0.142	0.0725926	0.135987	644	0.18446	0.0658798	0.00364356	0.999733	0.000874548	0.998212	3.7917e-11	MIC not significant	FALSE	TRUE	FALSE	FALSE	FALSE	TRUE	FALSE	FALSE
pcodonTGGAAT	3682	0.0826687	0.0068078	0.116	0.772	0.11439	0.767292	308	0.182282	0.0351575	0.55	0.994	0.594442	0.981489	0.000944135	MIC not significant	FALSE	FALSE	FALSE	FALSE	FALSE	FALSE	FALSE	FALSE
pcodonTGGAAC	3682	0.0759719	0.00250897	0.766	0.916	0.758279	0.908545	288	0.193848	0.0263029	0.293	0.797	0.311525	0.793846	0.00580436	MIC not significant	FALSE	FALSE	FALSE	FALSE	FALSE	FALSE	FALSE	FALSE
pcodonTGGAAA	3682	0.0843187	0.00467299	0.021	0.193	0.017194	0.185514	198	0.207612	0.00371262	0.425	0.418	0.442947	0.418488	0.393802	MIC not significant	FALSE	FALSE	FALSE	FALSE	FALSE	FALSE	FALSE	FALSE
pcodonTGGAAG	3682	0.0844623	0.00060307	0.249	0.264	0.243355	0.271774	642	0.20021	0.0574304	4.9505e-05	0.744386	2.10869e-06	0.75327	7.74356e-10	MIC not significant	FALSE	TRUE	FALSE	FALSE	FALSE	TRUE	FALSE	FALSE
pcodonTGGAGT	3682	0.0825051	0.00526011	0.186	0.66	0.183967	0.690897	342	0.212177	0.030597	0.031	0.346	0.0212774	0.380119	0.0011619	MIC not significant	FALSE	FALSE	FALSE	FALSE	FALSE	FALSE	FALSE	FALSE
pcodonTGGAGC	3682	0.0788814	0.00029286	0.602	0.601	0.625221	0.626379	413	0.217194	0.0308913	0.003	0.104	0.000517203	0.0983246	0.000331947	MIC not significant	FALSE	TRUE	FALSE	FALSE	FALSE	TRUE	FALSE	FALSE
pcodonTGGAGA	3682	0.0857198	0.00708038	0.033	0.488	0.0230768	0.507416	322	0.177109	0.0154196	0.506	0.81	0.54713	0.808106	0.0258659	MIC not significant	FALSE	FALSE	FALSE	FALSE	FALSE	FALSE	FALSE	FALSE
pcodonTGGAGG	3682	0.079448	0.000422078	0.794	0.797	0.786138	0.798221	669	0.201986	0.0558763	1.04167e-05	0.414833	2.47611e-08	0.439931	5.99643e-10	MIC not significant	FALSE	TRUE	FALSE	FALSE	FALSE	TRUE	FALSE	FALSE
pcodonTGGGTC	3682	0.0782522	0.00274772	0.509	0.792	0.539907	0.793154	310	0.197985	0.0158018	0.186	0.476	0.209492	0.494523	0.0268897	MIC not significant	FALSE	FALSE	FALSE	FALSE	FALSE	FALSE	FALSE	FALSE
pcodonTGGGTG	3682	0.0899904	0.00950968	0.007	0.484	0.00488309	0.490427	467	0.188213	0.0310063	0.021	0.56	0.0172019	0.574999	0.000130783	non-significant monotone/non-monotone	TRUE	FALSE	FALSE	FALSE	TRUE	TRUE	FALSE	FALSE
pcodonTGGGCT	3682	0.0889394	0.0122451	0.019	0.85	0.00935301	0.844515	466	0.176887	0.0201345	0.13	0.594	0.128114	0.606431	0.00213746	MIC not significant	FALSE	FALSE	FALSE	FALSE	TRUE	FALSE	FALSE	FALSE
pcodonTGGGCC	3682	0.0789019	0.00056222	0.642	0.672	0.638539	0.670174	407	0.206096	0.0432682	0.026	0.668	0.0125109	0.699297	2.33802e-05	MIC not significant	FALSE	FALSE	FALSE	FALSE	FALSE	TRUE	FALSE	FALSE
pcodonTGGGCA	3682	0.0804737	0.00751858	0.119	0.842	0.1209	0.844474	201	0.270936	0.0394419	0.019	0.166	0.00648465	0.184279	0.00470909	MIC not significant	FALSE	FALSE	FALSE	FALSE	FALSE	TRUE	FALSE	FALSE
pcodonTGGGCG	3682	0.0842338	0.000456611	0.275653	0.292267	0.283239	0.300689	652	0.18184	0.0480373	0.003	0.925	0.00107017	0.917626	1.56203e-08	MIC not significant	FALSE	TRUE	FALSE	FALSE	FALSE	TRUE	FALSE	FALSE
pcodonTGGGAC	3682	0.0836973	0.00640189	0.008	0.302	0.00798012	0.301806	156	0.241882	0.0379907	0.266	0.726	0.302272	0.736306	0.0147564	MIC not significant	TRUE	FALSE	FALSE	FALSE	TRUE	FALSE	FALSE	FALSE
pcodonTGGGAA	3682	0.0785535	0.00773649	0.414	0.977	0.430395	0.977681	274	0.181709	0.0244938	0.708	0.977	0.732768	0.962605	0.009465	MIC not significant	FALSE	FALSE	FALSE	FALSE	FALSE	FALSE	FALSE	FALSE
pcodonTGGGAG	3682	0.0770215	0.00308194	0.536	0.808	0.545939	0.822975	234	0.254448	0.0172998	0.016	0.039	0.00656233	0.0348393	0.0444347	MIC not significant	FALSE	FALSE	FALSE	FALSE	FALSE	TRUE	FALSE	FALSE
pcodonTGGGGT	3682	0.0905221	0.0158181	0.021	0.989	0.0152043	0.981455	713	0.184213	0.0278161	0.001	0.087	1.37611e-05	0.0709849	7.57023e-06	non-significant monotone/non-monotone	FALSE	TRUE	FALSE	FALSE	FALSE	TRUE	FALSE	FALSE
pcodonTGGGGC	3682	0.0905173	0.00931038	0.018	0.518	0.00803496	0.524188	559	0.186216	0.0434831	0.008	0.895	0.00716819	0.878805	6.55971e-07	non-significant monotone/non-monotone	FALSE	TRUE	FALSE	FALSE	TRUE	TRUE	FALSE	FALSE
pcodonTGGGGA	3682	0.0932792	0.00809608	0.001	0.202	0.00131366	0.201684	706	0.162307	0.0350349	0.069	0.975	0.0550656	0.951348	5.47372e-07	MIC not significant	TRUE	FALSE	FALSE	FALSE	TRUE	FALSE	FALSE	FALSE
pcodonTGGGGG	3682	0.0905147	0.0191661	0.011	0.998	0.00681588	0.998014	599	0.170105	0.0131146	0.084	0.354	0.0827094	0.365732	0.00501341	MIC not significant	TRUE	FALSE	FALSE	FALSE	TRUE	FALSE	FALSE	FALSE
pcodonCTTTTT	3682	0.0835752	0.00669001	0.422	0.947	0.443144	0.947651	799	0.156175	0.0165815	0.029	0.421	0.0273982	0.427551	0.000262887	MIC not significant	FALSE	FALSE	FALSE	FALSE	FALSE	FALSE	FALSE	FALSE
pcodonCTTTTC	3682	0.0791203	0.00112859	0.709	0.787	0.718215	0.794772	529	0.174074	0.0247904	0.121	0.729	0.110798	0.732636	0.000277468	MIC not significant	FALSE	FALSE	FALSE	FALSE	FALSE	FALSE	FALSE	FALSE
pcodonCTTTTA	3682	0.083022	3.56934e-05	0.431	0.4	0.437965	0.410166	707	0.184836	0.0421255	0.00043299	0.501959	2.62298e-05	0.529001	3.662e-08	MIC not significant	FALSE	TRUE	FALSE	FALSE	FALSE	TRUE	FALSE	FALSE
pcodonCTTTTG	3682	0.101537	0.0232481	0	0.891825	1.48758e-07	0.888957	800	0.167082	0.0197405	0.004	0.156	0.00110254	0.153294	6.67588e-05	non-significant monotone/non-monotone	TRUE	TRUE	FALSE	FALSE	TRUE	TRUE	FALSE	FALSE
pcodonCTTTCT	3682	0.0800862	0.000651836	0.492	0.537	0.490677	0.533646	416	0.1599	0.0189083	0.775	0.986	0.773661	0.974738	0.00496135	MIC not significant	FALSE	FALSE	FALSE	FALSE	FALSE	FALSE	FALSE	FALSE
pcodonCTTTCC	3682	0.0785191	0.000950116	0.368	0.431	0.369396	0.442003	231	0.245194	0.0252199	0.045	0.2	0.0357027	0.208256	0.0156953	MIC not significant	FALSE	FALSE	FALSE	FALSE	FALSE	FALSE	FALSE	FALSE
pcodonCTTTCA	3682	0.079321	0.00281167	0.249	0.523	0.261379	0.538508	219	0.227816	0.0148381	0.106	0.205	0.112641	0.222169	0.0720126	MIC not significant	FALSE	FALSE	FALSE	FALSE	FALSE	FALSE	FALSE	FALSE
pcodonCTTTCG	3682	0.0811689	0.000592884	0.361	0.404	0.375586	0.411916	429	0.217238	0.0409013	0.002	0.159	7.21346e-05	0.163214	2.43935e-05	MIC not significant	FALSE	TRUE	FALSE	FALSE	FALSE	TRUE	FALSE	FALSE
pcodonCTTTAT	3682	0.0847715	0.000680787	0.17	0.203	0.184335	0.216965	583	0.187824	0.0530396	0.002	0.931	0.000971841	0.915665	1.85929e-08	MIC not significant	FALSE	TRUE	FALSE	FALSE	FALSE	TRUE	FALSE	FALSE
pcodonCTTTAC	3682	0.0831785	0.00609142	0.053	0.467	0.0448118	0.489956	223	0.273109	0.0361142	0.004	0.031	0.000209457	0.0193999	0.00440069	MIC not significant	FALSE	TRUE	FALSE	FALSE	FALSE	TRUE	FALSE	FALSE
pcodonCTTTAA	3682	0.0864205	0.00802746	0.011	0.452	0.0088451	0.450416	290	0.238137	0.0416684	0.015	0.374	0.00799089	0.393607	0.000468636	non-significant monotone/non-monotone	TRUE	FALSE	FALSE	FALSE	TRUE	TRUE	FALSE	FALSE
pcodonCTTTAG	3682	0.0850895	0.00294068	0.101	0.245	0.0841923	0.259172	408	0.211137	0.018784	0.011	0.077	0.0035536	0.0665304	0.00555462	MIC not significant	FALSE	TRUE	FALSE	FALSE	FALSE	TRUE	FALSE	FALSE
pcodonCTTTGT	3682	0.0932573	0.0262253	0.000392157	0.99999	0.000156479	0.999859	440	0.221549	0.0128319	0.000990099	0.00468317	6.91847e-05	0.00119779	0.0174525	Non-monotone	TRUE	TRUE	FALSE	FALSE	TRUE	TRUE	FALSE	FALSE
pcodonCTTTGC	3682	0.0803146	6.63829e-06	0.393	0.359	0.411819	0.38117	358	0.22416	0.0519458	0.005	0.696	0.00361815	0.704084	1.33222e-05	MIC not significant	FALSE	TRUE	FALSE	FALSE	FALSE	TRUE	FALSE	FALSE
pcodonCTTTGA	3682	0.0905188	0.00438512	0.004	0.061	0.00353013	0.0586594	490	0.184948	0.0388042	0.057	0.891	0.0387311	0.874664	1.12061e-05	MIC not significant	TRUE	FALSE	FALSE	FALSE	TRUE	FALSE	FALSE	FALSE
pcodonCTTTGG	3682	0.0854801	0.00207604	0.175	0.307	0.166359	0.318475	642	0.170427	0.0207925	0.05	0.505	0.0406304	0.527769	0.000246705	MIC not significant	FALSE	FALSE	FALSE	FALSE	FALSE	FALSE	FALSE	FALSE
pcodonCTTCTT	3682	0.0868518	2.49264e-05	0.097	0.082	0.101187	0.0891767	727	0.173802	0.0611745	0.00746114	0.999995	0.0027881	0.999639	1.35404e-11	MIC not significant	FALSE	TRUE	FALSE	FALSE	FALSE	TRUE	FALSE	FALSE
pcodonCTTCTC	3682	0.0796348	7.68715e-05	0.131	0.122	0.132548	0.119081	158	0.262571	0.0170065	0.1	0.161	0.0956748	0.179031	0.102431	MIC not significant	FALSE	FALSE	FALSE	FALSE	FALSE	FALSE	FALSE	FALSE
pcodonCTTCTA	3682	0.0817553	0.00103894	0.334	0.401	0.330195	0.41114	436	0.198446	0.0403485	0.053	0.792	0.0397636	0.805725	2.38542e-05	MIC not significant	FALSE	FALSE	FALSE	FALSE	FALSE	FALSE	FALSE	FALSE
pcodonCTTCTG	3682	0.0767604	7.92919e-05	0.637	0.619	0.654812	0.638275	289	0.2415	0.0498225	0.001	0.243	0.000523272	0.262093	0.000129976	MIC not significant	FALSE	TRUE	FALSE	FALSE	FALSE	TRUE	FALSE	FALSE
pcodonCTTCCT	3682	0.082324	0.00112655	0.254	0.337	0.264877	0.348764	408	0.190867	0.0456202	0.107	0.975	0.0941778	0.960707	1.35295e-05	MIC not significant	FALSE	FALSE	FALSE	FALSE	FALSE	FALSE	FALSE	FALSE
pcodonCTTCCC	3682	0.0888093	7.48883e-06	8.16327e-05	8.16327e-05	7.04488e-06	4.24429e-06	123	0.216619	0.0170396	0.583	0.723	0.621563	0.73379	0.150124	MIC not significant	TRUE	FALSE	FALSE	FALSE	TRUE	FALSE	FALSE	FALSE
pcodonCTTCCA	3682	0.0787978	0.00324095	0.189	0.51	0.185121	0.520989	148	0.244612	0.0204042	0.376	0.574	0.417718	0.596266	0.0832872	MIC not significant	FALSE	FALSE	FALSE	FALSE	FALSE	FALSE	FALSE	FALSE
pcodonCTTCCG	3682	0.0770368	2.5375e-05	0.636	0.608	0.649202	0.623547	291	0.258704	0.0513749	0.001	0.187	0.000193873	0.193018	9.58836e-05	MIC not significant	FALSE	TRUE	FALSE	FALSE	FALSE	TRUE	FALSE	FALSE
pcodonCTTCAT	3682	0.0811909	0.00181876	0.033	0.1	0.029383	0.0873468	98	0.286585	0.176432	0.100327	0.999941	0.0928829	0.999681	1.66437e-05	MIC not significant	FALSE	FALSE	FALSE	FALSE	FALSE	FALSE	FALSE	FALSE
pcodonCTTCAC	3682	0.0758668	0.000608673	0.565	0.633	0.5934	0.647075	61	0.280383	0.0227785	0.242	0.276	0.257925	0.301825	0.244939	MIC not significant	FALSE	FALSE	FALSE	FALSE	FALSE	FALSE	FALSE	FALSE
pcodonCTTCAA	3682	0.0766272	0.00203385	0.449	0.8	0.488465	0.806427	51	0.337843	0.0309187	0.195	0.222	0.200245	0.246022	0.216443	MIC not significant	FALSE	FALSE	FALSE	FALSE	FALSE	FALSE	FALSE	FALSE
pcodonCTTCAG	3682	0.0809163	0.000220955	0.072	0.072	0.0716366	0.0682779	155	0.232716	0.00707156	0.42	0.422	0.453737	0.46142	0.298194	MIC not significant	FALSE	FALSE	FALSE	FALSE	FALSE	FALSE	FALSE	FALSE
pcodonCTTCGT	3682	0.0833118	0.0045956	0.143	0.548	0.139723	0.562411	376	0.19928	0.0252949	0.07	0.463	0.060136	0.486819	0.00197867	MIC not significant	FALSE	FALSE	FALSE	FALSE	FALSE	FALSE	FALSE	FALSE
pcodonCTTCGC	3682	0.0854973	0.00388202	0.000891089	0.019396	0.000236419	0.01315	98	0.266911	0.0264115	0.183	0.316	0.206118	0.35224	0.109858	MIC not significant	TRUE	FALSE	FALSE	FALSE	TRUE	FALSE	FALSE	FALSE
pcodonCTTCGA	3682	0.0831978	0.00478012	0.132	0.535	0.131143	0.561896	332	0.22555	0.0377498	0.014	0.343	0.00525072	0.35969	0.000369685	MIC not significant	FALSE	TRUE	FALSE	FALSE	FALSE	TRUE	FALSE	FALSE
pcodonCTTCGG	3682	0.0862296	0.0101252	0.004	0.622	0.00660849	0.647818	245	0.204272	0.0165949	0.345	0.604	0.384325	0.627938	0.0439616	MIC not significant	TRUE	FALSE	FALSE	FALSE	TRUE	FALSE	FALSE	FALSE
pcodonCTTATT	3682	0.08552	0.00162373	0.333	0.465	0.334013	0.478548	1061	0.168395	0.0477592	0	0.76418	4.22439e-08	0.769887	6.14415e-13	MIC not significant	FALSE	TRUE	FALSE	FALSE	FALSE	TRUE	FALSE	FALSE
pcodonCTTATC	3682	0.0741786	6.16934e-05	0.951	0.94	0.946294	0.939007	410	0.204961	0.053987	0.017	0.908	0.00868564	0.901885	1.97835e-06	MIC not significant	FALSE	FALSE	FALSE	FALSE	FALSE	TRUE	FALSE	FALSE
pcodonCTTATA	3682	0.0853167	0.0084706	0.103	0.838	0.104744	0.838162	505	0.181364	0.0380943	0.04	0.859	0.0292773	0.857229	9.97303e-06	MIC not significant	FALSE	FALSE	FALSE	FALSE	FALSE	FALSE	FALSE	FALSE
pcodonCTTATG	3682	0.0893867	0.00442915	0.041	0.251	0.035342	0.250041	806	0.17838	0.033758	0.000178218	0.208099	5.84613e-06	0.216774	1.49717e-07	non-significant monotone/non-monotone	FALSE	TRUE	FALSE	FALSE	FALSE	TRUE	FALSE	FALSE
pcodonCTTACT	3682	0.0717265	0.00107343	0.986	0.994	0.982863	0.990708	322	0.211685	0.0236865	0.034	0.211	0.0193182	0.225117	0.00564919	MIC not significant	FALSE	FALSE	FALSE	FALSE	FALSE	FALSE	FALSE	FALSE
pcodonCTTACC	3682	0.0780776	0.00281835	0.412	0.708	0.446916	0.724213	251	0.239187	0.0350253	0.021	0.222	0.0113192	0.241353	0.00291497	MIC not significant	FALSE	FALSE	FALSE	FALSE	FALSE	TRUE	FALSE	FALSE
pcodonCTTACA	3682	0.0763901	0.000196146	0.401	0.392	0.419886	0.408833	127	0.273663	0.0405048	0.163	0.486	0.167218	0.530948	0.023274	MIC not significant	FALSE	FALSE	FALSE	FALSE	FALSE	FALSE	FALSE	FALSE
pcodonCTTACG	3682	0.0938627	0.00766903	0.000207921	0.0425842	6.05566e-05	0.0378718	426	0.244738	0.0891123	1e-05	0.73568	4.80221e-09	0.745345	3.23383e-10	non-significant monotone/non-monotone	TRUE	TRUE	FALSE	FALSE	TRUE	TRUE	FALSE	FALSE
pcodonCTTAAT	3682	0.0806972	0.00569037	0.213	0.759	0.208887	0.774876	252	0.219372	0.0424309	0.104	0.73	0.0930991	0.742382	0.00100531	MIC not significant	FALSE	FALSE	FALSE	FALSE	FALSE	FALSE	FALSE	FALSE
pcodonCTTAAC	3682	0.0718575	3.89394e-06	0.954	0.944	0.954196	0.946032	238	0.26128	0.0757222	0.004	0.747	0.00198097	0.754319	1.6601e-05	MIC not significant	FALSE	TRUE	FALSE	FALSE	FALSE	TRUE	FALSE	FALSE
pcodonCTTAAA	3682	0.0772604	0.00118335	0.286	0.401	0.307472	0.416403	135	0.252636	0.0330068	0.229	0.562	0.256312	0.585838	0.0349567	MIC not significant	FALSE	FALSE	FALSE	FALSE	FALSE	FALSE	FALSE	FALSE
pcodonCTTAAG	3682	0.0791167	0.00179417	0.692	0.832	0.692479	0.825424	498	0.206564	0.0739657	0.000920792	0.991356	9.06159e-05	0.981602	6.80254e-10	MIC not significant	FALSE	TRUE	FALSE	FALSE	FALSE	TRUE	FALSE	FALSE
pcodonCTTAGT	3682	0.0800814	0.00772331	0.308	0.951	0.314598	0.955319	285	0.188263	0.0292895	0.417	0.917	0.445838	0.90257	0.0037565	MIC not significant	FALSE	FALSE	FALSE	FALSE	FALSE	FALSE	FALSE	FALSE
pcodonCTTAGC	3682	0.0779246	0.00305469	0.471	0.785	0.491785	0.783995	254	0.193861	0.0300341	0.433	0.921	0.469469	0.898104	0.00561654	MIC not significant	FALSE	FALSE	FALSE	FALSE	FALSE	FALSE	FALSE	FALSE
pcodonCTTAGA	3682	0.0809433	0.00242271	0.218	0.428	0.225452	0.443733	282	0.213234	0.0182416	0.093	0.271	0.0772994	0.274217	0.0233051	MIC not significant	FALSE	FALSE	FALSE	FALSE	FALSE	FALSE	FALSE	FALSE
pcodonCTTAGG	3682	0.0843719	1.15644e-05	0.148	0.13	0.143698	0.127119	448	0.205506	0.0586434	0.01	0.925	0.00194069	0.91221	2.11706e-07	MIC not significant	FALSE	TRUE	FALSE	FALSE	FALSE	TRUE	FALSE	FALSE
pcodonCTTGTC	3682	0.0760149	2.62292e-05	0.754	0.733	0.765746	0.743187	306	0.245999	0.0420094	0.001	0.109	0.000190989	0.101096	0.000307279	MIC not significant	FALSE	TRUE	FALSE	FALSE	FALSE	TRUE	FALSE	FALSE
pcodonCTTGTG	3682	0.0786462	0.00515092	0.671	0.967	0.677047	0.964973	431	0.174226	0.0188747	0.426	0.877	0.455689	0.866997	0.00427032	MIC not significant	FALSE	FALSE	FALSE	FALSE	FALSE	FALSE	FALSE	FALSE
pcodonCTTGCT	3682	0.0930944	0.00442709	0.000213592	0.00450485	3.67184e-05	0.00264184	343	0.204644	0.0134788	0.065	0.184	0.0593395	0.182996	0.031587	MIC not significant	TRUE	FALSE	FALSE	FALSE	TRUE	FALSE	FALSE	FALSE
pcodonCTTGCC	3682	0.0748539	0.000237968	0.748	0.749	0.736336	0.732611	221	0.249293	0.0101686	0.022	0.029	0.0108753	0.0187427	0.135072	MIC not significant	FALSE	FALSE	FALSE	FALSE	FALSE	TRUE	FALSE	FALSE
pcodonCTTGCA	3682	0.0748892	0.000672189	0.682	0.718	0.68003	0.72347	186	0.235259	0.0207407	0.183	0.358	0.181638	0.389618	0.0498657	MIC not significant	FALSE	FALSE	FALSE	FALSE	FALSE	FALSE	FALSE	FALSE
pcodonCTTGCG	3682	0.0810365	7.93079e-06	0.349	0.318	0.359848	0.327921	405	0.205162	0.0119868	0.028	0.07	0.0172248	0.0714052	0.0275843	MIC not significant	FALSE	FALSE	FALSE	FALSE	FALSE	TRUE	FALSE	FALSE
pcodonCTTGAC	3682	0.0756862	0.00422961	0.509	0.96	0.525337	0.950372	79	0.290306	0.0734404	0.127	0.638	0.129457	0.661251	0.0157055	MIC not significant	FALSE	FALSE	FALSE	FALSE	FALSE	FALSE	FALSE	FALSE
pcodonCTTGAA	3682	0.0805409	0.000755566	0.273	0.305	0.268932	0.315838	280	0.215376	0.0364502	0.089	0.647	0.0808217	0.651972	0.00132745	MIC not significant	FALSE	FALSE	FALSE	FALSE	FALSE	FALSE	FALSE	FALSE
pcodonCTTGAG	3682	0.0799727	0.00155479	0.121	0.198	0.116235	0.209523	163	0.252995	0.0830595	0.087	0.971	0.0933334	0.951233	0.000190984	MIC not significant	FALSE	FALSE	FALSE	FALSE	FALSE	FALSE	FALSE	FALSE
pcodonCTTGGT	3682	0.0908938	0.00389729	0.011	0.074	0.00679711	0.0674393	596	0.175492	0.0537355	0.043	0.999	0.0320597	0.998077	1.03146e-08	Monotone	TRUE	FALSE	FALSE	FALSE	TRUE	FALSE	FALSE	FALSE
pcodonCTTGGC	3682	0.0768406	5.86624e-05	0.769	0.754	0.767549	0.745842	359	0.171965	0.0127216	0.734	0.912	0.736969	0.899947	0.032644	MIC not significant	FALSE	FALSE	FALSE	FALSE	FALSE	FALSE	FALSE	FALSE
pcodonCTTGGA	3682	0.0820985	1.8785e-05	0.452	0.42	0.471287	0.442433	638	0.202205	0.0791609	6.93069e-05	0.998871	1.39838e-06	0.994878	4.50434e-13	MIC not significant	FALSE	TRUE	FALSE	FALSE	FALSE	TRUE	FALSE	FALSE
pcodonCTTGGG	3682	0.089583	0.0039822	0.012	0.099	0.00943474	0.0980287	540	0.189742	0.0368726	0.003	0.497	0.00194874	0.519139	6.99834e-06	non-significant monotone/non-monotone	TRUE	TRUE	FALSE	FALSE	TRUE	TRUE	FALSE	FALSE
pcodonCTCTTT	3682	0.0829514	0.00509972	0.079	0.46	0.0739279	0.470771	260	0.254763	0.0556156	0.005	0.427	0.00290823	0.465316	0.000123738	MIC not significant	FALSE	TRUE	FALSE	FALSE	FALSE	TRUE	FALSE	FALSE
pcodonCTCTTC	3682	0.0729289	0.000807729	0.825	0.873	0.833039	0.87087	170	0.236891	0.0990479	0.156743	0.999673	0.161055	0.997339	2.91674e-05	MIC not significant	FALSE	FALSE	FALSE	FALSE	FALSE	FALSE	FALSE	FALSE
pcodonCTCTTA	3682	0.0770245	0.000436645	0.584	0.597	0.579296	0.599466	251	0.273428	0.0977067	0.000554455	0.767693	2.21979e-05	0.773764	4.31025e-07	MIC not significant	FALSE	TRUE	FALSE	FALSE	FALSE	TRUE	FALSE	FALSE
pcodonCTCTTG	3682	0.0870425	0.00895677	0.007	0.418	0.0046741	0.43381	251	0.228222	0.0108302	0.048	0.084	0.0339674	0.0695139	0.0999721	non-significant monotone/non-monotone	TRUE	FALSE	FALSE	FALSE	TRUE	FALSE	FALSE	FALSE
pcodonCTCTCT	3682	0.0775538	0.00135831	0.264	0.391	0.279491	0.406791	115	0.24718	0.0249259	0.353	0.537	0.3673	0.571135	0.0919581	MIC not significant	FALSE	FALSE	FALSE	FALSE	FALSE	FALSE	FALSE	FALSE
pcodonCTCTCC	3682	0.0789238	0.000716578	0.109	0.151	0.110643	0.148031	77	0.264524	0.0168257	0.321	0.365	0.358424	0.39725	0.260853	MIC not significant	FALSE	FALSE	FALSE	FALSE	FALSE	FALSE	FALSE	FALSE
pcodonCTCTCA	3682	0.077211	0.00274272	0.336	0.897	0.356843	0.880942	42	0.454609	0.00435165	0.007	0.003	0.00124197	0.000390154	0.678094	MIC not significant	FALSE	TRUE	FALSE	FALSE	FALSE	TRUE	FALSE	FALSE
pcodonCTCTCG	3682	0.0759211	7.0091e-05	0.459	0.427	0.475522	0.448137	122	0.345144	0.12103	0.00137624	0.388941	5.34708e-05	0.424242	8.62155e-05	MIC not significant	FALSE	TRUE	FALSE	FALSE	FALSE	TRUE	FALSE	FALSE
pcodonCTCTAT	3682	0.0779233	1.75882e-05	0.247	0.221	0.260443	0.235421	154	0.288992	0.0828387	0.036	0.731	0.0191542	0.743863	0.000295156	MIC not significant	FALSE	FALSE	FALSE	FALSE	FALSE	FALSE	FALSE	FALSE
pcodonCTCTAC	3682	0.0782874	0.00232552	0.184	0.457	0.18479	0.48805	67	0.344873	0.100014	0.094	0.65	0.0836666	0.668198	0.00912905	MIC not significant	FALSE	FALSE	FALSE	FALSE	FALSE	FALSE	FALSE	FALSE
pcodonCTCTAA	3682	0.0749588	0.00371573	0.687	0.985	0.698315	0.977079	66	0.545216	0.158853	8.24742e-05	0.0153505	1.4153e-08	0.00563772	0.000917836	MIC not significant	FALSE	TRUE	FALSE	FALSE	FALSE	TRUE	FALSE	FALSE
pcodonCTCTAG	3682	0.081003	0.00749742	0.041	0.754	0.0347258	0.758773	101	0.260872	0.0455208	0.203	0.58	0.221077	0.611492	0.032174	MIC not significant	FALSE	FALSE	FALSE	FALSE	FALSE	FALSE	FALSE	FALSE
pcodonCTCTGT	3682	0.0813448	0.00556339	0.037	0.451	0.0337681	0.476772	125	0.260169	0.0178002	0.311	0.448	0.356863	0.476707	0.137993	MIC not significant	FALSE	FALSE	FALSE	FALSE	FALSE	FALSE	FALSE	FALSE
pcodonCTCTGC	3682	0.079359	8.68516e-08	0.131	0.111	0.126495	0.108568	133	0.274002	0.0720362	0.096	0.798	0.0846475	0.798939	0.00178659	MIC not significant	FALSE	FALSE	FALSE	FALSE	FALSE	FALSE	FALSE	FALSE
pcodonCTCTGA	3682	0.0722988	0.000136347	0.868	0.857	0.865009	0.856291	125	0.307292	0.0409129	0.047	0.188	0.0274532	0.191057	0.0236876	MIC not significant	FALSE	FALSE	FALSE	FALSE	FALSE	FALSE	FALSE	FALSE
pcodonCTCTGG	3682	0.0787665	0.000131389	0.309	0.301	0.327476	0.313868	222	0.26864	0.0631442	0.005	0.288	0.000510045	0.325004	0.000154438	MIC not significant	FALSE	TRUE	FALSE	FALSE	FALSE	TRUE	FALSE	FALSE
pcodonCTCCTT	3682	0.0744169	0.00212749	0.718	0.88	0.725227	0.877767	180	0.203895	0.0219783	0.736	0.924	0.734984	0.90549	0.0470196	MIC not significant	FALSE	FALSE	FALSE	FALSE	FALSE	FALSE	FALSE	FALSE
pcodonCTCCTC	3682	0.0732307	0.000295693	0.815	0.818	0.813655	0.819084	102	0.391723	0.19151	0.002	0.943	8.45788e-05	0.929227	4.23706e-06	MIC not significant	FALSE	TRUE	FALSE	FALSE	FALSE	TRUE	FALSE	FALSE
pcodonCTCCTA	3682	0.0796488	2.31895e-05	0.075	0.064	0.0767771	0.0636986	89	0.320122	0.0488641	0.069	0.236	0.0563495	0.259027	0.0373653	MIC not significant	FALSE	FALSE	FALSE	FALSE	FALSE	FALSE	FALSE	FALSE
pcodonCTCCTG	3682	0.0783468	0.000370797	0.202	0.21	0.198151	0.206068	136	0.331781	0.0927733	0.002	0.3	0.000451423	0.3143	0.000311752	MIC not significant	FALSE	TRUE	FALSE	FALSE	FALSE	TRUE	FALSE	FALSE
pcodonCTCCCT	3682	0.0743982	4.26782e-05	0.672	0.642	0.674949	0.647998	111	0.304523	0.0901525	0.054	0.75	0.0399937	0.75765	0.00136583	MIC not significant	FALSE	FALSE	FALSE	FALSE	FALSE	FALSE	FALSE	FALSE
pcodonCTCCCC	3682	0.0775603	0.000177212	0.274	0.246	0.290909	0.272897	42	0.298658	0.000273272	0.262	0.158	0.312284	0.163191	0.917243	MIC not significant	FALSE	FALSE	FALSE	FALSE	FALSE	FALSE	FALSE	FALSE
pcodonCTCCCG	3682	0.0761543	0.000169532	0.398	0.379	0.428202	0.412285	91	0.297632	0.0149379	0.107	0.116	0.102279	0.113602	0.248448	MIC not significant	FALSE	FALSE	FALSE	FALSE	FALSE	FALSE	FALSE	FALSE
pcodonCTCCAG	3682	0.0769462	0.000582408	0.391	0.45	0.417319	0.474752	52	0.190393	0.0141241	0.998	0.99	0.971382	0.963262	0.401386	MIC not significant	FALSE	FALSE	FALSE	FALSE	FALSE	FALSE	FALSE	FALSE
pcodonCTCCGT	3682	0.0824507	0.00309985	0.011	0.078	0.00444653	0.0750267	65	0.230995	0.00437874	0.909	0.847	0.892103	0.843006	0.600474	MIC not significant	TRUE	FALSE	FALSE	FALSE	TRUE	FALSE	FALSE	FALSE
pcodonCTCCGA	3682	0.0780517	0.000227986	0.227	0.227	0.236141	0.230801	54	0.453627	0.255731	0.009	0.904	0.000650533	0.887166	0.000119001	MIC not significant	FALSE	TRUE	FALSE	FALSE	FALSE	TRUE	FALSE	FALSE
pcodonCTCCGG	3682	0.0790426	0.00252435	0.118	0.362	0.104503	0.39524	64	0.369763	0.0255288	0.076	0.091	0.0567839	0.073268	0.207256	MIC not significant	FALSE	FALSE	FALSE	FALSE	FALSE	FALSE	FALSE	FALSE
pcodonCTCATT	3682	0.0853613	0.000914211	0.018	0.025	0.0163231	0.0255988	262	0.199381	0.0356174	0.445	0.962	0.489245	0.950607	0.00215639	MIC not significant	FALSE	FALSE	FALSE	FALSE	FALSE	FALSE	FALSE	FALSE
pcodonCTCATC	3682	0.0730589	0.000318598	0.807	0.809	0.815835	0.818972	140	0.224384	0.00459286	0.507	0.452	0.525936	0.48987	0.426265	MIC not significant	FALSE	FALSE	FALSE	FALSE	FALSE	FALSE	FALSE	FALSE
pcodonCTCATA	3682	0.073335	0.00135385	0.772	0.874	0.778502	0.871116	109	0.30174	0.0197296	0.059	0.09	0.0540654	0.093823	0.145173	MIC not significant	FALSE	FALSE	FALSE	FALSE	FALSE	FALSE	FALSE	FALSE
pcodonCTCATG	3682	0.0782587	0.000905526	0.381	0.468	0.405385	0.477062	240	0.212163	0.0142262	0.304	0.481	0.307911	0.503626	0.0650776	MIC not significant	FALSE	FALSE	FALSE	FALSE	FALSE	FALSE	FALSE	FALSE
pcodonCTCACT	3682	0.0799457	1.37521e-05	0.072	0.056	0.0648765	0.0526163	80	0.237746	0.0172112	0.524	0.56	0.568358	0.609335	0.246062	MIC not significant	FALSE	FALSE	FALSE	FALSE	FALSE	FALSE	FALSE	FALSE
pcodonCTCACC	3682	0.0777655	0.00187596	0.255	0.487	0.267635	0.513418	70	0.359739	0.133005	0.036	0.738	0.0178372	0.736927	0.00190917	MIC not significant	FALSE	FALSE	FALSE	FALSE	FALSE	TRUE	FALSE	FALSE
pcodonCTCACG	3682	0.0793074	0.00108241	0.106	0.164	0.103683	0.166146	105	0.344185	0.0194649	0.019	0.026	0.00658364	0.0129372	0.155765	MIC not significant	FALSE	FALSE	FALSE	FALSE	FALSE	TRUE	FALSE	FALSE
pcodonCTCAAT	3682	0.0813347	0.00280718	0.028	0.133	0.0131386	0.128106	62	0.254457	0.00236948	0.414	0.319	0.460251	0.346969	0.707134	MIC not significant	FALSE	FALSE	FALSE	FALSE	TRUE	FALSE	FALSE	FALSE
pcodonCTCAAC	3682	0.0770354	6.44974e-05	0.363	0.32	0.377474	0.340296	56	0.239649	0.0288416	0.702	0.8	0.727255	0.792702	0.210815	MIC not significant	FALSE	FALSE	FALSE	FALSE	FALSE	FALSE	FALSE	FALSE
pcodonCTCAAG	3682	0.0787969	0.00308465	0.238	0.551	0.243327	0.562664	184	0.246485	0.0892309	0.096	0.996	0.0955037	0.987208	3.80858e-05	MIC not significant	FALSE	FALSE	FALSE	FALSE	FALSE	FALSE	FALSE	FALSE
pcodonCTCAGT	3682	0.0779125	0.00251297	0.215	0.558	0.225294	0.582504	67	0.308464	0.00168635	0.258	0.178	0.281446	0.187902	0.741441	MIC not significant	FALSE	FALSE	FALSE	FALSE	FALSE	FALSE	FALSE	FALSE
pcodonCTCAGC	3682	0.0757008	0.000195384	0.504	0.487	0.528336	0.516554	82	0.251303	0.0367347	0.702	0.898	0.728115	0.894529	0.084533	MIC not significant	FALSE	FALSE	FALSE	FALSE	FALSE	FALSE	FALSE	FALSE
pcodonCTCAGA	3682	0.0768439	1.13167e-05	0.376	0.331	0.407273	0.363772	61	0.268577	0.0171659	0.329	0.328	0.361599	0.36421	0.314191	MIC not significant	FALSE	FALSE	FALSE	FALSE	FALSE	FALSE	FALSE	FALSE
pcodonCTCAGG	3682	0.0734995	6.05986e-06	0.798	0.761	0.801178	0.775327	175	0.265006	0.0376835	0.068	0.331	0.0568219	0.362909	0.0100492	MIC not significant	FALSE	FALSE	FALSE	FALSE	FALSE	FALSE	FALSE	FALSE
pcodonCTCGTC	3682	0.0764935	0.000328469	0.394	0.4	0.40904	0.418116	105	0.257604	0.0261704	0.416	0.656	0.478125	0.665629	0.0992068	MIC not significant	FALSE	FALSE	FALSE	FALSE	FALSE	FALSE	FALSE	FALSE
pcodonCTCGTG	3682	0.0756362	0.00645396	0.494	0.985	0.513853	0.978574	140	0.179877	0.0273149	0.966	0.997	0.945994	0.988016	0.0510051	MIC not significant	FALSE	FALSE	FALSE	FALSE	FALSE	FALSE	FALSE	FALSE
pcodonCTCGCT	3682	0.0833107	0.00317537	0.014	0.073	0.00764553	0.0673121	136	0.32232	0.0492313	0.003	0.041	0.000679039	0.0365621	0.00942833	Non-monotone	TRUE	TRUE	FALSE	FALSE	TRUE	TRUE	FALSE	FALSE
pcodonCTCGCC	3682	0.0756809	0.000300917	0.471	0.458	0.496307	0.499715	112	0.279527	0.0348795	0.134	0.353	0.139686	0.381089	0.048644	MIC not significant	FALSE	FALSE	FALSE	FALSE	FALSE	FALSE	FALSE	FALSE
pcodonCTCGCA	3682	0.0811201	0.0011809	0.026	0.053	0.019119	0.044785	62	0.298027	0.00726619	0.149	0.104	0.150963	0.104719	0.510065	MIC not significant	FALSE	FALSE	FALSE	FALSE	FALSE	FALSE	FALSE	FALSE
pcodonCTCGCG	3682	0.0763816	9.69365e-05	0.445	0.422	0.439429	0.41885	157	0.298157	0.0461998	0.015	0.113	0.00443972	0.116101	0.00686428	MIC not significant	FALSE	FALSE	FALSE	FALSE	FALSE	TRUE	FALSE	FALSE
pcodonCTCGAA	3682	0.0782643	0.000916031	0.218	0.285	0.214436	0.285032	93	0.239282	0.00121328	0.568	0.459	0.60189	0.497181	0.740292	MIC not significant	FALSE	FALSE	FALSE	FALSE	FALSE	FALSE	FALSE	FALSE
pcodonCTCGAG	3682	0.0750382	0.000258277	0.636	0.635	0.666819	0.6659	70	0.334652	0.0499885	0.076	0.232	0.0751021	0.250141	0.0628062	MIC not significant	FALSE	FALSE	FALSE	FALSE	FALSE	FALSE	FALSE	FALSE
pcodonCTCGGT	3682	0.0746932	0.0019694	0.651	0.814	0.656534	0.823449	157	0.251742	0.00946371	0.171	0.199	0.186425	0.22309	0.225485	MIC not significant	FALSE	FALSE	FALSE	FALSE	FALSE	FALSE	FALSE	FALSE
pcodonCTCGGC	3682	0.0774343	0.000130113	0.267	0.255	0.276416	0.260903	120	0.233687	0.033548	0.413	0.743	0.460718	0.76297	0.0452416	MIC not significant	FALSE	FALSE	FALSE	FALSE	FALSE	FALSE	FALSE	FALSE
pcodonCTCGGA	3682	0.0761472	1.80497e-05	0.521	0.492	0.540704	0.512573	188	0.199793	0.0128555	0.684	0.807	0.709289	0.812285	0.121322	MIC not significant	FALSE	FALSE	FALSE	FALSE	FALSE	FALSE	FALSE	FALSE
pcodonCTCGGG	3682	0.0748586	0.00467511	0.617	0.973	0.635893	0.964205	146	0.214411	0.0206882	0.534	0.748	0.559556	0.761447	0.0832682	MIC not significant	FALSE	FALSE	FALSE	FALSE	FALSE	FALSE	FALSE	FALSE
pcodonCTATTT	3682	0.100855	0.0172391	0	0.157592	5.03514e-09	0.159251	440	0.191861	0.0527992	0.066	0.994	0.0563363	0.983272	1.10729e-06	MIC not significant	TRUE	FALSE	FALSE	FALSE	TRUE	FALSE	FALSE	FALSE
pcodonCTATTC	3682	0.0787272	0.00471414	0.364	0.834	0.374777	0.829083	238	0.238939	0.0499058	0.056	0.679	0.0385964	0.691695	0.000516162	MIC not significant	FALSE	FALSE	FALSE	FALSE	FALSE	FALSE	FALSE	FALSE
pcodonCTATTA	3682	0.0791672	0.00326739	0.359	0.692	0.364449	0.695544	259	0.243449	0.0682914	0.029	0.898	0.0172225	0.885809	2.04835e-05	MIC not significant	FALSE	FALSE	FALSE	FALSE	FALSE	TRUE	FALSE	FALSE
pcodonCTATTG	3682	0.0842987	0.0109698	0.095	0.945	0.0906479	0.943228	359	0.225047	0.030106	0.009	0.179	0.00332624	0.17699	0.00096283	MIC not significant	FALSE	TRUE	FALSE	FALSE	FALSE	TRUE	FALSE	FALSE
pcodonCTATCT	3682	0.0737597	0.000687788	0.718	0.765	0.737828	0.779302	127	0.301531	0.0144424	0.055	0.069	0.036931	0.0567337	0.178363	MIC not significant	FALSE	FALSE	FALSE	FALSE	FALSE	FALSE	FALSE	FALSE
pcodonCTATCC	3682	0.077284	0.000149595	0.281	0.274	0.285519	0.268694	89	0.227035	0.0190408	0.776	0.833	0.772129	0.831316	0.197204	MIC not significant	FALSE	FALSE	FALSE	FALSE	FALSE	FALSE	FALSE	FALSE
pcodonCTATCA	3682	0.0769969	0.000984904	0.324	0.446	0.349	0.46379	68	0.290066	0.030873	0.348	0.501	0.400419	0.544929	0.151512	MIC not significant	FALSE	FALSE	FALSE	FALSE	FALSE	FALSE	FALSE	FALSE
pcodonCTATCG	3682	0.0785304	0.00218789	0.168	0.371	0.176931	0.388101	135	0.247455	0.0139135	0.283	0.368	0.31985	0.398594	0.173028	MIC not significant	FALSE	FALSE	FALSE	FALSE	FALSE	FALSE	FALSE	FALSE
pcodonCTATAT	3682	0.0816997	0.00276915	0.089	0.239	0.07796	0.24664	205	0.234676	0.00688524	0.197	0.21	0.20254	0.225875	0.236876	MIC not significant	FALSE	FALSE	FALSE	FALSE	FALSE	FALSE	FALSE	FALSE
pcodonCTATAC	3682	0.0795897	0.00245559	0.08	0.261	0.0823239	0.265504	107	0.281739	0.0309465	0.163	0.369	0.189744	0.401329	0.069912	MIC not significant	FALSE	FALSE	FALSE	FALSE	FALSE	FALSE	FALSE	FALSE
pcodonCTATAA	3682	0.0811764	0.00149053	0.035	0.071	0.0256	0.0640446	90	0.286297	0.0813487	0.214	0.854	0.23188	0.854836	0.00643354	MIC not significant	FALSE	FALSE	FALSE	FALSE	FALSE	FALSE	FALSE	FALSE
pcodonCTATAG	3682	0.0800454	0.00562685	0.09	0.625	0.0907998	0.637691	130	0.301701	0.0289603	0.03	0.076	0.0168716	0.0790587	0.0529017	MIC not significant	FALSE	FALSE	FALSE	FALSE	FALSE	TRUE	FALSE	FALSE
pcodonCTATGT	3682	0.0877789	0.0128072	0.003	0.652	0.000453428	0.668688	196	0.247939	0.0321576	0.04	0.229	0.0285957	0.240787	0.011906	non-significant monotone/non-monotone	TRUE	FALSE	FALSE	FALSE	TRUE	FALSE	FALSE	FALSE
pcodonCTATGC	3682	0.0777719	0.00115405	0.265	0.378	0.267124	0.368295	136	0.246651	0.0487494	0.292	0.81	0.313419	0.808183	0.00979297	MIC not significant	FALSE	FALSE	FALSE	FALSE	FALSE	FALSE	FALSE	FALSE
pcodonCTATGA	3682	0.0724425	0.00212267	0.898	0.97	0.891466	0.961159	199	0.245554	0.0619811	0.035	0.724	0.0211751	0.730889	0.000391299	MIC not significant	FALSE	FALSE	FALSE	FALSE	FALSE	FALSE	FALSE	FALSE
pcodonCTATGG	3682	0.0786338	0.0024647	0.415	0.655	0.412111	0.659713	257	0.251513	0.0421901	0.005	0.128	0.000983259	0.133193	0.000925704	MIC not significant	FALSE	TRUE	FALSE	FALSE	FALSE	TRUE	FALSE	FALSE
pcodonCTACTT	3682	0.0870475	0.000495728	0.036	0.038	0.030525	0.0339923	459	0.221958	0.0502081	0.000197917	0.216865	4.94448e-06	0.230135	1.2391e-06	non-significant monotone/non-monotone	FALSE	TRUE	FALSE	FALSE	FALSE	TRUE	FALSE	FALSE
pcodonCTACTC	3682	0.0790712	0.00133316	0.131	0.217	0.123627	0.213631	100	0.179515	0.0156563	0.973	0.976	0.943577	0.960452	0.214826	MIC not significant	FALSE	FALSE	FALSE	FALSE	FALSE	FALSE	FALSE	FALSE
pcodonCTACTA	3682	0.0838347	0.00210197	0.079	0.195	0.0802688	0.193045	333	0.225558	0.0763967	0.011	0.991	0.00437493	0.980798	2.97482e-07	MIC not significant	FALSE	TRUE	FALSE	FALSE	FALSE	TRUE	FALSE	FALSE
pcodonCTACTG	3682	0.0801031	0.00430522	0.147	0.518	0.137237	0.544628	192	0.208626	0.0305183	0.466	0.885	0.525666	0.872913	0.0153717	MIC not significant	FALSE	FALSE	FALSE	FALSE	FALSE	FALSE	FALSE	FALSE
pcodonCTACCT	3682	0.0760767	0.00122034	0.494	0.611	0.518752	0.632838	169	0.224697	0.0320601	0.298	0.695	0.317813	0.711746	0.0198446	MIC not significant	FALSE	FALSE	FALSE	FALSE	FALSE	FALSE	FALSE	FALSE
pcodonCTACCC	3682	0.076409	6.36359e-05	0.415	0.37	0.431637	0.396687	75	0.257978	0.000552893	0.45	0.345	0.485174	0.367538	0.841291	MIC not significant	FALSE	FALSE	FALSE	FALSE	FALSE	FALSE	FALSE	FALSE
pcodonCTACCA	3682	0.0779514	0.00146464	0.2	0.346	0.203728	0.362064	80	0.249567	0.0336635	0.423	0.638	0.46326	0.664156	0.103293	MIC not significant	FALSE	FALSE	FALSE	FALSE	FALSE	FALSE	FALSE	FALSE
pcodonCTACCG	3682	0.0728085	6.0224e-05	0.826	0.818	0.827268	0.810851	142	0.253261	0.00257911	0.133	0.117	0.147486	0.122664	0.548365	MIC not significant	FALSE	FALSE	FALSE	FALSE	FALSE	FALSE	FALSE	FALSE
pcodonCTACAT	3682	0.0770535	0.00484663	0.389	0.996	0.39878	0.976416	53	0.242196	0.00908346	0.787	0.721	0.78142	0.721562	0.496131	MIC not significant	FALSE	FALSE	FALSE	FALSE	FALSE	FALSE	FALSE	FALSE
pcodonCTACAC	3682	0.0770637	0.000374135	0.368	0.4	0.407354	0.430997	41	0.349621	0.00449881	0.127	0.083	0.122801	0.0628933	0.675982	MIC not significant	FALSE	FALSE	FALSE	FALSE	FALSE	FALSE	FALSE	FALSE
pcodonCTACAA	3682	0.0759646	0.00210602	0.601	0.951	0.639475	0.926291	42	0.371476	0.000884508	0.056	0.024	0.0383471	0.0126908	0.851687	MIC not significant	FALSE	FALSE	FALSE	FALSE	FALSE	FALSE	FALSE	FALSE
pcodonCTACAG	3682	0.0777824	0.000211347	0.227	0.214	0.2301	0.222913	88	0.345249	0.0424038	0.025	0.095	0.0145227	0.0838956	0.0542568	MIC not significant	FALSE	FALSE	FALSE	FALSE	FALSE	TRUE	FALSE	FALSE
pcodonCTACGT	3682	0.0736005	0.00209841	0.803	0.94	0.803523	0.918095	186	0.233786	0.094952	0.20003	0.999891	0.210564	0.998544	1.87939e-05	MIC not significant	FALSE	FALSE	FALSE	FALSE	FALSE	FALSE	FALSE	FALSE
pcodonCTACGC	3682	0.0766442	0.00272103	0.371	0.747	0.39237	0.743747	87	0.386298	0.051174	0.005	0.018	0.000598112	0.0134972	0.0351276	MIC not significant	FALSE	TRUE	FALSE	FALSE	FALSE	TRUE	FALSE	FALSE
pcodonCTACGA	3682	0.0802605	0.00313689	0.131	0.363	0.126276	0.387714	175	0.268357	0.0444154	0.067	0.404	0.0510672	0.435911	0.00511838	MIC not significant	FALSE	FALSE	FALSE	FALSE	FALSE	FALSE	FALSE	FALSE
pcodonCTACGG	3682	0.0833114	0.00962369	0.022	0.772	0.0156003	0.775152	187	0.216919	0.0229206	0.407	0.722	0.439651	0.726986	0.0386065	MIC not significant	FALSE	FALSE	FALSE	FALSE	FALSE	FALSE	FALSE	FALSE
pcodonCTAATT	3682	0.087297	0.00895172	0.028	0.7	0.0235951	0.712927	451	0.225786	0.0368337	0.000135417	0.041625	3.81968e-06	0.0315357	4.08404e-05	Non-monotone	FALSE	TRUE	FALSE	FALSE	FALSE	TRUE	FALSE	FALSE
pcodonCTAATC	3682	0.0839646	0.0026093	0.021	0.102	0.0185364	0.0837304	222	0.203692	0.0386672	0.4	0.939	0.427318	0.930533	0.00325989	MIC not significant	FALSE	FALSE	FALSE	FALSE	FALSE	FALSE	FALSE	FALSE
pcodonCTAATA	3682	0.0761293	0.00649825	0.616	0.992	0.652746	0.985659	241	0.24698	0.055477	0.018	0.596	0.0114413	0.624824	0.00022467	MIC not significant	FALSE	FALSE	FALSE	FALSE	FALSE	TRUE	FALSE	FALSE
pcodonCTAATG	3682	0.0811743	0.00528327	0.333	0.829	0.341283	0.832693	376	0.215395	0.0255404	0.014	0.131	0.0046117	0.136255	0.00187985	MIC not significant	FALSE	TRUE	FALSE	FALSE	FALSE	TRUE	FALSE	FALSE
pcodonCTAACT	3682	0.0712485	0.00122874	0.947	0.971	0.940852	0.968446	187	0.271468	0.0364115	0.016	0.118	0.00694957	0.121774	0.00889708	MIC not significant	FALSE	FALSE	FALSE	FALSE	FALSE	TRUE	FALSE	FALSE
pcodonCTAACC	3682	0.076399	5.33308e-07	0.375	0.338	0.400533	0.361052	105	0.276635	0.0451046	0.257	0.624	0.278585	0.654763	0.0296257	MIC not significant	FALSE	FALSE	FALSE	FALSE	FALSE	FALSE	FALSE	FALSE
pcodonCTAACA	3682	0.0713473	0.00211982	0.963	0.995	0.952756	0.990552	87	0.358248	0.0812166	0.02	0.245	0.00875973	0.265889	0.00746309	MIC not significant	FALSE	FALSE	FALSE	FALSE	FALSE	TRUE	FALSE	FALSE
pcodonCTAACG	3682	0.0717269	1.00082e-06	0.915	0.903	0.913286	0.901026	183	0.200996	0.00605116	0.734	0.74	0.748763	0.755465	0.295243	MIC not significant	FALSE	FALSE	FALSE	FALSE	FALSE	FALSE	FALSE	FALSE
pcodonCTAAAT	3682	0.0750036	0.00439554	0.598	0.953	0.597863	0.947975	121	0.29975	0.0573807	0.017	0.211	0.00611011	0.216683	0.00813866	MIC not significant	FALSE	FALSE	FALSE	FALSE	FALSE	TRUE	FALSE	FALSE
pcodonCTAAAC	3682	0.0764223	0.00101659	0.354	0.458	0.374665	0.476301	110	0.272105	0.049165	0.217	0.651	0.234627	0.674369	0.0199102	MIC not significant	FALSE	FALSE	FALSE	FALSE	FALSE	FALSE	FALSE	FALSE
pcodonCTAAAA	3682	0.0796148	0.00172711	0.071	0.19	0.05568	0.205607	49	0.295965	0.0650771	0.5	0.828	0.544263	0.827317	0.0770599	MIC not significant	FALSE	FALSE	FALSE	FALSE	FALSE	FALSE	FALSE	FALSE
pcodonCTAAAG	3682	0.0755452	0.000282704	0.523	0.522	0.546284	0.550563	146	0.265697	0.0925441	0.039	0.918	0.0326356	0.911885	0.000189161	MIC not significant	FALSE	FALSE	FALSE	FALSE	FALSE	FALSE	FALSE	FALSE
pcodonCTAAGT	3682	0.0790072	0.00437445	0.15	0.578	0.13982	0.614037	123	0.186503	0.0053112	0.914	0.891	0.894991	0.878372	0.423091	MIC not significant	FALSE	FALSE	FALSE	FALSE	FALSE	FALSE	FALSE	FALSE
pcodonCTAAGC	3682	0.0797224	0.000110399	0.103	0.095	0.0881975	0.0798722	114	0.340314	0.0391979	0.005	0.026	0.000872427	0.0154091	0.0347251	MIC not significant	FALSE	TRUE	FALSE	FALSE	FALSE	TRUE	FALSE	FALSE
pcodonCTAAGA	3682	0.0692878	0.0001594	0.993	0.993	0.988182	0.987676	108	0.340493	0.0592675	0.014	0.107	0.00296518	0.109151	0.0111209	MIC not significant	FALSE	TRUE	FALSE	FALSE	FALSE	TRUE	FALSE	FALSE
pcodonCTAAGG	3682	0.0789307	0.00147245	0.222	0.327	0.231745	0.353892	187	0.199645	0.00345098	0.678	0.662	0.717665	0.691473	0.424505	MIC not significant	FALSE	FALSE	FALSE	FALSE	FALSE	FALSE	FALSE	FALSE
pcodonCTAGTC	3682	0.0807905	0.00173434	0.132	0.22	0.126609	0.234582	213	0.255147	0.0965883	0.017	0.989	0.0115817	0.980295	3.76201e-06	MIC not significant	FALSE	FALSE	FALSE	FALSE	FALSE	TRUE	FALSE	FALSE
pcodonCTAGTG	3682	0.081252	0.003655	0.169	0.51	0.169835	0.512405	268	0.220757	0.0530898	0.099	0.927	0.101867	0.91107	0.000141396	MIC not significant	FALSE	FALSE	FALSE	FALSE	FALSE	FALSE	FALSE	FALSE
pcodonCTAGCT	3682	0.0795512	0.00503168	0.143	0.627	0.141144	0.663444	169	0.194597	0.0147185	0.771	0.893	0.777363	0.871529	0.116122	MIC not significant	FALSE	FALSE	FALSE	FALSE	FALSE	FALSE	FALSE	FALSE
pcodonCTAGCC	3682	0.0742195	0.000402608	0.697	0.719	0.70527	0.721437	97	0.273234	0.0152125	0.177	0.2	0.175609	0.206463	0.228743	MIC not significant	FALSE	FALSE	FALSE	FALSE	FALSE	FALSE	FALSE	FALSE
pcodonCTAGCA	3682	0.0800677	0.0021837	0.063	0.181	0.0572017	0.191098	91	0.247219	3.68193e-05	0.529	0.414	0.569177	0.4444	0.954478	MIC not significant	FALSE	FALSE	FALSE	FALSE	FALSE	FALSE	FALSE	FALSE
pcodonCTAGCG	3682	0.0772716	0.000508826	0.399	0.427	0.391554	0.421784	177	0.211702	0.0126862	0.669	0.777	0.687655	0.780119	0.135536	MIC not significant	FALSE	FALSE	FALSE	FALSE	FALSE	FALSE	FALSE	FALSE
pcodonCTAGAC	3682	0.0781443	0.00436064	0.202	0.931	0.215634	0.908833	48	0.314285	0.0214763	0.387	0.396	0.437828	0.445368	0.319194	MIC not significant	FALSE	FALSE	FALSE	FALSE	FALSE	FALSE	FALSE	FALSE
pcodonCTAGAA	3682	0.0740849	0.00159364	0.725	0.866	0.714475	0.854778	92	0.243914	0.0147167	0.534	0.581	0.571677	0.613535	0.249346	MIC not significant	FALSE	FALSE	FALSE	FALSE	FALSE	FALSE	FALSE	FALSE
pcodonCTAGAG	3682	0.080323	0.00223725	0.038	0.158	0.0328112	0.157058	65	0.326494	0.0355193	0.181	0.278	0.188	0.312005	0.132714	MIC not significant	FALSE	FALSE	FALSE	FALSE	FALSE	FALSE	FALSE	FALSE
pcodonCTAGGT	3682	0.0944759	0.0117508	2.04082e-05	0.121276	3.9305e-06	0.119914	324	0.248534	0.0315236	0.001	0.035	0.000109498	0.0250579	0.00133168	Non-monotone	TRUE	TRUE	FALSE	FALSE	TRUE	TRUE	FALSE	FALSE
pcodonCTAGGC	3682	0.074775	0.00224152	0.713	0.882	0.719624	0.879508	203	0.295717	0.0234173	0.002	0.01	0.000177982	0.00299137	0.0292803	MIC not significant	FALSE	TRUE	FALSE	FALSE	FALSE	TRUE	FALSE	FALSE
pcodonCTAGGA	3682	0.0834965	0.00549413	0.096	0.555	0.0918698	0.557036	299	0.208353	0.0314459	0.155	0.723	0.14511	0.727754	0.00208459	MIC not significant	FALSE	FALSE	FALSE	FALSE	FALSE	FALSE	FALSE	FALSE
pcodonCTAGGG	3682	0.0824189	0.00915799	0.16	0.947	0.159821	0.933453	323	0.221471	0.0336121	0.04	0.422	0.0245543	0.444564	0.000932036	MIC not significant	FALSE	FALSE	FALSE	FALSE	FALSE	FALSE	FALSE	FALSE
pcodonCTGTTT	3682	0.0857165	0.011471	0.025	0.898	0.0253827	0.901436	349	0.214072	0.0248289	0.023	0.16	0.00894968	0.171389	0.00316147	non-significant monotone/non-monotone	FALSE	FALSE	FALSE	FALSE	FALSE	TRUE	FALSE	FALSE
pcodonCTGTTC	3682	0.0872561	0.00734892	0.00412871	0.208188	0.00218071	0.212264	236	0.24481	0.0290674	0.029	0.19	0.0191184	0.200191	0.00867818	non-significant monotone/non-monotone	TRUE	FALSE	FALSE	FALSE	TRUE	FALSE	FALSE	FALSE
pcodonCTGTTA	3682	0.0738924	0.00111095	0.881	0.922	0.877109	0.921491	263	0.20327	0.0259454	0.403	0.838	0.416383	0.847196	0.00887385	MIC not significant	FALSE	FALSE	FALSE	FALSE	FALSE	FALSE	FALSE	FALSE
pcodonCTGTTG	3682	0.0899964	0.01686	0.003	0.959	0.00105905	0.956953	349	0.211814	0.0305035	0.025	0.306	0.0137876	0.338461	0.00105182	non-significant monotone/non-monotone	TRUE	FALSE	FALSE	FALSE	TRUE	TRUE	FALSE	FALSE
pcodonCTGTCT	3682	0.0836043	0.00487414	0.018	0.224	0.0160457	0.225792	187	0.217282	0.0123928	0.421	0.531	0.44257	0.562433	0.12931	MIC not significant	FALSE	FALSE	FALSE	FALSE	FALSE	FALSE	FALSE	FALSE
pcodonCTGTCC	3682	0.0802034	0.00286288	0.083	0.278	0.075959	0.277476	135	0.261075	0.0117057	0.152	0.171	0.160953	0.193404	0.211641	MIC not significant	FALSE	FALSE	FALSE	FALSE	FALSE	FALSE	FALSE	FALSE
pcodonCTGTCA	3682	0.0751661	0.00111504	0.576	0.694	0.594131	0.711132	82	0.312891	0.0104465	0.18	0.169	0.211708	0.198004	0.36014	MIC not significant	FALSE	FALSE	FALSE	FALSE	FALSE	FALSE	FALSE	FALSE
pcodonCTGTCG	3682	0.0781425	0.00392523	0.308	0.723	0.31639	0.726474	185	0.200243	0.0191586	0.712	0.909	0.744725	0.885084	0.0602531	MIC not significant	FALSE	FALSE	FALSE	FALSE	FALSE	FALSE	FALSE	FALSE
pcodonCTGTAT	3682	0.074976	0.0026207	0.751	0.921	0.751447	0.90973	224	0.243282	0.0323508	0.029	0.19	0.0173057	0.201069	0.00695623	MIC not significant	FALSE	FALSE	FALSE	FALSE	FALSE	TRUE	FALSE	FALSE
pcodonCTGTAC	3682	0.0778873	0.00518017	0.209	0.824	0.217176	0.821061	104	0.261822	0.0274146	0.411	0.61	0.440751	0.653252	0.0930094	MIC not significant	FALSE	FALSE	FALSE	FALSE	FALSE	FALSE	FALSE	FALSE
pcodonCTGTAA	3682	0.0810171	0.00612199	0.047	0.569	0.0434591	0.583058	109	0.219327	0.0186981	0.795	0.883	0.790166	0.862529	0.156241	MIC not significant	FALSE	FALSE	FALSE	FALSE	FALSE	FALSE	FALSE	FALSE
pcodonCTGTAG	3682	0.0874285	0.00908872	0.000553398	0.198107	0.000157249	0.20109	152	0.261706	0.0337929	0.15	0.454	0.153496	0.485299	0.0233881	MIC not significant	TRUE	FALSE	FALSE	FALSE	TRUE	FALSE	FALSE	FALSE
pcodonCTGTGT	3682	0.0880753	0.0149957	0.000864078	0.829942	0.000273761	0.830109	189	0.207409	0.0190123	0.545	0.76	0.576651	0.776828	0.0584804	MIC not significant	TRUE	FALSE	FALSE	FALSE	TRUE	FALSE	FALSE	FALSE
pcodonCTGTGC	3682	0.0763358	0.00134927	0.537	0.666	0.536132	0.662938	194	0.219593	0.014967	0.243	0.391	0.259628	0.414559	0.0892495	MIC not significant	FALSE	FALSE	FALSE	FALSE	FALSE	FALSE	FALSE	FALSE
pcodonCTGTGA	3682	0.0762258	0.00523553	0.526	0.942	0.542417	0.943911	196	0.263567	0.0391609	0.019	0.159	0.00665844	0.157227	0.00543079	MIC not significant	FALSE	FALSE	FALSE	FALSE	FALSE	TRUE	FALSE	FALSE
pcodonCTGTGG	3682	0.0838119	0.00681993	0.111	0.733	0.108714	0.736492	371	0.209231	0.0541646	0.032	0.92	0.017007	0.898261	5.89897e-06	MIC not significant	FALSE	FALSE	FALSE	FALSE	FALSE	TRUE	FALSE	FALSE
pcodonCTGCTT	3682	0.075669	0.003338	0.803	0.97	0.808419	0.961342	311	0.196168	0.0262994	0.273	0.736	0.270227	0.755557	0.00413858	MIC not significant	FALSE	FALSE	FALSE	FALSE	FALSE	FALSE	FALSE	FALSE
pcodonCTGCTC	3682	0.076821	0.00177254	0.38	0.564	0.394097	0.582663	144	0.264397	0.0609376	0.058	0.605	0.042935	0.636851	0.00285672	MIC not significant	FALSE	FALSE	FALSE	FALSE	FALSE	FALSE	FALSE	FALSE
pcodonCTGCTA	3682	0.0747743	0.00075533	0.612	0.681	0.608669	0.674164	128	0.255727	0.000414662	0.301	0.232	0.333303	0.248309	0.819531	MIC not significant	FALSE	FALSE	FALSE	FALSE	FALSE	FALSE	FALSE	FALSE
pcodonCTGCTG	3682	0.0799567	0.00470279	0.254	0.74	0.262961	0.73955	249	0.203089	0.0281471	0.326	0.807	0.349574	0.805229	0.00798064	MIC not significant	FALSE	FALSE	FALSE	FALSE	FALSE	FALSE	FALSE	FALSE
pcodonCTGCCT	3682	0.0850761	0.000286022	0.03	0.031	0.0224949	0.0235716	295	0.193366	0.012908	0.467	0.694	0.495082	0.703113	0.0512472	MIC not significant	FALSE	FALSE	FALSE	FALSE	FALSE	FALSE	FALSE	FALSE
pcodonCTGCCC	3682	0.0752989	0.0011474	0.598	0.706	0.606708	0.723777	82	0.28156	0.105312	0.413	0.998	0.446017	0.98405	0.00306464	MIC not significant	FALSE	FALSE	FALSE	FALSE	FALSE	FALSE	FALSE	FALSE
pcodonCTGCCA	3682	0.0762476	0.00259514	0.405	0.73	0.419673	0.744427	91	0.25618	0.0171635	0.437	0.502	0.479844	0.540144	0.215783	MIC not significant	FALSE	FALSE	FALSE	FALSE	FALSE	FALSE	FALSE	FALSE
pcodonCTGCCG	3682	0.0793192	0.00168221	0.342	0.498	0.343791	0.504962	254	0.200671	0.0318914	0.319	0.856	0.357439	0.85015	0.00430272	MIC not significant	FALSE	FALSE	FALSE	FALSE	FALSE	FALSE	FALSE	FALSE
pcodonCTGCAT	3682	0.0781837	0.00622215	0.197	0.997	0.202215	0.985575	49	0.393186	0.014585	0.073	0.053	0.0522873	0.0408802	0.408471	MIC not significant	FALSE	FALSE	FALSE	FALSE	FALSE	FALSE	FALSE	FALSE
pcodonCTGCAG	3682	0.077251	0.0013624	0.276	0.427	0.301436	0.441187	112	0.27907	0.0013627	0.121	0.092	0.121426	0.0828773	0.699187	MIC not significant	FALSE	FALSE	FALSE	FALSE	FALSE	FALSE	FALSE	FALSE
pcodonCTGCGT	3682	0.0762063	0.000524277	0.459	0.49	0.468126	0.498756	151	0.203423	0.0322489	0.864	0.992	0.855538	0.974565	0.02736	MIC not significant	FALSE	FALSE	FALSE	FALSE	FALSE	FALSE	FALSE	FALSE
pcodonCTGCGC	3682	0.0785521	0.00237433	0.154	0.416	0.154	0.439501	72	0.271489	9.61926e-07	0.41	0.299	0.453694	0.331572	0.993476	MIC not significant	FALSE	FALSE	FALSE	FALSE	FALSE	FALSE	FALSE	FALSE
pcodonCTGCGA	3682	0.073227	0.00100675	0.798	0.861	0.792358	0.859455	106	0.217082	0.0222039	0.891	0.964	0.871515	0.938286	0.127388	MIC not significant	FALSE	FALSE	FALSE	FALSE	FALSE	FALSE	FALSE	FALSE
pcodonCTGCGG	3682	0.0785654	0.00622794	0.207	0.832	0.204863	0.834086	159	0.283725	0.00835883	0.027	0.03	0.0124835	0.0153984	0.251732	MIC not significant	FALSE	FALSE	FALSE	FALSE	FALSE	TRUE	FALSE	FALSE
pcodonCTGATT	3682	0.0840625	0.00749024	0.192	0.884	0.192992	0.882724	501	0.16404	0.0176979	0.314	0.811	0.354167	0.807435	0.00284951	MIC not significant	FALSE	FALSE	FALSE	FALSE	FALSE	FALSE	FALSE	FALSE
pcodonCTGATC	3682	0.0796123	0.000750333	0.256	0.287	0.265214	0.312699	236	0.26671	0.0171675	0.008	0.016	0.00134024	0.00795903	0.0443432	MIC not significant	FALSE	TRUE	FALSE	FALSE	FALSE	TRUE	FALSE	FALSE
pcodonCTGATA	3682	0.0805517	0.00840666	0.189	0.948	0.192671	0.938186	251	0.262308	0.0180871	0.003	0.007	0.000382591	0.0035142	0.0331928	MIC not significant	FALSE	TRUE	FALSE	FALSE	FALSE	TRUE	FALSE	FALSE
pcodonCTGATG	3682	0.0945679	0.0149031	0.000128713	0.514297	2.8498e-05	0.526753	429	0.172849	0.0323349	0.259	0.966	0.271826	0.95663	0.000180993	MIC not significant	TRUE	FALSE	FALSE	FALSE	TRUE	FALSE	FALSE	FALSE
[truncated: 2,767 more rows]

## Sheet: Description
Column name	Description
Name	The name of the feature
Number of genes	The number of genes with the feature and gene expression
[truncated: 23 more rows]
