# Supplementary material for: Most associations between transcript features and gene expression are monotonic
Source: Royal Society of Chemistry journal article supplement (doi:10.1039/c3mb70617f), 2014-03-17
Supplement: c3mb70617f4.xlsx [file c3mb70617f4.xlsx]

## Sheet: Data
Name	Number of genes	MIC	Spearman (rho2)	MIC Empirical p-value	Diff Empirical p-value	Z Score p-value	Diff Z Score p-value	Number of genes Filtered	MIC Filtered	Spearman Filtered (rho2)	MIC Empirical p-value Filtered	Diff Empirical p-value Filtered	Z Score p-value Filtered	Diff Z Score p-value Filtered	Spearman p-value Filtered	Classification	MIC empirical p-value pass FDR	Filtered MIC empirical p-value pass FDR	empirical p-value non-monotonicity pass FDR	empirical p-value Monotonicity pass FDR	MIC Z score p-value pass FDR	Filtered MIC Z score p-value pass FDR	Z score p-value non-monotonicity pass FDR	Z score p-value monotonicity pass FDR
utr5gc	1267	0.121409	0.0010824	0.402	0.414	0.427789	0.440564	1265	0.119505	0.000942955	0.494	0.502	0.525989	0.534584	0.275119	MIC not significant	FALSE	FALSE	FALSE	FALSE	FALSE	FALSE	FALSE	FALSE
utr5gc40	1267	0.117274	0.00170223	0.621	0.663	0.635021	0.67796	1265	0.116874	0.00152894	0.654	0.691	0.666547	0.700368	0.164565	MIC not significant	FALSE	FALSE	FALSE	FALSE	FALSE	FALSE	FALSE	FALSE
utr5meanFE	1139	0.128034	0.00108429	0.448	0.46	0.481609	0.494398	1139	0.128034	0.00108429	0.438	0.449	0.459711	0.469438	0.266831	MIC not significant	FALSE	FALSE	FALSE	FALSE	FALSE	FALSE	FALSE	FALSE
utr5meanFE40	1139	0.123304	0.00889129	0.51	0.842	0.497063	0.850891	1139	0.123304	0.00889129	0.521	0.85	0.534611	0.860941	0.00144289	MIC not significant	FALSE	FALSE	FALSE	FALSE	FALSE	FALSE	FALSE	FALSE
utr5bestATG	1267	0.110863	0.00386702	0.421	0.584	0.433758	0.607158	104	0.22095	0.0284876	0.885	0.975	0.86179	0.94865	0.086767	MIC not significant	FALSE	FALSE	FALSE	FALSE	FALSE	FALSE	FALSE	FALSE
utr5MeanATG	1267	0.110863	0.00386859	0.428	0.603	0.44738	0.619325	104	0.289604	0.028538	0.185	0.35	0.209663	0.385284	0.0864853	MIC not significant	FALSE	FALSE	FALSE	FALSE	FALSE	FALSE	FALSE	FALSE
utr5bestATG30C	1267	0.120998	0.00724614	0.027	0.148	0.0223325	0.151651	68	0.225346	0.0247458	0.879	0.941	0.86084	0.910394	0.199668	MIC not significant	FALSE	FALSE	FALSE	FALSE	FALSE	FALSE	FALSE	FALSE
utr5MeanATG30C	1267	0.120998	0.00725001	0.027	0.156	0.0211871	0.148527	68	0.356853	0.0250349	0.067	0.082	0.0480562	0.0698539	0.197037	MIC not significant	FALSE	FALSE	FALSE	FALSE	FALSE	FALSE	FALSE	FALSE
utr5bestATG0	1267	0.112699	0.00181902	0.211	0.256	0.221672	0.271272	58	0.259817	0.0175043	0.483	0.492	0.539359	0.545168	0.322163	MIC not significant	FALSE	FALSE	FALSE	FALSE	FALSE	FALSE	FALSE	FALSE
utr5MeanATG0	1267	0.112699	0.00182552	0.178	0.229	0.199624	0.246052	58	0.312144	0.0206095	0.137	0.165	0.143196	0.16786	0.281504	MIC not significant	FALSE	FALSE	FALSE	FALSE	FALSE	FALSE	FALSE	FALSE
utr5bestATG1	1267	0.102814	0.000206924	0.78	0.751	0.790196	0.763569	51	0.244421	0.0891333	0.809	0.996	0.808202	0.984047	0.0337349	MIC not significant	FALSE	FALSE	FALSE	FALSE	FALSE	FALSE	FALSE	FALSE
utr5MeanATG1	1267	0.102814	0.000201834	0.794	0.751	0.797949	0.769236	51	0.270589	0.0676942	0.632	0.934	0.66601	0.912949	0.0654302	MIC not significant	FALSE	FALSE	FALSE	FALSE	FALSE	FALSE	FALSE	FALSE
utr5bestATG2	1267	0.113408	0.00325738	0.152	0.267	0.157147	0.279929	49	0.333686	0.00929847	0.264	0.213	0.2921	0.226865	0.508661	MIC not significant	FALSE	FALSE	FALSE	FALSE	FALSE	FALSE	FALSE	FALSE
utr5MeanATG2	1267	0.113408	0.00325628	0.17	0.266	0.164055	0.277483	49	0.307589	0.00894762	0.428	0.366	0.487066	0.414861	0.5168	MIC not significant	FALSE	FALSE	FALSE	FALSE	FALSE	FALSE	FALSE	FALSE
utr5numATGs	1267	0.110863	0.00364342	0.445	0.603	0.454316	0.613997	104	0.20864	0.00161809	0.772	0.684	0.781956	0.715793	0.685164	MIC not significant	FALSE	FALSE	FALSE	FALSE	FALSE	FALSE	FALSE	FALSE
utr5numATGs0	1267	0.112699	0.00178474	0.193	0.237	0.220916	0.267828	58	0.239328	0.00829483	0.397	0.315	0.452343	0.366065	0.496549	MIC not significant	FALSE	FALSE	FALSE	FALSE	FALSE	FALSE	FALSE	FALSE
utr5numATGs1	1267	0.102814	0.000210968	0.8	0.778	0.803182	0.777767	51	0.261514	0.154973	0.451684	0.999263	0.502762	0.992935	0.00426277	MIC not significant	FALSE	FALSE	FALSE	FALSE	FALSE	FALSE	FALSE	FALSE
utr5numATGs2	1267	0.113408	0.00322122	0.151	0.256	0.167103	0.285576	49	0.229228	0.000326038	0.739	0.607	0.754912	0.639441	0.901994	MIC not significant	FALSE	FALSE	FALSE	FALSE	FALSE	FALSE	FALSE	FALSE
utr5numATGs30C	1267	0.120998	0.0071109	0.024	0.141	0.0201378	0.140317	68	0.196944	0.0023528	0.866	0.808	0.854246	0.802735	0.694464	MIC not significant	FALSE	FALSE	FALSE	FALSE	FALSE	FALSE	FALSE	FALSE
utr5distATG	1267	0.110863	0.00391983	0.408	0.61	0.441303	0.623858	104	0.260745	0.0372896	0.347	0.686	0.403359	0.70003	0.0495279	MIC not significant	FALSE	FALSE	FALSE	FALSE	FALSE	FALSE	FALSE	FALSE
utr5distATG0	1267	0.112699	0.00183049	0.207	0.246	0.220936	0.271122	58	0.200703	0.0191843	0.891	0.904	0.868151	0.878967	0.299789	MIC not significant	FALSE	FALSE	FALSE	FALSE	FALSE	FALSE	FALSE	FALSE
utr5distATG1	1267	0.102814	0.000191305	0.754	0.719	0.764803	0.736658	51	0.263809	0.0333654	0.64	0.73	0.662336	0.74722	0.199509	MIC not significant	FALSE	FALSE	FALSE	FALSE	FALSE	FALSE	FALSE	FALSE
utr5distATG2	1267	0.113408	0.00327379	0.145	0.268	0.152071	0.272764	49	0.326207	0.0314893	0.27	0.332	0.306341	0.3771	0.222538	MIC not significant	FALSE	FALSE	FALSE	FALSE	FALSE	FALSE	FALSE	FALSE
utr5Lens	1267	0.157691	0.0411588	2.63158e-05	0.633211	2.42262e-07	0.645056	1267	0.157691	0.0411588	2.63158e-05	0.633776	3.31229e-07	0.646619	3.09539e-13	non-significant monotone/non-monotone	TRUE	TRUE	FALSE	FALSE	TRUE	TRUE	FALSE	FALSE
utr5uORFsBio	1267	0.110863	0.00364342	0.417	0.57	0.433082	0.603857	104	0.20864	0.00161809	0.775	0.681	0.787159	0.714379	0.685164	MIC not significant	FALSE	FALSE	FALSE	FALSE	FALSE	FALSE	FALSE	FALSE
u5maxLenuORFs	1267	0.110863	0.00366845	0.442	0.593	0.45272	0.610794	104	0.249177	0.00254421	0.401	0.325	0.439088	0.364357	0.611105	MIC not significant	FALSE	FALSE	FALSE	FALSE	FALSE	FALSE	FALSE	FALSE
u5meanLenuORFs	1267	0.110863	0.00367676	0.41	0.567	0.435482	0.596745	104	0.227592	0.0031182	0.696	0.633	0.713574	0.656251	0.573418	MIC not significant	FALSE	FALSE	FALSE	FALSE	FALSE	FALSE	FALSE	FALSE
u5maxCostuORFs	1267	0.110863	0.00364972	0.435	0.617	0.462259	0.622657	104	0.248435	0.00163081	0.561	0.458	0.587157	0.487157	0.683994	MIC not significant	FALSE	FALSE	FALSE	FALSE	FALSE	FALSE	FALSE	FALSE
u5meanCostuORFs	1267	0.110863	0.00363194	0.446	0.586	0.459227	0.62089	104	0.287443	0.000916834	0.174	0.12	0.201078	0.135749	0.760269	MIC not significant	FALSE	FALSE	FALSE	FALSE	FALSE	FALSE	FALSE	FALSE
utr5uORFs30C	1267	0.120998	0.0071109	0.028	0.133	0.0189181	0.137761	68	0.196944	0.0023528	0.869	0.797	0.860076	0.799417	0.694464	MIC not significant	FALSE	FALSE	FALSE	FALSE	FALSE	FALSE	FALSE	FALSE
u5maxLenuORFs30C	1267	0.120998	0.00713454	0.038	0.143	0.0249521	0.159754	68	0.19148	0.00328875	0.959	0.909	0.932433	0.88943	0.642278	MIC not significant	FALSE	FALSE	FALSE	FALSE	FALSE	FALSE	FALSE	FALSE
u5meanLenuORFs30C	1267	0.120998	0.0071571	0.032	0.149	0.0221039	0.145544	68	0.215356	0.00600683	0.872	0.818	0.850819	0.804616	0.529867	MIC not significant	FALSE	FALSE	FALSE	FALSE	FALSE	FALSE	FALSE	FALSE
u5maxCostuORFs30C	1267	0.120998	0.00707652	0.039	0.161	0.0257471	0.154191	68	0.192756	4.38669e-05	0.989	0.963	0.962285	0.927366	0.95725	MIC not significant	FALSE	FALSE	FALSE	FALSE	FALSE	FALSE	FALSE	FALSE
u5meanCostuORFs30C	1267	0.120998	0.00710444	0.035	0.186	0.03044	0.176355	68	0.198673	0.000780822	0.973	0.931	0.948516	0.90702	0.821048	MIC not significant	FALSE	FALSE	FALSE	FALSE	FALSE	FALSE	FALSE	FALSE
utr5uORFs0	1267	0.112699	0.00178474	0.197	0.234	0.214579	0.259833	58	0.239328	0.00829483	0.4	0.341	0.461974	0.380181	0.496549	MIC not significant	FALSE	FALSE	FALSE	FALSE	FALSE	FALSE	FALSE	FALSE
utr5uORFs1	1267	0.102814	0.000210968	0.783	0.755	0.786992	0.760941	51	0.261514	0.154973	0.453342	0.999171	0.504701	0.99253	0.00426277	MIC not significant	FALSE	FALSE	FALSE	FALSE	FALSE	FALSE	FALSE	FALSE
utr5uORFs2	1267	0.113408	0.00322122	0.172	0.283	0.164761	0.287381	49	0.229228	0.000326038	0.724	0.608	0.750481	0.645384	0.901994	MIC not significant	FALSE	FALSE	FALSE	FALSE	FALSE	FALSE	FALSE	FALSE
u5maxLenuORFs0	1267	0.112699	0.00177194	0.201	0.234	0.202179	0.24978	58	0.276789	0.00289178	0.271	0.182	0.293348	0.193812	0.688483	MIC not significant	FALSE	FALSE	FALSE	FALSE	FALSE	FALSE	FALSE	FALSE
u5maxLenuORFs1	1267	0.102814	0.000189074	0.772	0.737	0.779902	0.751356	51	0.204451	0.0313151	0.945	0.964	0.906054	0.936716	0.214143	MIC not significant	FALSE	FALSE	FALSE	FALSE	FALSE	FALSE	FALSE	FALSE
u5maxLenuORFs2	1267	0.113408	0.00324456	0.162	0.284	0.161913	0.277288	49	0.320047	0.0033305	0.238	0.171	0.250705	0.170309	0.693675	MIC not significant	FALSE	FALSE	FALSE	FALSE	FALSE	FALSE	FALSE	FALSE
u5meanLenuORFs0	1267	0.112699	0.00176211	0.189	0.227	0.196059	0.239017	58	0.198991	0.00102214	0.87	0.761	0.855668	0.768599	0.811692	MIC not significant	FALSE	FALSE	FALSE	FALSE	FALSE	FALSE	FALSE	FALSE
u5meanLenuORFs1	1267	0.102814	0.000179834	0.788	0.76	0.794983	0.768372	51	0.246548	0.011194	0.713	0.673	0.745429	0.693936	0.459955	MIC not significant	FALSE	FALSE	FALSE	FALSE	FALSE	FALSE	FALSE	FALSE
u5meanLenuORFs2	1267	0.113408	0.0032588	0.173	0.268	0.167332	0.286664	49	0.298097	0.0064265	0.411	0.313	0.462569	0.357266	0.583998	MIC not significant	FALSE	FALSE	FALSE	FALSE	FALSE	FALSE	FALSE	FALSE
u5maxCostuORFs0	1267	0.112699	0.00175954	0.226	0.258	0.220728	0.265971	58	0.27608	0.000788814	0.372	0.256	0.40845	0.280269	0.834229	MIC not significant	FALSE	FALSE	FALSE	FALSE	FALSE	FALSE	FALSE	FALSE
u5maxCostuORFs1	1267	0.102814	0.000186654	0.761	0.722	0.781011	0.748302	51	0.222847	0.0254889	0.917	0.935	0.887673	0.91129	0.263107	MIC not significant	FALSE	FALSE	FALSE	FALSE	FALSE	FALSE	FALSE	FALSE
u5maxCostuORFs2	1267	0.113408	0.00324015	0.183	0.302	0.18796	0.308829	49	0.346951	0.00212739	0.209	0.134	0.22218	0.136947	0.752991	MIC not significant	FALSE	FALSE	FALSE	FALSE	FALSE	FALSE	FALSE	FALSE
u5meanCostuORFs0	1267	0.112699	0.00174909	0.189	0.231	0.197154	0.242322	58	0.261888	2.18642e-05	0.463	0.333	0.489801	0.350316	0.972211	MIC not significant	FALSE	FALSE	FALSE	FALSE	FALSE	FALSE	FALSE	FALSE
u5meanCostuORFs1	1267	0.102814	0.000175136	0.783	0.738	0.789181	0.7578	51	0.189649	0.00467523	0.99	0.965	0.970072	0.945297	0.633538	MIC not significant	FALSE	FALSE	FALSE	FALSE	FALSE	FALSE	FALSE	FALSE
u5meanCostuORFs2	1267	0.113408	0.00326356	0.158	0.246	0.148024	0.265739	49	0.293779	0.00745341	0.462	0.371	0.517298	0.421507	0.555302	MIC not significant	FALSE	FALSE	FALSE	FALSE	FALSE	FALSE	FALSE	FALSE
rutr5bestATG	1263	0.121683	0.000747782	0.62	0.611	0.635944	0.634133	1262	0.121942	0.000834085	0.617	0.62	0.625799	0.627192	0.305284	MIC not significant	FALSE	FALSE	FALSE	FALSE	FALSE	FALSE	FALSE	FALSE
rutr5MeanATG	1263	0.121977	0.000738012	0.614	0.621	0.634464	0.634846	1262	0.121942	0.000823739	0.617	0.623	0.635426	0.63811	0.308304	MIC not significant	FALSE	FALSE	FALSE	FALSE	FALSE	FALSE	FALSE	FALSE
rutr5bestATG30C	1263	0.126372	0.000446939	0.342	0.324	0.354424	0.334724	1262	0.126643	0.000513459	0.326	0.305	0.346594	0.330806	0.421235	MIC not significant	FALSE	FALSE	FALSE	FALSE	FALSE	FALSE	FALSE	FALSE
rutr5MeanATG30C	1263	0.126372	0.000445114	0.327	0.306	0.352363	0.332868	1262	0.126643	0.0005115	0.352	0.334	0.357133	0.341453	0.422122	MIC not significant	FALSE	FALSE	FALSE	FALSE	FALSE	FALSE	FALSE	FALSE
rutr5bestATG0	1263	0.122785	7.92884e-05	0.535	0.486	0.573706	0.529892	1262	0.121332	0.000108245	0.624	0.585	0.637729	0.597488	0.711945	MIC not significant	FALSE	FALSE	FALSE	FALSE	FALSE	FALSE	FALSE	FALSE
rutr5MeanATG0	1263	0.122785	7.88515e-05	0.567	0.509	0.587721	0.542107	1262	0.121332	0.000107734	0.654	0.611	0.651368	0.617046	0.712596	MIC not significant	FALSE	FALSE	FALSE	FALSE	FALSE	FALSE	FALSE	FALSE
rutr5bestATG1	1263	0.127201	4.21096e-07	0.27	0.244	0.291435	0.254333	1262	0.126061	6.9871e-07	0.369	0.332	0.394186	0.346598	0.976334	MIC not significant	FALSE	FALSE	FALSE	FALSE	FALSE	FALSE	FALSE	FALSE
rutr5MeanATG1	1263	0.124036	7.17348e-07	0.479	0.434	0.492081	0.445528	1262	0.123226	4.06123e-07	0.536	0.483	0.549694	0.504068	0.981956	MIC not significant	FALSE	FALSE	FALSE	FALSE	FALSE	FALSE	FALSE	FALSE
rutr5bestATG2	1263	0.124746	9.39223e-05	0.416	0.375	0.443594	0.400497	1262	0.124671	0.000125169	0.442	0.409	0.474299	0.431327	0.691319	MIC not significant	FALSE	FALSE	FALSE	FALSE	FALSE	FALSE	FALSE	FALSE
rutr5MeanATG2	1263	0.124746	8.56493e-05	0.421	0.375	0.452296	0.409745	1262	0.124671	0.000115576	0.445	0.399	0.46998	0.428243	0.702799	MIC not significant	FALSE	FALSE	FALSE	FALSE	FALSE	FALSE	FALSE	FALSE
rutr5bestATG030C	1263	0.127816	3.16349e-08	0.277	0.239	0.281021	0.243751	1262	0.127338	2.76219e-06	0.263	0.22	0.288018	0.245572	0.952966	MIC not significant	FALSE	FALSE	FALSE	FALSE	FALSE	FALSE	FALSE	FALSE
rutr5MeanATG030C	1263	0.127816	3.06365e-08	0.264	0.23	0.275635	0.237272	1262	0.127338	2.75269e-06	0.286	0.252	0.299426	0.262312	0.953047	MIC not significant	FALSE	FALSE	FALSE	FALSE	FALSE	FALSE	FALSE	FALSE
rutr5bestATG130C	1263	0.127967	5.96873e-05	0.266	0.229	0.279109	0.243023	1262	0.128507	3.91358e-05	0.235	0.196	0.236946	0.200325	0.824299	MIC not significant	FALSE	FALSE	FALSE	FALSE	FALSE	FALSE	FALSE	FALSE
rutr5MeanATG130C	1263	0.127967	5.94093e-05	0.244	0.212	0.25474	0.220253	1262	0.128507	3.89106e-05	0.246	0.216	0.259071	0.222851	0.824797	MIC not significant	FALSE	FALSE	FALSE	FALSE	FALSE	FALSE	FALSE	FALSE
rutr5bestATG230C	1263	0.128884	5.11775e-05	0.233	0.193	0.235845	0.19864	1262	0.128531	7.46309e-05	0.22	0.201	0.240328	0.209462	0.759151	MIC not significant	FALSE	FALSE	FALSE	FALSE	FALSE	FALSE	FALSE	FALSE
rutr5MeanATG230C	1263	0.128884	5.10386e-05	0.206	0.178	0.219267	0.19081	1262	0.128531	7.4463e-05	0.255	0.226	0.256309	0.224382	0.759414	MIC not significant	FALSE	FALSE	FALSE	FALSE	FALSE	FALSE	FALSE	FALSE
utr5_PARS_numBP_all	1066	0.138994	0.0142903	0.063	0.451	0.0550188	0.47768	533	0.173357	0.00266975	0.111	0.116	0.09601	0.107417	0.233701	MIC not significant	FALSE	FALSE	FALSE	FALSE	FALSE	FALSE	FALSE	FALSE
orfgc	1267	0.130733	0.0227192	0.147	0.996	0.152952	0.988876	1267	0.130733	0.0227192	0.143	0.993	0.135972	0.98743	7.01751e-08	MIC not significant	FALSE	FALSE	FALSE	FALSE	FALSE	FALSE	FALSE	FALSE
orfmeanFE	1267	0.126474	0.00603562	0.379	0.69	0.395905	0.705647	1267	0.126474	0.00603562	0.369	0.669	0.387302	0.68873	0.00567161	MIC not significant	FALSE	FALSE	FALSE	FALSE	FALSE	FALSE	FALSE	FALSE
orfbestATG	1267	0.156917	0.0565191	0	0.99999	1.23359e-07	0.999449	1266	0.157056	0.0558601	1.31579e-05	0.999882	1.11758e-07	0.999226	1.56597e-17	Monotone	TRUE	TRUE	FALSE	TRUE	TRUE	TRUE	FALSE	TRUE
orfMeanATG	1267	0.145228	0.0108593	0.002	0.049	0.000474093	0.0414893	1266	0.143559	0.0105229	0.006	0.058	0.00112492	0.0634905	0.000258001	non-significant monotone/non-monotone	TRUE	TRUE	FALSE	FALSE	TRUE	TRUE	FALSE	FALSE
orfbestATG30C	1267	0.124474	0.00505193	0.328	0.559	0.332636	0.572712	930	0.132742	0.0017006	0.689	0.719	0.712135	0.738128	0.208955	MIC not significant	FALSE	FALSE	FALSE	FALSE	FALSE	FALSE	FALSE	FALSE
orfMeanATG30C	1267	0.119926	0.00414793	0.569	0.766	0.600094	0.774299	930	0.142267	0.00082913	0.259	0.248	0.272194	0.266042	0.380422	MIC not significant	FALSE	FALSE	FALSE	FALSE	FALSE	FALSE	FALSE	FALSE
orfbestATG200C	1267	0.126118	7.81559e-05	0.313	0.277	0.331181	0.292249	1266	0.125821	0.000114044	0.34	0.309	0.360725	0.326129	0.704235	MIC not significant	FALSE	FALSE	FALSE	FALSE	FALSE	FALSE	FALSE	FALSE
orfMeanATG200C	1267	0.134006	8.20046e-06	0.072	0.058	0.063449	0.051187	1266	0.134164	2.19397e-05	0.069	0.047	0.0654396	0.0510392	0.867748	MIC not significant	FALSE	FALSE	FALSE	FALSE	FALSE	FALSE	FALSE	FALSE
orfbestATG0	1267	0.158629	0.0934763	0	1	2.52568e-08	1	1216	0.153086	0.0789619	0.000267327	1	1.10546e-05	1	1.67284e-23	Monotone	TRUE	TRUE	FALSE	TRUE	TRUE	TRUE	FALSE	TRUE
orfMeanATG0	1267	0.145861	0.0460477	0.003	1	0.000411524	0.999822	1216	0.139928	0.0328556	0.024	0.997	0.0205015	0.99508	1.92636e-10	Monotone	TRUE	TRUE	FALSE	TRUE	TRUE	TRUE	FALSE	TRUE
orfbestATG1	1267	0.144504	0.0360693	0.001	0.996	0.000421215	0.982853	1258	0.141746	0.0346268	0.007	0.999	0.00288233	0.993723	2.89822e-11	Monotone	TRUE	TRUE	FALSE	TRUE	TRUE	TRUE	FALSE	TRUE
orfMeanATG1	1267	0.13022	0.0042297	0.189	0.349	0.194178	0.364165	1258	0.129049	0.00350755	0.272	0.405	0.284341	0.436735	0.0357105	MIC not significant	FALSE	FALSE	FALSE	FALSE	FALSE	FALSE	FALSE	FALSE
orfbestATG2	1267	0.139081	0.0355397	0.008	0.999	0.00619143	0.996584	1074	0.132527	0.00976388	0.262	0.742	0.287001	0.753899	0.00118511	MIC not significant	TRUE	FALSE	FALSE	FALSE	TRUE	FALSE	FALSE	FALSE
orfMeanATG2	1267	0.146676	0.0246529	0.004	0.477	0.000187933	0.491486	1074	0.127906	0.00300799	0.546	0.643	0.554379	0.665925	0.0723924	MIC not significant	TRUE	FALSE	FALSE	FALSE	TRUE	FALSE	FALSE	FALSE
orfbestATG030C	1267	0.11132	0.00390329	0.785	0.914	0.797008	0.897859	298	0.195378	0.0164265	0.436	0.731	0.458458	0.738857	0.0269445	MIC not significant	FALSE	FALSE	FALSE	FALSE	FALSE	FALSE	FALSE	FALSE
orfMeanATG030C	1267	0.11132	0.00393288	0.787	0.905	0.79427	0.895839	298	0.183767	0.0155952	0.687	0.901	0.703379	0.895873	0.0311493	MIC not significant	FALSE	FALSE	FALSE	FALSE	FALSE	FALSE	FALSE	FALSE
orfbestATG130C	1267	0.133752	0.00671532	0.028	0.137	0.0235966	0.133705	723	0.139474	0.00482947	0.74	0.835	0.729143	0.83336	0.0618128	MIC not significant	FALSE	FALSE	FALSE	FALSE	FALSE	FALSE	FALSE	FALSE
orfMeanATG130C	1267	0.135206	0.006542	0.031	0.11	0.0202339	0.107409	723	0.157272	0.00439926	0.127	0.185	0.118236	0.188521	0.0746971	MIC not significant	FALSE	FALSE	FALSE	FALSE	FALSE	FALSE	FALSE	FALSE
orfbestATG230C	1267	0.121517	0.00553585	0.14	0.323	0.145305	0.350107	195	0.219414	0.00789088	0.272	0.311	0.315086	0.351767	0.21686	MIC not significant	FALSE	FALSE	FALSE	FALSE	FALSE	FALSE	FALSE	FALSE
orfMeanATG230C	1267	0.121517	0.00552453	0.175	0.372	0.174495	0.382484	195	0.203231	0.00832334	0.553	0.628	0.589406	0.644663	0.204639	MIC not significant	FALSE	FALSE	FALSE	FALSE	FALSE	FALSE	FALSE	FALSE
orfbestATG0200C	1267	0.119306	0.00167941	0.7	0.754	0.718176	0.760725	1159	0.122801	3.74714e-06	0.695	0.649	0.70747	0.662718	0.947513	MIC not significant	FALSE	FALSE	FALSE	FALSE	FALSE	FALSE	FALSE	FALSE
orfMeanATG0200C	1267	0.138388	0.00259997	0.021	0.031	0.0101121	0.0210941	1159	0.141826	0.000102056	0.035	0.025	0.024662	0.0189007	0.731177	Non-monotone	FALSE	FALSE	FALSE	FALSE	TRUE	TRUE	FALSE	FALSE
orfbestATG1200C	1267	0.134431	0.000919043	0.06	0.063	0.0503381	0.0550091	1256	0.136729	0.00120033	0.051	0.052	0.0365223	0.042766	0.219825	MIC not significant	FALSE	FALSE	FALSE	FALSE	FALSE	FALSE	FALSE	FALSE
orfMeanATG1200C	1267	0.14305	0.0012447	0.005	0.007	0.00120671	0.00155014	1256	0.143107	0.00157508	0.009	0.012	0.00298133	0.00439355	0.1598	Non-monotone	TRUE	TRUE	FALSE	FALSE	TRUE	TRUE	FALSE	FALSE
orfbestATG2200C	1267	0.116924	0.000895787	0.709	0.712	0.730732	0.73557	793	0.138861	0.00296753	0.661	0.739	0.66745	0.735899	0.125338	MIC not significant	FALSE	FALSE	FALSE	FALSE	FALSE	FALSE	FALSE	FALSE
orfMeanATG2200C	1267	0.116958	0.000741175	0.685	0.693	0.714183	0.711068	793	0.14054	0.00228788	0.586	0.643	0.620399	0.66305	0.178431	MIC not significant	FALSE	FALSE	FALSE	FALSE	FALSE	FALSE	FALSE	FALSE
orfnumATGs	1267	0.203276	0.190934	0	1	9.72227e-29	1	1266	0.20292	0.190039	0	1	2.68685e-28	1	7.23508e-60	Monotone	TRUE	TRUE	FALSE	TRUE	TRUE	TRUE	FALSE	TRUE
orfnumATGs0	1267	0.201672	0.190981	0	1	1.40686e-27	1	1216	0.197821	0.18018	0	1	2.38409e-23	1	2.27645e-54	Monotone	TRUE	TRUE	FALSE	TRUE	TRUE	TRUE	FALSE	TRUE
orfnumATGs1	1267	0.198197	0.160094	0	1	1.3778e-25	1	1258	0.196422	0.159667	0	1	6.44565e-24	1	2.01555e-49	Monotone	TRUE	TRUE	FALSE	TRUE	TRUE	TRUE	FALSE	TRUE
orfnumATGs2	1267	0.149576	0.0849192	0.001	1	2.32309e-05	1	1074	0.143559	0.05881	0.0155644	1	0.0105175	0.999998	7.70556e-16	Monotone	TRUE	TRUE	FALSE	TRUE	TRUE	TRUE	FALSE	TRUE
orfnumATGs30C	1267	0.130281	0.0115967	0.077	0.499	0.075933	0.502848	930	0.140537	0.0125593	0.187	0.638	0.193809	0.648855	0.00061749	MIC not significant	FALSE	FALSE	FALSE	FALSE	FALSE	FALSE	FALSE	FALSE
orfnumATGs030C	1267	0.11132	0.00498744	0.805	0.928	0.797636	0.92491	298	0.144564	0.000635447	0.973	0.959	0.957377	0.944253	0.664725	MIC not significant	FALSE	FALSE	FALSE	FALSE	FALSE	FALSE	FALSE	FALSE
orfnumATGs130C	1267	0.128632	0.00474351	0.106	0.237	0.115681	0.247608	723	0.134932	0.000780914	0.612	0.593	0.631945	0.612405	0.453107	MIC not significant	FALSE	FALSE	FALSE	FALSE	FALSE	FALSE	FALSE	FALSE
orfnumATGs230C	1267	0.121517	0.00610663	0.168	0.411	0.163557	0.407498	195	0.201267	0.000344811	0.149	0.101	0.164075	0.103855	0.796671	MIC not significant	FALSE	FALSE	FALSE	FALSE	FALSE	FALSE	FALSE	FALSE
orfnumATGs200C	1267	0.118261	0.00177623	0.558	0.629	0.582659	0.634442	1266	0.118313	0.00194483	0.579	0.635	0.596356	0.65675	0.116802	MIC not significant	FALSE	FALSE	FALSE	FALSE	FALSE	FALSE	FALSE	FALSE
orfnumATGs0200C	1267	0.126123	0.00107599	0.18	0.192	0.193764	0.202349	1159	0.124531	0.000142176	0.384	0.357	0.409433	0.376267	0.685103	MIC not significant	FALSE	FALSE	FALSE	FALSE	FALSE	FALSE	FALSE	FALSE
orfnumATGs1200C	1267	0.126842	0.00239025	0.175	0.22	0.175312	0.234638	1256	0.127596	0.002886	0.188	0.282	0.194407	0.277674	0.0569917	MIC not significant	FALSE	FALSE	FALSE	FALSE	FALSE	FALSE	FALSE	FALSE
orfnumATGs2200C	1267	0.116529	0.00105	0.673	0.68	0.665408	0.67609	793	0.132013	0.00396833	0.73	0.809	0.734411	0.817016	0.0762436	MIC not significant	FALSE	FALSE	FALSE	FALSE	FALSE	FALSE	FALSE	FALSE
orfdistATG	1267	0.117569	0.0128499	0.63	0.979	0.629284	0.97014	1266	0.117712	0.0133224	0.621	0.984	0.626177	0.973777	3.84577e-05	MIC not significant	FALSE	FALSE	FALSE	FALSE	FALSE	FALSE	FALSE	FALSE
orfdistATG0	1267	0.116929	0.0024422	0.641	0.716	0.650624	0.725462	1216	0.123784	0.0115369	0.364	0.888	0.380377	0.869554	0.000175064	MIC not significant	FALSE	FALSE	FALSE	FALSE	FALSE	FALSE	FALSE	FALSE
orfdistATG1	1267	0.130588	0.00679001	0.074	0.252	0.0748578	0.269496	1258	0.132072	0.00822881	0.073	0.305	0.0662692	0.307005	0.00127802	MIC not significant	FALSE	FALSE	FALSE	FALSE	FALSE	FALSE	FALSE	FALSE
orfdistATG2	1267	0.128684	0.000379747	0.132	0.109	0.127942	0.115434	1074	0.137535	0.0367178	0.073	0.998	0.068138	0.996483	2.43309e-10	MIC not significant	FALSE	FALSE	FALSE	FALSE	FALSE	FALSE	FALSE	FALSE
orfLens	1267	0.288063	0.292638	0	1	2.27274e-120	1	1267	0.288063	0.292638	0	1	1.33093e-121	1	3.27404e-97	Monotone	TRUE	TRUE	FALSE	TRUE	TRUE	TRUE	FALSE	TRUE
orfuORFs	1267	0.193442	0.147808	0	1	6.92175e-23	1	1183	0.200064	0.195489	0	1	2.60489e-24	1	8.61502e-58	Monotone	TRUE	TRUE	FALSE	TRUE	TRUE	TRUE	FALSE	TRUE
orfmaxLenuORFs	1267	0.272738	0.212154	0	1	5.61136e-100	1	1183	0.289696	0.280004	0	1	1.77776e-116	1	2.4801e-86	Monotone	TRUE	TRUE	FALSE	TRUE	TRUE	TRUE	FALSE	TRUE
orfmeanLenuORFs	1267	0.264425	0.200037	0	1	5.0926e-103	1	1183	0.287763	0.264011	0	1	2.21776e-126	1	1.09985e-80	Monotone	TRUE	TRUE	FALSE	TRUE	TRUE	TRUE	FALSE	TRUE
orfmaxCostuORFs	1267	0.27862	0.207212	0	1	2.50152e-125	1	1183	0.295498	0.273503	0	1	3.68709e-138	1	5.06971e-84	Monotone	TRUE	TRUE	FALSE	TRUE	TRUE	TRUE	FALSE	TRUE
orfmeanCostuORFs	1267	0.25984	0.194168	0	1	1.01883e-96	1	1183	0.275176	0.256289	0	1	6.60087e-108	1	5.30421e-78	Monotone	TRUE	TRUE	FALSE	TRUE	TRUE	TRUE	FALSE	TRUE
orfuORFs30C	1267	0.130281	0.0115967	0.086	0.482	0.0766011	0.495973	930	0.140537	0.0125593	0.19	0.644	0.200478	0.651787	0.00061749	MIC not significant	FALSE	FALSE	FALSE	FALSE	FALSE	FALSE	FALSE	FALSE
orfmaxLenuORFs30C	1267	0.125904	0.000877226	0.229	0.23	0.239081	0.241998	930	0.143351	0.00131363	0.116	0.126	0.111894	0.118753	0.269518	MIC not significant	FALSE	FALSE	FALSE	FALSE	FALSE	FALSE	FALSE	FALSE
orfmeanLenuORFs30C	1267	0.129408	0.000429815	0.11	0.093	0.105385	0.0971148	930	0.135658	0.00278126	0.343	0.405	0.363914	0.435	0.108002	MIC not significant	FALSE	FALSE	FALSE	FALSE	FALSE	FALSE	FALSE	FALSE
orfmaxCostuORFs30C	1267	0.124072	0.000845438	0.338	0.346	0.350177	0.349971	930	0.149386	0.00137812	0.056	0.059	0.0529286	0.0586625	0.258069	MIC not significant	FALSE	FALSE	FALSE	FALSE	FALSE	FALSE	FALSE	FALSE
orfmeanCostuORFs30C	1267	0.132108	0.00041158	0.069	0.065	0.05317	0.0462581	930	0.13999	0.00285812	0.306	0.383	0.318615	0.399588	0.103244	MIC not significant	FALSE	FALSE	FALSE	FALSE	FALSE	FALSE	FALSE	FALSE
orfuORFs200C	1267	0.118646	0.000991255	0.554	0.571	0.570654	0.584028	1255	0.121672	0.00175245	0.457	0.504	0.465846	0.516344	0.138292	MIC not significant	FALSE	FALSE	FALSE	FALSE	FALSE	FALSE	FALSE	FALSE
orfmaxLenuORFs200C	1267	0.266283	0.233779	0	1	1.29283e-92	1	1255	0.266193	0.23324	0	1	2.0019e-90	1	2.55322e-74	Monotone	TRUE	TRUE	FALSE	TRUE	TRUE	TRUE	FALSE	TRUE
orfmeanLenuORFs200C	1267	0.261338	0.220037	0	1	4.43836e-98	1	1255	0.257776	0.219217	0	1	2.73097e-90	1	2.24593e-69	Monotone	TRUE	TRUE	FALSE	TRUE	TRUE	TRUE	FALSE	TRUE
orfmaxCostuORFs200C	1267	0.274063	0.228797	0	1	1.36791e-116	1	1255	0.272651	0.22817	0	1	5.00314e-111	1	1.60257e-72	Monotone	TRUE	TRUE	FALSE	TRUE	TRUE	TRUE	FALSE	TRUE
orfmeanCostuORFs200C	1267	0.252212	0.216343	0	1	2.48472e-86	1	1255	0.252097	0.215462	0	1	1.43257e-83	1	4.57739e-68	Monotone	TRUE	TRUE	FALSE	TRUE	TRUE	TRUE	FALSE	TRUE
orfuORFs0	1267	0.201672	0.190981	0	1	1.94147e-27	1	1216	0.197821	0.18018	0	1	1.52871e-23	1	2.27645e-54	Monotone	TRUE	TRUE	FALSE	TRUE	TRUE	TRUE	FALSE	TRUE
orfuORFs1	1267	0.195163	0.127274	0	1	8.14115e-24	1	1203	0.198362	0.161008	0	1	1.00808e-22	1	9.40242e-48	Monotone	TRUE	TRUE	FALSE	TRUE	TRUE	TRUE	FALSE	TRUE
orfuORFs2	1267	0.154638	0.0824609	3.94737e-05	1	2.04622e-06	1	1044	0.144873	0.0579348	0.0258416	1	0.0195284	0.999998	3.17023e-15	Monotone	TRUE	TRUE	FALSE	TRUE	TRUE	TRUE	FALSE	TRUE
orfmaxLenuORFs0	1267	0.285311	0.274366	0	1	3.08305e-117	1	1216	0.281155	0.269474	0	1	2.39895e-106	1	7.41666e-85	Monotone	TRUE	TRUE	FALSE	TRUE	TRUE	TRUE	FALSE	TRUE
orfmaxLenuORFs1	1267	0.154628	0.0742692	3.94737e-05	1	2.18603e-06	1	1203	0.163066	0.0945118	0	1	9.03051e-08	1	9.52938e-28	Monotone	TRUE	TRUE	FALSE	TRUE	TRUE	TRUE	FALSE	TRUE
orfmaxLenuORFs2	1267	0.137991	0.048211	0.018	1	0.00938602	0.999943	1044	0.125605	0.0195577	0.561	0.998	0.583301	0.990674	5.74558e-06	MIC not significant	FALSE	FALSE	FALSE	FALSE	TRUE	FALSE	FALSE	FALSE
orfmeanLenuORFs0	1267	0.27814	0.256734	0	1	1.92516e-122	1	1216	0.272319	0.250378	0	1	4.03187e-106	1	4.88156e-78	Monotone	TRUE	TRUE	FALSE	TRUE	TRUE	TRUE	FALSE	TRUE
orfmeanLenuORFs1	1267	0.135678	0.0194276	0.028	0.767	0.0182078	0.757187	1203	0.133057	0.0253627	0.099	0.992	0.103491	0.988796	2.80102e-08	MIC not significant	FALSE	FALSE	FALSE	FALSE	FALSE	FALSE	FALSE	FALSE
orfmeanLenuORFs2	1267	0.129134	0.0321794	0.11	1	0.116608	0.998948	1044	0.128143	0.00645988	0.407	0.68	0.433527	0.684824	0.00937588	MIC not significant	FALSE	FALSE	FALSE	FALSE	FALSE	FALSE	FALSE	FALSE
orfmaxCostuORFs0	1267	0.292042	0.267433	0	1	5.35614e-146	1	1216	0.285256	0.262002	0	1	2.13815e-125	1	3.62249e-82	Monotone	TRUE	TRUE	FALSE	TRUE	TRUE	TRUE	FALSE	TRUE
orfmaxCostuORFs1	1267	0.156706	0.0727928	0	1	1.16511e-07	1	1203	0.15879	0.0926782	4.9505e-05	1	4.6076e-07	1	3.24204e-27	Monotone	TRUE	TRUE	FALSE	TRUE	TRUE	TRUE	FALSE	TRUE
orfmaxCostuORFs2	1267	0.150161	0.0477055	0.001	0.999	1.87962e-05	0.993783	1044	0.143972	0.0192145	0.025	0.656	0.0218191	0.665138	6.95084e-06	non-significant monotone/non-monotone	TRUE	TRUE	FALSE	FALSE	TRUE	TRUE	FALSE	FALSE
orfmeanCostuORFs0	1267	0.279674	0.249298	0	1	1.19871e-125	1	1216	0.274174	0.242392	0	1	2.01201e-108	1	3.08454e-75	Monotone	TRUE	TRUE	FALSE	TRUE	TRUE	TRUE	FALSE	TRUE
orfmeanCostuORFs1	1267	0.134113	0.0185122	0.066	0.877	0.0533136	0.863316	1203	0.138264	0.0242057	0.044	0.956	0.041497	0.952307	5.83809e-08	MIC not significant	FALSE	FALSE	FALSE	FALSE	FALSE	FALSE	FALSE	FALSE
orfmeanCostuORFs2	1267	0.146277	0.0314912	0.00107895	0.796868	0.000142487	0.801047	1044	0.132436	0.0061234	0.385	0.624	0.393028	0.655626	0.0114305	MIC not significant	TRUE	FALSE	FALSE	FALSE	TRUE	FALSE	FALSE	FALSE
orfuORFs030C	1267	0.11132	0.00498744	0.783	0.93	0.797759	0.923929	298	0.144564	0.000635447	0.959	0.947	0.947699	0.933463	0.664725	MIC not significant	FALSE	FALSE	FALSE	FALSE	FALSE	FALSE	FALSE	FALSE
orfuORFs130C	1267	0.128632	0.00474351	0.134	0.254	0.123982	0.261042	723	0.134932	0.000780914	0.601	0.569	0.623991	0.597211	0.453107	MIC not significant	FALSE	FALSE	FALSE	FALSE	FALSE	FALSE	FALSE	FALSE
orfuORFs230C	1267	0.121517	0.00610663	0.172	0.395	0.186686	0.418886	195	0.201267	0.000344811	0.163	0.109	0.167491	0.112212	0.796671	MIC not significant	FALSE	FALSE	FALSE	FALSE	FALSE	FALSE	FALSE	FALSE
orfmaxLenuORFs030C	1267	0.118998	0.000937066	0.403	0.414	0.408031	0.41721	298	0.32898	0.317201	0	1	1.49967e-15	1	2.441e-26	MIC not significant	FALSE	TRUE	FALSE	FALSE	FALSE	TRUE	FALSE	FALSE
orfmaxLenuORFs130C	1267	0.128888	0.000952311	0.125	0.131	0.120187	0.123885	723	0.147559	0.0072993	0.208	0.396	0.217458	0.412771	0.0215911	MIC not significant	FALSE	FALSE	FALSE	FALSE	FALSE	FALSE	FALSE	FALSE
orfmaxLenuORFs230C	1267	0.121517	0.00619562	0.146	0.378	0.145534	0.383857	195	0.1548	0.00152037	0.955	0.942	0.942145	0.925737	0.588372	MIC not significant	FALSE	FALSE	FALSE	FALSE	FALSE	FALSE	FALSE	FALSE
orfmeanLenuORFs030C	1267	0.11575	0.000938405	0.566	0.57	0.586895	0.593693	298	0.32898	0.316856	0	1	2.05463e-15	1	2.63174e-26	MIC not significant	FALSE	TRUE	FALSE	FALSE	FALSE	TRUE	FALSE	FALSE
orfmeanLenuORFs130C	1267	0.128402	0.00051815	0.125	0.116	0.128376	0.11783	723	0.134163	0.011957	0.654	0.938	0.672121	0.927089	0.00324031	MIC not significant	FALSE	FALSE	FALSE	FALSE	FALSE	FALSE	FALSE	FALSE
orfmeanLenuORFs230C	1267	0.121517	0.00619967	0.166	0.419	0.172319	0.41076	195	0.1548	0.00152828	0.95	0.927	0.940487	0.922034	0.587402	MIC not significant	FALSE	FALSE	FALSE	FALSE	FALSE	FALSE	FALSE	FALSE
orfmaxCostuORFs030C	1267	0.111767	0.000965926	0.752	0.753	0.768895	0.775818	298	0.330944	0.309547	0	1	1.98752e-15	1	0	MIC not significant	FALSE	TRUE	FALSE	FALSE	FALSE	TRUE	FALSE	FALSE
orfmaxCostuORFs130C	1267	0.122881	0.00102255	0.349	0.358	0.37704	0.39005	723	0.14379	0.00670341	0.418	0.628	0.445129	0.653815	0.0277092	MIC not significant	FALSE	FALSE	FALSE	FALSE	FALSE	FALSE	FALSE	FALSE
orfmaxCostuORFs230C	1267	0.121517	0.00615988	0.176	0.403	0.172618	0.405815	195	0.179156	0.00106637	0.888	0.827	0.870152	0.826906	0.650407	MIC not significant	FALSE	FALSE	FALSE	FALSE	FALSE	FALSE	FALSE	FALSE
orfmeanCostuORFs030C	1267	0.117086	0.000968481	0.508	0.511	0.500043	0.507196	298	0.334419	0.308913	0	1	5.02491e-16	1	0	MIC not significant	FALSE	TRUE	FALSE	FALSE	FALSE	TRUE	FALSE	FALSE
orfmeanCostuORFs130C	1267	0.124462	0.000586383	0.262	0.252	0.287537	0.278464	723	0.142849	0.0109786	0.484	0.833	0.510859	0.844078	0.00479857	MIC not significant	FALSE	FALSE	FALSE	FALSE	FALSE	FALSE	FALSE	FALSE
orfmeanCostuORFs230C	1267	0.121517	0.00616159	0.179	0.383	0.17567	0.410101	195	0.178887	0.00106162	0.864	0.82	0.862315	0.823831	0.651135	MIC not significant	FALSE	FALSE	FALSE	FALSE	FALSE	FALSE	FALSE	FALSE
orfuORFs0200C	1267	0.126123	0.00107599	0.185	0.19	0.204879	0.216675	1159	0.124531	0.000142176	0.395	0.35	0.409798	0.374022	0.685103	MIC not significant	FALSE	FALSE	FALSE	FALSE	FALSE	FALSE	FALSE	FALSE
orfuORFs1200C	1267	0.128522	0.00193301	0.142	0.179	0.138731	0.174385	1248	0.129599	0.00305144	0.173	0.247	0.169205	0.250289	0.0510577	MIC not significant	FALSE	FALSE	FALSE	FALSE	FALSE	FALSE	FALSE	FALSE
orfuORFs2200C	1267	0.115972	0.000952751	0.677	0.685	0.691188	0.697912	790	0.131811	0.00420457	0.734	0.828	0.738082	0.824218	0.0685219	MIC not significant	FALSE	FALSE	FALSE	FALSE	FALSE	FALSE	FALSE	FALSE
orfmaxLenuORFs0200C	1267	0.270139	0.228352	0	1	2.15748e-95	1	1159	0.287634	0.27533	0	1	2.5125e-105	1	5.49943e-83	Monotone	TRUE	TRUE	FALSE	TRUE	TRUE	TRUE	FALSE	TRUE
orfmaxLenuORFs1200C	1267	0.120885	0.0139085	0.477	0.955	0.467142	0.955639	1248	0.118809	0.0125741	0.64	0.979	0.648647	0.974113	7.18915e-05	MIC not significant	FALSE	FALSE	FALSE	FALSE	FALSE	FALSE	FALSE	FALSE
orfmaxLenuORFs2200C	1267	0.123985	1.70549e-06	0.278	0.249	0.296683	0.262022	790	0.151079	0.000367886	0.114	0.1	0.117208	0.100491	0.590372	MIC not significant	FALSE	FALSE	FALSE	FALSE	FALSE	FALSE	FALSE	FALSE
orfmeanLenuORFs0200C	1267	0.277212	0.234808	0	1	7.21604e-119	1	1159	0.292321	0.28384	0	1	4.91178e-124	1	5.83255e-86	Monotone	TRUE	TRUE	FALSE	TRUE	TRUE	TRUE	FALSE	TRUE
orfmeanLenuORFs1200C	1267	0.131564	0.0174279	0.064	0.727	0.0576504	0.749403	1248	0.134802	0.0160537	0.046	0.601	0.0431691	0.605751	7.13335e-06	MIC not significant	FALSE	FALSE	FALSE	FALSE	FALSE	FALSE	FALSE	FALSE
orfmeanLenuORFs2200C	1267	0.12719	0.000183846	0.179	0.166	0.177477	0.156276	790	0.124927	0.00246746	0.905	0.926	0.904024	0.925405	0.16307	MIC not significant	FALSE	FALSE	FALSE	FALSE	FALSE	FALSE	FALSE	FALSE
orfmaxCostuORFs0200C	1267	0.279228	0.223019	0	1	7.88916e-126	1	1159	0.290747	0.268319	0	1	3.60277e-122	1	1.46195e-80	Monotone	TRUE	TRUE	FALSE	TRUE	TRUE	TRUE	FALSE	TRUE
orfmaxCostuORFs1200C	1267	0.118926	0.0121289	0.677	0.985	0.688989	0.984307	1248	0.118988	0.0108343	0.744	0.994	0.768862	0.986782	0.000230105	MIC not significant	FALSE	FALSE	FALSE	FALSE	FALSE	FALSE	FALSE	FALSE
orfmaxCostuORFs2200C	1267	0.126268	7.27787e-06	0.187	0.162	0.182675	0.158182	790	0.137591	8.63367e-05	0.579	0.521	0.603963	0.550227	0.794282	MIC not significant	FALSE	FALSE	FALSE	FALSE	FALSE	FALSE	FALSE	FALSE
orfmeanCostuORFs0200C	1267	0.294158	0.230343	0	1	4.20821e-150	1	1159	0.310178	0.277966	0	1	1.7608e-152	1	6.64799e-84	Monotone	TRUE	TRUE	FALSE	TRUE	TRUE	TRUE	FALSE	TRUE
orfmeanCostuORFs1200C	1267	0.125911	0.015656	0.375	0.979	0.39961	0.974638	1248	0.129282	0.014305	0.273	0.946	0.294399	0.933019	2.27318e-05	MIC not significant	FALSE	FALSE	FALSE	FALSE	FALSE	FALSE	FALSE	FALSE
orfmeanCostuORFs2200C	1267	0.118883	0.000115341	0.574	0.533	0.592844	0.55942	790	0.145952	0.00182483	0.294	0.305	0.303466	0.32508	0.230403	MIC not significant	FALSE	FALSE	FALSE	FALSE	FALSE	FALSE	FALSE	FALSE
rorf5bestATG	1263	0.128828	0.0142254	0.232	0.937	0.26472	0.920356	1263	0.128828	0.0142254	0.237	0.899	0.243815	0.903722	2.1699e-05	MIC not significant	FALSE	FALSE	FALSE	FALSE	FALSE	FALSE	FALSE	FALSE
rorfMeanATG	1263	0.129235	0.00254993	0.234	0.319	0.23929	0.330149	1263	0.129235	0.00254993	0.241	0.333	0.249226	0.339392	0.0728226	MIC not significant	FALSE	FALSE	FALSE	FALSE	FALSE	FALSE	FALSE	FALSE
rorf5bestATG30C	1263	0.129786	0.00466723	0.2	0.394	0.204011	0.411619	1261	0.128059	0.00464117	0.302	0.525	0.316416	0.539758	0.0155372	MIC not significant	FALSE	FALSE	FALSE	FALSE	FALSE	FALSE	FALSE	FALSE
rorfMeanATG30C	1263	0.127269	0.00401639	0.338	0.529	0.353317	0.546567	1261	0.126534	0.0039904	0.389	0.574	0.398311	0.592268	0.0248836	MIC not significant	FALSE	FALSE	FALSE	FALSE	FALSE	FALSE	FALSE	FALSE
rorf5bestATG200C	1263	0.125409	3.05609e-05	0.449	0.391	0.447577	0.396765	1263	0.125409	3.05609e-05	0.398	0.356	0.426943	0.384434	0.844397	MIC not significant	FALSE	FALSE	FALSE	FALSE	FALSE	FALSE	FALSE	FALSE
rorfMeanATG200C	1263	0.130841	8.27026e-05	0.174	0.154	0.177322	0.150818	1263	0.130841	8.27026e-05	0.16	0.145	0.1659	0.141304	0.746753	MIC not significant	FALSE	FALSE	FALSE	FALSE	FALSE	FALSE	FALSE	FALSE
rorfbestATG0	1263	0.137065	0.0356738	0.033	1	0.026586	0.999751	1262	0.136647	0.0349535	0.0443026	0.999961	0.0349095	0.999657	2.16908e-11	Monotone	FALSE	FALSE	FALSE	FALSE	FALSE	TRUE	FALSE	FALSE
rorfMeanATG0	1263	0.127899	0.0172089	0.287	0.988	0.324472	0.979142	1262	0.128018	0.0166744	0.315	0.989	0.329832	0.977057	4.18422e-06	MIC not significant	FALSE	FALSE	FALSE	FALSE	FALSE	FALSE	FALSE	FALSE
rorfbestATG1	1263	0.134653	0.0117943	0.082	0.528	0.0651911	0.553225	1263	0.134653	0.0117943	0.084	0.555	0.0717119	0.575827	0.000111095	MIC not significant	FALSE	FALSE	FALSE	FALSE	FALSE	FALSE	FALSE	FALSE
rorfMeanATG1	1263	0.123113	0.00186771	0.571	0.647	0.612106	0.670862	1263	0.123113	0.00186771	0.582	0.646	0.602815	0.663469	0.124755	MIC not significant	FALSE	FALSE	FALSE	FALSE	FALSE	FALSE	FALSE	FALSE
rorfbestATG2	1263	0.145554	0.0264718	0.003	0.731	0.000645985	0.739705	1262	0.144255	0.026082	0.006	0.805	0.00119371	0.810075	7.95395e-09	non-significant monotone/non-monotone	TRUE	TRUE	FALSE	FALSE	TRUE	TRUE	FALSE	FALSE
rorfMeanATG2	1263	0.150826	0.0192127	0.000394737	0.120026	3.25032e-05	0.117828	1262	0.15012	0.0188699	0.001	0.125	3.45363e-05	0.126444	9.66515e-07	non-significant monotone/non-monotone	TRUE	TRUE	FALSE	FALSE	TRUE	TRUE	FALSE	FALSE
rorfbestATG030C	1263	0.126563	0.00114816	0.34	0.362	0.356737	0.380325	1262	0.125072	0.00125484	0.437	0.47	0.461401	0.492053	0.208549	MIC not significant	FALSE	FALSE	FALSE	FALSE	FALSE	FALSE	FALSE	FALSE
rorfMeanATG030C	1263	0.125054	0.00115229	0.428	0.446	0.451558	0.469094	1262	0.123864	0.00125916	0.518	0.542	0.532942	0.562181	0.207769	MIC not significant	FALSE	FALSE	FALSE	FALSE	FALSE	FALSE	FALSE	FALSE
rorfbestATG130C	1263	0.129414	0.00435915	0.209	0.406	0.22162	0.414119	1261	0.130508	0.00433421	0.191	0.341	0.190508	0.366739	0.0193849	MIC not significant	FALSE	FALSE	FALSE	FALSE	FALSE	FALSE	FALSE	FALSE
rorfMeanATG130C	1263	0.132752	0.00426725	0.104	0.223	0.10162	0.231545	1261	0.131442	0.00424234	0.142	0.272	0.150509	0.303035	0.0207182	MIC not significant	FALSE	FALSE	FALSE	FALSE	FALSE	FALSE	FALSE	FALSE
rorfbestATG230C	1263	0.135946	0.00166738	0.048	0.054	0.0392208	0.0498984	1262	0.136042	0.00179536	0.037	0.05	0.0325277	0.0453791	0.132472	non-significant monotone/non-monotone	FALSE	FALSE	FALSE	FALSE	FALSE	TRUE	FALSE	FALSE
rorfMeanATG230C	1263	0.135946	0.00166634	0.044	0.051	0.0281311	0.0363415	1262	0.136042	0.00179428	0.046	0.055	0.0378749	0.05208	0.132589	non-significant monotone/non-monotone	FALSE	FALSE	FALSE	FALSE	FALSE	FALSE	FALSE	FALSE
rorfbestATG0200C	1263	0.133475	0.00176365	0.097	0.119	0.0950633	0.122864	1262	0.132872	0.00157839	0.106	0.133	0.109991	0.13513	0.158388	MIC not significant	FALSE	FALSE	FALSE	FALSE	FALSE	FALSE	FALSE	FALSE
rorfMeanATG0200C	1263	0.1367	0.00217962	0.036	0.049	0.0269614	0.0428643	1262	0.136859	0.00197413	0.038	0.068	0.0339013	0.050611	0.114654	non-significant monotone/non-monotone	FALSE	FALSE	FALSE	FALSE	FALSE	TRUE	FALSE	FALSE
rorfbestATG1200C	1263	0.125261	8.31379e-05	0.414	0.375	0.433101	0.386239	1263	0.125261	8.31379e-05	0.436	0.397	0.475394	0.427932	0.74611	MIC not significant	FALSE	FALSE	FALSE	FALSE	FALSE	FALSE	FALSE	FALSE
rorfMeanATG1200C	1263	0.122374	9.65082e-05	0.608	0.57	0.632294	0.593961	1263	0.122374	9.65082e-05	0.605	0.564	0.62427	0.585613	0.727211	MIC not significant	FALSE	FALSE	FALSE	FALSE	FALSE	FALSE	FALSE	FALSE
rorfbestATG2200C	1263	0.130314	0.000445869	0.205	0.192	0.203941	0.189808	1262	0.13031	0.000511295	0.206	0.192	0.197155	0.182598	0.422215	MIC not significant	FALSE	FALSE	FALSE	FALSE	FALSE	FALSE	FALSE	FALSE
rorfMeanATG2200C	1263	0.123551	0.000397065	0.555	0.533	0.580641	0.558228	1262	0.123612	0.000458818	0.547	0.51	0.561657	0.541576	0.447092	MIC not significant	FALSE	FALSE	FALSE	FALSE	FALSE	FALSE	FALSE	FALSE
orftAI	1267	0.192872	0.0782046	0	0.92297	7.16871e-26	0.91288	1267	0.192872	0.0782046	0	0.922861	5.99346e-26	0.91257	3.13058e-24	non-significant monotone/non-monotone	TRUE	TRUE	FALSE	FALSE	TRUE	TRUE	FALSE	FALSE
orfCAI	1267	0.191836	0.0877685	0	0.999762	1.92914e-25	0.998626	1267	0.191836	0.0877685	0	0.999832	2.54991e-25	0.998555	0	Monotone	TRUE	TRUE	FALSE	TRUE	TRUE	TRUE	FALSE	TRUE
scATGcs	1263	0.127984	0.000212884	0.231	0.201	0.247367	0.21559	1263	0.127984	0.000212884	0.261	0.239	0.270956	0.24174	0.604428	MIC not significant	FALSE	FALSE	FALSE	FALSE	FALSE	FALSE	FALSE	FALSE
TASEPCsct	1267	0.226978	0.157103	0	1	9.00876e-56	1	1267	0.226978	0.157103	0	1	8.23755e-56	1	6.35924e-49	Monotone	TRUE	TRUE	FALSE	TRUE	TRUE	TRUE	FALSE	TRUE
orf_PARS_numBP_all	1066	0.168819	0.0769671	2.63158e-05	1	3.70947e-08	1	1066	0.168819	0.0769671	9.90099e-06	1	3.55543e-08	1	2.72901e-20	Monotone	TRUE	TRUE	FALSE	TRUE	TRUE	TRUE	FALSE	TRUE
orfdn	758	0.159406	0.0286071	0.062	0.912	0.0500625	0.891358	757	0.158326	0.0299053	0.068	0.965	0.0652814	0.950462	1.76435e-06	MIC not significant	FALSE	FALSE	FALSE	FALSE	FALSE	FALSE	FALSE	FALSE
orfdsAdj	758	0.139071	0.00622537	0.696	0.862	0.707789	0.861552	758	0.139071	0.00622537	0.704	0.869	0.721848	0.869011	0.029849	MIC not significant	FALSE	FALSE	FALSE	FALSE	FALSE	FALSE	FALSE	FALSE
orfdn_dsAdj	758	0.163957	0.0348187	0.026	0.935	0.0184819	0.926848	757	0.166591	0.0362686	0.015	0.921	0.00981515	0.910983	1.37039e-07	non-significant monotone/non-monotone	FALSE	TRUE	FALSE	FALSE	FALSE	TRUE	FALSE	FALSE
utr3gc	1267	0.122693	0.00404594	0.392	0.564	0.398321	0.583089	1266	0.122724	0.00403078	0.362	0.544	0.390527	0.576447	0.0238821	MIC not significant	FALSE	FALSE	FALSE	FALSE	FALSE	FALSE	FALSE	FALSE
utr3gc40	1267	0.115281	0.000413635	0.708	0.701	0.723919	0.707549	1266	0.115143	0.000405685	0.725	0.702	0.720722	0.702836	0.473978	MIC not significant	FALSE	FALSE	FALSE	FALSE	FALSE	FALSE	FALSE	FALSE
utr3meanFE	1197	0.151165	0.0252513	0.001	0.472	0.000234491	0.505147	1197	0.151165	0.0252513	0.001	0.514	0.000173736	0.533598	3.25366e-08	non-significant monotone/non-monotone	TRUE	TRUE	FALSE	FALSE	TRUE	TRUE	FALSE	FALSE
utr3meanFE40	1197	0.137347	0.00889041	0.038	0.201	0.0290631	0.20587	1197	0.137347	0.00889041	0.039	0.198	0.0294758	0.199483	0.00109058	non-significant monotone/non-monotone	FALSE	FALSE	FALSE	FALSE	FALSE	TRUE	FALSE	FALSE
utr3bestATG	1267	0.125376	0.000180049	0.283	0.251	0.306249	0.273727	1037	0.140131	7.26519e-05	0.139	0.124	0.13921	0.11852	0.783965	MIC not significant	FALSE	FALSE	FALSE	FALSE	FALSE	FALSE	FALSE	FALSE
utr3MeanATG	1267	0.137188	0.000120964	0.018	0.015	0.0123888	0.0091792	1037	0.156112	2.52939e-05	0.004	0.003	0.00160613	0.00109763	0.871493	Non-monotone	FALSE	TRUE	FALSE	FALSE	TRUE	TRUE	FALSE	FALSE
utr3bestATG0	1267	0.11059	0.000735422	0.927	0.927	0.916219	0.915064	640	0.158524	5.92076e-05	0.3	0.26	0.321926	0.274903	0.845954	MIC not significant	FALSE	FALSE	FALSE	FALSE	FALSE	FALSE	FALSE	FALSE
utr3MeanATG0	1267	0.11059	0.00071048	0.925	0.924	0.913236	0.911108	640	0.143915	3.67459e-05	0.837	0.815	0.849216	0.815794	0.878355	MIC not significant	FALSE	FALSE	FALSE	FALSE	FALSE	FALSE	FALSE	FALSE
utr3bestATG1	1267	0.123421	0.000343165	0.305	0.294	0.324459	0.303849	593	0.142433	0.00201913	0.944	0.949	0.929555	0.934214	0.274625	MIC not significant	FALSE	FALSE	FALSE	FALSE	FALSE	FALSE	FALSE	FALSE
utr3MeanATG1	1267	0.123421	0.00029488	0.334	0.305	0.330964	0.305913	593	0.138608	0.00258019	0.982	0.989	0.963805	0.971446	0.216778	MIC not significant	FALSE	FALSE	FALSE	FALSE	FALSE	FALSE	FALSE	FALSE
utr3bestATG2	1267	0.125655	8.51081e-05	0.227	0.192	0.222624	0.192164	635	0.150536	0.00259029	0.644	0.68	0.654696	0.691456	0.200259	MIC not significant	FALSE	FALSE	FALSE	FALSE	FALSE	FALSE	FALSE	FALSE
utr3MeanATG2	1267	0.125655	9.12808e-05	0.24	0.21	0.259459	0.2249	635	0.159473	0.00268126	0.362	0.388	0.382199	0.417894	0.192526	MIC not significant	FALSE	FALSE	FALSE	FALSE	FALSE	FALSE	FALSE	FALSE
utr3numATGs	1267	0.117842	6.44574e-06	0.612	0.573	0.619478	0.577331	1037	0.126614	0.000238068	0.551	0.504	0.567778	0.533491	0.619685	MIC not significant	FALSE	FALSE	FALSE	FALSE	FALSE	FALSE	FALSE	FALSE
utr3numATGs0	1267	0.111589	0.000591142	0.871	0.867	0.871534	0.866945	640	0.138546	2.15288e-05	0.756	0.709	0.760556	0.717409	0.906739	MIC not significant	FALSE	FALSE	FALSE	FALSE	FALSE	FALSE	FALSE	FALSE
utr3numATGs1	1267	0.123421	0.00111062	0.327	0.333	0.340955	0.354222	593	0.150827	0.00031345	0.517	0.462	0.504223	0.456271	0.667009	MIC not significant	FALSE	FALSE	FALSE	FALSE	FALSE	FALSE	FALSE	FALSE
utr3numATGs2	1267	0.124506	7.87051e-06	0.261	0.229	0.282683	0.247794	635	0.15388	0.00112627	0.349	0.346	0.366196	0.354078	0.398526	MIC not significant	FALSE	FALSE	FALSE	FALSE	FALSE	FALSE	FALSE	FALSE
utr3distATG	1267	0.278401	0.140079	0	0.00925743	3.7124e-117	0.0045695	1037	0.331122	0.313998	0	1	3.67248e-153	1	8.77497e-87	Monotone	TRUE	TRUE	FALSE	TRUE	TRUE	TRUE	FALSE	TRUE
utr3distATG0	1267	0.185651	0.0171426	0	0	9.24295e-19	2.0566e-11	640	0.324479	0.313225	0	1	8.75224e-59	1	4.94014e-54	Monotone	TRUE	TRUE	FALSE	TRUE	TRUE	TRUE	FALSE	TRUE
utr3distATG1	1267	0.181799	0.0273425	0	9.90099e-06	1.16518e-16	1.3789e-06	593	0.339194	0.319547	0	1	1.71694e-59	1	2.25915e-51	Monotone	TRUE	TRUE	FALSE	TRUE	TRUE	TRUE	FALSE	TRUE
utr3distATG2	1267	0.185476	0.021357	0	0	1.5267e-18	1.08695e-09	635	0.325471	0.303743	0	1	2.30662e-58	1	9.88224e-52	Monotone	TRUE	TRUE	FALSE	TRUE	TRUE	TRUE	FALSE	TRUE
utr3Lens	1267	0.119112	0.00433466	0.572	0.752	0.580783	0.754855	1266	0.119174	0.00437646	0.532	0.714	0.555146	0.725519	0.0185676	MIC not significant	FALSE	FALSE	FALSE	FALSE	FALSE	FALSE	FALSE	FALSE
utr3uORFs	1267	0.131521	1.78377e-08	0.061	0.055	0.0563461	0.0449949	475	0.16659	0.000973975	0.355	0.325	0.356187	0.329175	0.497424	MIC not significant	FALSE	FALSE	FALSE	FALSE	FALSE	FALSE	FALSE	FALSE
u3maxLenuORFs	1267	0.131521	9.22359e-06	0.049	0.042	0.0436304	0.0342144	475	0.14823	0.000122494	0.82	0.776	0.818303	0.780408	0.809876	MIC not significant	FALSE	FALSE	FALSE	FALSE	FALSE	FALSE	FALSE	FALSE
u3meanLenuORFs	1267	0.131521	2.31844e-05	0.053	0.045	0.0439132	0.0348588	475	0.157302	1.38177e-08	0.588	0.527	0.607549	0.550146	0.997961	MIC not significant	FALSE	FALSE	FALSE	FALSE	FALSE	FALSE	FALSE	FALSE
u3maxCostuORFs	1267	0.131521	2.61417e-05	0.054	0.05	0.044584	0.0351027	475	0.139705	1.76565e-06	0.994	0.988	0.976472	0.96553	0.976957	MIC not significant	FALSE	FALSE	FALSE	FALSE	FALSE	FALSE	FALSE	FALSE
u3meanCostuORFs	1267	0.131521	4.24821e-05	0.061	0.053	0.0607917	0.0490036	475	0.16925	0.000102513	0.386	0.318	0.408391	0.350312	0.825801	MIC not significant	FALSE	FALSE	FALSE	FALSE	FALSE	FALSE	FALSE	FALSE
utr3uORFs0	1267	0.115088	0.000341153	0.686	0.663	0.686614	0.661648	406	0.154317	0.000401661	0.765	0.715	0.773154	0.732902	0.687228	MIC not significant	FALSE	FALSE	FALSE	FALSE	FALSE	FALSE	FALSE	FALSE
utr3uORFs1	1267	0.127899	0.0028592	0.107	0.156	0.101493	0.154965	373	0.16739	0.00566941	0.491	0.579	0.523329	0.596971	0.146675	MIC not significant	FALSE	FALSE	FALSE	FALSE	FALSE	FALSE	FALSE	FALSE
utr3uORFs2	1267	0.124821	1.77497e-05	0.225	0.204	0.22434	0.194957	419	0.161196	0.00116569	0.475	0.441	0.503705	0.469437	0.485809	MIC not significant	FALSE	FALSE	FALSE	FALSE	FALSE	FALSE	FALSE	FALSE
u3maxLenuORFs0	1267	0.115088	0.000402128	0.703	0.689	0.698132	0.683012	406	0.141603	1.49694e-05	0.958	0.941	0.948554	0.930787	0.938052	MIC not significant	FALSE	FALSE	FALSE	FALSE	FALSE	FALSE	FALSE	FALSE
u3maxLenuORFs1	1267	0.127899	0.00138372	0.097	0.114	0.0972193	0.10953	373	0.172353	0.00704392	0.419	0.505	0.444007	0.544073	0.10559	MIC not significant	FALSE	FALSE	FALSE	FALSE	FALSE	FALSE	FALSE	FALSE
u3maxLenuORFs2	1267	0.124821	0.000132062	0.21	0.189	0.224583	0.198428	419	0.17414	0.000645346	0.206	0.173	0.222065	0.184228	0.604088	MIC not significant	FALSE	FALSE	FALSE	FALSE	FALSE	FALSE	FALSE	FALSE
u3meanLenuORFs0	1267	0.115088	0.000413156	0.694	0.687	0.704498	0.689806	406	0.156173	2.08156e-06	0.726	0.665	0.743016	0.687441	0.97688	MIC not significant	FALSE	FALSE	FALSE	FALSE	FALSE	FALSE	FALSE	FALSE
u3meanLenuORFs1	1267	0.127899	0.00124333	0.097	0.112	0.0984768	0.108562	373	0.18529	0.0102054	0.189	0.321	0.182842	0.324548	0.0512357	MIC not significant	FALSE	FALSE	FALSE	FALSE	FALSE	FALSE	FALSE	FALSE
u3meanLenuORFs2	1267	0.124821	0.000174868	0.197	0.175	0.209939	0.187271	419	0.154994	0.0014635	0.71	0.69	0.705538	0.685339	0.43479	MIC not significant	FALSE	FALSE	FALSE	FALSE	FALSE	FALSE	FALSE	FALSE
u3maxCostuORFs0	1267	0.115088	0.000450482	0.7	0.675	0.702348	0.686857	406	0.177764	2.97301e-05	0.325	0.261	0.347468	0.279939	0.912784	MIC not significant	FALSE	FALSE	FALSE	FALSE	FALSE	FALSE	FALSE	FALSE
u3maxCostuORFs1	1267	0.127899	0.00134084	0.107	0.124	0.101462	0.114831	373	0.168518	0.0078841	0.671	0.786	0.669271	0.783342	0.0868053	MIC not significant	FALSE	FALSE	FALSE	FALSE	FALSE	FALSE	FALSE	FALSE
u3maxCostuORFs2	1267	0.124821	0.000169859	0.185	0.165	0.201574	0.176819	419	0.16537	0.00131131	0.554	0.525	0.569422	0.539599	0.459743	MIC not significant	FALSE	FALSE	FALSE	FALSE	FALSE	FALSE	FALSE	FALSE
u3meanCostuORFs0	1267	0.115088	0.000457571	0.686	0.681	0.698589	0.684373	406	0.157583	5.05872e-05	0.826	0.764	0.824977	0.779728	0.886391	MIC not significant	FALSE	FALSE	FALSE	FALSE	FALSE	FALSE	FALSE	FALSE
u3meanCostuORFs1	1267	0.127899	0.00115502	0.102	0.113	0.102505	0.111559	373	0.184528	0.0125743	0.25	0.504	0.282491	0.52888	0.0303684	MIC not significant	FALSE	FALSE	FALSE	FALSE	FALSE	FALSE	FALSE	FALSE
u3meanCostuORFs2	1267	0.124821	0.000216621	0.209	0.184	0.217493	0.194711	419	0.140906	0.00236808	0.988	0.988	0.972917	0.972085	0.32036	MIC not significant	FALSE	FALSE	FALSE	FALSE	FALSE	FALSE	FALSE	FALSE
rutr3bestATG	1263	0.128252	0.000335438	0.258	0.235	0.274936	0.253127	1262	0.128015	0.000346478	0.333	0.305	0.336991	0.311364	0.508833	MIC not significant	FALSE	FALSE	FALSE	FALSE	FALSE	FALSE	FALSE	FALSE
rutr3MeanATG	1263	0.122272	0.00025691	0.591	0.559	0.619784	0.589507	1262	0.122224	0.000266561	0.65	0.608	0.66104	0.631701	0.562277	MIC not significant	FALSE	FALSE	FALSE	FALSE	FALSE	FALSE	FALSE	FALSE
rutr3bestATG0	1263	0.122289	0.00118004	0.607	0.618	0.61627	0.636027	1262	0.122296	0.0012017	0.599	0.621	0.625415	0.651626	0.218461	MIC not significant	FALSE	FALSE	FALSE	FALSE	FALSE	FALSE	FALSE	FALSE
rutr3MeanATG0	1263	0.12342	0.00117464	0.554	0.572	0.563869	0.583652	1262	0.123429	0.00119622	0.55	0.583	0.570019	0.599272	0.219515	MIC not significant	FALSE	FALSE	FALSE	FALSE	FALSE	FALSE	FALSE	FALSE
rutr3bestATG1	1263	0.123132	1.57482e-05	0.553	0.517	0.577564	0.533347	1262	0.123618	2.94939e-05	0.535	0.499	0.561238	0.517439	0.847164	MIC not significant	FALSE	FALSE	FALSE	FALSE	FALSE	FALSE	FALSE	FALSE
rutr3MeanATG1	1263	0.128735	1.3059e-05	0.23	0.204	0.243884	0.211895	1262	0.129208	2.5773e-05	0.23	0.205	0.2342	0.200439	0.857018	MIC not significant	FALSE	FALSE	FALSE	FALSE	FALSE	FALSE	FALSE	FALSE
rutr3bestATG2	1263	0.12369	0.000110681	0.513	0.469	0.530653	0.486838	1262	0.122536	8.24798e-05	0.61	0.577	0.627042	0.589444	0.747213	MIC not significant	FALSE	FALSE	FALSE	FALSE	FALSE	FALSE	FALSE	FALSE
rutr3MeanATG2	1263	0.123461	0.000110942	0.532	0.489	0.544954	0.504165	1262	0.123521	8.2709e-05	0.544	0.503	0.564786	0.521938	0.746874	MIC not significant	FALSE	FALSE	FALSE	FALSE	FALSE	FALSE	FALSE	FALSE
utr3_PARS_numBP_all	1065	0.123656	0.0013951	0.602	0.624	0.625089	0.647223	873	0.142828	0.00198763	0.26	0.298	0.284881	0.315818	0.188161	MIC not significant	FALSE	FALSE	FALSE	FALSE	FALSE	FALSE	FALSE	FALSE
utr5MeanPARS	1066	0.145495	0.0116196	0.029	0.228	0.0157308	0.241248	1066	0.145495	0.0116196	0.026	0.253	0.0189418	0.257188	0.000422525	non-significant monotone/non-monotone	FALSE	TRUE	FALSE	FALSE	FALSE	TRUE	FALSE	FALSE
orfMeanPARS	1066	0.175265	0.100674	0	1	2.38626e-10	1	1066	0.175265	0.100674	0	1	3.10415e-10	1	0	Monotone	TRUE	TRUE	FALSE	TRUE	TRUE	TRUE	FALSE	TRUE
utr3MeanPARS	1065	0.145743	0.00977909	0.027	0.161	0.0145049	0.156838	1065	0.145743	0.00977909	0.02	0.158	0.0160334	0.166897	0.0012322	non-significant monotone/non-monotone	FALSE	TRUE	FALSE	FALSE	FALSE	TRUE	FALSE	FALSE
seqMeanPARS	1066	0.219572	0.150945	0	1	1.0778e-34	1	1066	0.219572	0.150945	0	1	1.77746e-34	1	0	Monotone	TRUE	TRUE	FALSE	TRUE	TRUE	TRUE	FALSE	TRUE
wutr5MeanPARS	1066	0.135055	0.00924961	0.227	0.655	0.237846	0.666806	1066	0.135055	0.00924961	0.227	0.646	0.235009	0.660174	0.00166836	MIC not significant	FALSE	FALSE	FALSE	FALSE	FALSE	FALSE	FALSE	FALSE
worfMeanPARS	1066	0.140569	0.0123491	0.092	0.528	0.0848116	0.551086	1066	0.140569	0.0123491	0.094	0.514	0.0769953	0.540273	0.000279971	MIC not significant	FALSE	FALSE	FALSE	FALSE	FALSE	FALSE	FALSE	FALSE
wutr3MeanPARS	1065	0.13423	0.00175215	0.259	0.279	0.276979	0.313632	1065	0.13423	0.00175215	0.261	0.281	0.264233	0.302464	0.172245	MIC not significant	FALSE	FALSE	FALSE	FALSE	FALSE	FALSE	FALSE	FALSE
wseqMeanPARS	1066	0.14323	0.0199499	0.045	0.787	0.0315043	0.790295	1066	0.14323	0.0199499	0.052	0.773	0.0360049	0.780914	3.75328e-06	MIC not significant	FALSE	FALSE	FALSE	FALSE	FALSE	FALSE	FALSE	FALSE
pars40	1066	0.129895	0.00688834	0.461	0.781	0.490134	0.784126	1066	0.129895	0.00688834	0.458	0.767	0.485303	0.778513	0.00670218	MIC not significant	FALSE	FALSE	FALSE	FALSE	FALSE	FALSE	FALSE	FALSE
u540pars	1066	0.143995	0.0100325	0.032	0.244	0.0251925	0.243345	1066	0.143995	0.0100325	0.042	0.269	0.0347239	0.270098	0.00105783	non-significant monotone/non-monotone	FALSE	FALSE	FALSE	FALSE	FALSE	TRUE	FALSE	FALSE
u540pars40	1066	0.138428	0.0174895	0.134	0.891	0.133686	0.883295	1066	0.138428	0.0174895	0.104	0.851	0.109584	0.851538	1.47882e-05	MIC not significant	FALSE	FALSE	FALSE	FALSE	FALSE	FALSE	FALSE	FALSE
u5pars40	1066	0.140593	0.0141185	0.07	0.599	0.0651192	0.624738	1066	0.140593	0.0141185	0.067	0.631	0.068286	0.634288	0.000100781	MIC not significant	FALSE	FALSE	FALSE	FALSE	FALSE	FALSE	FALSE	FALSE
u5parsOrf	1066	0.182541	0.113519	0	1	2.57323e-13	1	1066	0.182541	0.113519	0	1	3.53776e-13	1	0	Monotone	TRUE	TRUE	FALSE	TRUE	TRUE	TRUE	FALSE	TRUE
wpars40	1066	0.140937	0.00506883	0.073	0.174	0.0619416	0.169233	1066	0.140937	0.00506883	0.081	0.169	0.0679817	0.178629	0.0201028	MIC not significant	FALSE	FALSE	FALSE	FALSE	FALSE	FALSE	FALSE	FALSE
wu540pars	1066	0.134864	0.00841956	0.227	0.595	0.239236	0.611564	1066	0.134864	0.00841956	0.226	0.598	0.241593	0.625365	0.00271147	MIC not significant	FALSE	FALSE	FALSE	FALSE	FALSE	FALSE	FALSE	FALSE
wu540pars40	1066	0.130505	0.00557366	0.439	0.687	0.456962	0.704367	1066	0.130505	0.00557366	0.46	0.722	0.481349	0.725542	0.0147827	MIC not significant	FALSE	FALSE	FALSE	FALSE	FALSE	FALSE	FALSE	FALSE
wu5pars40	1066	0.128438	0.00374733	0.573	0.729	0.590857	0.731928	1066	0.128438	0.00374733	0.568	0.701	0.591304	0.722635	0.0457082	MIC not significant	FALSE	FALSE	FALSE	FALSE	FALSE	FALSE	FALSE	FALSE
wu5parsOrf	1066	0.138376	0.0140293	0.134	0.719	0.131402	0.727952	1066	0.138376	0.0140293	0.126	0.72	0.119744	0.730857	0.000107198	MIC not significant	FALSE	FALSE	FALSE	FALSE	FALSE	FALSE	FALSE	FALSE
r5utrOrf	1267	0.152549	0.0432793	0.001	0.985	1.10374e-05	0.980767	1267	0.152549	0.0432793	0.000105263	0.990908	6.40768e-06	0.983519	7.44779e-14	Monotone	TRUE	TRUE	FALSE	TRUE	TRUE	TRUE	FALSE	TRUE
r3utrOrf	1267	0.188693	0.125874	0	1	3.82508e-23	1	1266	0.189731	0.126004	0	1	7.65678e-24	1	6.79802e-39	Monotone	TRUE	TRUE	FALSE	TRUE	TRUE	TRUE	FALSE	TRUE
r5utr3utr	1266	0.130627	0.0168992	0.138	0.919	0.126535	0.908838	1266	0.130627	0.0168992	0.132	0.911	0.12429	0.896096	3.44432e-06	MIC not significant	FALSE	FALSE	FALSE	FALSE	FALSE	FALSE	FALSE	FALSE
allLens	1267	0.297665	0.29877	0	1	5.21027e-153	1	1267	0.297665	0.29877	0	1	1.808e-152	1	1.3153e-99	Monotone	TRUE	TRUE	FALSE	TRUE	TRUE	TRUE	FALSE	TRUE
all_PARS_numBP_all	1066	0.157704	0.0151609	0.001	0.042	9.48786e-05	0.0321377	1066	0.157704	0.0151609	0.000736842	0.0367763	6.05033e-05	0.0285325	5.55955e-05	Non-monotone	TRUE	TRUE	FALSE	FALSE	TRUE	TRUE	FALSE	FALSE
allgc	1267	0.159989	0.0646195	1.31579e-05	1	1.98503e-08	0.999991	1267	0.159989	0.0646195	1.9802e-05	1	2.15377e-08	0.999991	3.89854e-20	Monotone	TRUE	TRUE	FALSE	TRUE	TRUE	TRUE	FALSE	TRUE
utr540orf40gc	1267	0.108014	0.000336121	0.968	0.961	0.950134	0.94351	1267	0.108014	0.000336121	0.968	0.954	0.943368	0.935621	0.514405	MIC not significant	FALSE	FALSE	FALSE	FALSE	FALSE	FALSE	FALSE	FALSE
utr5orf40gc	1267	0.112247	0.000243708	0.896	0.876	0.879818	0.863637	1267	0.112247	0.000243708	0.916	0.9	0.897892	0.882762	0.578783	MIC not significant	FALSE	FALSE	FALSE	FALSE	FALSE	FALSE	FALSE	FALSE
utr5orfgc	1267	0.130346	0.0270236	0.178	1	0.183568	0.998868	1267	0.130346	0.0270236	0.164842	0.999961	0.168893	0.998887	3.96355e-09	MIC not significant	FALSE	FALSE	FALSE	FALSE	FALSE	FALSE	FALSE	FALSE
orf40utr340gc	1267	0.125151	0.000232651	0.233	0.21	0.23477	0.210195	1267	0.125151	0.000232651	0.245	0.223	0.252059	0.226228	0.587528	MIC not significant	FALSE	FALSE	FALSE	FALSE	FALSE	FALSE	FALSE	FALSE
orf40utr3gc	1267	0.120003	0.00298233	0.558	0.689	0.584861	0.701688	1267	0.120003	0.00298233	0.534	0.669	0.574449	0.698518	0.0519682	MIC not significant	FALSE	FALSE	FALSE	FALSE	FALSE	FALSE	FALSE	FALSE
orfutr3gc	1267	0.170698	0.0652853	0	0.999287	5.99615e-13	0.997014	1267	0.170698	0.0652853	0	0.999317	4.5777e-13	0.997114	2.47259e-20	Monotone	TRUE	TRUE	FALSE	TRUE	TRUE	TRUE	FALSE	TRUE
allmeanFE	1267	0.123449	0.0137559	0.539	0.994	0.563729	0.985159	1267	0.123449	0.0137559	0.501	0.994	0.520371	0.9828	2.88673e-05	MIC not significant	FALSE	FALSE	FALSE	FALSE	FALSE	FALSE	FALSE	FALSE
utr540orf40FE	1267	0.132627	1.2552e-05	0.052	0.045	0.0469833	0.0370164	1267	0.132627	1.2552e-05	0.061	0.051	0.0535749	0.0429151	0.899744	MIC not significant	FALSE	FALSE	FALSE	FALSE	FALSE	FALSE	FALSE	FALSE
utr5orf40FE	1267	0.13831	0.017021	0.015	0.568	0.00920405	0.572904	1267	0.13831	0.017021	0.025	0.594	0.0154697	0.604725	3.17402e-06	non-significant monotone/non-monotone	FALSE	TRUE	FALSE	FALSE	TRUE	TRUE	FALSE	FALSE
utr5orfFE	1267	0.121127	0.0103706	0.69	0.986	0.692748	0.974581	1267	0.121127	0.0103706	0.672	0.982	0.679935	0.971226	0.000284562	MIC not significant	FALSE	FALSE	FALSE	FALSE	FALSE	FALSE	FALSE	FALSE
utr530Corf30CbestATG	1267	0.124146	0.00809571	0.35	0.752	0.362524	0.766842	948	0.12945	0.0024276	0.746	0.796	0.757454	0.810069	0.129534	MIC not significant	FALSE	FALSE	FALSE	FALSE	FALSE	FALSE	FALSE	FALSE
utr530Corf30CmeanATG	1267	0.126582	0.00681593	0.228	0.555	0.230717	0.576851	948	0.140669	0.00129686	0.223	0.233	0.242565	0.256079	0.267995	MIC not significant	FALSE	FALSE	FALSE	FALSE	FALSE	FALSE	FALSE	FALSE
utr530Corf30CbestATG0	1267	0.109578	0.0048866	0.844	0.966	0.849745	0.944331	315	0.174151	0.0117077	0.726	0.875	0.738289	0.87364	0.0550604	MIC not significant	FALSE	FALSE	FALSE	FALSE	FALSE	FALSE	FALSE	FALSE
utr530Corf30CmeanATG0	1267	0.109578	0.00490217	0.849	0.954	0.84137	0.939041	315	0.166748	0.0114212	0.877	0.967	0.87216	0.948739	0.0581696	MIC not significant	FALSE	FALSE	FALSE	FALSE	FALSE	FALSE	FALSE	FALSE
utr530Corf30CbestATG1	1267	0.136527	0.00671943	0.02	0.105	0.0153768	0.0891301	734	0.146544	0.00540943	0.532	0.692	0.550269	0.710588	0.04638	MIC not significant	FALSE	FALSE	FALSE	FALSE	FALSE	FALSE	FALSE	FALSE
utr530Corf30CmeanATG1	1267	0.13621	0.006495	0.014	0.087	0.0124686	0.074337	734	0.157098	0.00484488	0.167	0.259	0.174434	0.280487	0.0594506	MIC not significant	FALSE	FALSE	FALSE	FALSE	TRUE	FALSE	FALSE	FALSE
utr530Corf30CbestATG2	1267	0.124163	0.0104438	0.127	0.531	0.117431	0.53695	215	0.222789	0.00454898	0.219	0.218	0.232396	0.232049	0.324963	MIC not significant	FALSE	FALSE	FALSE	FALSE	FALSE	FALSE	FALSE	FALSE
utr530Corf30CmeanATG2	1267	0.124163	0.0104562	0.121	0.508	0.114149	0.530836	215	0.204027	0.00446306	0.535	0.533	0.553337	0.554105	0.329585	MIC not significant	FALSE	FALSE	FALSE	FALSE	FALSE	FALSE	FALSE	FALSE
utr330Corf30CbestATG	1267	0.126396	0.00010498	0.268	0.226	0.281649	0.243838	1076	0.127081	0.000598931	0.544	0.53	0.567395	0.54683	0.422574	MIC not significant	FALSE	FALSE	FALSE	FALSE	FALSE	FALSE	FALSE	FALSE
utr330Corf30CmeanATG	1267	0.122056	0.000231944	0.515	0.478	0.547836	0.510439	1076	0.132196	0.000986217	0.314	0.317	0.316865	0.317289	0.303392	MIC not significant	FALSE	FALSE	FALSE	FALSE	FALSE	FALSE	FALSE	FALSE
utr330Corf30CbestATG0	1267	0.113465	0.000404822	0.788	0.778	0.787427	0.772505	498	0.147167	0.00285128	0.919	0.937	0.903816	0.916121	0.234256	MIC not significant	FALSE	FALSE	FALSE	FALSE	FALSE	FALSE	FALSE	FALSE
utr330Corf30CmeanATG0	1267	0.113465	0.000398438	0.8	0.783	0.796639	0.782942	498	0.149533	0.00275972	0.868	0.872	0.869784	0.87872	0.241927	MIC not significant	FALSE	FALSE	FALSE	FALSE	FALSE	FALSE	FALSE	FALSE
utr330Corf30CbestATG1	1267	0.11559	0.00040949	0.768	0.76	0.776922	0.761956	822	0.14243	0.00162843	0.509	0.547	0.550604	0.571381	0.247813	MIC not significant	FALSE	FALSE	FALSE	FALSE	FALSE	FALSE	FALSE	FALSE
utr330Corf30CmeanATG1	1267	0.12007	0.000380611	0.503	0.49	0.54464	0.520119	822	0.148376	0.00178193	0.285	0.309	0.280794	0.306863	0.226677	MIC not significant	FALSE	FALSE	FALSE	FALSE	FALSE	FALSE	FALSE	FALSE
utr330Corf30CbestATG2	1267	0.12161	0.00152614	0.276	0.306	0.284411	0.321086	298	0.187893	0.00354763	0.598	0.608	0.634567	0.636001	0.305463	MIC not significant	FALSE	FALSE	FALSE	FALSE	FALSE	FALSE	FALSE	FALSE
utr330Corf30CmeanATG2	1267	0.12161	0.00153123	0.269	0.299	0.272925	0.307409	298	0.185773	0.00364783	0.623	0.645	0.65703	0.66816	0.298718	MIC not significant	FALSE	FALSE	FALSE	FALSE	FALSE	FALSE	FALSE	FALSE
rutr530Corf30CbestATG	1263	0.12917	0.00692151	0.22	0.568	0.228352	0.584287	1262	0.128288	0.00673529	0.265	0.626	0.289505	0.645442	0.00352852	MIC not significant	FALSE	FALSE	FALSE	FALSE	FALSE	FALSE	FALSE	FALSE
rutr530Corf30CmeanATG	1263	0.127438	0.00600348	0.326	0.617	0.337975	0.649663	1262	0.127477	0.005829	0.32	0.625	0.350442	0.646302	0.00665757	MIC not significant	FALSE	FALSE	FALSE	FALSE	FALSE	FALSE	FALSE	FALSE
rutr530Corf30CbestATG0	1263	0.12215	0.0019422	0.627	0.698	0.616294	0.685862	1262	0.120681	0.00208147	0.704	0.781	0.721989	0.787709	0.105236	MIC not significant	FALSE	FALSE	FALSE	FALSE	FALSE	FALSE	FALSE	FALSE
rutr530Corf30CmeanATG0	1263	0.121975	0.00194114	0.604	0.674	0.620617	0.681993	1262	0.120506	0.00208034	0.723	0.798	0.724701	0.789221	0.10533	MIC not significant	FALSE	FALSE	FALSE	FALSE	FALSE	FALSE	FALSE	FALSE
rutr530Corf30CbestATG1	1263	0.130531	0.0043964	0.174	0.352	0.191018	0.370814	1261	0.130886	0.00437129	0.155	0.298	0.16275	0.327498	0.0188721	MIC not significant	FALSE	FALSE	FALSE	FALSE	FALSE	FALSE	FALSE	FALSE
rutr530Corf30CmeanATG1	1263	0.132599	0.00426887	0.141	0.255	0.132817	0.273077	1261	0.13238	0.00424381	0.113	0.237	0.106573	0.242202	0.0206962	MIC not significant	FALSE	FALSE	FALSE	FALSE	FALSE	FALSE	FALSE	FALSE
rutr530Corf30CbestATG2	1263	0.135639	0.00366703	0.042	0.103	0.034137	0.0880301	1262	0.136649	0.0038582	0.04	0.096	0.0326615	0.0851561	0.0273465	non-significant monotone/non-monotone	FALSE	FALSE	FALSE	FALSE	FALSE	TRUE	FALSE	FALSE
rutr530Corf30CmeanATG2	1263	0.135639	0.00365831	0.045	0.094	0.0360338	0.0861477	1262	0.136649	0.00384924	0.027	0.079	0.0234963	0.06452	0.0275267	non-significant monotone/non-monotone	FALSE	TRUE	FALSE	FALSE	FALSE	TRUE	FALSE	FALSE
rutr330Corf30CbestATG	1263	0.111176	1.56194e-06	0.99	0.988	0.97955	0.974067	1262	0.112169	1.90641e-07	0.986	0.977	0.977672	0.96896	0.987637	MIC not significant	FALSE	FALSE	FALSE	FALSE	FALSE	FALSE	FALSE	FALSE
rutr330Corf30CmeanATG	1263	0.13552	4.55635e-07	0.048	0.038	0.0436757	0.0335107	1262	0.134862	1.99113e-08	0.075	0.065	0.0690396	0.0547682	0.996004	MIC not significant	FALSE	FALSE	FALSE	FALSE	FALSE	FALSE	FALSE	FALSE
rutr330Corf30CbestATG0	1263	0.133357	0.000712246	0.093	0.088	0.0931687	0.0890983	1261	0.131594	0.000556395	0.141	0.134	0.139574	0.132139	0.402643	MIC not significant	FALSE	FALSE	FALSE	FALSE	FALSE	FALSE	FALSE	FALSE
rutr330Corf30CmeanATG0	1263	0.128281	0.000713823	0.287	0.284	0.28802	0.282489	1261	0.126106	0.000557776	0.403	0.394	0.414321	0.399409	0.40206	MIC not significant	FALSE	FALSE	FALSE	FALSE	FALSE	FALSE	FALSE	FALSE
rutr330Corf30CbestATG1	1263	0.12351	0.000805573	0.543	0.539	0.553131	0.555627	1262	0.123541	0.000727551	0.561	0.554	0.573851	0.572873	0.338347	MIC not significant	FALSE	FALSE	FALSE	FALSE	FALSE	FALSE	FALSE	FALSE
rutr330Corf30CmeanATG1	1263	0.136182	0.000867629	0.045	0.045	0.0417215	0.0443995	1262	0.133708	0.000786637	0.081	0.08	0.0731502	0.0743304	0.319459	MIC not significant	FALSE	FALSE	FALSE	FALSE	FALSE	FALSE	FALSE	FALSE
rutr330Corf30CbestATG2	1263	0.118468	0.000850649	0.817	0.813	0.8123	0.816845	1262	0.118425	0.000942093	0.816	0.828	0.812315	0.819423	0.27591	MIC not significant	FALSE	FALSE	FALSE	FALSE	FALSE	FALSE	FALSE	FALSE
rutr330Corf30CmeanATG2	1263	0.118468	0.000850288	0.813	0.814	0.809717	0.81252	1262	0.118425	0.000941718	0.824	0.824	0.814707	0.821818	0.276006	MIC not significant	FALSE	FALSE	FALSE	FALSE	FALSE	FALSE	FALSE	FALSE
utr530Corf30CnumATGs	1267	0.141827	0.0173237	0.009	0.229	0.00181745	0.240652	948	0.150097	0.0157357	0.024	0.286	0.0199136	0.304337	0.000107713	non-significant monotone/non-monotone	TRUE	TRUE	FALSE	FALSE	TRUE	TRUE	FALSE	FALSE
utr530Corf30CnumATGs0	1267	0.109578	0.00621895	0.856	0.974	0.855624	0.964913	315	0.150905	1.51047e-06	0.878	0.821	0.863639	0.819173	0.982666	MIC not significant	FALSE	FALSE	FALSE	FALSE	FALSE	FALSE	FALSE	FALSE
utr530Corf30CnumATGs1	1267	0.130097	0.00507289	0.102	0.222	0.0947487	0.228592	734	0.149571	0.00170523	0.215	0.221	0.227756	0.237573	0.26385	MIC not significant	FALSE	FALSE	FALSE	FALSE	FALSE	FALSE	FALSE	FALSE
utr530Corf30CnumATGs2	1267	0.124163	0.011144	0.129	0.579	0.113973	0.586065	215	0.198752	1.73744e-05	0.229	0.169	0.226142	0.160531	0.951548	MIC not significant	FALSE	FALSE	FALSE	FALSE	FALSE	FALSE	FALSE	FALSE
utr330Corf30CnumATGs	1267	0.125218	0.000320197	0.234	0.223	0.23706	0.220072	1076	0.124796	0.000212742	0.431	0.398	0.43669	0.404027	0.632711	MIC not significant	FALSE	FALSE	FALSE	FALSE	FALSE	FALSE	FALSE	FALSE
utr330Corf30CnumATGs0	1267	0.113465	6.16313e-05	0.781	0.753	0.790628	0.762662	498	0.153583	0.000493433	0.402	0.372	0.433238	0.394405	0.620935	MIC not significant	FALSE	FALSE	FALSE	FALSE	FALSE	FALSE	FALSE	FALSE
utr330Corf30CnumATGs1	1267	0.116631	0.00102388	0.627	0.642	0.63399	0.645382	822	0.135375	0.000263112	0.589	0.549	0.610553	0.572744	0.642375	MIC not significant	FALSE	FALSE	FALSE	FALSE	FALSE	FALSE	FALSE	FALSE
utr330Corf30CnumATGs2	1267	0.12161	0.00117607	0.258	0.274	0.280363	0.293146	298	0.152304	0.000959806	0.802	0.755	0.800368	0.761914	0.594248	MIC not significant	FALSE	FALSE	FALSE	FALSE	FALSE	FALSE	FALSE	FALSE
utr5uORFsBio	1267	0.110863	0.00364342	0.441	0.629	0.468408	0.624374	104	0.20864	0.00161809	0.758	0.683	0.773321	0.712721	0.685164	MIC not significant	FALSE	FALSE	FALSE	FALSE	FALSE	FALSE	FALSE	FALSE
u5maxLenuORFsBio	1267	0.110863	0.00370224	0.422	0.583	0.435169	0.598413	104	0.244178	0.00443207	0.427	0.383	0.490606	0.436615	0.501926	MIC not significant	FALSE	FALSE	FALSE	FALSE	FALSE	FALSE	FALSE	FALSE
u5meanLenuORFsBio	1267	0.110863	0.00366452	0.447	0.597	0.462766	0.617186	104	0.29429	0.00195613	0.104	0.075	0.093959	0.0643217	0.655736	MIC not significant	FALSE	FALSE	FALSE	FALSE	FALSE	FALSE	FALSE	FALSE
u5maxCostuORFsBio	1267	0.110863	0.00369291	0.426	0.589	0.444539	0.606002	104	0.24681	0.00387694	0.6	0.544	0.631928	0.578982	0.530058	MIC not significant	FALSE	FALSE	FALSE	FALSE	FALSE	FALSE	FALSE	FALSE
u5meanCostuORFsBio	1267	0.110863	0.00363458	0.46	0.63	0.468862	0.630626	104	0.277211	0.000756226	0.259	0.193	0.276832	0.19137	0.7817	MIC not significant	FALSE	FALSE	FALSE	FALSE	FALSE	FALSE	FALSE	FALSE
utr5uORFs30CBio	1267	0.120998	0.0071109	0.031	0.152	0.0267726	0.152019	68	0.196944	0.0023528	0.88	0.804	0.858499	0.79648	0.694464	MIC not significant	FALSE	FALSE	FALSE	FALSE	FALSE	FALSE	FALSE	FALSE
u5maxLenuORFs30CBio	1267	0.120998	0.00707456	0.034	0.164	0.0241886	0.151597	68	0.22973	8.98299e-05	0.744	0.627	0.750942	0.643774	0.938855	MIC not significant	FALSE	FALSE	FALSE	FALSE	FALSE	FALSE	FALSE	FALSE
u5meanLenuORFs30CBio	1267	0.120998	0.00706144	0.029	0.156	0.0228668	0.156121	68	0.211505	5.70562e-06	0.885	0.788	0.878388	0.792368	0.984576	MIC not significant	FALSE	FALSE	FALSE	FALSE	FALSE	FALSE	FALSE	FALSE
u5maxCostuORFs30CBio	1267	0.120998	0.00703729	0.029	0.134	0.0201322	0.134918	68	0.22973	0.00049698	0.842	0.735	0.84399	0.757024	0.856801	MIC not significant	FALSE	FALSE	FALSE	FALSE	FALSE	FALSE	FALSE	FALSE
u5meanCostuORFs30CBio	1267	0.120998	0.00702851	0.031	0.129	0.0207555	0.134156	68	0.239553	0.00102939	0.812	0.692	0.807835	0.713922	0.795069	MIC not significant	FALSE	FALSE	FALSE	FALSE	FALSE	FALSE	FALSE	FALSE
utr5uORFs0Bio	1267	0.112699	0.00178474	0.19	0.232	0.199656	0.244199	58	0.239328	0.00829483	0.388	0.325	0.453936	0.376929	0.496549	MIC not significant	FALSE	FALSE	FALSE	FALSE	FALSE	FALSE	FALSE	FALSE
utr5uORFs1Bio	1267	0.102814	0.000210968	0.78	0.743	0.78688	0.758701	51	0.261514	0.154973	0.452421	0.999329	0.50254	0.992965	0.00426277	MIC not significant	FALSE	FALSE	FALSE	FALSE	FALSE	FALSE	FALSE	FALSE
utr5uORFs2Bio	1267	0.113408	0.00322122	0.152	0.248	0.137112	0.253395	49	0.229228	0.000326038	0.737	0.616	0.746001	0.638012	0.901994	MIC not significant	FALSE	FALSE	FALSE	FALSE	FALSE	FALSE	FALSE	FALSE
u5maxLenuORFs0Bio	1267	0.112699	0.0018086	0.203	0.261	0.224204	0.274305	58	0.255287	0.0158011	0.441	0.429	0.48203	0.467491	0.347106	MIC not significant	FALSE	FALSE	FALSE	FALSE	FALSE	FALSE	FALSE	FALSE
u5maxLenuORFs1Bio	1267	0.102814	0.000187197	0.791	0.749	0.793025	0.76054	51	0.229563	0.0253744	0.797	0.846	0.805265	0.84147	0.264196	MIC not significant	FALSE	FALSE	FALSE	FALSE	FALSE	FALSE	FALSE	FALSE
u5maxLenuORFs2Bio	1267	0.113408	0.00322327	0.177	0.297	0.179667	0.299114	49	0.377504	0.000397145	0.061	0.026	0.0477023	0.0180869	0.891891	MIC not significant	FALSE	FALSE	FALSE	FALSE	FALSE	FALSE	FALSE	FALSE
u5meanLenuORFs0Bio	1267	0.112699	0.00179791	0.189	0.218	0.203074	0.24242	58	0.255287	0.0105992	0.447	0.41	0.498953	0.437011	0.441868	MIC not significant	FALSE	FALSE	FALSE	FALSE	FALSE	FALSE	FALSE	FALSE
u5meanLenuORFs1Bio	1267	0.102814	0.000177089	0.798	0.773	0.796004	0.76659	51	0.229563	0.00634391	0.821	0.754	0.827261	0.757647	0.578493	MIC not significant	FALSE	FALSE	FALSE	FALSE	FALSE	FALSE	FALSE	FALSE
u5meanLenuORFs2Bio	1267	0.113408	0.00323504	0.163	0.273	0.164638	0.284396	49	0.325586	0.00106818	0.227	0.137	0.243242	0.145	0.823586	MIC not significant	FALSE	FALSE	FALSE	FALSE	FALSE	FALSE	FALSE	FALSE
u5maxCostuORFs0Bio	1267	0.112699	0.00180189	0.193	0.241	0.204399	0.251083	58	0.255287	0.0127384	0.538	0.503	0.574674	0.537953	0.398927	MIC not significant	FALSE	FALSE	FALSE	FALSE	FALSE	FALSE	FALSE	FALSE
u5maxCostuORFs1Bio	1267	0.102814	0.000186476	0.768	0.738	0.788497	0.760989	51	0.232113	0.0239544	0.854	0.886	0.845063	0.865892	0.278168	MIC not significant	FALSE	FALSE	FALSE	FALSE	FALSE	FALSE	FALSE	FALSE
u5maxCostuORFs2Bio	1267	0.113408	0.00322174	0.148	0.248	0.145497	0.259704	49	0.319956	0.000240566	0.326	0.211	0.369591	0.232288	0.915714	MIC not significant	FALSE	FALSE	FALSE	FALSE	FALSE	FALSE	FALSE	FALSE
u5meanCostuORFs0Bio	1267	0.112699	0.00178983	0.206	0.248	0.213551	0.255261	58	0.31864	0.00737122	0.125	0.101	0.120262	0.0890924	0.521647	MIC not significant	FALSE	FALSE	FALSE	FALSE	FALSE	FALSE	FALSE	FALSE
u5meanCostuORFs1Bio	1267	0.102814	0.000174653	0.772	0.73	0.779725	0.751505	51	0.236901	0.00363893	0.85	0.75	0.83	0.747528	0.67412	MIC not significant	FALSE	FALSE	FALSE	FALSE	FALSE	FALSE	FALSE	FALSE
u5meanCostuORFs2Bio	1267	0.113408	0.0032407	0.153	0.258	0.145148	0.258846	49	0.329322	0.00185446	0.255	0.166	0.280336	0.181438	0.768912	MIC not significant	FALSE	FALSE	FALSE	FALSE	FALSE	FALSE	FALSE	FALSE
orfuORFsBio	1267	0.193442	0.147808	0	1	1.26678e-22	1	1183	0.200064	0.195489	0	1	2.07472e-24	1	8.61502e-58	Monotone	TRUE	TRUE	FALSE	TRUE	TRUE	TRUE	FALSE	TRUE
orfmaxLenuORFsBio	1267	0.271329	0.212071	0	1	3.50176e-99	1	1183	0.288064	0.279898	0	1	2.53276e-113	1	2.70598e-86	Monotone	TRUE	TRUE	FALSE	TRUE	TRUE	TRUE	FALSE	TRUE
orfmeanLenuORFsBio	1267	0.274859	0.199668	0	1	1.35678e-118	1	1183	0.290678	0.263534	0	1	1.21867e-131	1	1.61372e-80	Monotone	TRUE	TRUE	FALSE	TRUE	TRUE	TRUE	FALSE	TRUE
orfmaxCostuORFsBio	1267	0.277629	0.207076	0	1	7.87308e-123	1	1183	0.294437	0.273328	0	1	1.37673e-136	1	5.84421e-84	Monotone	TRUE	TRUE	FALSE	TRUE	TRUE	TRUE	FALSE	TRUE
orfmeanCostuORFsBio	1267	0.25802	0.193773	0	1	7.30696e-94	1	1183	0.27627	0.255778	0	1	9.80232e-109	1	0	Monotone	TRUE	TRUE	FALSE	TRUE	TRUE	TRUE	FALSE	TRUE
orfuORFs30CBio	1267	0.130281	0.0115967	0.071	0.496	0.0721892	0.503322	930	0.140537	0.0125593	0.207	0.628	0.206539	0.647026	0.00061749	MIC not significant	FALSE	FALSE	FALSE	FALSE	FALSE	FALSE	FALSE	FALSE
orfmaxLenuORFs30CBio	1267	0.125904	0.000877226	0.224	0.224	0.225751	0.229309	930	0.143351	0.00131363	0.122	0.123	0.128275	0.13199	0.269518	MIC not significant	FALSE	FALSE	FALSE	FALSE	FALSE	FALSE	FALSE	FALSE
orfmeanLenuORFs30CBio	1267	0.129408	0.000429815	0.114	0.108	0.102196	0.0942642	930	0.135658	0.00278126	0.362	0.436	0.368756	0.440103	0.108002	MIC not significant	FALSE	FALSE	FALSE	FALSE	FALSE	FALSE	FALSE	FALSE
orfmaxCostuORFs30CBio	1267	0.124072	0.000845438	0.311	0.322	0.322796	0.327364	930	0.149386	0.00137812	0.07	0.075	0.0562925	0.0605675	0.258069	MIC not significant	FALSE	FALSE	FALSE	FALSE	FALSE	FALSE	FALSE	FALSE
orfmeanCostuORFs30CBio	1267	0.132108	0.00041158	0.086	0.079	0.06558	0.0578194	930	0.13999	0.00285812	0.311	0.385	0.330595	0.413591	0.103244	MIC not significant	FALSE	FALSE	FALSE	FALSE	FALSE	FALSE	FALSE	FALSE
orfuORFs200CBio	1267	0.118646	0.000991255	0.559	0.569	0.580975	0.590905	1255	0.121672	0.00175245	0.455	0.51	0.472891	0.52579	0.138292	MIC not significant	FALSE	FALSE	FALSE	FALSE	FALSE	FALSE	FALSE	FALSE
orfmaxLenuORFs200CBio	1267	0.264476	0.233462	0	1	1.17598e-90	1	1255	0.265747	0.232918	0	1	6.56645e-89	1	3.32223e-74	Monotone	TRUE	TRUE	FALSE	TRUE	TRUE	TRUE	FALSE	TRUE
orfmeanLenuORFs200CBio	1267	0.261338	0.218729	0	1	5.73325e-99	1	1255	0.257776	0.217888	0	1	1.7279e-90	1	6.54071e-69	Monotone	TRUE	TRUE	FALSE	TRUE	TRUE	TRUE	FALSE	TRUE
orfmaxCostuORFs200CBio	1267	0.27441	0.228348	0	1	5.20488e-118	1	1255	0.272846	0.227715	0	1	1.24334e-111	1	2.32163e-72	Monotone	TRUE	TRUE	FALSE	TRUE	TRUE	TRUE	FALSE	TRUE
orfmeanCostuORFs200CBio	1267	0.252863	0.214652	0	1	1.07938e-86	1	1255	0.252097	0.213744	0	1	4.14072e-83	1	1.80898e-67	Monotone	TRUE	TRUE	FALSE	TRUE	TRUE	TRUE	FALSE	TRUE
orfuORFs0Bio	1267	0.201672	0.190981	0	1	5.68465e-28	1	1216	0.197821	0.18018	0	1	2.36965e-23	1	2.27645e-54	Monotone	TRUE	TRUE	FALSE	TRUE	TRUE	TRUE	FALSE	TRUE
orfuORFs1Bio	1267	0.195163	0.127274	0	1	1.4087e-23	1	1203	0.198362	0.161008	0	1	8.43842e-23	1	9.40242e-48	Monotone	TRUE	TRUE	FALSE	TRUE	TRUE	TRUE	FALSE	TRUE
orfuORFs2Bio	1267	0.154638	0.0824609	1.31579e-05	1	1.823e-06	1	1044	0.144873	0.0579348	0.0268911	1	0.0204792	0.999998	3.17023e-15	Monotone	TRUE	TRUE	FALSE	TRUE	TRUE	TRUE	FALSE	TRUE
orfmaxLenuORFs0Bio	1267	0.285311	0.274366	0	1	3.35674e-117	1	1216	0.281155	0.269474	0	1	8.38889e-106	1	7.41666e-85	Monotone	TRUE	TRUE	FALSE	TRUE	TRUE	TRUE	FALSE	TRUE
orfmaxLenuORFs1Bio	1267	0.141875	0.0690163	0.006	1	0.00248895	1	1203	0.155813	0.0878784	0.000128713	1	8.94224e-06	1	7.90908e-26	Monotone	TRUE	TRUE	FALSE	TRUE	TRUE	TRUE	FALSE	TRUE
orfmaxLenuORFs2Bio	1267	0.140583	0.0432209	0.005	0.999	0.00226496	0.998019	1044	0.127194	0.0151409	0.476	0.966	0.496426	0.951804	6.71358e-05	MIC not significant	TRUE	FALSE	FALSE	FALSE	TRUE	FALSE	FALSE	FALSE
orfmeanLenuORFs0Bio	1267	0.27814	0.256734	0	1	1.43445e-121	1	1216	0.272319	0.250378	0	1	2.42177e-106	1	4.88156e-78	Monotone	TRUE	TRUE	FALSE	TRUE	TRUE	TRUE	FALSE	TRUE
orfmeanLenuORFs1Bio	1267	0.142686	0.0139146	0.006	0.103	0.00103273	0.114657	1203	0.147824	0.0183223	0.003	0.179	0.000394123	0.184968	2.4568e-06	non-significant monotone/non-monotone	TRUE	TRUE	FALSE	FALSE	TRUE	TRUE	FALSE	FALSE
orfmeanLenuORFs2Bio	1267	0.131477	0.0255407	0.086	0.968	0.0786549	0.957678	1044	0.126496	0.0026653	0.521	0.608	0.542917	0.620116	0.0954711	MIC not significant	FALSE	FALSE	FALSE	FALSE	FALSE	FALSE	FALSE	FALSE
orfmaxCostuORFs0Bio	1267	0.292042	0.267433	0	1	8.48896e-146	1	1216	0.285256	0.262002	0	1	1.42528e-125	1	3.62249e-82	Monotone	TRUE	TRUE	FALSE	TRUE	TRUE	TRUE	FALSE	TRUE
orfmaxCostuORFs1Bio	1267	0.159203	0.0643425	1.31579e-05	1	1.47304e-08	0.99997	1203	0.16307	0.0820212	9.90099e-06	1	1.39358e-08	1	3.82107e-24	Monotone	TRUE	TRUE	FALSE	TRUE	TRUE	TRUE	FALSE	TRUE
orfmaxCostuORFs2Bio	1267	0.146853	0.0430022	0.002	0.993	0.000122552	0.988686	1044	0.141746	0.0150585	0.06	0.562	0.0495645	0.583071	7.03017e-05	MIC not significant	TRUE	FALSE	FALSE	FALSE	TRUE	FALSE	FALSE	FALSE
orfmeanCostuORFs0Bio	1267	0.279674	0.249298	0	1	3.24577e-126	1	1216	0.274174	0.242392	0	1	3.35399e-109	1	3.08454e-75	Monotone	TRUE	TRUE	FALSE	TRUE	TRUE	TRUE	FALSE	TRUE
orfmeanCostuORFs1Bio	1267	0.136261	0.0127258	0.034	0.441	0.0274947	0.462285	1203	0.140276	0.016807	0.03	0.587	0.0195049	0.614865	6.45516e-06	non-significant monotone/non-monotone	FALSE	TRUE	FALSE	FALSE	FALSE	TRUE	FALSE	FALSE
orfmeanCostuORFs2Bio	1267	0.140914	0.0251367	0.009	0.743	0.00329192	0.771357	1044	0.130185	0.00253926	0.467	0.556	0.494998	0.583165	0.10368	MIC not significant	TRUE	FALSE	FALSE	FALSE	TRUE	FALSE	FALSE	FALSE
orfuORFs030CBio	1267	0.11132	0.00498744	0.756	0.921	0.773871	0.903053	298	0.144564	0.000635447	0.968	0.955	0.952237	0.938411	0.664725	MIC not significant	FALSE	FALSE	FALSE	FALSE	FALSE	FALSE	FALSE	FALSE
orfuORFs130CBio	1267	0.128632	0.00474351	0.134	0.274	0.117306	0.257882	723	0.134932	0.000780914	0.619	0.594	0.631719	0.610456	0.453107	MIC not significant	FALSE	FALSE	FALSE	FALSE	FALSE	FALSE	FALSE	FALSE
orfuORFs230CBio	1267	0.121517	0.00610663	0.168	0.411	0.177561	0.417969	195	0.201267	0.000344811	0.153	0.117	0.156139	0.111229	0.796671	MIC not significant	FALSE	FALSE	FALSE	FALSE	FALSE	FALSE	FALSE	FALSE
orfmaxLenuORFs030CBio	1267	0.118998	0.000937066	0.369	0.384	0.390972	0.398582	298	0.32898	0.317201	0	1	1.64573e-15	1	2.441e-26	MIC not significant	FALSE	TRUE	FALSE	FALSE	FALSE	TRUE	FALSE	FALSE
orfmaxLenuORFs130CBio	1267	0.128888	0.000952311	0.128	0.124	0.124261	0.123732	723	0.147559	0.0072993	0.215	0.397	0.21996	0.415434	0.0215911	MIC not significant	FALSE	FALSE	FALSE	FALSE	FALSE	FALSE	FALSE	FALSE
orfmaxLenuORFs230CBio	1267	0.121517	0.00619562	0.177	0.391	0.176748	0.414866	195	0.1548	0.00152037	0.955	0.939	0.940431	0.922692	0.588372	MIC not significant	FALSE	FALSE	FALSE	FALSE	FALSE	FALSE	FALSE	FALSE
orfmeanLenuORFs030CBio	1267	0.11575	0.000938405	0.556	0.573	0.581434	0.589674	298	0.32898	0.316856	0	1	1.35462e-15	1	2.63174e-26	MIC not significant	FALSE	TRUE	FALSE	FALSE	FALSE	TRUE	FALSE	FALSE
orfmeanLenuORFs130CBio	1267	0.128402	0.00051815	0.123	0.111	0.118644	0.111821	723	0.134163	0.011957	0.661	0.929	0.678647	0.925783	0.00324031	MIC not significant	FALSE	FALSE	FALSE	FALSE	FALSE	FALSE	FALSE	FALSE
orfmeanLenuORFs230CBio	1267	0.121517	0.00619967	0.176	0.402	0.168237	0.409024	195	0.1548	0.00152828	0.968	0.951	0.954169	0.936925	0.587402	MIC not significant	FALSE	FALSE	FALSE	FALSE	FALSE	FALSE	FALSE	FALSE
orfmaxCostuORFs030CBio	1267	0.111767	0.000965926	0.762	0.767	0.77483	0.782417	298	0.330944	0.309547	0	1	3.14607e-15	1	0	MIC not significant	FALSE	TRUE	FALSE	FALSE	FALSE	TRUE	FALSE	FALSE
orfmaxCostuORFs130CBio	1267	0.122881	0.00102255	0.349	0.358	0.37704	0.39005	723	0.14379	0.00670341	0.423	0.633	0.444929	0.648735	0.0277092	MIC not significant	FALSE	FALSE	FALSE	FALSE	FALSE	FALSE	FALSE	FALSE
orfmaxCostuORFs230CBio	1267	0.121517	0.00615988	0.154	0.361	0.153153	0.380798	195	0.179156	0.00106637	0.905	0.851	0.880804	0.840513	0.650407	MIC not significant	FALSE	FALSE	FALSE	FALSE	FALSE	FALSE	FALSE	FALSE
orfmeanCostuORFs030CBio	1267	0.117086	0.000968481	0.5	0.516	0.508001	0.515098	298	0.334419	0.308913	0	1	5.54274e-16	1	0	MIC not significant	FALSE	TRUE	FALSE	FALSE	FALSE	TRUE	FALSE	FALSE
orfmeanCostuORFs130CBio	1267	0.124462	0.000586383	0.269	0.26	0.282598	0.269409	723	0.142849	0.0109786	0.488	0.847	0.51293	0.840602	0.00479857	MIC not significant	FALSE	FALSE	FALSE	FALSE	FALSE	FALSE	FALSE	FALSE
orfmeanCostuORFs230CBio	1267	0.121517	0.00616159	0.159	0.372	0.156076	0.392864	195	0.178887	0.00106162	0.864	0.821	0.858071	0.816903	0.651135	MIC not significant	FALSE	FALSE	FALSE	FALSE	FALSE	FALSE	FALSE	FALSE
orfuORFs0200CBio	1267	0.126123	0.00107599	0.196	0.205	0.215039	0.22009	1159	0.124531	0.000142176	0.399	0.357	0.407759	0.367176	0.685103	MIC not significant	FALSE	FALSE	FALSE	FALSE	FALSE	FALSE	FALSE	FALSE
orfuORFs1200CBio	1267	0.128522	0.00193301	0.146	0.174	0.140995	0.176026	1248	0.129599	0.00305144	0.139	0.211	0.144308	0.223307	0.0510577	MIC not significant	FALSE	FALSE	FALSE	FALSE	FALSE	FALSE	FALSE	FALSE
orfuORFs2200CBio	1267	0.115972	0.000952751	0.684	0.687	0.698318	0.705893	790	0.131811	0.00420457	0.753	0.839	0.752698	0.833419	0.0685219	MIC not significant	FALSE	FALSE	FALSE	FALSE	FALSE	FALSE	FALSE	FALSE
orfmaxLenuORFs0200CBio	1267	0.270139	0.228352	0	1	3.22995e-96	1	1159	0.287634	0.27533	0	1	3.32811e-106	1	5.49943e-83	Monotone	TRUE	TRUE	FALSE	TRUE	TRUE	TRUE	FALSE	TRUE
orfmaxLenuORFs1200CBio	1267	0.115874	0.0114522	0.717	0.984	0.724179	0.978007	1248	0.11696	0.0101701	0.726	0.975	0.732188	0.96798	0.000359505	MIC not significant	FALSE	FALSE	FALSE	FALSE	FALSE	FALSE	FALSE	FALSE
orfmaxLenuORFs2200CBio	1267	0.12446	0.000165406	0.28	0.243	0.287927	0.259369	790	0.150235	0.000261894	0.134	0.119	0.119984	0.102699	0.649708	MIC not significant	FALSE	FALSE	FALSE	FALSE	FALSE	FALSE	FALSE	FALSE
orfmeanLenuORFs0200CBio	1267	0.277212	0.234808	0	1	3.89373e-119	1	1159	0.292321	0.28384	0	1	2.96499e-124	1	5.83255e-86	Monotone	TRUE	TRUE	FALSE	TRUE	TRUE	TRUE	FALSE	TRUE
orfmeanLenuORFs1200CBio	1267	0.137366	0.0128712	0.024	0.257	0.0121609	0.260481	1248	0.138623	0.0115611	0.02	0.22	0.015148	0.215245	0.000141416	non-significant monotone/non-monotone	FALSE	TRUE	FALSE	FALSE	TRUE	TRUE	FALSE	FALSE
orfmeanLenuORFs2200CBio	1267	0.129368	4.41861e-06	0.093	0.075	0.09837	0.0795805	790	0.124988	0.000112097	0.923	0.904	0.914764	0.895976	0.766373	MIC not significant	FALSE	FALSE	FALSE	FALSE	FALSE	FALSE	FALSE	FALSE
orfmaxCostuORFs0200CBio	1267	0.279228	0.223019	0	1	9.86955e-126	1	1159	0.290747	0.268319	0	1	6.18337e-123	1	1.46195e-80	Monotone	TRUE	TRUE	FALSE	TRUE	TRUE	TRUE	FALSE	TRUE
orfmaxCostuORFs1200CBio	1267	0.117211	0.00887235	0.776	0.99	0.774305	0.975845	1248	0.116968	0.00767637	0.861	0.994	0.860709	0.983081	0.00194809	MIC not significant	FALSE	FALSE	FALSE	FALSE	FALSE	FALSE	FALSE	FALSE
orfmaxCostuORFs2200CBio	1267	0.122371	0.000306836	0.353	0.333	0.373832	0.347146	790	0.138601	0.000766304	0.518	0.501	0.547269	0.527206	0.437171	MIC not significant	FALSE	FALSE	FALSE	FALSE	FALSE	FALSE	FALSE	FALSE
orfmeanCostuORFs0200CBio	1267	0.294158	0.230343	0	1	7.34747e-151	1	1159	0.310178	0.277966	0	1	2.13567e-152	1	6.64799e-84	Monotone	TRUE	TRUE	FALSE	TRUE	TRUE	TRUE	FALSE	TRUE
orfmeanCostuORFs1200CBio	1267	0.125788	0.0109307	0.346	0.892	0.366862	0.885198	1248	0.128206	0.00967125	0.33	0.82	0.348726	0.822546	0.000503092	MIC not significant	FALSE	FALSE	FALSE	FALSE	FALSE	FALSE	FALSE	FALSE
orfmeanCostuORFs2200CBio	1267	0.124513	3.26665e-05	0.273	0.237	0.303853	0.269134	790	0.147164	2.85721e-06	0.24	0.202	0.252459	0.210828	0.962167	MIC not significant	FALSE	FALSE	FALSE	FALSE	FALSE	FALSE	FALSE	FALSE
orfgcWin1	1267	0.120265	0.00853828	0.478	0.846	0.49677	0.852468	1267	0.120265	0.00853828	0.462	0.833	0.475301	0.832505	0.000991694	MIC not significant	FALSE	FALSE	FALSE	FALSE	FALSE	FALSE	FALSE	FALSE
orfgcWin2	1267	0.11881	0.00948582	0.544	0.91	0.56529	0.904886	1267	0.11881	0.00948582	0.562	0.909	0.579301	0.913278	0.000517347	MIC not significant	FALSE	FALSE	FALSE	FALSE	FALSE	FALSE	FALSE	FALSE
orfgcWin3	1267	0.112998	0.00910201	0.808	0.984	0.810309	0.977356	1267	0.112998	0.00910201	0.838	0.989	0.837713	0.984155	0.000673062	MIC not significant	FALSE	FALSE	FALSE	FALSE	FALSE	FALSE	FALSE	FALSE
orfgcWin4	1267	0.115102	0.00872254	0.728	0.969	0.745956	0.955496	1267	0.115102	0.00872254	0.732	0.958	0.737384	0.956367	0.000873562	MIC not significant	FALSE	FALSE	FALSE	FALSE	FALSE	FALSE	FALSE	FALSE
orfgcWin5	1267	0.121033	0.0108563	0.41	0.899	0.435305	0.886403	1267	0.121033	0.0108563	0.428	0.896	0.449725	0.882182	0.000203026	MIC not significant	FALSE	FALSE	FALSE	FALSE	FALSE	FALSE	FALSE	FALSE
orfgcWin6	1267	0.114882	0.0139938	0.757	0.997	0.75865	0.992889	1267	0.114882	0.0139938	0.751	0.997	0.761229	0.993269	2.42793e-05	MIC not significant	FALSE	FALSE	FALSE	FALSE	FALSE	FALSE	FALSE	FALSE
orfgcWin7	1267	0.112988	0.0141594	0.834	1	0.826587	0.996441	1267	0.112988	0.0141594	0.838	0.998	0.839063	0.997268	2.17159e-05	MIC not significant	FALSE	FALSE	FALSE	FALSE	FALSE	FALSE	FALSE	FALSE
orfgcWin8	1267	0.130238	0.0131375	0.109	0.614	0.100752	0.630828	1267	0.130238	0.0131375	0.085	0.598	0.0801194	0.598868	4.32644e-05	MIC not significant	FALSE	FALSE	FALSE	FALSE	FALSE	FALSE	FALSE	FALSE
orfgcWin9	1267	0.11473	0.012828	0.758	0.995	0.769447	0.991555	1267	0.11473	0.012828	0.769	0.993	0.762823	0.98833	5.33276e-05	MIC not significant	FALSE	FALSE	FALSE	FALSE	FALSE	FALSE	FALSE	FALSE
orfgcWin10	1267	0.122597	0.0132826	0.361	0.912	0.386269	0.90317	1267	0.122597	0.0132826	0.373	0.925	0.395432	0.915749	3.92283e-05	MIC not significant	FALSE	FALSE	FALSE	FALSE	FALSE	FALSE	FALSE	FALSE
orfgcWin11	1267	0.131656	0.0149368	0.077	0.651	0.0681478	0.665662	1267	0.131656	0.0149368	0.078	0.606	0.0681161	0.636774	1.28671e-05	MIC not significant	FALSE	FALSE	FALSE	FALSE	FALSE	FALSE	FALSE	FALSE
orfgcWin12	1267	0.121722	0.0147059	0.39	0.965	0.414836	0.95534	1267	0.121722	0.0147059	0.365	0.959	0.392483	0.94324	1.50307e-05	MIC not significant	FALSE	FALSE	FALSE	FALSE	FALSE	FALSE	FALSE	FALSE
orfgcWin13	1267	0.133754	0.0145745	0.03	0.485	0.0323623	0.511957	1267	0.133754	0.0145745	0.047	0.519	0.0421889	0.520084	1.64205e-05	non-significant monotone/non-monotone	FALSE	FALSE	FALSE	FALSE	FALSE	FALSE	FALSE	FALSE
orfgcWin14	1267	0.120553	0.0141989	0.454	0.965	0.459986	0.956525	1267	0.120553	0.0141989	0.481	0.969	0.491067	0.960932	2.11464e-05	MIC not significant	FALSE	FALSE	FALSE	FALSE	FALSE	FALSE	FALSE	FALSE
orfgcWin15	1267	0.130617	0.0134878	0.093	0.573	0.0820809	0.601522	1267	0.130617	0.0134878	0.076	0.602	0.0734162	0.61356	3.41536e-05	MIC not significant	FALSE	FALSE	FALSE	FALSE	FALSE	FALSE	FALSE	FALSE
orfgcWin16	1267	0.136975	0.0153197	0.017	0.376	0.0135942	0.381761	1267	0.136975	0.0153197	0.014	0.366	0.0111188	0.369078	9.94621e-06	non-significant monotone/non-monotone	FALSE	TRUE	FALSE	FALSE	TRUE	TRUE	FALSE	FALSE
orfgcWin17	1267	0.139686	0.0139874	0.007	0.197	0.00485016	0.199928	1267	0.139686	0.0139874	0.01	0.208	0.00536791	0.206789	2.43848e-05	non-significant monotone/non-monotone	TRUE	TRUE	FALSE	FALSE	TRUE	TRUE	FALSE	FALSE
orfgcWin18	1267	0.123357	0.0148395	0.314	0.944	0.331705	0.930426	1267	0.123357	0.0148395	0.294	0.928	0.314337	0.920041	1.37382e-05	MIC not significant	FALSE	FALSE	FALSE	FALSE	FALSE	FALSE	FALSE	FALSE
orfgcWin19	1267	0.119132	0.0145451	0.549	0.983	0.561157	0.977386	1267	0.119132	0.0145451	0.53	0.978	0.547976	0.97465	1.67486e-05	MIC not significant	FALSE	FALSE	FALSE	FALSE	FALSE	FALSE	FALSE	FALSE
orfgcWin20	1267	0.120021	0.0147523	0.503	0.964	0.509906	0.962459	1267	0.120021	0.0147523	0.48	0.97	0.489519	0.963668	1.45682e-05	MIC not significant	FALSE	FALSE	FALSE	FALSE	FALSE	FALSE	FALSE	FALSE
orfgcWin21	1267	0.116763	0.0167701	0.656	0.998	0.667975	0.994644	1267	0.116763	0.0167701	0.673	0.999	0.680217	0.996562	3.75584e-06	MIC not significant	FALSE	FALSE	FALSE	FALSE	FALSE	FALSE	FALSE	FALSE
orfgcWin22	1267	0.116225	0.0159096	0.685	0.996	0.696353	0.993319	1267	0.116225	0.0159096	0.682	0.995	0.691882	0.994443	6.69157e-06	MIC not significant	FALSE	FALSE	FALSE	FALSE	FALSE	FALSE	FALSE	FALSE
orfgcWin23	1267	0.125054	0.0163107	0.256	0.919	0.261293	0.91726	1267	0.125054	0.0163107	0.258	0.934	0.259911	0.924786	5.11167e-06	MIC not significant	FALSE	FALSE	FALSE	FALSE	FALSE	FALSE	FALSE	FALSE
orfgcWin24	1267	0.115331	0.0166606	0.713	1	0.730552	0.996981	1267	0.115331	0.0166606	0.718	0.999	0.745342	0.997439	4.04205e-06	MIC not significant	FALSE	FALSE	FALSE	FALSE	FALSE	FALSE	FALSE	FALSE
orfgcWin25	1267	0.123398	0.0175236	0.301	0.963	0.320424	0.963012	1267	0.123398	0.0175236	0.319	0.963	0.335951	0.957606	2.26614e-06	MIC not significant	FALSE	FALSE	FALSE	FALSE	FALSE	FALSE	FALSE	FALSE
orfgcWin26	1267	0.117597	0.018031	0.612	1	0.630249	0.995704	1267	0.117597	0.018031	0.636	0.995	0.639486	0.996019	1.61305e-06	MIC not significant	FALSE	FALSE	FALSE	FALSE	FALSE	FALSE	FALSE	FALSE
orfgcWin27	1267	0.121644	0.0167479	0.397	0.979	0.411555	0.972916	1267	0.121644	0.0167479	0.389	0.98	0.416345	0.970254	3.81217e-06	MIC not significant	FALSE	FALSE	FALSE	FALSE	FALSE	FALSE	FALSE	FALSE
orfgcWin28	1267	0.130059	0.0177503	0.099	0.837	0.0892292	0.82705	1267	0.130059	0.0177503	0.102	0.823	0.102082	0.82411	1.94679e-06	MIC not significant	FALSE	FALSE	FALSE	FALSE	FALSE	FALSE	FALSE	FALSE
orfgcWin29	1267	0.122192	0.0138329	0.368	0.936	0.390392	0.930886	1267	0.122192	0.0138329	0.355	0.926	0.372231	0.918087	2.70617e-05	MIC not significant	FALSE	FALSE	FALSE	FALSE	FALSE	FALSE	FALSE	FALSE
orfgcWin30	1267	0.123556	0.0135635	0.3	0.906	0.318587	0.898859	1267	0.123556	0.0135635	0.301	0.9	0.316352	0.893591	3.24535e-05	MIC not significant	FALSE	FALSE	FALSE	FALSE	FALSE	FALSE	FALSE	FALSE
orfgcWin31	1267	0.118686	0.0145404	0.532	0.979	0.542803	0.973665	1267	0.118686	0.0145404	0.573	0.988	0.586667	0.980421	1.68008e-05	MIC not significant	FALSE	FALSE	FALSE	FALSE	FALSE	FALSE	FALSE	FALSE
orfgcWin32	1267	0.116467	0.0151958	0.682	0.994	0.684917	0.990927	1267	0.116467	0.0151958	0.695	0.993	0.701252	0.992797	1.08107e-05	MIC not significant	FALSE	FALSE	FALSE	FALSE	FALSE	FALSE	FALSE	FALSE
orfgcWin33	1267	0.123342	0.0111377	0.344	0.819	0.349091	0.825745	1267	0.123342	0.0111377	0.321	0.827	0.344692	0.823899	0.000167671	MIC not significant	FALSE	FALSE	FALSE	FALSE	FALSE	FALSE	FALSE	FALSE
orfgcWin34	1267	0.13541	0.00889467	0.038	0.181	0.0263671	0.183435	1267	0.13541	0.00889467	0.033	0.174	0.0240274	0.177924	0.000776061	non-significant monotone/non-monotone	FALSE	TRUE	FALSE	FALSE	FALSE	TRUE	FALSE	FALSE
orfgcWin35	1267	0.131285	0.0102629	0.073	0.384	0.0632263	0.398958	1267	0.131285	0.0102629	0.07	0.387	0.0672407	0.404127	0.000304179	MIC not significant	FALSE	FALSE	FALSE	FALSE	FALSE	FALSE	FALSE	FALSE
orfgcWin36	1267	0.129774	0.00793846	0.107	0.34	0.098465	0.360639	1267	0.129774	0.00793846	0.119	0.373	0.114902	0.38689	0.00150031	MIC not significant	FALSE	FALSE	FALSE	FALSE	FALSE	FALSE	FALSE	FALSE
orfgcWin37	1267	0.120138	0.00708406	0.506	0.806	0.519789	0.813307	1267	0.120138	0.00708406	0.49	0.791	0.50224	0.802348	0.00271508	MIC not significant	FALSE	FALSE	FALSE	FALSE	FALSE	FALSE	FALSE	FALSE
orfgcWin38	1267	0.126828	0.00687047	0.197	0.463	0.187312	0.470956	1267	0.126828	0.00687047	0.178	0.459	0.181004	0.455674	0.00315138	MIC not significant	FALSE	FALSE	FALSE	FALSE	FALSE	FALSE	FALSE	FALSE
orfgcWin39	1267	0.127176	0.0078141	0.153	0.451	0.152783	0.468402	1267	0.127176	0.0078141	0.173	0.481	0.174263	0.501564	0.00163515	MIC not significant	FALSE	FALSE	FALSE	FALSE	FALSE	FALSE	FALSE	FALSE
orfgcWin40	1267	0.13017	0.00831827	0.082	0.376	0.0860458	0.36903	1267	0.13017	0.00831827	0.078	0.359	0.0842376	0.362625	0.00115408	MIC not significant	FALSE	FALSE	FALSE	FALSE	FALSE	FALSE	FALSE	FALSE
orfgcWin41	1267	0.138487	0.00930606	0.013	0.097	0.00763631	0.0947534	1267	0.138487	0.00930606	0.01	0.087	0.00563204	0.0830682	0.000585158	non-significant monotone/non-monotone	TRUE	TRUE	FALSE	FALSE	TRUE	TRUE	FALSE	FALSE
orfgcWin42	1267	0.134953	0.0078254	0.03	0.141	0.023196	0.144598	1267	0.134953	0.0078254	0.024	0.146	0.022711	0.142975	0.00162241	non-significant monotone/non-monotone	FALSE	TRUE	FALSE	FALSE	FALSE	TRUE	FALSE	FALSE
orfgcWin43	1267	0.126373	0.00758413	0.207	0.539	0.216191	0.544536	1267	0.126373	0.00758413	0.228	0.524	0.228259	0.551072	0.00191771	MIC not significant	FALSE	FALSE	FALSE	FALSE	FALSE	FALSE	FALSE	FALSE
orfgcWin44	1267	0.12264	0.00717017	0.381	0.673	0.368481	0.68553	1267	0.12264	0.00717017	0.347	0.712	0.375452	0.711058	0.00255701	MIC not significant	FALSE	FALSE	FALSE	FALSE	FALSE	FALSE	FALSE	FALSE
orfgcWin45	1267	0.139764	0.00660799	0.007	0.035	0.00453927	0.0331146	1267	0.139764	0.00660799	0.016	0.042	0.0046718	0.0330661	0.00378634	Non-monotone	TRUE	TRUE	FALSE	FALSE	TRUE	TRUE	FALSE	FALSE
orfgcWin46	1267	0.126861	0.00513288	0.192	0.36	0.190475	0.376904	1267	0.126861	0.00513288	0.155	0.342	0.166119	0.359615	0.0107436	MIC not significant	FALSE	FALSE	FALSE	FALSE	FALSE	FALSE	FALSE	FALSE
orfgcWin47	1267	0.124068	0.00453249	0.285	0.472	0.314192	0.495169	1267	0.124068	0.00453249	0.28	0.467	0.287946	0.472779	0.0165417	MIC not significant	FALSE	FALSE	FALSE	FALSE	FALSE	FALSE	FALSE	FALSE
orfgcWin48	1267	0.134429	0.00365535	0.042	0.067	0.0301893	0.0653939	1267	0.134429	0.00365535	0.032	0.058	0.028476	0.0634019	0.0314055	non-significant monotone/non-monotone	FALSE	TRUE	FALSE	FALSE	FALSE	TRUE	FALSE	FALSE
orfgcWin49	1267	0.125638	0.00385023	0.239	0.352	0.233286	0.371364	1267	0.125638	0.00385023	0.215	0.343	0.219039	0.359329	0.0272009	MIC not significant	FALSE	FALSE	FALSE	FALSE	FALSE	FALSE	FALSE	FALSE
orfgcWin50	1267	0.128265	0.00424222	0.143	0.259	0.137904	0.263205	1267	0.128265	0.00424222	0.118	0.222	0.115784	0.239923	0.0204191	MIC not significant	FALSE	FALSE	FALSE	FALSE	FALSE	FALSE	FALSE	FALSE
orfgcWin51	1267	0.129183	0.00448049	0.106	0.207	0.0943832	0.209614	1267	0.129183	0.00448049	0.108	0.219	0.110044	0.231678	0.0171759	MIC not significant	FALSE	FALSE	FALSE	FALSE	FALSE	FALSE	FALSE	FALSE
orfgcWin52	1267	0.125445	0.00432472	0.232	0.41	0.244154	0.409866	1267	0.125445	0.00432472	0.214	0.379	0.217026	0.390189	0.0192301	MIC not significant	FALSE	FALSE	FALSE	FALSE	FALSE	FALSE	FALSE	FALSE
orfgcWin53	1267	0.136206	0.00340782	0.016	0.033	0.0135846	0.0304753	1267	0.136206	0.00340782	0.024	0.041	0.0163488	0.0364594	0.0377433	Non-monotone	FALSE	TRUE	FALSE	FALSE	TRUE	TRUE	FALSE	FALSE
orfgcWin54	1267	0.129923	0.00423268	0.098	0.209	0.0997437	0.200317	1267	0.129923	0.00423268	0.094	0.193	0.0906571	0.189487	0.0205615	MIC not significant	FALSE	FALSE	FALSE	FALSE	FALSE	FALSE	FALSE	FALSE
orfgcWin55	1267	0.124872	0.00459717	0.265	0.441	0.269652	0.452896	1267	0.124872	0.00459717	0.219	0.403	0.230889	0.413903	0.0157862	MIC not significant	FALSE	FALSE	FALSE	FALSE	FALSE	FALSE	FALSE	FALSE
orfgcWin56	1267	0.130162	0.00496984	0.108	0.214	0.090227	0.213379	1267	0.130162	0.00496984	0.099	0.22	0.090947	0.21351	0.0120735	MIC not significant	FALSE	FALSE	FALSE	FALSE	FALSE	FALSE	FALSE	FALSE
orfgcWin57	1267	0.12704	0.00628611	0.177	0.408	0.181383	0.426898	1267	0.12704	0.00628611	0.169	0.424	0.181458	0.432808	0.00474573	MIC not significant	FALSE	FALSE	FALSE	FALSE	FALSE	FALSE	FALSE	FALSE
orfgcWin58	1267	0.13784	0.0055075	0.012	0.051	0.00931762	0.0418555	1267	0.13784	0.0055075	0.015	0.048	0.00828214	0.037474	0.00822651	Non-monotone	TRUE	TRUE	FALSE	FALSE	TRUE	TRUE	FALSE	FALSE
orfgcWin59	1267	0.121573	0.00495057	0.404	0.618	0.409417	0.626119	1267	0.121573	0.00495057	0.383	0.612	0.412273	0.627973	0.0122415	MIC not significant	FALSE	FALSE	FALSE	FALSE	FALSE	FALSE	FALSE	FALSE
orfgcWin60	1267	0.120459	0.00621844	0.452	0.737	0.454495	0.736904	1267	0.120459	0.00621844	0.467	0.745	0.475358	0.750438	0.004977	MIC not significant	FALSE	FALSE	FALSE	FALSE	FALSE	FALSE	FALSE	FALSE
orfgcWin61	1267	0.126533	0.00689533	0.191	0.439	0.19189	0.47594	1267	0.126533	0.00689533	0.168	0.441	0.16559	0.441438	0.00309713	MIC not significant	FALSE	FALSE	FALSE	FALSE	FALSE	FALSE	FALSE	FALSE
orfgcWin62	1267	0.124689	0.00814821	0.288	0.648	0.289614	0.66629	1267	0.124689	0.00814821	0.242	0.599	0.249959	0.617845	0.00129782	MIC not significant	FALSE	FALSE	FALSE	FALSE	FALSE	FALSE	FALSE	FALSE
orfgcWin63	1267	0.125622	0.00697439	0.232	0.53	0.23597	0.551463	1267	0.125622	0.00697439	0.215	0.536	0.227157	0.53513	0.00293086	MIC not significant	FALSE	FALSE	FALSE	FALSE	FALSE	FALSE	FALSE	FALSE
orfgcWin64	1267	0.125013	0.00614465	0.227	0.503	0.24579	0.518656	1267	0.125013	0.00614465	0.266	0.534	0.276692	0.541966	0.00524234	MIC not significant	FALSE	FALSE	FALSE	FALSE	FALSE	FALSE	FALSE	FALSE
orfgcWin65	1267	0.126033	0.00695811	0.206	0.524	0.225698	0.520376	1267	0.126033	0.00695811	0.203	0.491	0.214609	0.513612	0.00296435	MIC not significant	FALSE	FALSE	FALSE	FALSE	FALSE	FALSE	FALSE	FALSE
orfgcWin66	1267	0.126692	0.0075042	0.176	0.486	0.184034	0.503482	1267	0.126692	0.0075042	0.19	0.516	0.209337	0.532045	0.00202708	MIC not significant	FALSE	FALSE	FALSE	FALSE	FALSE	FALSE	FALSE	FALSE
orfgcWin67	1267	0.129269	0.00846967	0.115	0.428	0.11228	0.433566	1267	0.129269	0.00846967	0.104	0.409	0.111546	0.425238	0.00103969	MIC not significant	FALSE	FALSE	FALSE	FALSE	FALSE	FALSE	FALSE	FALSE
orfgcWin68	1267	0.125917	0.00959911	0.206	0.627	0.208861	0.638894	1267	0.125917	0.00959911	0.229	0.636	0.228468	0.658915	0.000478738	MIC not significant	FALSE	FALSE	FALSE	FALSE	FALSE	FALSE	FALSE	FALSE
orfgcWin69	1267	0.122765	0.0109929	0.357	0.847	0.364909	0.84631	1267	0.122765	0.0109929	0.318	0.82	0.331573	0.819208	0.000185006	MIC not significant	FALSE	FALSE	FALSE	FALSE	FALSE	FALSE	FALSE	FALSE
orfgcWin70	1267	0.131409	0.0101011	0.075	0.385	0.0725294	0.397264	1267	0.131409	0.0101011	0.059	0.355	0.054052	0.373518	0.000339695	MIC not significant	FALSE	FALSE	FALSE	FALSE	FALSE	FALSE	FALSE	FALSE
orfgcWin71	1267	0.128876	0.0111286	0.132	0.576	0.129126	0.591914	1267	0.128876	0.0111286	0.112	0.557	0.108383	0.566354	0.000168706	MIC not significant	FALSE	FALSE	FALSE	FALSE	FALSE	FALSE	FALSE	FALSE
orfgcWin72	1267	0.131034	0.0119974	0.081	0.528	0.0798054	0.522994	1267	0.131034	0.0119974	0.095	0.495	0.0769582	0.515755	9.35567e-05	MIC not significant	FALSE	FALSE	FALSE	FALSE	FALSE	FALSE	FALSE	FALSE
orfgcWin73	1267	0.136698	0.013309	0.018	0.291	0.0138967	0.296303	1267	0.136698	0.013309	0.023	0.286	0.0152602	0.289805	3.85344e-05	non-significant monotone/non-monotone	FALSE	TRUE	FALSE	FALSE	TRUE	TRUE	FALSE	FALSE
orfgcWin74	1267	0.119485	0.0130861	0.516	0.966	0.530808	0.95339	1267	0.119485	0.0130861	0.52	0.973	0.544258	0.961474	4.47942e-05	MIC not significant	FALSE	FALSE	FALSE	FALSE	FALSE	FALSE	FALSE	FALSE
orfgcWin75	1267	0.126207	0.0124262	0.213	0.757	0.204123	0.768944	1267	0.126207	0.0124262	0.192	0.745	0.200022	0.766434	6.99788e-05	MIC not significant	FALSE	FALSE	FALSE	FALSE	FALSE	FALSE	FALSE	FALSE
orfgcWin76	1267	0.129369	0.0144548	0.11	0.693	0.106227	0.700024	1267	0.129369	0.0144548	0.103	0.717	0.102124	0.722925	1.77979e-05	MIC not significant	FALSE	FALSE	FALSE	FALSE	FALSE	FALSE	FALSE	FALSE
orfgcWin77	1267	0.133565	0.0143788	0.043	0.514	0.0347802	0.521608	1267	0.133565	0.0143788	0.042	0.476	0.0363831	0.500225	1.87326e-05	non-significant monotone/non-monotone	FALSE	FALSE	FALSE	FALSE	FALSE	FALSE	FALSE	FALSE
orfgcWin78	1267	0.130715	0.0153408	0.08	0.696	0.0773744	0.70321	1267	0.130715	0.0153408	0.089	0.684	0.0824854	0.696357	9.80618e-06	MIC not significant	FALSE	FALSE	FALSE	FALSE	FALSE	FALSE	FALSE	FALSE
orfgcWin79	1267	0.137071	0.0162956	0.019	0.415	0.0097721	0.42329	1267	0.137071	0.0162956	0.014	0.404	0.0109623	0.411962	5.16381e-06	non-significant monotone/non-monotone	FALSE	TRUE	FALSE	FALSE	TRUE	TRUE	FALSE	FALSE
orfgcWin80	1267	0.137307	0.0129531	0.012	0.231	0.0106843	0.249041	1267	0.137307	0.0129531	0.013	0.223	0.00926913	0.237995	4.90064e-05	non-significant monotone/non-monotone	TRUE	TRUE	FALSE	FALSE	TRUE	TRUE	FALSE	FALSE
orfgcWin81	1267	0.131024	0.0111359	0.094	0.494	0.0809224	0.491938	1267	0.131024	0.0111359	0.081	0.436	0.0721384	0.462278	0.000167875	MIC not significant	FALSE	FALSE	FALSE	FALSE	FALSE	FALSE	FALSE	FALSE
orfgcWin82	1267	0.130413	0.0118548	0.091	0.523	0.0860811	0.546943	1267	0.130413	0.0118548	0.095	0.553	0.088637	0.559944	0.000103054	MIC not significant	FALSE	FALSE	FALSE	FALSE	FALSE	FALSE	FALSE	FALSE
orfgcWin83	1267	0.127429	0.0122286	0.163	0.709	0.170245	0.709807	1267	0.127429	0.0122286	0.172	0.689	0.161561	0.711291	7.99974e-05	MIC not significant	FALSE	FALSE	FALSE	FALSE	FALSE	FALSE	FALSE	FALSE
orfgcWin84	1267	0.120119	0.0107235	0.505	0.905	0.500031	0.907122	1267	0.120119	0.0107235	0.48	0.903	0.481546	0.901236	0.000222235	MIC not significant	FALSE	FALSE	FALSE	FALSE	FALSE	FALSE	FALSE	FALSE
orfgcWin85	1267	0.121983	0.0128647	0.373	0.91	0.390411	0.901486	1267	0.121983	0.0128647	0.399	0.917	0.404603	0.91163	5.20204e-05	MIC not significant	FALSE	FALSE	FALSE	FALSE	FALSE	FALSE	FALSE	FALSE
orfgcWin86	1267	0.119186	0.0125294	0.53	0.972	0.561485	0.955512	1267	0.119186	0.0125294	0.536	0.96	0.543501	0.958525	6.52603e-05	MIC not significant	FALSE	FALSE	FALSE	FALSE	FALSE	FALSE	FALSE	FALSE
orfgcWin87	1267	0.122947	0.013945	0.324	0.914	0.339867	0.90955	1267	0.122947	0.013945	0.353	0.924	0.366806	0.926306	2.50923e-05	MIC not significant	FALSE	FALSE	FALSE	FALSE	FALSE	FALSE	FALSE	FALSE
orfgcWin88	1267	0.122322	0.0142202	0.383	0.934	0.39438	0.93507	1267	0.122322	0.0142202	0.372	0.937	0.38887	0.929552	2.08446e-05	MIC not significant	FALSE	FALSE	FALSE	FALSE	FALSE	FALSE	FALSE	FALSE
orfgcWin89	1267	0.131066	0.0130521	0.062	0.552	0.0683662	0.56601	1267	0.131066	0.0130521	0.074	0.551	0.0703465	0.574742	4.58348e-05	MIC not significant	FALSE	FALSE	FALSE	FALSE	FALSE	FALSE	FALSE	FALSE
orfgcWin90	1267	0.128008	0.0161957	0.155	0.851	0.159993	0.84042	1267	0.128008	0.0161957	0.129	0.852	0.138265	0.851259	5.52209e-06	MIC not significant	FALSE	FALSE	FALSE	FALSE	FALSE	FALSE	FALSE	FALSE
orfgcWin91	1267	0.129677	0.0195319	0.109	0.887	0.107269	0.879513	1267	0.129677	0.0195319	0.109	0.879	0.0968467	0.880116	5.90677e-07	MIC not significant	FALSE	FALSE	FALSE	FALSE	FALSE	FALSE	FALSE	FALSE
orfgcWin92	1267	0.131846	0.0179321	0.061	0.746	0.0544501	0.749576	1267	0.131846	0.0179321	0.061	0.774	0.0626405	0.773429	1.7235e-06	MIC not significant	FALSE	FALSE	FALSE	FALSE	FALSE	FALSE	FALSE	FALSE
orfgcWin93	1267	0.122193	0.0183947	0.353	0.987	0.373218	0.981195	1267	0.122193	0.0183947	0.339	0.988	0.361918	0.981952	1.26438e-06	MIC not significant	FALSE	FALSE	FALSE	FALSE	FALSE	FALSE	FALSE	FALSE
orfgcWin94	1267	0.118806	0.0168349	0.555	0.995	0.569147	0.988906	1267	0.118806	0.0168349	0.526	0.994	0.562453	0.988211	3.59607e-06	MIC not significant	FALSE	FALSE	FALSE	FALSE	FALSE	FALSE	FALSE	FALSE
orfgcWin95	1267	0.114191	0.0137599	0.775	0.999	0.780532	0.993072	1267	0.114191	0.0137599	0.775	0.999	0.780217	0.994006	2.84265e-05	MIC not significant	FALSE	FALSE	FALSE	FALSE	FALSE	FALSE	FALSE	FALSE
orfgcWin96	1267	0.119009	0.0154788	0.552	0.987	0.565676	0.981134	1267	0.119009	0.0154788	0.551	0.988	0.562611	0.983184	8.93784e-06	MIC not significant	FALSE	FALSE	FALSE	FALSE	FALSE	FALSE	FALSE	FALSE
orfgcWin97	1267	0.124958	0.0160686	0.25	0.913	0.253446	0.913856	1267	0.124958	0.0160686	0.239	0.926	0.236032	0.920536	6.01401e-06	MIC not significant	FALSE	FALSE	FALSE	FALSE	FALSE	FALSE	FALSE	FALSE
orfgcWin98	1267	0.124775	0.0185563	0.271	0.965	0.267339	0.960752	1267	0.124775	0.0185563	0.241	0.959	0.252127	0.953448	1.13473e-06	MIC not significant	FALSE	FALSE	FALSE	FALSE	FALSE	FALSE	FALSE	FALSE
orfgcWin99	1267	0.119094	0.0206463	0.558	1	0.563402	0.997606	1267	0.119094	0.0206463	0.539645	0.999197	0.555217	0.997348	2.80349e-07	MIC not significant	FALSE	FALSE	FALSE	FALSE	FALSE	FALSE	FALSE	FALSE
orfgcWin100	1267	0.125178	0.0168773	0.234	0.919	0.24928	0.913589	1267	0.125178	0.0168773	0.232	0.938	0.229912	0.932603	3.49517e-06	MIC not significant	FALSE	FALSE	FALSE	FALSE	FALSE	FALSE	FALSE	FALSE
orfmeanFEWin1	1267	0.11774	0.00256746	0.639	0.707	0.628092	0.713771	1267	0.11774	0.00256746	0.622	0.695	0.631597	0.711757	0.0713915	MIC not significant	FALSE	FALSE	FALSE	FALSE	FALSE	FALSE	FALSE	FALSE
orfmeanFEWin2	1267	0.125845	0.0036307	0.233	0.346	0.241049	0.369835	1267	0.125845	0.0036307	0.227	0.319	0.218249	0.344816	0.0319837	MIC not significant	FALSE	FALSE	FALSE	FALSE	FALSE	FALSE	FALSE	FALSE
orfmeanFEWin3	1267	0.131215	0.00321822	0.083	0.138	0.0799142	0.137651	1267	0.131215	0.00321822	0.068	0.118	0.0681758	0.121327	0.0434965	MIC not significant	FALSE	FALSE	FALSE	FALSE	FALSE	FALSE	FALSE	FALSE
orfmeanFEWin4	1267	0.137256	0.0018829	0.017	0.019	0.0108582	0.015684	1267	0.137256	0.0018829	0.016	0.024	0.0125266	0.0173794	0.122648	Non-monotone	FALSE	TRUE	FALSE	FALSE	TRUE	TRUE	FALSE	FALSE
orfmeanFEWin5	1267	0.141227	0.00127901	0.003	0.004	0.00234762	0.00285132	1267	0.141227	0.00127901	0.00506579	0.00571053	0.00244968	0.00298591	0.203323	Non-monotone	TRUE	TRUE	FALSE	FALSE	TRUE	TRUE	FALSE	FALSE
orfmeanFEWin6	1267	0.137165	0.00210263	0.014	0.019	0.012409	0.0195345	1267	0.137165	0.00210263	0.015	0.023	0.0125679	0.0191626	0.102799	Non-monotone	FALSE	TRUE	FALSE	FALSE	TRUE	TRUE	FALSE	FALSE
orfmeanFEWin7	1267	0.13695	0.00362106	0.013	0.03	0.0109178	0.0268115	1267	0.13695	0.00362106	0.011	0.033	0.0100055	0.0267142	0.0322126	Non-monotone	TRUE	TRUE	FALSE	FALSE	TRUE	TRUE	FALSE	FALSE
orfmeanFEWin8	1267	0.13997	0.00268032	0.007	0.012	0.00432213	0.00872022	1267	0.13997	0.00268032	0.01	0.017	0.00512195	0.0099115	0.0654412	Non-monotone	TRUE	TRUE	FALSE	FALSE	TRUE	TRUE	FALSE	FALSE
orfmeanFEWin9	1267	0.137658	0.0022378	0.013	0.019	0.00819614	0.0129868	1267	0.137658	0.0022378	0.011	0.023	0.0103898	0.0168096	0.0923536	Non-monotone	TRUE	TRUE	FALSE	FALSE	TRUE	TRUE	FALSE	FALSE
orfmeanFEWin10	1267	0.135624	0.00179611	0.021	0.028	0.0202446	0.0288758	1267	0.135624	0.00179611	0.02	0.03	0.0149232	0.0217303	0.131626	Non-monotone	FALSE	TRUE	FALSE	FALSE	FALSE	TRUE	FALSE	FALSE
orfmeanFEWin11	1267	0.131268	0.00201583	0.082	0.106	0.0802201	0.107108	1267	0.131268	0.00201583	0.066	0.096	0.0593529	0.0845227	0.110184	MIC not significant	FALSE	FALSE	FALSE	FALSE	FALSE	FALSE	FALSE	FALSE
orfmeanFEWin12	1267	0.131712	0.00247234	0.063	0.096	0.0601953	0.0918518	1267	0.131712	0.00247234	0.086	0.113	0.079905	0.116932	0.0768568	MIC not significant	FALSE	FALSE	FALSE	FALSE	FALSE	FALSE	FALSE	FALSE
orfmeanFEWin13	1267	0.13086	0.00269386	0.071	0.122	0.0758141	0.119655	1267	0.13086	0.00269386	0.093	0.133	0.0887785	0.13328	0.0647639	MIC not significant	FALSE	FALSE	FALSE	FALSE	FALSE	FALSE	FALSE	FALSE
orfmeanFEWin14	1267	0.124132	0.00303439	0.287	0.39	0.302748	0.410103	1267	0.124132	0.00303439	0.269	0.378	0.288236	0.396167	0.0499593	MIC not significant	FALSE	FALSE	FALSE	FALSE	FALSE	FALSE	FALSE	FALSE
orfmeanFEWin15	1267	0.122703	0.00289933	0.365	0.457	0.370266	0.479476	1267	0.122703	0.00289933	0.39	0.48	0.390887	0.498518	0.0553492	MIC not significant	FALSE	FALSE	FALSE	FALSE	FALSE	FALSE	FALSE	FALSE
orfmeanFEWin16	1267	0.131448	0.00365912	0.069	0.125	0.068354	0.131113	1267	0.131448	0.00365912	0.058	0.118	0.0543524	0.114276	0.0313181	MIC not significant	FALSE	FALSE	FALSE	FALSE	FALSE	FALSE	FALSE	FALSE
orfmeanFEWin17	1267	0.129276	0.00270354	0.115	0.165	0.104862	0.162497	1267	0.129276	0.00270354	0.108	0.166	0.106061	0.16227	0.0642841	MIC not significant	FALSE	FALSE	FALSE	FALSE	FALSE	FALSE	FALSE	FALSE
orfmeanFEWin18	1267	0.129399	0.00234552	0.116	0.161	0.114193	0.159983	1267	0.129399	0.00234552	0.125	0.156	0.112837	0.1554	0.0848536	MIC not significant	FALSE	FALSE	FALSE	FALSE	FALSE	FALSE	FALSE	FALSE
orfmeanFEWin19	1267	0.123426	0.00373344	0.303	0.459	0.318247	0.475059	1267	0.123426	0.00373344	0.298	0.441	0.305212	0.45722	0.0296449	MIC not significant	FALSE	FALSE	FALSE	FALSE	FALSE	FALSE	FALSE	FALSE
orfmeanFEWin20	1267	0.12428	0.00371792	0.295	0.438	0.292744	0.440155	1267	0.12428	0.00371792	0.292	0.432	0.300217	0.44054	0.0299864	MIC not significant	FALSE	FALSE	FALSE	FALSE	FALSE	FALSE	FALSE	FALSE
orfmeanFEWin21	1267	0.119219	0.00348059	0.57	0.696	0.571961	0.706508	1267	0.119219	0.00348059	0.511	0.662	0.53927	0.680931	0.0357523	MIC not significant	FALSE	FALSE	FALSE	FALSE	FALSE	FALSE	FALSE	FALSE
orfmeanFEWin22	1267	0.123747	0.00312955	0.305	0.427	0.319153	0.437652	1267	0.123747	0.00312955	0.289	0.419	0.316162	0.435622	0.0464963	MIC not significant	FALSE	FALSE	FALSE	FALSE	FALSE	FALSE	FALSE	FALSE
orfmeanFEWin23	1267	0.129201	0.00300423	0.117	0.165	0.114677	0.182176	1267	0.129201	0.00300423	0.118	0.175	0.109261	0.172929	0.0511131	MIC not significant	FALSE	FALSE	FALSE	FALSE	FALSE	FALSE	FALSE	FALSE
orfmeanFEWin24	1267	0.129461	0.00438474	0.108	0.211	0.108502	0.221304	1267	0.129461	0.00438474	0.115	0.236	0.112885	0.230794	0.0184101	MIC not significant	FALSE	FALSE	FALSE	FALSE	FALSE	FALSE	FALSE	FALSE
orfmeanFEWin25	1267	0.133604	0.00517308	0.037	0.119	0.0337991	0.109988	1267	0.133604	0.00517308	0.041	0.128	0.041305	0.123903	0.0104394	non-significant monotone/non-monotone	FALSE	FALSE	FALSE	FALSE	FALSE	FALSE	FALSE	FALSE
orfmeanFEWin26	1267	0.13468	0.00327119	0.032	0.062	0.027683	0.0541718	1267	0.13468	0.00327119	0.036	0.06	0.0260874	0.0535704	0.0418022	non-significant monotone/non-monotone	FALSE	FALSE	FALSE	FALSE	FALSE	TRUE	FALSE	FALSE
orfmeanFEWin27	1267	0.124863	0.00255741	0.257	0.332	0.268659	0.350577	1267	0.124863	0.00255741	0.269	0.343	0.269094	0.35356	0.0719489	MIC not significant	FALSE	FALSE	FALSE	FALSE	FALSE	FALSE	FALSE	FALSE
orfmeanFEWin28	1267	0.124726	0.00269563	0.261	0.33	0.265268	0.352575	1267	0.124726	0.00269563	0.249	0.342	0.269451	0.36044	0.0646757	MIC not significant	FALSE	FALSE	FALSE	FALSE	FALSE	FALSE	FALSE	FALSE
orfmeanFEWin29	1267	0.119567	0.00163731	0.528	0.577	0.541447	0.584047	1267	0.119567	0.00163731	0.546	0.588	0.557545	0.601454	0.150017	MIC not significant	FALSE	FALSE	FALSE	FALSE	FALSE	FALSE	FALSE	FALSE
orfmeanFEWin30	1267	0.122637	0.00171258	0.369	0.411	0.379899	0.427005	1267	0.122637	0.00171258	0.351	0.39	0.365965	0.415271	0.140963	MIC not significant	FALSE	FALSE	FALSE	FALSE	FALSE	FALSE	FALSE	FALSE
orfmeanFEWin31	1267	0.120361	0.00142887	0.464	0.503	0.500442	0.534853	1267	0.120361	0.00142887	0.476	0.506	0.487737	0.519663	0.178737	MIC not significant	FALSE	FALSE	FALSE	FALSE	FALSE	FALSE	FALSE	FALSE
orfmeanFEWin32	1267	0.124657	0.000622231	0.275	0.272	0.279476	0.271453	1267	0.124657	0.000622231	0.282	0.265	0.28435	0.273924	0.374992	MIC not significant	FALSE	FALSE	FALSE	FALSE	FALSE	FALSE	FALSE	FALSE
orfmeanFEWin33	1267	0.125455	0.000666837	0.232	0.232	0.243256	0.238989	1267	0.125455	0.000666837	0.231	0.221	0.227068	0.220133	0.358399	MIC not significant	FALSE	FALSE	FALSE	FALSE	FALSE	FALSE	FALSE	FALSE
orfmeanFEWin34	1267	0.129924	0.000696812	0.09	0.089	0.0896959	0.0849924	1267	0.129924	0.000696812	0.1	0.1	0.0971376	0.095914	0.347811	MIC not significant	FALSE	FALSE	FALSE	FALSE	FALSE	FALSE	FALSE	FALSE
orfmeanFEWin35	1267	0.117892	0.000575951	0.607	0.594	0.624906	0.613767	1267	0.117892	0.000575951	0.606	0.597	0.619503	0.609793	0.39337	MIC not significant	FALSE	FALSE	FALSE	FALSE	FALSE	FALSE	FALSE	FALSE
orfmeanFEWin36	1267	0.121182	0.000526662	0.406	0.394	0.43835	0.42434	1267	0.121182	0.000526662	0.445	0.428	0.453842	0.440828	0.414401	MIC not significant	FALSE	FALSE	FALSE	FALSE	FALSE	FALSE	FALSE	FALSE
orfmeanFEWin37	1267	0.118259	0.000871967	0.596	0.607	0.605469	0.611956	1267	0.118259	0.000871967	0.581	0.589	0.60893	0.613617	0.29359	MIC not significant	FALSE	FALSE	FALSE	FALSE	FALSE	FALSE	FALSE	FALSE
orfmeanFEWin38	1267	0.121405	0.000771147	0.424	0.426	0.442538	0.441299	1267	0.121405	0.000771147	0.424	0.425	0.439085	0.436521	0.323315	MIC not significant	FALSE	FALSE	FALSE	FALSE	FALSE	FALSE	FALSE	FALSE
orfmeanFEWin39	1267	0.121259	0.000941957	0.449	0.456	0.454342	0.464146	1267	0.121259	0.000941957	0.445	0.445	0.460207	0.46641	0.274994	MIC not significant	FALSE	FALSE	FALSE	FALSE	FALSE	FALSE	FALSE	FALSE
orfmeanFEWin40	1267	0.121665	0.000827322	0.393	0.397	0.416567	0.417662	1267	0.121665	0.000827322	0.413	0.41	0.423598	0.421369	0.306296	MIC not significant	FALSE	FALSE	FALSE	FALSE	FALSE	FALSE	FALSE	FALSE
orfmeanFEWin41	1267	0.113922	0.000573174	0.787	0.781	0.797585	0.789582	1267	0.113922	0.000573174	0.785	0.781	0.795912	0.788514	0.394513	MIC not significant	FALSE	FALSE	FALSE	FALSE	FALSE	FALSE	FALSE	FALSE
orfmeanFEWin42	1267	0.12764	0.00119401	0.156	0.169	0.156725	0.17157	1267	0.12764	0.00119401	0.162	0.17	0.168831	0.180644	0.219028	MIC not significant	FALSE	FALSE	FALSE	FALSE	FALSE	FALSE	FALSE	FALSE
orfmeanFEWin43	1267	0.128879	0.00212847	0.125	0.164	0.109773	0.147554	1267	0.128879	0.00212847	0.123	0.161	0.117692	0.15766	0.100706	MIC not significant	FALSE	FALSE	FALSE	FALSE	FALSE	FALSE	FALSE	FALSE
orfmeanFEWin44	1267	0.12635	0.00104683	0.196	0.208	0.199348	0.207628	1267	0.12635	0.00104683	0.188	0.188	0.188392	0.199113	0.249803	MIC not significant	FALSE	FALSE	FALSE	FALSE	FALSE	FALSE	FALSE	FALSE
orfmeanFEWin45	1267	0.119919	0.000961133	0.496	0.504	0.518941	0.527315	1267	0.119919	0.000961133	0.509	0.51	0.529045	0.537167	0.270159	MIC not significant	FALSE	FALSE	FALSE	FALSE	FALSE	FALSE	FALSE	FALSE
orfmeanFEWin46	1267	0.128034	0.000940642	0.159	0.168	0.157543	0.164082	1267	0.128034	0.000940642	0.152	0.156	0.149018	0.153852	0.275329	MIC not significant	FALSE	FALSE	FALSE	FALSE	FALSE	FALSE	FALSE	FALSE
orfmeanFEWin47	1267	0.126424	0.00173391	0.182	0.223	0.18931	0.223274	1267	0.126424	0.00173391	0.217	0.233	0.216659	0.254735	0.13851	MIC not significant	FALSE	FALSE	FALSE	FALSE	FALSE	FALSE	FALSE	FALSE
orfmeanFEWin48	1267	0.122481	0.00133893	0.342	0.374	0.378692	0.405843	1267	0.122481	0.00133893	0.36	0.396	0.381316	0.409678	0.193046	MIC not significant	FALSE	FALSE	FALSE	FALSE	FALSE	FALSE	FALSE	FALSE
orfmeanFEWin49	1267	0.115673	0.000905575	0.722	0.739	0.728349	0.734558	1267	0.115673	0.000905575	0.709	0.716	0.722454	0.730901	0.284468	MIC not significant	FALSE	FALSE	FALSE	FALSE	FALSE	FALSE	FALSE	FALSE
orfmeanFEWin50	1267	0.118724	0.000696825	0.582	0.57	0.585514	0.578123	1267	0.118724	0.000696825	0.562	0.557	0.577427	0.572113	0.347807	MIC not significant	FALSE	FALSE	FALSE	FALSE	FALSE	FALSE	FALSE	FALSE
orfmeanFEWin51	1267	0.127171	0.00075699	0.187	0.192	0.187674	0.188768	1267	0.127171	0.00075699	0.167	0.164	0.167232	0.169032	0.327798	MIC not significant	FALSE	FALSE	FALSE	FALSE	FALSE	FALSE	FALSE	FALSE
orfmeanFEWin52	1267	0.118219	0.000761173	0.584	0.583	0.605239	0.60257	1267	0.118219	0.000761173	0.597	0.591	0.610482	0.610491	0.326465	MIC not significant	FALSE	FALSE	FALSE	FALSE	FALSE	FALSE	FALSE	FALSE
orfmeanFEWin53	1267	0.119219	0.00195864	0.521	0.602	0.538461	0.598365	1267	0.119219	0.00195864	0.525	0.584	0.536193	0.600645	0.115366	MIC not significant	FALSE	FALSE	FALSE	FALSE	FALSE	FALSE	FALSE	FALSE
orfmeanFEWin54	1267	0.119326	0.00207988	0.525	0.602	0.551075	0.619197	1267	0.119326	0.00207988	0.504	0.584	0.533273	0.601086	0.10468	MIC not significant	FALSE	FALSE	FALSE	FALSE	FALSE	FALSE	FALSE	FALSE
orfmeanFEWin55	1267	0.120179	0.00179228	0.499	0.561	0.522908	0.57785	1267	0.120179	0.00179228	0.441	0.498	0.470817	0.525375	0.132039	MIC not significant	FALSE	FALSE	FALSE	FALSE	FALSE	FALSE	FALSE	FALSE
orfmeanFEWin56	1267	0.105818	0.00105905	0.979	0.977	0.976579	0.978361	1267	0.105818	0.00105905	0.98	0.98	0.968269	0.969963	0.247056	MIC not significant	FALSE	FALSE	FALSE	FALSE	FALSE	FALSE	FALSE	FALSE
orfmeanFEWin57	1267	0.105322	0.000607323	0.98	0.977	0.972968	0.972021	1267	0.105322	0.000607323	0.992	0.989	0.980623	0.979184	0.380777	MIC not significant	FALSE	FALSE	FALSE	FALSE	FALSE	FALSE	FALSE	FALSE
orfmeanFEWin58	1267	0.109215	0.000488288	0.932	0.933	0.924162	0.917636	1267	0.109215	0.000488288	0.926	0.915	0.920162	0.913519	0.431944	MIC not significant	FALSE	FALSE	FALSE	FALSE	FALSE	FALSE	FALSE	FALSE
orfmeanFEWin59	1267	0.110201	5.29621e-05	0.912	0.886	0.898449	0.87707	1267	0.110201	5.29621e-05	0.913	0.894	0.907415	0.889791	0.795797	MIC not significant	FALSE	FALSE	FALSE	FALSE	FALSE	FALSE	FALSE	FALSE
orfmeanFEWin60	1267	0.11493	1.78073e-05	0.75	0.712	0.761472	0.726001	1267	0.11493	1.78073e-05	0.755	0.725	0.766949	0.733897	0.880719	MIC not significant	FALSE	FALSE	FALSE	FALSE	FALSE	FALSE	FALSE	FALSE
orfmeanFEWin61	1267	0.114143	0.000108903	0.79	0.76	0.792343	0.765375	1267	0.114143	0.000108903	0.789	0.751	0.798912	0.768962	0.710562	MIC not significant	FALSE	FALSE	FALSE	FALSE	FALSE	FALSE	FALSE	FALSE
orfmeanFEWin62	1267	0.111031	1.95381e-05	0.881	0.862	0.88012	0.860577	1267	0.111031	1.95381e-05	0.887	0.864	0.881304	0.858317	0.875102	MIC not significant	FALSE	FALSE	FALSE	FALSE	FALSE	FALSE	FALSE	FALSE
orfmeanFEWin63	1267	0.114466	1.58098e-05	0.764	0.735	0.780305	0.74956	1267	0.114466	1.58098e-05	0.756	0.725	0.759767	0.731281	0.887561	MIC not significant	FALSE	FALSE	FALSE	FALSE	FALSE	FALSE	FALSE	FALSE
orfmeanFEWin64	1267	0.117935	4.98079e-06	0.627	0.603	0.636222	0.597199	1267	0.117935	4.98079e-06	0.597	0.556	0.614436	0.572667	0.936745	MIC not significant	FALSE	FALSE	FALSE	FALSE	FALSE	FALSE	FALSE	FALSE
orfmeanFEWin65	1267	0.123552	1.27717e-05	0.332	0.297	0.333937	0.299402	1267	0.123552	1.27717e-05	0.329	0.295	0.326544	0.28828	0.898875	MIC not significant	FALSE	FALSE	FALSE	FALSE	FALSE	FALSE	FALSE	FALSE
orfmeanFEWin66	1267	0.113543	0.000142584	0.799	0.776	0.807619	0.780723	1267	0.113543	0.000142584	0.809	0.779	0.805391	0.781497	0.671106	MIC not significant	FALSE	FALSE	FALSE	FALSE	FALSE	FALSE	FALSE	FALSE
orfmeanFEWin67	1267	0.111834	0.000432076	0.866	0.86	0.87019	0.860094	1267	0.111834	0.000432076	0.858	0.849	0.85935	0.849555	0.45976	MIC not significant	FALSE	FALSE	FALSE	FALSE	FALSE	FALSE	FALSE	FALSE
orfmeanFEWin68	1267	0.110273	0.000462853	0.901	0.897	0.895727	0.88883	1267	0.110273	0.000462853	0.92	0.91	0.909604	0.902801	0.444199	MIC not significant	FALSE	FALSE	FALSE	FALSE	FALSE	FALSE	FALSE	FALSE
orfmeanFEWin69	1267	0.11924	0.000905544	0.532	0.533	0.538778	0.545295	1267	0.11924	0.000905544	0.522	0.525	0.543329	0.551149	0.284476	MIC not significant	FALSE	FALSE	FALSE	FALSE	FALSE	FALSE	FALSE	FALSE
orfmeanFEWin70	1267	0.115696	0.00120321	0.711	0.74	0.719674	0.740256	1267	0.115696	0.00120321	0.716	0.737	0.738924	0.755674	0.21726	MIC not significant	FALSE	FALSE	FALSE	FALSE	FALSE	FALSE	FALSE	FALSE
orfmeanFEWin71	1267	0.116349	0.00144298	0.668	0.713	0.678776	0.710077	1267	0.116349	0.00144298	0.666	0.701	0.683597	0.714066	0.176605	MIC not significant	FALSE	FALSE	FALSE	FALSE	FALSE	FALSE	FALSE	FALSE
orfmeanFEWin72	1267	0.108691	0.00107935	0.948	0.955	0.938237	0.942357	1267	0.108691	0.00107935	0.95	0.952	0.943242	0.948216	0.242573	MIC not significant	FALSE	FALSE	FALSE	FALSE	FALSE	FALSE	FALSE	FALSE
orfmeanFEWin73	1267	0.105474	0.00167904	0.98	0.987	0.972636	0.978485	1267	0.105474	0.00167904	0.98	0.988	0.97413	0.980354	0.144919	MIC not significant	FALSE	FALSE	FALSE	FALSE	FALSE	FALSE	FALSE	FALSE
orfmeanFEWin74	1267	0.106238	0.00226226	0.977	0.984	0.971953	0.98257	1267	0.106238	0.00226226	0.978	0.988	0.96426	0.977929	0.0905891	MIC not significant	FALSE	FALSE	FALSE	FALSE	FALSE	FALSE	FALSE	FALSE
orfmeanFEWin75	1267	0.113068	0.0019992	0.823	0.862	0.820243	0.861519	1267	0.113068	0.0019992	0.81	0.857	0.817806	0.859	0.111663	MIC not significant	FALSE	FALSE	FALSE	FALSE	FALSE	FALSE	FALSE	FALSE
orfmeanFEWin76	1267	0.119067	0.00208874	0.552	0.625	0.562622	0.630901	1267	0.119067	0.00208874	0.524	0.594	0.551132	0.62023	0.103943	MIC not significant	FALSE	FALSE	FALSE	FALSE	FALSE	FALSE	FALSE	FALSE
orfmeanFEWin77	1267	0.125893	0.00123698	0.22	0.231	0.221907	0.239609	1267	0.125893	0.00123698	0.232	0.247	0.23311	0.251197	0.210915	MIC not significant	FALSE	FALSE	FALSE	FALSE	FALSE	FALSE	FALSE	FALSE
orfmeanFEWin78	1267	0.118716	0.00105865	0.564	0.58	0.574557	0.589595	1267	0.118716	0.00105865	0.546	0.553	0.575537	0.586491	0.247145	MIC not significant	FALSE	FALSE	FALSE	FALSE	FALSE	FALSE	FALSE	FALSE
orfmeanFEWin79	1267	0.118912	0.00150271	0.548	0.591	0.551785	0.586873	1267	0.118912	0.00150271	0.556	0.603	0.56368	0.599893	0.167898	MIC not significant	FALSE	FALSE	FALSE	FALSE	FALSE	FALSE	FALSE	FALSE
orfmeanFEWin80	1267	0.120503	0.00127368	0.484	0.504	0.495218	0.51865	1267	0.120503	0.00127368	0.458	0.481	0.469725	0.495136	0.204268	MIC not significant	FALSE	FALSE	FALSE	FALSE	FALSE	FALSE	FALSE	FALSE
orfmeanFEWin81	1267	0.11751	0.00164241	0.612	0.682	0.642963	0.683689	1267	0.11751	0.00164241	0.601	0.652	0.616368	0.658852	0.149384	MIC not significant	FALSE	FALSE	FALSE	FALSE	FALSE	FALSE	FALSE	FALSE
orfmeanFEWin82	1267	0.125983	0.00117671	0.223	0.238	0.226807	0.240177	1267	0.125983	0.00117671	0.206	0.223	0.202418	0.219871	0.222399	MIC not significant	FALSE	FALSE	FALSE	FALSE	FALSE	FALSE	FALSE	FALSE
orfmeanFEWin83	1267	0.123665	0.00232589	0.303	0.368	0.30884	0.38096	1267	0.123665	0.00232589	0.314	0.394	0.322886	0.398249	0.0861697	MIC not significant	FALSE	FALSE	FALSE	FALSE	FALSE	FALSE	FALSE	FALSE
orfmeanFEWin84	1267	0.118932	0.00287069	0.532	0.65	0.558698	0.66522	1267	0.118932	0.00287069	0.562	0.667	0.572669	0.673959	0.0565696	MIC not significant	FALSE	FALSE	FALSE	FALSE	FALSE	FALSE	FALSE	FALSE
orfmeanFEWin85	1267	0.133596	0.00276049	0.033	0.058	0.0330797	0.0590178	1267	0.133596	0.00276049	0.047	0.072	0.0382101	0.0646186	0.0615369	non-significant monotone/non-monotone	FALSE	FALSE	FALSE	FALSE	FALSE	FALSE	FALSE	FALSE
orfmeanFEWin86	1267	0.134377	0.00239975	0.043	0.068	0.0351986	0.0547075	1267	0.134377	0.00239975	0.037	0.057	0.0281681	0.0439368	0.0813298	non-significant monotone/non-monotone	FALSE	FALSE	FALSE	FALSE	FALSE	TRUE	FALSE	FALSE
orfmeanFEWin87	1267	0.132507	0.00278631	0.053	0.074	0.044151	0.0734368	1267	0.132507	0.00278631	0.055	0.086	0.0490767	0.081275	0.0603331	MIC not significant	FALSE	FALSE	FALSE	FALSE	FALSE	FALSE	FALSE	FALSE
orfmeanFEWin88	1267	0.12992	0.0032183	0.094	0.171	0.0960208	0.163513	1267	0.12992	0.0032183	0.106	0.174	0.10535	0.174435	0.0434937	MIC not significant	FALSE	FALSE	FALSE	FALSE	FALSE	FALSE	FALSE	FALSE
orfmeanFEWin89	1267	0.125772	0.00293301	0.236	0.311	0.233224	0.330477	1267	0.125772	0.00293301	0.224	0.32	0.230739	0.328358	0.0539501	MIC not significant	FALSE	FALSE	FALSE	FALSE	FALSE	FALSE	FALSE	FALSE
orfmeanFEWin90	1267	0.130125	0.00361223	0.1	0.174	0.096127	0.176544	1267	0.130125	0.00361223	0.105	0.171	0.0888393	0.164077	0.0324241	MIC not significant	FALSE	FALSE	FALSE	FALSE	FALSE	FALSE	FALSE	FALSE
orfmeanFEWin91	1267	0.131035	0.0026362	0.082	0.113	0.0717344	0.114128	1267	0.131035	0.0026362	0.083	0.117	0.0821793	0.124396	0.0677019	MIC not significant	FALSE	FALSE	FALSE	FALSE	FALSE	FALSE	FALSE	FALSE
orfmeanFEWin92	1267	0.135207	0.00197573	0.031	0.044	0.0238004	0.0344528	1267	0.135207	0.00197573	0.029	0.037	0.0209381	0.0299304	0.11379	Non-monotone	FALSE	TRUE	FALSE	FALSE	FALSE	TRUE	FALSE	FALSE
orfmeanFEWin93	1267	0.134093	0.00144831	0.034	0.042	0.0320114	0.0386768	1267	0.134093	0.00144831	0.031	0.045	0.0315262	0.0372397	0.175807	Non-monotone	FALSE	TRUE	FALSE	FALSE	FALSE	TRUE	FALSE	FALSE
orfmeanFEWin94	1267	0.130897	0.00108177	0.082	0.078	0.0774949	0.0817244	1267	0.130897	0.00108177	0.087	0.092	0.0776084	0.0830427	0.242046	MIC not significant	FALSE	FALSE	FALSE	FALSE	FALSE	FALSE	FALSE	FALSE
orfmeanFEWin95	1267	0.137196	0.00152173	0.018	0.02	0.0113789	0.0145462	1267	0.137196	0.00152173	0.019	0.028	0.013833	0.0170502	0.16523	Non-monotone	FALSE	TRUE	FALSE	FALSE	TRUE	TRUE	FALSE	FALSE
orfmeanFEWin96	1267	0.124911	0.00152246	0.246	0.277	0.249655	0.283363	1267	0.124911	0.00152246	0.247	0.278	0.257478	0.293842	0.16513	MIC not significant	FALSE	FALSE	FALSE	FALSE	FALSE	FALSE	FALSE	FALSE
orfmeanFEWin97	1267	0.125174	0.00205108	0.25	0.311	0.274617	0.330233	1267	0.125174	0.00205108	0.239	0.292	0.246218	0.307499	0.107117	MIC not significant	FALSE	FALSE	FALSE	FALSE	FALSE	FALSE	FALSE	FALSE
orfmeanFEWin98	1267	0.116144	0.00274108	0.683	0.775	0.696713	0.779839	1267	0.116144	0.00274108	0.668	0.77	0.684394	0.768655	0.0624588	MIC not significant	FALSE	FALSE	FALSE	FALSE	FALSE	FALSE	FALSE	FALSE
orfmeanFEWin99	1267	0.114094	0.00263097	0.776	0.87	0.793411	0.857542	1267	0.114094	0.00263097	0.79	0.874	0.791993	0.856318	0.0679755	MIC not significant	FALSE	FALSE	FALSE	FALSE	FALSE	FALSE	FALSE	FALSE
orfmeanFEWin100	1267	0.115187	0.00505076	0.779	0.914	0.759039	0.902265	1267	0.115187	0.00505076	0.707	0.878	0.726136	0.877754	0.0113936	MIC not significant	FALSE	FALSE	FALSE	FALSE	FALSE	FALSE	FALSE	FALSE
orftAIWin1	1267	0.11795	0.00105959	0.843	0.862	0.851829	0.860967	1267	0.11795	0.00105959	0.848	0.865	0.842064	0.851851	0.246898	MIC not significant	FALSE	FALSE	FALSE	FALSE	FALSE	FALSE	FALSE	FALSE
orftAIWin2	1267	0.123206	0.00273198	0.523	0.649	0.557961	0.667502	1267	0.123206	0.00273198	0.541	0.664	0.573522	0.689089	0.0629019	MIC not significant	FALSE	FALSE	FALSE	FALSE	FALSE	FALSE	FALSE	FALSE
orftAIWin3	1267	0.118811	0.00024088	0.789	0.758	0.795672	0.770581	1267	0.118811	0.00024088	0.785	0.767	0.800893	0.778262	0.580946	MIC not significant	FALSE	FALSE	FALSE	FALSE	FALSE	FALSE	FALSE	FALSE
orftAIWin4	1267	0.116311	0.00232754	0.893	0.93	0.885687	0.923055	1267	0.116311	0.00232754	0.892	0.954	0.888111	0.926467	0.0860582	MIC not significant	FALSE	FALSE	FALSE	FALSE	FALSE	FALSE	FALSE	FALSE
orftAIWin5	1267	0.13168	0.00505727	0.118	0.267	0.118472	0.306265	1267	0.13168	0.00505727	0.124	0.312	0.129333	0.317196	0.0113539	MIC not significant	FALSE	FALSE	FALSE	FALSE	FALSE	FALSE	FALSE	FALSE
orftAIWin6	1267	0.121475	0.000702692	0.641	0.651	0.659754	0.657786	1267	0.121475	0.000702692	0.659	0.658	0.679305	0.674426	0.345736	MIC not significant	FALSE	FALSE	FALSE	FALSE	FALSE	FALSE	FALSE	FALSE
orftAIWin7	1267	0.132944	0.00529004	0.094	0.237	0.0863145	0.250882	1267	0.132944	0.00529004	0.113	0.271	0.106501	0.285059	0.00960343	MIC not significant	FALSE	FALSE	FALSE	FALSE	FALSE	FALSE	FALSE	FALSE
orftAIWin8	1267	0.122279	0.00353462	0.612	0.779	0.637747	0.781589	1267	0.122279	0.00353462	0.594	0.763	0.626092	0.762509	0.0343576	MIC not significant	FALSE	FALSE	FALSE	FALSE	FALSE	FALSE	FALSE	FALSE
orftAIWin9	1267	0.118411	0.000153036	0.823	0.792	0.823328	0.795149	1267	0.118411	0.000153036	0.828	0.796	0.832202	0.802625	0.659953	MIC not significant	FALSE	FALSE	FALSE	FALSE	FALSE	FALSE	FALSE	FALSE
orftAIWin10	1267	0.126103	0.00967479	0.385	0.866	0.403132	0.865507	1267	0.126103	0.00967479	0.365	0.865	0.385987	0.854543	0.000454576	MIC not significant	FALSE	FALSE	FALSE	FALSE	FALSE	FALSE	FALSE	FALSE
orftAIWin11	1267	0.123489	0.00217817	0.534	0.619	0.563087	0.646618	1267	0.123489	0.00217817	0.526	0.612	0.54992	0.632131	0.0968075	MIC not significant	FALSE	FALSE	FALSE	FALSE	FALSE	FALSE	FALSE	FALSE
orftAIWin12	1267	0.117669	3.44496e-07	0.857	0.821	0.845973	0.818474	1267	0.117669	3.44496e-07	0.849	0.819	0.85261	0.822852	0.983346	MIC not significant	FALSE	FALSE	FALSE	FALSE	FALSE	FALSE	FALSE	FALSE
orftAIWin13	1267	0.137296	0.0113332	0.042	0.357	0.0284561	0.376347	1267	0.137296	0.0113332	0.029	0.325	0.0211465	0.348138	0.000148031	non-significant monotone/non-monotone	FALSE	TRUE	FALSE	FALSE	FALSE	TRUE	FALSE	FALSE
orftAIWin14	1267	0.11557	0.00222236	0.904	0.95	0.89639	0.930399	1267	0.11557	0.00222236	0.918	0.953	0.909106	0.938952	0.0934829	MIC not significant	FALSE	FALSE	FALSE	FALSE	FALSE	FALSE	FALSE	FALSE
orftAIWin15	1267	0.113046	2.70304e-08	0.979	0.962	0.963408	0.951392	1267	0.113046	2.70304e-08	0.974	0.964	0.952755	0.939491	0.995335	MIC not significant	FALSE	FALSE	FALSE	FALSE	FALSE	FALSE	FALSE	FALSE
orftAIWin16	1267	0.140421	0.0123242	0.015	0.246	0.00976653	0.264228	1267	0.140421	0.0123242	0.009	0.264	0.00815886	0.253173	7.57312e-05	non-significant monotone/non-monotone	FALSE	TRUE	FALSE	FALSE	TRUE	TRUE	FALSE	FALSE
orftAIWin17	1267	0.123661	0.00148493	0.54	0.579	0.556598	0.600577	1267	0.123661	0.00148493	0.525	0.559	0.548416	0.586994	0.170415	MIC not significant	FALSE	FALSE	FALSE	FALSE	FALSE	FALSE	FALSE	FALSE
orftAIWin18	1267	0.11773	0.000256828	0.823	0.796	0.824401	0.803061	1267	0.11773	0.000256828	0.855	0.839	0.858412	0.841988	0.568687	MIC not significant	FALSE	FALSE	FALSE	FALSE	FALSE	FALSE	FALSE	FALSE
orftAIWin19	1267	0.134157	0.0112438	0.085	0.526	0.0821874	0.558989	1267	0.134157	0.0112438	0.063	0.51	0.0601278	0.537767	0.000157279	MIC not significant	FALSE	FALSE	FALSE	FALSE	FALSE	FALSE	FALSE	FALSE
orftAIWin20	1267	0.127432	0.00103747	0.303	0.314	0.31005	0.324784	1267	0.127432	0.00103747	0.268	0.273	0.301514	0.314664	0.251894	MIC not significant	FALSE	FALSE	FALSE	FALSE	FALSE	FALSE	FALSE	FALSE
orftAIWin21	1267	0.116372	0.000473286	0.888	0.877	0.888834	0.881907	1267	0.116372	0.000473286	0.892	0.892	0.889285	0.878473	0.439056	MIC not significant	FALSE	FALSE	FALSE	FALSE	FALSE	FALSE	FALSE	FALSE
orftAIWin22	1267	0.132954	0.0102283	0.098	0.526	0.0924155	0.550505	1267	0.132954	0.0102283	0.114	0.513	0.110764	0.552847	0.000313489	MIC not significant	FALSE	FALSE	FALSE	FALSE	FALSE	FALSE	FALSE	FALSE
orftAIWin23	1267	0.128549	0.00125403	0.236	0.25	0.245798	0.26916	1267	0.128549	0.00125403	0.23	0.259	0.264014	0.285169	0.207765	MIC not significant	FALSE	FALSE	FALSE	FALSE	FALSE	FALSE	FALSE	FALSE
orftAIWin24	1267	0.121273	0.00100015	0.691	0.707	0.694513	0.706503	1267	0.121273	0.00100015	0.681	0.694	0.678368	0.691982	0.260606	MIC not significant	FALSE	FALSE	FALSE	FALSE	FALSE	FALSE	FALSE	FALSE
orftAIWin25	1267	0.13241	0.0150051	0.109	0.819	0.0986151	0.818886	1267	0.13241	0.0150051	0.116	0.821	0.117701	0.819982	1.24789e-05	MIC not significant	FALSE	FALSE	FALSE	FALSE	FALSE	FALSE	FALSE	FALSE
orftAIWin26	1267	0.132664	0.000533322	0.108	0.101	0.10277	0.0979315	1267	0.132664	0.000533322	0.11	0.102	0.104293	0.098518	0.411413	MIC not significant	FALSE	FALSE	FALSE	FALSE	FALSE	FALSE	FALSE	FALSE
orftAIWin27	1267	0.125939	0.000643005	0.372	0.375	0.390445	0.385409	1267	0.125939	0.000643005	0.356	0.343	0.387363	0.374751	0.367085	MIC not significant	FALSE	FALSE	FALSE	FALSE	FALSE	FALSE	FALSE	FALSE
orftAIWin28	1267	0.142506	0.0107988	0.007	0.105	0.00281307	0.105716	1267	0.142506	0.0107988	0.008	0.099	0.00247987	0.0980855	0.000212705	non-significant monotone/non-monotone	TRUE	TRUE	FALSE	FALSE	TRUE	TRUE	FALSE	FALSE
orftAIWin29	1267	0.122532	2.35708e-06	0.577	0.538	0.602991	0.553731	1267	0.122532	2.35708e-06	0.592	0.544	0.610232	0.559455	0.956456	MIC not significant	FALSE	FALSE	FALSE	FALSE	FALSE	FALSE	FALSE	FALSE
orftAIWin30	1267	0.125449	0.000320074	0.411	0.383	0.424735	0.391271	1267	0.125449	0.000320074	0.397	0.377	0.429729	0.403856	0.52457	MIC not significant	FALSE	FALSE	FALSE	FALSE	FALSE	FALSE	FALSE	FALSE
orftAIWin31	1267	0.145567	0.0114422	0.003	0.063	0.000427129	0.0493905	1267	0.145567	0.0114422	0.004	0.057	0.000559112	0.0508015	0.000137493	non-significant monotone/non-monotone	TRUE	TRUE	FALSE	FALSE	TRUE	TRUE	FALSE	FALSE
orftAIWin32	1267	0.118634	6.72176e-09	0.814	0.77	0.812078	0.779599	1267	0.118634	6.72176e-09	0.807	0.772	0.808318	0.773646	0.997674	MIC not significant	FALSE	FALSE	FALSE	FALSE	FALSE	FALSE	FALSE	FALSE
orftAIWin33	1267	0.131724	0.000660402	0.128	0.13	0.124693	0.122341	1267	0.131724	0.000660402	0.131	0.129	0.126619	0.120976	0.36068	MIC not significant	FALSE	FALSE	FALSE	FALSE	FALSE	FALSE	FALSE	FALSE
orftAIWin34	1267	0.138323	0.00991902	0.028	0.232	0.0169139	0.231907	1267	0.138323	0.00991902	0.03	0.232	0.0189569	0.244075	0.000387039	non-significant monotone/non-monotone	FALSE	TRUE	FALSE	FALSE	FALSE	TRUE	FALSE	FALSE
orftAIWin35	1267	0.135438	4.82983e-05	0.059	0.049	0.0450839	0.0357165	1267	0.135438	4.82983e-05	0.049	0.042	0.0376373	0.0288273	0.804779	MIC not significant	FALSE	FALSE	FALSE	FALSE	FALSE	FALSE	FALSE	FALSE
orftAIWin36	1267	0.122389	0.000757667	0.591	0.577	0.60925	0.603339	1267	0.122389	0.000757667	0.585	0.588	0.618348	0.619119	0.327535	MIC not significant	FALSE	FALSE	FALSE	FALSE	FALSE	FALSE	FALSE	FALSE
orftAIWin37	1267	0.123277	0.00797151	0.554	0.913	0.574554	0.905627	1267	0.123277	0.00797151	0.538	0.913	0.564563	0.894878	0.0014664	MIC not significant	FALSE	FALSE	FALSE	FALSE	FALSE	FALSE	FALSE	FALSE
orftAIWin38	1267	0.116866	5.68475e-06	0.875	0.846	0.866639	0.841916	1267	0.116866	5.68475e-06	0.875	0.853	0.867959	0.841467	0.932423	MIC not significant	FALSE	FALSE	FALSE	FALSE	FALSE	FALSE	FALSE	FALSE
orftAIWin39	1267	0.110895	0.00116928	0.989	0.991	0.975397	0.979005	1267	0.110895	0.00116928	0.982	0.984	0.972115	0.976337	0.223831	MIC not significant	FALSE	FALSE	FALSE	FALSE	FALSE	FALSE	FALSE	FALSE
orftAIWin40	1267	0.125226	0.00844664	0.432	0.847	0.453784	0.847528	1267	0.125226	0.00844664	0.417	0.877	0.453284	0.853384	0.00106082	MIC not significant	FALSE	FALSE	FALSE	FALSE	FALSE	FALSE	FALSE	FALSE
orftAIWin41	1267	0.11619	3.67408e-07	0.89	0.86	0.890497	0.863085	1267	0.11619	3.67408e-07	0.92	0.892	0.903316	0.879567	0.982801	MIC not significant	FALSE	FALSE	FALSE	FALSE	FALSE	FALSE	FALSE	FALSE
orftAIWin42	1267	0.120919	0.00143972	0.677	0.716	0.686058	0.720407	1267	0.120919	0.00143972	0.717	0.738	0.723823	0.758636	0.17707	MIC not significant	FALSE	FALSE	FALSE	FALSE	FALSE	FALSE	FALSE	FALSE
orftAIWin43	1267	0.119952	0.00684097	0.74	0.956	0.747557	0.946382	1267	0.119952	0.00684097	0.751	0.965	0.752521	0.948922	0.00322524	MIC not significant	FALSE	FALSE	FALSE	FALSE	FALSE	FALSE	FALSE	FALSE
orftAIWin44	1267	0.121705	2.79547e-05	0.657	0.617	0.662625	0.620034	1267	0.121705	2.79547e-05	0.642	0.606	0.657354	0.620559	0.850845	MIC not significant	FALSE	FALSE	FALSE	FALSE	FALSE	FALSE	FALSE	FALSE
orftAIWin45	1267	0.127681	0.000862272	0.28	0.287	0.294862	0.300625	1267	0.127681	0.000862272	0.304	0.313	0.314454	0.319165	0.296247	MIC not significant	FALSE	FALSE	FALSE	FALSE	FALSE	FALSE	FALSE	FALSE
orftAIWin46	1267	0.126251	0.00579667	0.366	0.659	0.377469	0.676886	1267	0.126251	0.00579667	0.379	0.679	0.38471	0.688209	0.00671308	MIC not significant	FALSE	FALSE	FALSE	FALSE	FALSE	FALSE	FALSE	FALSE
orftAIWin47	1267	0.127935	9.07281e-05	0.288	0.261	0.292847	0.259149	1267	0.127935	9.07281e-05	0.295	0.263	0.310048	0.27535	0.734786	MIC not significant	FALSE	FALSE	FALSE	FALSE	FALSE	FALSE	FALSE	FALSE
orftAIWin48	1267	0.116149	0.00037495	0.916	0.903	0.908275	0.898181	1267	0.116149	0.00037495	0.889	0.874	0.88877	0.877814	0.491003	MIC not significant	FALSE	FALSE	FALSE	FALSE	FALSE	FALSE	FALSE	FALSE
orftAIWin49	1267	0.1205	0.00178876	0.705	0.764	0.713991	0.764784	1267	0.1205	0.00178876	0.724	0.762	0.729735	0.77865	0.132406	MIC not significant	FALSE	FALSE	FALSE	FALSE	FALSE	FALSE	FALSE	FALSE
orftAIWin50	1267	0.119223	0.000415319	0.776	0.751	0.786248	0.767736	1267	0.119223	0.000415319	0.779	0.753	0.789848	0.773791	0.468546	MIC not significant	FALSE	FALSE	FALSE	FALSE	FALSE	FALSE	FALSE	FALSE
orftAIWin51	1267	0.125042	3.41011e-05	0.424	0.381	0.460774	0.414887	1267	0.125042	3.41011e-05	0.422	0.368	0.454343	0.405797	0.835474	MIC not significant	FALSE	FALSE	FALSE	FALSE	FALSE	FALSE	FALSE	FALSE
orftAIWin52	1267	0.123177	0.00265385	0.555	0.693	0.591273	0.700717	1267	0.123177	0.00265385	0.517	0.645	0.562179	0.669876	0.0667876	MIC not significant	FALSE	FALSE	FALSE	FALSE	FALSE	FALSE	FALSE	FALSE
orftAIWin53	1267	0.11107	0.00065734	0.993	0.993	0.97832	0.97706	1267	0.11107	0.00065734	0.99	0.984	0.979112	0.977296	0.361845	MIC not significant	FALSE	FALSE	FALSE	FALSE	FALSE	FALSE	FALSE	FALSE
orftAIWin54	1267	0.130363	0.000150595	0.174	0.163	0.175803	0.152623	1267	0.130363	0.000150595	0.18	0.153	0.176758	0.149649	0.662549	MIC not significant	FALSE	FALSE	FALSE	FALSE	FALSE	FALSE	FALSE	FALSE
orftAIWin55	1267	0.120674	0.00315187	0.694	0.817	0.702347	0.811539	1267	0.120674	0.00315187	0.716	0.827	0.718323	0.823968	0.0457211	MIC not significant	FALSE	FALSE	FALSE	FALSE	FALSE	FALSE	FALSE	FALSE
orftAIWin56	1267	0.117954	0.00242237	0.829	0.897	0.823949	0.88455	1267	0.117954	0.00242237	0.839	0.905	0.836545	0.889712	0.0799063	MIC not significant	FALSE	FALSE	FALSE	FALSE	FALSE	FALSE	FALSE	FALSE
orftAIWin57	1267	0.125243	0.000832998	0.401	0.404	0.431903	0.435688	1267	0.125243	0.000832998	0.432	0.435	0.446782	0.447507	0.304642	MIC not significant	FALSE	FALSE	FALSE	FALSE	FALSE	FALSE	FALSE	FALSE
orftAIWin58	1267	0.122267	0.0017132	0.595	0.647	0.611055	0.659031	1267	0.122267	0.0017132	0.623	0.675	0.625045	0.675502	0.140891	MIC not significant	FALSE	FALSE	FALSE	FALSE	FALSE	FALSE	FALSE	FALSE
orftAIWin59	1267	0.12241	0.00237607	0.588	0.676	0.612715	0.701838	1267	0.12241	0.00237607	0.568	0.667	0.601989	0.690177	0.0828486	MIC not significant	FALSE	FALSE	FALSE	FALSE	FALSE	FALSE	FALSE	FALSE
orftAIWin60	1267	0.12424	0.00186728	0.469	0.533	0.50537	0.57177	1267	0.12424	0.00186728	0.512	0.569	0.524488	0.587211	0.124212	MIC not significant	FALSE	FALSE	FALSE	FALSE	FALSE	FALSE	FALSE	FALSE
orftAIWin61	1267	0.11983	0.0022418	0.734	0.803	0.750562	0.812674	1267	0.11983	0.0022418	0.73	0.815	0.745216	0.813368	0.092062	MIC not significant	FALSE	FALSE	FALSE	FALSE	FALSE	FALSE	FALSE	FALSE
orftAIWin62	1267	0.121179	0.00132372	0.669	0.704	0.691344	0.720785	1267	0.121179	0.00132372	0.658	0.693	0.683066	0.70982	0.195597	MIC not significant	FALSE	FALSE	FALSE	FALSE	FALSE	FALSE	FALSE	FALSE
orftAIWin63	1267	0.126133	0.00203031	0.389	0.459	0.392071	0.466425	1267	0.126133	0.00203031	0.36	0.42	0.372194	0.447366	0.108912	MIC not significant	FALSE	FALSE	FALSE	FALSE	FALSE	FALSE	FALSE	FALSE
orftAIWin64	1267	0.12847	0.00185983	0.252	0.297	0.261313	0.313143	1267	0.12847	0.00185983	0.247	0.3	0.271494	0.324616	0.124967	MIC not significant	FALSE	FALSE	FALSE	FALSE	FALSE	FALSE	FALSE	FALSE
orftAIWin65	1267	0.13098	0.00140312	0.17	0.185	0.164744	0.187929	1267	0.13098	0.00140312	0.146	0.173	0.163398	0.190027	0.182703	MIC not significant	FALSE	FALSE	FALSE	FALSE	FALSE	FALSE	FALSE	FALSE
orftAIWin66	1267	0.134775	0.00132068	0.051	0.061	0.0487951	0.0562103	1267	0.134775	0.00132068	0.064	0.076	0.0582991	0.0712913	0.19611	MIC not significant	FALSE	FALSE	FALSE	FALSE	FALSE	FALSE	FALSE	FALSE
orftAIWin67	1267	0.118928	0.00227773	0.809	0.869	0.804004	0.862081	1267	0.118928	0.00227773	0.775	0.846	0.785639	0.845112	0.0894924	MIC not significant	FALSE	FALSE	FALSE	FALSE	FALSE	FALSE	FALSE	FALSE
orftAIWin68	1267	0.136514	0.00209456	0.039	0.063	0.038096	0.0560472	1267	0.136514	0.00209456	0.043	0.054	0.0267121	0.0409074	0.103462	non-significant monotone/non-monotone	FALSE	FALSE	FALSE	FALSE	FALSE	TRUE	FALSE	FALSE
orftAIWin69	1267	0.120642	0.002051	0.704	0.781	0.724379	0.786758	1267	0.120642	0.002051	0.671	0.746	0.707097	0.768095	0.107123	MIC not significant	FALSE	FALSE	FALSE	FALSE	FALSE	FALSE	FALSE	FALSE
orftAIWin70	1267	0.120099	0.00235972	0.729	0.797	0.730282	0.802438	1267	0.120099	0.00235972	0.722	0.818	0.737942	0.8143	0.0839151	MIC not significant	FALSE	FALSE	FALSE	FALSE	FALSE	FALSE	FALSE	FALSE
orftAIWin71	1267	0.127925	0.00187303	0.28	0.325	0.287488	0.346249	1267	0.127925	0.00187303	0.281	0.322	0.296782	0.355817	0.123623	MIC not significant	FALSE	FALSE	FALSE	FALSE	FALSE	FALSE	FALSE	FALSE
orftAIWin72	1267	0.136776	0.00276375	0.039	0.059	0.0267572	0.0510817	1267	0.136776	0.00276375	0.04	0.068	0.032502	0.0585028	0.06139	non-significant monotone/non-monotone	FALSE	FALSE	FALSE	FALSE	FALSE	TRUE	FALSE	FALSE
orftAIWin73	1267	0.128029	0.0020158	0.294	0.359	0.305607	0.370966	1267	0.128029	0.0020158	0.284	0.34	0.289038	0.354547	0.110186	MIC not significant	FALSE	FALSE	FALSE	FALSE	FALSE	FALSE	FALSE	FALSE
orftAIWin74	1267	0.130189	0.00310799	0.192	0.294	0.194425	0.304227	1267	0.130189	0.00310799	0.177	0.272	0.178656	0.288604	0.0472681	MIC not significant	FALSE	FALSE	FALSE	FALSE	FALSE	FALSE	FALSE	FALSE
orftAIWin75	1267	0.13759	0.00424278	0.033	0.076	0.0208515	0.0639757	1267	0.13759	0.00424278	0.034	0.082	0.0234843	0.0727719	0.020425	non-significant monotone/non-monotone	FALSE	TRUE	FALSE	FALSE	FALSE	TRUE	FALSE	FALSE
orftAIWin76	1267	0.116468	0.0019553	0.877	0.925	0.869339	0.902851	1267	0.116468	0.0019553	0.878	0.915	0.876324	0.908366	0.115677	MIC not significant	FALSE	FALSE	FALSE	FALSE	FALSE	FALSE	FALSE	FALSE
orftAIWin77	1267	0.117341	0.00378187	0.863	0.946	0.853192	0.934026	1267	0.117341	0.00378187	0.845	0.945	0.846447	0.929604	0.0286183	MIC not significant	FALSE	FALSE	FALSE	FALSE	FALSE	FALSE	FALSE	FALSE
orftAIWin78	1267	0.129246	0.00259134	0.24	0.318	0.239187	0.326108	1267	0.129246	0.00259134	0.217	0.309	0.228402	0.318125	0.07009	MIC not significant	FALSE	FALSE	FALSE	FALSE	FALSE	FALSE	FALSE	FALSE
orftAIWin79	1267	0.129995	0.00167302	0.19	0.217	0.195934	0.236423	1267	0.129995	0.00167302	0.192	0.241	0.203235	0.24076	0.145625	MIC not significant	FALSE	FALSE	FALSE	FALSE	FALSE	FALSE	FALSE	FALSE
orftAIWin80	1267	0.121446	0.00368756	0.687	0.824	0.678474	0.820247	1267	0.121446	0.00368756	0.682	0.836	0.683474	0.828601	0.0306797	MIC not significant	FALSE	FALSE	FALSE	FALSE	FALSE	FALSE	FALSE	FALSE
orftAIWin81	1267	0.130103	0.00139765	0.201	0.222	0.202547	0.229507	1267	0.130103	0.00139765	0.175	0.195	0.172024	0.197334	0.183534	MIC not significant	FALSE	FALSE	FALSE	FALSE	FALSE	FALSE	FALSE	FALSE
orftAIWin82	1267	0.127195	0.00184673	0.35	0.411	0.360581	0.422129	1267	0.127195	0.00184673	0.323	0.38	0.333912	0.397891	0.126292	MIC not significant	FALSE	FALSE	FALSE	FALSE	FALSE	FALSE	FALSE	FALSE
orftAIWin83	1267	0.130145	0.00281342	0.175	0.255	0.177069	0.270105	1267	0.130145	0.00281342	0.175	0.258	0.189963	0.287126	0.0591025	MIC not significant	FALSE	FALSE	FALSE	FALSE	FALSE	FALSE	FALSE	FALSE
orftAIWin84	1267	0.131104	0.000974399	0.156	0.166	0.154395	0.163279	1267	0.131104	0.000974399	0.149	0.16	0.154309	0.160406	0.266837	MIC not significant	FALSE	FALSE	FALSE	FALSE	FALSE	FALSE	FALSE	FALSE
orftAIWin85	1267	0.120165	0.00195802	0.73	0.778	0.727243	0.780085	1267	0.120165	0.00195802	0.705	0.783	0.7356	0.793582	0.115414	MIC not significant	FALSE	FALSE	FALSE	FALSE	FALSE	FALSE	FALSE	FALSE
orftAIWin86	1267	0.127402	0.00422914	0.323	0.514	0.332512	0.536094	1267	0.127402	0.00422914	0.31	0.504	0.330108	0.526534	0.0206288	MIC not significant	FALSE	FALSE	FALSE	FALSE	FALSE	FALSE	FALSE	FALSE
orftAIWin87	1267	0.134154	0.0012292	0.069	0.07	0.0603142	0.069169	1267	0.134154	0.0012292	0.07	0.085	0.0627327	0.0746303	0.212327	MIC not significant	FALSE	FALSE	FALSE	FALSE	FALSE	FALSE	FALSE	FALSE
orftAIWin88	1267	0.118505	0.00299453	0.817	0.912	0.826726	0.899877	1267	0.118505	0.00299453	0.828	0.902	0.820905	0.896083	0.0514989	MIC not significant	FALSE	FALSE	FALSE	FALSE	FALSE	FALSE	FALSE	FALSE
orftAIWin89	1267	0.117293	0.0047259	0.852	0.96	0.847352	0.948819	1267	0.117293	0.0047259	0.847	0.959	0.847416	0.948443	0.0144006	MIC not significant	FALSE	FALSE	FALSE	FALSE	FALSE	FALSE	FALSE	FALSE
orftAIWin90	1267	0.120509	0.000580618	0.704	0.7	0.720314	0.708341	1267	0.120509	0.000580618	0.73	0.725	0.723402	0.713319	0.391409	MIC not significant	FALSE	FALSE	FALSE	FALSE	FALSE	FALSE	FALSE	FALSE
orftAIWin91	1267	0.133689	0.00220738	0.085	0.118	0.0757877	0.111021	1267	0.133689	0.00220738	0.072	0.108	0.0680934	0.0973738	0.0945957	MIC not significant	FALSE	FALSE	FALSE	FALSE	FALSE	FALSE	FALSE	FALSE
orftAIWin92	1267	0.123153	0.00476351	0.544	0.785	0.569525	0.780459	1267	0.123153	0.00476351	0.564	0.8	0.588036	0.794777	0.0140161	MIC not significant	FALSE	FALSE	FALSE	FALSE	FALSE	FALSE	FALSE	FALSE
orftAIWin93	1267	0.121409	2.77494e-06	0.68	0.631	0.686681	0.64463	1267	0.121409	2.77494e-06	0.64	0.593	0.646905	0.600128	0.952757	MIC not significant	FALSE	FALSE	FALSE	FALSE	FALSE	FALSE	FALSE	FALSE
orftAIWin94	1267	0.134573	0.0023522	0.064	0.094	0.0604765	0.0942857	1267	0.134573	0.0023522	0.071	0.096	0.062163	0.0955842	0.0844106	MIC not significant	FALSE	FALSE	FALSE	FALSE	FALSE	FALSE	FALSE	FALSE
orftAIWin95	1267	0.133733	0.00448449	0.093	0.196	0.0781821	0.195702	1267	0.133733	0.00448449	0.089	0.181	0.0801727	0.198095	0.0171404	MIC not significant	FALSE	FALSE	FALSE	FALSE	FALSE	FALSE	FALSE	FALSE
orftAIWin96	1267	0.122324	0.000116702	0.6	0.572	0.615257	0.574747	1267	0.122324	0.000116702	0.595	0.563	0.63222	0.593944	0.700823	MIC not significant	FALSE	FALSE	FALSE	FALSE	FALSE	FALSE	FALSE	FALSE
orftAIWin97	1267	0.128811	0.00530295	0.239	0.492	0.253041	0.504529	1267	0.128811	0.00530295	0.237	0.471	0.249244	0.495372	0.00952821	MIC not significant	FALSE	FALSE	FALSE	FALSE	FALSE	FALSE	FALSE	FALSE
orftAIWin98	1267	0.114752	0.00520345	0.94	0.99	0.930515	0.985571	1267	0.114752	0.00520345	0.941	0.989	0.935433	0.986875	0.0102283	MIC not significant	FALSE	FALSE	FALSE	FALSE	FALSE	FALSE	FALSE	FALSE
orftAIWin99	1267	0.12982	0.000306347	0.212	0.194	0.22594	0.205424	1267	0.12982	0.000306347	0.202	0.184	0.210671	0.192991	0.5336	MIC not significant	FALSE	FALSE	FALSE	FALSE	FALSE	FALSE	FALSE	FALSE
orftAIWin100	1267	0.118922	0.00488117	0.795	0.935	0.805061	0.926014	1267	0.118922	0.00488117	0.775	0.931	0.787494	0.923056	0.0128803	MIC not significant	FALSE	FALSE	FALSE	FALSE	FALSE	FALSE	FALSE	FALSE
codonTTT	1267	0.142649	0.0270125	0.005	0.819	0.00172844	0.81878	1259	0.143803	0.0291415	0.001	0.894	0.000572296	0.889189	1.08798e-09	non-significant monotone/non-monotone	TRUE	TRUE	FALSE	FALSE	TRUE	TRUE	FALSE	FALSE
codonTTC	1267	0.13938	0.0070908	0.007	0.058	0.00536129	0.0529386	1252	0.132634	0.00474567	0.085	0.178	0.0740835	0.193476	0.0147688	MIC not significant	TRUE	FALSE	FALSE	FALSE	TRUE	FALSE	FALSE	FALSE
codonTTA	1267	0.130005	4.02526e-05	0.132	0.116	0.127213	0.10397	1264	0.128011	7.54473e-05	0.196	0.163	0.189223	0.162608	0.757692	MIC not significant	FALSE	FALSE	FALSE	FALSE	FALSE	FALSE	FALSE	FALSE
codonTTG	1267	0.120084	0.0106353	0.614	0.983	0.628475	0.967902	1232	0.126934	0.0190197	0.243	0.989	0.263059	0.977881	1.17974e-06	MIC not significant	FALSE	FALSE	FALSE	FALSE	FALSE	FALSE	FALSE	FALSE
codonTCT	1267	0.130507	0.00463074	0.105	0.236	0.0970668	0.232904	1184	0.127239	0.0190972	0.248	0.983	0.261992	0.974481	1.81491e-06	MIC not significant	FALSE	FALSE	FALSE	FALSE	FALSE	FALSE	FALSE	FALSE
codonTCC	1267	0.144139	0.0491049	0.00213158	1	0.000470558	0.999934	1226	0.13427	0.0336164	0.0498947	0.999882	0.0414272	0.998877	9.92103e-11	Monotone	TRUE	FALSE	FALSE	FALSE	TRUE	FALSE	FALSE	FALSE
codonTCA	1267	0.135389	0.00615865	0.022	0.102	0.0191728	0.0942797	1041	0.160672	0.0484813	0.000421053	0.992368	2.99139e-05	0.984666	6.77199e-13	Monotone	FALSE	TRUE	FALSE	FALSE	FALSE	TRUE	FALSE	FALSE
codonTCG	1267	0.168682	0.036437	0	0.0562178	1.83139e-12	0.0475589	1242	0.161715	0.0294835	0	0.047703	1.14314e-09	0.0391408	1.12543e-09	Non-monotone	TRUE	TRUE	FALSE	FALSE	TRUE	TRUE	FALSE	FALSE
codonTAT	1267	0.130727	0.000803998	0.11	0.115	0.10793	0.108239	1248	0.138431	0.00231651	0.02	0.038	0.016599	0.0295762	0.0892108	MIC not significant	FALSE	TRUE	FALSE	FALSE	FALSE	TRUE	FALSE	FALSE
codonTAC	1267	0.147473	0.01597	0.000697368	0.06225	6.87592e-05	0.0534046	1092	0.159614	0.0728938	0.000158416	1	1.15628e-05	1	1.07754e-19	Monotone	TRUE	TRUE	FALSE	TRUE	TRUE	TRUE	FALSE	TRUE
codonTAA	1267	0.14086	0.0216346	0.007	0.588	0.00268234	0.601003	1098	0.156471	0.0686818	0.000564356	1	4.3722e-05	1	1.05695e-18	Monotone	TRUE	TRUE	FALSE	TRUE	TRUE	TRUE	FALSE	TRUE
codonTAG	1267	0.138815	0.023621	0.011	0.795	0.00623931	0.792416	1163	0.148206	0.0416507	0.001	0.998	0.000494939	0.993694	2.11833e-12	Monotone	TRUE	TRUE	FALSE	TRUE	TRUE	TRUE	FALSE	TRUE
codonTGT	1267	0.176771	0.0523474	0	0.277426	3.10424e-16	0.293129	1133	0.199024	0.0993221	0	1	3.60891e-23	0.999906	1.52136e-27	Monotone	TRUE	TRUE	FALSE	TRUE	TRUE	TRUE	FALSE	TRUE
codonTGC	1267	0.139313	0.0334203	0.008	0.99	0.00493904	0.986552	1239	0.13745	0.025802	0.017	0.911	0.0060914	0.896441	1.30554e-08	non-significant monotone/non-monotone	TRUE	TRUE	FALSE	FALSE	TRUE	TRUE	FALSE	FALSE
codonTGA	1267	0.114627	0.00253407	0.888	0.93	0.867926	0.914461	1267	0.114627	0.00253407	0.864	0.916	0.8611	0.908736	0.0732611	MIC not significant	FALSE	FALSE	FALSE	FALSE	FALSE	FALSE	FALSE	FALSE
codonTGG	1267	0.141186	0.012888	0.004	0.143	0.00267756	0.149248	1249	0.137996	0.00891623	0.02	0.172	0.0152483	0.175229	0.000834032	non-significant monotone/non-monotone	TRUE	TRUE	FALSE	FALSE	TRUE	TRUE	FALSE	FALSE
codonCTT	1267	0.125146	0.00686573	0.328	0.674	0.337358	0.684261	1259	0.1234	0.00543048	0.445	0.7	0.449699	0.718928	0.00890396	MIC not significant	FALSE	FALSE	FALSE	FALSE	FALSE	FALSE	FALSE	FALSE
codonCTC	1267	0.140407	0.0139322	0.01	0.174	0.0028983	0.183748	1140	0.12907	0.00023137	0.332	0.293	0.338142	0.304421	0.607921	MIC not significant	TRUE	FALSE	FALSE	FALSE	TRUE	FALSE	FALSE	FALSE
codonCTA	1267	0.148052	0.0105629	0.0005	0.0128421	4.90573e-05	0.00678192	1131	0.148464	0.0418976	0.004	0.998	0.000379374	0.991732	3.65652e-12	Monotone	TRUE	TRUE	FALSE	TRUE	TRUE	TRUE	FALSE	TRUE
codonCTG	1267	0.133421	1.27162e-05	0.043	0.031	0.0344864	0.0267224	1177	0.13207	0.0062831	0.121	0.315	0.115178	0.326275	0.00651229	MIC not significant	FALSE	FALSE	FALSE	FALSE	FALSE	FALSE	FALSE	FALSE
codonCCT	1267	0.150684	0.0520872	0.000210526	0.999961	9.63387e-06	0.99961	1243	0.147448	0.0434018	0.001	0.997	4.74591e-05	0.99206	1.17902e-13	Monotone	TRUE	TRUE	FALSE	TRUE	TRUE	TRUE	FALSE	TRUE
codonCCC	1267	0.148673	0.00761163	0.001	0.004	4.6096e-05	0.00154472	1028	0.147072	0.00587563	0.025	0.069	0.0168236	0.0675982	0.0139597	non-significant monotone/non-monotone	TRUE	TRUE	FALSE	FALSE	TRUE	TRUE	FALSE	FALSE
codonCCA	1267	0.137254	0.000130329	0.014	0.012	0.00871981	0.0069499	880	0.155578	0.0452911	0.0239605	0.99975	0.0155561	0.998519	1.80128e-10	Monotone	FALSE	TRUE	FALSE	FALSE	TRUE	TRUE	FALSE	TRUE
codonCCG	1267	0.123621	0.014997	0.365	0.981	0.380085	0.966456	1204	0.118002	0.00486576	0.812	0.929	0.807243	0.923687	0.0154846	MIC not significant	FALSE	FALSE	FALSE	FALSE	FALSE	FALSE	FALSE	FALSE
codonCAT	1267	0.133953	0.00740533	0.028	0.141	0.022478	0.130832	496	0.282435	0.235786	0	1	5.59784e-23	1	1.04697e-30	Monotone	FALSE	TRUE	FALSE	FALSE	FALSE	TRUE	FALSE	FALSE
codonCAC	1267	0.141499	0.0025627	0.002	0.005	0.00157826	0.00319968	696	0.190837	0.0984685	0.000128713	1	5.28763e-06	1	2.27667e-17	Monotone	TRUE	TRUE	FALSE	TRUE	TRUE	TRUE	FALSE	TRUE
codonCAA	1267	0.12332	0.000749821	0.255	0.255	0.264871	0.264525	387	0.297634	0.218844	0	1	3.16609e-18	1	1.93642e-22	MIC not significant	FALSE	TRUE	FALSE	FALSE	FALSE	TRUE	FALSE	FALSE
codonCAG	1267	0.136197	0.00862203	0.021	0.157	0.0166058	0.156416	1108	0.126892	6.95481e-06	0.455	0.412	0.476335	0.429293	0.930127	MIC not significant	FALSE	FALSE	FALSE	FALSE	FALSE	FALSE	FALSE	FALSE
codonCGT	1267	0.13977	0.000105145	0.005	0.004	0.00396418	0.00294267	1193	0.140507	0.0039078	0.015	0.047	0.010854	0.032274	0.0308488	Non-monotone	TRUE	TRUE	FALSE	FALSE	TRUE	TRUE	FALSE	FALSE
codonCGC	1267	0.128126	0.00102111	0.145	0.157	0.1542	0.162028	881	0.153095	0.0418287	0.0406053	0.999724	0.0311169	0.997879	8.96846e-10	MIC not significant	FALSE	FALSE	FALSE	FALSE	FALSE	TRUE	FALSE	FALSE
codonCGA	1267	0.131312	0.00824877	0.088	0.326	0.0776252	0.353277	1117	0.145921	0.0327177	0.009	0.96	0.00226222	0.949494	1.13745e-09	MIC not significant	FALSE	TRUE	FALSE	FALSE	FALSE	TRUE	FALSE	FALSE
codonCGG	1267	0.137551	0.00634674	0.018	0.062	0.00860925	0.0594347	1144	0.148686	0.0327128	0.006	0.923	0.000926272	0.899235	7.19835e-10	non-significant monotone/non-monotone	FALSE	TRUE	FALSE	FALSE	TRUE	TRUE	FALSE	FALSE
codonATT	1267	0.12747	0.00393607	0.242	0.41	0.247113	0.424126	1262	0.129181	0.00317378	0.166	0.268	0.175045	0.285426	0.0453995	MIC not significant	FALSE	FALSE	FALSE	FALSE	FALSE	FALSE	FALSE	FALSE
codonATC	1267	0.134918	0.00738793	0.039	0.184	0.0318323	0.185416	1246	0.128266	0.00341237	0.152	0.238	0.146515	0.248916	0.0392377	MIC not significant	FALSE	FALSE	FALSE	FALSE	FALSE	FALSE	FALSE	FALSE
codonATA	1267	0.148819	0.0118039	0.000539474	0.0169211	3.56043e-05	0.00948221	1221	0.147334	0.024481	0.00114474	0.436697	0.000182663	0.462032	3.89446e-08	non-significant monotone/non-monotone	TRUE	TRUE	FALSE	FALSE	TRUE	TRUE	FALSE	FALSE
codonATG	1267	0.122538	0.00791779	0.489	0.883	0.520103	0.869457	1259	0.126502	0.0107448	0.278	0.841	0.302088	0.846148	0.000229354	MIC not significant	FALSE	FALSE	FALSE	FALSE	FALSE	FALSE	FALSE	FALSE
codonACT	1267	0.132828	0.00074472	0.061	0.061	0.0480719	0.0466042	1210	0.133533	0.00545332	0.078	0.207	0.0716509	0.217297	0.0101812	MIC not significant	FALSE	FALSE	FALSE	FALSE	FALSE	FALSE	FALSE	FALSE
codonACC	1267	0.165689	0.0762987	0	1	3.69674e-11	0.999999	1240	0.156368	0.0662358	1.9802e-05	1	1.10385e-07	0.999998	3.28827e-20	Monotone	TRUE	TRUE	FALSE	TRUE	TRUE	TRUE	FALSE	TRUE
codonACA	1267	0.148186	0.00811746	0.000486842	0.00614474	5.42713e-05	0.0023198	1054	0.174908	0.0566775	9.90099e-06	0.895386	5.00226e-10	0.885746	4.77284e-15	non-significant monotone/non-monotone	TRUE	TRUE	FALSE	FALSE	TRUE	TRUE	FALSE	FALSE
codonACG	1267	0.164975	0.0594801	0	0.997356	7.0195e-11	0.992874	1254	0.163639	0.0559267	0	0.994495	1.0615e-09	0.988219	2.12398e-17	Monotone	TRUE	TRUE	FALSE	TRUE	TRUE	TRUE	FALSE	TRUE
codonAAT	1267	0.164175	0.0482639	0	0.741891	2.57442e-10	0.750573	1119	0.195131	0.114888	0	1	3.84501e-22	1	1.75107e-31	Monotone	TRUE	TRUE	FALSE	TRUE	TRUE	TRUE	FALSE	TRUE
codonAAC	1267	0.126845	0.00098581	0.204	0.209	0.205787	0.213459	1187	0.124365	0.0115452	0.383	0.907	0.39311	0.895837	0.000208276	MIC not significant	FALSE	FALSE	FALSE	FALSE	FALSE	FALSE	FALSE	FALSE
codonAAA	1267	0.154977	0.0136773	3.94737e-05	0.00403947	5.99599e-07	0.00125857	1042	0.179255	0.104692	0	1	4.84266e-11	1	8.04446e-27	Monotone	TRUE	TRUE	FALSE	TRUE	TRUE	TRUE	FALSE	TRUE
codonAAG	1267	0.135674	0.0295532	0.028	0.996	0.0182145	0.991738	1258	0.135707	0.0262954	0.041	0.986	0.0296678	0.973061	7.29032e-09	Monotone	FALSE	FALSE	FALSE	FALSE	FALSE	TRUE	FALSE	FALSE
codonAGT	1267	0.149235	0.0380933	0.001	0.924	2.32811e-05	0.917894	1142	0.177598	0.0821511	0	1	9.99206e-13	0.999984	4.91481e-23	Monotone	TRUE	TRUE	FALSE	TRUE	TRUE	TRUE	FALSE	TRUE
codonAGC	1267	0.142938	0.0397996	0.001	0.999	0.000668717	0.995878	1210	0.139887	0.0220015	0.018	0.726	0.0109297	0.739194	2.18351e-07	non-significant monotone/non-monotone	TRUE	TRUE	FALSE	FALSE	TRUE	TRUE	FALSE	FALSE
codonAGA	1267	0.142046	0.00780665	0.005	0.034	0.00147937	0.0238592	1163	0.145377	0.0351637	0.004	0.982	0.00190277	0.972257	1.15351e-10	Monotone	TRUE	TRUE	FALSE	TRUE	TRUE	TRUE	FALSE	TRUE
codonAGG	1267	0.131434	0.018643	0.083	0.921	0.0828362	0.91258	1253	0.130031	0.0148407	0.17	0.876	0.175865	0.870282	1.53187e-05	MIC not significant	FALSE	FALSE	FALSE	FALSE	FALSE	FALSE	FALSE	FALSE
codonGTT	1267	0.194431	0.00804682	0	0	1.66905e-23	1.35872e-19	616	0.31367	0.312782	0	1	1.39345e-50	1	5.57802e-52	Monotone	TRUE	TRUE	FALSE	TRUE	TRUE	TRUE	FALSE	TRUE
codonGTC	1267	0.127362	0.0178448	0.205	0.969	0.204042	0.954689	1230	0.118857	0.00844716	0.665	0.952	0.684626	0.944625	0.00125136	MIC not significant	FALSE	FALSE	FALSE	FALSE	FALSE	FALSE	FALSE	FALSE
codonGTA	1267	0.122253	0.00260115	0.239	0.294	0.249282	0.325913	296	0.337929	0.259953	0	1	5.04659e-17	1	5.45741e-21	MIC not significant	FALSE	TRUE	FALSE	FALSE	FALSE	TRUE	FALSE	FALSE
codonGTG	1267	0.124592	0.00984912	0.339	0.83	0.360232	0.829987	1196	0.138242	0.0261974	0.035	0.974	0.0323854	0.962342	1.81457e-08	MIC not significant	FALSE	FALSE	FALSE	FALSE	FALSE	TRUE	FALSE	FALSE
codonGCT	1267	0.13287	0.00235659	0.068	0.097	0.0547019	0.0867497	1184	0.134015	0.0141315	0.065	0.621	0.053139	0.645216	4.11959e-05	MIC not significant	FALSE	FALSE	FALSE	FALSE	FALSE	FALSE	FALSE	FALSE
codonGCC	1267	0.143669	0.0590039	0.003	1	0.00047294	1	1227	0.144013	0.0444743	0.00285526	0.999921	0.000770272	0.999366	8.41196e-14	Monotone	TRUE	TRUE	FALSE	TRUE	TRUE	TRUE	FALSE	TRUE
codonGCA	1267	0.141363	0.00188725	0.003	0.005	0.0013015	0.00236498	1042	0.143216	0.0317324	0.043	0.991	0.0388785	0.987265	7.05151e-09	Monotone	TRUE	FALSE	FALSE	FALSE	TRUE	FALSE	FALSE	FALSE
codonGCG	1267	0.149235	0.0459748	0.001	0.998	5.96488e-05	0.995018	1253	0.150099	0.0428604	0.000460526	0.994303	3.59293e-05	0.987824	1.34841e-13	Monotone	TRUE	TRUE	FALSE	TRUE	TRUE	TRUE	FALSE	TRUE
codonGAT	1267	0.133438	0.0110812	0.028	0.233	0.0195848	0.246915	355	0.341099	0.288975	0	1	1.5354e-27	1	5.65028e-28	Monotone	FALSE	TRUE	FALSE	FALSE	FALSE	TRUE	FALSE	FALSE
codonGAC	1267	0.163346	0.00320862	0	0	1.76056e-09	1.19718e-08	846	0.228121	0.142857	0	1	3.67885e-25	1	4.04271e-30	Monotone	TRUE	TRUE	FALSE	TRUE	TRUE	TRUE	FALSE	TRUE
codonGAA	1267	0.122453	0.000208197	0.397	0.363	0.438303	0.402288	1150	0.134099	0.00800068	0.106	0.42	0.111606	0.429198	0.00239685	MIC not significant	FALSE	FALSE	FALSE	FALSE	FALSE	FALSE	FALSE	FALSE
codonGAG	1267	0.133382	0.00020912	0.048	0.044	0.0365416	0.0298925	1064	0.140571	0.0300047	0.059	0.989	0.0481593	0.979188	1.29577e-08	MIC not significant	FALSE	FALSE	FALSE	FALSE	FALSE	FALSE	FALSE	FALSE
codonGGT	1267	0.123226	0.000304436	0.405	0.388	0.434779	0.407272	1244	0.120814	1.15492e-05	0.498	0.447	0.525016	0.472842	0.904687	MIC not significant	FALSE	FALSE	FALSE	FALSE	FALSE	FALSE	FALSE	FALSE
codonGGC	1267	0.141025	0.0318295	0.005	0.981	0.00180968	0.966822	1236	0.137713	0.0250338	0.013	0.89	0.00793969	0.878747	2.24252e-08	non-significant monotone/non-monotone	TRUE	TRUE	FALSE	FALSE	TRUE	TRUE	FALSE	FALSE
codonGGA	1267	0.139192	0.0270809	0.011	0.94	0.00606712	0.924241	1262	0.138444	0.0250316	0.015	0.917	0.0104711	0.907682	1.59942e-08	non-significant monotone/non-monotone	TRUE	TRUE	FALSE	FALSE	TRUE	TRUE	FALSE	FALSE
codonGGG	1267	0.133696	0.00292761	0.057	0.1	0.0436909	0.0814488	1227	0.127362	0.00883652	0.231	0.695	0.265501	0.69757	0.000978186	MIC not significant	FALSE	FALSE	FALSE	FALSE	FALSE	FALSE	FALSE	FALSE
pcodonTTTTTT	1267	0.15109	0.00121835	5.26316e-05	5.26316e-05	7.77779e-06	9.23038e-06	396	0.365539	0.310008	0	1	3.20008e-38	1	1.28271e-33	Monotone	TRUE	TRUE	FALSE	TRUE	TRUE	TRUE	FALSE	TRUE
pcodonTTTTTC	1267	0.122277	0.0173587	0.189	0.949	0.21565	0.933462	275	0.3506	0.269688	0	1	4.39258e-18	1	2.15156e-20	MIC not significant	FALSE	TRUE	FALSE	FALSE	FALSE	TRUE	FALSE	FALSE
pcodonTTTTTA	1267	0.150878	0.00238731	6.57895e-05	9.21053e-05	6.18623e-06	1.46877e-05	355	0.362711	0.275249	0	1	1.87272e-34	1	1.69081e-26	Monotone	TRUE	TRUE	FALSE	TRUE	TRUE	TRUE	FALSE	TRUE
pcodonTTTTTG	1267	0.128263	0.00282469	0.089	0.135	0.0832991	0.131714	342	0.343263	0.249856	0	1	5.07387e-25	1	5.10402e-23	MIC not significant	FALSE	TRUE	FALSE	FALSE	FALSE	TRUE	FALSE	FALSE
pcodonTTTTCT	1267	0.123261	0.00218318	0.163	0.2	0.149035	0.196785	222	0.412755	0.34781	0	1	2.60304e-24	1	3.44433e-22	MIC not significant	FALSE	TRUE	FALSE	FALSE	FALSE	TRUE	FALSE	FALSE
pcodonTTTTCC	1267	0.117168	0.00802211	0.249	0.616	0.261756	0.631564	148	0.431277	0.292741	0	0.99997	2.65211e-12	0.999491	1.25372e-12	MIC not significant	FALSE	TRUE	FALSE	FALSE	FALSE	TRUE	FALSE	FALSE
pcodonTTTTCA	1267	0.107463	0.000271658	0.594	0.56	0.598698	0.570761	94	0.496434	0.389947	1.9802e-05	0.99999	7.29459e-12	0.999849	1.75106e-11	MIC not significant	FALSE	TRUE	FALSE	FALSE	FALSE	TRUE	FALSE	FALSE
pcodonTTTTCG	1267	0.117558	0.0114953	0.378	0.9	0.415589	0.888145	229	0.333059	0.25785	0	1	2.36305e-09	1	2.05734e-16	MIC not significant	FALSE	TRUE	FALSE	FALSE	FALSE	TRUE	FALSE	FALSE
pcodonTTTTAT	1267	0.132433	0.00106393	0.03	0.03	0.023522	0.0256854	283	0.404356	0.335382	0	1	1.02987e-33	1	9.61196e-27	Monotone	FALSE	TRUE	FALSE	FALSE	FALSE	TRUE	FALSE	FALSE
pcodonTTTTAC	1267	0.107089	0.00850176	0.625	0.933	0.641807	0.925914	105	0.381456	0.302315	0.00262376	1	0.00019383	0.999999	1.24056e-09	MIC not significant	FALSE	TRUE	FALSE	FALSE	FALSE	TRUE	FALSE	FALSE
pcodonTTTTAA	1267	0.119101	5.55829e-05	0.144	0.129	0.149593	0.125574	140	0.493217	0.403395	0	1	1.34522e-21	0.999998	3.51765e-17	MIC not significant	FALSE	TRUE	FALSE	FALSE	FALSE	TRUE	FALSE	FALSE
pcodonTTTTAG	1267	0.124801	0.0103028	0.045	0.357	0.0452475	0.36406	156	0.381559	0.287771	9.90099e-06	1	5.41362e-09	0.999999	5.28494e-13	Monotone	FALSE	TRUE	FALSE	FALSE	FALSE	TRUE	FALSE	FALSE
pcodonTTTTGT	1267	0.113991	0.00304595	0.507	0.631	0.509478	0.633637	196	0.398453	0.369049	0	1	1.17563e-17	1	3.71376e-21	MIC not significant	FALSE	TRUE	FALSE	FALSE	FALSE	TRUE	FALSE	FALSE
pcodonTTTTGC	1267	0.121398	0.0191222	0.21	0.953	0.212745	0.948459	209	0.330324	0.281618	9.90099e-06	1	2.69326e-08	1	1.40027e-16	MIC not significant	FALSE	TRUE	FALSE	FALSE	FALSE	TRUE	FALSE	FALSE
pcodonTTTTGA	1267	0.149645	0.0137964	1.31579e-05	0.00457895	2.00308e-06	0.00208351	230	0.359912	0.273307	0	1	2.74263e-13	1	1.56063e-17	Monotone	TRUE	TRUE	FALSE	TRUE	TRUE	TRUE	FALSE	TRUE
pcodonTTTTGG	1267	0.146597	0.0138561	0.001	0.024	7.44819e-05	0.0208928	343	0.332525	0.237501	0	1	2.94015e-22	1	7.33238e-22	Monotone	TRUE	TRUE	FALSE	TRUE	TRUE	TRUE	FALSE	TRUE
pcodonTTTCTT	1267	0.13046	0.00407769	0.046	0.096	0.0370094	0.0879471	276	0.384857	0.315782	0	1	2.47709e-26	1	2.24532e-24	Monotone	FALSE	TRUE	FALSE	FALSE	FALSE	TRUE	FALSE	FALSE
pcodonTTTCTC	1267	0.105794	0.00555233	0.686	0.893	0.689693	0.881836	90	0.47873	0.334552	0.001	0.999	1.16359e-08	0.994527	2.36668e-09	MIC not significant	FALSE	TRUE	FALSE	FALSE	FALSE	TRUE	FALSE	FALSE
pcodonTTTCTA	1267	0.106592	0.00104576	0.737	0.753	0.753261	0.767508	131	0.414288	0.315404	3.9604e-05	1	2.11528e-09	0.999994	2.98525e-12	MIC not significant	FALSE	TRUE	FALSE	FALSE	FALSE	TRUE	FALSE	FALSE
pcodonTTTCTG	1267	0.119369	0.0101841	0.167	0.594	0.170225	0.612526	141	0.54057	0.382278	0	0.994416	3.42834e-29	0.983584	3.11714e-16	MIC not significant	FALSE	TRUE	FALSE	FALSE	FALSE	TRUE	FALSE	FALSE
pcodonTTTCCT	1267	0.134182	0.0158908	0.013	0.308	0.00637996	0.312918	224	0.461407	0.349424	0	1	6.61315e-37	0.999967	1.69489e-22	Monotone	TRUE	TRUE	FALSE	TRUE	TRUE	TRUE	FALSE	TRUE
pcodonTTTCCC	1267	0.111284	0.00305094	0.29	0.404	0.292113	0.421119	62	0.386283	0.155333	0.016	0.467	0.00162446	0.529725	0.00164991	MIC not significant	FALSE	TRUE	FALSE	FALSE	FALSE	TRUE	FALSE	FALSE
pcodonTTTCCA	1267	0.110075	0.00168776	0.335	0.381	0.353776	0.408684	63	0.560395	0.390385	0.000131579	0.997105	4.01128e-08	0.988025	9.79588e-08	MIC not significant	FALSE	TRUE	FALSE	FALSE	FALSE	TRUE	FALSE	FALSE
pcodonTTTCCG	1267	0.124155	0.0128738	0.07	0.512	0.0652153	0.540801	157	0.362391	0.236768	4.9505e-05	0.99999	1.81829e-07	0.999829	1.03826e-10	MIC not significant	FALSE	TRUE	FALSE	FALSE	FALSE	TRUE	FALSE	FALSE
pcodonTTTCAG	1267	0.110965	0.00678573	0.289	0.649	0.304811	0.663282	65	0.440645	0.218529	0.009	0.854	0.00114723	0.842477	8.63415e-05	MIC not significant	FALSE	TRUE	FALSE	FALSE	FALSE	TRUE	FALSE	FALSE
pcodonTTTCGT	1267	0.120993	0.00777594	0.206	0.55	0.209147	0.564668	226	0.369263	0.296204	0	1	6.28749e-17	1	7.94492e-19	MIC not significant	FALSE	TRUE	FALSE	FALSE	FALSE	TRUE	FALSE	FALSE
pcodonTTTCGC	1267	0.0979677	0.00030814	0.96	0.951	0.945819	0.937878	48	0.483707	0.273161	0.01	0.935	0.00127698	0.904045	0.000138541	MIC not significant	FALSE	TRUE	FALSE	FALSE	FALSE	TRUE	FALSE	FALSE
pcodonTTTCGA	1267	0.110745	0.00374919	0.586	0.753	0.613686	0.764065	162	0.368723	0.269395	3.9604e-05	1	5.67043e-09	0.999996	1.48472e-12	MIC not significant	FALSE	TRUE	FALSE	FALSE	FALSE	TRUE	FALSE	FALSE
pcodonTTTCGG	1267	0.128575	0.00684433	0.023	0.104	0.0176886	0.0959178	152	0.388251	0.292551	3.9604e-05	1	7.5221e-09	0.999999	6.31732e-13	Monotone	FALSE	TRUE	FALSE	FALSE	FALSE	TRUE	FALSE	FALSE
pcodonTTTATT	1267	0.151171	0.00603758	0.000157895	0.000710526	1.13519e-05	0.000195994	476	0.294694	0.18765	0	1	9.16433e-24	0.999995	3.40729e-23	Monotone	TRUE	TRUE	FALSE	TRUE	TRUE	TRUE	FALSE	TRUE
pcodonTTTATC	1267	0.129681	0.0265036	0.032	0.946	0.0259001	0.942732	219	0.373405	0.274647	0	1	3.70612e-16	0.999999	7.55741e-17	Monotone	FALSE	TRUE	FALSE	FALSE	FALSE	TRUE	FALSE	FALSE
pcodonTTTATA	1267	0.127188	0.00205168	0.077	0.102	0.0772674	0.102464	273	0.327831	0.241992	0	1	2.06921e-13	1	4.83201e-18	MIC not significant	FALSE	TRUE	FALSE	FALSE	FALSE	TRUE	FALSE	FALSE
pcodonTTTATG	1267	0.146649	0.00666183	0.000381579	0.00346053	8.82053e-05	0.00145784	383	0.3172	0.240145	0	1	3.90078e-23	1	1.57267e-24	Monotone	TRUE	TRUE	FALSE	TRUE	TRUE	TRUE	FALSE	TRUE
pcodonTTTACT	1267	0.120729	0.00277009	0.119	0.164	0.123117	0.181334	145	0.441559	0.430224	0	1	3.65051e-16	1	3.43283e-19	MIC not significant	FALSE	TRUE	FALSE	FALSE	FALSE	TRUE	FALSE	FALSE
pcodonTTTACC	1267	0.117886	0.00864097	0.213	0.596	0.210388	0.618305	145	0.286914	0.221157	0.0168614	1	0.00717062	1	2.39806e-09	MIC not significant	FALSE	TRUE	FALSE	FALSE	FALSE	TRUE	FALSE	FALSE
pcodonTTTACA	1267	0.105114	3.69488e-05	0.645	0.603	0.666091	0.624519	64	0.496112	0.367592	0.000828947	0.999737	1.04387e-05	0.998889	1.09958e-07	MIC not significant	FALSE	TRUE	FALSE	FALSE	FALSE	TRUE	FALSE	FALSE
pcodonTTTACG	1267	0.125703	0.0135341	0.1	0.657	0.0908953	0.661103	247	0.349711	0.261716	0	1	4.40966e-15	1	7.08844e-18	MIC not significant	FALSE	TRUE	FALSE	FALSE	FALSE	TRUE	FALSE	FALSE
pcodonTTTAAT	1267	0.106554	0.00370582	0.627	0.77	0.628959	0.772809	89	0.43725	0.429191	0.00039604	1	2.0198e-06	1	3.27848e-12	MIC not significant	FALSE	TRUE	FALSE	FALSE	FALSE	TRUE	FALSE	FALSE
pcodonTTTAAC	1267	0.110942	1.36968e-05	0.334	0.298	0.342909	0.301279	77	0.35021	0.280225	0.0203168	1	0.00797598	0.999983	7.42377e-07	MIC not significant	FALSE	TRUE	FALSE	FALSE	FALSE	TRUE	FALSE	FALSE
pcodonTTTAAA	1267	0.100327	0.00211211	0.885	0.933	0.875811	0.914366	67	0.530694	0.398836	7.89474e-05	0.999711	4.6248e-08	0.998264	2.25485e-08	MIC not significant	FALSE	TRUE	FALSE	FALSE	FALSE	TRUE	FALSE	FALSE
pcodonTTTAAG	1267	0.116695	0.0111724	0.465	0.925	0.483858	0.917821	247	0.344617	0.259677	0	1	5.36417e-14	1	9.97517e-18	MIC not significant	FALSE	TRUE	FALSE	FALSE	FALSE	TRUE	FALSE	FALSE
pcodonTTTAGT	1267	0.118922	0.00313457	0.134	0.21	0.143367	0.229224	122	0.533453	0.458265	0	1	7.46888e-24	0.999999	1.13242e-17	MIC not significant	FALSE	TRUE	FALSE	FALSE	FALSE	TRUE	FALSE	FALSE
pcodonTTTAGC	1267	0.115668	0.0144002	0.307	0.931	0.306581	0.923954	147	0.413013	0.250685	0	0.978941	1.88032e-13	0.96111	1.06091e-10	MIC not significant	FALSE	TRUE	FALSE	FALSE	FALSE	TRUE	FALSE	FALSE
pcodonTTTAGA	1267	0.112932	0.0130364	0.461	0.965	0.481862	0.947898	156	0.371086	0.222741	2.63158e-05	0.9995	5.37614e-08	0.997201	4.98766e-10	MIC not significant	FALSE	TRUE	FALSE	FALSE	FALSE	TRUE	FALSE	FALSE
pcodonTTTAGG	1267	0.130463	0.00610784	0.055	0.171	0.0488072	0.165973	322	0.326713	0.228733	0	1	1.29356e-19	0.999999	8.27412e-20	MIC not significant	FALSE	TRUE	FALSE	FALSE	FALSE	TRUE	FALSE	FALSE
pcodonTTTGTC	1267	0.124117	0.0205289	0.121	0.936	0.112967	0.933639	225	0.28293	0.132879	0.000723684	0.994118	2.35703e-05	0.983483	1.77686e-08	MIC not significant	FALSE	TRUE	FALSE	FALSE	FALSE	TRUE	FALSE	FALSE
pcodonTTTGTG	1267	0.129605	0.00968213	0.037	0.218	0.0285724	0.237355	234	0.36328	0.286956	0	1	1.0983e-14	1	8.84789e-19	Monotone	FALSE	TRUE	FALSE	FALSE	FALSE	TRUE	FALSE	FALSE
pcodonTTTGCT	1267	0.128009	0.0164458	0.03	0.571	0.0262611	0.577234	187	0.303093	0.21282	0.00146535	1	9.15008e-05	1	3.03677e-11	Monotone	FALSE	TRUE	FALSE	FALSE	FALSE	TRUE	FALSE	FALSE
pcodonTTTGCC	1267	0.128262	0.0190839	0.02	0.608	0.0138944	0.636613	147	0.353982	0.270089	0.000108911	1	2.60681e-07	0.999999	1.52824e-11	Monotone	FALSE	TRUE	FALSE	FALSE	TRUE	TRUE	FALSE	TRUE
pcodonTTTGCA	1267	0.120507	0.00673076	0.053	0.21	0.047347	0.214485	92	0.448095	0.31617	5.26316e-05	0.999842	7.63947e-08	0.998334	5.45301e-09	MIC not significant	FALSE	TRUE	FALSE	FALSE	FALSE	TRUE	FALSE	FALSE
pcodonTTTGCG	1267	0.136089	0.0286277	0.002	0.881	0.00273202	0.873667	259	0.342578	0.185681	0	0.994475	2.92984e-13	0.985351	3.91022e-13	Monotone	TRUE	TRUE	FALSE	TRUE	TRUE	TRUE	FALSE	TRUE
pcodonTTTGAA	1267	0.116459	0.00754646	0.289	0.601	0.289633	0.634806	140	0.474459	0.35781	0	0.99999	9.41073e-19	0.999849	5.99498e-15	MIC not significant	FALSE	TRUE	FALSE	FALSE	FALSE	TRUE	FALSE	FALSE
pcodonTTTGAG	1267	0.103358	0.00313347	0.773	0.861	0.774335	0.864648	88	0.401223	0.301185	0.00244737	0.999987	0.000165672	0.999953	3.09598e-08	MIC not significant	FALSE	TRUE	FALSE	FALSE	FALSE	TRUE	FALSE	FALSE
pcodonTTTGGT	1267	0.131297	0.0149271	0.053	0.525	0.0420217	0.540557	327	0.28087	0.182652	2.9703e-05	1	7.78562e-09	1	5.95952e-16	MIC not significant	FALSE	TRUE	FALSE	FALSE	FALSE	TRUE	FALSE	FALSE
pcodonTTTGGC	1267	0.134129	0.01635	0.01	0.367	0.00700401	0.360272	241	0.384405	0.229709	0	0.993693	4.45244e-20	0.983325	3.02741e-15	Monotone	TRUE	TRUE	FALSE	TRUE	TRUE	TRUE	FALSE	TRUE
pcodonTTTGGA	1267	0.160432	0.0265666	0	0.0184257	8.00726e-09	0.0131119	348	0.266529	0.173835	1.9802e-05	1	8.35421e-09	1	4.55835e-16	Monotone	TRUE	TRUE	FALSE	TRUE	TRUE	TRUE	FALSE	TRUE
pcodonTTTGGG	1267	0.145138	0.0034456	0.000381579	0.000921053	7.90714e-05	0.000296795	291	0.384777	0.356753	0	1	4.90305e-26	1	1.59539e-29	Monotone	TRUE	TRUE	FALSE	TRUE	TRUE	TRUE	FALSE	TRUE
pcodonTTCTTT	1267	0.127237	0.0131522	0.105	0.605	0.103938	0.629191	297	0.327869	0.233065	0	1	6.84433e-15	1	9.55304e-19	MIC not significant	FALSE	TRUE	FALSE	FALSE	FALSE	TRUE	FALSE	FALSE
pcodonTTCTTC	1267	0.135497	0.0279333	0.004	0.831	0.00190871	0.845226	225	0.254275	0.132712	0.0112632	0.999974	0.00402074	0.999789	1.81662e-08	Monotone	TRUE	TRUE	FALSE	TRUE	TRUE	TRUE	FALSE	TRUE
pcodonTTCTTA	1267	0.133677	0.0190645	0.016	0.534	0.00855015	0.555174	262	0.363501	0.204131	0	0.985149	5.1132e-18	0.971442	1.38762e-14	Monotone	FALSE	TRUE	FALSE	FALSE	TRUE	TRUE	FALSE	TRUE
pcodonTTCTTG	1267	0.120295	0.0070757	0.31	0.604	0.314012	0.635337	260	0.325869	0.204531	0	1	5.44547e-11	0.999963	1.63843e-14	MIC not significant	FALSE	TRUE	FALSE	FALSE	FALSE	TRUE	FALSE	FALSE
pcodonTTCTCT	1267	0.122776	0.0148404	0.052	0.593	0.052881	0.6184	117	0.363357	0.253274	0.00105263	0.999974	2.85084e-05	0.999895	7.33317e-09	MIC not significant	FALSE	TRUE	FALSE	FALSE	FALSE	TRUE	FALSE	FALSE
pcodonTTCTCC	1267	0.112777	0.0188625	0.368	0.997	0.372007	0.988392	110	0.413481	0.288719	0.000184211	0.999961	3.39511e-07	0.999634	1.42881e-09	MIC not significant	FALSE	TRUE	FALSE	FALSE	FALSE	TRUE	FALSE	FALSE
pcodonTTCTCA	1267	0.116003	0.00367624	0.101	0.183	0.0923446	0.191549	56	0.465512	0.283231	0.00196053	0.952053	6.1462e-05	0.925189	3.23339e-05	MIC not significant	FALSE	TRUE	FALSE	FALSE	FALSE	TRUE	FALSE	FALSE
pcodonTTCTCG	1267	0.118039	0.0114569	0.21	0.758	0.2275	0.765174	157	0.429568	0.313825	0	1	1.95138e-14	0.999961	2.37444e-14	MIC not significant	FALSE	TRUE	FALSE	FALSE	FALSE	TRUE	FALSE	FALSE
pcodonTTCTAT	1267	0.136615	0.0153539	0.005	0.132	0.00107663	0.128466	176	0.368783	0.263834	9.90099e-06	1	4.35895e-09	0.999998	3.0947e-13	Monotone	TRUE	TRUE	FALSE	TRUE	TRUE	TRUE	FALSE	TRUE
pcodonTTCTAC	1267	0.110216	0.00309099	0.401	0.536	0.398495	0.532008	76	0.496244	0.191215	3.94737e-05	0.0682763	2.87713e-09	0.0560212	7.8233e-05	MIC not significant	FALSE	TRUE	FALSE	FALSE	FALSE	TRUE	FALSE	FALSE
pcodonTTCTAA	1267	0.118922	0.0103211	0.051	0.387	0.041976	0.410974	69	0.512161	0.390963	9.21053e-05	0.999882	7.67315e-08	0.999082	9.27792e-09	MIC not significant	FALSE	TRUE	FALSE	FALSE	FALSE	TRUE	FALSE	FALSE
pcodonTTCTAG	1267	0.129054	0.00761611	0.01	0.073	0.0059624	0.0587316	117	0.39676	0.303427	0.000118812	1	1.88372e-07	0.99999	1.23611e-10	Monotone	TRUE	TRUE	FALSE	TRUE	TRUE	TRUE	FALSE	TRUE
pcodonTTCTGT	1267	0.110004	0.00126052	0.429	0.438	0.444495	0.472514	92	0.310558	0.202654	0.0706832	1	0.0585439	0.999832	6.72043e-06	MIC not significant	FALSE	FALSE	FALSE	FALSE	FALSE	FALSE	FALSE	FALSE
pcodonTTCTGC	1267	0.137019	0.0211619	0.00102632	0.280987	0.000394765	0.289377	155	0.362207	0.265859	0.000148515	1	4.09682e-07	0.999999	6.62598e-12	Monotone	TRUE	TRUE	FALSE	TRUE	TRUE	TRUE	FALSE	TRUE
pcodonTTCTGA	1267	0.122021	0.0156826	0.074	0.717	0.0685196	0.736507	131	0.336771	0.218828	0.00402632	0.999987	0.000634353	0.999913	1.76515e-08	MIC not significant	FALSE	TRUE	FALSE	FALSE	FALSE	TRUE	FALSE	FALSE
pcodonTTCTGG	1267	0.144633	0.027075	0.002	0.362	4.36889e-05	0.366095	232	0.313573	0.187514	6.57895e-05	0.999987	1.84925e-07	0.999904	5.07179e-12	Monotone	TRUE	TRUE	FALSE	TRUE	TRUE	TRUE	FALSE	TRUE
pcodonTTCCTT	1267	0.145085	0.0256459	0.000157895	0.211632	1.83438e-05	0.21682	198	0.327179	0.202078	3.94737e-05	0.999947	2.45056e-08	0.999591	3.06463e-11	Monotone	TRUE	TRUE	FALSE	TRUE	TRUE	TRUE	FALSE	TRUE
pcodonTTCCTC	1267	0.116238	0.0178595	0.115	0.914	0.103755	0.910632	62	0.265989	0.087671	0.307	0.889	0.371766	0.879154	0.0194573	MIC not significant	FALSE	FALSE	FALSE	FALSE	FALSE	FALSE	FALSE	FALSE
pcodonTTCCTA	1267	0.111272	0.00908252	0.37	0.805	0.375526	0.801095	91	0.472104	0.360261	3.94737e-05	0.999987	4.05538e-09	0.999797	3.21174e-10	MIC not significant	FALSE	TRUE	FALSE	FALSE	FALSE	TRUE	FALSE	FALSE
pcodonTTCCTG	1267	0.124988	0.00187714	0.026	0.032	0.0164508	0.0222028	101	0.351548	0.320389	0.00313861	1	0.000272937	1	6.89239e-10	Monotone	FALSE	TRUE	FALSE	FALSE	FALSE	TRUE	FALSE	FALSE
pcodonTTCCCT	1267	0.152838	0.0339098	0	0.123782	3.63609e-09	0.121113	128	0.322642	0.20536	0.0129604	1	0.00463019	0.999944	7.81801e-08	Monotone	TRUE	TRUE	FALSE	TRUE	TRUE	TRUE	FALSE	TRUE
pcodonTTCCCG	1267	0.122292	0.0162127	0.065	0.696	0.0532391	0.712614	115	0.353338	0.222459	0.00264474	0.999947	0.000207836	0.998963	1.03355e-07	MIC not significant	FALSE	TRUE	FALSE	FALSE	FALSE	TRUE	FALSE	FALSE
pcodonTTCCGT	1267	0.104137	0.0063204	0.698	0.931	0.726534	0.9226	79	0.345383	0.207511	0.01775	0.998329	0.00651272	0.992244	2.46058e-05	MIC not significant	FALSE	TRUE	FALSE	FALSE	FALSE	TRUE	FALSE	FALSE
pcodonTTCCGA	1267	0.114181	0.00238537	0.137	0.189	0.126166	0.18752	47	0.453871	0.122847	0.027	0.219	0.00829071	0.242159	0.0157204	MIC not significant	FALSE	TRUE	FALSE	FALSE	FALSE	TRUE	FALSE	FALSE
pcodonTTCCGG	1267	0.111435	0.00268624	0.307	0.407	0.32554	0.429269	72	0.378527	0.236301	0.008	0.998	0.00363448	0.99536	1.92458e-05	MIC not significant	FALSE	TRUE	FALSE	FALSE	FALSE	TRUE	FALSE	FALSE
pcodonTTCATT	1267	0.150577	0.0304353	6.57895e-05	0.302882	4.04258e-06	0.314514	304	0.324552	0.177479	0	0.99604	2.44093e-15	0.987391	1.65127e-14	Monotone	TRUE	TRUE	FALSE	TRUE	TRUE	TRUE	FALSE	TRUE
pcodonTTCATC	1267	0.137735	0.00380529	0.001	0.003	0.000212555	0.000908589	134	0.423589	0.287623	0	0.999921	5.92756e-11	0.999043	2.41312e-11	Monotone	TRUE	TRUE	FALSE	TRUE	TRUE	TRUE	FALSE	TRUE
pcodonTTCATA	1267	0.115527	0.00363243	0.286	0.44	0.296556	0.438537	135	0.375851	0.200273	0.001	0.974	1.2373e-06	0.955739	5.27219e-08	MIC not significant	FALSE	TRUE	FALSE	FALSE	FALSE	TRUE	FALSE	FALSE
pcodonTTCATG	1267	0.139216	0.0148685	0.006	0.112	0.00105092	0.116814	260	0.349524	0.248004	0	1	1.0602e-14	1	1.06022e-17	Monotone	TRUE	TRUE	FALSE	TRUE	TRUE	TRUE	FALSE	TRUE
pcodonTTCACT	1267	0.116466	0.00480889	0.149	0.317	0.153012	0.328991	98	0.374804	0.302478	0.00147525	1	5.14118e-05	0.999996	4.47127e-09	MIC not significant	FALSE	TRUE	FALSE	FALSE	FALSE	TRUE	FALSE	FALSE
pcodonTTCACC	1267	0.117437	0.00746275	0.164	0.458	0.162877	0.481307	104	0.319598	0.186674	0.0539868	0.999961	0.0402419	0.999486	4.65495e-06	MIC not significant	FALSE	FALSE	FALSE	FALSE	FALSE	FALSE	FALSE	FALSE
pcodonTTCACG	1267	0.129556	0.0275066	0.013	0.917	0.0074154	0.912454	145	0.333287	0.168863	0.003	0.981	1.85178e-05	0.959096	2.83563e-07	Monotone	TRUE	TRUE	FALSE	TRUE	TRUE	TRUE	FALSE	FALSE
pcodonTTCAAT	1267	0.105743	0.00148675	0.636	0.676	0.651481	0.690308	73	0.468064	0.359264	0.000381579	0.999961	8.76466e-07	0.99946	2.10935e-08	MIC not significant	FALSE	TRUE	FALSE	FALSE	FALSE	TRUE	FALSE	FALSE
pcodonTTCAAC	1267	0.107933	0.00625092	0.477	0.789	0.498595	0.803409	68	0.441751	0.223948	0.001	0.857	0.000355204	0.844759	4.59149e-05	MIC not significant	FALSE	TRUE	FALSE	FALSE	FALSE	TRUE	FALSE	FALSE
pcodonTTCAAA	1267	0.101573	0.00184901	0.85	0.877	0.837998	0.878667	50	0.392674	0.220832	0.06	0.995	0.040437	0.973657	0.00057481	MIC not significant	FALSE	FALSE	FALSE	FALSE	FALSE	FALSE	FALSE	FALSE
pcodonTTCAAG	1267	0.149704	0.0399133	1.31579e-05	0.686974	8.26783e-07	0.697451	197	0.307109	0.198639	0.000257426	1	2.77921e-06	0.999974	5.27378e-11	Monotone	TRUE	TRUE	FALSE	TRUE	TRUE	TRUE	FALSE	TRUE
pcodonTTCAGT	1267	0.101094	0.00151147	0.856	0.886	0.851861	0.877848	67	0.505604	0.432002	0.00039604	1	7.00752e-07	0.999984	1.52827e-09	MIC not significant	FALSE	TRUE	FALSE	FALSE	FALSE	TRUE	FALSE	FALSE
pcodonTTCAGC	1267	0.116202	0.00441381	0.18	0.337	0.187867	0.349536	110	0.468763	0.366697	0	1	2.05207e-11	0.999977	2.41278e-12	MIC not significant	FALSE	TRUE	FALSE	FALSE	FALSE	TRUE	FALSE	FALSE
pcodonTTCAGA	1267	0.107292	0.00385704	0.532	0.726	0.553243	0.727319	69	0.494082	0.320572	0.000302632	0.989605	6.75858e-07	0.973108	3.96878e-07	MIC not significant	FALSE	TRUE	FALSE	FALSE	FALSE	TRUE	FALSE	FALSE
pcodonTTCAGG	1267	0.128977	0.0314379	0.028	0.987	0.0199448	0.979496	179	0.291201	0.162183	0.00861386	1	0.00232572	0.999783	2.28707e-08	Monotone	FALSE	TRUE	FALSE	FALSE	FALSE	TRUE	FALSE	FALSE
pcodonTTCGTC	1267	0.145271	0.0303402	3.94737e-05	0.275395	1.52858e-06	0.285444	134	0.353841	0.334522	0.000881188	1	2.45495e-05	1	2.50733e-13	Monotone	TRUE	TRUE	FALSE	TRUE	TRUE	TRUE	FALSE	TRUE
pcodonTTCGTG	1267	0.110865	0.00929627	0.562	0.917	0.586278	0.9143	143	0.351767	0.277851	0.000316832	1	1.57719e-06	1	1.34976e-11	MIC not significant	FALSE	TRUE	FALSE	FALSE	FALSE	TRUE	FALSE	FALSE
pcodonTTCGCT	1267	0.113785	0.00036447	0.225	0.199	0.239024	0.21962	94	0.413056	0.350352	0.000455446	1	3.65266e-06	0.999999	3.32365e-10	MIC not significant	FALSE	TRUE	FALSE	FALSE	FALSE	TRUE	FALSE	FALSE
pcodonTTCGCC	1267	0.126688	0.0224687	0.022	0.786	0.0144824	0.795744	118	0.260052	0.121159	0.199	0.999	0.208206	0.99658	0.000112297	MIC not significant	FALSE	FALSE	FALSE	FALSE	FALSE	FALSE	FALSE	FALSE
pcodonTTCGCA	1267	0.115277	0.00172362	0.092	0.113	0.0819994	0.106237	44	0.437734	0.269921	0.005	0.933	0.000756702	0.902909	0.000301498	MIC not significant	FALSE	TRUE	FALSE	FALSE	FALSE	TRUE	FALSE	FALSE
pcodonTTCGCG	1267	0.127931	0.0247235	0.03	0.895	0.0238892	0.892187	163	0.37792	0.290976	9.90099e-06	1	3.62003e-10	1	1.09114e-13	Monotone	FALSE	TRUE	FALSE	FALSE	FALSE	TRUE	FALSE	FALSE
pcodonTTCGAA	1267	0.140275	0.0141855	0	0.00607921	1.01841e-06	0.00275088	76	0.513414	0.296407	2.63158e-05	0.706118	3.12161e-10	0.72261	3.69947e-07	non-significant monotone/non-monotone	TRUE	TRUE	FALSE	FALSE	TRUE	TRUE	FALSE	FALSE
pcodonTTCGAG	1267	0.102681	0.00458066	0.789	0.932	0.798526	0.924109	70	0.300435	0.179247	0.221	0.999829	0.245442	0.99878	0.000260429	MIC not significant	FALSE	FALSE	FALSE	FALSE	FALSE	FALSE	FALSE	FALSE
pcodonTTCGGT	1267	0.13791	0.0209491	0.00130263	0.246408	0.000322031	0.255935	162	0.393026	0.279572	1.9802e-05	1	1.82693e-11	0.999958	4.74853e-13	Monotone	TRUE	TRUE	FALSE	TRUE	TRUE	TRUE	FALSE	TRUE
pcodonTTCGGC	1267	0.123815	0.0224191	0.047	0.91	0.0433741	0.899183	125	0.281748	0.149199	0.133763	0.999961	0.133998	0.999685	8.62335e-06	MIC not significant	FALSE	FALSE	FALSE	FALSE	FALSE	FALSE	FALSE	FALSE
pcodonTTCGGA	1267	0.147389	0.0277403	7.89474e-05	0.212579	4.85491e-06	0.217807	205	0.300162	0.177745	0.00121782	1	6.78709e-05	0.999946	3.06628e-10	Monotone	TRUE	TRUE	FALSE	TRUE	TRUE	TRUE	FALSE	TRUE
pcodonTTCGGG	1267	0.126636	0.0208955	0.03	0.79	0.0242406	0.800913	156	0.350385	0.240081	0.000277228	1	2.59282e-06	0.999985	8.47155e-11	Monotone	FALSE	TRUE	FALSE	FALSE	FALSE	TRUE	FALSE	FALSE
pcodonTTATTT	1267	0.147408	0.00793129	0.002	0.008	0.000236357	0.00473103	492	0.257854	0.18885	0	1	5.54414e-15	1	4.41236e-24	Monotone	TRUE	TRUE	FALSE	TRUE	TRUE	TRUE	FALSE	TRUE
pcodonTTATTC	1267	0.137626	0.021895	0.001	0.472	0.00133833	0.486018	251	0.377886	0.229595	0	0.99503	9.56843e-22	0.986145	8.20014e-16	Monotone	TRUE	TRUE	FALSE	TRUE	TRUE	TRUE	FALSE	TRUE
pcodonTTATTA	1267	0.153497	0.00868534	1.31579e-05	0.000736842	2.62569e-06	0.000219341	450	0.289585	0.185166	0	1	7.94009e-21	0.999998	1.04147e-21	Monotone	TRUE	TRUE	FALSE	TRUE	TRUE	TRUE	FALSE	TRUE
pcodonTTATTG	1267	0.132586	0.0110073	0.022	0.235	0.0182894	0.243468	298	0.315528	0.248339	0	1	8.02009e-13	1	4.12427e-20	Monotone	FALSE	TRUE	FALSE	FALSE	FALSE	TRUE	FALSE	FALSE
pcodonTTATCT	1267	0.127551	0.00926119	0.036	0.25	0.0317701	0.241494	195	0.338856	0.247996	9.90099e-06	1	3.19497e-09	0.999999	1.28861e-13	Monotone	FALSE	TRUE	FALSE	FALSE	FALSE	TRUE	FALSE	FALSE
pcodonTTATCC	1267	0.110979	0.0214082	0.537	0.999	0.551968	0.998468	145	0.332665	0.266347	0.00070297	1	1.9901e-05	1	3.05829e-11	MIC not significant	FALSE	TRUE	FALSE	FALSE	FALSE	TRUE	FALSE	FALSE
pcodonTTATCA	1267	0.11565	0.00455495	0.116	0.257	0.112569	0.262327	67	0.570351	0.279776	1.31579e-05	0.267658	3.12231e-10	0.298345	4.19519e-06	MIC not significant	FALSE	TRUE	FALSE	FALSE	FALSE	TRUE	FALSE	FALSE
pcodonTTATCG	1267	0.143897	0.0257628	0.000210526	0.256039	3.18554e-05	0.263491	193	0.301318	0.196472	0.000722772	1	2.6962e-05	0.999991	1.07908e-10	Monotone	TRUE	TRUE	FALSE	TRUE	TRUE	TRUE	FALSE	TRUE
pcodonTTATAT	1267	0.150114	0.0200392	3.94737e-05	0.0240395	1.42341e-06	0.0178322	222	0.315096	0.233198	1.9802e-05	1	2.59099e-08	1	2.2664e-14	Monotone	TRUE	TRUE	FALSE	TRUE	TRUE	TRUE	FALSE	TRUE
pcodonTTATAC	1267	0.120068	0.00257207	0.072	0.117	0.0670472	0.10564	93	0.391149	0.158664	0.003	0.54	4.60814e-05	0.580151	7.67549e-05	MIC not significant	FALSE	TRUE	FALSE	FALSE	FALSE	TRUE	FALSE	FALSE
pcodonTTATAA	1267	0.107616	0.000820447	0.61	0.613	0.629174	0.633823	108	0.391053	0.288914	0.00101316	0.999987	2.13278e-05	0.999979	1.99686e-09	MIC not significant	FALSE	TRUE	FALSE	FALSE	FALSE	TRUE	FALSE	FALSE
pcodonTTATAG	1267	0.135326	0.0223276	0.002	0.29	0.000219865	0.307421	105	0.345721	0.199335	0.0151053	0.999711	0.00533927	0.99797	1.80762e-06	Monotone	TRUE	TRUE	FALSE	TRUE	TRUE	TRUE	FALSE	TRUE
pcodonTTATGT	1267	0.111053	0.0017417	0.519	0.573	0.525969	0.576061	134	0.356387	0.329755	0.000693069	1	1.93656e-05	1	4.04365e-13	MIC not significant	FALSE	TRUE	FALSE	FALSE	FALSE	TRUE	FALSE	FALSE
pcodonTTATGC	1267	0.119077	0.00860534	0.221	0.626	0.244359	0.641598	192	0.331126	0.244247	8.91089e-05	1	5.83638e-08	1	3.21672e-13	MIC not significant	FALSE	TRUE	FALSE	FALSE	FALSE	TRUE	FALSE	FALSE
pcodonTTATGA	1267	0.118069	0.0045823	0.179	0.348	0.18578	0.360389	137	0.316413	0.221592	0.00685149	1	0.00141611	0.999996	6.44435e-09	MIC not significant	FALSE	TRUE	FALSE	FALSE	FALSE	TRUE	FALSE	FALSE
pcodonTTATGG	1267	0.149427	0.021951	3.94737e-05	0.0594605	4.09331e-06	0.0528559	259	0.321569	0.172432	0	0.998941	4.51109e-10	0.994731	3.22343e-12	Monotone	TRUE	TRUE	FALSE	TRUE	TRUE	TRUE	FALSE	TRUE
pcodonTTACTT	1267	0.127492	0.00402601	0.095	0.162	0.0869677	0.174577	284	0.392047	0.309221	0	1	1.30092e-30	1	1.88261e-24	MIC not significant	FALSE	TRUE	FALSE	FALSE	FALSE	TRUE	FALSE	FALSE
pcodonTTACTC	1267	0.114412	0.011039	0.21	0.755	0.209618	0.758401	78	0.327817	0.156607	0.04	0.972	0.0289945	0.942458	0.000335536	MIC not significant	FALSE	FALSE	FALSE	FALSE	FALSE	TRUE	FALSE	FALSE
pcodonTTACTA	1267	0.113286	0.003409	0.344	0.493	0.362832	0.507813	116	0.443833	0.348623	9.90099e-06	1	6.91913e-11	0.999985	3.04143e-12	MIC not significant	FALSE	TRUE	FALSE	FALSE	FALSE	TRUE	FALSE	FALSE
pcodonTTACTG	1267	0.109016	0.00570323	0.653	0.877	0.671226	0.868657	143	0.374072	0.27224	8.91089e-05	1	2.33406e-08	0.999982	2.35212e-11	MIC not significant	FALSE	TRUE	FALSE	FALSE	FALSE	TRUE	FALSE	FALSE
pcodonTTACCT	1267	0.147562	0.0178163	2.63158e-05	0.0171974	2.53074e-06	0.0116991	184	0.35001	0.199226	2.63158e-05	0.999145	1.88596e-08	0.994747	2.14781e-10	Monotone	TRUE	TRUE	FALSE	TRUE	TRUE	TRUE	FALSE	TRUE
pcodonTTACCC	1267	0.103839	0.0050899	0.735	0.918	0.731375	0.906929	59	0.40346	0.289364	0.00847368	0.999118	0.00138401	0.996632	1.11373e-05	MIC not significant	FALSE	TRUE	FALSE	FALSE	FALSE	TRUE	FALSE	FALSE
pcodonTTACCA	1267	0.111854	0.000516404	0.21	0.195	0.2254	0.208568	40	0.574725	0.364325	0.001	0.783	1.15836e-06	0.781672	3.73787e-05	MIC not significant	FALSE	TRUE	FALSE	FALSE	FALSE	TRUE	FALSE	FALSE
pcodonTTACCG	1267	0.12556	0.0197394	0.035	0.763	0.0273271	0.763723	138	0.340954	0.244212	0.00133663	1	5.22876e-05	0.999994	7.28523e-10	Monotone	FALSE	TRUE	FALSE	FALSE	FALSE	TRUE	FALSE	FALSE
pcodonTTACAG	1267	0.112639	0.0042663	0.243	0.417	0.248485	0.433182	69	0.461907	0.210199	0.002	0.538	8.8815e-06	0.557549	7.44178e-05	MIC not significant	FALSE	TRUE	FALSE	FALSE	FALSE	TRUE	FALSE	FALSE
pcodonTTACGT	1267	0.116958	0.0171193	0.217	0.949	0.214144	0.935961	129	0.355239	0.240592	0.00186139	1	0.000102854	0.999946	3.61959e-09	MIC not significant	FALSE	TRUE	FALSE	FALSE	FALSE	TRUE	FALSE	FALSE
pcodonTTACGA	1267	0.108515	0.00199118	0.567	0.642	0.5858	0.649867	108	0.399419	0.243811	0.000460526	0.998842	5.73326e-06	0.994071	5.6294e-08	MIC not significant	FALSE	TRUE	FALSE	FALSE	FALSE	TRUE	FALSE	FALSE
pcodonTTACGG	1267	0.100953	0.00270085	0.918	0.957	0.908586	0.946118	115	0.467505	0.358773	0	1	9.3248e-13	0.999925	1.53706e-12	MIC not significant	FALSE	TRUE	FALSE	FALSE	FALSE	TRUE	FALSE	FALSE
pcodonTTAATT	1267	0.145566	0.0153323	0.001	0.069	0.000274558	0.0637503	500	0.229809	0.151756	1.9802e-05	1	5.65689e-09	1	1.44366e-19	Monotone	TRUE	TRUE	FALSE	TRUE	TRUE	TRUE	FALSE	TRUE
pcodonTTAATC	1267	0.144459	0.0199512	0.001	0.131	0.000147869	0.135341	267	0.302319	0.233603	9.90099e-06	1	1.23756e-08	1	4.90445e-17	Monotone	TRUE	TRUE	FALSE	TRUE	TRUE	TRUE	FALSE	TRUE
pcodonTTAATA	1267	0.116125	0.0107236	0.459	0.894	0.463154	0.894633	225	0.270274	0.208522	0.00266337	1	0.000297016	1	5.45278e-13	MIC not significant	FALSE	TRUE	FALSE	FALSE	FALSE	TRUE	FALSE	FALSE
pcodonTTAATG	1267	0.145227	0.0176548	0.003	0.082	0.000151656	0.0842775	357	0.352971	0.237912	0	1	2.80856e-27	0.999987	9.78101e-23	Monotone	TRUE	TRUE	FALSE	TRUE	TRUE	TRUE	FALSE	TRUE
pcodonTTAACT	1267	0.144234	0.0141385	0.000131579	0.0145	1.65057e-05	0.0092967	176	0.376553	0.267977	9.90099e-06	1	6.11985e-10	0.999995	1.87993e-13	Monotone	TRUE	TRUE	FALSE	TRUE	TRUE	TRUE	FALSE	TRUE
pcodonTTAACC	1267	0.155358	0.0354261	0	0.130257	1.82708e-09	0.128119	152	0.364002	0.249269	0.000178218	1	9.35274e-07	0.99998	5.86045e-11	Monotone	TRUE	TRUE	FALSE	TRUE	TRUE	TRUE	FALSE	TRUE
pcodonTTAACA	1267	0.116669	0.00777119	0.123	0.422	0.122096	0.441385	75	0.414566	0.367215	0.00208911	1	9.36818e-05	0.999999	8.36943e-09	MIC not significant	FALSE	TRUE	FALSE	FALSE	FALSE	TRUE	FALSE	FALSE
pcodonTTAACG	1267	0.152619	0.0261276	9.90099e-06	0.0655743	3.38103e-07	0.0593522	238	0.317491	0.177198	5.26316e-05	0.999803	1.21514e-08	0.998227	1.22332e-11	Monotone	TRUE	TRUE	FALSE	TRUE	TRUE	TRUE	FALSE	TRUE
pcodonTTAAAT	1267	0.1149	0.00247894	0.229	0.314	0.247389	0.327427	105	0.422609	0.337816	0.000287129	1	1.15648e-06	0.999998	7.99388e-11	MIC not significant	FALSE	TRUE	FALSE	FALSE	FALSE	TRUE	FALSE	FALSE
pcodonTTAAAC	1267	0.116433	0.00644198	0.162	0.426	0.167165	0.443982	103	0.388393	0.301759	0.00242574	1	0.000172533	0.999998	1.8702e-09	MIC not significant	FALSE	TRUE	FALSE	FALSE	FALSE	TRUE	FALSE	FALSE
pcodonTTAAAA	1267	0.114247	0.00887895	0.12	0.562	0.120992	0.581693	49	0.428271	0.153304	0.025	0.493	0.0113516	0.530799	0.00540158	MIC not significant	FALSE	TRUE	FALSE	FALSE	FALSE	TRUE	FALSE	FALSE
pcodonTTAAAG	1267	0.153218	0.0279954	9.90099e-06	0.0868515	2.24369e-07	0.0822606	235	0.333414	0.144426	9.90099e-06	0.711356	2.24151e-10	0.724361	1.72041e-09	non-significant monotone/non-monotone	TRUE	TRUE	FALSE	FALSE	TRUE	TRUE	FALSE	FALSE
pcodonTTAAGT	1267	0.121643	0.00101813	0.036	0.039	0.0281471	0.0309929	84	0.511078	0.366083	9.90099e-06	0.999752	1.79996e-09	0.997671	1.08817e-09	Monotone	FALSE	TRUE	FALSE	FALSE	FALSE	TRUE	FALSE	FALSE
pcodonTTAAGC	1267	0.131428	0.0241466	0.003	0.654	0.00269576	0.673833	124	0.347423	0.240138	0.00549505	1	0.00101894	0.999989	7.62043e-09	Monotone	TRUE	TRUE	FALSE	TRUE	TRUE	TRUE	FALSE	TRUE
pcodonTTAAGA	1267	0.113192	0.00696045	0.206	0.51	0.208255	0.55294	65	0.490411	0.343424	0.000842105	0.999342	1.03171e-05	0.995643	2.9183e-07	MIC not significant	FALSE	TRUE	FALSE	FALSE	FALSE	TRUE	FALSE	FALSE
pcodonTTAAGG	1267	0.134879	0.022315	0.007	0.615	0.00515199	0.620396	224	0.276027	0.211242	0.00148515	1	0.000111299	1	4.16555e-13	Monotone	TRUE	TRUE	FALSE	TRUE	TRUE	TRUE	FALSE	TRUE
pcodonTTAGTC	1267	0.114671	0.00812817	0.368	0.752	0.378413	0.76275	150	0.317008	0.173239	0.00664474	0.999882	0.00148803	0.99879	1.17489e-07	MIC not significant	FALSE	TRUE	FALSE	FALSE	FALSE	TRUE	FALSE	FALSE
pcodonTTAGTG	1267	0.118281	0.0058599	0.212	0.445	0.217192	0.4702	157	0.436524	0.271296	0	0.993079	2.3593e-15	0.981748	2.69108e-12	MIC not significant	FALSE	TRUE	FALSE	FALSE	FALSE	TRUE	FALSE	FALSE
pcodonTTAGCT	1267	0.124757	0.00941244	0.032	0.212	0.0230136	0.225054	122	0.310732	0.224491	0.0115149	1	0.00310607	0.999993	3.5441e-08	Monotone	FALSE	TRUE	FALSE	FALSE	FALSE	TRUE	FALSE	FALSE
pcodonTTAGCC	1267	0.118044	0.0150374	0.098	0.771	0.0867679	0.772078	88	0.321981	0.158399	0.057	0.997	0.0492234	0.98945	0.000123013	MIC not significant	FALSE	FALSE	FALSE	FALSE	FALSE	FALSE	FALSE	FALSE
pcodonTTAGCA	1267	0.101317	0.00113113	0.84	0.867	0.844645	0.859743	42	0.359588	0.352523	0.0795658	0.999987	0.0682286	0.999987	3.40222e-05	MIC not significant	FALSE	FALSE	FALSE	FALSE	FALSE	FALSE	FALSE	FALSE
pcodonTTAGCG	1267	0.111467	0.0111497	0.522	0.945	0.544192	0.937608	147	0.367753	0.256315	6.57895e-05	0.999987	1.60183e-08	0.999891	6.07596e-11	MIC not significant	FALSE	TRUE	FALSE	FALSE	FALSE	TRUE	FALSE	FALSE
pcodonTTAGAA	1267	0.112177	0.00107433	0.261	0.272	0.262846	0.279874	63	0.453893	0.360738	0.00575	0.999974	0.00069408	0.999934	3.67838e-07	MIC not significant	FALSE	TRUE	FALSE	FALSE	FALSE	TRUE	FALSE	FALSE
pcodonTTAGAG	1267	0.0914398	0.000266962	0.999	0.999	0.996665	0.995873	52	0.507814	0.267257	0.004	0.661	3.47678e-05	0.693537	8.71108e-05	MIC not significant	FALSE	TRUE	FALSE	FALSE	FALSE	TRUE	FALSE	FALSE
pcodonTTAGGT	1267	0.126363	0.012988	0.048	0.434	0.0368658	0.457018	174	0.45227	0.33118	0	1	3.00323e-19	0.999962	9.89067e-17	Monotone	FALSE	TRUE	FALSE	FALSE	FALSE	TRUE	FALSE	FALSE
pcodonTTAGGC	1267	0.122202	0.0100789	0.136	0.563	0.14242	0.568993	191	0.343571	0.226102	9.90099e-06	1	5.19812e-09	0.999918	3.62339e-12	MIC not significant	FALSE	TRUE	FALSE	FALSE	FALSE	TRUE	FALSE	FALSE
pcodonTTAGGA	1267	0.135219	0.0163197	0.007	0.312	0.00476931	0.30262	235	0.328677	0.209823	9.90099e-06	1	1.36547e-09	0.999968	1.3648e-13	Monotone	TRUE	TRUE	FALSE	TRUE	TRUE	TRUE	FALSE	TRUE
pcodonTTAGGG	1267	0.131076	0.0156325	0.02	0.452	0.0182938	0.461809	229	0.383841	0.338941	0	1	1.07236e-16	1	3.56489e-22	Monotone	FALSE	TRUE	FALSE	FALSE	FALSE	TRUE	FALSE	FALSE
pcodonTTGTTT	1267	0.130141	7.96506e-05	0.059	0.047	0.0491507	0.0389285	302	0.420046	0.312107	0	1	1.46928e-40	0.999997	3.47414e-26	MIC not significant	FALSE	TRUE	FALSE	FALSE	FALSE	TRUE	FALSE	FALSE
pcodonTTGTTC	1267	0.12049	0.00699234	0.258	0.551	0.247918	0.564235	233	0.349606	0.278705	0	1	4.2514e-12	1	4.02203e-18	MIC not significant	FALSE	TRUE	FALSE	FALSE	FALSE	TRUE	FALSE	FALSE
pcodonTTGTTA	1267	0.114351	0.000413748	0.542	0.529	0.558475	0.538866	234	0.395061	0.305789	0	1	2.77315e-20	1	3.84485e-20	MIC not significant	FALSE	TRUE	FALSE	FALSE	FALSE	TRUE	FALSE	FALSE
pcodonTTGTTG	1267	0.139634	0.0047379	0.002	0.01	0.00123226	0.00568779	278	0.322124	0.260958	0	1	3.59127e-13	1	6.99602e-20	Monotone	TRUE	TRUE	FALSE	TRUE	TRUE	TRUE	FALSE	TRUE
pcodonTTGTCT	1267	0.100142	0.00143826	0.967	0.974	0.953993	0.963137	141	0.441895	0.337928	0	1	4.64704e-15	0.999975	4.09557e-14	MIC not significant	FALSE	TRUE	FALSE	FALSE	FALSE	TRUE	FALSE	FALSE
pcodonTTGTCC	1267	0.112872	0.0107918	0.317	0.838	0.341047	0.84422	101	0.334754	0.204602	0.00851316	0.999645	0.00171878	0.997134	2.0471e-06	MIC not significant	FALSE	TRUE	FALSE	FALSE	FALSE	TRUE	FALSE	FALSE
pcodonTTGTCA	1267	0.0992982	0.000628469	0.911	0.91	0.907073	0.902059	67	0.362424	0.177167	0.04	0.973	0.0358769	0.95992	0.000389985	MIC not significant	FALSE	FALSE	FALSE	FALSE	FALSE	FALSE	FALSE	FALSE
pcodonTTGTCG	1267	0.134859	0.0200125	0.003	0.342	0.0015245	0.340624	153	0.384159	0.274249	4.9505e-05	1	1.11892e-08	0.999987	3.75763e-12	Monotone	TRUE	TRUE	FALSE	TRUE	TRUE	TRUE	FALSE	TRUE
pcodonTTGTAT	1267	0.129934	0.0106046	0.011	0.147	0.00817593	0.150205	158	0.305587	0.283459	0.00624752	1	0.00141172	1	6.03291e-13	Monotone	TRUE	TRUE	FALSE	TRUE	TRUE	TRUE	FALSE	TRUE
pcodonTTGTAC	1267	0.11498	0.0054524	0.193	0.406	0.200376	0.425589	87	0.494458	0.42478	3.9604e-05	1	1.99918e-09	0.999998	8.09624e-12	MIC not significant	FALSE	TRUE	FALSE	FALSE	FALSE	TRUE	FALSE	FALSE
pcodonTTGTAA	1267	0.10251	0.000293959	0.777	0.757	0.793076	0.773592	65	0.494329	0.298912	0.003	0.976	4.75491e-05	0.941149	2.45542e-06	MIC not significant	FALSE	TRUE	FALSE	FALSE	FALSE	TRUE	FALSE	FALSE
pcodonTTGTAG	1267	0.105756	0.00416899	0.784	0.897	0.786888	0.894711	130	0.373891	0.276902	0.00039604	1	5.66994e-06	0.999997	1.27819e-10	MIC not significant	FALSE	TRUE	FALSE	FALSE	FALSE	TRUE	FALSE	FALSE
pcodonTTGTGT	1267	0.110629	0.000535196	0.49	0.473	0.506616	0.489104	120	0.397899	0.303187	0.000118421	0.999987	3.843e-08	0.999982	7.24624e-11	MIC not significant	FALSE	TRUE	FALSE	FALSE	FALSE	TRUE	FALSE	FALSE
pcodonTTGTGC	1267	0.136048	0.0142549	0.002	0.103	0.000835638	0.0993221	170	0.340048	0.28403	2.9703e-05	1	1.03883e-07	1	7.36059e-14	Monotone	TRUE	TRUE	FALSE	TRUE	TRUE	TRUE	FALSE	TRUE
pcodonTTGTGA	1267	0.122347	0.013569	0.105	0.665	0.0975947	0.684053	157	0.284031	0.145793	0.0288421	0.999961	0.0164627	0.999102	8.04278e-07	MIC not significant	FALSE	TRUE	FALSE	FALSE	FALSE	TRUE	FALSE	FALSE
pcodonTTGTGG	1267	0.146034	0.0180655	0.001	0.058	4.15966e-05	0.0504549	266	0.394246	0.318918	0	1	1.23465e-25	1	8.27568e-24	Monotone	TRUE	TRUE	FALSE	TRUE	TRUE	TRUE	FALSE	TRUE
pcodonTTGCTT	1267	0.140925	0.0230741	0.001	0.243	0.000181696	0.265633	185	0.41194	0.315548	0	1	8.52411e-17	0.999999	8.9023e-17	Monotone	TRUE	TRUE	FALSE	TRUE	TRUE	TRUE	FALSE	TRUE
pcodonTTGCTC	1267	0.106553	0.0101572	0.584	0.959	0.580866	0.952044	63	0.459234	0.214276	0.003	0.774	0.000376305	0.771137	0.000133448	MIC not significant	FALSE	TRUE	FALSE	FALSE	FALSE	TRUE	FALSE	FALSE
pcodonTTGCTA	1267	0.0990135	0.000132537	0.926	0.915	0.912752	0.898823	78	0.407345	0.365839	0.00148515	1	4.55255e-05	0.999999	4.49652e-09	MIC not significant	FALSE	TRUE	FALSE	FALSE	FALSE	TRUE	FALSE	FALSE
pcodonTTGCTG	1267	0.107441	0.00830653	0.572	0.913	0.597156	0.907219	95	0.467012	0.262766	1.9802e-05	0.800703	4.29012e-10	0.80038	1.09242e-07	MIC not significant	FALSE	TRUE	FALSE	FALSE	FALSE	TRUE	FALSE	FALSE
pcodonTTGCCT	1267	0.134464	0.0291274	0.001	0.81	0.00110319	0.808762	156	0.337685	0.230614	0.000732673	1	1.85035e-05	0.999991	2.24024e-10	Monotone	TRUE	TRUE	FALSE	TRUE	TRUE	TRUE	FALSE	TRUE
pcodonTTGCCC	1267	0.11244	0.00267851	0.203	0.277	0.207866	0.302541	54	0.355291	0.130744	0.083	0.752	0.0749266	0.757252	0.00722085	MIC not significant	FALSE	FALSE	FALSE	FALSE	FALSE	FALSE	FALSE	FALSE
pcodonTTGCCA	1267	0.102799	0.00421288	0.76	0.922	0.778932	0.912099	54	0.427251	0.275871	0.007	0.992	0.00185149	0.984242	4.54604e-05	MIC not significant	FALSE	TRUE	FALSE	FALSE	FALSE	TRUE	FALSE	FALSE
pcodonTTGCCG	1267	0.117609	0.0157709	0.204	0.886	0.213236	0.888882	133	0.358035	0.294079	0.000732673	1	1.69082e-05	1	1.56412e-11	MIC not significant	FALSE	TRUE	FALSE	FALSE	FALSE	TRUE	FALSE	FALSE
pcodonTTGCAG	1267	0.111062	0.00817855	0.287	0.714	0.28789	0.73165	54	0.334	0.270244	0.140683	0.99999	0.144704	0.999935	5.61075e-05	MIC not significant	FALSE	FALSE	FALSE	FALSE	FALSE	FALSE	FALSE	FALSE
pcodonTTGCGT	1267	0.116394	0.0207124	0.158	0.981	0.156652	0.973102	99	0.321088	0.140281	0.018	0.94	0.00650664	0.928189	0.000133832	MIC not significant	FALSE	TRUE	FALSE	FALSE	FALSE	TRUE	FALSE	FALSE
pcodonTTGCGC	1267	0.11113	0.00158716	0.231	0.277	0.24753	0.295111	43	0.682122	0.564583	0	0.996327	3.34758e-13	0.98743	6.41374e-09	MIC not significant	FALSE	TRUE	FALSE	FALSE	FALSE	TRUE	FALSE	FALSE
pcodonTTGCGA	1267	0.10248	0.00410257	0.794	0.917	0.804137	0.915682	70	0.515263	0.417471	0.000118421	0.999987	2.9616e-08	0.999847	1.59815e-09	MIC not significant	FALSE	TRUE	FALSE	FALSE	FALSE	TRUE	FALSE	FALSE
pcodonTTGCGG	1267	0.113213	0.0024665	0.231	0.321	0.23801	0.321999	84	0.484761	0.414107	6.93069e-05	1	6.7733e-08	0.999999	4.06125e-11	MIC not significant	FALSE	TRUE	FALSE	FALSE	FALSE	TRUE	FALSE	FALSE
pcodonTTGATT	1267	0.144871	0.0175337	0.001	0.106	0.000300828	0.109535	438	0.273962	0.179559	0	1	1.65322e-14	1	1.63203e-20	Monotone	TRUE	TRUE	FALSE	TRUE	TRUE	TRUE	FALSE	TRUE
pcodonTTGATC	1267	0.135763	0.0174003	0.005	0.311	0.00362367	0.326016	244	0.325356	0.241792	0	1	1.19171e-10	1	2.9299e-16	Monotone	TRUE	TRUE	FALSE	TRUE	TRUE	TRUE	FALSE	TRUE
pcodonTTGATA	1267	0.124396	0.00524873	0.121	0.256	0.114054	0.267306	221	0.385276	0.3648	0	1	1.39327e-18	1	2.32015e-23	MIC not significant	FALSE	TRUE	FALSE	FALSE	FALSE	TRUE	FALSE	FALSE
pcodonTTGATG	1267	0.130677	0.0131385	0.037	0.43	0.0328451	0.444189	326	0.299713	0.210604	0	1	1.22153e-11	1	2.19524e-18	Monotone	FALSE	TRUE	FALSE	FALSE	FALSE	TRUE	FALSE	FALSE
pcodonTTGACT	1267	0.127671	0.00557137	0.029	0.117	0.0279581	0.106314	188	0.269359	0.201669	0.0171584	1	0.00779797	1	1.01998e-10	Monotone	FALSE	TRUE	FALSE	FALSE	FALSE	TRUE	FALSE	FALSE
pcodonTTGACC	1267	0.138256	0.0275175	0.001	0.579	0.000349413	0.589339	165	0.351166	0.272893	7.92079e-05	1	8.92763e-08	1	6.17548e-13	Monotone	TRUE	TRUE	FALSE	TRUE	TRUE	TRUE	FALSE	TRUE
pcodonTTGACA	1267	0.110215	0.00493337	0.352	0.6	0.386904	0.626052	78	0.485459	0.387629	2.9703e-05	0.999941	2.55571e-09	0.999661	1.1589e-09	MIC not significant	FALSE	TRUE	FALSE	FALSE	FALSE	TRUE	FALSE	FALSE
pcodonTTGACG	1267	0.135403	0.0349988	0.004	0.987	0.00495585	0.983072	242	0.309624	0.25798	3.9604e-05	1	2.23095e-08	1	2.8214e-17	Monotone	TRUE	TRUE	FALSE	TRUE	TRUE	TRUE	FALSE	TRUE
pcodonTTGAAT	1267	0.116898	0.00152979	0.249	0.277	0.253893	0.285487	144	0.334573	0.274048	0.000831683	1	2.32243e-05	1	1.67087e-11	MIC not significant	FALSE	TRUE	FALSE	FALSE	FALSE	TRUE	FALSE	FALSE
pcodonTTGAAC	1267	0.128654	0.0112021	0.011	0.171	0.00810353	0.176652	135	0.490686	0.349885	0	0.999782	6.86491e-19	0.998061	4.21984e-14	Monotone	TRUE	TRUE	FALSE	TRUE	TRUE	TRUE	FALSE	TRUE
pcodonTTGAAA	1267	0.110035	0.00189153	0.387	0.461	0.413486	0.471034	77	0.396582	0.170166	0.006	0.57	0.000270141	0.616518	0.000192986	MIC not significant	FALSE	TRUE	FALSE	FALSE	FALSE	TRUE	FALSE	FALSE
pcodonTTGAAG	1267	0.143256	0.0286378	0.002	0.565	0.00023618	0.581789	291	0.351953	0.219056	0	1	1.76494e-18	0.999502	3.01477e-17	Monotone	TRUE	TRUE	FALSE	TRUE	TRUE	TRUE	FALSE	TRUE
pcodonTTGAGT	1267	0.109119	0.00161342	0.537	0.583	0.553906	0.599245	100	0.371906	0.376946	0.00160396	1	4.67987e-05	1	1.10136e-11	MIC not significant	FALSE	TRUE	FALSE	FALSE	FALSE	TRUE	FALSE	FALSE
pcodonTTGAGC	1267	0.128968	0.0153369	0.016	0.34	0.00845724	0.355397	138	0.487104	0.323284	0	0.991139	8.43948e-20	0.978159	3.47407e-13	Monotone	FALSE	TRUE	FALSE	FALSE	TRUE	TRUE	FALSE	TRUE
pcodonTTGAGA	1267	0.110983	0.00205289	0.455	0.531	0.475873	0.545712	113	0.37056	0.33107	0.00122772	1	4.78143e-05	1	2.62729e-11	MIC not significant	FALSE	TRUE	FALSE	FALSE	FALSE	TRUE	FALSE	FALSE
pcodonTTGAGG	1267	0.122734	0.0166853	0.177	0.889	0.176327	0.889221	246	0.312872	0.225372	9.90099e-06	1	2.66748e-09	1	3.12489e-15	MIC not significant	FALSE	TRUE	FALSE	FALSE	FALSE	TRUE	FALSE	FALSE
pcodonTTGGTC	1267	0.106635	0.00507063	0.695	0.868	0.694428	0.866874	114	0.477086	0.35705	0	0.99999	1.71936e-13	0.999702	2.24546e-12	MIC not significant	FALSE	TRUE	FALSE	FALSE	FALSE	TRUE	FALSE	FALSE
pcodonTTGGTG	1267	0.115332	0.0016614	0.306	0.349	0.312383	0.357281	145	0.470674	0.375636	0	1	4.58243e-20	0.999991	2.54162e-16	MIC not significant	FALSE	TRUE	FALSE	FALSE	FALSE	TRUE	FALSE	FALSE
pcodonTTGGCT	1267	0.115063	0.00948426	0.366	0.822	0.395537	0.820891	152	0.474111	0.363514	0	1	1.1483e-18	0.999988	2.05204e-16	MIC not significant	FALSE	TRUE	FALSE	FALSE	FALSE	TRUE	FALSE	FALSE
pcodonTTGGCC	1267	0.126032	0.0174292	0.033	0.581	0.0218021	0.609731	129	0.364357	0.193763	0.001	0.996	3.09953e-05	0.980758	1.79012e-07	Monotone	FALSE	TRUE	FALSE	FALSE	FALSE	TRUE	FALSE	FALSE
pcodonTTGGCA	1267	0.0999728	0.00127921	0.894	0.912	0.89502	0.909759	74	0.484816	0.313787	0.000171053	0.983303	5.1302e-08	0.963941	2.10836e-07	MIC not significant	FALSE	TRUE	FALSE	FALSE	FALSE	TRUE	FALSE	FALSE
pcodonTTGGCG	1267	0.132117	0.0177456	0.015	0.465	0.0102223	0.490881	220	0.316383	0.176937	5.26316e-05	0.999803	3.40535e-08	0.997393	7.61641e-11	Monotone	FALSE	TRUE	FALSE	FALSE	TRUE	TRUE	FALSE	TRUE
pcodonTTGGAA	1267	0.118612	0.0026083	0.1	0.143	0.098763	0.146776	95	0.360024	0.229085	0.00552632	0.999829	0.00089419	0.998146	9.29148e-07	MIC not significant	FALSE	TRUE	FALSE	FALSE	FALSE	TRUE	FALSE	FALSE
pcodonTTGGAG	1267	0.101749	0.000284847	0.811	0.784	0.826503	0.809571	54	0.564941	0.279436	0.000171053	0.278934	2.54889e-08	0.315749	3.97585e-05	MIC not significant	FALSE	TRUE	FALSE	FALSE	FALSE	TRUE	FALSE	FALSE
pcodonTTGGGT	1267	0.114402	0.0103541	0.554	0.931	0.563529	0.923583	218	0.314445	0.245457	7.92079e-05	1	1.02022e-07	1	6.65524e-15	MIC not significant	FALSE	TRUE	FALSE	FALSE	FALSE	TRUE	FALSE	FALSE
pcodonTTGGGC	1267	0.126655	0.0114508	0.043	0.32	0.0301902	0.339234	175	0.372508	0.252774	1.9802e-05	1	2.56999e-09	0.999971	1.34105e-12	Monotone	FALSE	TRUE	FALSE	FALSE	FALSE	TRUE	FALSE	FALSE
pcodonTTGGGA	1267	0.144321	0.026295	0.001	0.324	4.88836e-05	0.339149	242	0.345926	0.258648	0	1	1.87654e-13	1	2.52923e-17	Monotone	TRUE	TRUE	FALSE	TRUE	TRUE	TRUE	FALSE	TRUE
pcodonTTGGGG	1267	0.133013	0.0122516	0.008	0.182	0.00679427	0.172399	190	0.331541	0.221376	3.9604e-05	1	1.12618e-07	0.999978	7.39336e-12	Monotone	TRUE	TRUE	FALSE	TRUE	TRUE	TRUE	FALSE	TRUE
pcodonTCTTTT	1267	0.120935	0.00880879	0.175	0.549	0.181479	0.559425	188	0.374155	0.264582	0	1	4.31404e-12	0.999985	4.33321e-14	MIC not significant	FALSE	TRUE	FALSE	FALSE	FALSE	TRUE	FALSE	FALSE
pcodonTCTTTC	1267	0.11761	0.0175218	0.225	0.955	0.229885	0.943589	151	0.386915	0.256108	3.94737e-05	0.999974	1.25571e-08	0.999744	3.38758e-11	MIC not significant	FALSE	TRUE	FALSE	FALSE	FALSE	TRUE	FALSE	FALSE
pcodonTCTTTA	1267	0.128618	0.0098448	0.021	0.193	0.018109	0.195241	172	0.369703	0.313818	0	1	4.48444e-11	1	1.34804e-15	Monotone	FALSE	TRUE	FALSE	FALSE	FALSE	TRUE	FALSE	FALSE
pcodonTCTTTG	1267	0.124183	0.00245365	0.059	0.076	0.0505174	0.077908	144	0.301343	0.227257	0.00793069	1	0.00195245	1	1.54007e-09	MIC not significant	FALSE	TRUE	FALSE	FALSE	FALSE	TRUE	FALSE	FALSE
pcodonTCTTCT	1267	0.127285	0.0146558	0.009	0.224	0.00255675	0.232783	84	0.387846	0.233072	0.012	0.998	0.00250903	0.993246	3.30575e-06	Monotone	TRUE	TRUE	FALSE	TRUE	TRUE	TRUE	FALSE	TRUE
pcodonTCTTCC	1267	0.105571	0.00262914	0.631	0.735	0.644393	0.746986	70	0.411749	0.223153	0.009	0.961	0.0010578	0.934635	3.64536e-05	MIC not significant	FALSE	TRUE	FALSE	FALSE	FALSE	TRUE	FALSE	FALSE
pcodonTCTTCA	1267	0.100994	9.89836e-06	0.887	0.85	0.878586	0.850386	48	0.520236	0.245851	0.00276316	0.533447	0.000114032	0.573	0.000338809	MIC not significant	FALSE	TRUE	FALSE	FALSE	FALSE	TRUE	FALSE	FALSE
pcodonTCTTCG	1267	0.125578	0.00912659	0.015	0.126	0.00834953	0.123057	94	0.414634	0.357768	0.000386139	1	2.51503e-06	1	1.94063e-10	Monotone	FALSE	TRUE	FALSE	FALSE	TRUE	TRUE	FALSE	TRUE
pcodonTCTTAT	1267	0.117772	0.0188509	0.252	0.969	0.259104	0.967315	169	0.301897	0.288282	0.00214851	1	0.000217135	1	5.26726e-14	MIC not significant	FALSE	TRUE	FALSE	FALSE	FALSE	TRUE	FALSE	FALSE
pcodonTCTTAC	1267	0.118221	0.00433364	0.044	0.132	0.0395901	0.121368	47	0.442133	0.237217	0.035	0.958	0.0152921	0.931857	0.000602383	Monotone	FALSE	FALSE	FALSE	FALSE	FALSE	TRUE	FALSE	FALSE
pcodonTCTTAA	1267	0.108931	0.00413807	0.386	0.583	0.404972	0.617756	55	0.406914	0.299887	0.015	0.999	0.00313975	0.998972	2.08707e-05	MIC not significant	FALSE	TRUE	FALSE	FALSE	FALSE	TRUE	FALSE	FALSE
pcodonTCTTAG	1267	0.119387	0.00270194	0.065	0.102	0.0550135	0.0936359	80	0.509686	0.44869	1.9802e-05	1	7.99223e-12	0.999992	1.08776e-11	MIC not significant	FALSE	TRUE	FALSE	FALSE	FALSE	TRUE	FALSE	FALSE
pcodonTCTTGT	1267	0.0994832	0.00230874	0.917	0.958	0.917503	0.948277	74	0.47912	0.445426	0.000207921	1	1.35003e-07	1	8.37334e-11	MIC not significant	FALSE	TRUE	FALSE	FALSE	FALSE	TRUE	FALSE	FALSE
pcodonTCTTGC	1267	0.112858	0.0139165	0.203	0.908	0.197468	0.897844	54	0.460105	0.394659	0.00407895	0.999974	0.000288559	0.999919	3.66573e-07	MIC not significant	FALSE	TRUE	FALSE	FALSE	FALSE	TRUE	FALSE	FALSE
pcodonTCTTGA	1267	0.118721	0.00356894	0.085	0.149	0.0786977	0.153221	87	0.40371	0.321995	0.00237624	1	0.000183606	0.999994	9.98772e-09	MIC not significant	FALSE	TRUE	FALSE	FALSE	FALSE	TRUE	FALSE	FALSE
pcodonTCTTGG	1267	0.123834	0.00820402	0.054	0.283	0.0558773	0.287224	148	0.367799	0.279009	0.000287129	1	1.89026e-06	1	5.22184e-12	MIC not significant	FALSE	TRUE	FALSE	FALSE	FALSE	TRUE	FALSE	FALSE
pcodonTCTCTT	1267	0.107072	0.00294353	0.629	0.745	0.650413	0.753343	102	0.402909	0.23648	0.002	0.999	0.000100841	0.992149	2.19868e-07	MIC not significant	FALSE	TRUE	FALSE	FALSE	FALSE	TRUE	FALSE	FALSE
pcodonTCTCTC	1267	0.110928	0.00920452	0.266	0.813	0.267282	0.826578	42	0.314331	0.207161	0.231	0.999	0.239871	0.993184	0.00270368	MIC not significant	FALSE	FALSE	FALSE	FALSE	FALSE	FALSE	FALSE	FALSE
pcodonTCTCTA	1267	0.0977006	0.000496801	0.961	0.96	0.949674	0.945158	50	0.424232	0.295111	0.032	0.999	0.0121836	0.995991	6.03166e-05	MIC not significant	FALSE	TRUE	FALSE	FALSE	FALSE	TRUE	FALSE	FALSE
pcodonTCTCTG	1267	0.108605	0.000819471	0.462	0.459	0.495325	0.497575	78	0.360963	0.219258	0.012	0.998	0.00378956	0.991686	1.5379e-05	MIC not significant	FALSE	TRUE	FALSE	FALSE	FALSE	TRUE	FALSE	FALSE
pcodonTCTCCT	1267	0.118879	0.00416153	0.149	0.285	0.158764	0.290992	137	0.422298	0.314471	0	1	1.51186e-11	0.999965	1.02867e-12	MIC not significant	FALSE	TRUE	FALSE	FALSE	FALSE	TRUE	FALSE	FALSE
pcodonTCTCCC	1267	0.113921	0.00227084	0.15	0.193	0.131306	0.189037	44	0.39051	0.0690219	0.03	0.067	0.0112616	0.0602134	0.0850478	MIC not significant	FALSE	TRUE	FALSE	FALSE	FALSE	TRUE	FALSE	FALSE
pcodonTCTCCG	1267	0.109551	0.00849449	0.399	0.834	0.406878	0.836395	71	0.465491	0.323641	0.000578947	0.999053	3.48793e-06	0.994895	2.26493e-07	MIC not significant	FALSE	TRUE	FALSE	FALSE	FALSE	TRUE	FALSE	FALSE
pcodonTCTCGT	1267	0.10239	0.00344786	0.817	0.927	0.812657	0.913046	52	0.555363	0.515164	0.000316832	1	3.50425e-07	0.999991	8.23573e-09	MIC not significant	FALSE	TRUE	FALSE	FALSE	FALSE	TRUE	FALSE	FALSE
pcodonTCTATT	1267	0.115036	0.00289336	0.452	0.567	0.452509	0.560864	195	0.451626	0.323223	0	0.99997	2.37391e-27	0.999288	4.33826e-18	MIC not significant	FALSE	TRUE	FALSE	FALSE	FALSE	TRUE	FALSE	FALSE
pcodonTCTATC	1267	0.107279	0.00805512	0.539	0.919	0.560706	0.900722	72	0.322707	0.258292	0.100198	1	0.0934442	0.999993	5.17661e-06	MIC not significant	FALSE	FALSE	FALSE	FALSE	FALSE	FALSE	FALSE	FALSE
pcodonTCTATA	1267	0.1102	0.00316237	0.337	0.491	0.356129	0.502876	68	0.488498	0.288732	0.001	0.931	2.94467e-06	0.915223	2.30586e-06	MIC not significant	FALSE	TRUE	FALSE	FALSE	FALSE	TRUE	FALSE	FALSE
pcodonTCTATG	1267	0.112052	0.0053898	0.517	0.756	0.528939	0.757959	153	0.442623	0.304417	0	0.999911	5.34516e-15	0.999211	1.44906e-13	MIC not significant	FALSE	TRUE	FALSE	FALSE	FALSE	TRUE	FALSE	FALSE
pcodonTCTACT	1267	0.130025	0.00787694	0.004	0.036	0.00226541	0.0321986	108	0.391108	0.283782	0.00115842	1	2.62237e-05	0.999962	2.9482e-09	Monotone	TRUE	TRUE	FALSE	TRUE	TRUE	TRUE	FALSE	TRUE
pcodonTCTACG	1267	0.118357	0.00834038	0.092	0.37	0.0805842	0.379025	75	0.444861	0.376816	0.000633663	1	3.94848e-06	0.999986	4.73258e-09	MIC not significant	FALSE	TRUE	FALSE	FALSE	FALSE	TRUE	FALSE	FALSE
pcodonTCTAAT	1267	0.107716	0.00415931	0.503	0.725	0.51534	0.726819	66	0.368974	0.234675	0.05	0.999	0.0358618	0.998045	3.76397e-05	MIC not significant	FALSE	FALSE	FALSE	FALSE	FALSE	FALSE	FALSE	FALSE
pcodonTCTAAC	1267	0.118657	0.00378889	0.032	0.08	0.0212587	0.0651968	46	0.551725	0.386061	0.002	0.922	1.58697e-07	0.884535	6.68868e-06	non-significant monotone/non-monotone	FALSE	TRUE	FALSE	FALSE	FALSE	TRUE	FALSE	FALSE
pcodonTCTAAG	1267	0.113108	0.00851634	0.401	0.799	0.42547	0.812998	139	0.380715	0.243079	6.57895e-05	0.99975	3.79239e-08	0.998286	7.00874e-10	MIC not significant	FALSE	TRUE	FALSE	FALSE	FALSE	TRUE	FALSE	FALSE
pcodonTCTAGT	1267	0.102253	5.5494e-05	0.813	0.783	0.811225	0.781427	57	0.526563	0.478102	0.000197368	0.999987	1.04636e-07	0.99998	2.60421e-09	MIC not significant	FALSE	TRUE	FALSE	FALSE	FALSE	TRUE	FALSE	FALSE
pcodonTCTAGA	1267	0.104761	0.00113332	0.629	0.661	0.656671	0.678359	58	0.435314	0.408808	0.00369307	1	0.000232468	0.999997	6.58111e-08	MIC not significant	FALSE	TRUE	FALSE	FALSE	FALSE	TRUE	FALSE	FALSE
pcodonTCTAGG	1267	0.116739	0.00798792	0.144	0.487	0.145645	0.495664	89	0.443042	0.393278	0.000287129	1	8.63545e-07	1	4.8573e-11	MIC not significant	FALSE	TRUE	FALSE	FALSE	FALSE	TRUE	FALSE	FALSE
pcodonTCTGTC	1267	0.114362	0.0171223	0.146	0.958	0.134457	0.940418	52	0.455307	0.2712	0.007	0.965	0.000852156	0.944812	7.56279e-05	MIC not significant	FALSE	TRUE	FALSE	FALSE	FALSE	TRUE	FALSE	FALSE
pcodonTCTGTG	1267	0.10869	0.00376919	0.484	0.649	0.49963	0.667614	86	0.506603	0.448024	1.9802e-05	1	6.64069e-10	1	1.85133e-12	MIC not significant	FALSE	TRUE	FALSE	FALSE	FALSE	TRUE	FALSE	FALSE
pcodonTCTGCT	1267	0.125182	0.0121781	0.031	0.271	0.0187593	0.299671	101	0.383944	0.279373	0.000631579	0.999974	7.26443e-06	0.999793	1.33704e-08	Monotone	FALSE	TRUE	FALSE	FALSE	FALSE	TRUE	FALSE	FALSE
pcodonTCTGCC	1267	0.11453	0.00215933	0.137	0.174	0.125643	0.1744	53	0.387309	0.244397	0.039	0.997	0.0209754	0.99029	0.000168253	MIC not significant	FALSE	FALSE	FALSE	FALSE	FALSE	TRUE	FALSE	FALSE
pcodonTCTGCA	1267	0.109416	0.000268789	0.33	0.292	0.35102	0.317635	42	0.431437	0.21989	0.012	0.725	0.00232914	0.744387	0.00193719	MIC not significant	FALSE	TRUE	FALSE	FALSE	FALSE	TRUE	FALSE	FALSE
pcodonTCTGCG	1267	0.127346	0.00826483	0.01	0.092	0.00698831	0.0784838	109	0.413993	0.303322	0.000227723	1	5.91408e-07	0.999936	5.48011e-10	Monotone	TRUE	TRUE	FALSE	TRUE	TRUE	TRUE	FALSE	TRUE
pcodonTCTGAA	1267	0.109357	0.0076519	0.383	0.792	0.40001	0.797485	64	0.477421	0.271048	0.003	0.95	4.63317e-05	0.921036	1.03385e-05	MIC not significant	FALSE	TRUE	FALSE	FALSE	FALSE	TRUE	FALSE	FALSE
pcodonTCTGAG	1267	0.114187	0.00480568	0.122	0.289	0.116836	0.313754	42	0.365484	0.138766	0.054	0.611	0.0457929	0.660248	0.0151213	MIC not significant	FALSE	FALSE	FALSE	FALSE	FALSE	FALSE	FALSE	FALSE
pcodonTCTGGT	1267	0.107531	0.00375109	0.705	0.831	0.71931	0.842055	139	0.37893	0.355227	9.90099e-05	1	6.20589e-08	1	9.91759e-15	MIC not significant	FALSE	TRUE	FALSE	FALSE	FALSE	TRUE	FALSE	FALSE
pcodonTCTGGC	1267	0.102998	0.00408359	0.778	0.897	0.771063	0.896149	68	0.42931	0.31634	0.00472368	0.999947	0.000464483	0.999513	5.98808e-07	MIC not significant	FALSE	TRUE	FALSE	FALSE	FALSE	TRUE	FALSE	FALSE
pcodonTCTGGA	1267	0.105678	0.0066356	0.715	0.926	0.723404	0.920886	101	0.462493	0.283918	0	0.933802	1.65339e-11	0.912812	9.70149e-09	MIC not significant	FALSE	TRUE	FALSE	FALSE	FALSE	TRUE	FALSE	FALSE
pcodonTCTGGG	1267	0.108435	0.0114047	0.661	0.977	0.668746	0.973451	128	0.4217	0.332067	3.9604e-05	1	3.25081e-09	0.999999	1.10121e-12	MIC not significant	FALSE	TRUE	FALSE	FALSE	FALSE	TRUE	FALSE	FALSE
pcodonTCCTTT	1267	0.119425	0.00654008	0.214	0.507	0.230043	0.519536	182	0.330135	0.164172	0.000263158	0.988513	2.22846e-06	0.974946	1.39685e-08	MIC not significant	FALSE	TRUE	FALSE	FALSE	FALSE	TRUE	FALSE	FALSE
pcodonTCCTTC	1267	0.139025	0.0301065	0.001	0.612	3.54694e-05	0.612065	133	0.264538	0.0915362	0.155	0.981	0.15664	0.974202	0.00040079	MIC not significant	TRUE	FALSE	FALSE	FALSE	TRUE	FALSE	FALSE	FALSE
pcodonTCCTTA	1267	0.12278	0.0113396	0.106	0.555	0.096419	0.555357	170	0.277365	0.19133	0.0122475	1	0.00417691	0.999999	2.45648e-09	MIC not significant	FALSE	TRUE	FALSE	FALSE	FALSE	TRUE	FALSE	FALSE
pcodonTCCTTG	1267	0.119935	0.0158515	0.142	0.836	0.129924	0.834119	146	0.490204	0.325859	0	0.978317	1.58849e-23	0.960772	5.36532e-14	MIC not significant	FALSE	TRUE	FALSE	FALSE	FALSE	TRUE	FALSE	FALSE
pcodonTCCTCT	1267	0.126664	0.0124385	0.011	0.205	0.00651062	0.206677	92	0.375757	0.26843	0.00394737	0.999987	0.000440329	0.999848	1.22651e-07	Monotone	TRUE	TRUE	FALSE	TRUE	TRUE	TRUE	FALSE	TRUE
pcodonTCCTCC	1267	0.124301	0.0227398	0.023	0.843	0.0141406	0.844799	91	0.273716	0.0631357	0.281	0.814	0.303595	0.811344	0.0162839	MIC not significant	FALSE	FALSE	FALSE	FALSE	TRUE	FALSE	FALSE	FALSE
pcodonTCCTCA	1267	0.120932	0.0138534	0.042	0.451	0.0234461	0.492323	62	0.336739	0.234795	0.0479737	0.999671	0.0313462	0.99817	6.58515e-05	Monotone	FALSE	FALSE	FALSE	FALSE	FALSE	TRUE	FALSE	FALSE
pcodonTCCTCG	1267	0.134426	0.0265096	0.001	0.586	0.0006519	0.613424	121	0.364961	0.239586	0.000328947	0.999895	4.975e-06	0.999033	1.21692e-08	Monotone	TRUE	TRUE	FALSE	TRUE	TRUE	TRUE	FALSE	TRUE
pcodonTCCTAT	1267	0.12368	0.00555763	0.018	0.071	0.0126501	0.0627916	80	0.377639	0.230081	0.004	0.991	0.000389577	0.981087	6.73472e-06	Monotone	FALSE	TRUE	FALSE	FALSE	TRUE	TRUE	FALSE	TRUE
pcodonTCCTAG	1267	0.116602	0.00768892	0.067	0.355	0.06332	0.357708	51	0.503052	0.367034	0.00182895	0.998355	5.91529e-05	0.993332	2.46859e-06	MIC not significant	FALSE	TRUE	FALSE	FALSE	FALSE	TRUE	FALSE	FALSE
pcodonTCCTGT	1267	0.111272	0.01032	0.298	0.831	0.300152	0.839254	67	0.452801	0.365256	0.00221053	0.999974	0.000112309	0.999949	6.11424e-08	MIC not significant	FALSE	TRUE	FALSE	FALSE	FALSE	TRUE	FALSE	FALSE
pcodonTCCTGC	1267	0.138653	0.0263336	0.000223684	0.325724	2.76701e-05	0.339924	108	0.326968	0.172908	0.0260132	0.99925	0.0135308	0.995327	7.62453e-06	Monotone	TRUE	TRUE	FALSE	TRUE	TRUE	TRUE	FALSE	TRUE
pcodonTCCTGA	1267	0.100383	0.00031993	0.883	0.867	0.872445	0.858212	74	0.426185	0.371287	0.00150495	1	4.01838e-05	0.999997	8.3515e-09	MIC not significant	FALSE	TRUE	FALSE	FALSE	FALSE	TRUE	FALSE	FALSE
pcodonTCCTGG	1267	0.124449	0.030842	0.065	0.999	0.0536306	0.9962	166	0.318597	0.263822	0.000930693	1	3.26587e-05	1	1.47488e-12	MIC not significant	FALSE	TRUE	FALSE	FALSE	FALSE	TRUE	FALSE	FALSE
pcodonTCCCTT	1267	0.136805	0.0277306	0.000223684	0.423816	2.4615e-05	0.442043	86	0.346925	0.234789	0.0332632	0.999974	0.0191172	0.999806	2.27412e-06	Monotone	TRUE	TRUE	FALSE	TRUE	TRUE	TRUE	FALSE	TRUE
pcodonTCCCCT	1267	0.11415	0.0165537	0.214	0.958	0.222173	0.952105	89	0.29717	0.141885	0.138	0.998	0.159726	0.992157	0.000274449	MIC not significant	FALSE	FALSE	FALSE	FALSE	FALSE	FALSE	FALSE	FALSE
pcodonTCCCCG	1267	0.123168	0.0139951	0.009	0.324	0.00380323	0.333131	51	0.575764	0.460475	0.000223684	0.999566	1.05785e-07	0.998075	4.44463e-08	Monotone	TRUE	TRUE	FALSE	TRUE	TRUE	TRUE	FALSE	TRUE
pcodonTCCCGT	1267	0.116537	0.0086013	0.074	0.388	0.0617661	0.425293	41	0.478336	0.258609	0.007	0.682	0.000405091	0.704388	0.000805944	MIC not significant	FALSE	TRUE	FALSE	FALSE	FALSE	TRUE	FALSE	FALSE
pcodonTCCATT	1267	0.1219	0.0283523	0.069	0.996	0.0669181	0.991854	129	0.349282	0.229867	0.00255446	1	0.000215133	0.999921	9.00986e-09	MIC not significant	FALSE	TRUE	FALSE	FALSE	FALSE	TRUE	FALSE	FALSE
pcodonTCCATC	1267	0.129378	0.00291868	0.001	0.003	0.000446465	0.00118813	61	0.542266	0.420668	5.26316e-05	0.998487	2.85179e-10	0.993672	1.58395e-08	Monotone	TRUE	TRUE	FALSE	TRUE	TRUE	TRUE	FALSE	TRUE
pcodonTCCATA	1267	0.107	0.00493646	0.507	0.773	0.532485	0.768153	56	0.253558	0.118302	0.604	0.998	0.644216	0.991818	0.0097651	MIC not significant	FALSE	FALSE	FALSE	FALSE	FALSE	FALSE	FALSE	FALSE
pcodonTCCATG	1267	0.124909	0.0269838	0.032	0.973	0.0323519	0.964958	138	0.302821	0.193728	0.0144554	1	0.00550611	0.99996	6.59595e-08	Monotone	FALSE	TRUE	FALSE	FALSE	FALSE	TRUE	FALSE	FALSE
pcodonTCCACT	1267	0.118241	0.0111377	0.059	0.467	0.0544377	0.494077	70	0.384845	0.143594	0.02	0.593	0.00703194	0.64667	0.00121691	MIC not significant	FALSE	TRUE	FALSE	FALSE	FALSE	TRUE	FALSE	FALSE
pcodonTCCACC	1267	0.120595	0.0139319	0.032	0.507	0.0235733	0.514246	63	0.477161	0.304678	0.004	0.991	9.66966e-05	0.982527	2.73966e-06	Monotone	FALSE	TRUE	FALSE	FALSE	FALSE	TRUE	FALSE	FALSE
pcodonTCCACG	1267	0.129195	0.0328627	0.009	0.975	0.00456073	0.966078	103	0.36768	0.163167	0.007	0.914	0.00133095	0.898755	2.32368e-05	non-significant monotone/non-monotone	TRUE	TRUE	FALSE	FALSE	TRUE	TRUE	FALSE	FALSE
pcodonTCCAAG	1267	0.131118	0.0213462	0.005	0.478	0.00214588	0.505301	118	0.418244	0.247939	3.94737e-05	0.977605	2.55839e-09	0.959293	9.63265e-09	Monotone	TRUE	TRUE	FALSE	TRUE	TRUE	TRUE	FALSE	FALSE
pcodonTCCAGT	1267	0.113499	0.0065568	0.157	0.47	0.155247	0.497144	42	0.550872	0.411685	0.0005	0.988974	1.2234e-06	0.970138	4.67054e-06	MIC not significant	FALSE	TRUE	FALSE	FALSE	FALSE	TRUE	FALSE	FALSE
pcodonTCCAGC	1267	0.118102	0.0197373	0.064	0.934	0.0549403	0.921679	62	0.286581	0.0771706	0.234	0.697	0.246361	0.708768	0.0288099	MIC not significant	FALSE	FALSE	FALSE	FALSE	FALSE	FALSE	FALSE	FALSE
pcodonTCCAGG	1267	0.122774	0.0202491	0.049	0.844	0.0390113	0.840027	110	0.352926	0.200173	0.004	0.998	0.00088492	0.995086	9.56592e-07	Monotone	FALSE	TRUE	FALSE	FALSE	FALSE	TRUE	FALSE	FALSE
pcodonTCCGTC	1267	0.110412	0.00689679	0.332	0.713	0.340672	0.727848	55	0.277784	0.0988698	0.432	0.97	0.484373	0.948569	0.0193873	MIC not significant	FALSE	FALSE	FALSE	FALSE	FALSE	FALSE	FALSE	FALSE
pcodonTCCGTG	1267	0.108933	0.00762104	0.413	0.818	0.428847	0.818978	56	0.438411	0.343061	0.002	0.999	0.000401405	0.999537	3.37879e-06	MIC not significant	FALSE	TRUE	FALSE	FALSE	FALSE	TRUE	FALSE	FALSE
pcodonTCCGCT	1267	0.113717	0.00574037	0.188	0.43	0.189726	0.446384	69	0.414526	0.285788	0.00667105	0.99975	0.000967521	0.998311	2.22806e-06	MIC not significant	FALSE	TRUE	FALSE	FALSE	FALSE	TRUE	FALSE	FALSE
pcodonTCCGCC	1267	0.121382	0.00807234	0.022	0.129	0.00951376	0.128226	55	0.350449	0.27201	0.0822632	0.999961	0.0706186	0.999786	4.44308e-05	MIC not significant	FALSE	FALSE	FALSE	FALSE	TRUE	FALSE	FALSE	FALSE
pcodonTCCGCG	1267	0.130104	0.0186957	0.007	0.361	0.00231222	0.37995	106	0.354585	0.277437	0.0079703	1	0.00191338	0.999999	6.64114e-09	Monotone	TRUE	TRUE	FALSE	TRUE	TRUE	TRUE	FALSE	TRUE
pcodonTCCGGT	1267	0.1247	0.0138889	0.02	0.369	0.0161642	0.388595	92	0.380661	0.277083	0.00342105	0.999987	0.00027329	0.999898	7.07517e-08	Monotone	FALSE	TRUE	FALSE	FALSE	FALSE	TRUE	FALSE	FALSE
pcodonTCCGGC	1267	0.112359	0.0123956	0.22	0.879	0.229869	0.88105	68	0.351791	0.304573	0.0676139	1	0.0541471	0.999999	1.0701e-06	MIC not significant	FALSE	FALSE	FALSE	FALSE	FALSE	FALSE	FALSE	FALSE
pcodonTCCGGA	1267	0.122447	0.0111582	0.032	0.312	0.0250492	0.321538	87	0.298301	0.13968	0.177	0.995	0.203925	0.989378	0.000362869	MIC not significant	FALSE	FALSE	FALSE	FALSE	FALSE	FALSE	FALSE	FALSE
pcodonTCCGGG	1267	0.119309	0.0120745	0.065	0.51	0.0503884	0.52287	77	0.330267	0.121975	0.043	0.773	0.0335615	0.776449	0.00185079	MIC not significant	FALSE	FALSE	FALSE	FALSE	FALSE	TRUE	FALSE	FALSE
pcodonTCATTT	1267	0.125029	0.00299732	0.016	0.037	0.0132349	0.0280602	94	0.472669	0.385367	0	1	3.25579e-10	0.999981	2.48412e-11	Monotone	FALSE	TRUE	FALSE	FALSE	TRUE	TRUE	FALSE	TRUE
pcodonTCATTC	1267	0.0999298	0.000215307	0.899	0.883	0.89311	0.880069	53	0.472471	0.346942	0.005	0.998	0.000278309	0.995915	5.46574e-06	MIC not significant	FALSE	TRUE	FALSE	FALSE	FALSE	TRUE	FALSE	FALSE
pcodonTCATTA	1267	0.108994	0.00387744	0.435	0.616	0.455905	0.640421	74	0.37422	0.330428	0.0130495	1	0.00364495	0.999999	8.50643e-08	MIC not significant	FALSE	TRUE	FALSE	FALSE	FALSE	TRUE	FALSE	FALSE
pcodonTCATTG	1267	0.108968	0.00237144	0.489	0.565	0.50175	0.591079	92	0.408426	0.324873	0.0010198	1	1.73509e-05	0.999989	3.02535e-09	MIC not significant	FALSE	TRUE	FALSE	FALSE	FALSE	TRUE	FALSE	FALSE
pcodonTCATGG	1267	0.102774	0.00794865	0.767	0.993	0.78223	0.975406	50	0.637489	0.522904	2.63158e-05	0.999632	6.08973e-10	0.998408	1.66169e-08	MIC not significant	FALSE	TRUE	FALSE	FALSE	FALSE	TRUE	FALSE	FALSE
pcodonTCACTT	1267	0.0988569	0.00032651	0.935	0.93	0.924931	0.918704	65	0.480044	0.342762	0.00143421	0.999632	3.12455e-05	0.997717	3.01518e-07	MIC not significant	FALSE	TRUE	FALSE	FALSE	FALSE	TRUE	FALSE	FALSE
pcodonTCACCT	1267	0.108246	0.001208	0.43	0.462	0.439077	0.472124	41	0.342057	0.275534	0.137092	0.999829	0.141741	0.999286	0.000513322	MIC not significant	FALSE	FALSE	FALSE	FALSE	FALSE	FALSE	FALSE	FALSE
pcodonTCACCG	1267	0.115605	0.00650499	0.104	0.33	0.091458	0.360558	41	0.49847	0.389646	0.007	0.999	0.000484892	0.991622	1.99515e-05	MIC not significant	FALSE	TRUE	FALSE	FALSE	FALSE	TRUE	FALSE	FALSE
pcodonTCACGT	1267	0.113417	0.000309413	0.144	0.13	0.135438	0.113912	44	0.367276	0.360846	0.0498713	1	0.0320348	0.999989	2.39728e-05	MIC not significant	FALSE	FALSE	FALSE	FALSE	FALSE	TRUE	FALSE	FALSE
pcodonTCAATT	1267	0.118134	0.010063	0.087	0.462	0.0762047	0.480951	81	0.439931	0.273495	0.000144737	0.972539	2.32875e-07	0.950644	8.24339e-07	MIC not significant	FALSE	TRUE	FALSE	FALSE	FALSE	TRUE	FALSE	FALSE
pcodonTCAATA	1267	0.122511	0.00118753	0.009	0.01	0.00507733	0.00547409	47	0.374902	0.193458	0.135	0.988	0.139601	0.960374	0.00197786	MIC not significant	TRUE	FALSE	FALSE	FALSE	TRUE	FALSE	FALSE	FALSE
pcodonTCAATG	1267	0.110864	0.00354947	0.336	0.512	0.350697	0.51133	77	0.341684	0.226999	0.0297368	0.999816	0.0149638	0.998916	1.51748e-05	MIC not significant	FALSE	TRUE	FALSE	FALSE	FALSE	TRUE	FALSE	FALSE
pcodonTCAACT	1267	0.101198	0.000674882	0.866	0.871	0.862628	0.864561	40	0.403221	0.203768	0.04	0.852	0.0240845	0.833866	0.00377061	MIC not significant	FALSE	FALSE	FALSE	FALSE	FALSE	TRUE	FALSE	FALSE
pcodonTCAAAG	1267	0.1057	0.00765414	0.587	0.943	0.615768	0.928376	49	0.528259	0.279604	0.00167105	0.702434	3.87942e-05	0.718659	0.000119116	MIC not significant	FALSE	TRUE	FALSE	FALSE	FALSE	TRUE	FALSE	FALSE
pcodonTCAAGG	1267	0.108915	0.00270959	0.365	0.476	0.387016	0.517423	43	0.475672	0.243996	0.006	0.555	0.000173673	0.583556	0.000882527	MIC not significant	FALSE	TRUE	FALSE	FALSE	FALSE	TRUE	FALSE	FALSE
pcodonTCAGCG	1267	0.109789	0.0100341	0.328	0.923	0.353754	0.907119	42	0.613681	0.285604	0.000105263	0.0877237	3.17891e-09	0.0786185	0.00026678	MIC not significant	FALSE	TRUE	FALSE	FALSE	FALSE	TRUE	FALSE	FALSE
pcodonTCAGGT	1267	0.114786	0.00675223	0.121	0.382	0.128196	0.413978	53	0.360898	0.229155	0.089	0.999	0.0806234	0.994129	0.000287977	MIC not significant	FALSE	FALSE	FALSE	FALSE	FALSE	FALSE	FALSE	FALSE
pcodonTCAGGA	1267	0.0970874	3.7335e-05	0.98	0.969	0.95739	0.945962	50	0.33581	0.21736	0.221342	0.999513	0.248093	0.997929	0.000735936	MIC not significant	FALSE	FALSE	FALSE	FALSE	FALSE	FALSE	FALSE	FALSE
pcodonTCAGGG	1267	0.0981221	0.000176314	0.951	0.941	0.93481	0.923967	65	0.456148	0.24249	0.002	0.903	0.000205509	0.881731	3.09071e-05	MIC not significant	FALSE	TRUE	FALSE	FALSE	FALSE	TRUE	FALSE	FALSE
pcodonTCGTTT	1267	0.115867	0.014362	0.357	0.948	0.361967	0.942146	177	0.335617	0.247185	0.00029703	1	3.7011e-06	1	1.93348e-12	MIC not significant	FALSE	TRUE	FALSE	FALSE	FALSE	TRUE	FALSE	FALSE
pcodonTCGTTC	1267	0.113386	0.012143	0.307	0.874	0.320133	0.876476	101	0.37506	0.169474	0.00106579	0.684066	2.07748e-05	0.703689	1.89433e-05	MIC not significant	FALSE	TRUE	FALSE	FALSE	FALSE	TRUE	FALSE	FALSE
pcodonTCGTTA	1267	0.125276	0.00869767	0.045	0.236	0.0407713	0.236995	145	0.418038	0.396049	0	1	3.10385e-13	1	2.30053e-17	Monotone	FALSE	TRUE	FALSE	FALSE	FALSE	TRUE	FALSE	FALSE
pcodonTCGTTG	1267	0.123036	0.00884925	0.075	0.343	0.0709938	0.358112	149	0.476647	0.300208	0	0.986921	3.60095e-18	0.971839	4.75903e-13	MIC not significant	FALSE	TRUE	FALSE	FALSE	FALSE	TRUE	FALSE	FALSE
pcodonTCGTCT	1267	0.119205	0.00813977	0.113	0.415	0.112069	0.428837	114	0.458663	0.331522	1.31579e-05	0.999895	9.20234e-12	0.999328	2.05887e-11	MIC not significant	FALSE	TRUE	FALSE	FALSE	FALSE	TRUE	FALSE	FALSE
pcodonTCGTCC	1267	0.129326	0.0135715	0.006	0.11	0.000928574	0.109564	72	0.358472	0.292238	0.0296436	1	0.0160145	0.999991	9.49424e-07	Monotone	TRUE	TRUE	FALSE	TRUE	TRUE	TRUE	FALSE	TRUE
pcodonTCGTCA	1267	0.115219	0.0125272	0.1	0.726	0.0895939	0.752505	45	0.261115	0.197141	0.421434	0.999776	0.474142	0.999326	0.0024661	MIC not significant	FALSE	FALSE	FALSE	FALSE	FALSE	FALSE	FALSE	FALSE
pcodonTCGTCG	1267	0.127988	0.0251301	0.02	0.902	0.013386	0.882904	139	0.384864	0.288345	1.9802e-05	1	1.29842e-08	0.999995	9.45967e-12	Monotone	FALSE	TRUE	FALSE	FALSE	TRUE	TRUE	FALSE	TRUE
pcodonTCGTAT	1267	0.125397	0.00437275	0.022	0.051	0.011859	0.0384645	93	0.43428	0.343467	0.000158416	1	3.14094e-07	0.999973	6.76e-10	Monotone	FALSE	TRUE	FALSE	FALSE	TRUE	TRUE	FALSE	TRUE
pcodonTCGTAG	1267	0.110589	0.00625395	0.284	0.617	0.30153	0.637938	59	0.581473	0.403013	2.63158e-05	0.942171	1.45828e-11	0.916167	1.52493e-07	MIC not significant	FALSE	TRUE	FALSE	FALSE	FALSE	TRUE	FALSE	FALSE
pcodonTCGTGT	1267	0.107915	0.00648323	0.518	0.844	0.544834	0.840714	75	0.400529	0.335898	0.00389474	0.999987	0.000328226	0.999992	5.08695e-08	MIC not significant	FALSE	TRUE	FALSE	FALSE	FALSE	TRUE	FALSE	FALSE
pcodonTCGTGC	1267	0.119021	0.00943087	0.094	0.433	0.0991095	0.459032	95	0.337516	0.153568	0.015	0.945	0.00610568	0.924842	8.59159e-05	MIC not significant	FALSE	TRUE	FALSE	FALSE	FALSE	TRUE	FALSE	FALSE
pcodonTCGTGA	1267	0.119471	0.0126195	0.061	0.525	0.0565594	0.547178	82	0.403061	0.392678	0.00705941	1	0.00124276	1	3.02651e-10	MIC not significant	FALSE	TRUE	FALSE	FALSE	FALSE	TRUE	FALSE	FALSE
pcodonTCGTGG	1267	0.133517	0.0280187	0.005	0.791	0.00146861	0.799436	149	0.366895	0.23723	0.000148515	0.99999	1.18695e-06	0.999805	2.99893e-10	Monotone	TRUE	TRUE	FALSE	TRUE	TRUE	TRUE	FALSE	TRUE
pcodonTCGCTT	1267	0.125681	0.0232175	0.056	0.913	0.0477623	0.907783	171	0.321598	0.219983	0.000277228	1	3.31462e-06	0.999988	9.78076e-11	MIC not significant	FALSE	TRUE	FALSE	FALSE	FALSE	TRUE	FALSE	FALSE
pcodonTCGCTC	1267	0.120541	0.0106248	0.022	0.278	0.012176	0.288049	45	0.4646	0.235973	0.001	0.511	8.84864e-05	0.559963	0.000828395	non-significant monotone/non-monotone	FALSE	TRUE	FALSE	FALSE	TRUE	TRUE	FALSE	FALSE
pcodonTCGCTA	1267	0.109881	0.000692253	0.385	0.371	0.388061	0.376259	66	0.485719	0.311278	0.002	0.992	2.09343e-05	0.976469	1.13361e-06	MIC not significant	FALSE	TRUE	FALSE	FALSE	FALSE	TRUE	FALSE	FALSE
pcodonTCGCTG	1267	0.115858	0.00535782	0.107	0.275	0.0986332	0.281469	67	0.442012	0.311303	0.00338158	0.999789	0.00027087	0.998497	1.46749e-06	MIC not significant	FALSE	TRUE	FALSE	FALSE	FALSE	TRUE	FALSE	FALSE
pcodonTCGCCT	1267	0.14819	0.0364411	9.90099e-06	0.485525	4.73158e-07	0.503202	154	0.339775	0.152612	0.000960526	0.930763	3.08354e-05	0.913519	5.47383e-07	non-significant monotone/non-monotone	TRUE	TRUE	FALSE	FALSE	TRUE	TRUE	FALSE	FALSE
pcodonTCGCCA	1267	0.114204	0.00761312	0.145	0.495	0.135752	0.523872	48	0.407451	0.152779	0.053	0.681	0.0367213	0.702553	0.00601689	MIC not significant	FALSE	FALSE	FALSE	FALSE	FALSE	FALSE	FALSE	FALSE
pcodonTCGCCG	1267	0.128974	0.0273271	0.008	0.852	0.00288561	0.843837	99	0.340349	0.204041	0.00780263	0.999329	0.00164425	0.995601	2.69191e-06	Monotone	TRUE	TRUE	FALSE	TRUE	TRUE	TRUE	FALSE	TRUE
pcodonTCGCGT	1267	0.119715	0.0078416	0.033	0.222	0.0302302	0.22419	67	0.493644	0.266713	0.000434211	0.788842	2.07497e-06	0.791528	7.68908e-06	non-significant monotone/non-monotone	FALSE	TRUE	FALSE	FALSE	FALSE	TRUE	FALSE	FALSE
pcodonTCGCGA	1267	0.102428	0.00310172	0.786	0.892	0.791758	0.886715	54	0.48859	0.414981	0.00165789	0.999934	3.16212e-05	0.999855	1.47421e-07	MIC not significant	FALSE	TRUE	FALSE	FALSE	FALSE	TRUE	FALSE	FALSE
pcodonTCGCGG	1267	0.110678	0.00313433	0.313	0.454	0.338327	0.479299	64	0.49636	0.353107	0.002	0.999	1.89726e-05	0.997216	2.26032e-07	MIC not significant	FALSE	TRUE	FALSE	FALSE	FALSE	TRUE	FALSE	FALSE
pcodonTCGATT	1267	0.15496	0.0392625	0	0.457386	6.88433e-08	0.473698	246	0.303836	0.198148	4.9505e-05	1	4.65082e-08	0.999996	2.2485e-13	Monotone	TRUE	TRUE	FALSE	TRUE	TRUE	TRUE	FALSE	TRUE
pcodonTCGATC	1267	0.114911	0.0121696	0.202	0.81	0.213746	0.811482	97	0.471847	0.230208	1.31579e-05	0.352868	6.00577e-11	0.38843	6.60267e-07	MIC not significant	FALSE	TRUE	FALSE	FALSE	FALSE	TRUE	FALSE	FALSE
pcodonTCGATA	1267	0.110478	0.0113549	0.445	0.928	0.45941	0.922034	96	0.441587	0.338262	7.92079e-05	0.99999	2.3181e-08	0.999869	5.16871e-10	MIC not significant	FALSE	TRUE	FALSE	FALSE	FALSE	TRUE	FALSE	FALSE
pcodonTCGATG	1267	0.122826	0.0126621	0.122	0.693	0.124444	0.685059	197	0.397849	0.299548	0	1	6.98117e-18	0.999997	8.65935e-17	MIC not significant	FALSE	TRUE	FALSE	FALSE	FALSE	TRUE	FALSE	FALSE
pcodonTCGACT	1267	0.109489	0.00668591	0.591	0.862	0.606982	0.861965	126	0.430445	0.340031	9.90099e-06	1	1.83184e-09	0.999999	7.80879e-13	MIC not significant	FALSE	TRUE	FALSE	FALSE	FALSE	TRUE	FALSE	FALSE
pcodonTCGACC	1267	0.122182	0.0118961	0.069	0.461	0.059589	0.485227	117	0.345358	0.249606	0.00308911	1	0.000281228	0.999984	9.78662e-09	MIC not significant	FALSE	TRUE	FALSE	FALSE	FALSE	TRUE	FALSE	FALSE
pcodonTCGACA	1267	0.110776	0.00415289	0.266	0.461	0.277492	0.497173	49	0.447346	0.362453	0.0178713	0.99995	0.0053747	0.999765	7.46528e-06	MIC not significant	FALSE	TRUE	FALSE	FALSE	FALSE	TRUE	FALSE	FALSE
pcodonTCGACG	1267	0.144285	0.0249176	0.000210526	0.177526	1.41655e-05	0.180844	175	0.442467	0.354977	0	1	3.02665e-18	1	3.3968e-18	Monotone	TRUE	TRUE	FALSE	TRUE	TRUE	TRUE	FALSE	TRUE
pcodonTCGAAT	1267	0.109741	0.0002219	0.356	0.332	0.37591	0.342713	65	0.417455	0.210874	0.012	0.923	0.00372682	0.907958	0.000119242	MIC not significant	FALSE	TRUE	FALSE	FALSE	FALSE	TRUE	FALSE	FALSE
pcodonTCGAAC	1267	0.120979	0.00293304	0.029	0.045	0.0148417	0.0326779	54	0.470726	0.325045	0.001	0.998	7.95399e-05	0.985499	6.78646e-06	Monotone	FALSE	TRUE	FALSE	FALSE	FALSE	TRUE	FALSE	FALSE
pcodonTCGAAA	1267	0.105615	0.00734126	0.597	0.945	0.626151	0.929781	45	0.359575	0.247913	0.057	0.999	0.0416156	0.989253	0.000500825	MIC not significant	FALSE	FALSE	FALSE	FALSE	FALSE	FALSE	FALSE	FALSE
pcodonTCGAAG	1267	0.157894	0.0410195	0	0.38095	6.79303e-09	0.394596	235	0.316001	0.183449	6.57895e-05	0.999987	4.06467e-08	0.999584	6.67164e-12	Monotone	TRUE	TRUE	FALSE	TRUE	TRUE	TRUE	FALSE	TRUE
pcodonTCGAGT	1267	0.112722	0.00943893	0.277	0.784	0.308451	0.767325	92	0.447401	0.293502	6.57895e-05	0.997671	8.65446e-08	0.990764	2.44952e-08	MIC not significant	FALSE	TRUE	FALSE	FALSE	FALSE	TRUE	FALSE	FALSE
pcodonTCGAGC	1267	0.129311	0.0291504	0.002	0.891	0.00217363	0.887504	95	0.261343	0.170951	0.302099	1	0.335837	0.999972	3.12012e-05	MIC not significant	TRUE	FALSE	FALSE	FALSE	TRUE	FALSE	FALSE	FALSE
pcodonTCGAGA	1267	0.105846	0.00673319	0.663	0.923	0.672277	0.908173	87	0.406429	0.348857	0.00263366	1	0.000149412	1	1.72586e-09	MIC not significant	FALSE	TRUE	FALSE	FALSE	FALSE	TRUE	FALSE	FALSE
pcodonTCGAGG	1267	0.154163	0.0202799	0	0.00514851	2.6914e-08	0.0024636	186	0.367021	0.211586	0	0.996782	7.84826e-11	0.98895	3.97475e-11	Monotone	TRUE	TRUE	FALSE	TRUE	TRUE	TRUE	FALSE	TRUE
pcodonTCGGTC	1267	0.11954	0.0120629	0.066	0.515	0.0574172	0.533311	83	0.436785	0.179678	0.004	0.507	8.69111e-05	0.554264	6.51872e-05	MIC not significant	FALSE	TRUE	FALSE	FALSE	FALSE	TRUE	FALSE	FALSE
pcodonTCGGTG	1267	0.125601	0.0166929	0.025	0.532	0.0178976	0.54911	109	0.381859	0.327847	0.00116832	1	3.76409e-05	1	7.7648e-11	Monotone	FALSE	TRUE	FALSE	FALSE	FALSE	TRUE	FALSE	FALSE
pcodonTCGGCT	1267	0.128512	0.0166318	0.008	0.4	0.0083576	0.416759	118	0.406738	0.308566	7.89474e-05	0.999987	1.85048e-08	0.999973	6.63359e-11	Monotone	TRUE	TRUE	FALSE	TRUE	TRUE	TRUE	FALSE	TRUE
pcodonTCGGCC	1267	0.131143	0.0224782	0.005	0.537	0.00160821	0.56586	119	0.347322	0.183797	0.003	0.989	0.000192993	0.972613	1.14818e-06	Monotone	TRUE	TRUE	FALSE	TRUE	TRUE	TRUE	FALSE	TRUE
pcodonTCGGCA	1267	0.113284	0.00517081	0.202	0.413	0.201142	0.443914	62	0.433411	0.369652	0.00159211	0.999974	3.20951e-05	0.999902	1.59705e-07	MIC not significant	FALSE	TRUE	FALSE	FALSE	FALSE	TRUE	FALSE	FALSE
pcodonTCGGCG	1267	0.144043	0.0331981	0.000105263	0.561895	1.37929e-05	0.579192	166	0.337472	0.246283	0.000168317	1	1.20779e-06	0.999999	1.05087e-11	Monotone	TRUE	TRUE	FALSE	TRUE	TRUE	TRUE	FALSE	TRUE
pcodonTCGGAA	1267	0.112529	0.0120568	0.204	0.855	0.215478	0.848812	55	0.456057	0.293804	0.005	0.992	0.000200303	0.966157	1.91837e-05	MIC not significant	FALSE	TRUE	FALSE	FALSE	FALSE	TRUE	FALSE	FALSE
pcodonTCGGAG	1267	0.108498	0.00115501	0.387	0.415	0.412672	0.440879	40	0.474589	0.500524	0.0080495	1	0.000848212	0.999999	3.31892e-07	MIC not significant	FALSE	TRUE	FALSE	FALSE	FALSE	TRUE	FALSE	FALSE
pcodonTCGGGT	1267	0.148039	0.0268056	7.89474e-05	0.170316	4.18213e-06	0.172303	216	0.292707	0.209801	0.000693069	1	2.1209e-05	1	1.33612e-12	Monotone	TRUE	TRUE	FALSE	TRUE	TRUE	TRUE	FALSE	TRUE
pcodonTCGGGC	1267	0.137847	0.0341287	0.000684211	0.857276	0.000198285	0.855574	144	0.322909	0.136912	0.004	0.861	0.000107896	0.851431	5.00504e-06	non-significant monotone/non-monotone	TRUE	TRUE	FALSE	FALSE	TRUE	TRUE	FALSE	FALSE
pcodonTCGGGA	1267	0.146964	0.033847	0.001	0.642	2.07433e-05	0.656157	270	0.307945	0.214353	9.90099e-06	1	7.83827e-10	1	9.47692e-16	Monotone	TRUE	TRUE	FALSE	TRUE	TRUE	TRUE	FALSE	TRUE
pcodonTCGGGG	1267	0.119494	0.0116044	0.141	0.677	0.141141	0.68004	147	0.407721	0.254725	0	0.99502	1.32677e-12	0.984538	7.11507e-11	MIC not significant	FALSE	TRUE	FALSE	FALSE	FALSE	TRUE	FALSE	FALSE
pcodonTATTTT	1267	0.117209	0.00508919	0.422	0.664	0.444833	0.670706	248	0.366911	0.254142	0	1	1.47495e-18	0.999977	2.16357e-17	MIC not significant	FALSE	TRUE	FALSE	FALSE	FALSE	TRUE	FALSE	FALSE
pcodonTATTTC	1267	0.117401	0.00343793	0.339	0.471	0.351502	0.490368	201	0.393258	0.272956	0	1	8.35613e-15	0.999971	1.79325e-15	MIC not significant	FALSE	TRUE	FALSE	FALSE	FALSE	TRUE	FALSE	FALSE
pcodonTATTTA	1267	0.128279	0.00756696	0.074	0.261	0.0632671	0.263559	266	0.331527	0.223133	9.90099e-06	1	7.32315e-13	0.999997	3.44084e-16	MIC not significant	FALSE	TRUE	FALSE	FALSE	FALSE	TRUE	FALSE	FALSE
pcodonTATTTG	1267	0.113885	0.0171043	0.518	0.991	0.528151	0.988849	203	0.403889	0.240429	0	0.992634	8.51821e-17	0.981573	1.12181e-13	MIC not significant	FALSE	TRUE	FALSE	FALSE	FALSE	TRUE	FALSE	FALSE
pcodonTATTCT	1267	0.141736	0.0145914	9.21053e-05	0.0152105	1.03787e-05	0.00962078	126	0.419685	0.35184	3.9604e-05	1	1.28512e-08	1	2.50807e-13	Monotone	TRUE	TRUE	FALSE	TRUE	TRUE	TRUE	FALSE	TRUE
pcodonTATTCC	1267	0.1196	0.0165753	0.065	0.779	0.0600064	0.781026	86	0.383027	0.210658	0.009	0.995	0.00186103	0.983994	1.1134e-05	MIC not significant	FALSE	TRUE	FALSE	FALSE	FALSE	TRUE	FALSE	FALSE
pcodonTATTCG	1267	0.134694	0.0213736	0.002	0.376	0.000631567	0.376724	137	0.310688	0.136063	0.006	0.969	0.00247906	0.952076	9.1924e-06	Monotone	TRUE	TRUE	FALSE	TRUE	TRUE	TRUE	FALSE	FALSE
pcodonTATTAT	1267	0.129538	0.00454805	0.051	0.121	0.0443848	0.112954	264	0.392096	0.305227	0	1	1.9918e-24	1	1.68974e-22	MIC not significant	FALSE	TRUE	FALSE	FALSE	FALSE	TRUE	FALSE	FALSE
pcodonTATTAC	1267	0.106607	0.00298028	0.54	0.698	0.5694	0.695946	66	0.529386	0.435004	0.000184211	0.999987	1.0921e-07	0.999901	1.71865e-09	MIC not significant	FALSE	TRUE	FALSE	FALSE	FALSE	TRUE	FALSE	FALSE
pcodonTATTAA	1267	0.112948	0.00232501	0.262	0.332	0.275804	0.354692	87	0.407857	0.270647	0.00215789	0.99975	0.000115964	0.998356	2.41015e-07	MIC not significant	FALSE	TRUE	FALSE	FALSE	FALSE	TRUE	FALSE	FALSE
pcodonTATTAG	1267	0.0942528	0.00442433	0.994	0.998	0.988499	0.997836	93	0.440276	0.323317	9.21053e-05	0.999961	9.63286e-08	0.999564	2.75206e-09	MIC not significant	FALSE	TRUE	FALSE	FALSE	FALSE	TRUE	FALSE	FALSE
pcodonTATTGT	1267	0.114419	0.000855197	0.27	0.268	0.2772	0.281435	110	0.471002	0.369794	2.9703e-05	1	1.29348e-11	0.999979	1.84422e-12	MIC not significant	FALSE	TRUE	FALSE	FALSE	FALSE	TRUE	FALSE	FALSE
pcodonTATTGC	1267	0.114383	0.0133665	0.298	0.916	0.318918	0.904966	122	0.316628	0.242714	0.00808911	1	0.00164429	0.999999	8.20388e-09	MIC not significant	FALSE	TRUE	FALSE	FALSE	FALSE	TRUE	FALSE	FALSE
pcodonTATTGA	1267	0.141797	0.0239645	0.000118421	0.155211	1.12913e-05	0.156925	129	0.34319	0.255044	0.00353465	1	0.000453557	0.999999	1.03952e-09	Monotone	TRUE	TRUE	FALSE	TRUE	TRUE	TRUE	FALSE	TRUE
pcodonTATTGG	1267	0.148836	0.0309763	2.63158e-05	0.343237	3.98511e-06	0.357439	245	0.366025	0.234802	0	0.99998	1.34341e-17	0.999343	7.87514e-16	Monotone	TRUE	TRUE	FALSE	TRUE	TRUE	TRUE	FALSE	TRUE
pcodonTATCTT	1267	0.134187	0.0176692	0.006	0.324	0.00378691	0.347939	194	0.333428	0.265014	2.9703e-05	1	2.3927e-08	1	1.60289e-14	Monotone	TRUE	TRUE	FALSE	TRUE	TRUE	TRUE	FALSE	TRUE
pcodonTATCTC	1267	0.110508	0.00154994	0.291	0.329	0.307102	0.351651	49	0.439133	0.283842	0.018	0.998	0.00554385	0.990833	8.12149e-05	MIC not significant	FALSE	TRUE	FALSE	FALSE	FALSE	TRUE	FALSE	FALSE
pcodonTATCTA	1267	0.119228	0.00751882	0.053	0.258	0.0511261	0.260726	74	0.464111	0.375723	0.000197368	0.999974	8.31173e-07	0.999914	6.43635e-09	MIC not significant	FALSE	TRUE	FALSE	FALSE	FALSE	TRUE	FALSE	FALSE
pcodonTATCTG	1267	0.131697	0.0144546	0.001	0.081	0.000315017	0.0773062	73	0.299615	0.259475	0.180218	1	0.193227	1	4.17621e-06	MIC not significant	TRUE	FALSE	FALSE	FALSE	TRUE	FALSE	FALSE	FALSE
pcodonTATCCT	1267	0.131128	0.0272078	0.002	0.815	0.00211856	0.806391	127	0.296546	0.170584	0.0589605	0.999987	0.0470536	0.999835	1.39519e-06	MIC not significant	TRUE	FALSE	FALSE	FALSE	TRUE	FALSE	FALSE	FALSE
pcodonTATCCG	1267	0.12173	0.0166277	0.047	0.677	0.0362688	0.688093	91	0.332208	0.201832	0.0336447	0.999842	0.0196061	0.9987	7.93484e-06	Monotone	FALSE	TRUE	FALSE	FALSE	FALSE	TRUE	FALSE	FALSE
pcodonTATCAG	1267	0.111613	0.00510624	0.268	0.512	0.283494	0.535331	59	0.350518	0.284214	0.0463816	0.999974	0.030734	0.999903	1.37933e-05	MIC not significant	FALSE	FALSE	FALSE	FALSE	FALSE	TRUE	FALSE	FALSE
pcodonTATCGT	1267	0.106832	0.00767802	0.595	0.913	0.622799	0.91082	93	0.426649	0.350271	0.000247525	1	7.95437e-07	0.999996	4.16935e-10	MIC not significant	FALSE	TRUE	FALSE	FALSE	FALSE	TRUE	FALSE	FALSE
pcodonTATCGA	1267	0.115156	0.00731073	0.143	0.46	0.13733	0.462459	67	0.441074	0.182195	0.003	0.502	0.000198645	0.546022	0.000315676	MIC not significant	FALSE	TRUE	FALSE	FALSE	FALSE	TRUE	FALSE	FALSE
pcodonTATCGG	1267	0.0990151	0.00093635	0.923	0.932	0.91403	0.919929	50	0.326805	0.194568	0.252	0.998	0.272215	0.994634	0.0013445	MIC not significant	FALSE	FALSE	FALSE	FALSE	FALSE	FALSE	FALSE	FALSE
pcodonTATATT	1267	0.133068	0.0143769	0.031	0.375	0.0228659	0.396407	309	0.361262	0.252984	0	1	2.61585e-25	0.999993	3.22551e-21	Monotone	FALSE	TRUE	FALSE	FALSE	FALSE	TRUE	FALSE	FALSE
pcodonTATATC	1267	0.11558	0.0134044	0.341	0.906	0.35908	0.906432	159	0.304707	0.169052	0.00634211	0.999947	0.00119837	0.99919	7.29939e-08	MIC not significant	FALSE	TRUE	FALSE	FALSE	FALSE	TRUE	FALSE	FALSE
pcodonTATATA	1267	0.136858	0.0123205	0.001	0.041	0.000231774	0.0287586	135	0.317352	0.207611	0.00836634	1	0.00215266	0.999967	2.80846e-08	Monotone	TRUE	TRUE	FALSE	TRUE	TRUE	TRUE	FALSE	TRUE
pcodonTATATG	1267	0.125795	0.00586401	0.069	0.188	0.0607064	0.195354	202	0.388126	0.291826	0	1	3.44404e-14	1	1.06479e-16	MIC not significant	FALSE	TRUE	FALSE	FALSE	FALSE	TRUE	FALSE	FALSE
pcodonTATACT	1267	0.102523	0.00615969	0.893	0.986	0.877933	0.975157	113	0.430965	0.274382	1.31579e-05	0.997776	4.3162e-09	0.990363	2.62294e-09	MIC not significant	FALSE	TRUE	FALSE	FALSE	FALSE	TRUE	FALSE	FALSE
pcodonTATACC	1267	0.114461	0.0149712	0.241	0.925	0.243067	0.911415	96	0.440462	0.326317	6.57895e-05	0.999895	2.32892e-08	0.999578	1.21877e-09	MIC not significant	FALSE	TRUE	FALSE	FALSE	FALSE	TRUE	FALSE	FALSE
pcodonTATACG	1267	0.130079	0.0229328	0.012	0.736	0.00873838	0.748592	161	0.385817	0.268175	0	1	2.04834e-10	0.999929	1.99366e-12	Monotone	TRUE	TRUE	FALSE	TRUE	TRUE	TRUE	FALSE	TRUE
pcodonTATAAT	1267	0.0960306	1.35638e-05	0.983	0.973	0.967766	0.960232	63	0.750896	0.480988	0	0.536545	1.61082e-20	0.573255	2.96616e-10	MIC not significant	FALSE	TRUE	FALSE	FALSE	FALSE	TRUE	FALSE	FALSE
pcodonTATAAC	1267	0.122445	0.00635521	0.018	0.087	0.0132715	0.0846041	76	0.514389	0.266406	1.9802e-05	0.39803	1.86098e-10	0.438422	2.59869e-06	non-significant monotone/non-monotone	FALSE	TRUE	FALSE	FALSE	TRUE	TRUE	FALSE	FALSE
pcodonTATAAG	1267	0.141184	0.037065	0.001	0.892	0.00019896	0.897812	192	0.364993	0.283972	0	1	8.48573e-12	1	1.77075e-15	Monotone	TRUE	TRUE	FALSE	TRUE	TRUE	TRUE	FALSE	TRUE
pcodonTATAGT	1267	0.104246	0.00257714	0.715	0.821	0.730089	0.814263	72	0.510061	0.405758	6.57895e-05	0.999947	1.03639e-08	0.999692	1.79468e-09	MIC not significant	FALSE	TRUE	FALSE	FALSE	FALSE	TRUE	FALSE	FALSE
pcodonTATAGC	1267	0.121824	0.00532528	0.037	0.124	0.034036	0.121852	89	0.52328	0.349955	0	0.989802	2.85014e-12	0.974712	1.03118e-09	Monotone	FALSE	TRUE	FALSE	FALSE	FALSE	TRUE	FALSE	FALSE
pcodonTATAGA	1267	0.108949	0.010759	0.438	0.921	0.455371	0.92005	67	0.372974	0.225424	0.048	0.999	0.0269875	0.9943	4.91912e-05	MIC not significant	FALSE	FALSE	FALSE	FALSE	FALSE	TRUE	FALSE	FALSE
pcodonTATAGG	1267	0.127637	0.0226873	0.023	0.821	0.0135812	0.821504	143	0.356766	0.22784	0.000171053	0.999947	8.35593e-07	0.9992	1.66484e-09	Monotone	FALSE	TRUE	FALSE	FALSE	TRUE	TRUE	FALSE	TRUE
pcodonTATGTC	1267	0.112488	0.00291424	0.358	0.464	0.376219	0.495704	105	0.402614	0.278272	0.000644737	0.999987	1.16315e-05	0.999757	7.38478e-09	MIC not significant	FALSE	TRUE	FALSE	FALSE	FALSE	TRUE	FALSE	FALSE
pcodonTATGTG	1267	0.102804	0.00346229	0.835	0.913	0.84698	0.923767	99	0.420589	0.359077	9.90099e-05	1	8.14975e-08	0.999999	5.65458e-11	MIC not significant	FALSE	TRUE	FALSE	FALSE	FALSE	TRUE	FALSE	FALSE
pcodonTATGCT	1267	0.112026	0.00705747	0.405	0.76	0.430583	0.757006	117	0.348335	0.226411	0.00202632	0.999947	0.000161978	0.99954	5.89758e-08	MIC not significant	FALSE	TRUE	FALSE	FALSE	FALSE	TRUE	FALSE	FALSE
pcodonTATGCC	1267	0.124951	0.0197615	0.009	0.608	0.00559229	0.624389	73	0.495511	0.30512	6.57895e-05	0.939737	3.20808e-08	0.916261	4.0522e-07	non-significant monotone/non-monotone	TRUE	TRUE	FALSE	FALSE	TRUE	TRUE	FALSE	FALSE
pcodonTATGCA	1267	0.108758	0.0040186	0.401	0.623	0.410574	0.628073	48	0.405543	0.374179	0.060604	1	0.0460687	0.999995	6.25034e-06	MIC not significant	FALSE	FALSE	FALSE	FALSE	FALSE	FALSE	FALSE	FALSE
pcodonTATGCG	1267	0.126741	0.0112929	0.039	0.316	0.0306103	0.320102	153	0.331556	0.207524	0.00175	0.999987	0.000124545	0.999898	3.28396e-09	Monotone	FALSE	TRUE	FALSE	FALSE	FALSE	TRUE	FALSE	FALSE
pcodonTATGAA	1267	0.119969	0.00820089	0.042	0.234	0.0329224	0.24003	72	0.269409	0.180291	0.409013	0.999987	0.456373	0.99991	0.000201289	MIC not significant	FALSE	FALSE	FALSE	FALSE	FALSE	FALSE	FALSE	FALSE
pcodonTATGAG	1267	0.0993229	5.82133e-05	0.944	0.931	0.93027	0.913768	43	0.29663	0.288573	0.258763	0.999987	0.299972	0.999986	0.000203836	MIC not significant	FALSE	FALSE	FALSE	FALSE	FALSE	FALSE	FALSE	FALSE
pcodonTATGGT	1267	0.129701	0.0173694	0.019	0.562	0.0188657	0.569996	196	0.371048	0.293595	0	1	1.44685e-13	1	2.38046e-16	Monotone	FALSE	TRUE	FALSE	FALSE	FALSE	TRUE	FALSE	FALSE
pcodonTATGGC	1267	0.117131	0.0150061	0.16	0.845	0.171794	0.844246	106	0.447612	0.443598	3.9604e-05	1	1.40235e-08	1	6.6693e-15	MIC not significant	FALSE	TRUE	FALSE	FALSE	FALSE	TRUE	FALSE	FALSE
pcodonTATGGA	1267	0.129168	0.0165234	0.033	0.483	0.0204237	0.517435	172	0.354391	0.188775	1.31579e-05	0.959789	2.09257e-09	0.942435	2.59925e-09	Monotone	FALSE	TRUE	FALSE	FALSE	FALSE	TRUE	FALSE	FALSE
pcodonTATGGG	1267	0.120866	0.00376756	0.183	0.304	0.195763	0.326259	194	0.33352	0.214351	4.9505e-05	1	1.57761e-08	0.999871	1.06727e-11	MIC not significant	FALSE	TRUE	FALSE	FALSE	FALSE	TRUE	FALSE	FALSE
pcodonTACTTT	1267	0.109956	1.51007e-05	0.551	0.506	0.586006	0.543478	130	0.384836	0.339109	0.000237624	1	7.12812e-07	1	3.66721e-13	MIC not significant	FALSE	TRUE	FALSE	FALSE	FALSE	TRUE	FALSE	FALSE
pcodonTACTTC	1267	0.114238	0.00685603	0.2	0.498	0.199984	0.514788	83	0.284434	0.124752	0.353079	0.998513	0.392856	0.993704	0.00105561	MIC not significant	FALSE	FALSE	FALSE	FALSE	FALSE	FALSE	FALSE	FALSE
pcodonTACTTA	1267	0.108853	0.00172889	0.535	0.584	0.559501	0.606011	100	0.433265	0.226553	0.000105263	0.683697	5.48558e-09	0.702952	5.58429e-07	MIC not significant	FALSE	TRUE	FALSE	FALSE	FALSE	TRUE	FALSE	FALSE
pcodonTACTTG	1267	0.115977	0.00192362	0.242	0.281	0.250996	0.305561	125	0.443223	0.338449	0	1	2.48435e-10	0.999991	1.12063e-12	MIC not significant	FALSE	TRUE	FALSE	FALSE	FALSE	TRUE	FALSE	FALSE
pcodonTACTCT	1267	0.11558	0.00158384	0.102	0.112	0.101215	0.123527	54	0.53878	0.441518	0.000315789	0.999895	3.597e-07	0.999212	4.28499e-08	MIC not significant	FALSE	TRUE	FALSE	FALSE	FALSE	TRUE	FALSE	FALSE
pcodonTACTCC	1267	0.104483	0.00214272	0.655	0.753	0.690766	0.772294	44	0.329761	0.198493	0.111	0.993	0.121814	0.975095	0.0026731	MIC not significant	FALSE	FALSE	FALSE	FALSE	FALSE	FALSE	FALSE	FALSE
pcodonTACTCG	1267	0.113978	0.00108343	0.164	0.164	0.178624	0.189335	56	0.472244	0.374034	0.00144737	0.999803	3.19711e-05	0.998963	5.52073e-07	MIC not significant	FALSE	TRUE	FALSE	FALSE	FALSE	TRUE	FALSE	FALSE
pcodonTACTAT	1267	0.104839	0.00322137	0.68	0.827	0.695663	0.833421	42	0.338832	0.219318	0.131	0.994	0.134568	0.986326	0.00176127	MIC not significant	FALSE	FALSE	FALSE	FALSE	FALSE	FALSE	FALSE	FALSE
pcodonTACTAC	1267	0.114437	0.00406911	0.112	0.256	0.11147	0.258675	44	0.58055	0.252136	0.000118421	0.0613158	7.75807e-09	0.0486712	0.000514718	MIC not significant	FALSE	TRUE	FALSE	FALSE	FALSE	TRUE	FALSE	FALSE
pcodonTACTAG	1267	0.110052	0.0005125	0.322	0.301	0.323021	0.305823	52	0.47467	0.293723	0.004	0.97	0.000231124	0.952434	4.43634e-05	MIC not significant	FALSE	TRUE	FALSE	FALSE	FALSE	TRUE	FALSE	FALSE
pcodonTACTGT	1267	0.10038	6.14079e-05	0.883	0.856	0.877908	0.856261	51	0.459812	0.249254	0.003	0.896	0.000751994	0.88195	0.000191927	MIC not significant	FALSE	TRUE	FALSE	FALSE	FALSE	TRUE	FALSE	FALSE
pcodonTACTGC	1267	0.108395	0.00479989	0.404	0.687	0.433025	0.704834	48	0.366566	0.252353	0.141974	0.999724	0.148123	0.998569	0.000274502	MIC not significant	FALSE	FALSE	FALSE	FALSE	FALSE	FALSE	FALSE	FALSE
pcodonTACTGA	1267	0.104649	0.00479571	0.671	0.898	0.686781	0.877737	46	0.595702	0.360911	5.26316e-05	0.415408	1.44031e-10	0.467113	1.0139e-05	MIC not significant	FALSE	TRUE	FALSE	FALSE	FALSE	TRUE	FALSE	FALSE
pcodonTACTGG	1267	0.112505	0.00223578	0.241	0.3	0.247724	0.322536	72	0.486016	0.443766	0.000237624	1	2.66984e-07	0.999999	1.70222e-10	MIC not significant	FALSE	TRUE	FALSE	FALSE	FALSE	TRUE	FALSE	FALSE
pcodonTACCTT	1267	0.116318	0.00870594	0.126	0.449	0.107039	0.484256	72	0.387692	0.222188	0.02	0.996	0.0033093	0.979473	2.92431e-05	MIC not significant	FALSE	TRUE	FALSE	FALSE	FALSE	TRUE	FALSE	FALSE
pcodonTACATT	1267	0.105287	0.000204472	0.759	0.74	0.767289	0.741016	105	0.509384	0.442491	0	1	2.34851e-13	1	9.96401e-15	MIC not significant	FALSE	TRUE	FALSE	FALSE	FALSE	TRUE	FALSE	FALSE
pcodonTACATC	1267	0.108453	0.000399136	0.414	0.391	0.446928	0.427102	52	0.422097	0.243849	0.018	0.986	0.00445224	0.959879	0.000239313	MIC not significant	FALSE	TRUE	FALSE	FALSE	FALSE	TRUE	FALSE	FALSE
pcodonTACATA	1267	0.104223	0.000364067	0.658	0.634	0.683322	0.658972	54	0.380597	0.163471	0.041	0.815	0.0232835	0.803833	0.00242786	MIC not significant	FALSE	FALSE	FALSE	FALSE	FALSE	TRUE	FALSE	FALSE
pcodonTACATG	1267	0.110549	0.000700772	0.5	0.499	0.513511	0.509262	119	0.374911	0.35616	0.000237624	1	2.14871e-06	1	7.91149e-13	MIC not significant	FALSE	TRUE	FALSE	FALSE	FALSE	TRUE	FALSE	FALSE
pcodonTACACC	1267	0.103431	0.00452763	0.751	0.925	0.771681	0.918264	45	0.424295	0.320067	0.006	0.995	0.00123219	0.992253	6.89592e-05	MIC not significant	FALSE	TRUE	FALSE	FALSE	FALSE	TRUE	FALSE	FALSE
pcodonTACACG	1267	0.109996	0.00664793	0.332	0.673	0.35152	0.70678	62	0.391887	0.240559	0.009	0.989	0.00104177	0.963524	6.4648e-05	MIC not significant	FALSE	TRUE	FALSE	FALSE	FALSE	TRUE	FALSE	FALSE
pcodonTACAAT	1267	0.109982	0.00202745	0.304	0.373	0.310147	0.388911	45	0.560756	0.48595	0.000144737	0.999566	2.57173e-08	0.998585	3.46378e-07	MIC not significant	FALSE	TRUE	FALSE	FALSE	FALSE	TRUE	FALSE	FALSE
pcodonTACAAG	1267	0.113949	0.00177694	0.176	0.222	0.180467	0.220132	66	0.506563	0.380061	0.0005	0.999842	1.35995e-06	0.998957	7.64567e-08	MIC not significant	FALSE	TRUE	FALSE	FALSE	FALSE	TRUE	FALSE	FALSE
pcodonTACAGG	1267	0.10363	0.000836229	0.747	0.766	0.766958	0.768979	53	0.680036	0.469737	2.63158e-05	0.866816	7.60142e-14	0.850363	5.35984e-08	MIC not significant	FALSE	TRUE	FALSE	FALSE	FALSE	TRUE	FALSE	FALSE
pcodonTACGCT	1267	0.108766	0.00157562	0.402	0.442	0.424458	0.475978	53	0.539983	0.245985	0.000407895	0.259118	7.16241e-07	0.289246	0.000192722	MIC not significant	FALSE	TRUE	FALSE	FALSE	FALSE	TRUE	FALSE	FALSE
pcodonTACGCC	1267	0.121611	0.0153946	0.017	0.516	0.00870242	0.551935	46	0.454049	0.274227	0.006	0.849	0.000217635	0.82592	0.000187963	non-significant monotone/non-monotone	FALSE	TRUE	FALSE	FALSE	TRUE	TRUE	FALSE	FALSE
pcodonTACGCG	1267	0.107878	0.0079787	0.513	0.886	0.523486	0.877809	68	0.299345	0.197131	0.27697	1	0.310876	0.999781	0.000149073	MIC not significant	FALSE	FALSE	FALSE	FALSE	FALSE	FALSE	FALSE	FALSE
pcodonTACGGT	1267	0.12388	0.00473738	0.006	0.022	0.00317054	0.0178858	59	0.441975	0.339267	0.00252632	0.999684	9.48789e-05	0.998452	2.11628e-06	Monotone	TRUE	TRUE	FALSE	TRUE	TRUE	TRUE	FALSE	TRUE
pcodonTACGGA	1267	0.112837	0.00237944	0.173	0.249	0.16846	0.244462	44	0.354964	0.201975	0.082	0.969	0.0664837	0.93999	0.00221064	MIC not significant	FALSE	FALSE	FALSE	FALSE	FALSE	FALSE	FALSE	FALSE
pcodonTACGGG	1267	0.106142	0.000359955	0.555	0.512	0.584985	0.551301	42	0.479778	0.328664	0.005	0.978	0.000179907	0.960707	9.6909e-05	MIC not significant	FALSE	TRUE	FALSE	FALSE	FALSE	TRUE	FALSE	FALSE
pcodonTAATTT	1267	0.102803	0.00426558	0.893	0.964	0.892462	0.957391	130	0.313299	0.209715	0.0177327	1	0.00761875	0.99999	4.29569e-08	MIC not significant	FALSE	TRUE	FALSE	FALSE	FALSE	TRUE	FALSE	FALSE
pcodonTAATTC	1267	0.116257	0.00404336	0.113	0.226	0.110638	0.226487	72	0.441259	0.380437	0.00135644	1	2.65227e-05	0.999994	7.96806e-09	MIC not significant	FALSE	TRUE	FALSE	FALSE	FALSE	TRUE	FALSE	FALSE
pcodonTAATTA	1267	0.100689	0.00181554	0.905	0.938	0.892916	0.920455	92	0.307344	0.234599	0.0802178	1	0.0697891	0.999997	9.9816e-07	MIC not significant	FALSE	FALSE	FALSE	FALSE	FALSE	FALSE	FALSE	FALSE
pcodonTAATTG	1267	0.111629	0.00180083	0.307	0.366	0.317966	0.373645	76	0.384077	0.339368	0.00590099	1	0.000836186	0.999999	3.37695e-08	MIC not significant	FALSE	TRUE	FALSE	FALSE	FALSE	TRUE	FALSE	FALSE
pcodonTAATCT	1267	0.109624	1.89203e-05	0.339	0.299	0.364668	0.316644	43	0.290863	0.242804	0.298092	0.999974	0.343773	0.999768	0.000911821	MIC not significant	FALSE	FALSE	FALSE	FALSE	FALSE	FALSE	FALSE	FALSE
pcodonTAATAT	1267	0.114392	0.00340245	0.147	0.252	0.143871	0.255575	59	0.447201	0.319984	0.001	0.999	2.74015e-05	0.992908	3.03284e-06	MIC not significant	FALSE	TRUE	FALSE	FALSE	FALSE	TRUE	FALSE	FALSE
pcodonTAATGT	1267	0.0978158	5.94174e-07	0.965	0.957	0.957076	0.945295	45	0.634243	0.558062	1.31579e-05	0.999618	5.18315e-12	0.998454	4.15691e-08	MIC not significant	FALSE	TRUE	FALSE	FALSE	FALSE	TRUE	FALSE	FALSE
pcodonTAATGC	1267	0.108456	0.000622611	0.394	0.381	0.441404	0.429819	42	0.440174	0.264361	0.017	0.915	0.003627	0.877437	0.000495632	MIC not significant	FALSE	TRUE	FALSE	FALSE	FALSE	TRUE	FALSE	FALSE
pcodonTAATGG	1267	0.111584	0.000197551	0.29	0.268	0.311837	0.281294	69	0.431772	0.286863	0.003	0.999	0.000252603	0.994036	2.11477e-06	MIC not significant	FALSE	TRUE	FALSE	FALSE	FALSE	TRUE	FALSE	FALSE
pcodonTAACTT	1267	0.114252	0.00293841	0.206	0.32	0.212905	0.318233	86	0.526429	0.320144	0	0.909802	3.60254e-11	0.890825	1.37155e-08	MIC not significant	FALSE	TRUE	FALSE	FALSE	FALSE	TRUE	FALSE	FALSE
pcodonTAACCT	1267	0.106104	0.00729449	0.572	0.908	0.58514	0.904865	54	0.476153	0.404086	0.00219737	0.999987	8.98101e-05	0.99988	5.07355e-07	MIC not significant	FALSE	TRUE	FALSE	FALSE	FALSE	TRUE	FALSE	FALSE
pcodonTAAATT	1267	0.102044	0.00466386	0.89	0.97	0.886427	0.96009	117	0.376461	0.287998	0.000524752	1	4.86068e-06	0.999995	4.46577e-10	MIC not significant	FALSE	TRUE	FALSE	FALSE	FALSE	TRUE	FALSE	FALSE
pcodonTAAATC	1267	0.120457	0.00787222	0.027	0.15	0.0155432	0.161444	54	0.438895	0.395632	0.00715842	1	0.00107834	0.999987	3.51153e-07	Monotone	FALSE	TRUE	FALSE	FALSE	FALSE	TRUE	FALSE	FALSE
pcodonTAAATA	1267	0.107631	0.0013431	0.435	0.474	0.467138	0.5023	55	0.392068	0.27954	0.028	0.999	0.0123755	0.998271	4.37431e-05	MIC not significant	FALSE	TRUE	FALSE	FALSE	FALSE	TRUE	FALSE	FALSE
pcodonTAAATG	1267	0.104602	0.00317004	0.704	0.82	0.712867	0.819053	78	0.317433	0.279389	0.0615248	1	0.0479036	1	9.88815e-07	MIC not significant	FALSE	FALSE	FALSE	FALSE	FALSE	FALSE	FALSE	FALSE
pcodonTAAACT	1267	0.121356	0.00570287	0.025	0.089	0.0190656	0.0934563	64	0.492221	0.429353	0.00114851	1	1.5955e-05	0.999996	4.23037e-09	Monotone	FALSE	TRUE	FALSE	FALSE	FALSE	TRUE	FALSE	FALSE
pcodonTAAACC	1267	0.108921	0.00263116	0.381	0.512	0.416428	0.544126	42	0.575253	0.444841	0.001	0.996	6.76912e-07	0.978205	2.80692e-06	MIC not significant	FALSE	TRUE	FALSE	FALSE	FALSE	TRUE	FALSE	FALSE
pcodonTAAACG	1267	0.111341	0.00608396	0.288	0.593	0.298439	0.606416	69	0.398053	0.370273	0.0127624	1	0.00333385	1	2.9141e-08	MIC not significant	FALSE	TRUE	FALSE	FALSE	FALSE	TRUE	FALSE	FALSE
pcodonTAAAAG	1267	0.120549	0.00542436	0.019	0.077	0.0141488	0.0748877	51	0.452912	0.38676	0.0101711	0.999961	0.00182955	0.999931	1.99328e-06	Monotone	FALSE	TRUE	FALSE	FALSE	TRUE	TRUE	FALSE	TRUE
pcodonTAAAGG	1267	0.111279	0.0031089	0.29	0.42	0.302343	0.434229	61	0.737937	0.584112	0	0.984238	1.91459e-25	0.963574	7.69677e-13	MIC not significant	FALSE	TRUE	FALSE	FALSE	FALSE	TRUE	FALSE	FALSE
pcodonTAAGTC	1267	0.0992468	0.00102386	0.935	0.955	0.928446	0.93735	41	0.448821	0.258609	0.009	0.879	0.00188529	0.8545	0.000805944	MIC not significant	FALSE	TRUE	FALSE	FALSE	FALSE	TRUE	FALSE	FALSE
pcodonTAAGCG	1267	0.108631	0.00124861	0.4	0.428	0.407989	0.439148	51	0.382025	0.265354	0.053	0.999	0.0378257	0.998397	0.000109786	MIC not significant	FALSE	FALSE	FALSE	FALSE	FALSE	FALSE	FALSE	FALSE
pcodonTAAGGT	1267	0.103927	0.00694706	0.747	0.955	0.745228	0.943443	75	0.421256	0.435325	0.00159406	1	5.04292e-05	1	1.21011e-10	MIC not significant	FALSE	TRUE	FALSE	FALSE	FALSE	TRUE	FALSE	FALSE
pcodonTAAGGC	1267	0.1235	0.00946587	0.008	0.124	0.00435639	0.114982	54	0.361426	0.154744	0.075	0.852	0.0628027	0.836872	0.00325352	MIC not significant	TRUE	FALSE	FALSE	FALSE	TRUE	FALSE	FALSE	FALSE
pcodonTAAGGA	1267	0.118837	0.0113398	0.057	0.433	0.0479657	0.472144	65	0.439236	0.263811	0.003	0.995	0.000754643	0.976879	1.2107e-05	MIC not significant	FALSE	TRUE	FALSE	FALSE	FALSE	TRUE	FALSE	FALSE
pcodonTAAGGG	1267	0.114353	4.64224e-05	0.222	0.189	0.221707	0.191051	88	0.550546	0.434888	0	0.99997	6.16955e-14	0.999731	2.81719e-12	MIC not significant	FALSE	TRUE	FALSE	FALSE	FALSE	TRUE	FALSE	FALSE
pcodonTAGTTT	1267	0.109944	0.000911888	0.648	0.664	0.67085	0.677774	168	0.420528	0.28636	0	0.999881	7.89606e-17	0.998546	7.85828e-14	MIC not significant	FALSE	TRUE	FALSE	FALSE	FALSE	TRUE	FALSE	FALSE
pcodonTAGTTC	1267	0.107932	0.00212424	0.572	0.654	0.582996	0.65369	93	0.388828	0.240738	0.00178947	0.998868	7.73674e-05	0.993362	5.95133e-07	MIC not significant	FALSE	TRUE	FALSE	FALSE	FALSE	TRUE	FALSE	FALSE
pcodonTAGTTA	1267	0.118629	0.000980342	0.095	0.096	0.0881839	0.0905364	97	0.394913	0.393815	0.000732673	1	9.56416e-06	1	6.04513e-12	MIC not significant	FALSE	TRUE	FALSE	FALSE	FALSE	TRUE	FALSE	FALSE
pcodonTAGTTG	1267	0.107173	0.00202983	0.708	0.771	0.717636	0.772946	129	0.368226	0.238024	0.000723684	0.999987	1.63963e-05	0.999656	4.50791e-09	MIC not significant	FALSE	TRUE	FALSE	FALSE	FALSE	TRUE	FALSE	FALSE
pcodonTAGTCT	1267	0.113609	0.00024922	0.158	0.141	0.149194	0.129039	55	0.41253	0.209655	0.017	0.861	0.00496175	0.847168	0.000439723	MIC not significant	FALSE	TRUE	FALSE	FALSE	FALSE	TRUE	FALSE	FALSE
pcodonTAGTCG	1267	0.100233	8.8078e-05	0.887	0.871	0.878361	0.859034	69	0.37879	0.340121	0.0244356	1	0.0109008	1	1.45229e-07	MIC not significant	FALSE	TRUE	FALSE	FALSE	FALSE	TRUE	FALSE	FALSE
pcodonTAGTAT	1267	0.111429	0.00465954	0.271	0.493	0.26801	0.5076	66	0.405907	0.276792	0.0146447	0.99975	0.00455223	0.998578	5.71092e-06	MIC not significant	FALSE	TRUE	FALSE	FALSE	FALSE	TRUE	FALSE	FALSE
pcodonTAGTAC	1267	0.115448	0.00125796	0.089	0.102	0.0864097	0.0955313	45	0.598028	0.503871	7.89474e-05	0.999039	4.84851e-10	0.995421	4.76154e-08	MIC not significant	FALSE	TRUE	FALSE	FALSE	FALSE	TRUE	FALSE	FALSE
pcodonTAGTAG	1267	0.120668	0.00297652	0.03	0.052	0.0271814	0.05483	65	0.32714	0.108694	0.187	0.894	0.19629	0.869967	0.00732096	MIC not significant	FALSE	FALSE	FALSE	FALSE	FALSE	FALSE	FALSE	FALSE
pcodonTAGTGT	1267	0.104592	0.000875675	0.683	0.69	0.690921	0.697141	58	0.623287	0.495675	1.31579e-05	0.998316	1.31856e-13	0.992705	7.02871e-10	MIC not significant	FALSE	TRUE	FALSE	FALSE	FALSE	TRUE	FALSE	FALSE
pcodonTAGTGC	1267	0.113189	0.00159802	0.223	0.246	0.224287	0.263398	62	0.505617	0.411275	9.21053e-05	0.999737	1.65122e-08	0.998801	1.9581e-08	MIC not significant	FALSE	TRUE	FALSE	FALSE	FALSE	TRUE	FALSE	FALSE
pcodonTAGTGA	1267	0.102888	0.0016549	0.772	0.816	0.768335	0.815789	57	0.453147	0.313416	0.004	0.999	0.000143688	0.986938	5.9626e-06	MIC not significant	FALSE	TRUE	FALSE	FALSE	FALSE	TRUE	FALSE	FALSE
pcodonTAGTGG	1267	0.111819	0.00817929	0.359	0.771	0.371874	0.773499	99	0.418067	0.297761	0.000197368	0.999868	1.12148e-07	0.999005	5.19055e-09	MIC not significant	FALSE	TRUE	FALSE	FALSE	FALSE	TRUE	FALSE	FALSE
pcodonTAGCTT	1267	0.111183	0.00144396	0.349	0.38	0.366796	0.402889	73	0.444372	0.368588	0.000970297	1	1.17888e-05	0.999976	1.23863e-08	MIC not significant	FALSE	TRUE	FALSE	FALSE	FALSE	TRUE	FALSE	FALSE
pcodonTAGATT	1267	0.128811	0.00602841	0.031	0.109	0.0280896	0.110234	199	0.322364	0.318729	4.9505e-05	1	5.57141e-08	1	3.8009e-18	Monotone	FALSE	TRUE	FALSE	FALSE	FALSE	TRUE	FALSE	FALSE
pcodonTAGATC	1267	0.115894	0.000907435	0.196	0.198	0.188883	0.194682	98	0.370709	0.29751	0.00169307	1	8.91346e-05	0.999996	6.33495e-09	MIC not significant	FALSE	TRUE	FALSE	FALSE	FALSE	TRUE	FALSE	FALSE
pcodonTAGATA	1267	0.110968	0.00488276	0.392	0.604	0.384004	0.622523	88	0.454887	0.440687	0.000227723	1	3.08521e-07	1	1.7966e-12	MIC not significant	FALSE	TRUE	FALSE	FALSE	FALSE	TRUE	FALSE	FALSE
pcodonTAGATG	1267	0.114833	0.00513693	0.374	0.614	0.402723	0.625687	160	0.438078	0.327014	0	1	1.00644e-16	0.999976	2.82929e-15	MIC not significant	FALSE	TRUE	FALSE	FALSE	FALSE	TRUE	FALSE	FALSE
pcodonTAGACT	1267	0.111702	0.000184956	0.339	0.305	0.353946	0.318035	85	0.452487	0.340046	0.000355263	0.999974	2.35836e-06	0.99987	8.5133e-09	MIC not significant	FALSE	TRUE	FALSE	FALSE	FALSE	TRUE	FALSE	FALSE
pcodonTAGACC	1267	0.103183	0.00479256	0.754	0.918	0.764038	0.90532	76	0.501973	0.311094	5.26316e-05	0.91125	1.46156e-09	0.891606	2.79683e-07	MIC not significant	FALSE	TRUE	FALSE	FALSE	FALSE	TRUE	FALSE	FALSE
pcodonTAGACG	1267	0.111446	0.0095991	0.404	0.857	0.418758	0.854395	105	0.514797	0.439061	0	1	9.43847e-14	1	1.37162e-14	MIC not significant	FALSE	TRUE	FALSE	FALSE	FALSE	TRUE	FALSE	FALSE
pcodonTAGAAT	1267	0.108986	0.00131418	0.382	0.42	0.39816	0.431638	54	0.309457	0.214303	0.240118	0.999776	0.270637	0.999241	0.000423859	MIC not significant	FALSE	FALSE	FALSE	FALSE	FALSE	FALSE	FALSE	FALSE
pcodonTAGAAC	1267	0.116599	0.00229761	0.087	0.13	0.0802182	0.118079	54	0.691486	0.420614	0	0.373931	1.44582e-15	0.415887	1.13921e-07	MIC not significant	FALSE	TRUE	FALSE	FALSE	FALSE	TRUE	FALSE	FALSE
pcodonTAGAAG	1267	0.123223	0.00130135	0.049	0.059	0.0422537	0.0479346	122	0.4439	0.333917	0	0.99996	6.60179e-13	0.99984	3.19503e-12	Monotone	FALSE	TRUE	FALSE	FALSE	FALSE	TRUE	FALSE	FALSE
pcodonTAGAGT	1267	0.0998579	6.13845e-06	0.926	0.901	0.910837	0.885924	43	0.657502	0.432115	1.31579e-05	0.596118	6.49494e-12	0.628611	3.19319e-06	MIC not significant	FALSE	TRUE	FALSE	FALSE	FALSE	TRUE	FALSE	FALSE
pcodonTAGAGC	1267	0.109865	0.00482135	0.344	0.584	0.355446	0.61533	58	0.389054	0.251078	0.012	0.998	0.00383482	0.988359	6.16818e-05	MIC not significant	FALSE	TRUE	FALSE	FALSE	FALSE	TRUE	FALSE	FALSE
pcodonTAGAGG	1267	0.112461	0.00631321	0.338	0.651	0.364698	0.672232	103	0.50436	0.441538	9.90099e-06	1	4.29174e-12	1	1.96896e-14	MIC not significant	FALSE	TRUE	FALSE	FALSE	FALSE	TRUE	FALSE	FALSE
pcodonTAGGTC	1267	0.113235	0.00201181	0.166	0.209	0.164685	0.216478	46	0.316473	0.203651	0.112	0.992	0.114216	0.984694	0.00164516	MIC not significant	FALSE	FALSE	FALSE	FALSE	FALSE	FALSE	FALSE	FALSE
pcodonTAGGTG	1267	0.114751	3.42123e-05	0.144	0.113	0.132501	0.101001	57	0.389001	0.329671	0.0190495	1	0.00688665	0.999947	3.01528e-06	MIC not significant	FALSE	TRUE	FALSE	FALSE	FALSE	TRUE	FALSE	FALSE
pcodonTAGGCT	1267	0.117385	0.00817022	0.101	0.37	0.0977378	0.408795	78	0.457783	0.284351	0.000144737	0.963579	1.35125e-07	0.940776	4.99721e-07	MIC not significant	FALSE	TRUE	FALSE	FALSE	FALSE	TRUE	FALSE	FALSE
pcodonTAGGCC	1267	0.115178	0.00382765	0.114	0.223	0.110774	0.231951	49	0.538351	0.351861	0.002	0.984	9.83454e-06	0.957575	7.07191e-06	MIC not significant	FALSE	TRUE	FALSE	FALSE	FALSE	TRUE	FALSE	FALSE
pcodonTAGGCG	1267	0.126729	0.0109487	0.01	0.144	0.00624938	0.148578	93	0.407745	0.226358	0.000723684	0.965816	1.15017e-05	0.943151	1.4377e-06	Monotone	TRUE	TRUE	FALSE	TRUE	TRUE	TRUE	FALSE	FALSE
pcodonTAGGGT	1267	0.109694	0.0049886	0.482	0.694	0.493979	0.716104	99	0.409279	0.332196	0.000207921	1	4.11048e-07	0.999993	4.30321e-10	MIC not significant	FALSE	TRUE	FALSE	FALSE	FALSE	TRUE	FALSE	FALSE
pcodonTAGGGC	1267	0.116764	0.0055218	0.12	0.281	0.113304	0.296845	74	0.304061	0.134121	0.136	0.983	0.136456	0.966021	0.00133186	MIC not significant	FALSE	FALSE	FALSE	FALSE	FALSE	FALSE	FALSE	FALSE
pcodonTAGGGA	1267	0.117383	0.00792556	0.11	0.388	0.108306	0.418877	90	0.489582	0.342484	0	0.999218	5.19283e-10	0.995386	1.38104e-09	MIC not significant	FALSE	TRUE	FALSE	FALSE	FALSE	TRUE	FALSE	FALSE
pcodonTAGGGG	1267	0.119381	0.00271787	0.071	0.114	0.0672959	0.109875	89	0.446139	0.27684	0.000223684	0.993211	5.19771e-07	0.980357	1.18733e-07	MIC not significant	FALSE	TRUE	FALSE	FALSE	FALSE	TRUE	FALSE	FALSE
pcodonTGTTTT	1267	0.122593	0.00324927	0.096	0.165	0.0947798	0.163804	163	0.421074	0.380322	0	1	3.0884e-15	1	1.87471e-18	MIC not significant	FALSE	TRUE	FALSE	FALSE	FALSE	TRUE	FALSE	FALSE
pcodonTGTTTC	1267	0.105727	0.00441201	0.662	0.832	0.691967	0.8459	95	0.305201	0.164454	0.0684868	0.999211	0.0546287	0.995945	5.29762e-05	MIC not significant	FALSE	FALSE	FALSE	FALSE	FALSE	FALSE	FALSE	FALSE
pcodonTGTTTA	1267	0.118203	0.00746131	0.173	0.44	0.171097	0.472541	124	0.431637	0.301277	3.94737e-05	0.999961	4.55669e-09	0.999777	4.104e-11	MIC not significant	FALSE	TRUE	FALSE	FALSE	FALSE	TRUE	FALSE	FALSE
pcodonTGTTTG	1267	0.126261	0.000274431	0.032	0.026	0.0285916	0.0237786	157	0.340452	0.272548	0.000574257	1	1.06878e-05	1	2.35002e-12	Monotone	FALSE	TRUE	FALSE	FALSE	FALSE	TRUE	FALSE	FALSE
pcodonTGTTCT	1267	0.0974073	0.0011282	0.949	0.96	0.946101	0.952698	73	0.371506	0.265041	0.0168421	0.999934	0.00577712	0.999551	3.16425e-06	MIC not significant	FALSE	TRUE	FALSE	FALSE	FALSE	TRUE	FALSE	FALSE
pcodonTGTTCC	1267	0.101017	0.00394076	0.881	0.978	0.877887	0.961623	43	0.471336	0.411067	0.00455263	0.999855	0.000211268	0.999431	3.62102e-06	MIC not significant	FALSE	TRUE	FALSE	FALSE	FALSE	TRUE	FALSE	FALSE
pcodonTGTTCA	1267	0.110959	0.0001315	0.255	0.23	0.26661	0.22754	43	0.395387	0.350424	0.0299605	0.999947	0.0132978	0.999809	4.11999e-05	MIC not significant	FALSE	TRUE	FALSE	FALSE	FALSE	TRUE	FALSE	FALSE
pcodonTGTTCG	1267	0.115709	0.00310467	0.151	0.229	0.154947	0.249726	85	0.577515	0.482374	0	1	7.92477e-15	0.999977	1.6817e-13	MIC not significant	FALSE	TRUE	FALSE	FALSE	FALSE	TRUE	FALSE	FALSE
pcodonTGTTAT	1267	0.118757	0.00782524	0.1	0.365	0.0925094	0.37873	93	0.488429	0.326213	0	0.994228	5.7264e-11	0.982907	2.25471e-09	MIC not significant	FALSE	TRUE	FALSE	FALSE	FALSE	TRUE	FALSE	FALSE
pcodonTGTTAC	1267	0.106413	0.0015712	0.544	0.615	0.570442	0.622494	44	0.317486	0.217383	0.154	0.998	0.155069	0.993391	0.00159557	MIC not significant	FALSE	FALSE	FALSE	FALSE	FALSE	FALSE	FALSE	FALSE
pcodonTGTTAG	1267	0.10442	4.02526e-11	0.656	0.603	0.682634	0.641404	53	0.432126	0.252273	0.011	0.961	0.00229849	0.941373	0.000127022	MIC not significant	FALSE	TRUE	FALSE	FALSE	FALSE	TRUE	FALSE	FALSE
pcodonTGTTGT	1267	0.114199	0.000457172	0.152	0.14	0.156505	0.139	55	0.51777	0.523554	0.000366337	1	1.06355e-06	1	4.35236e-10	MIC not significant	FALSE	TRUE	FALSE	FALSE	FALSE	TRUE	FALSE	FALSE
pcodonTGTTGC	1267	0.110285	0.0084505	0.347	0.787	0.355044	0.789966	73	0.425464	0.268943	0.002	0.997	7.07218e-05	0.986136	2.60201e-06	MIC not significant	FALSE	TRUE	FALSE	FALSE	FALSE	TRUE	FALSE	FALSE
pcodonTGTTGA	1267	0.114913	0.00115746	0.207	0.209	0.213079	0.228871	95	0.42572	0.422773	0.00019802	1	3.51994e-07	1	1.00016e-12	MIC not significant	FALSE	TRUE	FALSE	FALSE	FALSE	TRUE	FALSE	FALSE
pcodonTGTTGG	1267	0.104319	0.00133307	0.802	0.834	0.810651	0.832596	104	0.491517	0.38316	0	1	2.70397e-11	0.999969	2.4957e-12	MIC not significant	FALSE	TRUE	FALSE	FALSE	FALSE	TRUE	FALSE	FALSE
pcodonTGTCTT	1267	0.102235	0.00364095	0.826	0.911	0.812647	0.906237	77	0.392223	0.215131	0.007	0.959	0.000593006	0.929354	2.15227e-05	MIC not significant	FALSE	TRUE	FALSE	FALSE	FALSE	TRUE	FALSE	FALSE
pcodonTGTCTA	1267	0.102368	0.000148828	0.831	0.798	0.828483	0.799968	40	0.4	0.288125	0.051	0.999	0.0365414	0.991297	0.000435483	MIC not significant	FALSE	FALSE	FALSE	FALSE	FALSE	FALSE	FALSE	FALSE
pcodonTGTCTG	1267	0.10266	4.63275e-05	0.782	0.743	0.79361	0.759884	44	0.688392	0.466929	0	0.582564	2.27112e-14	0.620002	3.19847e-07	MIC not significant	FALSE	TRUE	FALSE	FALSE	FALSE	TRUE	FALSE	FALSE
pcodonTGTCCT	1267	0.116162	0.00065363	0.129	0.124	0.126558	0.122492	77	0.410089	0.347946	0.00177228	1	5.21243e-05	0.999993	1.65136e-08	MIC not significant	FALSE	TRUE	FALSE	FALSE	FALSE	TRUE	FALSE	FALSE
pcodonTGTCCG	1267	0.108373	0.00232129	0.462	0.548	0.477894	0.570381	66	0.445801	0.336634	0.00387129	0.99999	0.000320097	0.999676	3.2925e-07	MIC not significant	FALSE	TRUE	FALSE	FALSE	FALSE	TRUE	FALSE	FALSE
pcodonTGTCGT	1267	0.10907	0.00373537	0.385	0.576	0.404085	0.587124	61	0.575398	0.38787	1.31579e-05	0.881671	2.98986e-12	0.862708	1.78377e-07	MIC not significant	FALSE	TRUE	FALSE	FALSE	FALSE	TRUE	FALSE	FALSE
pcodonTGTCGA	1267	0.10894	0.000190909	0.372	0.332	0.398217	0.359248	55	0.419385	0.326201	0.0122763	0.999868	0.00263655	0.999388	7.85936e-06	MIC not significant	FALSE	TRUE	FALSE	FALSE	FALSE	TRUE	FALSE	FALSE
pcodonTGTCGG	1267	0.108955	7.76567e-06	0.381	0.341	0.40592	0.350302	40	0.325668	0.108171	0.238	0.766	0.259512	0.757813	0.0387758	MIC not significant	FALSE	FALSE	FALSE	FALSE	FALSE	FALSE	FALSE	FALSE
pcodonTGTATT	1267	0.114762	0.0017017	0.349	0.389	0.360825	0.405456	150	0.390382	0.353898	2.9703e-05	1	1.21529e-08	1	9.97202e-16	MIC not significant	FALSE	TRUE	FALSE	FALSE	FALSE	TRUE	FALSE	FALSE
pcodonTGTATC	1267	0.115797	0.00294392	0.145	0.218	0.141282	0.220033	78	0.342197	0.1884	0.033	0.989	0.0152586	0.976854	7.18074e-05	MIC not significant	FALSE	TRUE	FALSE	FALSE	FALSE	TRUE	FALSE	FALSE
pcodonTGTATA	1267	0.0998299	0.000928657	0.92	0.931	0.902621	0.908181	81	0.656511	0.469948	0	0.883277	1.66398e-26	0.866947	1.66127e-12	MIC not significant	FALSE	TRUE	FALSE	FALSE	FALSE	TRUE	FALSE	FALSE
pcodonTGTATG	1267	0.111536	0.00018073	0.538	0.501	0.539513	0.502549	151	0.39814	0.243507	1.31579e-05	0.999039	1.39174e-09	0.995306	1.21287e-10	MIC not significant	FALSE	TRUE	FALSE	FALSE	FALSE	TRUE	FALSE	FALSE
pcodonTGTACT	1267	0.107033	0.000786773	0.501	0.502	0.529168	0.528111	67	0.442156	0.210864	0.007	0.781	0.00070534	0.773687	9.28174e-05	MIC not significant	FALSE	TRUE	FALSE	FALSE	FALSE	TRUE	FALSE	FALSE
pcodonTGTACC	1267	0.113862	0.0046302	0.151	0.332	0.13808	0.325757	47	0.379918	0.213831	0.126	0.99	0.115857	0.985222	0.00120092	MIC not significant	FALSE	FALSE	FALSE	FALSE	FALSE	FALSE	FALSE	FALSE
pcodonTGTACG	1267	0.0976896	1.7483e-06	0.961	0.948	0.944503	0.932666	53	0.760322	0.473577	0	0.295723	1.25308e-19	0.331885	1.24076e-08	MIC not significant	FALSE	TRUE	FALSE	FALSE	FALSE	TRUE	FALSE	FALSE
pcodonTGTAAC	1267	0.108807	0.00917972	0.382	0.917	0.405176	0.909905	41	0.492787	0.364193	0.002	0.994	0.000178496	0.985563	4.25675e-05	MIC not significant	FALSE	TRUE	FALSE	FALSE	FALSE	TRUE	FALSE	FALSE
pcodonTGTAAG	1267	0.111662	0.00300687	0.317	0.425	0.322645	0.445372	75	0.426551	0.310748	0.00125	0.999776	2.94234e-05	0.998905	2.04815e-07	MIC not significant	FALSE	TRUE	FALSE	FALSE	FALSE	TRUE	FALSE	FALSE
pcodonTGTAGT	1267	0.111028	0.000777167	0.271	0.259	0.277489	0.269366	54	0.502972	0.21989	0.000973684	0.292737	9.0498e-06	0.329886	0.000348164	MIC not significant	FALSE	TRUE	FALSE	FALSE	FALSE	TRUE	FALSE	FALSE
pcodonTGTAGA	1267	0.117282	0.000299401	0.062	0.051	0.04875	0.0371014	44	0.622361	0.390851	1.31579e-05	0.505079	9.17177e-11	0.551979	5.71034e-06	MIC not significant	FALSE	TRUE	FALSE	FALSE	FALSE	TRUE	FALSE	FALSE
pcodonTGTAGG	1267	0.103256	0.00392715	0.772	0.893	0.773663	0.888483	70	0.714286	0.614971	0	0.99998	2.19211e-23	0.99983	0	MIC not significant	FALSE	TRUE	FALSE	FALSE	FALSE	TRUE	FALSE	FALSE
pcodonTGTGTC	1267	0.101575	0.00238112	0.841	0.898	0.840528	0.895305	61	0.446378	0.394118	0.00142574	0.99998	1.69707e-05	0.999966	6.12302e-08	MIC not significant	FALSE	TRUE	FALSE	FALSE	FALSE	TRUE	FALSE	FALSE
pcodonTGTGTG	1267	0.120767	0.000690752	0.064	0.063	0.0580456	0.0553673	97	0.361892	0.205533	0.006	0.996	0.000568014	0.978762	3.11325e-06	MIC not significant	FALSE	TRUE	FALSE	FALSE	FALSE	TRUE	FALSE	FALSE
pcodonTGTGCT	1267	0.113752	0.00242577	0.31	0.395	0.314943	0.398083	107	0.448356	0.299543	1.31579e-05	0.999684	5.76001e-09	0.996944	1.06067e-09	MIC not significant	FALSE	TRUE	FALSE	FALSE	FALSE	TRUE	FALSE	FALSE
pcodonTGTGCC	1267	0.109263	0.004077	0.402	0.587	0.417579	0.616233	66	0.479061	0.270458	0.00109211	0.926118	1.94004e-05	0.902774	7.62877e-06	MIC not significant	FALSE	TRUE	FALSE	FALSE	FALSE	TRUE	FALSE	FALSE
pcodonTGTGCA	1267	0.101141	3.392e-05	0.861	0.827	0.853928	0.824896	48	0.66215	0.475784	3.94737e-05	0.980382	4.33943e-10	0.957597	5.87154e-08	MIC not significant	FALSE	TRUE	FALSE	FALSE	FALSE	TRUE	FALSE	FALSE
pcodonTGTGCG	1267	0.136198	0.0176158	0.002	0.079	8.29854e-05	0.0911734	111	0.386628	0.276733	0.000633663	1	1.05751e-05	0.999933	3.04282e-09	Monotone	TRUE	TRUE	FALSE	TRUE	TRUE	TRUE	FALSE	TRUE
pcodonTGTGAA	1267	0.109728	0.000354633	0.31	0.286	0.339889	0.310687	43	0.574438	0.516479	0.000302632	0.999842	5.4903e-08	0.999559	2.65774e-07	MIC not significant	FALSE	TRUE	FALSE	FALSE	FALSE	TRUE	FALSE	FALSE
pcodonTGTGGT	1267	0.122559	0.00662308	0.055	0.211	0.0506294	0.203486	117	0.348172	0.197825	0.001	0.999	0.000168714	0.992494	5.0586e-07	MIC not significant	FALSE	TRUE	FALSE	FALSE	FALSE	TRUE	FALSE	FALSE
pcodonTGTGGC	1267	0.113295	0.00657255	0.224	0.564	0.232491	0.562402	81	0.304864	0.24894	0.0701188	1	0.0566611	0.999996	2.94452e-06	MIC not significant	FALSE	FALSE	FALSE	FALSE	FALSE	FALSE	FALSE	FALSE
pcodonTGTGGA	1267	0.108506	0.00185792	0.635	0.692	0.648673	0.703652	118	0.473922	0.389945	0	1	1.49625e-14	0.999996	4.15996e-14	MIC not significant	FALSE	TRUE	FALSE	FALSE	FALSE	TRUE	FALSE	FALSE
pcodonTGTGGG	1267	0.11902	0.0054224	0.119	0.288	0.118242	0.293215	110	0.47867	0.417001	0	1	3.35756e-12	1	2.59942e-14	MIC not significant	FALSE	TRUE	FALSE	FALSE	FALSE	TRUE	FALSE	FALSE
pcodonTGCTTT	1267	0.158845	0.0275673	0	0.0291485	1.16048e-08	0.0230278	303	0.349897	0.251108	0	1	8.86745e-21	1	1.14353e-20	Monotone	TRUE	TRUE	FALSE	TRUE	TRUE	TRUE	FALSE	TRUE
pcodonTGCTTC	1267	0.129437	0.02255	0.019	0.787	0.0167678	0.79694	177	0.386266	0.2187	0	0.990703	2.62464e-11	0.97855	5.28534e-11	Monotone	FALSE	TRUE	FALSE	FALSE	FALSE	TRUE	FALSE	FALSE
pcodonTGCTTA	1267	0.145142	0.0353276	0.001	0.796	5.94544e-05	0.801895	270	0.275536	0.125428	0.001	0.996	7.82553e-06	0.986373	2.12952e-09	Monotone	TRUE	TRUE	FALSE	TRUE	TRUE	TRUE	FALSE	TRUE
pcodonTGCTTG	1267	0.131972	0.0138052	0.019	0.32	0.0139274	0.326354	227	0.346735	0.309785	9.90099e-06	1	1.84421e-13	1	7.26791e-20	Monotone	FALSE	TRUE	FALSE	FALSE	TRUE	TRUE	FALSE	TRUE
pcodonTGCTCT	1267	0.114127	0.00837175	0.289	0.721	0.304301	0.719122	113	0.393281	0.312439	0.000326733	1	1.89597e-06	0.999999	1.24049e-10	MIC not significant	FALSE	TRUE	FALSE	FALSE	FALSE	TRUE	FALSE	FALSE
pcodonTGCTCC	1267	0.126323	0.0268127	0.016	0.915	0.0118523	0.917761	112	0.371198	0.268017	0.00141584	1	6.07665e-05	0.999967	5.05488e-09	Monotone	FALSE	TRUE	FALSE	FALSE	TRUE	TRUE	FALSE	TRUE
pcodonTGCTCG	1267	0.133946	0.0171835	0.004	0.196	0.00135679	0.206014	136	0.387068	0.306347	7.92079e-05	1	4.33896e-08	1	2.78001e-12	Monotone	TRUE	TRUE	FALSE	TRUE	TRUE	TRUE	FALSE	TRUE
pcodonTGCTAT	1267	0.117475	0.0208871	0.281	0.987	0.277088	0.980676	165	0.303318	0.209291	0.00342574	1	0.000415774	0.999998	6.51229e-10	MIC not significant	FALSE	TRUE	FALSE	FALSE	FALSE	TRUE	FALSE	FALSE
pcodonTGCTAC	1267	0.11336	0.00150201	0.19	0.211	0.183077	0.208692	52	0.431726	0.18515	0.013	0.656	0.00319658	0.674131	0.00159771	MIC not significant	FALSE	TRUE	FALSE	FALSE	FALSE	TRUE	FALSE	FALSE
pcodonTGCTAA	1267	0.109434	0.00224002	0.323	0.417	0.34904	0.445856	48	0.540461	0.285147	0.001	0.7	2.52119e-05	0.717493	9.2742e-05	MIC not significant	FALSE	TRUE	FALSE	FALSE	FALSE	TRUE	FALSE	FALSE
pcodonTGCTAG	1267	0.110255	0.00212896	0.453	0.525	0.471125	0.545875	100	0.421778	0.396757	7.92079e-05	1	2.93787e-08	1	2.2066e-12	MIC not significant	FALSE	TRUE	FALSE	FALSE	FALSE	TRUE	FALSE	FALSE
pcodonTGCTGT	1267	0.105972	0.0017106	0.662	0.71	0.682491	0.728074	86	0.423677	0.400018	0.00125743	1	3.91508e-05	1	6.4863e-11	MIC not significant	FALSE	TRUE	FALSE	FALSE	FALSE	TRUE	FALSE	FALSE
pcodonTGCTGC	1267	0.109876	0.00673745	0.587	0.874	0.600447	0.860477	139	0.354747	0.218447	0.000342105	0.999789	4.38373e-06	0.998459	6.61031e-09	MIC not significant	FALSE	TRUE	FALSE	FALSE	FALSE	TRUE	FALSE	FALSE
pcodonTGCTGA	1267	0.129609	0.0223583	0.005	0.663	0.00391973	0.675608	125	0.328104	0.212753	0.0144455	1	0.00572685	0.999968	6.1795e-08	Monotone	TRUE	TRUE	FALSE	TRUE	TRUE	TRUE	FALSE	TRUE
pcodonTGCTGG	1267	0.15105	0.0373426	1.31579e-05	0.444316	2.21429e-07	0.462941	183	0.274726	0.0984796	0.019	0.959	0.00839086	0.939424	1.51909e-05	Monotone	TRUE	TRUE	FALSE	FALSE	TRUE	TRUE	FALSE	FALSE
pcodonTGCCTT	1267	0.139827	0.0193922	0.000355263	0.111934	7.38911e-05	0.10808	146	0.353937	0.216623	0.000118421	0.999711	3.46373e-07	0.996993	3.23519e-09	Monotone	TRUE	TRUE	FALSE	TRUE	TRUE	TRUE	FALSE	TRUE
pcodonTGCCTC	1267	0.122479	0.006573	0.005	0.061	0.00340174	0.0468126	43	0.580085	0.457901	0.00025	0.994987	2.76779e-08	0.984959	1.42234e-06	Monotone	TRUE	TRUE	FALSE	TRUE	TRUE	TRUE	FALSE	TRUE
pcodonTGCCTA	1267	0.114068	0.00785263	0.132	0.477	0.131887	0.517648	52	0.368568	0.180841	0.071	0.955	0.0608756	0.936376	0.00183138	MIC not significant	FALSE	FALSE	FALSE	FALSE	FALSE	FALSE	FALSE	FALSE
pcodonTGCCTG	1267	0.103967	0.000674261	0.693	0.683	0.691757	0.69058	59	0.377478	0.140925	0.018	0.508	0.00849343	0.542596	0.00339203	MIC not significant	FALSE	TRUE	FALSE	FALSE	FALSE	TRUE	FALSE	FALSE
pcodonTGCCCT	1267	0.113096	0.0198519	0.336	0.997	0.354883	0.99112	111	0.371987	0.260039	0.00168421	0.999987	6.99432e-05	0.999907	1.08665e-08	MIC not significant	FALSE	TRUE	FALSE	FALSE	FALSE	TRUE	FALSE	FALSE
pcodonTGCCCG	1267	0.129498	0.0266854	0.001	0.745	0.000460439	0.746378	67	0.40667	0.326837	0.0120526	0.999987	0.00316581	0.999969	4.34589e-07	Monotone	TRUE	TRUE	FALSE	TRUE	TRUE	TRUE	FALSE	TRUE
pcodonTGCCGT	1267	0.10959	0.00375694	0.337	0.529	0.366243	0.559896	51	0.591988	0.337345	0.000223684	0.599526	3.11414e-08	0.63228	1.17075e-05	MIC not significant	FALSE	TRUE	FALSE	FALSE	FALSE	TRUE	FALSE	FALSE
pcodonTGCCGA	1267	0.11058	0.00655113	0.272	0.652	0.278216	0.672917	51	0.292199	0.0997531	0.463	0.959	0.509227	0.933645	0.0243806	MIC not significant	FALSE	FALSE	FALSE	FALSE	FALSE	FALSE	FALSE	FALSE
pcodonTGCCGG	1267	0.116176	0.0127683	0.083	0.685	0.0807384	0.710885	56	0.306547	0.0641015	0.229	0.567	0.240739	0.58952	0.0597389	MIC not significant	FALSE	FALSE	FALSE	FALSE	FALSE	FALSE	FALSE	FALSE
pcodonTGCATT	1267	0.147652	0.0290488	6.57895e-05	0.279237	6.0303e-06	0.287298	221	0.296466	0.208892	0.000257426	1	2.82812e-06	1	8.33563e-13	Monotone	TRUE	TRUE	FALSE	TRUE	TRUE	TRUE	FALSE	TRUE
pcodonTGCATC	1267	0.143139	0.0219686	5.26316e-05	0.0629211	2.72975e-06	0.0554905	114	0.284014	0.110605	0.092	0.98	0.0826713	0.958275	0.000300048	MIC not significant	TRUE	FALSE	FALSE	FALSE	TRUE	FALSE	FALSE	FALSE
pcodonTGCATA	1267	0.111338	0.00617675	0.382	0.697	0.383068	0.697536	92	0.309374	0.245493	0.071505	1	0.0597567	0.999999	5.12813e-07	MIC not significant	FALSE	FALSE	FALSE	FALSE	FALSE	FALSE	FALSE	FALSE
pcodonTGCATG	1267	0.13457	0.0152329	0.011	0.228	0.00460151	0.238974	207	0.332026	0.237656	1.9802e-05	1	4.41854e-08	1	9.36584e-14	Monotone	TRUE	TRUE	FALSE	TRUE	TRUE	TRUE	FALSE	TRUE
pcodonTGCACT	1267	0.122922	0.0092219	0.02	0.165	0.0137913	0.172415	68	0.373003	0.302596	0.0342871	1	0.0191082	0.999989	1.17871e-06	Monotone	FALSE	TRUE	FALSE	FALSE	TRUE	TRUE	FALSE	TRUE
pcodonTGCACC	1267	0.108613	0.00344095	0.391	0.579	0.423064	0.601897	55	0.372667	0.141552	0.041	0.674	0.0258323	0.693721	0.00464085	MIC not significant	FALSE	FALSE	FALSE	FALSE	FALSE	TRUE	FALSE	FALSE
pcodonTGCACG	1267	0.148788	0.0338295	0	0.151129	2.34336e-09	0.151155	83	0.351602	0.15407	0.054	0.961	0.0339165	0.936898	0.000242339	MIC not significant	TRUE	FALSE	FALSE	FALSE	TRUE	TRUE	FALSE	FALSE
pcodonTGCAAC	1267	0.10741	0.00368833	0.464	0.656	0.501528	0.681839	49	0.528402	0.39318	0.002	0.998	3.73166e-05	0.994305	2.55528e-06	MIC not significant	FALSE	TRUE	FALSE	FALSE	FALSE	TRUE	FALSE	FALSE
pcodonTGCAAG	1267	0.15526	0.0532854	0	0.927495	3.57255e-09	0.919623	161	0.291069	0.149527	0.0112368	0.999908	0.00403853	0.997798	4.04575e-07	Monotone	TRUE	TRUE	FALSE	TRUE	TRUE	TRUE	FALSE	TRUE
pcodonTGCAGT	1267	0.106592	0.00220667	0.497	0.588	0.525683	0.63115	41	0.502243	0.288672	0.00332895	0.741947	0.000100609	0.747408	0.000359916	MIC not significant	FALSE	TRUE	FALSE	FALSE	FALSE	TRUE	FALSE	FALSE
pcodonTGCAGC	1267	0.129879	0.0188643	0.000671053	0.224803	0.00010225	0.235282	51	0.300219	0.0783493	0.43	0.849	0.46419	0.836316	0.0470033	MIC not significant	TRUE	FALSE	FALSE	FALSE	TRUE	FALSE	FALSE	FALSE
pcodonTGCAGA	1267	0.125653	0.00414637	0.007	0.021	0.00230944	0.00970366	54	0.406882	0.338038	0.0201188	0.99999	0.0070795	0.999902	4.02224e-06	Monotone	TRUE	TRUE	FALSE	TRUE	TRUE	TRUE	FALSE	TRUE
pcodonTGCAGG	1267	0.117408	0.0117123	0.13	0.676	0.134574	0.684734	103	0.378167	0.192333	0.003	0.98	0.000381106	0.967269	3.5949e-06	MIC not significant	FALSE	TRUE	FALSE	FALSE	FALSE	TRUE	FALSE	FALSE
pcodonTGCGTC	1267	0.114894	0.012451	0.2	0.796	0.201317	0.793859	85	0.317088	0.129803	0.12	0.983	0.1179	0.957592	0.000706748	MIC not significant	FALSE	FALSE	FALSE	FALSE	FALSE	FALSE	FALSE	FALSE
pcodonTGCGTG	1267	0.115824	0.00634341	0.134	0.381	0.129914	0.389094	75	0.439115	0.311387	0.000644737	0.999382	6.57318e-06	0.997297	1.97808e-07	MIC not significant	FALSE	TRUE	FALSE	FALSE	FALSE	TRUE	FALSE	FALSE
pcodonTGCGCT	1267	0.102387	0.0061602	0.812	0.972	0.812534	0.963107	60	0.364474	0.297129	0.0281053	0.999974	0.0125485	0.999886	9.50223e-06	MIC not significant	FALSE	TRUE	FALSE	FALSE	FALSE	TRUE	FALSE	FALSE
pcodonTGCGCC	1267	0.122451	0.0180678	0.026	0.672	0.0156177	0.686506	71	0.3718	0.15035	0.024	0.791	0.0104969	0.784482	0.000834834	non-significant monotone/non-monotone	FALSE	TRUE	FALSE	FALSE	FALSE	TRUE	FALSE	FALSE
pcodonTGCGCG	1267	0.12261	0.0282182	0.05	0.985	0.0482483	0.98508	115	0.344111	0.235114	0.00382895	0.999987	0.000521409	0.99992	3.98537e-08	Monotone	FALSE	TRUE	FALSE	FALSE	FALSE	TRUE	FALSE	FALSE
pcodonTGCGAA	1267	0.105439	0.00172709	0.622	0.681	0.639354	0.69672	49	0.381255	0.20196	0.092	0.983	0.0882681	0.961585	0.00119831	MIC not significant	FALSE	FALSE	FALSE	FALSE	FALSE	FALSE	FALSE	FALSE
pcodonTGCGAG	1267	0.125304	0.0193862	0.005	0.495	0.00224889	0.544701	51	0.228671	0.0677238	0.905	0.986	0.881071	0.980859	0.0651369	MIC not significant	TRUE	FALSE	FALSE	FALSE	TRUE	FALSE	FALSE	FALSE
pcodonTGCGGT	1267	0.124598	0.0139263	0.026	0.482	0.0308711	0.490756	123	0.371007	0.273557	0.000263158	0.999987	9.81724e-07	0.999967	5.43136e-10	Monotone	FALSE	TRUE	FALSE	FALSE	FALSE	TRUE	FALSE	FALSE
pcodonTGCGGC	1267	0.125824	0.0168952	0.014	0.471	0.00936278	0.482757	98	0.459186	0.28504	0	0.966921	2.98843e-10	0.945363	1.50405e-08	Monotone	FALSE	TRUE	FALSE	FALSE	TRUE	TRUE	FALSE	FALSE
pcodonTGCGGA	1267	0.117061	0.0175074	0.24	0.957	0.266465	0.949296	148	0.344835	0.19869	0.00132895	0.999895	6.32514e-05	0.998521	1.36844e-08	MIC not significant	FALSE	TRUE	FALSE	FALSE	FALSE	TRUE	FALSE	FALSE
pcodonTGCGGG	1267	0.114576	0.00724049	0.238	0.571	0.260258	0.593185	104	0.46089	0.304387	3.94737e-05	0.999382	5.22303e-09	0.99553	1.27801e-09	MIC not significant	FALSE	TRUE	FALSE	FALSE	FALSE	TRUE	FALSE	FALSE
pcodonTGATTT	1267	0.135956	0.0103089	0.01	0.101	0.00436894	0.0889554	259	0.361897	0.260689	0	1	1.49381e-16	1	1.34316e-18	Monotone	TRUE	TRUE	FALSE	TRUE	TRUE	TRUE	FALSE	TRUE
pcodonTGATTC	1267	0.107362	0.00495795	0.733	0.908	0.744907	0.898525	143	0.400055	0.293576	0	1	8.64811e-11	0.999961	2.78488e-12	MIC not significant	FALSE	TRUE	FALSE	FALSE	FALSE	TRUE	FALSE	FALSE
pcodonTGATTA	1267	0.126358	0.015797	0.064	0.653	0.055629	0.669753	194	0.289374	0.240222	0.00205941	1	0.000172545	1	4.05975e-13	MIC not significant	FALSE	TRUE	FALSE	FALSE	FALSE	TRUE	FALSE	FALSE
pcodonTGATTG	1267	0.127334	0.0163722	0.034	0.633	0.0333072	0.632325	194	0.377508	0.315803	0	1	4.36745e-14	1	1.52285e-17	Monotone	FALSE	TRUE	FALSE	FALSE	FALSE	TRUE	FALSE	FALSE
pcodonTGATCT	1267	0.123776	0.00135965	0.035	0.042	0.0301009	0.0338674	112	0.524737	0.474809	0	1	9.60419e-18	1	4.52105e-17	Monotone	FALSE	TRUE	FALSE	FALSE	FALSE	TRUE	FALSE	FALSE
pcodonTGATCC	1267	0.109435	0.00458894	0.488	0.719	0.511885	0.720284	99	0.461306	0.278955	1.31579e-05	0.926184	9.41846e-11	0.906196	1.92818e-08	MIC not significant	FALSE	TRUE	FALSE	FALSE	FALSE	TRUE	FALSE	FALSE
pcodonTGATCA	1267	0.11163	0.00499391	0.249	0.489	0.265961	0.51764	56	0.47803	0.407368	0.00152475	1	2.20321e-05	0.999872	1.21137e-07	MIC not significant	FALSE	TRUE	FALSE	FALSE	FALSE	TRUE	FALSE	FALSE
pcodonTGATCG	1267	0.143904	0.0258962	0.000171053	0.192421	8.90926e-06	0.197086	155	0.375052	0.351559	1.9802e-05	1	2.89269e-08	1	4.35453e-16	Monotone	TRUE	TRUE	FALSE	TRUE	TRUE	TRUE	FALSE	TRUE
pcodonTGATAT	1267	0.108257	0.00631953	0.71	0.907	0.708219	0.908231	148	0.365339	0.23682	0.000302632	0.999987	2.51038e-06	0.999851	3.58585e-10	MIC not significant	FALSE	TRUE	FALSE	FALSE	FALSE	TRUE	FALSE	FALSE
pcodonTGATAC	1267	0.112658	4.8063e-05	0.264	0.223	0.263126	0.226543	82	0.442162	0.336465	0.00126733	1	2.82277e-05	0.999936	1.12258e-08	MIC not significant	FALSE	TRUE	FALSE	FALSE	FALSE	TRUE	FALSE	FALSE
pcodonTGATAA	1267	0.111914	0.00116708	0.212	0.231	0.232281	0.250379	52	0.43864	0.277685	0.018	0.993	0.00390046	0.976767	5.98534e-05	MIC not significant	FALSE	TRUE	FALSE	FALSE	FALSE	TRUE	FALSE	FALSE
pcodonTGATAG	1267	0.119158	0.00315195	0.15	0.218	0.138872	0.224129	127	0.410074	0.341326	5.94059e-05	1	3.92572e-08	1	5.57922e-13	MIC not significant	FALSE	TRUE	FALSE	FALSE	FALSE	TRUE	FALSE	FALSE
pcodonTGATGT	1267	0.107685	0.00372678	0.489	0.676	0.524174	0.692305	75	0.484993	0.386419	0.000157895	0.999947	3.27647e-08	0.999765	2.65353e-09	MIC not significant	FALSE	TRUE	FALSE	FALSE	FALSE	TRUE	FALSE	FALSE
pcodonTGATGC	1267	0.106822	0.00839286	0.59	0.929	0.618609	0.918629	90	0.386406	0.251659	0.004	0.999	0.000342083	0.998266	4.73245e-07	MIC not significant	FALSE	TRUE	FALSE	FALSE	FALSE	TRUE	FALSE	FALSE
pcodonTGATGA	1267	0.12512	0.0145816	0.038	0.507	0.0305721	0.51624	132	0.387565	0.26703	0.000108911	1	2.53609e-07	0.999866	2.25349e-10	Monotone	FALSE	TRUE	FALSE	FALSE	FALSE	TRUE	FALSE	FALSE
pcodonTGATGG	1267	0.131054	0.011324	0.016	0.161	0.0081828	0.166106	172	0.365215	0.270003	0	1	1.26907e-10	0.999996	2.79328e-13	Monotone	FALSE	TRUE	FALSE	FALSE	TRUE	TRUE	FALSE	TRUE
pcodonTGACTT	1267	0.123884	0.0141085	0.062	0.603	0.0586586	0.622234	156	0.304832	0.175806	0.00810891	1	0.00219892	0.999716	5.09341e-08	MIC not significant	FALSE	TRUE	FALSE	FALSE	FALSE	TRUE	FALSE	FALSE
pcodonTGACTA	1267	0.112439	0.00417017	0.229	0.406	0.240411	0.431019	64	0.474489	0.389367	0.00190099	0.99999	8.23443e-05	0.999967	8.01527e-08	MIC not significant	FALSE	TRUE	FALSE	FALSE	FALSE	TRUE	FALSE	FALSE
pcodonTGACTG	1267	0.101029	0.004013	0.863	0.958	0.861054	0.946091	74	0.495509	0.42333	3.9604e-05	1	1.5027e-08	0.999983	3.50069e-10	MIC not significant	FALSE	TRUE	FALSE	FALSE	FALSE	TRUE	FALSE	FALSE
pcodonTGACCT	1267	0.139982	0.0130898	0.000118421	0.0135658	1.963e-05	0.00821428	116	0.376874	0.243005	0.001	0.998	2.54628e-06	0.99838	1.89258e-08	Monotone	TRUE	TRUE	FALSE	TRUE	TRUE	TRUE	FALSE	TRUE
pcodonTGACCC	1267	0.108236	0.00279407	0.395	0.532	0.426674	0.563301	46	0.535129	0.318883	0.000421053	0.561303	9.14291e-08	0.601322	4.35015e-05	MIC not significant	FALSE	TRUE	FALSE	FALSE	FALSE	TRUE	FALSE	FALSE
pcodonTGACCG	1267	0.114999	0.00464204	0.207	0.401	0.2109	0.405422	99	0.432148	0.296616	1.31579e-05	0.999421	1.16582e-08	0.996258	5.62751e-09	MIC not significant	FALSE	TRUE	FALSE	FALSE	FALSE	TRUE	FALSE	FALSE
pcodonTGACAG	1267	0.110176	0.00861037	0.326	0.837	0.334841	0.840967	40	0.41963	0.271578	0.042	0.987	0.0176323	0.960651	0.000564958	MIC not significant	FALSE	FALSE	FALSE	FALSE	FALSE	TRUE	FALSE	FALSE
pcodonTGACGT	1267	0.11181	0.00545024	0.371	0.651	0.382854	0.643529	105	0.360845	0.233648	0.00706579	0.999987	0.0014758	0.999686	1.76033e-07	MIC not significant	FALSE	TRUE	FALSE	FALSE	FALSE	TRUE	FALSE	FALSE
pcodonTGACGA	1267	0.122373	0.00910562	0.042	0.247	0.0298199	0.238657	88	0.312617	0.284805	0.0992871	1	0.092041	1	8.60572e-08	MIC not significant	FALSE	FALSE	FALSE	FALSE	FALSE	FALSE	FALSE	FALSE
pcodonTGACGG	1267	0.109462	0.00814531	0.552	0.873	0.550584	0.87384	107	0.341286	0.216966	0.0143564	0.99998	0.00517332	0.999736	4.28534e-07	MIC not significant	FALSE	TRUE	FALSE	FALSE	FALSE	TRUE	FALSE	FALSE
pcodonTGAATT	1267	0.132495	0.0105429	0.027	0.226	0.0227101	0.239427	292	0.304162	0.244623	0	1	5.4945e-10	1	2.01998e-19	Monotone	FALSE	TRUE	FALSE	FALSE	FALSE	TRUE	FALSE	FALSE
pcodonTGAATC	1267	0.115845	0.0031594	0.274	0.385	0.279506	0.401605	143	0.380877	0.256895	6.57895e-05	0.999974	5.02421e-09	0.999501	1.05279e-10	MIC not significant	FALSE	TRUE	FALSE	FALSE	FALSE	TRUE	FALSE	FALSE
pcodonTGAATA	1267	0.100994	0.00316977	0.884	0.944	0.885861	0.940244	101	0.317541	0.271402	0.0193861	1	0.00793208	1	2.33616e-08	MIC not significant	FALSE	TRUE	FALSE	FALSE	FALSE	TRUE	FALSE	FALSE
pcodonTGAATG	1267	0.133306	0.0196503	0.011	0.568	0.00811741	0.580093	253	0.340731	0.254531	0	1	4.75865e-15	1	9.6337e-18	Monotone	TRUE	TRUE	FALSE	TRUE	TRUE	TRUE	FALSE	TRUE
pcodonTGAACT	1267	0.111807	0.00183843	0.499	0.551	0.517413	0.575512	145	0.392259	0.297954	9.90099e-06	1	1.62519e-10	0.999993	1.24384e-12	MIC not significant	FALSE	TRUE	FALSE	FALSE	FALSE	TRUE	FALSE	FALSE
pcodonTGAACC	1267	0.120242	0.0220376	0.095	0.948	0.0871434	0.940244	109	0.354329	0.33271	0.00535644	1	0.000894851	1	5.2285e-11	MIC not significant	FALSE	TRUE	FALSE	FALSE	FALSE	TRUE	FALSE	FALSE
pcodonTGAACA	1267	0.114527	0.000930057	0.121	0.122	0.116858	0.114347	54	0.659942	0.482285	1.31579e-05	0.970684	1.39188e-13	0.946641	5.73204e-09	MIC not significant	FALSE	TRUE	FALSE	FALSE	FALSE	TRUE	FALSE	FALSE
pcodonTGAACG	1267	0.127546	0.00369746	0.037	0.076	0.031727	0.0718422	192	0.452453	0.410155	0	1	4.76364e-26	1	1.48747e-23	Monotone	FALSE	TRUE	FALSE	FALSE	FALSE	TRUE	FALSE	FALSE
pcodonTGAAAT	1267	0.114171	0.00509142	0.203	0.438	0.223343	0.44933	80	0.406987	0.251253	0.001	0.988987	2.09163e-05	0.971987	2.18071e-06	MIC not significant	FALSE	TRUE	FALSE	FALSE	FALSE	TRUE	FALSE	FALSE
pcodonTGAAAC	1267	0.109749	0.000318959	0.377	0.35	0.394966	0.364924	77	0.473865	0.393371	4.9505e-05	1	3.06701e-08	0.999957	1.03963e-09	MIC not significant	FALSE	TRUE	FALSE	FALSE	FALSE	TRUE	FALSE	FALSE
pcodonTGAAAA	1267	0.108001	0.000239415	0.466	0.421	0.487891	0.447296	44	0.476472	0.241546	0.001	0.461	7.54269e-05	0.516312	0.0008165	MIC not significant	FALSE	TRUE	FALSE	FALSE	FALSE	TRUE	FALSE	FALSE
pcodonTGAAAG	1267	0.136181	0.0264914	0.004	0.703	0.00236156	0.718401	206	0.363742	0.245311	0	0.99999	8.32048e-12	0.999966	3.78283e-14	Monotone	TRUE	TRUE	FALSE	TRUE	TRUE	TRUE	FALSE	TRUE
pcodonTGAAGT	1267	0.105652	0.00188466	0.665	0.701	0.675049	0.727446	85	0.370748	0.25306	0.0147105	0.999934	0.00504758	0.99973	9.26507e-07	MIC not significant	FALSE	TRUE	FALSE	FALSE	FALSE	TRUE	FALSE	FALSE
pcodonTGAAGC	1267	0.120631	0.00778854	0.054	0.247	0.0505465	0.258633	90	0.435652	0.309602	0.001	0.999	9.46106e-07	0.999097	1.23955e-08	MIC not significant	FALSE	TRUE	FALSE	FALSE	FALSE	TRUE	FALSE	FALSE
pcodonTGAAGA	1267	0.102987	0.00123073	0.76	0.776	0.769336	0.793504	71	0.4726	0.262846	0.002	0.84	2.92906e-06	0.830941	4.85392e-06	MIC not significant	FALSE	TRUE	FALSE	FALSE	FALSE	TRUE	FALSE	FALSE
pcodonTGAAGG	1267	0.128836	0.0170447	0.018	0.479	0.0152427	0.510196	159	0.385837	0.266308	0	0.99999	5.00934e-10	0.999894	3.35893e-12	Monotone	FALSE	TRUE	FALSE	FALSE	FALSE	TRUE	FALSE	FALSE
pcodonTGAGTC	1267	0.107391	0.00402499	0.538	0.716	0.555854	0.730342	75	0.425769	0.300026	0.00140789	0.999579	3.05702e-05	0.997625	3.65673e-07	MIC not significant	FALSE	TRUE	FALSE	FALSE	FALSE	TRUE	FALSE	FALSE
pcodonTGAGTG	1267	0.10176	1.34202e-05	0.869	0.842	0.863429	0.84014	93	0.547828	0.4223	0	0.999891	3.37093e-16	0.999059	1.81844e-12	MIC not significant	FALSE	TRUE	FALSE	FALSE	FALSE	TRUE	FALSE	FALSE
pcodonTGAGCT	1267	0.106601	0.000407445	0.827	0.814	0.828438	0.818692	173	0.328782	0.223535	0.000841584	1	2.90824e-05	0.999997	5.09573e-11	MIC not significant	FALSE	TRUE	FALSE	FALSE	FALSE	TRUE	FALSE	FALSE
pcodonTGAGCC	1267	0.132977	0.0123967	0.003	0.086	0.00129963	0.0779279	125	0.383255	0.304175	0.000513158	0.999987	8.22426e-06	1	2.63439e-11	Monotone	TRUE	TRUE	FALSE	TRUE	TRUE	TRUE	FALSE	TRUE
pcodonTGAGCA	1267	0.110691	3.88077e-05	0.32	0.283	0.326658	0.281828	68	0.657853	0.463156	0	0.954168	4.50293e-17	0.931015	1.72003e-10	MIC not significant	FALSE	TRUE	FALSE	FALSE	FALSE	TRUE	FALSE	FALSE
pcodonTGAGCG	1267	0.129069	0.0131259	0.043	0.388	0.0336227	0.422572	224	0.335685	0.21014	1.31579e-05	0.999974	1.81944e-11	0.999616	4.87611e-13	Monotone	FALSE	TRUE	FALSE	FALSE	FALSE	TRUE	FALSE	FALSE
pcodonTGAGAA	1267	0.112052	0.00716878	0.197	0.604	0.205253	0.627216	42	0.565472	0.357835	0.000394737	0.749882	2.93494e-07	0.753147	2.86631e-05	MIC not significant	FALSE	TRUE	FALSE	FALSE	FALSE	TRUE	FALSE	FALSE
pcodonTGAGGT	1267	0.125782	0.0158687	0.029	0.502	0.0169959	0.513328	113	0.47598	0.328065	0	0.999356	3.97762e-13	0.995593	3.38408e-11	Monotone	FALSE	TRUE	FALSE	FALSE	FALSE	TRUE	FALSE	FALSE
pcodonTGAGGC	1267	0.11719	0.0119723	0.112	0.628	0.101229	0.65166	79	0.273016	0.187554	0.229474	0.999987	0.254467	0.999914	6.70751e-05	MIC not significant	FALSE	FALSE	FALSE	FALSE	FALSE	FALSE	FALSE	FALSE
pcodonTGAGGA	1267	0.129477	0.011068	0.014	0.159	0.00643769	0.151476	147	0.424395	0.341979	0	1	1.33145e-14	0.999999	7.41931e-15	Monotone	FALSE	TRUE	FALSE	FALSE	TRUE	TRUE	FALSE	TRUE
pcodonTGAGGG	1267	0.116239	0.00330869	0.299	0.436	0.315554	0.444709	150	0.342123	0.214783	0.00127632	0.999987	5.90036e-05	0.999841	2.34055e-09	MIC not significant	FALSE	TRUE	FALSE	FALSE	FALSE	TRUE	FALSE	FALSE
pcodonTGGTTT	1267	0.124595	0.00798577	0.138	0.435	0.131454	0.443503	264	0.339361	0.229363	0	1	9.00711e-14	0.999997	1.52774e-16	MIC not significant	FALSE	TRUE	FALSE	FALSE	FALSE	TRUE	FALSE	FALSE
pcodonTGGTTC	1267	0.112445	0.0152579	0.528	0.982	0.550262	0.979449	162	0.304214	0.193236	0.00445545	1	0.000714	0.999972	4.84549e-09	MIC not significant	FALSE	TRUE	FALSE	FALSE	FALSE	TRUE	FALSE	FALSE
pcodonTGGTTA	1267	0.150854	0.0169692	1.31579e-05	0.00632895	4.99867e-07	0.00328459	204	0.33806	0.269975	3.9604e-05	1	3.74013e-08	1	1.67724e-15	Monotone	TRUE	TRUE	FALSE	TRUE	TRUE	TRUE	FALSE	TRUE
pcodonTGGTTG	1267	0.12528	0.00616143	0.076	0.222	0.0679178	0.229106	195	0.349636	0.278409	0	1	1.79544e-10	1	2.2687e-15	MIC not significant	FALSE	TRUE	FALSE	FALSE	FALSE	TRUE	FALSE	FALSE
pcodonTGGTCT	1267	0.122201	0.0113756	0.069	0.463	0.0646479	0.464735	122	0.386973	0.278313	6.93069e-05	1	7.68145e-08	0.99986	4.27878e-10	MIC not significant	FALSE	TRUE	FALSE	FALSE	FALSE	TRUE	FALSE	FALSE
pcodonTGGTCC	1267	0.124857	0.00955037	0.036	0.244	0.0292291	0.259983	126	0.430784	0.27814	1.31579e-05	0.999592	1.4383e-09	0.997097	2.22727e-10	Monotone	FALSE	TRUE	FALSE	FALSE	FALSE	TRUE	FALSE	FALSE
pcodonTGGTCA	1267	0.106123	0.00141231	0.559	0.61	0.593257	0.6358	56	0.637931	0.454127	2.63158e-05	0.947908	2.29518e-13	0.921205	3.9329e-08	MIC not significant	FALSE	TRUE	FALSE	FALSE	FALSE	TRUE	FALSE	FALSE
pcodonTGGTCG	1267	0.120337	0.00673875	0.169	0.424	0.168388	0.438117	168	0.395589	0.315419	0	1	2.65993e-13	1	2.38023e-15	MIC not significant	FALSE	TRUE	FALSE	FALSE	FALSE	TRUE	FALSE	FALSE
pcodonTGGTAT	1267	0.115962	0.0124027	0.319	0.884	0.322902	0.873255	154	0.326024	0.246252	0.00220792	1	0.000191516	1	5.96458e-11	MIC not significant	FALSE	TRUE	FALSE	FALSE	FALSE	TRUE	FALSE	FALSE
pcodonTGGTAC	1267	0.11675	0.00207645	0.066	0.089	0.0539903	0.0803338	45	0.427074	0.36282	0.00871053	0.999763	0.00100216	0.999204	1.19914e-05	MIC not significant	FALSE	TRUE	FALSE	FALSE	FALSE	TRUE	FALSE	FALSE
pcodonTGGTAA	1267	0.106937	0.00158525	0.509	0.557	0.532683	0.585112	51	0.307045	0.212401	0.350171	0.999842	0.394247	0.999484	0.000665515	MIC not significant	FALSE	FALSE	FALSE	FALSE	FALSE	FALSE	FALSE	FALSE
pcodonTGGTAG	1267	0.102915	0.00305222	0.79	0.885	0.799719	0.883463	75	0.421745	0.314342	0.00151316	0.999868	4.63312e-05	0.999454	1.68332e-07	MIC not significant	FALSE	TRUE	FALSE	FALSE	FALSE	TRUE	FALSE	FALSE
pcodonTGGTGT	1267	0.0910517	0.000706411	0.998	0.999	0.995265	0.995024	94	0.510454	0.493992	0	1	3.33942e-13	1	2.8749e-15	MIC not significant	FALSE	TRUE	FALSE	FALSE	FALSE	TRUE	FALSE	FALSE
pcodonTGGTGC	1267	0.132842	0.0189431	0.008	0.357	0.00293344	0.386651	148	0.339753	0.258586	0.00153465	1	0.00012331	1	4.16022e-11	Monotone	TRUE	TRUE	FALSE	TRUE	TRUE	TRUE	FALSE	TRUE
pcodonTGGTGA	1267	0.128795	0.00816693	0.011	0.079	0.00677856	0.0770328	134	0.370553	0.237572	0.000197368	0.999961	2.1435e-06	0.99931	2.33454e-09	Monotone	TRUE	TRUE	FALSE	TRUE	TRUE	TRUE	FALSE	TRUE
pcodonTGGTGG	1267	0.149983	0.0275387	6.57895e-05	0.155368	1.84853e-06	0.156593	240	0.285077	0.206903	0.00060396	1	2.22872e-05	1	1.17077e-13	Monotone	TRUE	TRUE	FALSE	TRUE	TRUE	TRUE	FALSE	TRUE
pcodonTGGCTT	1267	0.133247	0.0178685	0.015	0.476	0.0086237	0.48002	241	0.333931	0.261085	9.90099e-06	1	2.26789e-11	1	1.97689e-17	Monotone	FALSE	TRUE	FALSE	FALSE	TRUE	TRUE	FALSE	TRUE
pcodonTGGCTC	1267	0.126103	0.00979526	0.012	0.132	0.00668015	0.120567	89	0.468007	0.407128	8.91089e-05	1	3.0223e-08	0.999999	1.74997e-11	Monotone	TRUE	TRUE	FALSE	TRUE	TRUE	TRUE	FALSE	TRUE
pcodonTGGCTA	1267	0.10522	0.00935223	0.734	0.979	0.736848	0.967964	97	0.388287	0.334621	0.0010396	1	2.00438e-05	1	5.45675e-10	MIC not significant	FALSE	TRUE	FALSE	FALSE	FALSE	TRUE	FALSE	FALSE
pcodonTGGCTG	1267	0.117945	0.015011	0.199	0.879	0.221148	0.877058	143	0.359021	0.299234	0.000148515	1	3.59844e-07	1	1.56534e-12	MIC not significant	FALSE	TRUE	FALSE	FALSE	FALSE	TRUE	FALSE	FALSE
pcodonTGGCCT	1267	0.15337	0.0378872	0	0.456663	2.05926e-07	0.47381	238	0.298286	0.187132	0.000168317	1	1.71046e-06	0.999992	2.84252e-12	Monotone	TRUE	TRUE	FALSE	TRUE	TRUE	TRUE	FALSE	TRUE
pcodonTGGCCC	1267	0.116128	0.00203215	0.069	0.091	0.0626983	0.091188	53	0.312251	0.254872	0.2575	0.999987	0.293161	0.999959	0.000115709	MIC not significant	FALSE	FALSE	FALSE	FALSE	FALSE	FALSE	FALSE	FALSE
pcodonTGGCCA	1267	0.113635	0.00328199	0.151	0.255	0.141955	0.260073	47	0.510324	0.303804	0.003	0.947	0.00038215	0.916825	5.94225e-05	MIC not significant	FALSE	TRUE	FALSE	FALSE	FALSE	TRUE	FALSE	FALSE
pcodonTGGCCG	1267	0.117799	0.0167024	0.271	0.964	0.282391	0.945281	166	0.367746	0.369421	1.9802e-05	1	1.14807e-09	1	3.8405e-18	MIC not significant	FALSE	TRUE	FALSE	FALSE	FALSE	TRUE	FALSE	FALSE
pcodonTGGCAG	1267	0.129596	0.0131666	0.003	0.084	0.000535156	0.0799949	68	0.432214	0.301319	0.00364474	0.999724	0.000334368	0.997971	1.25451e-06	Monotone	TRUE	TRUE	FALSE	TRUE	TRUE	TRUE	FALSE	TRUE
pcodonTGGCGT	1267	0.123647	0.0133573	0.032	0.444	0.0260311	0.457714	107	0.443763	0.313653	5.26316e-05	0.999974	1.39735e-08	0.99944	3.5659e-10	Monotone	FALSE	TRUE	FALSE	FALSE	FALSE	TRUE	FALSE	FALSE
pcodonTGGCGC	1267	0.113968	0.00638175	0.137	0.422	0.138674	0.443868	50	0.272335	0.212926	0.623974	0.999974	0.663515	0.999959	0.000743965	MIC not significant	FALSE	FALSE	FALSE	FALSE	FALSE	FALSE	FALSE	FALSE
pcodonTGGCGA	1267	0.111606	0.0080427	0.313	0.74	0.324449	0.742705	81	0.442337	0.346505	0.000184211	0.999947	1.69502e-07	0.999716	7.48792e-09	MIC not significant	FALSE	TRUE	FALSE	FALSE	FALSE	TRUE	FALSE	FALSE
pcodonTGGCGG	1267	0.105926	0.00356888	0.727	0.845	0.747083	0.852652	112	0.550952	0.428823	0	1	6.45009e-21	0.999669	4.80271e-15	MIC not significant	FALSE	TRUE	FALSE	FALSE	FALSE	TRUE	FALSE	FALSE
pcodonTGGATT	1267	0.164193	0.0330436	0	0.0480693	7.79885e-10	0.0416007	417	0.291549	0.157173	0	0.996911	9.54987e-19	0.990091	3.80037e-17	Monotone	TRUE	TRUE	FALSE	TRUE	TRUE	TRUE	FALSE	TRUE
pcodonTGGATC	1267	0.130228	0.0110823	0.029	0.268	0.0245196	0.271041	227	0.302438	0.173038	7.89474e-05	0.999934	1.65801e-07	0.99906	6.52699e-11	Monotone	FALSE	TRUE	FALSE	FALSE	FALSE	TRUE	FALSE	FALSE
pcodonTGGATA	1267	0.116248	0.0160142	0.315	0.967	0.337002	0.956218	173	0.352825	0.174854	9.21053e-05	0.975816	4.47597e-07	0.958608	1.03679e-08	MIC not significant	FALSE	TRUE	FALSE	FALSE	FALSE	TRUE	FALSE	FALSE
pcodonTGGATG	1267	0.158161	0.0204173	2.63158e-05	0.00693421	6.04612e-08	0.00375402	385	0.261212	0.164371	0	1	9.20005e-10	1	1.15384e-16	Monotone	TRUE	TRUE	FALSE	TRUE	TRUE	TRUE	FALSE	TRUE
pcodonTGGACT	1267	0.135066	0.0203546	0.003	0.423	0.00165434	0.425347	182	0.430203	0.264622	0	0.98802	1.74748e-18	0.974177	1.10141e-13	Monotone	TRUE	TRUE	FALSE	TRUE	TRUE	TRUE	FALSE	TRUE
pcodonTGGACC	1267	0.151937	0.0409397	1.31579e-05	0.623947	2.04565e-07	0.638384	198	0.244256	0.131576	0.0525149	1	0.040016	0.99995	1.50651e-07	MIC not significant	TRUE	FALSE	FALSE	FALSE	TRUE	FALSE	FALSE	FALSE
pcodonTGGACA	1267	0.113007	0.00515169	0.26	0.483	0.267799	0.505817	87	0.491139	0.393352	2.9703e-05	1	3.83729e-09	0.999966	0	MIC not significant	FALSE	TRUE	FALSE	FALSE	FALSE	TRUE	FALSE	FALSE
pcodonTGGACG	1267	0.156675	0.0464838	9.90099e-06	0.784832	4.17088e-08	0.789174	282	0.248834	0.130871	0.00316832	1	0.000430631	0.999913	3.81658e-10	Monotone	TRUE	TRUE	FALSE	TRUE	TRUE	TRUE	FALSE	TRUE
pcodonTGGAAT	1267	0.110661	0.00372004	0.399	0.571	0.427631	0.595274	91	0.340625	0.310568	0.0243366	1	0.0119928	1	1.70035e-08	MIC not significant	FALSE	TRUE	FALSE	FALSE	FALSE	TRUE	FALSE	FALSE
pcodonTGGAAC	1267	0.116452	0.00736373	0.186	0.493	0.184309	0.510035	103	0.499753	0.337824	2.63158e-05	0.998816	1.37189e-11	0.993893	1.21792e-10	MIC not significant	FALSE	TRUE	FALSE	FALSE	FALSE	TRUE	FALSE	FALSE
pcodonTGGAAA	1267	0.120335	0.00664852	0.035	0.146	0.0269679	0.146942	65	0.614979	0.486044	1.31579e-05	0.999737	3.10675e-12	0.998536	1.10806e-10	Monotone	FALSE	TRUE	FALSE	FALSE	FALSE	TRUE	FALSE	FALSE
pcodonTGGAAG	1267	0.148328	0.0439744	7.89474e-05	0.947697	1.00118e-05	0.939125	269	0.316814	0.182979	0	0.99996	6.97837e-11	0.999162	2.15411e-13	Monotone	TRUE	TRUE	FALSE	TRUE	TRUE	TRUE	FALSE	TRUE
pcodonTGGAGT	1267	0.122982	0.00374545	0.063	0.133	0.0616208	0.124592	126	0.339223	0.273	0.00666337	1	0.00142822	1	3.48856e-10	MIC not significant	FALSE	TRUE	FALSE	FALSE	FALSE	TRUE	FALSE	FALSE
pcodonTGGAGC	1267	0.129727	0.0250157	0.02	0.859	0.0150969	0.857122	170	0.355963	0.290957	9.90099e-06	1	3.51431e-09	1	3.21533e-14	Monotone	FALSE	TRUE	FALSE	FALSE	FALSE	TRUE	FALSE	FALSE
pcodonTGGAGA	1267	0.117286	0.00881818	0.16	0.53	0.17174	0.55747	106	0.47255	0.239328	0	0.597228	2.21889e-10	0.626669	1.03029e-07	MIC not significant	FALSE	TRUE	FALSE	FALSE	FALSE	TRUE	FALSE	FALSE
pcodonTGGAGG	1267	0.13753	0.0303367	0.006	0.874	0.00354499	0.871044	263	0.352942	0.219289	0	0.99997	4.40602e-16	0.999401	9.70441e-16	Monotone	TRUE	TRUE	FALSE	TRUE	TRUE	TRUE	FALSE	TRUE
pcodonTGGGTC	1267	0.131832	0.0214232	0.003	0.475	0.00179334	0.475943	112	0.345171	0.180679	0.004	0.998	0.000642819	0.987692	2.99002e-06	Monotone	TRUE	TRUE	FALSE	TRUE	TRUE	TRUE	FALSE	TRUE
pcodonTGGGTG	1267	0.117933	0.00712624	0.23	0.514	0.229965	0.541986	140	0.425787	0.366467	0	1	1.22367e-12	1	2.32311e-15	MIC not significant	FALSE	TRUE	FALSE	FALSE	FALSE	TRUE	FALSE	FALSE
pcodonTGGGCT	1267	0.123379	0.010816	0.073	0.421	0.0655836	0.4372	143	0.430783	0.336895	0	1	4.33825e-14	0.999995	3.01004e-14	MIC not significant	FALSE	TRUE	FALSE	FALSE	FALSE	TRUE	FALSE	FALSE
pcodonTGGGCC	1267	0.124033	0.0201475	0.066	0.896	0.0576185	0.883724	159	0.339117	0.258718	0.00039604	1	6.36327e-06	1	7.6395e-12	MIC not significant	FALSE	TRUE	FALSE	FALSE	FALSE	TRUE	FALSE	FALSE
pcodonTGGGCA	1267	0.100666	0.000767944	0.864	0.871	0.863844	0.866396	52	0.355151	0.242501	0.105	0.999	0.11059	0.997916	0.000250209	MIC not significant	FALSE	FALSE	FALSE	FALSE	FALSE	FALSE	FALSE	FALSE
pcodonTGGGCG	1267	0.156607	0.0452656	1.31579e-05	0.698	2.42352e-08	0.707552	250	0.298786	0.152962	5.26316e-05	0.997263	4.49687e-08	0.990941	1.45472e-10	Monotone	TRUE	TRUE	FALSE	TRUE	TRUE	TRUE	FALSE	TRUE
pcodonTGGGAC	1267	0.113233	0.000452248	0.17	0.151	0.163824	0.143335	45	0.516062	0.369998	0.001	0.972	7.34863e-07	0.944563	9.31689e-06	MIC not significant	FALSE	TRUE	FALSE	FALSE	FALSE	TRUE	FALSE	FALSE
pcodonTGGGAA	1267	0.104416	0.00324422	0.718	0.838	0.719976	0.83055	75	0.313195	0.137374	0.095	0.972	0.079824	0.954418	0.00114387	MIC not significant	FALSE	FALSE	FALSE	FALSE	FALSE	FALSE	FALSE	FALSE
pcodonTGGGAG	1267	0.111172	0.00810065	0.317	0.744	0.340256	0.749875	78	0.327316	0.280748	0.0408614	1	0.0266947	0.999999	6.08351e-07	MIC not significant	FALSE	FALSE	FALSE	FALSE	FALSE	TRUE	FALSE	FALSE
pcodonTGGGGT	1267	0.126819	0.0151465	0.08	0.672	0.0789552	0.687322	239	0.372519	0.260214	0	1	2.87599e-17	0.99999	3.09375e-17	MIC not significant	FALSE	TRUE	FALSE	FALSE	FALSE	TRUE	FALSE	FALSE
pcodonTGGGGC	1267	0.141175	0.0234526	0.000394737	0.247171	0.000100267	0.257114	181	0.314112	0.160665	0.00118421	0.998974	4.88768e-05	0.993339	2.25128e-08	Monotone	TRUE	TRUE	FALSE	TRUE	TRUE	TRUE	FALSE	TRUE
pcodonTGGGGA	1267	0.140517	0.0231745	0.002	0.354	0.000300834	0.368882	237	0.305998	0.22843	7.92079e-05	1	3.05013e-07	1	6.26886e-15	Monotone	TRUE	TRUE	FALSE	TRUE	TRUE	TRUE	FALSE	TRUE
pcodonTGGGGG	1267	0.140497	0.0256968	0.000486842	0.342105	7.72866e-05	0.354963	161	0.406127	0.256313	0	0.999069	1.10708e-12	0.994557	7.31416e-12	Monotone	TRUE	TRUE	FALSE	TRUE	TRUE	TRUE	FALSE	TRUE
pcodonCTTTTT	1267	0.140235	0.0102346	0.001	0.037	0.000568513	0.0262358	299	0.336502	0.273421	0	1	2.60994e-17	1	2.20559e-22	Monotone	TRUE	TRUE	FALSE	TRUE	TRUE	TRUE	FALSE	TRUE
pcodonCTTTTC	1267	0.140319	0.0351502	0.001	0.872	0.000113648	0.864281	180	0.345941	0.208273	6.57895e-05	0.999947	1.44975e-07	0.999238	1.20587e-10	Monotone	TRUE	TRUE	FALSE	TRUE	TRUE	TRUE	FALSE	TRUE
pcodonCTTTTA	1267	0.139547	0.0341348	0.001	0.947	0.000923009	0.929782	282	0.32603	0.25925	0	1	1.28049e-14	1	5.25809e-20	Monotone	TRUE	TRUE	FALSE	TRUE	TRUE	TRUE	FALSE	TRUE
pcodonCTTTTG	1267	0.127004	0.00309221	0.077	0.119	0.0660412	0.117008	255	0.413662	0.296262	0	1	1.90748e-31	0.999894	4.5464e-21	MIC not significant	FALSE	TRUE	FALSE	FALSE	FALSE	TRUE	FALSE	FALSE
pcodonCTTTCT	1267	0.137374	0.0254402	0.001	0.44	0.00015651	0.460598	149	0.400858	0.251738	1.31579e-05	0.999763	2.18313e-09	0.997951	7.10787e-11	Monotone	TRUE	TRUE	FALSE	TRUE	TRUE	TRUE	FALSE	TRUE
pcodonCTTTCC	1267	0.126361	0.0104863	0.012	0.144	0.00671978	0.148384	96	0.322337	0.260412	0.027198	1	0.0136106	0.999999	1.08862e-07	Monotone	TRUE	TRUE	FALSE	TRUE	TRUE	TRUE	FALSE	TRUE
pcodonCTTTCA	1267	0.106329	0.00476431	0.564	0.793	0.587778	0.807056	58	0.495326	0.40691	0.000526316	0.999908	1.14575e-06	0.999477	7.21475e-08	MIC not significant	FALSE	TRUE	FALSE	FALSE	FALSE	TRUE	FALSE	FALSE
pcodonCTTTCG	1267	0.123506	0.0145228	0.073	0.646	0.0634037	0.666707	163	0.262087	0.152321	0.0650891	1	0.0534007	0.999977	2.60218e-07	MIC not significant	FALSE	FALSE	FALSE	FALSE	FALSE	FALSE	FALSE	FALSE
pcodonCTTTAT	1267	0.123224	0.0103549	0.137	0.552	0.138002	0.567771	215	0.348181	0.255862	0	1	2.05406e-11	1	2.28383e-15	MIC not significant	FALSE	TRUE	FALSE	FALSE	FALSE	TRUE	FALSE	FALSE
pcodonCTTTAC	1267	0.111835	0.00523034	0.245	0.498	0.260581	0.522793	66	0.354086	0.26518	0.0817624	1	0.0722012	0.999945	1.3052e-05	MIC not significant	FALSE	FALSE	FALSE	FALSE	FALSE	FALSE	FALSE	FALSE
pcodonCTTTAA	1267	0.112485	0.000816457	0.308	0.306	0.31688	0.315478	84	0.408179	0.288399	0.00355263	0.999947	0.000357854	0.999753	1.3914e-07	MIC not significant	FALSE	TRUE	FALSE	FALSE	FALSE	TRUE	FALSE	FALSE
pcodonCTTTAG	1267	0.108286	0.00327486	0.656	0.78	0.671468	0.787678	131	0.444864	0.359802	9.90099e-06	1	5.081e-12	0.999999	3.70972e-14	MIC not significant	FALSE	TRUE	FALSE	FALSE	FALSE	TRUE	FALSE	FALSE
pcodonCTTTGT	1267	0.111988	0.00679912	0.386	0.744	0.406192	0.734173	109	0.560206	0.415356	0	0.999673	2.17915e-20	0.997641	3.98353e-14	MIC not significant	FALSE	TRUE	FALSE	FALSE	FALSE	TRUE	FALSE	FALSE
pcodonCTTTGC	1267	0.143721	0.0256164	6.57895e-05	0.174947	7.21596e-06	0.176958	145	0.409176	0.207369	0	0.644792	3.19839e-12	0.667503	8.66868e-09	non-significant monotone/non-monotone	TRUE	TRUE	FALSE	FALSE	TRUE	TRUE	FALSE	FALSE
pcodonCTTTGA	1267	0.1261	0.0138795	0.056	0.545	0.0555478	0.556505	183	0.32505	0.217372	0.000267327	1	3.51257e-06	0.999991	2.90083e-11	MIC not significant	FALSE	TRUE	FALSE	FALSE	FALSE	TRUE	FALSE	FALSE
pcodonCTTTGG	1267	0.154115	0.0429629	0	0.692683	1.20131e-07	0.702909	242	0.30972	0.194856	1.9802e-05	1	2.59148e-08	0.999979	5.81029e-13	Monotone	TRUE	TRUE	FALSE	TRUE	TRUE	TRUE	FALSE	TRUE
pcodonCTTCTT	1267	0.144044	0.0372524	0.002	0.89	0.000101229	0.887168	260	0.304568	0.14204	6.57895e-05	0.982211	6.32313e-08	0.968819	3.36655e-10	Monotone	TRUE	TRUE	FALSE	TRUE	TRUE	TRUE	FALSE	TRUE
pcodonCTTCTC	1267	0.100379	0.00822824	0.885	0.995	0.877566	0.991042	64	0.331579	0.145728	0.186	0.981	0.207077	0.966935	0.00185478	MIC not significant	FALSE	FALSE	FALSE	FALSE	FALSE	FALSE	FALSE	FALSE
pcodonCTTCTA	1267	0.120622	0.00909723	0.146	0.516	0.156538	0.547212	169	0.328856	0.213293	0.000316832	1	1.95487e-06	0.999892	2.61116e-10	MIC not significant	FALSE	TRUE	FALSE	FALSE	FALSE	TRUE	FALSE	FALSE
pcodonCTTCTG	1267	0.124769	0.0181317	0.023	0.63	0.0166219	0.647873	105	0.333661	0.18761	0.0264737	0.999737	0.0141951	0.998242	3.92955e-06	Monotone	FALSE	TRUE	FALSE	FALSE	FALSE	TRUE	FALSE	FALSE
pcodonCTTCCT	1267	0.136158	0.0291724	0.004	0.739	0.00072762	0.75037	159	0.303439	0.104876	0.007	0.741	0.00172771	0.745287	3.12598e-05	non-significant monotone/non-monotone	TRUE	TRUE	FALSE	FALSE	TRUE	TRUE	FALSE	FALSE
pcodonCTTCCC	1267	0.11424	0.0146727	0.125	0.902	0.121942	0.890989	47	0.286967	0.11994	0.629	0.992	0.669115	0.98001	0.017548	MIC not significant	FALSE	FALSE	FALSE	FALSE	FALSE	FALSE	FALSE	FALSE
pcodonCTTCCG	1267	0.102418	0.0150601	0.899	1	0.894841	0.999469	124	0.372996	0.210332	0.002	0.999	7.14176e-05	0.993854	8.47708e-08	MIC not significant	FALSE	TRUE	FALSE	FALSE	FALSE	TRUE	FALSE	FALSE
pcodonCTTCAG	1267	0.112641	0.00838477	0.234	0.67	0.24072	0.679675	72	0.490752	0.21574	0.000144737	0.254421	9.10712e-08	0.280656	3.9559e-05	MIC not significant	FALSE	TRUE	FALSE	FALSE	FALSE	TRUE	FALSE	FALSE
pcodonCTTCGT	1267	0.116131	0.00637704	0.23	0.514	0.248553	0.532369	124	0.366722	0.320227	0.00163366	1	9.7276e-05	1	7.45071e-12	MIC not significant	FALSE	TRUE	FALSE	FALSE	FALSE	TRUE	FALSE	FALSE
pcodonCTTCGA	1267	0.122067	0.0089288	0.059	0.255	0.0427395	0.27423	100	0.541592	0.436292	0	0.99998	5.39802e-19	0.999778	7.61281e-14	MIC not significant	FALSE	TRUE	FALSE	FALSE	FALSE	TRUE	FALSE	FALSE
pcodonCTTCGG	1267	0.114346	0.00302365	0.155	0.227	0.149598	0.238799	70	0.560461	0.480991	2.9703e-05	1	6.12775e-11	0.999973	0	MIC not significant	FALSE	TRUE	FALSE	FALSE	FALSE	TRUE	FALSE	FALSE
pcodonCTTATT	1267	0.133552	0.0116779	0.042	0.296	0.0298699	0.299209	377	0.29625	0.174523	0	0.99999	3.06742e-16	0.99973	2.34746e-17	Monotone	FALSE	TRUE	FALSE	FALSE	FALSE	TRUE	FALSE	FALSE
pcodonCTTATC	1267	0.124061	0.010822	0.074	0.43	0.0655971	0.449862	165	0.459421	0.353075	0	1	9.68727e-22	0.999984	3.99163e-17	MIC not significant	FALSE	TRUE	FALSE	FALSE	FALSE	TRUE	FALSE	FALSE
pcodonCTTATA	1267	0.118747	0.00318544	0.237	0.35	0.248122	0.358713	178	0.331066	0.289512	0.000514851	1	6.07208e-06	1	9.52678e-15	MIC not significant	FALSE	TRUE	FALSE	FALSE	FALSE	TRUE	FALSE	FALSE
pcodonCTTATG	1267	0.139063	0.0233382	0.002	0.485	0.00160803	0.513907	297	0.31976	0.203757	0	1	2.09872e-13	0.999984	2.57519e-16	Monotone	TRUE	TRUE	FALSE	TRUE	TRUE	TRUE	FALSE	TRUE
pcodonCTTACT	1267	0.119432	0.020929	0.12	0.96	0.118483	0.950502	124	0.470779	0.323711	0	0.999901	1.30485e-12	0.998615	5.41799e-12	MIC not significant	FALSE	TRUE	FALSE	FALSE	FALSE	TRUE	FALSE	FALSE
pcodonCTTACC	1267	0.130455	0.019008	0.004	0.369	0.00193577	0.394851	109	0.401391	0.310647	0.000455446	1	3.88167e-06	0.999995	3.07814e-10	Monotone	TRUE	TRUE	FALSE	TRUE	TRUE	TRUE	FALSE	TRUE
pcodonCTTACA	1267	0.109859	0.00188936	0.302	0.365	0.325649	0.398644	43	0.435575	0.430528	0.0114455	1	0.00191721	0.999989	3.35796e-06	MIC not significant	FALSE	TRUE	FALSE	FALSE	FALSE	TRUE	FALSE	FALSE
pcodonCTTACG	1267	0.141796	0.0352735	0.002	0.815	9.69623e-05	0.819013	186	0.338203	0.242512	5.94059e-05	1	1.175e-07	0.999999	9.37901e-13	Monotone	TRUE	TRUE	FALSE	TRUE	TRUE	TRUE	FALSE	TRUE
pcodonCTTAAT	1267	0.110374	0.00020848	0.349	0.308	0.36395	0.327912	76	0.595845	0.455258	0	0.998703	1.29104e-16	0.99284	2.33996e-11	MIC not significant	FALSE	TRUE	FALSE	FALSE	FALSE	TRUE	FALSE	FALSE
pcodonCTTAAC	1267	0.118874	0.0172269	0.087	0.857	0.0828289	0.854764	96	0.336039	0.219477	0.0154342	0.999882	0.00550783	0.999522	1.48189e-06	MIC not significant	FALSE	TRUE	FALSE	FALSE	FALSE	TRUE	FALSE	FALSE
pcodonCTTAAA	1267	0.107996	0.0033609	0.423	0.608	0.4574	0.63426	45	0.487785	0.347463	0.001	0.99	1.38748e-05	0.964002	2.93495e-05	MIC not significant	FALSE	TRUE	FALSE	FALSE	FALSE	TRUE	FALSE	FALSE
pcodonCTTAAG	1267	0.148234	0.0258677	0.000105263	0.162053	6.81568e-06	0.163919	243	0.327944	0.191228	1.31579e-05	0.999882	6.21824e-11	0.998556	9.02546e-13	Monotone	TRUE	TRUE	FALSE	TRUE	TRUE	TRUE	FALSE	TRUE
pcodonCTTAGT	1267	0.106389	0.00315634	0.613	0.735	0.62479	0.74741	85	0.530912	0.453769	0	1	3.36137e-11	0.999997	1.61375e-12	MIC not significant	FALSE	TRUE	FALSE	FALSE	FALSE	TRUE	FALSE	FALSE
pcodonCTTAGC	1267	0.118031	0.0146993	0.141	0.835	0.147179	0.83967	117	0.526458	0.463613	0	1	2.98883e-20	1	3.00877e-17	MIC not significant	FALSE	TRUE	FALSE	FALSE	FALSE	TRUE	FALSE	FALSE
pcodonCTTAGA	1267	0.115009	0.00360757	0.212	0.345	0.223028	0.358021	105	0.42304	0.328457	0.000188119	1	8.34242e-07	0.999994	1.66894e-10	MIC not significant	FALSE	TRUE	FALSE	FALSE	FALSE	TRUE	FALSE	FALSE
pcodonCTTAGG	1267	0.121187	0.0144826	0.192	0.846	0.195102	0.845255	209	0.348654	0.255725	0	1	3.17608e-10	1	5.72949e-15	MIC not significant	FALSE	TRUE	FALSE	FALSE	FALSE	TRUE	FALSE	FALSE
pcodonCTTGTC	1267	0.129676	0.0196298	0.011	0.461	0.00510641	0.497838	118	0.430786	0.228548	0	0.748931	1.96115e-10	0.757724	4.38065e-08	non-significant monotone/non-monotone	TRUE	TRUE	FALSE	FALSE	TRUE	TRUE	FALSE	FALSE
pcodonCTTGTG	1267	0.113816	0.00613432	0.394	0.686	0.411822	0.694341	147	0.42603	0.268511	0	0.990703	1.04543e-14	0.977271	1.79214e-11	MIC not significant	FALSE	TRUE	FALSE	FALSE	FALSE	TRUE	FALSE	FALSE
pcodonCTTGCT	1267	0.11207	0.0122607	0.419	0.927	0.415592	0.925892	118	0.411207	0.352261	4.9505e-05	1	7.63067e-09	1	1.41256e-12	MIC not significant	FALSE	TRUE	FALSE	FALSE	FALSE	TRUE	FALSE	FALSE
pcodonCTTGCC	1267	0.133234	0.0208135	0.002	0.284	0.000276201	0.301671	93	0.409106	0.24864	0.001	0.999	2.29674e-06	0.986843	3.64236e-07	Monotone	TRUE	TRUE	FALSE	TRUE	TRUE	TRUE	FALSE	TRUE
pcodonCTTGCA	1267	0.10757	0.007205	0.5	0.854	0.522571	0.843895	67	0.305967	0.179648	0.232	0.999	0.265919	0.99876	0.000351387	MIC not significant	FALSE	FALSE	FALSE	FALSE	FALSE	FALSE	FALSE	FALSE
pcodonCTTGCG	1267	0.143709	0.0325895	0.000144737	0.52675	1.08129e-05	0.543765	157	0.3378	0.233767	0.000663366	1	1.72629e-05	0.999994	1.41587e-10	Monotone	TRUE	TRUE	FALSE	TRUE	TRUE	TRUE	FALSE	TRUE
pcodonCTTGAA	1267	0.112752	0.0064024	0.293	0.606	0.310037	0.616895	99	0.537028	0.404374	0	0.999663	8.15939e-18	0.997067	1.5277e-12	MIC not significant	FALSE	TRUE	FALSE	FALSE	FALSE	TRUE	FALSE	FALSE
pcodonCTTGAG	1267	0.108482	0.00220677	0.416	0.497	0.440319	0.534467	53	0.365601	0.29889	0.0726447	0.999987	0.0592126	0.999921	2.28198e-05	MIC not significant	FALSE	FALSE	FALSE	FALSE	FALSE	FALSE	FALSE	FALSE
pcodonCTTGGT	1267	0.119976	0.0120024	0.243	0.783	0.24878	0.794792	206	0.370894	0.268221	9.90099e-06	1	1.23963e-12	0.999999	1.56153e-15	MIC not significant	FALSE	TRUE	FALSE	FALSE	FALSE	TRUE	FALSE	FALSE
pcodonCTTGGC	1267	0.127968	0.0251002	0.014	0.855	0.0101289	0.862005	140	0.293472	0.207445	0.018703	1	0.00848794	0.999999	1.56553e-08	Monotone	FALSE	TRUE	FALSE	FALSE	TRUE	TRUE	FALSE	TRUE
pcodonCTTGGA	1267	0.152509	0.0415623	0	0.713802	4.37168e-07	0.72182	248	0.236343	0.11264	0.0297525	1	0.0188509	0.999765	6.07592e-08	Monotone	TRUE	TRUE	FALSE	TRUE	TRUE	TRUE	FALSE	TRUE
pcodonCTTGGG	1267	0.138103	0.0205845	0.00185526	0.289132	0.000687501	0.30045	198	0.33386	0.217602	9.90099e-06	1	3.19853e-09	0.999877	4.31292e-12	Monotone	TRUE	TRUE	FALSE	TRUE	TRUE	TRUE	FALSE	TRUE
pcodonCTCTTT	1267	0.106878	0.00186108	0.599	0.654	0.60205	0.664789	78	0.382254	0.405093	0.00477228	1	0.000522883	1	3.7807e-10	MIC not significant	FALSE	TRUE	FALSE	FALSE	FALSE	TRUE	FALSE	FALSE
pcodonCTCTTC	1267	0.114772	0.00107028	0.143	0.154	0.147845	0.157591	65	0.485147	0.308456	0.001	0.988	2.28583e-05	0.976148	1.57174e-06	MIC not significant	FALSE	TRUE	FALSE	FALSE	FALSE	TRUE	FALSE	FALSE
pcodonCTCTTA	1267	0.120946	0.0115439	0.043	0.392	0.0354737	0.408997	84	0.489933	0.315842	0.000118421	0.994395	3.42843e-08	0.983065	2.65961e-08	Monotone	FALSE	TRUE	FALSE	FALSE	FALSE	TRUE	FALSE	FALSE
pcodonCTCTTG	1267	0.119898	0.00150944	0.046	0.053	0.037798	0.0467147	68	0.502878	0.399076	0.000302632	0.999961	3.93347e-07	0.999733	7.61889e-09	Monotone	FALSE	TRUE	FALSE	FALSE	FALSE	TRUE	FALSE	FALSE
pcodonCTCTCG	1267	0.0996715	8.97507e-05	0.936	0.916	0.925257	0.910417	41	0.544368	0.519499	0.000947368	0.999974	4.64587e-06	0.999949	1.07039e-07	MIC not significant	FALSE	TRUE	FALSE	FALSE	FALSE	TRUE	FALSE	FALSE
pcodonCTCTAT	1267	0.103096	0.00325108	0.758	0.874	0.765794	0.871178	62	0.48842	0.324745	0.000171053	0.963092	1.14829e-07	0.936867	1.33594e-06	MIC not significant	FALSE	TRUE	FALSE	FALSE	FALSE	TRUE	FALSE	FALSE
pcodonCTCTGC	1267	0.111953	0.0129413	0.216	0.897	0.223387	0.905382	48	0.301804	0.14901	0.484	0.998	0.539012	0.988767	0.00707161	MIC not significant	FALSE	FALSE	FALSE	FALSE	FALSE	FALSE	FALSE	FALSE
pcodonCTCTGA	1267	0.106841	0.00589109	0.537	0.88	0.561005	0.863777	42	0.45702	0.284133	0.009	0.94	0.00106911	0.905285	0.000278604	MIC not significant	FALSE	TRUE	FALSE	FALSE	FALSE	TRUE	FALSE	FALSE
pcodonCTCTGG	1267	0.118572	0.0171925	0.06	0.824	0.0550887	0.833773	77	0.387549	0.214844	0.008	0.968	0.000598901	0.94484	2.18329e-05	MIC not significant	FALSE	TRUE	FALSE	FALSE	FALSE	TRUE	FALSE	FALSE
pcodonCTCCTT	1267	0.119498	0.00990251	0.038	0.327	0.0375616	0.342956	63	0.285671	0.121326	0.54	0.996	0.571373	0.990302	0.00514969	MIC not significant	FALSE	FALSE	FALSE	FALSE	FALSE	FALSE	FALSE	FALSE
pcodonCTCCTG	1267	0.114827	0.00971432	0.114	0.608	0.114062	0.627887	46	0.351089	0.167143	0.05	0.821	0.033157	0.819356	0.00478808	MIC not significant	FALSE	FALSE	FALSE	FALSE	FALSE	TRUE	FALSE	FALSE
pcodonCTCCCT	1267	0.11052	0.00362982	0.286	0.459	0.293709	0.476522	50	0.473862	0.189867	0.01	0.4	0.000994263	0.451721	0.00156216	MIC not significant	FALSE	TRUE	FALSE	FALSE	FALSE	TRUE	FALSE	FALSE
pcodonCTCATT	1267	0.120013	0.0103642	0.068	0.4	0.0527882	0.428263	95	0.361669	0.263881	0.00530693	1	0.000717811	0.999935	1.01617e-07	MIC not significant	FALSE	TRUE	FALSE	FALSE	FALSE	TRUE	FALSE	FALSE
pcodonCTCATC	1267	0.124508	0.00956424	0.01	0.082	0.00188637	0.0786601	48	0.518282	0.346509	0.003	0.991	0.000209802	0.972408	1.07933e-05	Monotone	TRUE	TRUE	FALSE	TRUE	TRUE	TRUE	FALSE	TRUE
pcodonCTCATG	1267	0.119363	0.0108637	0.072	0.458	0.0719962	0.49183	86	0.518842	0.383909	0	0.999881	1.05419e-10	0.998756	2.01237e-10	MIC not significant	FALSE	TRUE	FALSE	FALSE	FALSE	TRUE	FALSE	FALSE
pcodonCTCAAG	1267	0.118835	0.0111805	0.062	0.491	0.0577557	0.517218	80	0.348252	0.217094	0.012	0.997	0.0045359	0.994854	1.32757e-05	MIC not significant	FALSE	TRUE	FALSE	FALSE	FALSE	TRUE	FALSE	FALSE
pcodonCTCAGG	1267	0.102978	0.00726403	0.778	0.973	0.773653	0.96253	58	0.55925	0.467065	9.21053e-05	0.999921	9.02387e-10	0.999231	3.38792e-09	MIC not significant	FALSE	TRUE	FALSE	FALSE	FALSE	TRUE	FALSE	FALSE
pcodonCTCGTG	1267	0.108036	0.00271333	0.458	0.581	0.476261	0.606299	50	0.370838	0.156675	0.107	0.895	0.090203	0.868743	0.00470847	MIC not significant	FALSE	FALSE	FALSE	FALSE	FALSE	FALSE	FALSE	FALSE
pcodonCTCGCC	1267	0.105581	0.00776256	0.623	0.951	0.636658	0.94432	44	0.463121	0.396217	0.00436842	0.999829	0.000210995	0.999155	7.79159e-06	MIC not significant	FALSE	TRUE	FALSE	FALSE	FALSE	TRUE	FALSE	FALSE
pcodonCTCGCG	1267	0.114918	0.0101614	0.127	0.635	0.128423	0.641391	66	0.40652	0.264246	0.0146974	0.999408	0.00449673	0.996598	1.01121e-05	MIC not significant	FALSE	TRUE	FALSE	FALSE	FALSE	TRUE	FALSE	FALSE
pcodonCTCGGT	1267	0.111644	0.007002	0.244	0.619	0.245419	0.637164	53	0.528259	0.296227	0.000552632	0.721079	2.37026e-06	0.734717	3.40489e-05	MIC not significant	FALSE	TRUE	FALSE	FALSE	FALSE	TRUE	FALSE	FALSE
pcodonCTCGGC	1267	0.115185	0.0129031	0.086	0.787	0.0865584	0.790408	44	0.236023	0.145893	0.634645	0.999197	0.678337	0.996872	0.0109509	MIC not significant	FALSE	FALSE	FALSE	FALSE	FALSE	FALSE	FALSE	FALSE
pcodonCTCGGA	1267	0.114384	0.0117809	0.191	0.78	0.200008	0.781702	73	0.2748	0.192606	0.347316	0.999974	0.390027	0.999954	0.000102762	MIC not significant	FALSE	FALSE	FALSE	FALSE	FALSE	FALSE	FALSE	FALSE
pcodonCTCGGG	1267	0.1019	0.00532895	0.82	0.973	0.819076	0.955589	47	0.536599	0.330545	0.002	0.934	2.77965e-05	0.921162	3.32745e-05	MIC not significant	FALSE	TRUE	FALSE	FALSE	FALSE	TRUE	FALSE	FALSE
pcodonCTATTT	1267	0.116697	0.00380464	0.237	0.378	0.246107	0.384523	127	0.462957	0.236907	0	0.607614	1.01321e-12	0.634538	6.54671e-09	MIC not significant	FALSE	TRUE	FALSE	FALSE	FALSE	TRUE	FALSE	FALSE
pcodonCTATTC	1267	0.115795	0.00828042	0.148	0.493	0.134872	0.508995	82	0.45923	0.318952	0.000578947	0.999803	5.14997e-06	0.998662	3.26298e-08	MIC not significant	FALSE	TRUE	FALSE	FALSE	FALSE	TRUE	FALSE	FALSE
pcodonCTATTA	1267	0.106393	0.000630214	0.591	0.591	0.611336	0.603222	85	0.491628	0.379599	5.26316e-05	0.999987	1.57616e-08	0.999867	3.46219e-10	MIC not significant	FALSE	TRUE	FALSE	FALSE	FALSE	TRUE	FALSE	FALSE
pcodonCTATTG	1267	0.112947	0.00236934	0.335	0.424	0.35531	0.440725	108	0.376659	0.314605	0.0020396	1	0.000102468	1	2.72828e-10	MIC not significant	FALSE	TRUE	FALSE	FALSE	FALSE	TRUE	FALSE	FALSE
pcodonCTATCT	1267	0.11201	0.000563673	0.225	0.223	0.232673	0.219878	48	0.502676	0.264758	0.007	0.823	0.00050973	0.815658	0.00022431	MIC not significant	FALSE	TRUE	FALSE	FALSE	FALSE	TRUE	FALSE	FALSE
pcodonCTATCG	1267	0.110047	0.00233636	0.294	0.391	0.328749	0.424779	48	0.562354	0.510542	0.000907895	0.999987	5.5403e-06	0.999975	1.17313e-08	MIC not significant	FALSE	TRUE	FALSE	FALSE	FALSE	TRUE	FALSE	FALSE
pcodonCTATAT	1267	0.12286	0.0119637	0.021	0.267	0.0104807	0.27916	61	0.362047	0.231885	0.028	0.995	0.0114439	0.986151	0.000103917	Monotone	FALSE	TRUE	FALSE	FALSE	TRUE	TRUE	FALSE	TRUE
pcodonCTATGT	1267	0.116694	7.87196e-05	0.054	0.04	0.0465866	0.0341343	42	0.561261	0.401763	0.000434211	0.966092	4.52246e-07	0.937607	6.59779e-06	MIC not significant	FALSE	TRUE	FALSE	FALSE	FALSE	TRUE	FALSE	FALSE
pcodonCTATGC	1267	0.102503	0.00103332	0.816	0.834	0.817754	0.832118	40	0.487271	0.362255	0.006	0.994	0.000856826	0.98587	5.64944e-05	MIC not significant	FALSE	TRUE	FALSE	FALSE	FALSE	TRUE	FALSE	FALSE
pcodonCTATGA	1267	0.114665	0.0023121	0.123	0.178	0.131421	0.189069	54	0.47329	0.431061	0.0029703	1	0.000102072	0.999989	7.01827e-08	MIC not significant	FALSE	TRUE	FALSE	FALSE	FALSE	TRUE	FALSE	FALSE
pcodonCTATGG	1267	0.102453	0.00323181	0.804	0.89	0.808596	0.888334	91	0.457967	0.393771	6.93069e-05	1	3.62592e-08	0.999999	2.80974e-11	MIC not significant	FALSE	TRUE	FALSE	FALSE	FALSE	TRUE	FALSE	FALSE
pcodonCTACTT	1267	0.105077	0.00859027	0.891	0.992	0.888365	0.989476	178	0.305358	0.1381	0.002	0.99	0.000533553	0.977105	3.27023e-07	MIC not significant	FALSE	TRUE	FALSE	FALSE	FALSE	TRUE	FALSE	FALSE
pcodonCTACTA	1267	0.121249	0.00533884	0.067	0.167	0.0556623	0.170933	108	0.372475	0.216428	0.001	0.999	0.000151943	0.993985	3.91978e-07	MIC not significant	FALSE	TRUE	FALSE	FALSE	FALSE	TRUE	FALSE	FALSE
pcodonCTACTG	1267	0.117232	0.00736791	0.083	0.292	0.0707677	0.312963	58	0.491054	0.29807	0.001	0.887	1.82021e-06	0.871784	9.30685e-06	MIC not significant	FALSE	TRUE	FALSE	FALSE	FALSE	TRUE	FALSE	FALSE
pcodonCTACCT	1267	0.11357	0.00761391	0.16	0.521	0.159271	0.547473	55	0.521067	0.303146	0.001	0.751	5.43769e-07	0.765059	1.32914e-05	MIC not significant	FALSE	TRUE	FALSE	FALSE	FALSE	TRUE	FALSE	FALSE
pcodonCTACCG	1267	0.111048	0.00257007	0.237	0.346	0.250535	0.369247	40	0.804137	0.513925	0	0.25499	1.91985e-17	0.291447	6.83197e-07	MIC not significant	FALSE	TRUE	FALSE	FALSE	FALSE	TRUE	FALSE	FALSE
pcodonCTACGT	1267	0.105808	0.000857096	0.57	0.581	0.599505	0.607347	55	0.672489	0.498201	0	0.971881	2.99727e-15	0.947625	1.75979e-09	MIC not significant	FALSE	TRUE	FALSE	FALSE	FALSE	TRUE	FALSE	FALSE
pcodonCTACGA	1267	0.113069	0.0081197	0.149	0.569	0.149216	0.608276	44	0.368137	0.215427	0.045	0.973	0.0256731	0.943383	0.00150562	MIC not significant	FALSE	FALSE	FALSE	FALSE	FALSE	TRUE	FALSE	FALSE
pcodonCTACGG	1267	0.10021	0.00081199	0.909	0.912	0.89914	0.902362	52	0.593884	0.457998	0.000105263	0.998184	8.09795e-09	0.993224	3.63476e-08	MIC not significant	FALSE	TRUE	FALSE	FALSE	FALSE	TRUE	FALSE	FALSE
pcodonCTAATT	1267	0.11837	0.00715423	0.205	0.511	0.199464	0.514993	143	0.421841	0.318586	0	1	3.84e-13	0.999975	2.10942e-13	MIC not significant	FALSE	TRUE	FALSE	FALSE	FALSE	TRUE	FALSE	FALSE
pcodonCTAATC	1267	0.131681	0.010249	0.001	0.025	0.000284368	0.0200161	79	0.272459	0.121841	0.228	0.997	0.258457	0.977931	0.00161694	MIC not significant	TRUE	FALSE	FALSE	FALSE	TRUE	FALSE	FALSE	FALSE
pcodonCTAATA	1267	0.116299	0.00104788	0.124	0.129	0.119125	0.126066	78	0.314834	0.193007	0.0674737	0.999645	0.0536537	0.997881	5.72196e-05	MIC not significant	FALSE	FALSE	FALSE	FALSE	FALSE	FALSE	FALSE	FALSE
pcodonCTAATG	1267	0.122461	0.00465207	0.052	0.139	0.0515189	0.138302	124	0.482254	0.375082	0	1	8.59085e-14	0.99999	4.07729e-14	MIC not significant	FALSE	TRUE	FALSE	FALSE	FALSE	TRUE	FALSE	FALSE
pcodonCTAACT	1267	0.110294	0.00377006	0.324	0.511	0.344422	0.519904	68	0.556067	0.454039	3.94737e-05	0.999947	6.22003e-10	0.999817	3.02648e-10	MIC not significant	FALSE	TRUE	FALSE	FALSE	FALSE	TRUE	FALSE	FALSE
pcodonCTAACC	1267	0.117051	0.00901882	0.071	0.376	0.0623212	0.415525	50	0.435864	0.334735	0.0173816	0.999895	0.00581365	0.999223	1.07822e-05	MIC not significant	FALSE	TRUE	FALSE	FALSE	FALSE	TRUE	FALSE	FALSE
pcodonCTAACG	1267	0.109985	0.0137172	0.362	0.965	0.378158	0.952279	69	0.446209	0.275352	0.002	0.993	6.5508e-05	0.973616	3.68418e-06	MIC not significant	FALSE	TRUE	FALSE	FALSE	FALSE	TRUE	FALSE	FALSE
pcodonCTAAGG	1267	0.115912	0.00782352	0.118	0.413	0.11749	0.453193	68	0.395591	0.250654	0.015	0.998	0.00457026	0.996029	1.37439e-05	MIC not significant	FALSE	TRUE	FALSE	FALSE	FALSE	TRUE	FALSE	FALSE
pcodonCTAGTC	1267	0.115538	0.000396508	0.125	0.114	0.129621	0.116944	66	0.414474	0.266246	0.009	0.999	0.00179184	0.995006	9.23717e-06	MIC not significant	FALSE	TRUE	FALSE	FALSE	FALSE	TRUE	FALSE	FALSE
pcodonCTAGTG	1267	0.103641	0.000362624	0.796	0.78	0.803772	0.787727	97	0.509297	0.438904	0	1	2.51474e-14	0.999997	1.4604e-13	MIC not significant	FALSE	TRUE	FALSE	FALSE	FALSE	TRUE	FALSE	FALSE
pcodonCTAGCT	1267	0.104473	0.00386921	0.675	0.852	0.694465	0.851621	50	0.48537	0.203841	0.004	0.405	0.000218417	0.454609	0.000998317	MIC not significant	FALSE	TRUE	FALSE	FALSE	FALSE	TRUE	FALSE	FALSE
pcodonCTAGCG	1267	0.121261	0.0102223	0.032	0.275	0.0242479	0.293079	72	0.301636	0.328792	0.178079	1	0.190322	1	1.40544e-07	MIC not significant	FALSE	FALSE	FALSE	FALSE	FALSE	FALSE	FALSE	FALSE
pcodonCTAGGT	1267	0.111678	0.00409316	0.413	0.574	0.41965	0.60325	109	0.423107	0.307725	0.000118812	1	1.2837e-07	0.999896	3.87701e-10	MIC not significant	FALSE	TRUE	FALSE	FALSE	FALSE	TRUE	FALSE	FALSE
pcodonCTAGGC	1267	0.109485	0.00740818	0.39	0.789	0.421759	0.78223	70	0.470741	0.361219	0.000605263	0.999908	5.34162e-06	0.999578	7.59289e-08	MIC not significant	FALSE	TRUE	FALSE	FALSE	FALSE	TRUE	FALSE	FALSE
pcodonCTAGGA	1267	0.107752	0.00800901	0.565	0.893	0.578583	0.894055	95	0.43046	0.324102	0.000131579	0.999961	1.93419e-07	0.999837	1.74415e-09	MIC not significant	FALSE	TRUE	FALSE	FALSE	FALSE	TRUE	FALSE	FALSE
pcodonCTAGGG	1267	0.110145	0.00976826	0.443	0.884	0.466473	0.879812	96	0.376184	0.265754	0.00193421	0.999987	0.000101228	0.999707	7.67032e-08	MIC not significant	FALSE	TRUE	FALSE	FALSE	FALSE	TRUE	FALSE	FALSE
pcodonCTGTTT	1267	0.125152	0.00612962	0.026	0.08	0.0150884	0.0811197	105	0.309315	0.2331	0.0729703	1	0.0616728	0.999999	1.82824e-07	MIC not significant	FALSE	FALSE	FALSE	FALSE	FALSE	FALSE	FALSE	FALSE
pcodonCTGTTC	1267	0.115865	0.00433035	0.115	0.231	0.110507	0.246271	68	0.497202	0.358197	0.000236842	0.999513	8.30165e-07	0.996826	7.02939e-08	MIC not significant	FALSE	TRUE	FALSE	FALSE	FALSE	TRUE	FALSE	FALSE
pcodonCTGTTA	1267	0.103824	0.00466558	0.801	0.932	0.809711	0.924938	100	0.384965	0.29391	0.000693069	1	9.30691e-06	0.999957	5.69324e-09	MIC not significant	FALSE	TRUE	FALSE	FALSE	FALSE	TRUE	FALSE	FALSE
pcodonCTGTTG	1267	0.109807	0.00232445	0.501	0.589	0.520916	0.606383	103	0.568207	0.471611	0	1	2.79573e-18	0.999993	1.16536e-15	MIC not significant	FALSE	TRUE	FALSE	FALSE	FALSE	TRUE	FALSE	FALSE
pcodonCTGTCT	1267	0.104615	0.00493108	0.664	0.892	0.673618	0.874788	55	0.35306	0.317018	0.0760792	1	0.0638516	0.999993	7.64563e-06	MIC not significant	FALSE	FALSE	FALSE	FALSE	FALSE	FALSE	FALSE	FALSE
pcodonCTGTCC	1267	0.107001	0.00591928	0.494	0.827	0.531521	0.83134	43	0.348447	0.27808	0.0911842	0.999789	0.0799327	0.998998	0.000342088	MIC not significant	FALSE	FALSE	FALSE	FALSE	FALSE	FALSE	FALSE	FALSE
pcodonCTGTCG	1267	0.103062	0.00634633	0.763	0.967	0.773932	0.951729	61	0.392934	0.31037	0.00843421	0.999961	0.0013715	0.99954	3.11382e-06	MIC not significant	FALSE	TRUE	FALSE	FALSE	FALSE	TRUE	FALSE	FALSE
pcodonCTGTAT	1267	0.111523	0.000755606	0.307	0.304	0.320635	0.318027	74	0.622648	0.396233	0	0.665099	7.76318e-18	0.686176	2.61324e-09	MIC not significant	FALSE	TRUE	FALSE	FALSE	FALSE	TRUE	FALSE	FALSE
pcodonCTGTGT	1267	0.11239	0.00212397	0.205	0.278	0.224827	0.29468	49	0.519764	0.420777	0.00227632	0.999882	6.2154e-05	0.999391	9.71434e-07	MIC not significant	FALSE	TRUE	FALSE	FALSE	FALSE	TRUE	FALSE	FALSE
pcodonCTGTGC	1267	0.119184	0.0139725	0.057	0.623	0.0518529	0.647168	76	0.459254	0.358882	0.000223684	0.999987	3.87062e-07	0.999652	1.08493e-08	MIC not significant	FALSE	TRUE	FALSE	FALSE	FALSE	TRUE	FALSE	FALSE
pcodonCTGTGA	1267	0.11186	0.000898228	0.26	0.258	0.267551	0.269384	62	0.459254	0.452664	0.000683168	1	2.77174e-06	1	2.10229e-09	MIC not significant	FALSE	TRUE	FALSE	FALSE	FALSE	TRUE	FALSE	FALSE
pcodonCTGTGG	1267	0.10849	0.0193527	0.633	1	0.648558	0.998787	124	0.335619	0.225328	0.0109901	1	0.00332924	0.999985	2.54892e-08	MIC not significant	FALSE	TRUE	FALSE	FALSE	FALSE	TRUE	FALSE	FALSE
pcodonCTGCTT	1267	0.111143	0.0064967	0.479	0.778	0.496984	0.784024	114	0.399063	0.337833	0.000217822	1	5.69498e-07	1	1.19955e-11	MIC not significant	FALSE	TRUE	FALSE	FALSE	FALSE	TRUE	FALSE	FALSE
pcodonCTGCTC	1267	0.100196	0.00158742	0.933	0.958	0.913934	0.938884	42	0.586342	0.423696	0.000236842	0.962487	4.82494e-08	0.932823	5.42643e-06	MIC not significant	FALSE	TRUE	FALSE	FALSE	FALSE	TRUE	FALSE	FALSE
pcodonCTGCTG	1267	0.108399	0.0127874	0.476	0.975	0.496161	0.961813	72	0.471407	0.321312	0.000368421	0.997855	1.04251e-06	0.989465	2.0936e-07	MIC not significant	FALSE	TRUE	FALSE	FALSE	FALSE	TRUE	FALSE	FALSE
pcodonCTGCCT	1267	0.115502	0.0159936	0.252	0.937	0.262547	0.936681	114	0.371835	0.262555	0.000828947	0.999987	2.19954e-05	0.999917	5.61704e-09	MIC not significant	FALSE	TRUE	FALSE	FALSE	FALSE	TRUE	FALSE	FALSE
pcodonCTGCCG	1267	0.109319	0.00189896	0.431	0.502	0.44706	0.513277	81	0.410773	0.297267	0.000828947	0.999855	8.6298e-06	0.998529	1.41752e-07	MIC not significant	FALSE	TRUE	FALSE	FALSE	FALSE	TRUE	FALSE	FALSE
pcodonCTGCAG	1267	0.119994	0.015091	0.024	0.582	0.0118925	0.625701	41	0.663609	0.60049	1.31579e-05	0.999895	1.12313e-10	0.999387	6.89883e-08	Monotone	FALSE	TRUE	FALSE	FALSE	TRUE	TRUE	FALSE	TRUE
pcodonCTGCGT	1267	0.112464	0.00864358	0.166	0.668	0.171403	0.692092	41	0.394396	0.234334	0.042	0.969	0.0244111	0.944402	0.00134212	MIC not significant	FALSE	FALSE	FALSE	FALSE	FALSE	TRUE	FALSE	FALSE
pcodonCTGCGA	1267	0.119041	0.00237949	0.025	0.042	0.0165033	0.0308276	40	0.448693	0.223181	0.023	0.691	0.00673487	0.711113	0.00232244	non-significant monotone/non-monotone	FALSE	TRUE	FALSE	FALSE	FALSE	TRUE	FALSE	FALSE
pcodonCTGCGG	1267	0.114801	0.00535345	0.118	0.279	0.107887	0.318771	47	0.531588	0.333076	0.003	0.966	0.000124815	0.943209	3.06502e-05	MIC not significant	FALSE	TRUE	FALSE	FALSE	FALSE	TRUE	FALSE	FALSE
pcodonCTGATT	1267	0.12439	0.0118646	0.06	0.468	0.0583954	0.472944	164	0.279396	0.192145	0.0192277	1	0.00862118	1	4.347e-09	MIC not significant	FALSE	TRUE	FALSE	FALSE	FALSE	TRUE	FALSE	FALSE
pcodonCTGATC	1267	0.118642	0.00367383	0.083	0.173	0.0831402	0.164487	88	0.450671	0.37143	0.000207921	1	6.67469e-07	0.999995	2.94928e-10	MIC not significant	FALSE	TRUE	FALSE	FALSE	FALSE	TRUE	FALSE	FALSE
pcodonCTGATA	1267	0.112885	0.00437412	0.296	0.483	0.29882	0.49065	83	0.410773	0.330284	0.00478218	1	0.000477518	0.999996	2.47375e-08	MIC not significant	FALSE	TRUE	FALSE	FALSE	FALSE	TRUE	FALSE	FALSE
pcodonCTGATG	1267	0.108428	0.00699891	0.625	0.894	0.633575	0.891948	118	0.459185	0.355626	0	0.99997	3.79867e-13	0.999942	1.03951e-12	MIC not significant	FALSE	TRUE	FALSE	FALSE	FALSE	TRUE	FALSE	FALSE
pcodonCTGACT	1267	0.118068	0.00178	0.07	0.088	0.0659818	0.0880991	70	0.403136	0.344206	0.00812871	1	0.00160395	0.999996	9.43307e-08	MIC not significant	FALSE	TRUE	FALSE	FALSE	FALSE	TRUE	FALSE	FALSE
pcodonCTGACC	1267	0.126151	0.0188875	0.006	0.451	0.00214988	0.486835	62	0.383543	0.305943	0.0105789	0.999974	0.00194405	0.999745	4.63653e-06	Monotone	TRUE	TRUE	FALSE	TRUE	TRUE	TRUE	FALSE	TRUE
pcodonCTGACG	1267	0.122757	0.0088285	0.029	0.23	0.0271113	0.218903	93	0.304914	0.247945	0.0782475	1	0.068047	1	3.80381e-07	MIC not significant	FALSE	FALSE	FALSE	FALSE	FALSE	FALSE	FALSE	FALSE
pcodonCTGAAT	1267	0.112678	0.00304569	0.173	0.289	0.1883	0.311819	46	0.400296	0.310304	0.019	0.998	0.00345718	0.994709	5.7988e-05	MIC not significant	FALSE	TRUE	FALSE	FALSE	FALSE	TRUE	FALSE	FALSE
pcodonCTGAAC	1267	0.10563	0.00167191	0.584	0.642	0.616246	0.674087	48	0.542538	0.337539	0.00140789	0.946711	2.29748e-05	0.920952	2.15597e-05	MIC not significant	FALSE	TRUE	FALSE	FALSE	FALSE	TRUE	FALSE	FALSE
pcodonCTGAAG	1267	0.112524	0.00592289	0.339	0.596	0.350538	0.633411	106	0.504089	0.408901	0	1	3.29921e-13	0.999992	1.6113e-13	MIC not significant	FALSE	TRUE	FALSE	FALSE	FALSE	TRUE	FALSE	FALSE
pcodonCTGAGT	1267	0.100614	0.00247476	0.876	0.935	0.871048	0.921039	50	0.369156	0.279972	0.105066	0.999908	0.0993323	0.999657	9.95004e-05	MIC not significant	FALSE	FALSE	FALSE	FALSE	FALSE	FALSE	FALSE	FALSE
pcodonCTGAGC	1267	0.116342	0.0055411	0.095	0.27	0.0943933	0.282746	66	0.341135	0.17481	0.119	0.998	0.110452	0.988813	0.000477154	MIC not significant	FALSE	FALSE	FALSE	FALSE	FALSE	FALSE	FALSE	FALSE
pcodonCTGAGA	1267	0.11571	0.00012812	0.08	0.064	0.0701636	0.0525275	44	0.379641	0.387745	0.0365743	1	0.0187787	0.999997	1.02244e-05	MIC not significant	FALSE	FALSE	FALSE	FALSE	FALSE	TRUE	FALSE	FALSE
pcodonCTGAGG	1267	0.113299	0.00714501	0.26	0.621	0.275193	0.623867	97	0.405427	0.300947	0.000460526	0.999961	2.08713e-06	0.999837	5.98497e-09	MIC not significant	FALSE	TRUE	FALSE	FALSE	FALSE	TRUE	FALSE	FALSE
pcodonCTGGTC	1267	0.117569	0.00328883	0.044	0.095	0.0472571	0.101634	56	0.326862	0.0802768	0.148	0.529	0.140999	0.5611	0.0343439	MIC not significant	FALSE	FALSE	FALSE	FALSE	FALSE	FALSE	FALSE	FALSE
pcodonCTGGTG	1267	0.10298	0.00461647	0.812	0.945	0.810722	0.927874	82	0.438182	0.280785	0.00126316	0.999342	5.29337e-05	0.99551	4.76435e-07	MIC not significant	FALSE	TRUE	FALSE	FALSE	FALSE	TRUE	FALSE	FALSE
pcodonCTGGCT	1267	0.10703	0.00379949	0.548	0.718	0.557603	0.725134	70	0.387873	0.262609	0.0143289	0.999763	0.00435786	0.998477	5.75685e-06	MIC not significant	FALSE	TRUE	FALSE	FALSE	FALSE	TRUE	FALSE	FALSE
pcodonCTGGCC	1267	0.123276	0.00540695	0.009	0.044	0.00715741	0.0414494	55	0.413131	0.255022	0.01	0.995	0.00282351	0.979914	8.42562e-05	Monotone	TRUE	TRUE	FALSE	TRUE	TRUE	TRUE	FALSE	TRUE
pcodonCTGGCG	1267	0.109985	0.0133192	0.507	0.976	0.521858	0.966269	108	0.403655	0.254005	0.000421053	0.999447	3.59821e-06	0.996352	2.68983e-08	MIC not significant	FALSE	TRUE	FALSE	FALSE	FALSE	TRUE	FALSE	FALSE
pcodonCTGGAA	1267	0.112225	0.00103086	0.194	0.191	0.192011	0.202754	41	0.502243	0.411252	0.00346053	0.999434	9.70882e-05	0.997194	1.03513e-05	MIC not significant	FALSE	TRUE	FALSE	FALSE	FALSE	TRUE	FALSE	FALSE
pcodonCTGGGT	1267	0.129535	0.0107521	0.011	0.146	0.00682508	0.144809	144	0.392119	0.335202	1.9802e-05	1	3.62404e-10	1	2.93458e-14	Monotone	TRUE	TRUE	FALSE	TRUE	TRUE	TRUE	FALSE	TRUE
pcodonCTGGGC	1267	0.147415	0.0292647	0	0.100149	4.51793e-08	0.0963155	101	0.310087	0.239129	0.0259703	1	0.0133956	0.999997	2.11759e-07	Monotone	TRUE	TRUE	FALSE	TRUE	TRUE	TRUE	FALSE	TRUE
pcodonCTGGGA	1267	0.124602	0.0185147	0.081	0.819	0.0651775	0.810339	166	0.386176	0.270406	9.90099e-06	1	1.3485e-11	0.99992	6.97793e-13	MIC not significant	FALSE	TRUE	FALSE	FALSE	FALSE	TRUE	FALSE	FALSE
pcodonCTGGGG	1267	0.117615	0.00286441	0.124	0.201	0.133038	0.206894	92	0.493103	0.277171	0	0.752842	6.05314e-11	0.760381	1.136e-07	MIC not significant	FALSE	TRUE	FALSE	FALSE	FALSE	TRUE	FALSE	FALSE
pcodonCCTTTT	1267	0.121519	0.0180669	0.202	0.933	0.19779	0.930226	215	0.298458	0.113964	0.000276316	0.761263	7.72009e-06	0.766922	3.96232e-07	MIC not significant	FALSE	TRUE	FALSE	FALSE	FALSE	TRUE	FALSE	FALSE
pcodonCCTTTC	1267	0.135214	0.0257766	0.005	0.646	0.000934698	0.630726	154	0.307589	0.1605	0.00747368	0.999724	0.00182104	0.997523	2.62709e-07	Monotone	TRUE	TRUE	FALSE	TRUE	TRUE	TRUE	FALSE	TRUE
pcodonCCTTTA	1267	0.14349	0.0287264	0.000552632	0.489789	8.71704e-05	0.505253	234	0.319088	0.132241	1.31579e-05	0.759711	2.33333e-08	0.766161	1.00208e-08	non-significant monotone/non-monotone	TRUE	TRUE	FALSE	FALSE	TRUE	TRUE	FALSE	FALSE
pcodonCCTTTG	1267	0.124529	0.00778224	0.098	0.346	0.0993481	0.369646	213	0.410419	0.227012	0	0.816693	5.60203e-21	0.815139	1.80625e-13	MIC not significant	FALSE	TRUE	FALSE	FALSE	FALSE	TRUE	FALSE	FALSE
pcodonCCTTCT	1267	0.131186	0.01433	0.004	0.177	0.00253423	0.173981	115	0.397452	0.344503	0.00019802	1	4.34275e-07	1	5.43469e-12	Monotone	TRUE	TRUE	FALSE	TRUE	TRUE	TRUE	FALSE	TRUE
pcodonCCTTCC	1267	0.113036	0.0152272	0.247	0.946	0.249933	0.932695	72	0.269221	0.149316	0.415829	0.999816	0.463969	0.9988	0.000800314	MIC not significant	FALSE	FALSE	FALSE	FALSE	FALSE	FALSE	FALSE	FALSE
pcodonCCTTCA	1267	0.107591	0.00063625	0.477	0.461	0.505593	0.494821	53	0.629094	0.382095	6.57895e-05	0.593632	4.15634e-11	0.627435	8.14781e-07	MIC not significant	FALSE	TRUE	FALSE	FALSE	FALSE	TRUE	FALSE	FALSE
pcodonCCTTCG	1267	0.143612	0.0317474	0.001	0.523	2.05723e-05	0.536925	158	0.330684	0.22859	0.0010297	1	4.11403e-05	0.999996	2.1115e-10	Monotone	TRUE	TRUE	FALSE	TRUE	TRUE	TRUE	FALSE	TRUE
pcodonCCTTAT	1267	0.150655	0.040974	0	0.611129	1.09718e-07	0.626897	159	0.361251	0.187776	5.26316e-05	0.973	1.10087e-07	0.955083	1.16119e-08	Monotone	TRUE	TRUE	FALSE	TRUE	TRUE	TRUE	FALSE	FALSE
pcodonCCTTAC	1267	0.110542	0.0077068	0.292	0.711	0.31635	0.727299	58	0.452896	0.305846	0.00205263	0.99275	5.14239e-05	0.979901	6.73437e-06	MIC not significant	FALSE	TRUE	FALSE	FALSE	FALSE	TRUE	FALSE	FALSE
pcodonCCTTAA	1267	0.112156	0.00928015	0.23	0.748	0.235705	0.758964	50	0.527294	0.350157	0.002	0.98	2.12083e-05	0.962464	9.20747e-06	MIC not significant	FALSE	TRUE	FALSE	FALSE	FALSE	TRUE	FALSE	FALSE
pcodonCCTTAG	1267	0.116818	0.0110865	0.171	0.685	0.174433	0.68259	105	0.60728	0.386635	0	0.761109	6.34992e-24	0.767841	1.4522e-12	MIC not significant	FALSE	TRUE	FALSE	FALSE	FALSE	TRUE	FALSE	FALSE
pcodonCCTTGT	1267	0.0938014	0.00183805	0.994	0.996	0.985715	0.990561	80	0.409481	0.365279	0.00108911	1	1.6487e-05	0.999999	4.96906e-09	MIC not significant	FALSE	TRUE	FALSE	FALSE	FALSE	TRUE	FALSE	FALSE
pcodonCCTTGC	1267	0.12701	0.0251227	0.01	0.829	0.00456342	0.83121	88	0.491138	0.323074	3.94737e-05	0.99475	2.45617e-09	0.982771	7.62535e-09	Monotone	TRUE	TRUE	FALSE	TRUE	TRUE	TRUE	FALSE	TRUE
pcodonCCTTGA	1267	0.126593	0.0163344	0.017	0.466	0.0125001	0.48389	113	0.429138	0.237678	7.89474e-05	0.913816	5.36074e-09	0.89511	4.33946e-08	non-significant monotone/non-monotone	FALSE	TRUE	FALSE	FALSE	TRUE	TRUE	FALSE	FALSE
pcodonCCTTGG	1267	0.125054	0.0168568	0.055	0.712	0.0474606	0.720451	170	0.369621	0.270005	1.9802e-05	1	1.08583e-10	0.99999	3.84744e-13	MIC not significant	FALSE	TRUE	FALSE	FALSE	FALSE	TRUE	FALSE	FALSE
pcodonCCTCTT	1267	0.132299	0.0106003	0.007	0.097	0.00435775	0.0944271	152	0.386302	0.241138	1.31579e-05	0.999816	8.03102e-09	0.998285	1.33566e-10	Monotone	TRUE	TRUE	FALSE	TRUE	TRUE	TRUE	FALSE	TRUE
pcodonCCTCTA	1267	0.109005	0.00652028	0.422	0.768	0.445451	0.771157	65	0.380084	0.15928	0.041	0.889	0.0223159	0.864595	0.000990535	MIC not significant	FALSE	FALSE	FALSE	FALSE	FALSE	TRUE	FALSE	FALSE
pcodonCCTCTG	1267	0.11011	0.00318423	0.346	0.473	0.360855	0.504289	61	0.36494	0.251675	0.0211316	0.998961	0.00837677	0.996447	3.80887e-05	MIC not significant	FALSE	TRUE	FALSE	FALSE	FALSE	TRUE	FALSE	FALSE
pcodonCCTCCT	1267	0.141792	0.0378955	0.00025	0.870434	3.64238e-05	0.867051	157	0.385792	0.182424	1.31579e-05	0.727171	1.24524e-09	0.738687	2.42559e-08	non-significant monotone/non-monotone	TRUE	TRUE	FALSE	FALSE	TRUE	TRUE	FALSE	FALSE
pcodonCCTCCG	1267	0.118605	0.0169082	0.096	0.842	0.0857171	0.835052	92	0.349697	0.185778	0.026	0.995	0.00741218	0.980619	1.79411e-05	MIC not significant	FALSE	TRUE	FALSE	FALSE	FALSE	TRUE	FALSE	FALSE
pcodonCCTCAG	1267	0.11177	0.0123414	0.233	0.909	0.231093	0.905317	47	0.532042	0.441622	0.00264474	0.999934	0.000105387	0.999685	8.06317e-07	MIC not significant	FALSE	TRUE	FALSE	FALSE	FALSE	TRUE	FALSE	FALSE
pcodonCCTCGT	1267	0.120534	0.00949071	0.036	0.251	0.026732	0.268663	68	0.430898	0.241129	0.004	0.964	0.000393749	0.942719	2.71243e-05	Monotone	FALSE	TRUE	FALSE	FALSE	FALSE	TRUE	FALSE	FALSE
pcodonCCTCGG	1267	0.100397	0.00201438	0.891	0.924	0.876851	0.916252	53	0.490045	0.402993	0.00184211	0.999947	5.05517e-05	0.99965	6.76606e-07	MIC not significant	FALSE	TRUE	FALSE	FALSE	FALSE	TRUE	FALSE	FALSE
pcodonCCTATT	1267	0.175783	0.0435023	0	0.0201584	1.09996e-15	0.0144336	283	0.296076	0.159447	3.94737e-05	0.9995	8.92707e-10	0.996779	2.94804e-12	Monotone	TRUE	TRUE	FALSE	TRUE	TRUE	TRUE	FALSE	TRUE
pcodonCCTATC	1267	0.129929	0.026943	0.002	0.807	0.00243189	0.810987	101	0.303155	0.128235	0.033	0.951	0.0243204	0.929806	0.00023621	Monotone	TRUE	TRUE	FALSE	FALSE	TRUE	TRUE	FALSE	FALSE
pcodonCCTATA	1267	0.122513	0.00414084	0.077	0.16	0.0778336	0.164436	142	0.452887	0.307425	0	0.999248	1.30974e-16	0.995313	8.13353e-13	MIC not significant	FALSE	TRUE	FALSE	FALSE	FALSE	TRUE	FALSE	FALSE
pcodonCCTATG	1267	0.120837	0.0168108	0.225	0.917	0.229248	0.907648	201	0.311544	0.137355	0.001	0.967	1.27648e-05	0.951858	6.10513e-08	MIC not significant	FALSE	TRUE	FALSE	FALSE	FALSE	TRUE	FALSE	FALSE
pcodonCCTACT	1267	0.131775	0.023461	0.002	0.541	0.000634038	0.530146	101	0.288738	0.162355	0.0692105	0.999711	0.0564498	0.997957	2.94672e-05	MIC not significant	TRUE	FALSE	FALSE	FALSE	TRUE	FALSE	FALSE	FALSE
pcodonCCTACC	1267	0.114754	0.0134327	0.157	0.813	0.142696	0.817609	57	0.394421	0.320935	0.0172237	0.999987	0.00537572	0.999839	4.35758e-06	MIC not significant	FALSE	TRUE	FALSE	FALSE	FALSE	TRUE	FALSE	FALSE
pcodonCCTACG	1267	0.139462	0.0259565	0.001	0.278	1.65271e-05	0.29281	116	0.323862	0.217036	0.0113861	1	0.00331359	0.999931	1.36439e-07	Monotone	TRUE	TRUE	FALSE	TRUE	TRUE	TRUE	FALSE	TRUE
pcodonCCTAAT	1267	0.10176	0.00112834	0.818	0.845	0.831768	0.846575	52	0.383377	0.148652	0.042	0.722	0.0355473	0.752515	0.00503021	MIC not significant	FALSE	FALSE	FALSE	FALSE	FALSE	TRUE	FALSE	FALSE
pcodonCCTAAC	1267	0.109028	0.00651097	0.411	0.772	0.430968	0.782059	49	0.380785	0.21613	0.113	0.996	0.106345	0.980004	0.000868956	MIC not significant	FALSE	FALSE	FALSE	FALSE	FALSE	FALSE	FALSE	FALSE
pcodonCCTAAG	1267	0.132805	0.0275806	0.008	0.797	0.00415837	0.810214	149	0.341267	0.139576	0.003	0.813	5.24742e-05	0.813908	2.69206e-06	non-significant monotone/non-monotone	TRUE	TRUE	FALSE	FALSE	TRUE	TRUE	FALSE	FALSE
pcodonCCTAGT	1267	0.107788	0.00375114	0.475	0.647	0.501901	0.67584	66	0.420269	0.252858	0.009	0.997	0.00169442	0.990487	2.19886e-05	MIC not significant	FALSE	TRUE	FALSE	FALSE	FALSE	TRUE	FALSE	FALSE
pcodonCCTAGC	1267	0.114329	0.0072106	0.129	0.439	0.132218	0.468696	58	0.305868	0.115372	0.194	0.892	0.208033	0.868527	0.00909254	MIC not significant	FALSE	FALSE	FALSE	FALSE	FALSE	FALSE	FALSE	FALSE
pcodonCCTAGA	1267	0.109226	0.00766645	0.39	0.803	0.396885	0.803905	57	0.36887	0.164748	0.042	0.842	0.0228354	0.833931	0.00173285	MIC not significant	FALSE	FALSE	FALSE	FALSE	FALSE	TRUE	FALSE	FALSE
pcodonCCTAGG	1267	0.116312	0.00970162	0.23	0.683	0.236555	0.692882	125	0.332104	0.154677	0.012	0.995	0.00420701	0.976586	5.7018e-06	MIC not significant	FALSE	TRUE	FALSE	FALSE	FALSE	TRUE	FALSE	FALSE
pcodonCCTGTC	1267	0.116871	0.01944	0.132	0.951	0.126249	0.939064	90	0.400727	0.317303	0.00151485	1	7.43971e-05	0.99999	7.48016e-09	MIC not significant	FALSE	TRUE	FALSE	FALSE	FALSE	TRUE	FALSE	FALSE
pcodonCCTGTG	1267	0.124075	0.0102744	0.034	0.264	0.029787	0.280614	114	0.516222	0.359617	0	0.997426	1.27958e-17	0.989432	1.78872e-12	Monotone	FALSE	TRUE	FALSE	FALSE	FALSE	TRUE	FALSE	FALSE
pcodonCCTGCT	1267	0.11149	0.0116114	0.318	0.874	0.335313	0.877178	83	0.473	0.334403	0.000184211	0.999776	5.25909e-07	0.998735	1.03374e-08	MIC not significant	FALSE	TRUE	FALSE	FALSE	FALSE	TRUE	FALSE	FALSE
pcodonCCTGCC	1267	0.133906	0.0171897	0.001	0.08	7.09208e-05	0.0835374	80	0.477454	0.406293	2.9703e-05	1	1.66354e-09	0.999978	2.05018e-10	Monotone	TRUE	TRUE	FALSE	TRUE	TRUE	TRUE	FALSE	TRUE
pcodonCCTGCA	1267	0.11541	0.00320265	0.074	0.154	0.0614997	0.13561	40	0.361142	0.383098	0.107941	1	0.103156	0.999999	3.08845e-05	MIC not significant	FALSE	FALSE	FALSE	FALSE	FALSE	FALSE	FALSE	FALSE
pcodonCCTGCG	1267	0.130154	0.031151	0.013	0.974	0.00733567	0.961293	152	0.32187	0.24314	0.00448515	1	0.000660098	1	1.09122e-10	Monotone	TRUE	TRUE	FALSE	TRUE	TRUE	TRUE	FALSE	TRUE
pcodonCCTGAA	1267	0.129855	0.0189645	0.00190789	0.278816	0.000524354	0.291405	70	0.362216	0.108406	0.036	0.503	0.0249591	0.540454	0.00538312	non-significant monotone/non-monotone	TRUE	FALSE	FALSE	FALSE	TRUE	TRUE	FALSE	FALSE
pcodonCCTGGT	1267	0.149038	0.0494095	2.63158e-05	0.970592	7.46481e-07	0.963191	176	0.32637	0.262935	0.000722772	1	2.32996e-05	1	3.44723e-13	Monotone	TRUE	TRUE	FALSE	TRUE	TRUE	TRUE	FALSE	TRUE
pcodonCCTGGC	1267	0.120621	0.0176757	0.089	0.839	0.0879868	0.839203	121	0.375813	0.25449	0.000223684	0.999961	8.74987e-07	0.999408	3.64287e-09	MIC not significant	FALSE	TRUE	FALSE	FALSE	FALSE	TRUE	FALSE	FALSE
pcodonCCTGGA	1267	0.129968	0.0270416	0.02	0.909	0.0132985	0.896089	169	0.265563	0.162927	0.0305248	1	0.0186061	0.999988	5.27636e-08	Monotone	FALSE	TRUE	FALSE	FALSE	TRUE	TRUE	FALSE	TRUE
pcodonCCTGGG	1267	0.133626	0.0077882	0.007	0.046	0.00254128	0.0329038	168	0.335909	0.27493	0.000168317	1	6.51142e-07	1	2.99645e-13	Monotone	TRUE	TRUE	FALSE	TRUE	TRUE	TRUE	FALSE	TRUE
pcodonCCCTTT	1267	0.122748	0.00067497	0.028	0.03	0.0222179	0.0207068	77	0.401082	0.321984	0.00286139	1	0.000140084	0.999959	7.40233e-08	Monotone	FALSE	TRUE	FALSE	FALSE	FALSE	TRUE	FALSE	FALSE
pcodonCCCTTC	1267	0.122255	0.014242	0.027	0.414	0.0181769	0.453092	65	0.30375	0.194838	0.319395	0.999974	0.359771	0.999703	0.000232681	MIC not significant	FALSE	FALSE	FALSE	FALSE	FALSE	FALSE	FALSE	FALSE
pcodonCCCTTA	1267	0.102921	0.00517807	0.759	0.929	0.76841	0.918235	70	0.407968	0.213817	0.005	0.942	0.000973152	0.919503	5.57719e-05	MIC not significant	FALSE	TRUE	FALSE	FALSE	FALSE	TRUE	FALSE	FALSE
pcodonCCCTTG	1267	0.107021	0.00606077	0.533	0.835	0.547002	0.837689	57	0.495233	0.415268	0.000644737	0.999974	2.46643e-06	0.999737	1.52876e-07	MIC not significant	FALSE	TRUE	FALSE	FALSE	FALSE	TRUE	FALSE	FALSE
pcodonCCCTCT	1267	0.10211	0.00183337	0.818	0.863	0.826911	0.872353	50	0.429413	0.378575	0.0221584	1	0.00852853	0.99998	1.9862e-06	MIC not significant	FALSE	TRUE	FALSE	FALSE	FALSE	TRUE	FALSE	FALSE
pcodonCCCTCG	1267	0.106962	0.00301024	0.49	0.641	0.52222	0.671835	48	0.483872	0.42978	0.00796053	0.999987	0.00117082	0.99997	4.25856e-07	MIC not significant	FALSE	TRUE	FALSE	FALSE	FALSE	TRUE	FALSE	FALSE
pcodonCCCTGC	1267	0.10644	0.00767462	0.561	0.929	0.592798	0.920658	47	0.386245	0.2228	0.115	0.995	0.114722	0.986416	0.00092302	MIC not significant	FALSE	FALSE	FALSE	FALSE	FALSE	FALSE	FALSE	FALSE
pcodonCCCTGA	1267	0.0985042	0.000882488	0.963	0.971	0.951916	0.955861	40	0.701107	0.51581	2.63158e-05	0.916263	5.22278e-12	0.888495	6.5155e-07	MIC not significant	FALSE	TRUE	FALSE	FALSE	FALSE	TRUE	FALSE	FALSE
pcodonCCCTGG	1267	0.104217	0.0039148	0.738	0.871	0.74041	0.869836	82	0.399479	0.288605	0.00798684	0.999987	0.00162048	0.999901	1.95483e-07	MIC not significant	FALSE	TRUE	FALSE	FALSE	FALSE	TRUE	FALSE	FALSE
pcodonCCCCTT	1267	0.114079	0.00430482	0.114	0.257	0.114233	0.279035	43	0.339801	0.208952	0.124	0.99	0.127734	0.975275	0.00227727	MIC not significant	FALSE	FALSE	FALSE	FALSE	FALSE	FALSE	FALSE	FALSE
pcodonCCCATT	1267	0.1169	0.0118026	0.073	0.583	0.0727528	0.601483	61	0.471644	0.374679	0.000631579	0.999763	1.63892e-06	0.99887	3.14909e-07	MIC not significant	FALSE	TRUE	FALSE	FALSE	FALSE	TRUE	FALSE	FALSE
pcodonCCCATG	1267	0.117173	0.00233354	0.055	0.079	0.044803	0.074331	45	0.416968	0.306154	0.011	0.998	0.00198816	0.988981	8.07515e-05	MIC not significant	FALSE	TRUE	FALSE	FALSE	FALSE	TRUE	FALSE	FALSE
pcodonCCCACG	1267	0.11553	0.00903899	0.073	0.483	0.077375	0.506543	49	0.403704	0.273742	0.062	0.999	0.0342166	0.995574	0.000114686	MIC not significant	FALSE	FALSE	FALSE	FALSE	FALSE	TRUE	FALSE	FALSE
pcodonCCCAAG	1267	0.11155	0.00582077	0.218	0.535	0.232072	0.568899	44	0.302007	0.211898	0.214211	0.999105	0.243756	0.996743	0.00185467	MIC not significant	FALSE	FALSE	FALSE	FALSE	FALSE	FALSE	FALSE	FALSE
pcodonCCCAGG	1267	0.106028	0.0060426	0.593	0.876	0.61417	0.868401	62	0.575655	0.515398	1.9802e-05	1	7.38222e-13	0.99994	0	MIC not significant	FALSE	TRUE	FALSE	FALSE	FALSE	TRUE	FALSE	FALSE
pcodonCCCGCG	1267	0.110375	0.0139505	0.344	0.964	0.359814	0.945081	60	0.487602	0.380901	0.001	0.999	9.82849e-07	0.996232	3.0462e-07	MIC not significant	FALSE	TRUE	FALSE	FALSE	FALSE	TRUE	FALSE	FALSE
pcodonCCCGGT	1267	0.104594	0.00108163	0.676	0.689	0.683703	0.701761	57	0.462578	0.33428	0.002	0.998	4.51806e-05	0.993288	3.8727e-06	MIC not significant	FALSE	TRUE	FALSE	FALSE	FALSE	TRUE	FALSE	FALSE
pcodonCCCGGC	1267	0.105931	0.00597706	0.571	0.872	0.59915	0.865863	50	0.434301	0.133571	0.023	0.306	0.00877877	0.355325	0.00941774	MIC not significant	FALSE	TRUE	FALSE	FALSE	FALSE	TRUE	FALSE	FALSE
pcodonCCCGGA	1267	0.115129	0.00671679	0.101	0.386	0.107979	0.397532	51	0.301667	0.0980021	0.388	0.929	0.455961	0.89537	0.0253012	MIC not significant	FALSE	FALSE	FALSE	FALSE	FALSE	FALSE	FALSE	FALSE
pcodonCCCGGG	1267	0.113853	0.00583143	0.155	0.397	0.155779	0.422206	49	0.365028	0.0999062	0.145	0.581	0.148099	0.615392	0.026932	MIC not significant	FALSE	FALSE	FALSE	FALSE	FALSE	FALSE	FALSE	FALSE
pcodonCCATGG	1267	0.101898	0.000736197	0.872	0.866	0.862365	0.860965	40	0.471462	0.429437	0.00822368	0.999961	0.000985064	0.999845	4.45727e-06	MIC not significant	FALSE	TRUE	FALSE	FALSE	FALSE	TRUE	FALSE	FALSE
pcodonCCACTT	1267	0.10778	0.00310682	0.45	0.599	0.479435	0.630571	49	0.385415	0.237171	0.078	0.999	0.0668609	0.992895	0.000387333	MIC not significant	FALSE	FALSE	FALSE	FALSE	FALSE	FALSE	FALSE	FALSE
pcodonCCAATT	1267	0.110959	0.00209025	0.395	0.486	0.420268	0.493008	91	0.30152	0.222685	0.101605	0.999987	0.0952933	0.999993	2.33571e-06	MIC not significant	FALSE	FALSE	FALSE	FALSE	FALSE	FALSE	FALSE	FALSE
pcodonCCAATA	1267	0.111571	0.00537147	0.241	0.496	0.244622	0.541174	44	0.449033	0.293231	0.008	0.965	0.000435825	0.931716	0.000186065	MIC not significant	FALSE	TRUE	FALSE	FALSE	FALSE	TRUE	FALSE	FALSE
pcodonCCAATG	1267	0.111585	0.00467789	0.216	0.428	0.230914	0.470548	47	0.29802	0.14287	0.525	0.997	0.578485	0.987436	0.00880581	MIC not significant	FALSE	FALSE	FALSE	FALSE	FALSE	FALSE	FALSE	FALSE
pcodonCCAAGG	1267	0.111171	0.00316941	0.252	0.397	0.252981	0.407278	41	0.493283	0.212678	0.004	0.261	0.000182209	0.297368	0.00240804	MIC not significant	FALSE	TRUE	FALSE	FALSE	FALSE	TRUE	FALSE	FALSE
pcodonCCAGGT	1267	0.112547	0.00426616	0.198	0.377	0.194265	0.396643	44	0.474625	0.294453	0.003	0.885	0.00011541	0.861768	0.000179515	MIC not significant	FALSE	TRUE	FALSE	FALSE	FALSE	TRUE	FALSE	FALSE
pcodonCCGTTT	1267	0.120364	0.00316841	0.073	0.12	0.0642625	0.115674	97	0.413141	0.264349	0.000210526	0.997868	6.90947e-07	0.990367	7.17896e-08	MIC not significant	FALSE	TRUE	FALSE	FALSE	FALSE	TRUE	FALSE	FALSE
pcodonCCGTTC	1267	0.115136	0.00410896	0.142	0.24	0.129619	0.265423	69	0.514629	0.410427	0.000197368	0.999934	4.53235e-08	0.999736	3.05521e-09	MIC not significant	FALSE	TRUE	FALSE	FALSE	FALSE	TRUE	FALSE	FALSE
pcodonCCGTTA	1267	0.112851	0.0096298	0.358	0.801	0.367993	0.807817	106	0.363006	0.150377	0.01	0.823	0.00147305	0.818468	4.0072e-05	MIC not significant	FALSE	TRUE	FALSE	FALSE	FALSE	TRUE	FALSE	FALSE
pcodonCCGTTG	1267	0.108289	0.00149029	0.597	0.64	0.61439	0.654225	102	0.387219	0.27225	0.00322368	0.999974	0.000284769	0.99994	1.86965e-08	MIC not significant	FALSE	TRUE	FALSE	FALSE	FALSE	TRUE	FALSE	FALSE
pcodonCCGTCT	1267	0.102215	0.0090029	0.806	0.992	0.811254	0.985398	59	0.331558	0.199133	0.091	0.996	0.0747166	0.989871	0.000396426	MIC not significant	FALSE	FALSE	FALSE	FALSE	FALSE	FALSE	FALSE	FALSE
pcodonCCGTCC	1267	0.110528	0.00764574	0.311	0.752	0.321464	0.76673	44	0.41922	0.357661	0.0135395	0.999829	0.00273128	0.999396	1.81041e-05	MIC not significant	FALSE	TRUE	FALSE	FALSE	FALSE	TRUE	FALSE	FALSE
pcodonCCGTCG	1267	0.120147	0.0130166	0.061	0.601	0.0579469	0.610017	105	0.421489	0.359667	0.000178218	1	1.10767e-06	1	1.37825e-11	MIC not significant	FALSE	TRUE	FALSE	FALSE	FALSE	TRUE	FALSE	FALSE
pcodonCCGTAT	1267	0.109645	0.00277413	0.363	0.491	0.3873	0.521467	45	0.256892	0.256231	0.444671	0.999987	0.506326	0.999994	0.000462987	MIC not significant	FALSE	FALSE	FALSE	FALSE	FALSE	FALSE	FALSE	FALSE
pcodonCCGTAG	1267	0.103565	0.0027692	0.731	0.835	0.744348	0.839791	45	0.591574	0.475931	0.000144737	0.996145	9.67525e-10	0.986242	1.5874e-07	MIC not significant	FALSE	TRUE	FALSE	FALSE	FALSE	TRUE	FALSE	FALSE
pcodonCCGTGT	1267	0.105282	0.000362767	0.634	0.598	0.65921	0.629309	42	0.507386	0.330152	0.003	0.914	2.60406e-05	0.88477	9.28125e-05	MIC not significant	FALSE	TRUE	FALSE	FALSE	FALSE	TRUE	FALSE	FALSE
pcodonCCGTGC	1267	0.11497	0.0115684	0.157	0.687	0.149979	0.707177	67	0.473985	0.366511	0.00113158	0.999974	1.85244e-05	0.999716	5.72416e-08	MIC not significant	FALSE	TRUE	FALSE	FALSE	FALSE	TRUE	FALSE	FALSE
pcodonCCGTGA	1267	0.102735	0.000330752	0.784	0.774	0.803358	0.782731	49	0.524979	0.450154	0.00167105	0.999974	4.15096e-05	0.999878	1.32529e-07	MIC not significant	FALSE	TRUE	FALSE	FALSE	FALSE	TRUE	FALSE	FALSE
pcodonCCGTGG	1267	0.122898	0.0144423	0.045	0.573	0.0416641	0.589398	115	0.414187	0.294257	6.57895e-05	0.999987	2.87772e-08	0.999718	3.80166e-10	Monotone	FALSE	TRUE	FALSE	FALSE	FALSE	TRUE	FALSE	FALSE
pcodonCCGCTT	1267	0.13878	0.0234915	0.001	0.303	0.000115423	0.328216	162	0.370178	0.215078	2.63158e-05	0.997579	4.84991e-09	0.989852	5.12558e-10	Monotone	TRUE	TRUE	FALSE	TRUE	TRUE	TRUE	FALSE	TRUE
pcodonCCGCTC	1267	0.117021	0.00928446	0.071	0.401	0.0643512	0.425646	58	0.358291	0.249124	0.027	0.999	0.0195994	0.998126	6.65803e-05	MIC not significant	FALSE	TRUE	FALSE	FALSE	FALSE	TRUE	FALSE	FALSE
pcodonCCGCTA	1267	0.122276	0.00916958	0.018	0.176	0.0127331	0.172274	68	0.479662	0.355197	0.000592105	0.999868	6.27278e-06	0.998904	1.589e-07	Monotone	FALSE	TRUE	FALSE	FALSE	TRUE	TRUE	FALSE	TRUE
pcodonCCGCTG	1267	0.119397	0.0210609	0.076	0.931	0.0715307	0.924623	84	0.378583	0.360699	0.0121782	1	0.00365776	1	1.54997e-09	MIC not significant	FALSE	TRUE	FALSE	FALSE	FALSE	TRUE	FALSE	FALSE
pcodonCCGCCT	1267	0.113552	0.0186768	0.294	0.992	0.31477	0.982284	103	0.337478	0.180142	0.0286316	0.999355	0.0155984	0.995695	7.89303e-06	MIC not significant	FALSE	TRUE	FALSE	FALSE	FALSE	TRUE	FALSE	FALSE
pcodonCCGCCG	1267	0.121303	0.0103347	0.028	0.303	0.0268328	0.310284	81	0.403098	0.191907	0.001	0.671	2.49741e-05	0.68521	4.31198e-05	non-significant monotone/non-monotone	FALSE	TRUE	FALSE	FALSE	FALSE	TRUE	FALSE	FALSE
pcodonCCGCAG	1267	0.111543	0.00512701	0.262	0.508	0.263498	0.534187	51	0.514631	0.452485	0.00164474	0.999987	2.95644e-05	0.999945	1.86574e-07	MIC not significant	FALSE	TRUE	FALSE	FALSE	FALSE	TRUE	FALSE	FALSE
pcodonCCGCGT	1267	0.107258	0.00878565	0.511	0.932	0.531739	0.924964	51	0.536528	0.420796	0.000815789	0.999487	4.23379e-06	0.99815	5.81076e-07	MIC not significant	FALSE	TRUE	FALSE	FALSE	FALSE	TRUE	FALSE	FALSE
pcodonCCGATT	1267	0.127163	0.0143429	0.065	0.604	0.0552078	0.60418	233	0.345017	0.172555	0	0.941495	1.1985e-11	0.925558	3.90455e-11	MIC not significant	FALSE	TRUE	FALSE	FALSE	FALSE	TRUE	FALSE	FALSE
pcodonCCGATC	1267	0.107333	0.00470807	0.548	0.762	0.550031	0.768596	70	0.316401	0.189112	0.155171	0.999816	0.161506	0.998449	0.000194701	MIC not significant	FALSE	FALSE	FALSE	FALSE	FALSE	FALSE	FALSE	FALSE
pcodonCCGATA	1267	0.112552	0.00611621	0.283	0.586	0.278506	0.587986	73	0.363416	0.252529	0.0214342	0.999947	0.00914898	0.999411	5.88969e-06	MIC not significant	FALSE	TRUE	FALSE	FALSE	FALSE	TRUE	FALSE	FALSE
pcodonCCGATG	1267	0.116358	0.0072521	0.348	0.672	0.350571	0.69275	167	0.456815	0.399407	0	1	6.97023e-22	1	5.25901e-20	MIC not significant	FALSE	TRUE	FALSE	FALSE	FALSE	TRUE	FALSE	FALSE
pcodonCCGACT	1267	0.121756	0.0109451	0.027	0.298	0.0198895	0.310287	74	0.278257	0.0892131	0.309	0.929	0.349652	0.913362	0.00973946	MIC not significant	FALSE	FALSE	FALSE	FALSE	FALSE	FALSE	FALSE	FALSE
pcodonCCGACC	1267	0.118063	0.0124849	0.064	0.591	0.0527168	0.608132	61	0.435982	0.316549	0.001	0.998	3.01175e-05	0.995401	2.36633e-06	MIC not significant	FALSE	TRUE	FALSE	FALSE	FALSE	TRUE	FALSE	FALSE
pcodonCCGACG	1267	0.118103	0.0100044	0.184	0.62	0.173562	0.637456	120	0.349509	0.244474	0.00130263	0.999987	6.67476e-05	0.999933	9.48689e-09	MIC not significant	FALSE	TRUE	FALSE	FALSE	FALSE	TRUE	FALSE	FALSE
pcodonCCGAAC	1267	0.108226	0.00105751	0.407	0.413	0.430973	0.443273	41	0.546439	0.369681	0.001	0.932	1.64178e-06	0.894394	3.62084e-05	MIC not significant	FALSE	TRUE	FALSE	FALSE	FALSE	TRUE	FALSE	FALSE
pcodonCCGAAG	1267	0.125732	0.0121075	0.032	0.319	0.0221708	0.341658	126	0.373391	0.328877	0.000811881	1	2.53496e-05	1	2.24288e-12	Monotone	FALSE	TRUE	FALSE	FALSE	FALSE	TRUE	FALSE	FALSE
pcodonCCGAGT	1267	0.105117	0.0039011	0.638	0.814	0.667348	0.816335	67	0.481525	0.385713	0.000671053	0.999961	7.76392e-06	0.999878	2.05573e-08	MIC not significant	FALSE	TRUE	FALSE	FALSE	FALSE	TRUE	FALSE	FALSE
pcodonCCGAGC	1267	0.125178	0.0185912	0.011	0.539	0.00563938	0.55536	74	0.420961	0.221254	0.002	0.865	4.22209e-05	0.855037	2.349e-05	non-significant monotone/non-monotone	TRUE	TRUE	FALSE	FALSE	TRUE	TRUE	FALSE	FALSE
pcodonCCGAGA	1267	0.110772	0.000890102	0.304	0.307	0.32644	0.334357	62	0.448946	0.334027	0.001	0.999	1.26908e-05	0.995278	1.43151e-06	MIC not significant	FALSE	TRUE	FALSE	FALSE	FALSE	TRUE	FALSE	FALSE
pcodonCCGAGG	1267	0.136725	0.0331848	0.000723684	0.806487	0.000108453	0.808538	113	0.398187	0.246466	0.000118421	0.998829	1.05967e-06	0.994098	2.24163e-08	Monotone	TRUE	TRUE	FALSE	TRUE	TRUE	TRUE	FALSE	TRUE
pcodonCCGGTC	1267	0.100942	0.00495273	0.854	0.973	0.85949	0.959034	65	0.606224	0.363312	0	0.724752	1.69463e-11	0.737361	2.1079e-07	MIC not significant	FALSE	TRUE	FALSE	FALSE	FALSE	TRUE	FALSE	FALSE
pcodonCCGGTG	1267	0.115903	0.0173888	0.13	0.934	0.108435	0.908668	71	0.344565	0.220982	0.0581974	0.999789	0.0435228	0.998725	4.35588e-05	MIC not significant	FALSE	FALSE	FALSE	FALSE	FALSE	FALSE	FALSE	FALSE
pcodonCCGGCT	1267	0.1184	0.0149913	0.094	0.738	0.0835074	0.753258	84	0.529497	0.297404	0	0.748248	1.20177e-10	0.755561	1.36486e-07	MIC not significant	FALSE	TRUE	FALSE	FALSE	FALSE	TRUE	FALSE	FALSE
pcodonCCGGCC	1267	0.120024	0.0179852	0.059	0.788	0.0547039	0.794701	82	0.364533	0.186762	0.04	0.995	0.0227894	0.977174	5.02883e-05	MIC not significant	FALSE	FALSE	FALSE	FALSE	FALSE	TRUE	FALSE	FALSE
pcodonCCGGCG	1267	0.139839	0.0198349	0.000131579	0.0893158	2.79425e-05	0.0849003	122	0.324514	0.175051	0.002	0.999	0.00107448	0.99036	1.62208e-06	Monotone	TRUE	TRUE	FALSE	TRUE	TRUE	TRUE	FALSE	TRUE
pcodonCCGGAA	1267	0.11739	0.00590177	0.048	0.2	0.0421035	0.205852	41	0.505933	0.487363	0.00277228	1	6.95002e-05	0.99997	3.89453e-07	Monotone	FALSE	TRUE	FALSE	FALSE	FALSE	TRUE	FALSE	FALSE
pcodonCCGGGT	1267	0.122906	0.0119186	0.023	0.349	0.0194675	0.357504	92	0.342366	0.277657	0.0191287	1	0.00779437	0.999999	6.82009e-08	Monotone	FALSE	TRUE	FALSE	FALSE	FALSE	TRUE	FALSE	FALSE
pcodonCCGGGC	1267	0.114005	0.0116101	0.168	0.742	0.152099	0.757053	67	0.365251	0.232527	0.053	0.999	0.0344119	0.997874	3.59604e-05	MIC not significant	FALSE	FALSE	FALSE	FALSE	FALSE	TRUE	FALSE	FALSE
pcodonCCGGGA	1267	0.128224	0.0124245	0.014	0.2	0.00728841	0.214313	116	0.546516	0.385037	0	0.993901	1.75297e-22	0.982279	1.09238e-13	Monotone	FALSE	TRUE	FALSE	FALSE	TRUE	TRUE	FALSE	TRUE
pcodonCCGGGG	1267	0.114521	0.00629564	0.144	0.389	0.14757	0.424016	63	0.491751	0.27	0.003	0.892	5.34352e-05	0.880585	1.27686e-05	MIC not significant	FALSE	TRUE	FALSE	FALSE	FALSE	TRUE	FALSE	FALSE
pcodonCAGTTT	1267	0.109063	0.0118888	0.428	0.947	0.464511	0.939175	83	0.399541	0.212345	0.011	0.987	0.000758136	0.966931	1.1663e-05	MIC not significant	FALSE	TRUE	FALSE	FALSE	FALSE	TRUE	FALSE	FALSE
pcodonCAGTTA	1267	0.104393	0.00153827	0.649	0.702	0.675079	0.720562	58	0.350273	0.301927	0.0549208	1	0.039489	0.999981	1.12553e-05	MIC not significant	FALSE	FALSE	FALSE	FALSE	FALSE	FALSE	FALSE	FALSE
pcodonCAGTTG	1267	0.109942	0.00519795	0.325	0.601	0.328794	0.634713	44	0.417345	0.189185	0.011	0.525	0.00303957	0.565975	0.00343941	MIC not significant	FALSE	TRUE	FALSE	FALSE	FALSE	TRUE	FALSE	FALSE
pcodonCAGTCG	1267	0.10379	0.00208175	0.72	0.809	0.739997	0.814654	41	0.341686	0.0952569	0.14	0.474	0.141564	0.532715	0.0496052	MIC not significant	FALSE	FALSE	FALSE	FALSE	FALSE	FALSE	FALSE	FALSE
pcodonCAGTGC	1267	0.128711	0.00844183	0.001	0.018	0.00014708	0.00953652	52	0.376443	0.237867	0.062	0.997	0.061155	0.990003	0.00024505	MIC not significant	TRUE	FALSE	FALSE	FALSE	TRUE	FALSE	FALSE	FALSE
pcodonCAGTGG	1267	0.124803	0.0198284	0.013	0.633	0.00559036	0.645372	76	0.40602	0.336067	0.00287129	1	0.000139654	0.999986	7.63048e-08	Monotone	TRUE	TRUE	FALSE	TRUE	TRUE	TRUE	FALSE	TRUE
pcodonCAGCTT	1267	0.112792	0.0125549	0.226	0.873	0.23019	0.862646	63	0.517839	0.364959	0.000394737	0.999184	3.41811e-06	0.995317	3.05604e-07	MIC not significant	FALSE	TRUE	FALSE	FALSE	FALSE	TRUE	FALSE	FALSE
pcodonCAGCAG	1267	0.122412	0.0097553	0.015	0.179	0.0099924	0.178291	56	0.700925	0.476302	0	0.69201	9.83873e-18	0.709537	3.9977e-09	non-significant monotone/non-monotone	FALSE	TRUE	FALSE	FALSE	TRUE	TRUE	FALSE	FALSE
pcodonCAGATT	1267	0.11918	0.0133218	0.125	0.733	0.126964	0.734531	117	0.479587	0.425469	0	1	8.73432e-15	1	1.62875e-15	MIC not significant	FALSE	TRUE	FALSE	FALSE	FALSE	TRUE	FALSE	FALSE
pcodonCAGATC	1267	0.120219	0.0156139	0.026	0.617	0.0162433	0.642067	48	0.570415	0.264158	0.002	0.313	2.94163e-06	0.356531	0.0001866	non-significant monotone/non-monotone	FALSE	TRUE	FALSE	FALSE	FALSE	TRUE	FALSE	FALSE
pcodonCAGATG	1267	0.118344	0.0180235	0.111	0.888	0.111356	0.885202	102	0.423841	0.358809	0.00039604	1	3.91217e-06	1	2.92074e-11	MIC not significant	FALSE	TRUE	FALSE	FALSE	FALSE	TRUE	FALSE	FALSE
pcodonCAGACC	1267	0.145638	0.0141275	0	0.000267327	7.75916e-11	1.29106e-05	49	0.41244	0.189688	0.042	0.876	0.0243576	0.853762	0.00176127	non-significant monotone/non-monotone	TRUE	FALSE	FALSE	FALSE	TRUE	TRUE	FALSE	FALSE
pcodonCAGACG	1267	0.120239	0.00928101	0.036	0.253	0.0235179	0.263066	58	0.451719	0.337321	0.004	0.999	0.000104205	0.996783	2.80572e-06	Monotone	FALSE	TRUE	FALSE	FALSE	FALSE	TRUE	FALSE	FALSE
pcodonCAGAAG	1267	0.108475	0.00986035	0.597	0.953	0.607831	0.948465	107	0.464059	0.36331	9.90099e-06	1	4.07589e-10	0.99998	6.4499e-12	MIC not significant	FALSE	TRUE	FALSE	FALSE	FALSE	TRUE	FALSE	FALSE
pcodonCAGAGC	1267	0.119384	0.0134688	0.024	0.547	0.0164615	0.566371	40	0.282251	0.098523	0.417	0.92	0.475713	0.893697	0.0490332	MIC not significant	FALSE	FALSE	FALSE	FALSE	FALSE	FALSE	FALSE	FALSE
pcodonCAGAGG	1267	0.117878	0.0104841	0.077	0.475	0.0718839	0.503986	67	0.498912	0.430176	0.000302632	0.999987	1.61895e-06	0.999991	1.95751e-09	MIC not significant	FALSE	TRUE	FALSE	FALSE	FALSE	TRUE	FALSE	FALSE
pcodonCAGGTC	1267	0.11582	0.0184331	0.096	0.958	0.0848189	0.944913	47	0.597684	0.360257	0.000381579	0.821868	7.18912e-07	0.814015	8.21494e-06	MIC not significant	FALSE	TRUE	FALSE	FALSE	FALSE	TRUE	FALSE	FALSE
pcodonCAGGTG	1267	0.104294	0.00365479	0.714	0.842	0.726543	0.85272	69	0.709882	0.498167	0	0.87696	7.97673e-22	0.861991	0	MIC not significant	FALSE	TRUE	FALSE	FALSE	FALSE	TRUE	FALSE	FALSE
pcodonCAGGCG	1267	0.121354	0.014128	0.022	0.426	0.0132269	0.45837	51	0.345543	0.280542	0.155287	1	0.16174	0.999931	6.42077e-05	MIC not significant	FALSE	FALSE	FALSE	FALSE	TRUE	FALSE	FALSE	FALSE
pcodonCAGGGT	1267	0.120478	0.0198907	0.046	0.84	0.0342958	0.84007	75	0.34648	0.269543	0.0328119	1	0.0176015	0.999972	2.60953e-06	Monotone	FALSE	TRUE	FALSE	FALSE	FALSE	TRUE	FALSE	FALSE
pcodonCAGGGA	1267	0.116671	0.0189256	0.092	0.932	0.0923645	0.929897	71	0.518694	0.232045	5.26316e-05	0.209276	7.57218e-09	0.228422	2.10807e-05	MIC not significant	FALSE	TRUE	FALSE	FALSE	FALSE	TRUE	FALSE	FALSE
pcodonCGTTTT	1267	0.125105	0.00971958	0.069	0.33	0.0568267	0.345061	156	0.34922	0.223821	0.000315789	0.999974	2.88676e-06	0.999811	4.47094e-10	MIC not significant	FALSE	TRUE	FALSE	FALSE	FALSE	TRUE	FALSE	FALSE
pcodonCGTTTC	1267	0.117701	0.00694003	0.094	0.326	0.0936649	0.337797	85	0.454403	0.288303	0.001	0.997	5.05257e-06	0.988224	1.17381e-07	MIC not significant	FALSE	TRUE	FALSE	FALSE	FALSE	TRUE	FALSE	FALSE
pcodonCGTTTA	1267	0.108852	0.00428489	0.578	0.759	0.6022	0.772892	112	0.376625	0.199454	0.00105263	0.97825	3.06511e-05	0.959228	7.98326e-07	MIC not significant	FALSE	TRUE	FALSE	FALSE	FALSE	TRUE	FALSE	FALSE
pcodonCGTTTG	1267	0.106268	0.00645484	0.818	0.954	0.806297	0.95031	145	0.411971	0.301353	0	1	1.27272e-12	0.99992	8.74428e-13	MIC not significant	FALSE	TRUE	FALSE	FALSE	FALSE	TRUE	FALSE	FALSE
pcodonCGTTCT	1267	0.119912	0.00721592	0.042	0.191	0.0319703	0.193418	61	0.347594	0.276452	0.0378289	0.999987	0.0221099	0.999846	1.35251e-05	Monotone	FALSE	FALSE	FALSE	FALSE	FALSE	TRUE	FALSE	FALSE
pcodonCGTTCC	1267	0.11035	0.00492505	0.288	0.536	0.302564	0.574311	46	0.391304	0.23141	0.025	0.943	0.00675417	0.906572	0.000713889	MIC not significant	FALSE	TRUE	FALSE	FALSE	FALSE	TRUE	FALSE	FALSE
pcodonCGTTCG	1267	0.130954	0.00902468	0.00165789	0.0232632	0.000388259	0.0158148	76	0.377538	0.337409	0.00816832	1	0.00150367	1	3.77808e-08	Monotone	TRUE	TRUE	FALSE	TRUE	TRUE	TRUE	FALSE	TRUE
pcodonCGTTAT	1267	0.129756	0.00978162	0.008	0.068	0.0026314	0.0645769	107	0.382146	0.233913	0.00147368	0.999605	7.83239e-05	0.997182	1.31206e-07	Monotone	TRUE	TRUE	FALSE	TRUE	TRUE	TRUE	FALSE	TRUE
pcodonCGTTAA	1267	0.103055	3.83891e-05	0.76	0.72	0.776218	0.735379	45	0.58457	0.43762	0.000144737	0.976434	2.09443e-09	0.949979	1.56958e-06	MIC not significant	FALSE	TRUE	FALSE	FALSE	FALSE	TRUE	FALSE	FALSE
pcodonCGTTAG	1267	0.103122	0.000473741	0.76	0.748	0.767148	0.753055	52	0.575218	0.29632	0.000184211	0.380171	6.87735e-08	0.426073	4.05515e-05	MIC not significant	FALSE	TRUE	FALSE	FALSE	FALSE	TRUE	FALSE	FALSE
pcodonCGTTGT	1267	0.101445	0.000837647	0.83	0.841	0.827424	0.832206	49	0.635631	0.431434	5.26316e-05	0.941066	2.71519e-09	0.916197	6.70502e-07	MIC not significant	FALSE	TRUE	FALSE	FALSE	FALSE	TRUE	FALSE	FALSE
pcodonCGTTGC	1267	0.127397	0.00266027	0.001	0.002	0.000300959	0.000832909	46	0.377128	0.320886	0.0259737	0.999921	0.010875	0.999533	4.06586e-05	Monotone	TRUE	TRUE	FALSE	TRUE	TRUE	TRUE	FALSE	TRUE
pcodonCGTTGA	1267	0.106695	0.00337861	0.576	0.711	0.602023	0.739389	76	0.394659	0.290152	0.00398684	0.999947	0.000361779	0.999541	5.18364e-07	MIC not significant	FALSE	TRUE	FALSE	FALSE	FALSE	TRUE	FALSE	FALSE
pcodonCGTTGG	1267	0.10219	0.00104192	0.84	0.856	0.845813	0.855034	84	0.377484	0.317066	0.0142178	1	0.00456546	1	4.43641e-08	MIC not significant	FALSE	TRUE	FALSE	FALSE	FALSE	TRUE	FALSE	FALSE
pcodonCGTCTT	1267	0.105953	0.00944196	0.735	0.985	0.755899	0.972617	123	0.343329	0.232391	0.00126316	0.999987	5.10074e-05	0.99982	1.64645e-08	MIC not significant	FALSE	TRUE	FALSE	FALSE	FALSE	TRUE	FALSE	FALSE
pcodonCGTCTA	1267	0.118539	0.00226597	0.074	0.094	0.0636697	0.0913392	76	0.486902	0.347221	6.57895e-05	0.998868	1.32676e-08	0.993593	4.16718e-08	MIC not significant	FALSE	TRUE	FALSE	FALSE	FALSE	TRUE	FALSE	FALSE
pcodonCGTCTG	1267	0.104707	0.00142833	0.678	0.72	0.694913	0.733964	44	0.681818	0.439322	3.94737e-05	0.422605	5.23807e-14	0.47073	9.49485e-07	MIC not significant	FALSE	TRUE	FALSE	FALSE	FALSE	TRUE	FALSE	FALSE
pcodonCGTCCT	1267	0.11242	0.0105339	0.298	0.849	0.332496	0.84517	94	0.339614	0.276646	0.0162871	1	0.00580874	0.999999	5.20833e-08	MIC not significant	FALSE	TRUE	FALSE	FALSE	FALSE	TRUE	FALSE	FALSE
pcodonCGTCCG	1267	0.130497	0.0139652	0.001	0.075	0.000166691	0.0609866	67	0.435831	0.277479	0.006	0.999	0.00032135	0.990692	4.66987e-06	Monotone	TRUE	TRUE	FALSE	TRUE	TRUE	TRUE	FALSE	TRUE
pcodonCGTCAG	1267	0.107176	0.0112706	0.473	0.987	0.511676	0.967263	44	0.41393	0.216217	0.01	0.763	0.00215073	0.765096	0.00147181	MIC not significant	FALSE	TRUE	FALSE	FALSE	FALSE	TRUE	FALSE	FALSE
pcodonCGTCGT	1267	0.116856	0.00268744	0.104	0.147	0.0850894	0.138796	66	0.422605	0.332546	0.00882895	0.999987	0.0016723	0.999943	4.03046e-07	MIC not significant	FALSE	TRUE	FALSE	FALSE	FALSE	TRUE	FALSE	FALSE
pcodonCGTCGA	1267	0.106276	0.00210088	0.547	0.613	0.574893	0.653359	56	0.259642	0.0877615	0.52	0.971	0.573167	0.943929	0.0266284	MIC not significant	FALSE	FALSE	FALSE	FALSE	FALSE	FALSE	FALSE	FALSE
pcodonCGTCGG	1267	0.111969	0.00754893	0.178	0.602	0.199101	0.629773	48	0.631113	0.403459	5.26316e-05	0.851684	1.01014e-08	0.837296	1.23741e-06	MIC not significant	FALSE	TRUE	FALSE	FALSE	FALSE	TRUE	FALSE	FALSE
pcodonCGTATT	1267	0.120447	0.0121515	0.171	0.738	0.194686	0.746797	189	0.362055	0.317409	1.9802e-05	1	6.04742e-11	1	3.19015e-17	MIC not significant	FALSE	TRUE	FALSE	FALSE	FALSE	TRUE	FALSE	FALSE
pcodonCGTATC	1267	0.133409	0.0256537	0.001	0.492	0.000217673	0.52233	90	0.457552	0.355182	0.000105263	0.999987	6.99458e-08	0.999926	5.75582e-10	Monotone	TRUE	TRUE	FALSE	TRUE	TRUE	TRUE	FALSE	TRUE
pcodonCGTATA	1267	0.102149	0.00403236	0.829	0.925	0.827556	0.921715	81	0.399113	0.438193	0.00131683	1	3.04141e-05	1	1.70991e-11	MIC not significant	FALSE	TRUE	FALSE	FALSE	FALSE	TRUE	FALSE	FALSE
pcodonCGTATG	1267	0.113743	0.00751763	0.409	0.735	0.412851	0.749412	134	0.391025	0.327473	7.92079e-05	1	5.641e-08	1	5.07762e-13	MIC not significant	FALSE	TRUE	FALSE	FALSE	FALSE	TRUE	FALSE	FALSE
pcodonCGTACT	1267	0.115373	0.00397284	0.105	0.219	0.112011	0.237683	69	0.448712	0.187249	0.002	0.449	7.67633e-05	0.492333	0.000204463	MIC not significant	FALSE	TRUE	FALSE	FALSE	FALSE	TRUE	FALSE	FALSE
pcodonCGTACC	1267	0.113462	0.00828319	0.129	0.57	0.142859	0.593026	49	0.393503	0.168234	0.051	0.859	0.0404059	0.845259	0.00342234	MIC not significant	FALSE	FALSE	FALSE	FALSE	FALSE	FALSE	FALSE	FALSE
pcodonCGTACG	1267	0.11414	0.0104352	0.194	0.679	0.169919	0.690992	71	0.378244	0.257934	0.023	0.999	0.0061121	0.999053	6.15624e-06	MIC not significant	FALSE	TRUE	FALSE	FALSE	FALSE	TRUE	FALSE	FALSE
pcodonCGTAAG	1267	0.118447	0.0131419	0.139	0.738	0.132681	0.740728	113	0.320015	0.160394	0.015	0.994	0.00970371	0.986621	1.10578e-05	MIC not significant	FALSE	TRUE	FALSE	FALSE	FALSE	TRUE	FALSE	FALSE
pcodonCGTAGT	1267	0.103509	0.00463461	0.758	0.935	0.766759	0.918817	47	0.464502	0.248225	0.019	0.912	0.00697074	0.889833	0.000365487	MIC not significant	FALSE	TRUE	FALSE	FALSE	FALSE	TRUE	FALSE	FALSE
pcodonCGTAGA	1267	0.0988641	0.00300765	0.954	0.988	0.934809	0.970873	40	0.484636	0.351718	0.003	0.993	0.000364231	0.984134	7.62785e-05	MIC not significant	FALSE	TRUE	FALSE	FALSE	FALSE	TRUE	FALSE	FALSE
pcodonCGTAGG	1267	0.111136	0.00484025	0.338	0.553	0.34142	0.582249	70	0.520298	0.435901	3.9604e-05	0.99999	1.43536e-08	0.999954	5.04405e-10	MIC not significant	FALSE	TRUE	FALSE	FALSE	FALSE	TRUE	FALSE	FALSE
pcodonCGTGTC	1267	0.102802	0.000337279	0.79	0.77	0.784553	0.764512	65	0.406078	0.356372	0.0185941	1	0.00682076	0.999999	1.53197e-07	MIC not significant	FALSE	TRUE	FALSE	FALSE	FALSE	TRUE	FALSE	FALSE
pcodonCGTGTG	1267	0.111336	0.000254454	0.287	0.267	0.306836	0.278184	74	0.419169	0.339639	0.00211842	0.999987	9.70605e-05	0.999958	5.10073e-08	MIC not significant	FALSE	TRUE	FALSE	FALSE	FALSE	TRUE	FALSE	FALSE
pcodonCGTGCT	1267	0.108042	0.0097343	0.469	0.908	0.494473	0.904722	70	0.438668	0.25268	0.003	0.973	0.00017513	0.948509	9.23139e-06	MIC not significant	FALSE	TRUE	FALSE	FALSE	FALSE	TRUE	FALSE	FALSE
pcodonCGTGCC	1267	0.12123	0.0150047	0.023	0.515	0.015347	0.54055	61	0.391147	0.153708	0.008	0.441	0.00110561	0.480203	0.00177901	non-significant monotone/non-monotone	FALSE	TRUE	FALSE	FALSE	FALSE	TRUE	FALSE	FALSE
pcodonCGTGCA	1267	0.100654	0.00454987	0.898	0.989	0.89256	0.974558	43	0.498389	0.328086	0.002	0.935	5.54025e-05	0.900928	8.05299e-05	MIC not significant	FALSE	TRUE	FALSE	FALSE	FALSE	TRUE	FALSE	FALSE
pcodonCGTGCG	1267	0.143295	0.0280215	1.31579e-05	0.162145	5.14906e-07	0.163676	93	0.301083	0.0798683	0.125	0.687	0.118039	0.716453	0.00605627	MIC not significant	TRUE	FALSE	FALSE	FALSE	TRUE	FALSE	FALSE	FALSE
pcodonCGTGAA	1267	0.108101	0.00233308	0.435	0.509	0.455261	0.551925	56	0.49334	0.277558	0.001	0.781	6.10653e-06	0.773884	3.02993e-05	MIC not significant	FALSE	TRUE	FALSE	FALSE	FALSE	TRUE	FALSE	FALSE
pcodonCGTGGT	1267	0.105872	0.00953912	0.696	0.974	0.716035	0.960902	113	0.403625	0.309176	0.000217822	1	4.6602e-07	0.99999	1.62142e-10	MIC not significant	FALSE	TRUE	FALSE	FALSE	FALSE	TRUE	FALSE	FALSE
pcodonCGTGGC	1267	0.104088	0.000812342	0.719	0.727	0.735859	0.740308	75	0.417334	0.325519	0.002	0.999	0.000129559	0.999725	9.09117e-08	MIC not significant	FALSE	TRUE	FALSE	FALSE	FALSE	TRUE	FALSE	FALSE
pcodonCGTGGA	1267	0.119886	0.0145158	0.117	0.759	0.117501	0.755854	119	0.32645	0.276585	0.00668317	1	0.00119159	1	8.14876e-10	MIC not significant	FALSE	TRUE	FALSE	FALSE	FALSE	TRUE	FALSE	FALSE
pcodonCGTGGG	1267	0.134953	0.00564196	0.000486842	0.00282895	9.1296e-05	0.001118	89	0.373201	0.305495	0.00740594	1	0.00146589	0.999999	1.95356e-08	Monotone	TRUE	TRUE	FALSE	TRUE	TRUE	TRUE	FALSE	TRUE
pcodonCGCTTT	1267	0.122565	2.43803e-05	0.013	0.008	0.00663655	0.00431541	46	0.442292	0.399979	0.003	0.999	0.00015164	0.999808	4.2078e-06	Monotone	TRUE	TRUE	FALSE	TRUE	TRUE	TRUE	FALSE	TRUE
pcodonCGCTTC	1267	0.11441	0.00648409	0.116	0.376	0.10362	0.400776	40	0.38015	0.198069	0.074	0.924	0.0644433	0.889803	0.00400792	MIC not significant	FALSE	FALSE	FALSE	FALSE	FALSE	FALSE	FALSE	FALSE
pcodonCGCTTG	1267	0.111936	0.00191683	0.208	0.261	0.209372	0.268778	44	0.409714	0.339169	0.0175526	0.999724	0.00449924	0.998968	4.69451e-05	MIC not significant	FALSE	TRUE	FALSE	FALSE	FALSE	TRUE	FALSE	FALSE
pcodonCGCATT	1267	0.108163	0.00348613	0.439	0.605	0.463755	0.635417	50	0.44	0.250312	0.019	0.962	0.00614565	0.943279	0.000260115	MIC not significant	FALSE	TRUE	FALSE	FALSE	FALSE	TRUE	FALSE	FALSE
pcodonCGCATG	1267	0.102069	1.086e-08	0.815	0.765	0.81445	0.777793	60	0.580146	0.46556	0	0.99903	3.71805e-12	0.996335	1.92965e-09	MIC not significant	FALSE	TRUE	FALSE	FALSE	FALSE	TRUE	FALSE	FALSE
pcodonCGCGGC	1267	0.110569	0.00261024	0.278	0.377	0.285704	0.403508	40	0.626866	0.372031	0.000144737	0.465066	1.0812e-08	0.515637	4.26283e-05	MIC not significant	FALSE	TRUE	FALSE	FALSE	FALSE	TRUE	FALSE	FALSE
pcodonCGCGGG	1267	0.108733	0.00129399	0.406	0.433	0.427455	0.461347	40	0.38015	0.114049	0.078	0.381	0.0541128	0.432007	0.033622	MIC not significant	FALSE	FALSE	FALSE	FALSE	FALSE	FALSE	FALSE	FALSE
pcodonCGATTT	1267	0.100726	0.000380966	0.94	0.937	0.937445	0.931109	135	0.434497	0.329802	0	1	2.72704e-12	0.999983	3.28305e-13	MIC not significant	FALSE	TRUE	FALSE	FALSE	FALSE	TRUE	FALSE	FALSE
pcodonCGATTC	1267	0.119883	0.00367153	0.061	0.12	0.0511966	0.110712	88	0.499666	0.307148	3.94737e-05	0.954276	5.88094e-10	0.932129	2.12213e-08	MIC not significant	FALSE	TRUE	FALSE	FALSE	FALSE	TRUE	FALSE	FALSE
pcodonCGATTA	1267	0.120399	0.00301842	0.067	0.104	0.0646296	0.111307	97	0.457642	0.378591	3.9604e-05	1	7.74696e-10	0.999993	2.00083e-11	MIC not significant	FALSE	TRUE	FALSE	FALSE	FALSE	TRUE	FALSE	FALSE
pcodonCGATTG	1267	0.115039	0.00608396	0.225	0.461	0.226834	0.498707	97	0.487188	0.41329	0	1	2.0353e-12	0.999996	1.25247e-12	MIC not significant	FALSE	TRUE	FALSE	FALSE	FALSE	TRUE	FALSE	FALSE
pcodonCGATAT	1267	0.110655	0.00206392	0.308	0.387	0.343112	0.418532	71	0.396448	0.343648	0.00921053	0.999987	0.00185655	0.999998	7.81795e-08	MIC not significant	FALSE	TRUE	FALSE	FALSE	FALSE	TRUE	FALSE	FALSE
pcodonCGATGC	1267	0.111901	0.00365321	0.22	0.38	0.239055	0.402361	52	0.295136	0.253556	0.399089	1	0.451396	0.999991	0.000173383	MIC not significant	FALSE	FALSE	FALSE	FALSE	FALSE	FALSE	FALSE	FALSE
pcodonCGATGG	1267	0.112005	0.00283059	0.266	0.379	0.278102	0.389124	78	0.506423	0.354933	2.63158e-05	0.995039	1.19949e-10	0.982851	8.71799e-09	MIC not significant	FALSE	TRUE	FALSE	FALSE	FALSE	TRUE	FALSE	FALSE
pcodonCGACTT	1267	0.112262	0.00608195	0.296	0.585	0.304773	0.600609	89	0.424673	0.337596	0.000732673	1	7.47483e-06	0.999984	2.37939e-09	MIC not significant	FALSE	TRUE	FALSE	FALSE	FALSE	TRUE	FALSE	FALSE
pcodonCGACTG	1267	0.10163	0.00598939	0.83	0.99	0.832317	0.970308	46	0.50674	0.265259	0.000868421	0.365105	1.41928e-06	0.416119	0.000249867	MIC not significant	FALSE	TRUE	FALSE	FALSE	FALSE	TRUE	FALSE	FALSE
pcodonCGACCT	1267	0.116128	0.00228351	0.07	0.104	0.0648413	0.101973	47	0.493959	0.248629	0.007	0.754	0.000745523	0.764937	0.000360845	MIC not significant	FALSE	TRUE	FALSE	FALSE	FALSE	TRUE	FALSE	FALSE
pcodonCGACGT	1267	0.107779	0.0023327	0.482	0.581	0.498194	0.595532	59	0.611548	0.391386	0	0.665743	1.43298e-13	0.688167	1.17152e-07	MIC not significant	FALSE	TRUE	FALSE	FALSE	FALSE	TRUE	FALSE	FALSE
pcodonCGAATT	1267	0.123221	0.0144357	0.1	0.667	0.0915608	0.685581	165	0.359601	0.333494	3.9604e-05	1	1.13159e-08	1	4.66209e-16	MIC not significant	FALSE	TRUE	FALSE	FALSE	FALSE	TRUE	FALSE	FALSE
pcodonCGAATC	1267	0.113893	0.00456897	0.2	0.394	0.201839	0.397992	79	0.503481	0.46252	0	1	7.51179e-11	0.999999	5.46397e-12	MIC not significant	FALSE	TRUE	FALSE	FALSE	FALSE	TRUE	FALSE	FALSE
pcodonCGAATA	1267	0.119037	0.00549006	0.071	0.182	0.0625124	0.192763	78	0.388087	0.270665	0.00384211	0.999776	0.00032429	0.998563	1.05001e-06	MIC not significant	FALSE	TRUE	FALSE	FALSE	FALSE	TRUE	FALSE	FALSE
pcodonCGAATG	1267	0.118308	0.00367936	0.139	0.244	0.142397	0.252408	118	0.356939	0.322301	0.00133663	1	4.66479e-05	1	2.02926e-11	MIC not significant	FALSE	TRUE	FALSE	FALSE	FALSE	TRUE	FALSE	FALSE
pcodonCGAACT	1267	0.104563	0.000132677	0.664	0.619	0.681279	0.643024	48	0.409922	0.281119	0.0513026	0.999342	0.0358413	0.996649	0.0001062	MIC not significant	FALSE	FALSE	FALSE	FALSE	FALSE	FALSE	FALSE	FALSE
pcodonCGAACC	1267	0.110131	0.00758642	0.288	0.736	0.329212	0.750072	48	0.456221	0.299688	0.014	0.995	0.00558537	0.987714	7.43654e-05	MIC not significant	FALSE	TRUE	FALSE	FALSE	FALSE	TRUE	FALSE	FALSE
pcodonCGAACA	1267	0.10262	0.00124584	0.822	0.846	0.815931	0.839846	40	0.789828	0.488733	9.90099e-06	0.204475	6.68986e-17	0.226848	5.22671e-07	MIC not significant	FALSE	TRUE	FALSE	FALSE	FALSE	TRUE	FALSE	FALSE
pcodonCGAACG	1267	0.116553	0.00882098	0.109	0.481	0.103806	0.488871	73	0.523975	0.366008	3.94737e-05	0.994947	6.4933e-10	0.98326	1.43629e-08	MIC not significant	FALSE	TRUE	FALSE	FALSE	FALSE	TRUE	FALSE	FALSE
pcodonCGAAAG	1267	0.126494	0.0147803	0.008	0.272	0.00470129	0.285115	82	0.413387	0.300606	0.00410526	0.999987	0.000455286	0.999871	9.71286e-08	Monotone	TRUE	TRUE	FALSE	TRUE	TRUE	TRUE	FALSE	TRUE
pcodonCGAAGG	1267	0.111618	0.00262864	0.238	0.335	0.257273	0.357948	55	0.535137	0.368342	0.000276316	0.982079	2.02733e-07	0.96171	9.01036e-07	MIC not significant	FALSE	TRUE	FALSE	FALSE	FALSE	TRUE	FALSE	FALSE
pcodonCGAGTC	1267	0.113365	0.00095795	0.151	0.148	0.148313	0.150022	41	0.396184	0.176445	0.044	0.677	0.0239029	0.693975	0.00625271	MIC not significant	FALSE	FALSE	FALSE	FALSE	FALSE	TRUE	FALSE	FALSE
pcodonCGAGTG	1267	0.100998	0.00053826	0.857	0.851	0.856357	0.850226	50	0.466159	0.30762	0.005	0.993	0.000732861	0.985327	2.92098e-05	MIC not significant	FALSE	TRUE	FALSE	FALSE	FALSE	TRUE	FALSE	FALSE
pcodonCGAGGT	1267	0.109559	0.00187736	0.376	0.444	0.402081	0.470042	73	0.468934	0.430453	0.000326733	1	8.45296e-07	1	2.96186e-10	MIC not significant	FALSE	TRUE	FALSE	FALSE	FALSE	TRUE	FALSE	FALSE
pcodonCGAGGC	1267	0.112923	0.00569882	0.198	0.447	0.183665	0.460661	54	0.370914	0.107432	0.065	0.423	0.0396775	0.472428	0.015921	MIC not significant	FALSE	FALSE	FALSE	FALSE	FALSE	FALSE	FALSE	FALSE
pcodonCGAGGA	1267	0.10634	0.00147856	0.56	0.617	0.601156	0.641869	77	0.442158	0.252118	0.001	0.908	1.13515e-06	0.888572	3.2773e-06	MIC not significant	FALSE	TRUE	FALSE	FALSE	FALSE	TRUE	FALSE	FALSE
pcodonCGAGGG	1267	0.105795	0.00151298	0.604	0.662	0.626496	0.669055	49	0.4937	0.332287	0.001	0.993	0.000205941	0.982044	1.46002e-05	MIC not significant	FALSE	TRUE	FALSE	FALSE	FALSE	TRUE	FALSE	FALSE
pcodonCGGTTT	1267	0.112951	0.000382529	0.206	0.184	0.20881	0.189278	58	0.325098	0.211496	0.111	0.999	0.103467	0.99697	0.000281347	MIC not significant	FALSE	FALSE	FALSE	FALSE	FALSE	FALSE	FALSE	FALSE
pcodonCGGTTC	1267	0.117215	0.00764111	0.068	0.301	0.0531034	0.317368	51	0.408432	0.242723	0.036	0.99	0.0144355	0.976724	0.000286839	MIC not significant	FALSE	FALSE	FALSE	FALSE	FALSE	TRUE	FALSE	FALSE
pcodonCGGTTA	1267	0.106785	0.000552306	0.526	0.498	0.541433	0.526428	42	0.443413	0.0255616	0.009	0.006	0.00124527	0.00124332	0.311827	MIC not significant	FALSE	TRUE	FALSE	FALSE	FALSE	TRUE	FALSE	FALSE
pcodonCGGTTG	1267	0.111125	0.00460602	0.266	0.512	0.27823	0.52884	43	0.311442	0.157018	0.214	0.97	0.243724	0.93652	0.00894735	MIC not significant	FALSE	FALSE	FALSE	FALSE	FALSE	FALSE	FALSE	FALSE
pcodonCGGTCG	1267	0.108205	0.000116576	0.425	0.37	0.443647	0.389671	40	0.370335	0.350771	0.0843816	0.999987	0.0722657	0.999956	5.67526e-05	MIC not significant	FALSE	FALSE	FALSE	FALSE	FALSE	FALSE	FALSE	FALSE
pcodonCGGTGC	1267	0.0967411	1.26623e-06	0.976	0.969	0.960383	0.949038	55	0.467111	0.314603	0.007	0.997	0.000125283	0.981103	1.21196e-05	MIC not significant	FALSE	TRUE	FALSE	FALSE	FALSE	TRUE	FALSE	FALSE
pcodonCGGTGG	1267	0.117854	0.0022095	0.073	0.109	0.0715124	0.104526	72	0.41545	0.318381	0.00411842	0.999961	0.000321689	0.999823	2.44468e-07	MIC not significant	FALSE	TRUE	FALSE	FALSE	FALSE	TRUE	FALSE	FALSE
pcodonCGGCTT	1267	0.104309	0.00515147	0.764	0.93	0.771581	0.913959	99	0.490421	0.388253	0	0.99999	3.01498e-13	0.999847	5.68768e-12	MIC not significant	FALSE	TRUE	FALSE	FALSE	FALSE	TRUE	FALSE	FALSE
pcodonCGGCTG	1267	0.107118	0.000712498	0.512	0.496	0.547532	0.540277	46	0.411623	0.328335	0.0113421	0.999355	0.00170172	0.997437	3.15751e-05	MIC not significant	FALSE	TRUE	FALSE	FALSE	FALSE	TRUE	FALSE	FALSE
pcodonCGGCCT	1267	0.110618	0.00812196	0.356	0.784	0.376398	0.785622	76	0.464913	0.427822	0.000257426	1	2.39911e-07	1	0	MIC not significant	FALSE	TRUE	FALSE	FALSE	FALSE	TRUE	FALSE	FALSE
pcodonCGGCCG	1267	0.118599	0.0077693	0.038	0.228	0.0297841	0.227694	51	0.375883	0.236378	0.07	0.999	0.0560477	0.989825	0.000297941	MIC not significant	FALSE	FALSE	FALSE	FALSE	FALSE	FALSE	FALSE	FALSE
pcodonCGGATT	1267	0.122274	0.00972945	0.069	0.379	0.0707178	0.395132	125	0.456236	0.312231	0	0.999921	2.09788e-11	0.998922	1.27122e-11	MIC not significant	FALSE	TRUE	FALSE	FALSE	FALSE	TRUE	FALSE	FALSE
pcodonCGGATC	1267	0.114896	0.0141844	0.158	0.828	0.147137	0.83666	69	0.448878	0.316612	0.00177632	0.999711	6.28193e-05	0.997794	4.84933e-07	MIC not significant	FALSE	TRUE	FALSE	FALSE	FALSE	TRUE	FALSE	FALSE
pcodonCGGATA	1267	0.118922	0.00409148	0.027	0.082	0.0233852	0.075634	42	0.514596	0.356547	0.003	0.967	3.28125e-05	0.93952	4.26624e-05	Monotone	FALSE	TRUE	FALSE	FALSE	FALSE	TRUE	FALSE	FALSE
pcodonCGGATG	1267	0.119485	0.00299896	0.175	0.25	0.167389	0.247821	136	0.490105	0.365054	0	0.99998	2.91294e-19	0.999706	6.82917e-15	MIC not significant	FALSE	TRUE	FALSE	FALSE	FALSE	TRUE	FALSE	FALSE
pcodonCGGACT	1267	0.100298	0.00210443	0.881	0.931	0.881357	0.918659	57	0.447606	0.276788	0.002	0.978	0.000153935	0.953012	2.63297e-05	MIC not significant	FALSE	TRUE	FALSE	FALSE	FALSE	TRUE	FALSE	FALSE
pcodonCGGACC	1267	0.123525	0.00105853	0.008	0.011	0.00455473	0.00481393	52	0.480218	0.301092	0.009	0.981	0.000413131	0.951448	2.5339e-05	Monotone	TRUE	TRUE	FALSE	TRUE	TRUE	TRUE	FALSE	FALSE
pcodonCGGACG	1267	0.122738	0.00935158	0.033	0.247	0.0268591	0.24215	90	0.418048	0.377486	0.000782178	1	1.01481e-05	1	1.18837e-10	Monotone	FALSE	TRUE	FALSE	FALSE	FALSE	TRUE	FALSE	FALSE
pcodonCGGAAT	1267	0.102282	0.00460108	0.824	0.966	0.826847	0.94837	42	0.559683	0.351532	0.000513158	0.755276	6.16657e-07	0.757702	4.9532e-05	MIC not significant	FALSE	TRUE	FALSE	FALSE	FALSE	TRUE	FALSE	FALSE
pcodonCGGAAG	1267	0.115829	0.00525484	0.174	0.367	0.17432	0.39092	94	0.431212	0.398141	0.000227723	1	3.11744e-07	1	9.30872e-12	MIC not significant	FALSE	TRUE	FALSE	FALSE	FALSE	TRUE	FALSE	FALSE
pcodonCGGAGC	1267	0.103339	0.00574788	0.732	0.947	0.748188	0.928318	54	0.459251	0.41808	0.00423762	1	0.000297488	0.999989	1.27963e-07	MIC not significant	FALSE	TRUE	FALSE	FALSE	FALSE	TRUE	FALSE	FALSE
pcodonCGGAGA	1267	0.12104	0.00208769	0.021	0.032	0.0116056	0.0198824	47	0.440327	0.265333	0.037	0.992	0.0166144	0.974901	0.00021152	Monotone	FALSE	FALSE	FALSE	FALSE	TRUE	TRUE	FALSE	TRUE
pcodonCGGAGG	1267	0.126358	0.00540435	0.006	0.032	0.00419784	0.0246121	78	0.354898	0.247594	0.01475	0.999868	0.00457208	0.999299	3.57169e-06	Monotone	TRUE	TRUE	FALSE	TRUE	TRUE	TRUE	FALSE	TRUE
pcodonCGGGTC	1267	0.103742	0.00400233	0.757	0.903	0.776198	0.894728	81	0.328117	0.282536	0.0284257	1	0.0141344	0.999999	3.29321e-07	MIC not significant	FALSE	TRUE	FALSE	FALSE	FALSE	TRUE	FALSE	FALSE
pcodonCGGGTG	1267	0.11706	0.00661847	0.122	0.342	0.112313	0.352503	79	0.464937	0.285187	9.21053e-05	0.935842	2.1969e-08	0.913046	4.01132e-07	MIC not significant	FALSE	TRUE	FALSE	FALSE	FALSE	TRUE	FALSE	FALSE
pcodonCGGGCT	1267	0.100678	0.00363063	0.878	0.95	0.867206	0.939719	76	0.362524	0.299751	0.0152475	1	0.00480945	0.999993	3.08564e-07	MIC not significant	FALSE	TRUE	FALSE	FALSE	FALSE	TRUE	FALSE	FALSE
pcodonCGGGCC	1267	0.122516	0.00713742	0.026	0.137	0.0202223	0.130054	84	0.414834	0.349585	0.00237624	1	0.000179484	0.999999	3.18855e-09	Monotone	FALSE	TRUE	FALSE	FALSE	FALSE	TRUE	FALSE	FALSE
pcodonCGGGCA	1267	0.109027	0.000426559	0.379	0.351	0.411019	0.382117	40	0.560444	0.429972	0.001	0.991	7.85831e-06	0.97894	7.6268e-06	MIC not significant	FALSE	TRUE	FALSE	FALSE	FALSE	TRUE	FALSE	FALSE
pcodonCGGGCG	1267	0.107011	0.00782708	0.627	0.937	0.665743	0.923201	104	0.304418	0.232725	0.101921	1	0.0966686	1	2.15186e-07	MIC not significant	FALSE	FALSE	FALSE	FALSE	FALSE	FALSE	FALSE	FALSE
pcodonCGGGGT	1267	0.110842	0.00888954	0.515	0.891	0.527229	0.892093	129	0.472756	0.454975	0	1	1.67986e-14	1	1.8997e-18	MIC not significant	FALSE	TRUE	FALSE	FALSE	FALSE	TRUE	FALSE	FALSE
pcodonCGGGGC	1267	0.112087	0.00455721	0.432	0.629	0.428416	0.641063	120	0.39042	0.214241	9.21053e-05	0.948632	1.23021e-07	0.927993	1.02166e-07	MIC not significant	FALSE	TRUE	FALSE	FALSE	FALSE	TRUE	FALSE	FALSE
pcodonCGGGGA	1267	0.156175	0.0102659	0	9.90099e-06	4.66779e-10	6.54072e-07	138	0.280555	0.200049	0.0489703	1	0.036457	1	3.80467e-08	Monotone	TRUE	FALSE	FALSE	FALSE	TRUE	FALSE	FALSE	FALSE
pcodonCGGGGG	1267	0.0992346	0.000397655	0.928	0.924	0.909606	0.903014	74	0.38208	0.235682	0.011	0.996	0.00218291	0.992291	1.16445e-05	MIC not significant	FALSE	TRUE	FALSE	FALSE	FALSE	TRUE	FALSE	FALSE
pcodonATTTTT	1267	0.156128	0.0159621	2.63158e-05	0.00432895	5.25142e-07	0.00210922	487	0.231292	0.166362	2.9703e-05	1	4.32706e-08	1	6.03999e-21	Monotone	TRUE	TRUE	FALSE	TRUE	TRUE	TRUE	FALSE	TRUE
pcodonATTTTC	1267	0.142993	0.0183598	0.002	0.172	0.000430751	0.165865	355	0.321384	0.150786	0	0.520812	8.05615e-22	0.547582	3.18746e-14	non-significant monotone/non-monotone	TRUE	TRUE	FALSE	FALSE	TRUE	TRUE	FALSE	FALSE
pcodonATTTTA	1267	0.144044	0.0168728	0.003	0.134	0.000545508	0.13108	475	0.25347	0.161031	0	1	9.24352e-12	1	8.35832e-20	Monotone	TRUE	TRUE	FALSE	TRUE	TRUE	TRUE	FALSE	TRUE
pcodonATTTTG	1267	0.161969	0.0114601	0	6.93069e-05	5.7695e-09	8.68534e-06	448	0.29582	0.188166	0	1	2.67129e-22	0.999992	5.58307e-22	Monotone	TRUE	TRUE	FALSE	TRUE	TRUE	TRUE	FALSE	TRUE
pcodonATTTCT	1267	0.121014	0.024108	0.192	0.994	0.1962	0.989005	203	0.320383	0.213509	0.000247525	1	2.19489e-06	0.999998	3.93339e-12	MIC not significant	FALSE	TRUE	FALSE	FALSE	FALSE	TRUE	FALSE	FALSE
pcodonATTTCC	1267	0.151364	0.0365146	0	0.338356	6.88429e-08	0.352332	160	0.338297	0.243611	0.000366337	1	5.84824e-06	0.999999	3.322e-11	Monotone	TRUE	TRUE	FALSE	TRUE	TRUE	TRUE	FALSE	TRUE
pcodonATTTCA	1267	0.122196	0.010826	0.068	0.421	0.0595869	0.448447	127	0.370687	0.290968	0.00090099	1	2.57946e-05	1	6.01654e-11	MIC not significant	FALSE	TRUE	FALSE	FALSE	FALSE	TRUE	FALSE	FALSE
pcodonATTTCG	1267	0.143839	0.0242171	0.000815789	0.326461	0.000182798	0.337932	304	0.309875	0.161615	0	0.993475	7.96747e-13	0.983466	3.09162e-13	Monotone	TRUE	TRUE	FALSE	TRUE	TRUE	TRUE	FALSE	TRUE
pcodonATTTAT	1267	0.149291	0.0201106	0.000184211	0.0613816	1.45029e-05	0.0556882	356	0.327345	0.234092	0	1	1.72955e-23	1	2.74004e-22	Monotone	TRUE	TRUE	FALSE	TRUE	TRUE	TRUE	FALSE	TRUE
pcodonATTTAC	1267	0.107549	0.00161884	0.764	0.803	0.75695	0.794257	149	0.414524	0.29506	2.9703e-05	1	7.65981e-11	0.999959	8.22363e-13	MIC not significant	FALSE	TRUE	FALSE	FALSE	FALSE	TRUE	FALSE	FALSE
pcodonATTTAA	1267	0.113357	0.00494479	0.392	0.616	0.405532	0.631971	134	0.354117	0.242401	0.000881188	1	2.69997e-05	0.999958	1.52035e-09	MIC not significant	FALSE	TRUE	FALSE	FALSE	FALSE	TRUE	FALSE	FALSE
pcodonATTTAG	1267	0.11991	0.0107874	0.247	0.757	0.258518	0.75749	215	0.407761	0.359384	0	1	3.19988e-21	1	2.28343e-22	MIC not significant	FALSE	TRUE	FALSE	FALSE	FALSE	TRUE	FALSE	FALSE
pcodonATTTGT	1267	0.119774	0.00127904	0.249	0.273	0.258644	0.278269	219	0.415557	0.316731	0	1	8.49419e-24	0.999999	1.07625e-19	MIC not significant	FALSE	TRUE	FALSE	FALSE	FALSE	TRUE	FALSE	FALSE
pcodonATTTGC	1267	0.156788	0.0357293	0	0.210386	1.87338e-08	0.216004	247	0.312981	0.171808	3.94737e-05	0.999447	1.90299e-09	0.996007	1.12806e-11	Monotone	TRUE	TRUE	FALSE	TRUE	TRUE	TRUE	FALSE	TRUE
pcodonATTTGA	1267	0.136638	0.0257212	0.01	0.712	0.00437617	0.722354	263	0.307762	0.184886	9.90099e-06	1	9.29416e-09	0.999941	2.9292e-13	Monotone	TRUE	TRUE	FALSE	TRUE	TRUE	TRUE	FALSE	TRUE
pcodonATTTGG	1267	0.149419	0.0182323	0.000210526	0.0456053	2.0857e-05	0.0388022	405	0.327799	0.176077	0	0.934327	2.69907e-27	0.920569	1.05296e-18	non-significant monotone/non-monotone	TRUE	TRUE	FALSE	FALSE	TRUE	TRUE	FALSE	FALSE
pcodonATTCTT	1267	0.141415	0.0234463	0.002	0.437	0.000467657	0.446415	349	0.237218	0.131034	0.000811881	1	6.03192e-05	0.999995	3.03289e-12	Monotone	TRUE	TRUE	FALSE	TRUE	TRUE	TRUE	FALSE	TRUE
pcodonATTCTC	1267	0.115909	0.00668505	0.158	0.425	0.173317	0.457944	89	0.39626	0.263921	0.001	0.999	0.000149137	0.998579	2.62246e-07	MIC not significant	FALSE	TRUE	FALSE	FALSE	FALSE	TRUE	FALSE	FALSE
pcodonATTCTA	1267	0.105433	0.00524656	0.88	0.966	0.863078	0.953835	176	0.365173	0.213641	6.57895e-05	0.999658	1.12788e-08	0.996889	1.06303e-10	MIC not significant	FALSE	TRUE	FALSE	FALSE	FALSE	TRUE	FALSE	FALSE
pcodonATTCTG	1267	0.126392	0.0186294	0.038	0.678	0.030667	0.6863	151	0.402748	0.286083	0	1	5.15806e-10	0.999967	1.5005e-12	Monotone	FALSE	TRUE	FALSE	FALSE	FALSE	TRUE	FALSE	FALSE
pcodonATTCCT	1267	0.146625	0.0373758	2.63158e-05	0.659263	3.28249e-06	0.671854	170	0.349569	0.217504	2.63158e-05	0.999816	1.34199e-08	0.99869	1.45759e-10	Monotone	TRUE	TRUE	FALSE	TRUE	TRUE	TRUE	FALSE	TRUE
pcodonATTCCC	1267	0.118326	0.0034863	0.047	0.091	0.0331306	0.083369	48	0.30998	0.116333	0.42	0.963	0.461364	0.936347	0.018117	MIC not significant	FALSE	FALSE	FALSE	FALSE	FALSE	FALSE	FALSE	FALSE
pcodonATTCCA	1267	0.122754	0.0013059	0.011	0.012	0.00584974	0.0068174	47	0.406793	0.227739	0.055	0.991	0.0464049	0.971367	0.000797886	MIC not significant	TRUE	FALSE	FALSE	FALSE	TRUE	FALSE	FALSE	FALSE
pcodonATTCCG	1267	0.131363	0.02901	0.014	0.928	0.00702651	0.92326	165	0.340447	0.195003	0.000131579	0.999197	7.10423e-07	0.995677	2.89822e-09	Monotone	FALSE	TRUE	FALSE	FALSE	TRUE	TRUE	FALSE	TRUE
pcodonATTCAG	1267	0.121153	0.0247873	0.079	0.982	0.0689867	0.970976	112	0.432876	0.292454	2.63158e-05	0.999776	5.52251e-09	0.998062	7.49532e-10	MIC not significant	FALSE	TRUE	FALSE	FALSE	FALSE	TRUE	FALSE	FALSE
pcodonATTCGT	1267	0.134528	0.0302272	0.007	0.907	0.00275249	0.893351	193	0.317605	0.24513	0.000188119	1	9.75224e-07	1	2.49039e-13	Monotone	TRUE	TRUE	FALSE	TRUE	TRUE	TRUE	FALSE	TRUE
pcodonATTCGC	1267	0.109075	0.00622154	0.383	0.729	0.396553	0.74439	46	0.432882	0.282671	0.007	0.962	0.000639668	0.929383	0.000179853	MIC not significant	FALSE	TRUE	FALSE	FALSE	FALSE	TRUE	FALSE	FALSE
pcodonATTCGA	1267	0.116056	0.00813907	0.294	0.699	0.310906	0.711224	148	0.403487	0.308443	9.90099e-06	1	1.76668e-09	0.999999	2.37422e-13	MIC not significant	FALSE	TRUE	FALSE	FALSE	FALSE	TRUE	FALSE	FALSE
pcodonATTCGG	1267	0.11096	0.00541376	0.515	0.764	0.534901	0.767171	131	0.311341	0.231745	0.0187228	1	0.00840777	1	5.86161e-09	MIC not significant	FALSE	TRUE	FALSE	FALSE	FALSE	TRUE	FALSE	FALSE
pcodonATTATT	1267	0.148034	0.0128756	0.000460526	0.0229737	9.30002e-05	0.0170339	628	0.198081	0.0916487	0.000148515	1	2.14316e-06	0.999947	8.89755e-15	Monotone	TRUE	TRUE	FALSE	TRUE	TRUE	TRUE	FALSE	TRUE
pcodonATTATC	1267	0.139992	0.0202346	0.004	0.341	0.00127028	0.353806	332	0.288048	0.151425	0	0.999693	1.29089e-10	0.997513	1.90143e-13	Monotone	TRUE	TRUE	FALSE	TRUE	TRUE	TRUE	FALSE	TRUE
pcodonATTATA	1267	0.129368	0.00400291	0.053	0.12	0.0580469	0.126881	325	0.324782	0.249443	0	1	1.32128e-16	1	6.59197e-22	MIC not significant	FALSE	TRUE	FALSE	FALSE	FALSE	TRUE	FALSE	FALSE
pcodonATTATG	1267	0.140865	0.00849282	0.006	0.041	0.00304477	0.0424708	512	0.247943	0.183886	0	1	2.8931e-12	1	2.5614e-24	Monotone	TRUE	TRUE	FALSE	TRUE	TRUE	TRUE	FALSE	TRUE
pcodonATTACT	1267	0.135373	0.0169331	0.006	0.261	0.0030457	0.279722	206	0.33761	0.291988	2.9703e-05	1	1.89846e-08	1	5.16524e-17	Monotone	TRUE	TRUE	FALSE	TRUE	TRUE	TRUE	FALSE	TRUE
pcodonATTACC	1267	0.153276	0.0332243	9.90099e-06	0.21695	1.36551e-07	0.223004	221	0.35237	0.222784	0	0.99998	3.47609e-13	0.999302	1.16141e-13	Monotone	TRUE	TRUE	FALSE	TRUE	TRUE	TRUE	FALSE	TRUE
pcodonATTACA	1267	0.115417	0.00412803	0.163	0.307	0.171181	0.323853	87	0.415553	0.213736	0.002	0.931	5.07624e-05	0.907487	6.54488e-06	MIC not significant	FALSE	TRUE	FALSE	FALSE	FALSE	TRUE	FALSE	FALSE
pcodonATTACG	1267	0.165041	0.0372137	0	0.0780396	1.02189e-10	0.0728088	334	0.25491	0.144422	0.00039604	1	7.30262e-06	0.999995	6.44079e-13	Monotone	TRUE	TRUE	FALSE	TRUE	TRUE	TRUE	FALSE	TRUE
pcodonATTAAT	1267	0.112249	0.00072837	0.44	0.43	0.457397	0.453055	123	0.432724	0.390371	9.90099e-06	1	6.31063e-12	1	1.13505e-14	MIC not significant	FALSE	TRUE	FALSE	FALSE	FALSE	TRUE	FALSE	FALSE
pcodonATTAAC	1267	0.108457	0.00630307	0.621	0.889	0.642255	0.87988	119	0.289264	0.22008	0.0487624	1	0.0349605	1	7.38701e-08	MIC not significant	FALSE	FALSE	FALSE	FALSE	FALSE	TRUE	FALSE	FALSE
pcodonATTAAA	1267	0.111773	0.00774698	0.269	0.667	0.279892	0.680708	71	0.501206	0.310857	0.000144737	0.953342	8.68736e-08	0.928982	7.14359e-07	MIC not significant	FALSE	TRUE	FALSE	FALSE	FALSE	TRUE	FALSE	FALSE
pcodonATTAAG	1267	0.168583	0.0471207	0	0.277257	7.15023e-12	0.287856	349	0.247631	0.101952	0.000210526	0.983763	3.44121e-06	0.970322	1.0336e-09	Monotone	TRUE	TRUE	FALSE	TRUE	TRUE	TRUE	FALSE	TRUE
pcodonATTAGT	1267	0.102576	0.000998303	0.917	0.92	0.917731	0.923923	164	0.463222	0.356516	0	1	6.87165e-22	0.999986	3.21643e-17	MIC not significant	FALSE	TRUE	FALSE	FALSE	FALSE	TRUE	FALSE	FALSE
pcodonATTAGC	1267	0.131172	0.0193621	0.01	0.49	0.00556893	0.510613	166	0.402987	0.32126	0	1	9.97927e-14	1	1.71688e-15	Monotone	TRUE	TRUE	FALSE	TRUE	TRUE	TRUE	FALSE	TRUE
pcodonATTAGA	1267	0.106931	0.00278909	0.83	0.894	0.830153	0.890855	178	0.361845	0.288506	9.90099e-06	1	7.63988e-09	1	1.08083e-14	MIC not significant	FALSE	TRUE	FALSE	FALSE	FALSE	TRUE	FALSE	FALSE
pcodonATTAGG	1267	0.164351	0.0268961	0	0.00569307	1.89797e-10	0.00281429	327	0.301187	0.228433	0	1	3.69967e-12	1	4.57174e-20	Monotone	TRUE	TRUE	FALSE	TRUE	TRUE	TRUE	FALSE	TRUE
pcodonATTGTC	1267	0.135052	0.0220625	0.005	0.557	0.0049758	0.577933	210	0.288399	0.141303	0.00206579	0.999408	0.000209271	0.995892	1.88329e-08	Monotone	TRUE	TRUE	FALSE	TRUE	TRUE	TRUE	FALSE	TRUE
pcodonATTGTG	1267	0.131343	0.0198124	0.027	0.68	0.0183364	0.682708	236	0.304924	0.212601	5.94059e-05	1	4.82341e-07	1	7.96703e-14	Monotone	FALSE	TRUE	FALSE	FALSE	FALSE	TRUE	FALSE	FALSE
pcodonATTGCT	1267	0.120034	0.00965315	0.148	0.554	0.148858	0.568463	161	0.418377	0.352452	0	1	3.20163e-14	1	1.04304e-16	MIC not significant	FALSE	TRUE	FALSE	FALSE	FALSE	TRUE	FALSE	FALSE
pcodonATTGCC	1267	0.119474	0.0135128	0.18	0.805	0.17414	0.801142	158	0.321075	0.177969	0.003	0.999	0.000168821	0.997799	3.37994e-08	MIC not significant	FALSE	TRUE	FALSE	FALSE	FALSE	TRUE	FALSE	FALSE
pcodonATTGCA	1267	0.108384	0.00378994	0.542	0.718	0.55213	0.713867	88	0.374617	0.257682	0.00802632	0.999987	0.00170265	0.999708	4.4672e-07	MIC not significant	FALSE	TRUE	FALSE	FALSE	FALSE	TRUE	FALSE	FALSE
pcodonATTGCG	1267	0.151689	0.0391695	5.26316e-05	0.64925	1.06668e-06	0.662126	262	0.2886	0.134642	0.000263158	0.995684	2.48467e-06	0.987268	9.01254e-10	Monotone	TRUE	TRUE	FALSE	TRUE	TRUE	TRUE	FALSE	TRUE
pcodonATTGAC	1267	0.104936	2.6529e-06	0.664	0.617	0.689587	0.646597	47	0.337348	0.170788	0.268	0.991	0.324982	0.977304	0.00388691	MIC not significant	FALSE	FALSE	FALSE	FALSE	FALSE	FALSE	FALSE	FALSE
pcodonATTGAA	1267	0.115092	0.0109407	0.313	0.855	0.351916	0.844626	143	0.375995	0.223681	7.89474e-05	0.99725	1.57403e-08	0.988903	2.45253e-09	MIC not significant	FALSE	TRUE	FALSE	FALSE	FALSE	TRUE	FALSE	FALSE
pcodonATTGAG	1267	0.118426	0.0120202	0.122	0.641	0.131667	0.664408	112	0.370563	0.158305	0.002	0.742	8.42543e-05	0.747163	1.39761e-05	MIC not significant	FALSE	TRUE	FALSE	FALSE	FALSE	TRUE	FALSE	FALSE
pcodonATTGGT	1267	0.156638	0.039908	2.63158e-05	0.497829	9.49997e-08	0.513952	327	0.293832	0.18172	0	1	7.32328e-11	0.999994	7.19005e-16	Monotone	TRUE	TRUE	FALSE	TRUE	TRUE	TRUE	FALSE	TRUE
pcodonATTGGC	1267	0.144963	0.0215191	0.000131579	0.09375	1.78988e-05	0.0894589	196	0.335304	0.232542	9.90099e-06	1	4.3681e-09	0.999992	8.26929e-13	Monotone	TRUE	TRUE	FALSE	TRUE	TRUE	TRUE	FALSE	TRUE
pcodonATTGGA	1267	0.156561	0.0350197	9.90099e-06	0.303723	1.91787e-07	0.313734	395	0.316047	0.178311	0	0.998881	1.81957e-21	0.994501	1.63665e-18	Monotone	TRUE	TRUE	FALSE	TRUE	TRUE	TRUE	FALSE	TRUE
pcodonATTGGG	1267	0.150605	0.0227305	6.57895e-05	0.0759605	5.11641e-06	0.070146	329	0.286133	0.155651	0	0.99996	6.90329e-10	0.999241	1.06593e-13	Monotone	TRUE	TRUE	FALSE	TRUE	TRUE	TRUE	FALSE	TRUE
pcodonATCTTT	1267	0.134355	0.00679358	0.007	0.067	0.00677322	0.0520452	268	0.361592	0.304649	0	1	8.76e-19	1	9.05085e-23	Monotone	TRUE	TRUE	FALSE	TRUE	TRUE	TRUE	FALSE	TRUE
pcodonATCTTC	1267	0.120272	0.00490339	0.179	0.332	0.176966	0.353368	174	0.376774	0.256738	1.9802e-05	1	1.25497e-09	0.999963	9.77348e-13	MIC not significant	FALSE	TRUE	FALSE	FALSE	FALSE	TRUE	FALSE	FALSE
pcodonATCTTA	1267	0.124622	0.0208537	0.129	0.952	0.118469	0.933988	237	0.298394	0.19427	0.000148515	1	1.87643e-06	0.999999	1.10075e-12	MIC not significant	FALSE	TRUE	FALSE	FALSE	FALSE	TRUE	FALSE	FALSE
pcodonATCTTG	1267	0.129236	0.0166989	0.033	0.53	0.0199377	0.545948	199	0.320359	0.235052	6.93069e-05	1	8.29879e-08	1	3.97635e-13	Monotone	FALSE	TRUE	FALSE	FALSE	FALSE	TRUE	FALSE	FALSE
pcodonATCTCT	1267	0.123502	0.00532234	0.029	0.098	0.025718	0.0942245	103	0.342095	0.173083	0.02	0.997	0.00996844	0.991701	1.23921e-05	Monotone	FALSE	TRUE	FALSE	FALSE	FALSE	TRUE	FALSE	FALSE
pcodonATCTCC	1267	0.131808	0.00926492	0.002	0.028	0.000763387	0.0234729	96	0.355319	0.259321	0.00605263	0.999987	0.000916578	0.999944	1.16899e-07	Monotone	TRUE	TRUE	FALSE	TRUE	TRUE	TRUE	FALSE	TRUE
pcodonATCTCA	1267	0.107742	0.00290291	0.457	0.606	0.463333	0.622233	44	0.41922	0.302018	0.012	0.996	0.0022824	0.986656	0.000111678	MIC not significant	FALSE	TRUE	FALSE	FALSE	FALSE	TRUE	FALSE	FALSE
pcodonATCTCG	1267	0.128805	0.0221192	0.017	0.714	0.00821726	0.71937	128	0.288934	0.0648203	0.078	0.632	0.074331	0.64712	0.00372991	MIC not significant	FALSE	FALSE	FALSE	FALSE	TRUE	FALSE	FALSE	FALSE
pcodonATCTAT	1267	0.118993	0.00789547	0.154	0.471	0.144958	0.474379	130	0.3624	0.301435	0.00107921	1	2.83945e-05	1	1.34803e-11	MIC not significant	FALSE	TRUE	FALSE	FALSE	FALSE	TRUE	FALSE	FALSE
pcodonATCTAC	1267	0.099272	0.00666645	0.923	0.995	0.907659	0.98898	62	0.320629	0.126827	0.089	0.832	0.0609756	0.81758	0.00449912	MIC not significant	FALSE	FALSE	FALSE	FALSE	FALSE	FALSE	FALSE	FALSE
pcodonATCTAA	1267	0.103154	0.000724814	0.737	0.737	0.751332	0.752104	54	0.418089	0.283429	0.018	0.996	0.00720104	0.991108	4.50266e-05	MIC not significant	FALSE	TRUE	FALSE	FALSE	FALSE	TRUE	FALSE	FALSE
pcodonATCTAG	1267	0.107877	0.00379014	0.525	0.691	0.556802	0.717146	77	0.450413	0.295706	0.000276316	0.993803	6.33661e-07	0.980925	3.20445e-07	MIC not significant	FALSE	TRUE	FALSE	FALSE	FALSE	TRUE	FALSE	FALSE
pcodonATCTGT	1267	0.100447	0.00123707	0.911	0.92	0.90833	0.920554	104	0.463187	0.319846	1.31579e-05	0.999855	3.33181e-09	0.998643	3.96831e-10	MIC not significant	FALSE	TRUE	FALSE	FALSE	FALSE	TRUE	FALSE	FALSE
pcodonATCTGC	1267	0.111103	0.00864574	0.487	0.87	0.497126	0.867604	124	0.391278	0.258706	0.000473684	0.999974	3.4062e-06	0.999703	1.62686e-09	MIC not significant	FALSE	TRUE	FALSE	FALSE	FALSE	TRUE	FALSE	FALSE
pcodonATCTGA	1267	0.123696	0.0180651	0.035	0.734	0.0340383	0.744307	124	0.348437	0.222066	0.00565789	0.999987	0.000962887	0.999862	3.31601e-08	Monotone	FALSE	TRUE	FALSE	FALSE	FALSE	TRUE	FALSE	FALSE
pcodonATCTGG	1267	0.129331	0.0203544	0.029	0.727	0.0239392	0.729265	189	0.421324	0.296578	0	1	2.31235e-19	0.999786	5.47951e-16	Monotone	FALSE	TRUE	FALSE	FALSE	FALSE	TRUE	FALSE	FALSE
pcodonATCCTT	1267	0.145537	0.0323033	0.000118421	0.479105	8.88043e-06	0.493298	185	0.28747	0.131849	0.003	0.996	0.000877005	0.990621	3.778e-07	Monotone	TRUE	TRUE	FALSE	TRUE	TRUE	TRUE	FALSE	TRUE
pcodonATCCTC	1267	0.11614	0.00726712	0.093	0.328	0.0809321	0.354193	69	0.428055	0.345591	0.004	1	0.000386185	0.999963	2.02897e-07	MIC not significant	FALSE	TRUE	FALSE	FALSE	FALSE	TRUE	FALSE	FALSE
pcodonATCCTA	1267	0.118715	0.00273138	0.062	0.082	0.0451984	0.0781459	68	0.526869	0.275373	0.000118421	0.562776	3.18177e-08	0.597599	4.35394e-06	MIC not significant	FALSE	TRUE	FALSE	FALSE	FALSE	TRUE	FALSE	FALSE
pcodonATCCTG	1267	0.108496	0.00440391	0.521	0.717	0.526377	0.729117	85	0.477736	0.329873	0.000105263	0.999408	1.02157e-07	0.996908	9.06973e-09	MIC not significant	FALSE	TRUE	FALSE	FALSE	FALSE	TRUE	FALSE	FALSE
pcodonATCCCT	1267	0.11968	0.0252514	0.11	0.99	0.115476	0.984418	117	0.357526	0.154684	0.003	0.768	6.0724e-05	0.775817	1.15122e-05	MIC not significant	FALSE	TRUE	FALSE	FALSE	FALSE	TRUE	FALSE	FALSE
pcodonATCCCC	1267	0.10891	0.0029081	0.365	0.511	0.394001	0.545824	42	0.537712	0.51974	0.000973684	0.999987	3.4992e-06	0.999972	3.29234e-07	MIC not significant	FALSE	TRUE	FALSE	FALSE	FALSE	TRUE	FALSE	FALSE
pcodonATCCCG	1267	0.124473	0.0185747	0.03	0.708	0.0235185	0.731179	115	0.349207	0.221392	0.00338158	0.999934	0.000311167	0.999286	1.11938e-07	Monotone	FALSE	TRUE	FALSE	FALSE	FALSE	TRUE	FALSE	FALSE
pcodonATCCAG	1267	0.117116	0.00844176	0.078	0.382	0.0694049	0.397544	62	0.503771	0.442466	0.000131579	0.999974	2.04679e-08	0.999933	8.36865e-09	MIC not significant	FALSE	TRUE	FALSE	FALSE	FALSE	TRUE	FALSE	FALSE
pcodonATCCGT	1267	0.117531	0.00421497	0.071	0.176	0.0678394	0.166162	72	0.313243	0.251905	0.128	1	0.1277	0.999994	7.06823e-06	MIC not significant	FALSE	FALSE	FALSE	FALSE	FALSE	FALSE	FALSE	FALSE
pcodonATCCGA	1267	0.104835	0.00198293	0.648	0.722	0.65433	0.723634	60	0.33994	0.258659	0.0594868	0.999947	0.0427308	0.999667	4.29042e-05	MIC not significant	FALSE	FALSE	FALSE	FALSE	FALSE	FALSE	FALSE	FALSE
[truncated: 1,649 more rows]

## Sheet: Description
Column name	Description
[truncated: 25 more rows]
