# Supplementary material for: Most associations between transcript features and gene expression are monotonic
Source: Royal Society of Chemistry journal article supplement (doi:10.1039/c3mb70617f), 2014-03-17
Supplement: c3mb70617f5.xlsx [file c3mb70617f5.xlsx]

## Sheet: Data
Name	Number of genes	MIC	Spearman (rho2)	MIC Empirical p-value	Diff Empirical p-value	Z Score p-value	Diff Z Score p-value	Number of genes Filtered	MIC Filtered	Spearman Filtered (rho2)	MIC Empirical p-value Filtered	Diff Empirical p-value Filtered	Z Score p-value Filtered	Diff Z Score p-value Filtered	Spearman p-value Filtered	Classification	MIC empirical p-value pass FDR	Filtered MIC empirical p-value pass FDR	empirical p-value non-monotonicity pass FDR	empirical p-value Monotonicity pass FDR	MIC Z score p-value pass FDR	Filtered MIC Z score p-value pass FDR	Z score p-value non-monotonicity pass FDR	Z score p-value monotonicity pass FDR
utr5gc	1343	0.128423	0.0226671	0.071	0.954	0.0625454	0.932962	1341	0.12771	0.0220487	0.1	0.956	0.0865673	0.945131	4.68641e-08	MIC not significant	FALSE	FALSE	FALSE	FALSE	FALSE	FALSE	FALSE	FALSE
utr5gc40	1343	0.13111	0.0199647	0.03	0.76	0.0241173	0.772272	1341	0.131227	0.0193817	0.034	0.75	0.0300247	0.74747	3.08291e-07	non-significant monotone/non-monotone	FALSE	FALSE	FALSE	FALSE	FALSE	FALSE	FALSE	FALSE
utr5meanFE	1203	0.148783	0.0370547	0.002	0.976	0.000177004	0.964989	1203	0.148783	0.0370547	0.001	0.978	0.000149092	0.963659	1.6653e-11	Monotone	TRUE	TRUE	FALSE	TRUE	TRUE	TRUE	FALSE	FALSE
utr5meanFE40	1203	0.148981	0.034194	0.000855263	0.769947	0.000198974	0.775383	1203	0.148981	0.034194	0.001	0.794	0.000251492	0.790038	1.02763e-10	non-significant monotone/non-monotone	TRUE	TRUE	FALSE	FALSE	TRUE	TRUE	FALSE	FALSE
utr5bestATG	1343	0.102378	0.00228815	0.787	0.86	0.798442	0.858459	117	0.23468	0.0531922	0.509	0.954	0.532624	0.934876	0.0125131	MIC not significant	FALSE	FALSE	FALSE	FALSE	FALSE	FALSE	FALSE	FALSE
utr5MeanATG	1343	0.102378	0.00233801	0.803	0.857	0.798229	0.858068	117	0.242252	0.0400882	0.388	0.792	0.415925	0.799233	0.0305877	MIC not significant	FALSE	FALSE	FALSE	FALSE	FALSE	FALSE	FALSE	FALSE
utr5bestATG30C	1343	0.108747	0.00425442	0.266	0.495	0.290613	0.507305	75	0.204659	0.0162662	0.91	0.932	0.892076	0.911994	0.274877	MIC not significant	FALSE	FALSE	FALSE	FALSE	FALSE	FALSE	FALSE	FALSE
utr5MeanATG30C	1343	0.108747	0.00425061	0.299	0.487	0.30353	0.511568	75	0.219224	0.017	0.816	0.843	0.819996	0.835196	0.264244	MIC not significant	FALSE	FALSE	FALSE	FALSE	FALSE	FALSE	FALSE	FALSE
utr5bestATG0	1343	0.10328	0.00012486	0.6	0.568	0.61985	0.580286	68	0.242655	0.0169986	0.764	0.798	0.777583	0.799155	0.289268	MIC not significant	FALSE	FALSE	FALSE	FALSE	FALSE	FALSE	FALSE	FALSE
utr5MeanATG0	1343	0.10328	0.000128795	0.608	0.575	0.632491	0.595401	68	0.272848	0.011237	0.511	0.498	0.562245	0.543255	0.388711	MIC not significant	FALSE	FALSE	FALSE	FALSE	FALSE	FALSE	FALSE	FALSE
utr5bestATG1	1343	0.101651	8.5659e-05	0.714	0.668	0.724488	0.691693	60	0.26776	0.0493114	0.328	0.635	0.381765	0.659827	0.088195	MIC not significant	FALSE	FALSE	FALSE	FALSE	FALSE	FALSE	FALSE	FALSE
utr5MeanATG1	1343	0.101651	8.5511e-05	0.687	0.649	0.703267	0.666698	60	0.233333	0.0509036	0.671	0.919	0.689776	0.889343	0.0831223	MIC not significant	FALSE	FALSE	FALSE	FALSE	FALSE	FALSE	FALSE	FALSE
utr5bestATG2	1343	0.10013	2.52745e-07	0.794	0.743	0.788541	0.752645	58	0.47466	0.0635774	0.000855263	0.00386842	8.34457e-06	0.000319078	0.0564427	MIC not significant	FALSE	TRUE	FALSE	FALSE	FALSE	TRUE	FALSE	FALSE
utr5MeanATG2	1343	0.10013	7.35287e-07	0.777	0.739	0.791678	0.755459	58	0.465208	0.0371868	0.002	0.004	4.03569e-05	0.000128732	0.146692	MIC not significant	FALSE	TRUE	FALSE	FALSE	FALSE	TRUE	FALSE	FALSE
utr5numATGs	1343	0.102378	0.00223685	0.766	0.841	0.772456	0.833807	117	0.272672	0.0760671	0.067	0.608	0.0599336	0.647285	0.0026139	MIC not significant	FALSE	FALSE	FALSE	FALSE	FALSE	FALSE	FALSE	FALSE
utr5numATGs0	1343	0.10328	0.000105965	0.619	0.59	0.632476	0.593186	68	0.327707	0.102	0.075	0.53	0.0529776	0.580836	0.00793739	MIC not significant	FALSE	FALSE	FALSE	FALSE	FALSE	FALSE	FALSE	FALSE
utr5numATGs1	1343	0.101651	8.98101e-05	0.715	0.67	0.725892	0.687494	60	0.216121	0.0372798	0.572	0.76	0.615666	0.767512	0.139388	MIC not significant	FALSE	FALSE	FALSE	FALSE	FALSE	FALSE	FALSE	FALSE
utr5numATGs2	1343	0.10013	1.60034e-07	0.817	0.78	0.809306	0.773757	58	0.495804	0.17884	0.001	0.051	8.98656e-07	0.0308283	0.000942312	MIC not significant	FALSE	TRUE	FALSE	FALSE	FALSE	TRUE	FALSE	FALSE
utr5numATGs30C	1343	0.108747	0.00441983	0.274	0.501	0.289391	0.519872	75	0.187489	0.00114276	0.838	0.733	0.827195	0.748755	0.773406	MIC not significant	FALSE	FALSE	FALSE	FALSE	FALSE	FALSE	FALSE	FALSE
utr5distATG	1343	0.102378	0.00291525	0.786	0.883	0.799775	0.878041	117	0.23604	0.0239883	0.403	0.594	0.436156	0.625035	0.0954371	MIC not significant	FALSE	FALSE	FALSE	FALSE	FALSE	FALSE	FALSE	FALSE
utr5distATG0	1343	0.10328	0.000205597	0.614	0.575	0.632423	0.597918	68	0.361565	0.0944795	0.037	0.318	0.0200773	0.365563	0.0107804	MIC not significant	FALSE	FALSE	FALSE	FALSE	FALSE	FALSE	FALSE	FALSE
utr5distATG1	1343	0.101651	0.000162651	0.715	0.674	0.719818	0.690445	60	0.267088	0.122825	0.311	0.993	0.356988	0.969873	0.00604676	MIC not significant	FALSE	FALSE	FALSE	FALSE	FALSE	FALSE	FALSE	FALSE
utr5distATG2	1343	0.10013	5.15774e-06	0.801	0.778	0.810146	0.780503	58	0.257934	0.00406076	0.451	0.357	0.502693	0.391741	0.634625	MIC not significant	FALSE	FALSE	FALSE	FALSE	FALSE	FALSE	FALSE	FALSE
utr5Lens	1343	0.13021	0.00319061	0.024	0.059	0.0269143	0.0581518	1343	0.13021	0.00319061	0.04	0.067	0.0323701	0.0647993	0.038476	non-significant monotone/non-monotone	FALSE	FALSE	FALSE	FALSE	FALSE	FALSE	FALSE	FALSE
utr5uORFsBio	1343	0.102378	0.00223685	0.785	0.846	0.785327	0.846124	117	0.272672	0.0760671	0.073	0.601	0.0615759	0.632724	0.0026139	MIC not significant	FALSE	FALSE	FALSE	FALSE	FALSE	FALSE	FALSE	FALSE
u5maxLenuORFs	1343	0.102378	0.00235368	0.769	0.848	0.785406	0.850672	117	0.218159	0.035542	0.523	0.844	0.562821	0.839726	0.0417888	MIC not significant	FALSE	FALSE	FALSE	FALSE	FALSE	FALSE	FALSE	FALSE
u5meanLenuORFs	1343	0.102378	0.0025297	0.781	0.852	0.779275	0.851184	117	0.176144	0.00628039	0.962	0.953	0.9466	0.937533	0.395692	MIC not significant	FALSE	FALSE	FALSE	FALSE	FALSE	FALSE	FALSE	FALSE
u5maxCostuORFs	1343	0.102378	0.00232338	0.78	0.852	0.792416	0.855909	117	0.232476	0.0438266	0.473	0.892	0.515875	0.883423	0.0234945	MIC not significant	FALSE	FALSE	FALSE	FALSE	FALSE	FALSE	FALSE	FALSE
u5meanCostuORFs	1343	0.102378	0.00248304	0.798	0.865	0.798139	0.861335	117	0.180711	0.0120447	0.983	0.989	0.960679	0.967212	0.238827	MIC not significant	FALSE	FALSE	FALSE	FALSE	FALSE	FALSE	FALSE	FALSE
utr5uORFs30C	1343	0.108747	0.00441983	0.284	0.486	0.304757	0.524691	75	0.187489	0.00114276	0.828	0.757	0.832979	0.76226	0.773406	MIC not significant	FALSE	FALSE	FALSE	FALSE	FALSE	FALSE	FALSE	FALSE
u5maxLenuORFs30C	1343	0.108747	0.00442328	0.273	0.499	0.297706	0.51654	75	0.178004	5.61033e-05	0.966	0.914	0.933003	0.889983	0.949147	MIC not significant	FALSE	FALSE	FALSE	FALSE	FALSE	FALSE	FALSE	FALSE
u5meanLenuORFs30C	1343	0.108747	0.0044398	0.3	0.516	0.30954	0.540937	75	0.176286	0.000412335	0.973	0.933	0.939037	0.898736	0.862715	MIC not significant	FALSE	FALSE	FALSE	FALSE	FALSE	FALSE	FALSE	FALSE
u5maxCostuORFs30C	1343	0.108747	0.0043905	0.305	0.548	0.339748	0.566859	75	0.271207	0.000691851	0.321	0.237	0.372857	0.255816	0.822754	MIC not significant	FALSE	FALSE	FALSE	FALSE	FALSE	FALSE	FALSE	FALSE
u5meanCostuORFs30C	1343	0.108747	0.00439946	0.273	0.502	0.301054	0.525071	75	0.261516	0.000350465	0.379	0.284	0.434935	0.315564	0.87334	MIC not significant	FALSE	FALSE	FALSE	FALSE	FALSE	FALSE	FALSE	FALSE
utr5uORFs0	1343	0.10328	0.000105965	0.624	0.578	0.643478	0.605917	68	0.327707	0.102	0.077	0.546	0.0584611	0.576887	0.00793739	MIC not significant	FALSE	FALSE	FALSE	FALSE	FALSE	FALSE	FALSE	FALSE
utr5uORFs1	1343	0.101651	8.98101e-05	0.699	0.663	0.723784	0.687433	60	0.216121	0.0372798	0.561	0.744	0.613136	0.757603	0.139388	MIC not significant	FALSE	FALSE	FALSE	FALSE	FALSE	FALSE	FALSE	FALSE
utr5uORFs2	1343	0.10013	1.60034e-07	0.79	0.748	0.793088	0.755889	58	0.495804	0.17884	0.000184211	0.0404605	1.88785e-07	0.0252397	0.000942312	MIC not significant	FALSE	TRUE	FALSE	FALSE	FALSE	TRUE	FALSE	FALSE
u5maxLenuORFs0	1343	0.10328	0.000130683	0.616	0.578	0.633314	0.593769	68	0.265168	0.00755119	0.436	0.386	0.475764	0.419419	0.481043	MIC not significant	FALSE	FALSE	FALSE	FALSE	FALSE	FALSE	FALSE	FALSE
u5maxLenuORFs1	1343	0.101651	0.000115204	0.719	0.684	0.732015	0.698434	60	0.226723	0.000141601	0.587	0.456	0.632729	0.507285	0.928098	MIC not significant	FALSE	FALSE	FALSE	FALSE	FALSE	FALSE	FALSE	FALSE
u5maxLenuORFs2	1343	0.10013	6.9498e-07	0.793	0.765	0.798281	0.766103	58	0.221987	0.0298476	0.722	0.829	0.732011	0.807052	0.194675	MIC not significant	FALSE	FALSE	FALSE	FALSE	FALSE	FALSE	FALSE	FALSE
u5meanLenuORFs0	1343	0.10328	0.000137335	0.57	0.529	0.61598	0.582125	68	0.268104	0.00203849	0.407	0.319	0.455948	0.350323	0.714666	MIC not significant	FALSE	FALSE	FALSE	FALSE	FALSE	FALSE	FALSE	FALSE
u5meanLenuORFs1	1343	0.101651	0.000117771	0.701	0.657	0.715489	0.677813	60	0.260285	0.000928205	0.37	0.256	0.422662	0.292401	0.817252	MIC not significant	FALSE	FALSE	FALSE	FALSE	FALSE	FALSE	FALSE	FALSE
u5meanLenuORFs2	1343	0.10013	3.51182e-06	0.786	0.753	0.786109	0.749384	58	0.229486	2.9339e-05	0.655	0.529	0.693682	0.571566	0.967811	MIC not significant	FALSE	FALSE	FALSE	FALSE	FALSE	FALSE	FALSE	FALSE
u5maxCostuORFs0	1343	0.10328	0.000132862	0.61	0.567	0.629605	0.592301	68	0.269416	0.00538056	0.496	0.431	0.543107	0.464584	0.552201	MIC not significant	FALSE	FALSE	FALSE	FALSE	FALSE	FALSE	FALSE	FALSE
u5maxCostuORFs1	1343	0.101651	0.000111619	0.71	0.68	0.723785	0.692595	60	0.271404	0.000105133	0.329	0.208	0.353751	0.228027	0.938024	MIC not significant	FALSE	FALSE	FALSE	FALSE	FALSE	FALSE	FALSE	FALSE
u5maxCostuORFs2	1343	0.10013	8.53202e-07	0.787	0.745	0.792582	0.755773	58	0.240585	0.0240554	0.658	0.711	0.686418	0.732521	0.245021	MIC not significant	FALSE	FALSE	FALSE	FALSE	FALSE	FALSE	FALSE	FALSE
u5meanCostuORFs0	1343	0.10328	0.000142042	0.601	0.564	0.625431	0.584399	68	0.266757	0.000294452	0.531	0.42	0.579814	0.450687	0.889538	MIC not significant	FALSE	FALSE	FALSE	FALSE	FALSE	FALSE	FALSE	FALSE
u5meanCostuORFs1	1343	0.101651	0.000116039	0.713	0.68	0.723734	0.688793	60	0.301929	0.000483087	0.176	0.103	0.182559	0.104543	0.867615	MIC not significant	FALSE	FALSE	FALSE	FALSE	FALSE	FALSE	FALSE	FALSE
u5meanCostuORFs2	1343	0.10013	3.71047e-06	0.784	0.745	0.794975	0.76073	58	0.206303	0.000256867	0.916	0.816	0.896697	0.811895	0.904951	MIC not significant	FALSE	FALSE	FALSE	FALSE	FALSE	FALSE	FALSE	FALSE
rutr5bestATG	1339	0.155693	0.0620081	0	1	1.52366e-08	0.999987	1338	0.154896	0.0612285	0	1	3.74896e-08	0.999987	4.07997e-20	Monotone	TRUE	TRUE	FALSE	TRUE	TRUE	TRUE	FALSE	TRUE
rutr5MeanATG	1339	0.155693	0.0623623	0	1	1.46545e-08	0.99999	1338	0.154896	0.0615812	0	1	3.56592e-08	0.99999	3.16532e-20	Monotone	TRUE	TRUE	FALSE	TRUE	TRUE	TRUE	FALSE	TRUE
rutr5bestATG30C	1339	0.157912	0.0696004	0	1	1.60815e-09	1	1338	0.156899	0.0687906	9.90099e-06	1	5.08605e-09	1	1.73593e-22	Monotone	TRUE	TRUE	FALSE	TRUE	TRUE	TRUE	FALSE	TRUE
rutr5MeanATG30C	1339	0.157912	0.0695816	0	1	1.82358e-09	1	1338	0.156899	0.0687719	9.90099e-06	1	5.26474e-09	1	1.75957e-22	Monotone	TRUE	TRUE	FALSE	TRUE	TRUE	TRUE	FALSE	TRUE
rutr5bestATG0	1339	0.156984	0.0607753	0	1	4.45342e-09	0.999922	1338	0.156055	0.0600023	0	1	1.03584e-08	0.999936	9.85409e-20	Monotone	TRUE	TRUE	FALSE	TRUE	TRUE	TRUE	FALSE	TRUE
rutr5MeanATG0	1339	0.156984	0.0608921	0	1	4.6496e-09	0.99993	1338	0.156055	0.0601185	0	1	1.17931e-08	0.99994	9.06443e-20	Monotone	TRUE	TRUE	FALSE	TRUE	TRUE	TRUE	FALSE	TRUE
rutr5bestATG1	1339	0.153414	0.058465	2.63158e-05	1	9.9556e-08	0.999968	1338	0.153168	0.0577023	4.9505e-05	1	1.62101e-07	0.999953	5.13893e-19	Monotone	TRUE	TRUE	FALSE	TRUE	TRUE	TRUE	FALSE	TRUE
rutr5MeanATG1	1339	0.153414	0.0586775	1.31579e-05	1	9.79991e-08	0.999974	1338	0.153168	0.0579139	2.9703e-05	1	1.37323e-07	0.999962	4.41535e-19	Monotone	TRUE	TRUE	FALSE	TRUE	TRUE	TRUE	FALSE	TRUE
rutr5bestATG2	1339	0.157129	0.0602365	9.90099e-06	1	3.87515e-09	0.999884	1338	0.156133	0.0594661	0	1	1.1254e-08	0.999902	1.44863e-19	Monotone	TRUE	TRUE	FALSE	TRUE	TRUE	TRUE	FALSE	TRUE
rutr5MeanATG2	1339	0.157129	0.0605487	0	1	3.43433e-09	0.999908	1338	0.156133	0.059777	9.90099e-06	0.99999	1.02948e-08	0.999923	1.15867e-19	Monotone	TRUE	TRUE	FALSE	TRUE	TRUE	TRUE	FALSE	TRUE
rutr5bestATG030C	1339	0.162749	0.0714586	0	1	1.19703e-11	0.999998	1338	0.161688	0.0706389	0	1	4.3379e-11	0.999998	4.54455e-23	Monotone	TRUE	TRUE	FALSE	TRUE	TRUE	TRUE	FALSE	TRUE
rutr5MeanATG030C	1339	0.162749	0.071467	0	1	1.28041e-11	0.999997	1338	0.161688	0.0706473	0	1	4.75591e-11	0.999998	4.51715e-23	Monotone	TRUE	TRUE	FALSE	TRUE	TRUE	TRUE	FALSE	TRUE
rutr5bestATG130C	1339	0.155239	0.0674606	2.63158e-05	1	2.29575e-08	1	1338	0.156285	0.066657	0	1	8.84702e-09	0.999999	8.1315e-22	Monotone	TRUE	TRUE	FALSE	TRUE	TRUE	TRUE	FALSE	TRUE
rutr5MeanATG130C	1339	0.155239	0.0674623	2.63158e-05	1	1.91429e-08	1	1338	0.156285	0.0666587	1.9802e-05	1	9.70894e-09	0.999999	8.12143e-22	Monotone	TRUE	TRUE	FALSE	TRUE	TRUE	TRUE	FALSE	TRUE
rutr5bestATG230C	1339	0.162814	0.0684048	0	1	1.01504e-11	0.999978	1338	0.161797	0.0676011	0	1	4.66086e-11	0.999979	4.10754e-22	Monotone	TRUE	TRUE	FALSE	TRUE	TRUE	TRUE	FALSE	TRUE
rutr5MeanATG230C	1339	0.162814	0.0684091	0	1	1.09766e-11	0.999978	1338	0.161797	0.0676054	0	1	3.84004e-11	0.999981	4.09489e-22	Monotone	TRUE	TRUE	FALSE	TRUE	TRUE	TRUE	FALSE	TRUE
utr5_PARS_numBP_all	1140	0.137567	0.00316944	0.063	0.093	0.0529796	0.0899568	562	0.179209	0.001061	0.034	0.034	0.0275974	0.0236759	0.440897	MIC not significant	FALSE	FALSE	FALSE	FALSE	FALSE	FALSE	FALSE	FALSE
orfgc	1343	0.18531	0.0780629	0	0.987455	3.6293e-25	0.978572	1343	0.18531	0.0780629	0	0.987406	2.91307e-25	0.978742	1.66106e-25	Monotone	TRUE	TRUE	FALSE	TRUE	TRUE	TRUE	FALSE	TRUE
orfmeanFE	1343	0.197932	0.129878	0	1	1.48153e-34	1	1343	0.197932	0.129878	0	1	1.22546e-34	1	0	Monotone	TRUE	TRUE	FALSE	TRUE	TRUE	TRUE	FALSE	TRUE
orfbestATG	1343	0.15304	0.0366248	1.31579e-05	0.636513	7.40461e-08	0.653958	1340	0.151641	0.0348679	1.31579e-05	0.629039	2.82145e-07	0.64503	5.59006e-12	non-significant monotone/non-monotone	TRUE	TRUE	FALSE	FALSE	TRUE	TRUE	FALSE	FALSE
orfMeanATG	1343	0.143753	0.0336769	0.001	0.958	0.000245327	0.940162	1340	0.143951	0.0319964	0.002	0.936	0.000130996	0.915175	4.25087e-11	non-significant monotone/non-monotone	TRUE	TRUE	FALSE	FALSE	TRUE	TRUE	FALSE	FALSE
orfbestATG30C	1343	0.138681	0.0191961	0.004	0.381	0.00181268	0.422497	970	0.13944	0.00913944	0.185	0.56	0.198854	0.574791	0.00287827	MIC not significant	TRUE	FALSE	FALSE	FALSE	TRUE	FALSE	FALSE	FALSE
orfMeanATG30C	1343	0.13309	0.017467	0.023	0.632	0.0134701	0.645184	970	0.134832	0.00695658	0.374	0.66	0.386217	0.683748	0.00935371	MIC not significant	FALSE	FALSE	FALSE	FALSE	FALSE	FALSE	FALSE	FALSE
orfbestATG200C	1343	0.152717	0.0308844	1.31579e-05	0.334961	1.18305e-07	0.354543	1340	0.151947	0.0292386	2.63158e-05	0.299421	3.16315e-07	0.317209	2.97686e-10	non-significant monotone/non-monotone	TRUE	TRUE	FALSE	FALSE	TRUE	TRUE	FALSE	FALSE
orfMeanATG200C	1343	0.133099	0.0204423	0.031	0.88	0.0285676	0.881176	1340	0.13223	0.0190624	0.05	0.891	0.0389149	0.878146	3.90231e-07	MIC not significant	FALSE	FALSE	FALSE	FALSE	FALSE	FALSE	FALSE	FALSE
orfbestATG0	1343	0.132035	0.0114118	0.03	0.37	0.0221068	0.384284	1275	0.131056	0.00390282	0.091	0.198	0.0893243	0.189134	0.0257005	MIC not significant	FALSE	FALSE	FALSE	FALSE	FALSE	FALSE	FALSE	FALSE
orfMeanATG0	1343	0.119508	0.00673327	0.536	0.899	0.566187	0.877137	1275	0.114346	0.00121613	0.923	0.931	0.918803	0.926583	0.213362	MIC not significant	FALSE	FALSE	FALSE	FALSE	FALSE	FALSE	FALSE	FALSE
orfbestATG1	1343	0.157499	0.0474585	0	0.937644	1.36375e-09	0.926968	1328	0.156383	0.0425041	0	0.851416	1.72504e-08	0.848162	3.25882e-14	non-significant monotone/non-monotone	TRUE	TRUE	FALSE	FALSE	TRUE	TRUE	FALSE	FALSE
orfMeanATG1	1343	0.148745	0.0425561	9.21053e-05	0.994224	5.00936e-06	0.988321	1328	0.146789	0.0378005	0.000644737	0.986816	5.66148e-05	0.977262	8.88485e-13	Monotone	TRUE	TRUE	FALSE	TRUE	TRUE	TRUE	FALSE	TRUE
orfbestATG2	1343	0.125903	0.0236793	0.148	1	0.142706	0.993017	1114	0.134651	0.0136523	0.178	0.805	0.179541	0.810544	9.27403e-05	MIC not significant	FALSE	FALSE	FALSE	FALSE	FALSE	FALSE	FALSE	FALSE
orfMeanATG2	1343	0.133643	0.0219224	0.019	0.865	0.00949846	0.86114	1114	0.145165	0.0117199	0.017	0.182	0.00878519	0.194552	0.00029473	non-significant monotone/non-monotone	FALSE	FALSE	FALSE	FALSE	FALSE	FALSE	FALSE	FALSE
orfbestATG030C	1343	0.127848	0.00268292	0.039	0.063	0.0277937	0.0507581	314	0.208041	0.00191674	0.084	0.078	0.0708711	0.0622805	0.439481	MIC not significant	FALSE	FALSE	FALSE	FALSE	FALSE	FALSE	FALSE	FALSE
orfMeanATG030C	1343	0.127848	0.00266133	0.039	0.06	0.0351861	0.0593029	314	0.19826	0.00226939	0.219	0.206	0.230767	0.215242	0.400202	MIC not significant	FALSE	FALSE	FALSE	FALSE	FALSE	FALSE	FALSE	FALSE
orfbestATG130C	1343	0.122837	0.014537	0.229	0.903	0.224104	0.892347	755	0.147196	0.0186694	0.346	0.954	0.37332	0.94364	0.000165994	MIC not significant	FALSE	FALSE	FALSE	FALSE	FALSE	FALSE	FALSE	FALSE
orfMeanATG130C	1343	0.123557	0.0136234	0.21	0.843	0.210049	0.835446	755	0.142023	0.0156704	0.594	0.98	0.615818	0.965896	0.000565762	MIC not significant	FALSE	FALSE	FALSE	FALSE	FALSE	FALSE	FALSE	FALSE
orfbestATG230C	1343	0.101952	0.0026621	0.915	0.956	0.912543	0.948777	199	0.237173	4.91575e-06	0.086	0.064	0.08389	0.0547885	0.975206	MIC not significant	FALSE	FALSE	FALSE	FALSE	FALSE	FALSE	FALSE	FALSE
orfMeanATG230C	1343	0.101952	0.00262987	0.914	0.953	0.904723	0.943139	199	0.231781	4.89383e-05	0.121	0.092	0.124877	0.0830507	0.921881	MIC not significant	FALSE	FALSE	FALSE	FALSE	FALSE	FALSE	FALSE	FALSE
orfbestATG0200C	1343	0.130505	0.00701115	0.057	0.233	0.0469737	0.248482	1214	0.131368	0.00355976	0.177	0.278	0.180025	0.305412	0.0376594	MIC not significant	FALSE	FALSE	FALSE	FALSE	FALSE	FALSE	FALSE	FALSE
orfMeanATG0200C	1343	0.133213	0.00559769	0.039	0.123	0.0254184	0.114013	1214	0.132025	0.00238572	0.154	0.227	0.17417	0.240066	0.0889233	MIC not significant	FALSE	FALSE	FALSE	FALSE	FALSE	FALSE	FALSE	FALSE
orfbestATG1200C	1343	0.138811	0.0242737	0.003	0.785	0.000975955	0.788369	1326	0.140465	0.0201573	0.006	0.534	0.00184542	0.552017	2.08711e-07	non-significant monotone/non-monotone	TRUE	FALSE	FALSE	FALSE	TRUE	TRUE	FALSE	FALSE
orfMeanATG1200C	1343	0.135169	0.0178729	0.025	0.692	0.0115206	0.701097	1326	0.138421	0.0142225	0.016	0.347	0.00710989	0.3615	1.3358e-05	non-significant monotone/non-monotone	FALSE	FALSE	FALSE	FALSE	FALSE	FALSE	FALSE	FALSE
orfbestATG2200C	1343	0.123086	0.00343666	0.199	0.318	0.203777	0.336641	823	0.140037	0.0054359	0.604	0.776	0.620596	0.789199	0.0344481	MIC not significant	FALSE	FALSE	FALSE	FALSE	FALSE	FALSE	FALSE	FALSE
orfMeanATG2200C	1343	0.118854	0.00288643	0.427	0.546	0.454186	0.575463	823	0.133533	0.00368169	0.888	0.941	0.875296	0.927479	0.0819196	MIC not significant	FALSE	FALSE	FALSE	FALSE	FALSE	FALSE	FALSE	FALSE
orfnumATGs	1343	0.134168	0.036626	0.014	0.999	0.00862191	0.996176	1340	0.133618	0.0348508	0.017	0.997	0.013115	0.992444	5.65784e-12	Monotone	FALSE	FALSE	FALSE	FALSE	FALSE	FALSE	FALSE	FALSE
orfnumATGs0	1343	0.11841	0.0237569	0.417	1	0.429479	0.998651	1275	0.114402	0.0134011	0.734	0.993	0.737066	0.988039	3.42114e-05	MIC not significant	FALSE	FALSE	FALSE	FALSE	FALSE	FALSE	FALSE	FALSE
orfnumATGs1	1343	0.138628	0.0391791	0.005	0.995	0.00179254	0.990408	1328	0.136963	0.0343922	0.009	0.987	0.00550807	0.977121	9.69465e-12	Monotone	TRUE	FALSE	FALSE	FALSE	TRUE	FALSE	FALSE	FALSE
orfnumATGs2	1343	0.114137	0.0155299	0.654	0.999	0.68104	0.994989	1114	0.124353	0.00548137	0.457	0.696	0.497125	0.703215	0.0134472	MIC not significant	FALSE	FALSE	FALSE	FALSE	FALSE	FALSE	FALSE	FALSE
orfnumATGs30C	1343	0.133856	0.0215507	0.018	0.687	0.0099395	0.70165	970	0.155144	0.0127293	0.003	0.06	0.00101029	0.0375814	0.000430567	non-significant monotone/non-monotone	FALSE	TRUE	FALSE	FALSE	FALSE	TRUE	FALSE	FALSE
orfnumATGs030C	1343	0.127848	0.00280676	0.033	0.057	0.0252169	0.0472393	314	0.17935	0.000963827	0.276	0.23	0.289108	0.239708	0.583646	MIC not significant	FALSE	FALSE	FALSE	FALSE	FALSE	FALSE	FALSE	FALSE
orfnumATGs130C	1343	0.109626	0.0125152	0.86	0.998	0.861035	0.99672	755	0.151845	0.0139916	0.1	0.439	0.0957289	0.457509	0.001129	MIC not significant	FALSE	FALSE	FALSE	FALSE	FALSE	FALSE	FALSE	FALSE
orfnumATGs230C	1343	0.101952	0.00292159	0.925	0.955	0.907736	0.949713	199	0.285177	0.0204147	7.89474e-05	0.000447368	4.90856e-07	8.23195e-06	0.0440922	MIC not significant	FALSE	TRUE	FALSE	FALSE	FALSE	TRUE	FALSE	FALSE
orfnumATGs200C	1343	0.153959	0.0432988	9.90099e-06	0.787307	1.61806e-07	0.789968	1340	0.153131	0.0413968	0	0.750356	4.25591e-07	0.756111	5.48712e-14	non-significant monotone/non-monotone	TRUE	TRUE	FALSE	FALSE	TRUE	TRUE	FALSE	FALSE
orfnumATGs0200C	1343	0.145784	0.00634721	0.001	0.002	4.9199e-05	0.000889296	1214	0.143169	0.00295171	0.005	0.009	0.00160608	0.00367479	0.0584337	Non-monotone	TRUE	FALSE	FALSE	FALSE	TRUE	TRUE	FALSE	FALSE
orfnumATGs1200C	1343	0.161672	0.0455541	0	0.503327	3.4401e-10	0.520513	1326	0.160596	0.0403672	1.31579e-05	0.352382	3.6017e-09	0.365425	1.52752e-13	non-significant monotone/non-monotone	TRUE	TRUE	FALSE	FALSE	TRUE	TRUE	FALSE	FALSE
orfnumATGs2200C	1343	0.115795	0.00359257	0.575	0.731	0.58997	0.73042	823	0.15077	0.00669352	0.114	0.238	0.111027	0.243119	0.0189027	MIC not significant	FALSE	FALSE	FALSE	FALSE	FALSE	FALSE	FALSE	FALSE
orfdistATG	1343	0.125633	0.0313679	0.129	1	0.125711	0.998782	1340	0.125092	0.0297057	0.168	0.999	0.156356	0.998772	2.14109e-10	MIC not significant	FALSE	FALSE	FALSE	FALSE	FALSE	FALSE	FALSE	FALSE
orfdistATG0	1343	0.109611	0.00133192	0.847	0.864	0.850393	0.868536	1275	0.120322	0.000303707	0.435	0.406	0.456703	0.430991	0.534131	MIC not significant	FALSE	FALSE	FALSE	FALSE	FALSE	FALSE	FALSE	FALSE
orfdistATG1	1343	0.112354	0.0189998	0.742	1	0.754511	0.999222	1328	0.112653	0.0153661	0.786	0.999	0.779855	0.997545	5.88315e-06	MIC not significant	FALSE	FALSE	FALSE	FALSE	FALSE	FALSE	FALSE	FALSE
orfdistATG2	1343	0.115158	0.00590166	0.606	0.844	0.614987	0.842262	1114	0.117118	1.30216e-05	0.81	0.775	0.80363	0.774956	0.904241	MIC not significant	FALSE	FALSE	FALSE	FALSE	FALSE	FALSE	FALSE	FALSE
orfLens	1343	0.121506	0.0157762	0.272	0.948	0.283571	0.936521	1343	0.121506	0.0157762	0.282	0.971	0.29348	0.961687	3.89352e-06	MIC not significant	FALSE	FALSE	FALSE	FALSE	FALSE	FALSE	FALSE	FALSE
orfuORFs	1343	0.129339	0.0237098	0.048	0.959	0.0426721	0.946161	1255	0.137206	0.0325377	0.023	0.992	0.016035	0.981406	1.22091e-10	Monotone	FALSE	FALSE	FALSE	FALSE	FALSE	FALSE	FALSE	FALSE
orfmaxLenuORFs	1343	0.117744	0.00832646	0.487	0.884	0.523268	0.877167	1255	0.123224	0.011828	0.373	0.914	0.39307	0.901551	0.000113188	MIC not significant	FALSE	FALSE	FALSE	FALSE	FALSE	FALSE	FALSE	FALSE
orfmeanLenuORFs	1343	0.112513	0.00217933	0.893	0.947	0.893248	0.932217	1255	0.121943	0.00334467	0.655	0.785	0.652353	0.778111	0.040514	MIC not significant	FALSE	FALSE	FALSE	FALSE	FALSE	FALSE	FALSE	FALSE
orfmaxCostuORFs	1343	0.123811	0.00834837	0.251	0.751	0.278003	0.745329	1255	0.13091	0.0118588	0.178	0.798	0.181902	0.793436	0.000110869	MIC not significant	FALSE	FALSE	FALSE	FALSE	FALSE	FALSE	FALSE	FALSE
orfmeanCostuORFs	1343	0.12001	0.00227791	0.468	0.572	0.497316	0.597358	1255	0.125593	0.00348469	0.441	0.622	0.467412	0.634014	0.0365298	MIC not significant	FALSE	FALSE	FALSE	FALSE	FALSE	FALSE	FALSE	FALSE
orfuORFs30C	1343	0.133856	0.0215507	0.013	0.666	0.00796393	0.681322	970	0.155144	0.0127293	0.003	0.046	0.00112494	0.0427759	0.000430567	Non-monotone	FALSE	TRUE	FALSE	FALSE	FALSE	TRUE	FALSE	FALSE
orfmaxLenuORFs30C	1343	0.12404	0.0119363	0.17	0.717	0.177873	0.731523	970	0.116103	0.00158274	0.908	0.928	0.911802	0.922438	0.215735	MIC not significant	FALSE	FALSE	FALSE	FALSE	FALSE	FALSE	FALSE	FALSE
orfmeanLenuORFs30C	1343	0.116164	0.00888645	0.551	0.904	0.551964	0.903741	970	0.110457	0.000121161	0.986	0.98	0.978426	0.971705	0.732058	MIC not significant	FALSE	FALSE	FALSE	FALSE	FALSE	FALSE	FALSE	FALSE
orfmaxCostuORFs30C	1343	0.117944	0.0115997	0.504	0.955	0.511072	0.946051	970	0.127525	0.00135447	0.674	0.684	0.675174	0.689139	0.252153	MIC not significant	FALSE	FALSE	FALSE	FALSE	FALSE	FALSE	FALSE	FALSE
orfmeanCostuORFs30C	1343	0.115582	0.00855574	0.63	0.955	0.654156	0.941655	970	0.1232	5.82144e-05	0.859	0.829	0.855569	0.827836	0.812403	MIC not significant	FALSE	FALSE	FALSE	FALSE	FALSE	FALSE	FALSE	FALSE
orfuORFs200C	1343	0.154503	0.0418307	0	0.695248	1.23471e-07	0.704364	1328	0.155548	0.0404973	1.31579e-05	0.623776	1.3924e-07	0.63516	1.33679e-13	non-significant monotone/non-monotone	TRUE	TRUE	FALSE	FALSE	TRUE	TRUE	FALSE	FALSE
orfmaxLenuORFs200C	1343	0.115605	0.00971723	0.579	0.957	0.614937	0.944274	1328	0.115715	0.00862752	0.66	0.952	0.687762	0.94592	0.000701453	MIC not significant	FALSE	FALSE	FALSE	FALSE	FALSE	FALSE	FALSE	FALSE
orfmeanLenuORFs200C	1343	0.119884	0.00159384	0.494	0.545	0.510925	0.563206	1328	0.118671	0.00108021	0.655	0.675	0.672562	0.690093	0.231342	MIC not significant	FALSE	FALSE	FALSE	FALSE	FALSE	FALSE	FALSE	FALSE
orfmaxCostuORFs200C	1343	0.121533	0.00967844	0.43	0.925	0.473192	0.90674	1328	0.122173	0.00858895	0.474	0.901	0.502137	0.888265	0.000721187	MIC not significant	FALSE	FALSE	FALSE	FALSE	FALSE	FALSE	FALSE	FALSE
orfmeanCostuORFs200C	1343	0.118253	0.00164197	0.668	0.711	0.673432	0.724654	1328	0.118245	0.00112041	0.74	0.77	0.750018	0.771944	0.222849	MIC not significant	FALSE	FALSE	FALSE	FALSE	FALSE	FALSE	FALSE	FALSE
orfuORFs0	1343	0.11841	0.0237569	0.425	1	0.444321	0.998459	1275	0.114402	0.0134011	0.756	0.996	0.766202	0.991769	3.42114e-05	MIC not significant	FALSE	FALSE	FALSE	FALSE	FALSE	FALSE	FALSE	FALSE
orfuORFs1	1343	0.134854	0.0344828	0.011	0.992	0.00926271	0.989435	1273	0.142821	0.035055	0.005	0.94	0.000898193	0.933537	1.65905e-11	non-significant monotone/non-monotone	FALSE	FALSE	FALSE	FALSE	FALSE	TRUE	FALSE	FALSE
orfuORFs2	1343	0.113298	0.0110928	0.672	0.979	0.690349	0.971413	1082	0.122413	0.00395269	0.729	0.843	0.721754	0.826729	0.0386682	MIC not significant	FALSE	FALSE	FALSE	FALSE	FALSE	FALSE	FALSE	FALSE
orfmaxLenuORFs0	1343	0.122476	0.0143195	0.215	0.899	0.230256	0.894202	1275	0.120832	0.00597399	0.446	0.734	0.474177	0.749977	0.00575743	MIC not significant	FALSE	FALSE	FALSE	FALSE	FALSE	FALSE	FALSE	FALSE
orfmaxLenuORFs1	1343	0.127407	5.80545e-05	0.09	0.077	0.0790297	0.0666398	1273	0.126986	0.000112236	0.156	0.132	0.153449	0.133492	0.705706	MIC not significant	FALSE	FALSE	FALSE	FALSE	FALSE	FALSE	FALSE	FALSE
orfmaxLenuORFs2	1343	0.120791	0.0123726	0.286	0.865	0.296314	0.865708	1082	0.144534	0.00518698	0.018	0.057	0.0162439	0.0530232	0.0178184	MIC not significant	FALSE	FALSE	FALSE	FALSE	FALSE	FALSE	FALSE	FALSE
orfmeanLenuORFs0	1343	0.128232	0.0130398	0.071	0.657	0.0655403	0.668316	1275	0.121625	0.00508607	0.515	0.779	0.550828	0.77851	0.0108572	MIC not significant	FALSE	FALSE	FALSE	FALSE	FALSE	FALSE	FALSE	FALSE
orfmeanLenuORFs1	1343	0.136501	0.0132331	0.009	0.194	0.00261647	0.198567	1273	0.145942	0.0216955	0.001	0.271	0.000134017	0.296121	1.29908e-07	non-significant monotone/non-monotone	FALSE	TRUE	FALSE	FALSE	TRUE	TRUE	FALSE	FALSE
orfmeanLenuORFs2	1343	0.114464	0.00770674	0.645	0.913	0.659474	0.91416	1082	0.138994	0.00127636	0.071	0.078	0.0703148	0.0755758	0.24032	MIC not significant	FALSE	FALSE	FALSE	FALSE	FALSE	FALSE	FALSE	FALSE
orfmaxCostuORFs0	1343	0.128041	0.0143834	0.112	0.851	0.116487	0.849428	1275	0.12367	0.00600951	0.481	0.777	0.484322	0.782054	0.00561411	MIC not significant	FALSE	FALSE	FALSE	FALSE	FALSE	FALSE	FALSE	FALSE
orfmaxCostuORFs1	1343	0.12401	0.000102745	0.224	0.204	0.231494	0.202525	1273	0.120616	6.21844e-05	0.581	0.529	0.594533	0.55107	0.778647	MIC not significant	FALSE	FALSE	FALSE	FALSE	FALSE	FALSE	FALSE	FALSE
orfmaxCostuORFs2	1343	0.113167	0.010567	0.763	0.993	0.771145	0.986231	1082	0.148167	0.0034665	0.012	0.022	0.00514076	0.0129338	0.0528521	MIC not significant	FALSE	FALSE	FALSE	FALSE	FALSE	TRUE	FALSE	FALSE
orfmeanCostuORFs0	1343	0.137127	0.0132588	0.015	0.275	0.00558073	0.278787	1275	0.133919	0.00523014	0.068	0.199	0.0600373	0.190867	0.00978945	MIC not significant	FALSE	FALSE	FALSE	FALSE	TRUE	FALSE	FALSE	FALSE
orfmeanCostuORFs1	1343	0.146453	0.0121996	0.000223684	0.0175	1.59105e-05	0.0100818	1273	0.148301	0.0202269	0.000552632	0.207934	8.1476e-05	0.21535	3.48242e-07	non-significant monotone/non-monotone	TRUE	TRUE	FALSE	FALSE	TRUE	TRUE	FALSE	FALSE
orfmeanCostuORFs2	1343	0.119988	0.00614534	0.389	0.716	0.414575	0.722496	1082	0.138978	0.000447726	0.111	0.101	0.112745	0.0976329	0.486873	MIC not significant	FALSE	FALSE	FALSE	FALSE	FALSE	FALSE	FALSE	FALSE
orfuORFs030C	1343	0.127848	0.00280676	0.042	0.063	0.0289948	0.053586	314	0.17935	0.000963827	0.271	0.24	0.30139	0.262863	0.583646	MIC not significant	FALSE	FALSE	FALSE	FALSE	FALSE	FALSE	FALSE	FALSE
orfuORFs130C	1343	0.109626	0.0125152	0.856	0.997	0.855405	0.995797	755	0.151845	0.0139916	0.099	0.459	0.0890645	0.461155	0.001129	MIC not significant	FALSE	FALSE	FALSE	FALSE	FALSE	FALSE	FALSE	FALSE
orfuORFs230C	1343	0.101952	0.00292159	0.907	0.957	0.895974	0.941456	199	0.285177	0.0204147	0.000144737	0.000407895	4.40438e-07	7.2468e-06	0.0440922	MIC not significant	FALSE	TRUE	FALSE	FALSE	FALSE	TRUE	FALSE	FALSE
orfmaxLenuORFs030C	1343	0.127848	0.00349327	0.032	0.07	0.0307213	0.0676777	314	0.191986	0.00527549	0.25	0.287	0.27766	0.321973	0.199276	MIC not significant	FALSE	FALSE	FALSE	FALSE	FALSE	FALSE	FALSE	FALSE
orfmaxLenuORFs130C	1343	0.112059	0.00648279	0.769	0.947	0.776606	0.942938	755	0.12771	0.00029805	0.836	0.813	0.839517	0.814462	0.635771	MIC not significant	FALSE	FALSE	FALSE	FALSE	FALSE	FALSE	FALSE	FALSE
orfmaxLenuORFs230C	1343	0.101952	0.00270353	0.912	0.948	0.900064	0.941113	199	0.202354	0.000255502	0.308	0.255	0.314634	0.250694	0.822694	MIC not significant	FALSE	FALSE	FALSE	FALSE	FALSE	FALSE	FALSE	FALSE
orfmeanLenuORFs030C	1343	0.127848	0.0034921	0.044	0.081	0.0398527	0.0842725	314	0.191986	0.00524392	0.263	0.299	0.279838	0.320717	0.20063	MIC not significant	FALSE	FALSE	FALSE	FALSE	FALSE	FALSE	FALSE	FALSE
orfmeanLenuORFs130C	1343	0.111798	0.00453926	0.738	0.87	0.757886	0.883373	755	0.137626	0.00049668	0.533	0.511	0.555527	0.523597	0.540916	MIC not significant	FALSE	FALSE	FALSE	FALSE	FALSE	FALSE	FALSE	FALSE
orfmeanLenuORFs230C	1343	0.101952	0.00265811	0.915	0.957	0.905726	0.944304	199	0.202354	8.5297e-06	0.311	0.259	0.338558	0.271935	0.967344	MIC not significant	FALSE	FALSE	FALSE	FALSE	FALSE	FALSE	FALSE	FALSE
orfmaxCostuORFs030C	1343	0.127848	0.00345576	0.028	0.062	0.0259315	0.0583497	314	0.187278	0.00464813	0.434	0.455	0.449215	0.483803	0.228188	MIC not significant	FALSE	FALSE	FALSE	FALSE	FALSE	FALSE	FALSE	FALSE
orfmaxCostuORFs130C	1343	0.114485	0.00645756	0.661	0.899	0.668101	0.891642	755	0.130227	0.000281442	0.904	0.88	0.891859	0.870014	0.645348	MIC not significant	FALSE	FALSE	FALSE	FALSE	FALSE	FALSE	FALSE	FALSE
orfmaxCostuORFs230C	1343	0.101952	0.00257669	0.91	0.955	0.906426	0.94436	199	0.185245	0.000438088	0.762	0.693	0.771955	0.70593	0.76919	MIC not significant	FALSE	FALSE	FALSE	FALSE	FALSE	FALSE	FALSE	FALSE
orfmeanCostuORFs030C	1343	0.127848	0.00345935	0.035	0.072	0.0271453	0.0609447	314	0.187278	0.00469348	0.432	0.459	0.452812	0.489982	0.225928	MIC not significant	FALSE	FALSE	FALSE	FALSE	FALSE	FALSE	FALSE	FALSE
orfmeanCostuORFs130C	1343	0.115125	0.00443301	0.601	0.791	0.622545	0.803541	755	0.127724	0.000607075	0.958	0.949	0.945512	0.93749	0.499047	MIC not significant	FALSE	FALSE	FALSE	FALSE	FALSE	FALSE	FALSE	FALSE
orfmeanCostuORFs230C	1343	0.101952	0.0025323	0.912	0.95	0.903153	0.941224	199	0.196922	0.00116099	0.563	0.5	0.595945	0.525771	0.632811	MIC not significant	FALSE	FALSE	FALSE	FALSE	FALSE	FALSE	FALSE	FALSE
orfuORFs0200C	1343	0.145784	0.00634721	0.00025	0.00196053	3.63888e-05	0.000704763	1214	0.143169	0.00295171	0.003	0.009	0.00193044	0.00466537	0.0584337	Non-monotone	TRUE	TRUE	FALSE	FALSE	TRUE	TRUE	FALSE	FALSE
orfuORFs1200C	1343	0.162187	0.0456774	0	0.481851	1.97e-10	0.49801	1318	0.160769	0.0417162	0	0.444436	7.05989e-09	0.459795	7.04621e-14	non-significant monotone/non-monotone	TRUE	TRUE	FALSE	FALSE	TRUE	TRUE	FALSE	FALSE
orfuORFs2200C	1343	0.114109	0.00380112	0.656	0.804	0.665521	0.80391	819	0.14607	0.00637614	0.113	0.232	0.114482	0.250843	0.0222927	MIC not significant	FALSE	FALSE	FALSE	FALSE	FALSE	FALSE	FALSE	FALSE
orfmaxLenuORFs0200C	1343	0.115605	0.00970719	0.565	0.939	0.590523	0.936096	1214	0.124661	0.00613277	0.339	0.624	0.364241	0.651253	0.00633404	MIC not significant	FALSE	FALSE	FALSE	FALSE	FALSE	FALSE	FALSE	FALSE
orfmaxLenuORFs1200C	1343	0.11692	3.72073e-05	0.5	0.467	0.51059	0.471741	1318	0.118002	0.000597096	0.532	0.524	0.558279	0.547705	0.375399	MIC not significant	FALSE	FALSE	FALSE	FALSE	FALSE	FALSE	FALSE	FALSE
orfmaxLenuORFs2200C	1343	0.106452	0.00306955	0.946	0.974	0.941033	0.97009	819	0.144035	0.00359504	0.141	0.2	0.149245	0.209272	0.0863765	MIC not significant	FALSE	FALSE	FALSE	FALSE	FALSE	FALSE	FALSE	FALSE
orfmeanLenuORFs0200C	1343	0.125042	0.00916192	0.152	0.628	0.15992	0.635972	1214	0.13136	0.00561325	0.138	0.327	0.141992	0.351572	0.00901621	MIC not significant	FALSE	FALSE	FALSE	FALSE	FALSE	FALSE	FALSE	FALSE
orfmeanLenuORFs1200C	1343	0.130381	0.00941141	0.034	0.245	0.0281391	0.249596	1318	0.13376	0.0141904	0.024	0.407	0.0192265	0.432265	1.45074e-05	non-significant monotone/non-monotone	FALSE	FALSE	FALSE	FALSE	FALSE	FALSE	FALSE	FALSE
orfmeanLenuORFs2200C	1343	0.107816	0.00207706	0.928	0.949	0.914396	0.939522	819	0.155193	0.0011229	0.022	0.018	0.015173	0.0148426	0.338168	MIC not significant	FALSE	FALSE	FALSE	FALSE	FALSE	FALSE	FALSE	FALSE
orfmaxCostuORFs0200C	1343	0.121533	0.00966112	0.386	0.887	0.411402	0.877501	1214	0.124967	0.00607858	0.508	0.808	0.539521	0.80458	0.00657091	MIC not significant	FALSE	FALSE	FALSE	FALSE	FALSE	FALSE	FALSE	FALSE
orfmaxCostuORFs1200C	1343	0.125436	4.19662e-05	0.151	0.131	0.162742	0.137267	1318	0.125863	0.000618683	0.263	0.253	0.263117	0.256651	0.366902	MIC not significant	FALSE	FALSE	FALSE	FALSE	FALSE	FALSE	FALSE	FALSE
orfmaxCostuORFs2200C	1343	0.109993	0.0028434	0.849	0.916	0.848674	0.908747	819	0.139511	0.0029421	0.339	0.414	0.361152	0.430181	0.120889	MIC not significant	FALSE	FALSE	FALSE	FALSE	FALSE	FALSE	FALSE	FALSE
orfmeanCostuORFs0200C	1343	0.128046	0.00912632	0.114	0.522	0.10868	0.550497	1214	0.131786	0.005573	0.189	0.398	0.195831	0.431544	0.00926732	MIC not significant	FALSE	FALSE	FALSE	FALSE	FALSE	FALSE	FALSE	FALSE
orfmeanCostuORFs1200C	1343	0.134387	0.00888763	0.022	0.179	0.0134798	0.17896	1318	0.138171	0.0135256	0.012	0.311	0.00816169	0.337701	2.31072e-05	non-significant monotone/non-monotone	FALSE	FALSE	FALSE	FALSE	FALSE	FALSE	FALSE	FALSE
orfmeanCostuORFs2200C	1343	0.108435	0.00173375	0.895	0.931	0.89675	0.920839	819	0.147239	0.000527171	0.124	0.111	0.117577	0.100417	0.51172	MIC not significant	FALSE	FALSE	FALSE	FALSE	FALSE	FALSE	FALSE	FALSE
rorf5bestATG	1339	0.183644	0.0929643	0	1	2.1416e-23	0.999999	1339	0.183644	0.0929643	0	1	2.23641e-23	0.999999	3.33756e-30	Monotone	TRUE	TRUE	FALSE	TRUE	TRUE	TRUE	FALSE	TRUE
rorfMeanATG	1339	0.172741	0.0908717	0	1	1.87435e-16	1	1339	0.172741	0.0908717	0	1	1.79069e-16	1	0	Monotone	TRUE	TRUE	FALSE	TRUE	TRUE	TRUE	FALSE	TRUE
rorf5bestATG30C	1339	0.153624	0.0539172	2.63158e-05	0.999961	1.55484e-07	0.9996	1337	0.150388	0.0531414	9.21053e-05	0.999987	2.4395e-06	0.999913	1.38391e-17	Monotone	TRUE	TRUE	FALSE	TRUE	TRUE	TRUE	FALSE	TRUE
rorfMeanATG30C	1339	0.152636	0.0527846	2.63158e-05	0.999974	3.20523e-07	0.999576	1337	0.15361	0.0520141	1.31579e-05	0.999855	1.78156e-07	0.998929	3.09448e-17	Monotone	TRUE	TRUE	FALSE	TRUE	TRUE	TRUE	FALSE	TRUE
rorf5bestATG200C	1339	0.174135	0.089722	0	1	2.60081e-17	1	1339	0.174135	0.089722	0	1	2.1691e-17	1	3.68935e-29	Monotone	TRUE	TRUE	FALSE	TRUE	TRUE	TRUE	FALSE	TRUE
rorfMeanATG200C	1339	0.169895	0.0844491	0	1	7.84555e-15	1	1339	0.169895	0.0844491	0	1	6.48369e-15	1	0	Monotone	TRUE	TRUE	FALSE	TRUE	TRUE	TRUE	FALSE	TRUE
rorfbestATG0	1339	0.1613	0.0605484	0	0.999891	1.23681e-10	0.999289	1338	0.160708	0.0598809	1.31579e-05	0.999908	2.6531e-10	0.999271	1.07531e-19	Monotone	TRUE	TRUE	FALSE	TRUE	TRUE	TRUE	FALSE	TRUE
rorfMeanATG0	1339	0.159607	0.0606013	0	0.99997	6.81063e-10	0.999744	1338	0.160187	0.0599322	0	0.999901	5.18676e-10	0.999488	1.03638e-19	Monotone	TRUE	TRUE	FALSE	TRUE	TRUE	TRUE	FALSE	TRUE
rorfbestATG1	1339	0.175905	0.0978544	0	1	3.28998e-18	1	1338	0.17549	0.0971174	0	1	7.33059e-18	1	1.59971e-31	Monotone	TRUE	TRUE	FALSE	TRUE	TRUE	TRUE	FALSE	TRUE
rorfMeanATG1	1339	0.17265	0.0941206	0	1	2.14265e-16	1	1338	0.172271	0.0933881	0	1	2.97519e-16	1	2.55994e-30	Monotone	TRUE	TRUE	FALSE	TRUE	TRUE	TRUE	FALSE	TRUE
rorfbestATG2	1339	0.15236	0.0600277	5.26316e-05	1	4.796e-07	0.999997	1338	0.152154	0.0592572	4.9505e-05	1	5.5427e-07	0.999996	1.68316e-19	Monotone	TRUE	TRUE	FALSE	TRUE	TRUE	TRUE	FALSE	TRUE
rorfMeanATG2	1339	0.155122	0.0612187	1.31579e-05	1	4.20448e-08	0.999991	1338	0.156332	0.0604423	0	1	1.71842e-08	0.999965	7.18206e-20	Monotone	TRUE	TRUE	FALSE	TRUE	TRUE	TRUE	FALSE	TRUE
rorfbestATG030C	1339	0.150275	0.0484691	6.57895e-05	0.999697	1.81872e-06	0.998316	1338	0.149247	0.0477523	6.57895e-05	0.999789	3.86365e-06	0.998658	6.28283e-16	Monotone	TRUE	TRUE	FALSE	TRUE	TRUE	TRUE	FALSE	TRUE
rorfMeanATG030C	1339	0.150275	0.0484856	0.001	0.999	2.01813e-06	0.998424	1338	0.149247	0.0477687	9.21053e-05	0.999855	4.11458e-06	0.998677	6.21019e-16	Monotone	TRUE	TRUE	FALSE	TRUE	TRUE	TRUE	FALSE	TRUE
rorfbestATG130C	1339	0.144465	0.0445656	0.000631579	0.999947	0.000112289	0.999509	1337	0.14269	0.0438298	0.00194737	0.999987	0.000383589	0.999741	1.04389e-14	Monotone	TRUE	TRUE	FALSE	TRUE	TRUE	TRUE	FALSE	TRUE
rorfMeanATG130C	1339	0.148286	0.0439016	0.000171053	0.998474	8.0239e-06	0.995243	1337	0.147638	0.0431697	0.000276316	0.998461	1.71531e-05	0.995108	1.66693e-14	Monotone	TRUE	TRUE	FALSE	TRUE	TRUE	TRUE	FALSE	TRUE
rorfbestATG230C	1339	0.15933	0.057759	0	0.999733	4.63299e-10	0.998497	1338	0.159653	0.056998	0	0.999406	4.25596e-10	0.997425	8.51595e-19	Monotone	TRUE	TRUE	FALSE	TRUE	TRUE	TRUE	FALSE	TRUE
rorfMeanATG230C	1339	0.15933	0.0577153	0	0.999703	4.48247e-10	0.998485	1338	0.159653	0.0569546	0	0.999376	4.11852e-10	0.997429	8.78545e-19	Monotone	TRUE	TRUE	FALSE	TRUE	TRUE	TRUE	FALSE	TRUE
rorfbestATG0200C	1339	0.151935	0.0468639	2.63158e-05	0.997842	6.20356e-07	0.993929	1338	0.152139	0.0462517	3.94737e-05	0.996724	5.81838e-07	0.991488	1.82688e-15	Monotone	TRUE	TRUE	FALSE	TRUE	TRUE	TRUE	FALSE	TRUE
rorfMeanATG0200C	1339	0.147446	0.0475948	0.000394737	1	1.91268e-05	0.999573	1338	0.147053	0.046981	0.000355263	0.999947	2.5348e-05	0.999542	1.08765e-15	Monotone	TRUE	TRUE	FALSE	TRUE	TRUE	TRUE	FALSE	TRUE
rorfbestATG1200C	1339	0.167323	0.0810106	0	1	1.56971e-13	1	1338	0.166816	0.0803189	0	1	2.83223e-13	1	3.91382e-26	Monotone	TRUE	TRUE	FALSE	TRUE	TRUE	TRUE	FALSE	TRUE
rorfMeanATG1200C	1339	0.157515	0.0781207	0	1	5.28526e-09	1	1338	0.156981	0.0774352	9.90099e-06	1	1.03543e-08	1	3.22555e-25	Monotone	TRUE	TRUE	FALSE	TRUE	TRUE	TRUE	FALSE	TRUE
rorfbestATG2200C	1339	0.139915	0.0253524	0.004	0.843	0.001305	0.842537	1338	0.139715	0.0247976	0.007	0.826	0.00179314	0.82995	7.00003e-09	non-significant monotone/non-monotone	TRUE	FALSE	FALSE	FALSE	TRUE	TRUE	FALSE	FALSE
rorfMeanATG2200C	1339	0.134869	0.0250876	0.031	0.973	0.0155199	0.959416	1338	0.134775	0.0245349	0.025	0.957	0.018222	0.949086	8.42273e-09	Monotone	FALSE	FALSE	FALSE	FALSE	FALSE	FALSE	FALSE	FALSE
orftAI	1343	0.502521	0.595209	0	1	0	1	1343	0.502521	0.595209	0	1	0	1	0	Monotone	TRUE	TRUE	FALSE	TRUE	TRUE	TRUE	FALSE	TRUE
orfCAI	1343	0.502507	0.58362	0	1	0	1	1343	0.502507	0.58362	0	1	0	1	0	Monotone	TRUE	TRUE	FALSE	TRUE	TRUE	TRUE	FALSE	TRUE
scATGcs	1339	0.155903	0.0678087	1.9802e-05	1	1.27365e-08	1	1339	0.155903	0.0678087	2.9703e-05	1	1.3182e-08	1	3.41138e-22	Monotone	TRUE	TRUE	FALSE	TRUE	TRUE	TRUE	FALSE	TRUE
TASEPCsct	1267	0.331608	0.321074	0	1	1.8555e-220	1	1267	0.331608	0.321074	0	1	1.33994e-221	1	1.67643e-108	Monotone	TRUE	TRUE	FALSE	TRUE	TRUE	TRUE	FALSE	TRUE
orf_PARS_numBP_all	1140	0.136474	0.00926074	0.138	0.496	0.132853	0.527142	1140	0.136474	0.00926074	0.114	0.477	0.120277	0.5109	0.00114121	MIC not significant	FALSE	FALSE	FALSE	FALSE	FALSE	FALSE	FALSE	FALSE
orfdn	775	0.292342	0.277486	0	1	4.75583e-57	1	774	0.293013	0.277035	0	1	9.31625e-58	1	0	Monotone	TRUE	TRUE	FALSE	TRUE	TRUE	TRUE	FALSE	TRUE
orfdsAdj	775	0.146418	0.0134596	0.458	0.912	0.477773	0.900474	775	0.146418	0.0134596	0.467	0.911	0.483736	0.897616	0.00121451	MIC not significant	FALSE	FALSE	FALSE	FALSE	FALSE	FALSE	FALSE	FALSE
orfdn_dsAdj	775	0.286864	0.28153	0	1	9.77793e-53	1	774	0.287024	0.281097	0	1	6.28068e-53	1	0	Monotone	TRUE	TRUE	FALSE	TRUE	TRUE	TRUE	FALSE	TRUE
utr3gc	1343	0.138617	0.0292618	0.007	0.884	0.000996775	0.879929	1342	0.138601	0.0292151	0.006	0.892	0.00162959	0.874936	2.93598e-10	non-significant monotone/non-monotone	FALSE	FALSE	FALSE	FALSE	TRUE	TRUE	FALSE	FALSE
utr3gc40	1343	0.125333	0.00760475	0.146	0.412	0.135421	0.429542	1342	0.125477	0.00756555	0.109	0.383	0.117043	0.399303	0.00142544	MIC not significant	FALSE	FALSE	FALSE	FALSE	FALSE	FALSE	FALSE	FALSE
utr3meanFE	1271	0.128255	0.0138384	0.233	0.918	0.254058	0.903968	1271	0.128255	0.0138384	0.231	0.92	0.24371	0.908685	2.61827e-05	MIC not significant	FALSE	FALSE	FALSE	FALSE	FALSE	FALSE	FALSE	FALSE
utr3meanFE40	1271	0.125261	0.00367017	0.228	0.321	0.225629	0.359376	1271	0.125261	0.00367017	0.25	0.391	0.248746	0.383308	0.0307981	MIC not significant	FALSE	FALSE	FALSE	FALSE	FALSE	FALSE	FALSE	FALSE
utr3bestATG	1343	0.10967	0.000993486	0.941	0.945	0.929935	0.935306	1100	0.116676	0.00232453	0.96	0.981	0.958112	0.97344	0.110005	MIC not significant	FALSE	FALSE	FALSE	FALSE	FALSE	FALSE	FALSE	FALSE
utr3MeanATG	1343	0.113504	0.00126441	0.828	0.843	0.822005	0.842988	1100	0.12987	0.00293291	0.482	0.599	0.502942	0.612732	0.072584	MIC not significant	FALSE	FALSE	FALSE	FALSE	FALSE	FALSE	FALSE	FALSE
utr3bestATG0	1343	0.104219	0.00347873	0.985	0.995	0.972416	0.989838	679	0.136087	0.00240906	0.957	0.967	0.943614	0.953322	0.201468	MIC not significant	FALSE	FALSE	FALSE	FALSE	FALSE	FALSE	FALSE	FALSE
utr3MeanATG0	1343	0.104219	0.00357926	0.987	0.997	0.973594	0.990846	679	0.13507	0.00272964	0.976	0.98	0.960285	0.969617	0.173885	MIC not significant	FALSE	FALSE	FALSE	FALSE	FALSE	FALSE	FALSE	FALSE
utr3bestATG1	1343	0.119714	0.000190438	0.341	0.324	0.365607	0.337006	630	0.144749	0.00569207	0.685	0.835	0.713114	0.830558	0.0584096	MIC not significant	FALSE	FALSE	FALSE	FALSE	FALSE	FALSE	FALSE	FALSE
utr3MeanATG1	1343	0.119714	0.000157189	0.359	0.326	0.379352	0.343221	630	0.155561	0.006523	0.319	0.503	0.339759	0.521598	0.0427164	MIC not significant	FALSE	FALSE	FALSE	FALSE	FALSE	FALSE	FALSE	FALSE
utr3bestATG2	1343	0.113702	0.00294097	0.693	0.802	0.702881	0.801522	666	0.134701	4.13712e-05	0.945	0.927	0.934588	0.912845	0.868408	MIC not significant	FALSE	FALSE	FALSE	FALSE	FALSE	FALSE	FALSE	FALSE
utr3MeanATG2	1343	0.113702	0.00290094	0.704	0.806	0.708326	0.801573	666	0.142798	5.86983e-05	0.777	0.717	0.776186	0.727627	0.843553	MIC not significant	FALSE	FALSE	FALSE	FALSE	FALSE	FALSE	FALSE	FALSE
utr3numATGs	1343	0.11348	0.000142479	0.65	0.621	0.667623	0.634936	1100	0.125234	0.00025818	0.471	0.438	0.48746	0.456081	0.594489	MIC not significant	FALSE	FALSE	FALSE	FALSE	FALSE	FALSE	FALSE	FALSE
utr3numATGs0	1343	0.106953	0.00232153	0.931	0.96	0.925613	0.952889	679	0.143346	3.56145e-05	0.535	0.495	0.564505	0.516105	0.876647	MIC not significant	FALSE	FALSE	FALSE	FALSE	FALSE	FALSE	FALSE	FALSE
utr3numATGs1	1343	0.119714	0.00149284	0.387	0.415	0.373566	0.413158	630	0.135892	0.000881192	0.755	0.732	0.761385	0.742417	0.457016	MIC not significant	FALSE	FALSE	FALSE	FALSE	FALSE	FALSE	FALSE	FALSE
utr3numATGs2	1343	0.113702	0.00318952	0.647	0.766	0.666051	0.781446	666	0.145826	4.67959e-06	0.38	0.342	0.4014	0.353426	0.955563	MIC not significant	FALSE	FALSE	FALSE	FALSE	FALSE	FALSE	FALSE	FALSE
utr3distATG	1343	0.137218	0.00415578	0.004	0.015	0.00239583	0.00968907	1100	0.15528	0.00933696	0.000644737	0.00973684	8.91503e-05	0.00470524	0.00133358	Non-monotone	TRUE	TRUE	FALSE	FALSE	TRUE	TRUE	FALSE	FALSE
utr3distATG0	1343	0.108104	0.00777155	0.911	0.995	0.902995	0.988611	679	0.152693	0.0232228	0.329	0.967	0.361907	0.95498	6.69366e-05	MIC not significant	FALSE	FALSE	FALSE	FALSE	FALSE	FALSE	FALSE	FALSE
utr3distATG1	1343	0.119714	0.000621077	0.371	0.367	0.388869	0.382783	630	0.159341	0.000817832	0.129	0.118	0.132568	0.116385	0.473671	MIC not significant	FALSE	FALSE	FALSE	FALSE	FALSE	FALSE	FALSE	FALSE
utr3distATG2	1343	0.114347	0.00180421	0.64	0.696	0.659429	0.71162	666	0.171887	0.00280035	0.008	0.015	0.00491206	0.0068896	0.172551	MIC not significant	FALSE	FALSE	FALSE	FALSE	FALSE	TRUE	FALSE	FALSE
utr3Lens	1343	0.117127	0.0036051	0.505	0.664	0.51347	0.66938	1342	0.117298	0.00365453	0.49	0.666	0.499758	0.662471	0.0267912	MIC not significant	FALSE	FALSE	FALSE	FALSE	FALSE	FALSE	FALSE	FALSE
utr3uORFs	1343	0.116365	4.39559e-06	0.505	0.453	0.519338	0.479794	510	0.165886	0.00130382	0.269	0.269	0.287245	0.2718	0.415812	MIC not significant	FALSE	FALSE	FALSE	FALSE	FALSE	FALSE	FALSE	FALSE
u3maxLenuORFs	1343	0.116365	4.59589e-06	0.487	0.437	0.500178	0.458662	510	0.146378	0.00374912	0.816	0.859	0.817427	0.853736	0.16738	MIC not significant	FALSE	FALSE	FALSE	FALSE	FALSE	FALSE	FALSE	FALSE
u3meanLenuORFs	1343	0.116365	3.57448e-08	0.503	0.467	0.514955	0.474743	510	0.163802	0.0023338	0.351	0.368	0.373827	0.38746	0.27618	MIC not significant	FALSE	FALSE	FALSE	FALSE	FALSE	FALSE	FALSE	FALSE
u3maxCostuORFs	1343	0.116365	3.02516e-08	0.494	0.455	0.503442	0.45905	510	0.1439	0.00243603	0.966	0.965	0.943787	0.947705	0.265896	MIC not significant	FALSE	FALSE	FALSE	FALSE	FALSE	FALSE	FALSE	FALSE
u3meanCostuORFs	1343	0.116365	5.62025e-06	0.508	0.471	0.526718	0.484828	510	0.16304	0.00123641	0.502	0.479	0.532696	0.505776	0.428138	MIC not significant	FALSE	FALSE	FALSE	FALSE	FALSE	FALSE	FALSE	FALSE
utr3uORFs0	1343	0.106435	1.94369e-06	0.933	0.911	0.923456	0.907611	436	0.170424	0.00118902	0.31	0.284	0.339422	0.312255	0.472662	MIC not significant	FALSE	FALSE	FALSE	FALSE	FALSE	FALSE	FALSE	FALSE
utr3uORFs1	1343	0.114659	0.000369261	0.504	0.481	0.522707	0.503211	396	0.162272	0.00231758	0.632	0.63	0.652316	0.650271	0.339313	MIC not significant	FALSE	FALSE	FALSE	FALSE	FALSE	FALSE	FALSE	FALSE
utr3uORFs2	1343	0.11659	0.00118429	0.444	0.464	0.472028	0.494749	440	0.162907	5.63481e-05	0.485	0.425	0.506033	0.449613	0.875235	MIC not significant	FALSE	FALSE	FALSE	FALSE	FALSE	FALSE	FALSE	FALSE
u3maxLenuORFs0	1343	0.106435	1.16182e-05	0.907	0.89	0.907356	0.891209	436	0.133149	0.00463066	0.993	0.995	0.982649	0.987824	0.156054	MIC not significant	FALSE	FALSE	FALSE	FALSE	FALSE	FALSE	FALSE	FALSE
u3maxLenuORFs1	1343	0.114659	0.000198316	0.529	0.511	0.557181	0.526755	396	0.183965	1.49225e-05	0.2	0.163	0.205172	0.163349	0.938919	MIC not significant	FALSE	FALSE	FALSE	FALSE	FALSE	FALSE	FALSE	FALSE
u3maxLenuORFs2	1343	0.11659	0.00123268	0.478	0.504	0.485218	0.514467	440	0.149228	0.000154585	0.857	0.817	0.850268	0.812837	0.79481	MIC not significant	FALSE	FALSE	FALSE	FALSE	FALSE	FALSE	FALSE	FALSE
u3meanLenuORFs0	1343	0.106435	8.78e-07	0.928	0.907	0.909282	0.891087	436	0.143015	0.00249196	0.931	0.93	0.918252	0.919017	0.298337	MIC not significant	FALSE	FALSE	FALSE	FALSE	FALSE	FALSE	FALSE	FALSE
u3meanLenuORFs1	1343	0.114659	0.000210395	0.518	0.492	0.537245	0.50628	396	0.179703	7.61444e-10	0.253	0.208	0.275355	0.222408	0.999563	MIC not significant	FALSE	FALSE	FALSE	FALSE	FALSE	FALSE	FALSE	FALSE
u3meanLenuORFs2	1343	0.11659	0.00117812	0.456	0.477	0.47975	0.504261	440	0.146945	2.42979e-05	0.889	0.856	0.875716	0.845631	0.91788	MIC not significant	FALSE	FALSE	FALSE	FALSE	FALSE	FALSE	FALSE	FALSE
u3maxCostuORFs0	1343	0.106435	1.00377e-06	0.918	0.9	0.918676	0.902941	436	0.162887	0.00244476	0.689	0.688	0.691204	0.695888	0.302964	MIC not significant	FALSE	FALSE	FALSE	FALSE	FALSE	FALSE	FALSE	FALSE
u3maxCostuORFs1	1343	0.114659	0.000177321	0.53	0.501	0.54866	0.51536	396	0.19701	0.000120771	0.075	0.059	0.0698406	0.0460387	0.827425	MIC not significant	FALSE	FALSE	FALSE	FALSE	FALSE	FALSE	FALSE	FALSE
u3maxCostuORFs2	1343	0.11659	0.00113783	0.459	0.484	0.477041	0.500796	440	0.181649	3.62557e-06	0.159	0.127	0.176003	0.136255	0.968231	MIC not significant	FALSE	FALSE	FALSE	FALSE	FALSE	FALSE	FALSE	FALSE
u3meanCostuORFs0	1343	0.106435	2.63918e-06	0.925	0.9	0.914097	0.899244	436	0.166817	0.000911703	0.554	0.518	0.587544	0.549852	0.529473	MIC not significant	FALSE	FALSE	FALSE	FALSE	FALSE	FALSE	FALSE	FALSE
u3meanCostuORFs1	1343	0.114659	0.000180364	0.534	0.501	0.562886	0.531154	396	0.19223	9.72897e-05	0.125	0.106	0.129249	0.100811	0.844871	MIC not significant	FALSE	FALSE	FALSE	FALSE	FALSE	FALSE	FALSE	FALSE
u3meanCostuORFs2	1343	0.11659	0.00107531	0.494	0.51	0.507116	0.524028	440	0.174401	4.4048e-05	0.309	0.256	0.322838	0.266352	0.889591	MIC not significant	FALSE	FALSE	FALSE	FALSE	FALSE	FALSE	FALSE	FALSE
rutr3bestATG	1339	0.121934	0.0129249	0.436	0.977	0.46587	0.965504	1338	0.121616	0.0126299	0.486	0.984	0.5027	0.968277	3.78819e-05	MIC not significant	FALSE	FALSE	FALSE	FALSE	FALSE	FALSE	FALSE	FALSE
rutr3MeanATG	1339	0.136179	0.0141719	0.011	0.419	0.00853064	0.433561	1338	0.136005	0.0138641	0.015	0.397	0.0103382	0.42158	1.57451e-05	non-significant monotone/non-monotone	FALSE	FALSE	FALSE	FALSE	FALSE	FALSE	FALSE	FALSE
rutr3bestATG0	1339	0.1093	0.00364145	0.981	0.997	0.968935	0.99056	1338	0.108965	0.00347537	0.987	0.998	0.97483	0.991787	0.0310636	MIC not significant	FALSE	FALSE	FALSE	FALSE	FALSE	FALSE	FALSE	FALSE
rutr3MeanATG0	1339	0.118524	0.00383418	0.637	0.83	0.664834	0.821823	1338	0.118195	0.003664	0.674	0.838	0.685812	0.834928	0.0268215	MIC not significant	FALSE	FALSE	FALSE	FALSE	FALSE	FALSE	FALSE	FALSE
rutr3bestATG1	1339	0.132569	0.0188179	0.044	0.88	0.0406158	0.86897	1338	0.132174	0.0183393	0.043	0.864	0.0415674	0.863309	6.63111e-07	non-significant monotone/non-monotone	FALSE	FALSE	FALSE	FALSE	FALSE	FALSE	FALSE	FALSE
rutr3MeanATG1	1339	0.12922	0.0190131	0.098	0.963	0.0952594	0.948491	1338	0.128822	0.0185324	0.129	0.963	0.116459	0.949224	5.78606e-07	MIC not significant	FALSE	FALSE	FALSE	FALSE	FALSE	FALSE	FALSE	FALSE
rutr3bestATG2	1339	0.133506	0.0259265	0.029	0.99	0.0237451	0.983727	1338	0.133027	0.0253804	0.044	0.99	0.0379024	0.978332	4.64419e-09	Monotone	FALSE	FALSE	FALSE	FALSE	FALSE	FALSE	FALSE	FALSE
rutr3MeanATG2	1339	0.130839	0.0264116	0.071	0.999	0.0645272	0.994107	1338	0.130358	0.0258613	0.0825263	0.9985	0.0774188	0.995064	3.31014e-09	MIC not significant	FALSE	FALSE	FALSE	FALSE	FALSE	FALSE	FALSE	FALSE
utr3_PARS_numBP_all	1139	0.131811	0.00245394	0.22	0.27	0.218308	0.284088	941	0.138608	0.000112604	0.271	0.24	0.272199	0.237857	0.745112	MIC not significant	FALSE	FALSE	FALSE	FALSE	FALSE	FALSE	FALSE	FALSE
utr5MeanPARS	1140	0.166517	0.00136493	9.90099e-06	9.90099e-06	7.17799e-08	1.02167e-07	1140	0.166517	0.00136493	2.63158e-05	2.63158e-05	5.95466e-08	8.23064e-08	0.212595	Non-monotone	TRUE	TRUE	TRUE	FALSE	TRUE	TRUE	TRUE	FALSE
orfMeanPARS	1140	0.353174	0.349126	0	1	1.30804e-221	1	1140	0.353174	0.349126	0	1	2.82226e-221	1	0	Monotone	TRUE	TRUE	FALSE	TRUE	TRUE	TRUE	FALSE	TRUE
utr3MeanPARS	1139	0.167902	0.00823349	0	7.92079e-05	1.86871e-08	3.99669e-06	1139	0.167902	0.00823349	0	5.94059e-05	1.7927e-08	3.88227e-06	0.00217447	Non-monotone	TRUE	TRUE	TRUE	FALSE	TRUE	TRUE	TRUE	FALSE
seqMeanPARS	1140	0.324957	0.297404	0	1	2.61129e-170	1	1140	0.324957	0.297404	0	1	3.52316e-169	1	0	Monotone	TRUE	TRUE	FALSE	TRUE	TRUE	TRUE	FALSE	TRUE
wutr5MeanPARS	1140	0.208556	0.141465	0	1	1.49414e-29	1	1140	0.208556	0.141465	0	1	2.4859e-29	1	1.27222e-39	Monotone	TRUE	TRUE	FALSE	TRUE	TRUE	TRUE	FALSE	TRUE
worfMeanPARS	1140	0.413004	0.492852	0	1	0	1	1140	0.413004	0.492852	0	1	0	1	0	Monotone	TRUE	TRUE	FALSE	TRUE	TRUE	TRUE	FALSE	TRUE
wutr3MeanPARS	1139	0.232694	0.186187	0	1	2.6048e-49	1	1139	0.232694	0.186187	0	1	5.3704e-49	1	7.42256e-53	Monotone	TRUE	TRUE	FALSE	TRUE	TRUE	TRUE	FALSE	TRUE
wseqMeanPARS	1140	0.424384	0.500075	0	1	0	1	1140	0.424384	0.500075	0	1	0	1	0	Monotone	TRUE	TRUE	FALSE	TRUE	TRUE	TRUE	FALSE	TRUE
pars40	1140	0.176604	0.0569742	0	0.896515	7.59804e-12	0.888443	1140	0.176604	0.0569742	0	0.895356	7.94556e-12	0.887118	3.11718e-16	non-significant monotone/non-monotone	TRUE	TRUE	FALSE	FALSE	TRUE	TRUE	FALSE	FALSE
u540pars	1140	0.161397	5.15696e-06	9.21053e-05	3.94737e-05	2.36728e-06	1.25549e-06	1140	0.161397	5.15696e-06	0.000131579	0.000105263	2.24169e-06	1.18914e-06	0.93895	Non-monotone	TRUE	TRUE	TRUE	FALSE	TRUE	TRUE	TRUE	FALSE
u540pars40	1140	0.174365	0.032469	0	0.0350495	7.20279e-11	0.0269092	1140	0.174365	0.032469	0	0.0351782	7.90274e-11	0.027144	8.92614e-10	Non-monotone	TRUE	TRUE	FALSE	FALSE	TRUE	TRUE	FALSE	FALSE
u5pars40	1140	0.173219	0.0381622	0	0.169089	2.51407e-10	0.17324	1140	0.173219	0.0381622	0	0.16802	2.21607e-10	0.172921	2.87588e-11	non-significant monotone/non-monotone	TRUE	TRUE	FALSE	FALSE	TRUE	TRUE	FALSE	FALSE
u5parsOrf	1140	0.339449	0.324766	0	1	3.35823e-196	1	1140	0.339449	0.324766	0	1	3.52532e-195	1	0	Monotone	TRUE	TRUE	FALSE	TRUE	TRUE	TRUE	FALSE	TRUE
wpars40	1140	0.277845	0.253269	0	1	3.43383e-99	1	1140	0.277845	0.253269	0	1	2.09606e-98	1	3.17127e-74	Monotone	TRUE	TRUE	FALSE	TRUE	TRUE	TRUE	FALSE	TRUE
wu540pars	1140	0.202943	0.111397	0	1	4.99311e-26	1	1140	0.202943	0.111397	0	1	7.3785e-26	1	4.59305e-31	Monotone	TRUE	TRUE	FALSE	TRUE	TRUE	TRUE	FALSE	TRUE
wu540pars40	1140	0.288667	0.287437	0	1	1.32706e-113	1	1140	0.288667	0.287437	0	1	1.12685e-113	1	0	Monotone	TRUE	TRUE	FALSE	TRUE	TRUE	TRUE	FALSE	TRUE
wu5pars40	1140	0.285172	0.281129	0	1	8.73587e-109	1	1140	0.285172	0.281129	0	1	4.05835e-108	1	0	Monotone	TRUE	TRUE	FALSE	TRUE	TRUE	TRUE	FALSE	TRUE
wu5parsOrf	1140	0.419469	0.494391	0	1	0	1	1140	0.419469	0.494391	0	1	0	1	0	Monotone	TRUE	TRUE	FALSE	TRUE	TRUE	TRUE	FALSE	TRUE
r5utrOrf	1343	0.124833	0.00207502	0.222	0.292	0.252461	0.325066	1343	0.124833	0.00207502	0.26	0.336	0.281341	0.35527	0.0951828	MIC not significant	FALSE	FALSE	FALSE	FALSE	FALSE	FALSE	FALSE	FALSE
r3utrOrf	1343	0.134655	0.0197147	0.036	0.813	0.0216366	0.806724	1342	0.134696	0.0198631	0.031	0.806	0.0205436	0.812842	2.17113e-07	non-significant monotone/non-monotone	FALSE	FALSE	FALSE	FALSE	FALSE	FALSE	FALSE	FALSE
r5utr3utr	1342	0.122076	0.00713712	0.332	0.722	0.35331	0.728863	1342	0.122076	0.00713712	0.355	0.736	0.36885	0.752195	0.00194406	MIC not significant	FALSE	FALSE	FALSE	FALSE	FALSE	FALSE	FALSE	FALSE
allLens	1343	0.134919	0.0144475	0.02	0.385	0.00911323	0.408217	1343	0.134919	0.0144475	0.021	0.347	0.00845688	0.378537	1.00173e-05	non-significant monotone/non-monotone	FALSE	FALSE	FALSE	FALSE	FALSE	FALSE	FALSE	FALSE
all_PARS_numBP_all	1140	0.137437	0.00286515	0.12	0.165	0.111584	0.171647	1140	0.137437	0.00286515	0.108	0.159	0.102359	0.163457	0.0708255	MIC not significant	FALSE	FALSE	FALSE	FALSE	FALSE	FALSE	FALSE	FALSE
allgc	1343	0.13885	0.0219879	0.005	0.692	0.0016803	0.706522	1343	0.13885	0.0219879	0.007	0.69	0.00146091	0.69497	4.78096e-08	non-significant monotone/non-monotone	TRUE	FALSE	FALSE	FALSE	TRUE	TRUE	FALSE	FALSE
utr540orf40gc	1343	0.130004	0.00653978	0.05	0.174	0.0443451	0.180535	1343	0.130004	0.00653978	0.045	0.148	0.0340529	0.157066	0.00301995	MIC not significant	FALSE	FALSE	FALSE	FALSE	FALSE	FALSE	FALSE	FALSE
utr5orf40gc	1343	0.139263	0.00676791	0.004	0.019	0.00124529	0.013868	1343	0.139263	0.00676791	0.001	0.016	0.00077626	0.0117244	0.00255159	Non-monotone	TRUE	TRUE	FALSE	FALSE	TRUE	TRUE	FALSE	FALSE
utr5orfgc	1343	0.16243	0.0582285	0	0.998485	2.13115e-11	0.994812	1343	0.16243	0.0582285	0	0.998257	1.67753e-11	0.994994	3.02685e-19	Monotone	TRUE	TRUE	FALSE	TRUE	TRUE	TRUE	FALSE	TRUE
orf40utr340gc	1343	0.118197	0.000356322	0.404	0.39	0.432456	0.412527	1343	0.118197	0.000356322	0.421	0.399	0.439517	0.418548	0.48945	MIC not significant	FALSE	FALSE	FALSE	FALSE	FALSE	FALSE	FALSE	FALSE
orf40utr3gc	1343	0.129965	0.0112171	0.051	0.404	0.040731	0.423846	1343	0.129965	0.0112171	0.037	0.386	0.0285297	0.403929	0.00010081	MIC not significant	FALSE	FALSE	FALSE	FALSE	FALSE	FALSE	FALSE	FALSE
orfutr3gc	1343	0.142132	0.0309955	0.002	0.929	0.000389949	0.930117	1343	0.142132	0.0309955	0.002	0.94	0.000440172	0.933759	8.21033e-11	non-significant monotone/non-monotone	TRUE	TRUE	FALSE	FALSE	TRUE	TRUE	FALSE	FALSE
allmeanFE	1343	0.159252	0.0789493	0	1	7.35528e-10	1	1343	0.159252	0.0789493	0	1	5.64807e-10	1	4.7095e-26	Monotone	TRUE	TRUE	FALSE	TRUE	TRUE	TRUE	FALSE	TRUE
utr540orf40FE	1343	0.113297	0.00776855	0.721	0.942	0.724845	0.941256	1343	0.113297	0.00776855	0.707	0.936	0.703423	0.934362	0.00122357	MIC not significant	FALSE	FALSE	FALSE	FALSE	FALSE	FALSE	FALSE	FALSE
utr5orf40FE	1343	0.136763	0.0172825	0.009	0.499	0.00609412	0.514709	1343	0.136763	0.0172825	0.01	0.491	0.00352673	0.514531	1.33665e-06	non-significant monotone/non-monotone	FALSE	FALSE	FALSE	FALSE	TRUE	TRUE	FALSE	FALSE
utr5orfFE	1343	0.196737	0.114453	0	1	1.04674e-33	1	1343	0.196737	0.114453	0	1	1.1597e-33	1	0	Monotone	TRUE	TRUE	FALSE	TRUE	TRUE	TRUE	FALSE	TRUE
utr530Corf30CbestATG	1343	0.136508	0.0203796	0.009	0.6	0.00377677	0.606696	993	0.138333	0.00904189	0.269	0.643	0.276133	0.666747	0.00270463	MIC not significant	FALSE	FALSE	FALSE	FALSE	TRUE	FALSE	FALSE	FALSE
utr530Corf30CmeanATG	1343	0.132151	0.0182701	0.027	0.726	0.0200286	0.739553	993	0.139488	0.00660853	0.202	0.469	0.21307	0.480993	0.0103859	MIC not significant	FALSE	FALSE	FALSE	FALSE	FALSE	FALSE	FALSE	FALSE
utr530Corf30CbestATG0	1343	0.124898	0.005144	0.076	0.184	0.06988	0.199359	331	0.198809	0.00364353	0.206	0.212	0.218315	0.23166	0.273504	MIC not significant	FALSE	FALSE	FALSE	FALSE	FALSE	FALSE	FALSE	FALSE
utr530Corf30CmeanATG0	1343	0.124898	0.00515225	0.082	0.209	0.0695227	0.200763	331	0.220289	0.00365502	0.031	0.033	0.0265847	0.0273784	0.272748	MIC not significant	FALSE	FALSE	FALSE	FALSE	FALSE	FALSE	FALSE	FALSE
utr530Corf30CbestATG1	1343	0.124466	0.0138385	0.164	0.822	0.162198	0.816151	769	0.140816	0.0149427	0.538	0.966	0.572475	0.956429	0.000681135	MIC not significant	FALSE	FALSE	FALSE	FALSE	FALSE	FALSE	FALSE	FALSE
utr530Corf30CmeanATG1	1343	0.123706	0.0127879	0.159	0.812	0.176399	0.811208	769	0.137749	0.0119167	0.684	0.961	0.695619	0.951894	0.00243474	MIC not significant	FALSE	FALSE	FALSE	FALSE	FALSE	FALSE	FALSE	FALSE
utr530Corf30CbestATG2	1343	0.102923	0.00360847	0.906	0.964	0.907144	0.958871	223	0.218296	6.25301e-05	0.232	0.18	0.244467	0.176005	0.906524	MIC not significant	FALSE	FALSE	FALSE	FALSE	FALSE	FALSE	FALSE	FALSE
utr530Corf30CmeanATG2	1343	0.102923	0.003594	0.918	0.974	0.90941	0.960666	223	0.228626	0.000132032	0.108	0.084	0.102064	0.0683102	0.864514	MIC not significant	FALSE	FALSE	FALSE	FALSE	FALSE	FALSE	FALSE	FALSE
utr330Corf30CbestATG	1343	0.119092	0.0102264	0.462	0.944	0.499139	0.932075	1120	0.126393	0.00512758	0.565	0.79	0.583658	0.786857	0.0165374	MIC not significant	FALSE	FALSE	FALSE	FALSE	FALSE	FALSE	FALSE	FALSE
utr330Corf30CmeanATG	1343	0.134167	0.00949566	0.014	0.149	0.00748735	0.152256	1120	0.143274	0.00440367	0.022	0.051	0.0155135	0.0463808	0.0263642	non-significant monotone/non-monotone	FALSE	FALSE	FALSE	FALSE	TRUE	FALSE	FALSE	FALSE
utr330Corf30CbestATG0	1343	0.113952	0.000108151	0.617	0.593	0.649174	0.618339	517	0.197132	0.0064481	0.008	0.017	0.00302049	0.00923619	0.0680976	MIC not significant	FALSE	FALSE	FALSE	FALSE	FALSE	TRUE	FALSE	FALSE
utr330Corf30CmeanATG0	1343	0.113952	0.00012228	0.631	0.603	0.64437	0.610678	517	0.18703	0.00707181	0.03	0.064	0.0250606	0.0653739	0.0560229	MIC not significant	FALSE	FALSE	FALSE	FALSE	FALSE	FALSE	FALSE	FALSE
utr330Corf30CbestATG1	1343	0.114867	0.00666669	0.673	0.909	0.673093	0.908249	851	0.141025	0.00970413	0.389	0.78	0.406599	0.782499	0.0040213	MIC not significant	FALSE	FALSE	FALSE	FALSE	FALSE	FALSE	FALSE	FALSE
utr330Corf30CmeanATG1	1343	0.117116	0.00682724	0.525	0.86	0.548404	0.851101	851	0.152946	0.0101985	0.063	0.269	0.0535323	0.288041	0.00318589	MIC not significant	FALSE	FALSE	FALSE	FALSE	FALSE	FALSE	FALSE	FALSE
utr330Corf30CbestATG2	1343	0.129127	0.011082	0.024	0.273	0.0190877	0.265938	308	0.209636	0.00566146	0.093	0.127	0.091415	0.12154	0.187838	MIC not significant	FALSE	FALSE	FALSE	FALSE	FALSE	FALSE	FALSE	FALSE
utr330Corf30CmeanATG2	1343	0.129127	0.011014	0.032	0.233	0.0174148	0.251452	308	0.211218	0.00495379	0.082	0.095	0.0819966	0.096333	0.218052	MIC not significant	FALSE	FALSE	FALSE	FALSE	FALSE	FALSE	FALSE	FALSE
rutr530Corf30CbestATG	1339	0.148609	0.0555137	0.000184211	1	8.63751e-06	0.999994	1338	0.147438	0.0547266	0.000376238	1	2.12257e-05	0.999996	4.33305e-18	Monotone	TRUE	TRUE	FALSE	TRUE	TRUE	TRUE	FALSE	TRUE
rutr530Corf30CmeanATG	1339	0.161239	0.0539618	0	0.991455	1.17043e-10	0.984226	1338	0.161278	0.0531825	0	0.987228	1.29337e-10	0.978059	1.30722e-17	Monotone	TRUE	TRUE	FALSE	TRUE	TRUE	TRUE	FALSE	TRUE
rutr530Corf30CbestATG0	1339	0.155087	0.0545735	0	0.999901	3.01428e-08	0.999209	1338	0.154254	0.053826	1.31579e-05	0.999855	6.57267e-08	0.999276	8.25237e-18	Monotone	TRUE	TRUE	FALSE	TRUE	TRUE	TRUE	FALSE	TRUE
rutr530Corf30CmeanATG0	1339	0.155087	0.0546729	0	0.99998	2.87914e-08	0.99926	1338	0.154254	0.0539248	9.90099e-06	0.999881	6.81794e-08	0.9993	7.68924e-18	Monotone	TRUE	TRUE	FALSE	TRUE	TRUE	TRUE	FALSE	TRUE
rutr530Corf30CbestATG1	1339	0.141812	0.0435325	0.002	1	0.000507826	0.999866	1337	0.140506	0.0428005	0.00384211	0.999987	0.001242	0.999881	2.1655e-14	Monotone	TRUE	TRUE	FALSE	TRUE	TRUE	TRUE	FALSE	TRUE
rutr530Corf30CmeanATG1	1339	0.148033	0.0426864	0.00025	0.997158	1.02895e-05	0.992708	1337	0.147283	0.0419593	0.001	0.996	2.82472e-05	0.992887	3.92992e-14	Monotone	TRUE	TRUE	FALSE	TRUE	TRUE	TRUE	FALSE	TRUE
rutr530Corf30CbestATG2	1339	0.158153	0.057954	0	0.999861	1.68483e-09	0.999253	1338	0.15768	0.0571954	0	0.999931	2.60999e-09	0.999199	7.39192e-19	Monotone	TRUE	TRUE	FALSE	TRUE	TRUE	TRUE	FALSE	TRUE
rutr530Corf30CmeanATG2	1339	0.158153	0.0579192	1.31579e-05	0.999868	1.78521e-09	0.999224	1338	0.15768	0.0571608	1.31579e-05	0.999882	2.42611e-09	0.999175	7.57801e-19	Monotone	TRUE	TRUE	FALSE	TRUE	TRUE	TRUE	FALSE	TRUE
rutr330Corf30CbestATG	1339	0.153921	0.0479708	2.63158e-05	0.996171	1.40796e-07	0.990937	1338	0.154047	0.0479706	0.001	0.997	4.62571e-07	0.988914	5.37897e-16	Monotone	TRUE	TRUE	FALSE	TRUE	TRUE	TRUE	FALSE	TRUE
rutr330Corf30CmeanATG	1339	0.157887	0.0478048	0	0.96797	3.24305e-09	0.956927	1338	0.158058	0.047805	1.31579e-05	0.966276	3.08889e-09	0.954715	6.05183e-16	Monotone	TRUE	TRUE	FALSE	TRUE	TRUE	TRUE	FALSE	FALSE
rutr330Corf30CbestATG0	1339	0.139209	0.0177808	0.006	0.431	0.00260194	0.458809	1337	0.137201	0.0173419	0.013	0.54	0.00528194	0.564641	1.35339e-06	non-significant monotone/non-monotone	TRUE	FALSE	FALSE	FALSE	TRUE	TRUE	FALSE	FALSE
rutr330Corf30CmeanATG0	1339	0.131492	0.0177184	0.067	0.883	0.0515512	0.864574	1337	0.12945	0.01728	0.112	0.915	0.1076	0.907554	1.41385e-06	MIC not significant	FALSE	FALSE	FALSE	FALSE	FALSE	FALSE	FALSE	FALSE
rutr330Corf30CbestATG1	1339	0.160268	0.0326517	0	0.134149	3.11302e-10	0.133504	1338	0.159641	0.0320408	0	0.137792	6.33072e-10	0.137552	4.2589e-11	non-significant monotone/non-monotone	TRUE	TRUE	FALSE	FALSE	TRUE	TRUE	FALSE	FALSE
rutr330Corf30CmeanATG1	1339	0.147965	0.0330548	0.001	0.807	2.80823e-05	0.806463	1338	0.147328	0.0324409	0.000263158	0.823895	1.76349e-05	0.823143	3.21215e-11	non-significant monotone/non-monotone	TRUE	TRUE	FALSE	FALSE	TRUE	TRUE	FALSE	FALSE
rutr330Corf30CbestATG2	1339	0.15758	0.0613819	0	1	3.76207e-09	0.999934	1338	0.157096	0.0606018	9.90099e-06	1	5.26778e-09	0.999926	6.40357e-20	Monotone	TRUE	TRUE	FALSE	TRUE	TRUE	TRUE	FALSE	TRUE
rutr330Corf30CmeanATG2	1339	0.15758	0.0613241	0	0.99999	3.2362e-09	0.999935	1338	0.157096	0.0605443	1.9802e-05	1	5.28621e-09	0.999925	6.6739e-20	Monotone	TRUE	TRUE	FALSE	TRUE	TRUE	TRUE	FALSE	TRUE
utr530Corf30CnumATGs	1343	0.136122	0.0265537	0.004	0.802	0.00267643	0.810716	993	0.156266	0.0178206	0.001	0.114	0.000998261	0.114731	2.44039e-05	non-significant monotone/non-monotone	TRUE	TRUE	FALSE	FALSE	TRUE	TRUE	FALSE	FALSE
utr530Corf30CnumATGs0	1343	0.124898	0.00522453	0.087	0.198	0.0785032	0.2081	331	0.1922	0.00467673	0.14	0.155	0.145372	0.160906	0.214631	MIC not significant	FALSE	FALSE	FALSE	FALSE	FALSE	FALSE	FALSE	FALSE
utr530Corf30CnumATGs1	1343	0.113638	0.0143417	0.646	0.993	0.66507	0.989307	769	0.149131	0.0190148	0.122	0.674	0.112726	0.688622	0.000125032	MIC not significant	FALSE	FALSE	FALSE	FALSE	FALSE	FALSE	FALSE	FALSE
utr530Corf30CnumATGs2	1343	0.102923	0.00384785	0.912	0.966	0.900646	0.958366	223	0.239441	0.00444195	0.004	0.004	0.00194954	0.0016886	0.321796	MIC not significant	FALSE	TRUE	FALSE	FALSE	FALSE	TRUE	FALSE	FALSE
utr330Corf30CnumATGs	1343	0.1135	0.00660887	0.696	0.925	0.697977	0.907892	1120	0.110306	0.00167386	0.941	0.95	0.934588	0.94659	0.171234	MIC not significant	FALSE	FALSE	FALSE	FALSE	FALSE	FALSE	FALSE	FALSE
utr330Corf30CnumATGs0	1343	0.113952	7.62094e-05	0.66	0.621	0.677159	0.644199	517	0.165886	0.00172432	0.167	0.161	0.159837	0.151421	0.34604	MIC not significant	FALSE	FALSE	FALSE	FALSE	FALSE	FALSE	FALSE	FALSE
utr330Corf30CnumATGs1	1343	0.117361	0.00280118	0.432	0.551	0.450016	0.55743	851	0.125535	0.000684902	0.795	0.783	0.812939	0.799316	0.445788	MIC not significant	FALSE	FALSE	FALSE	FALSE	FALSE	FALSE	FALSE	FALSE
utr330Corf30CnumATGs2	1343	0.129127	0.0104143	0.019	0.224	0.0166225	0.227969	308	0.173988	0.000252588	0.258	0.209	0.27544	0.220472	0.781162	MIC not significant	FALSE	FALSE	FALSE	FALSE	FALSE	FALSE	FALSE	FALSE
utr5uORFsBio	1343	0.102378	0.00223685	0.806	0.852	0.797999	0.857742	117	0.272672	0.0760671	0.071	0.644	0.0608154	0.660445	0.0026139	MIC not significant	FALSE	FALSE	FALSE	FALSE	FALSE	FALSE	FALSE	FALSE
u5maxLenuORFsBio	1343	0.102378	0.00249583	0.801	0.867	0.789305	0.859178	117	0.152651	0.0113312	0.997	0.999	0.985019	0.987837	0.253331	MIC not significant	FALSE	FALSE	FALSE	FALSE	FALSE	FALSE	FALSE	FALSE
u5meanLenuORFsBio	1343	0.102378	0.00267016	0.775	0.857	0.778128	0.853598	117	0.173067	1.52915e-06	0.968	0.934	0.950505	0.918405	0.989443	MIC not significant	FALSE	FALSE	FALSE	FALSE	FALSE	FALSE	FALSE	FALSE
u5maxCostuORFsBio	1343	0.102378	0.00247488	0.781	0.869	0.79415	0.860223	117	0.220309	0.0144734	0.664	0.736	0.693111	0.756407	0.196347	MIC not significant	FALSE	FALSE	FALSE	FALSE	FALSE	FALSE	FALSE	FALSE
u5meanCostuORFsBio	1343	0.102378	0.00263271	0.779	0.856	0.787619	0.859777	117	0.184523	0.000622037	0.965	0.938	0.947551	0.917558	0.789531	MIC not significant	FALSE	FALSE	FALSE	FALSE	FALSE	FALSE	FALSE	FALSE
utr5uORFs30CBio	1343	0.108747	0.00441983	0.304	0.509	0.315729	0.545521	75	0.187489	0.00114276	0.834	0.738	0.82921	0.759795	0.773406	MIC not significant	FALSE	FALSE	FALSE	FALSE	FALSE	FALSE	FALSE	FALSE
u5maxLenuORFs30CBio	1343	0.108747	0.00448135	0.282	0.491	0.290991	0.516932	75	0.205772	0.0017706	0.785	0.692	0.78715	0.710285	0.720008	MIC not significant	FALSE	FALSE	FALSE	FALSE	FALSE	FALSE	FALSE	FALSE
u5meanLenuORFs30CBio	1343	0.108747	0.00450415	0.298	0.481	0.296691	0.519332	75	0.219923	0.00371622	0.685	0.599	0.720823	0.639257	0.603376	MIC not significant	FALSE	FALSE	FALSE	FALSE	FALSE	FALSE	FALSE	FALSE
u5maxCostuORFs30CBio	1343	0.108747	0.004472	0.283	0.496	0.304144	0.529143	75	0.221774	0.000951978	0.785	0.677	0.796866	0.70358	0.792721	MIC not significant	FALSE	FALSE	FALSE	FALSE	FALSE	FALSE	FALSE	FALSE
u5meanCostuORFs30CBio	1343	0.108747	0.00447259	0.279	0.502	0.297167	0.523706	75	0.238569	0.000840446	0.641	0.523	0.662566	0.546007	0.804986	MIC not significant	FALSE	FALSE	FALSE	FALSE	FALSE	FALSE	FALSE	FALSE
utr5uORFs0Bio	1343	0.10328	0.000105965	0.584	0.54	0.609467	0.567903	68	0.327707	0.102	0.066	0.525	0.0506756	0.571347	0.00793739	MIC not significant	FALSE	FALSE	FALSE	FALSE	FALSE	FALSE	FALSE	FALSE
utr5uORFs1Bio	1343	0.101651	8.98101e-05	0.714	0.668	0.723921	0.686417	60	0.216121	0.0372798	0.57	0.747	0.609735	0.761848	0.139388	MIC not significant	FALSE	FALSE	FALSE	FALSE	FALSE	FALSE	FALSE	FALSE
utr5uORFs2Bio	1343	0.10013	1.60034e-07	0.78	0.743	0.794968	0.759161	58	0.495804	0.17884	0.001	0.039	1.7821e-07	0.0253451	0.000942312	MIC not significant	FALSE	TRUE	FALSE	FALSE	FALSE	TRUE	FALSE	FALSE
u5maxLenuORFs0Bio	1343	0.10328	0.000151052	0.602	0.569	0.622608	0.586718	68	0.243191	0.00101078	0.631	0.533	0.670844	0.562346	0.79689	MIC not significant	FALSE	FALSE	FALSE	FALSE	FALSE	FALSE	FALSE	FALSE
u5maxLenuORFs1Bio	1343	0.101651	0.000118421	0.716	0.68	0.725175	0.687755	60	0.235284	0.00116832	0.51	0.376	0.560841	0.422684	0.795428	MIC not significant	FALSE	FALSE	FALSE	FALSE	FALSE	FALSE	FALSE	FALSE
u5maxLenuORFs2Bio	1343	0.10013	1.56083e-06	0.79	0.747	0.79105	0.753152	58	0.269894	0.00928554	0.276	0.217	0.310938	0.250524	0.47179	MIC not significant	FALSE	FALSE	FALSE	FALSE	FALSE	FALSE	FALSE	FALSE
u5meanLenuORFs0Bio	1343	0.10328	0.000155819	0.606	0.57	0.626129	0.58948	68	0.288843	0.00358187	0.262	0.204	0.290306	0.217965	0.627811	MIC not significant	FALSE	FALSE	FALSE	FALSE	FALSE	FALSE	FALSE	FALSE
u5meanLenuORFs1Bio	1343	0.101651	0.000120259	0.723	0.675	0.733283	0.696006	60	0.290725	0.00223917	0.166	0.111	0.17757	0.107133	0.719574	MIC not significant	FALSE	FALSE	FALSE	FALSE	FALSE	FALSE	FALSE	FALSE
u5meanLenuORFs2Bio	1343	0.10013	5.15168e-06	0.784	0.752	0.798829	0.763978	58	0.245331	0.00611179	0.53	0.434	0.573852	0.482551	0.559679	MIC not significant	FALSE	FALSE	FALSE	FALSE	FALSE	FALSE	FALSE	FALSE
u5maxCostuORFs0Bio	1343	0.10328	0.000154361	0.574	0.533	0.604685	0.563738	68	0.24303	0.00252569	0.747	0.646	0.757885	0.671149	0.68401	MIC not significant	FALSE	FALSE	FALSE	FALSE	FALSE	FALSE	FALSE	FALSE
u5maxCostuORFs1Bio	1343	0.101651	0.000117752	0.666	0.62	0.694191	0.656462	60	0.21897	0.00111377	0.732	0.587	0.751507	0.620115	0.80016	MIC not significant	FALSE	FALSE	FALSE	FALSE	FALSE	FALSE	FALSE	FALSE
u5maxCostuORFs2Bio	1343	0.10013	1.76239e-06	0.789	0.751	0.79829	0.766834	58	0.208618	0.0065002	0.878	0.814	0.864795	0.81767	0.546441	MIC not significant	FALSE	FALSE	FALSE	FALSE	FALSE	FALSE	FALSE	FALSE
u5meanCostuORFs0Bio	1343	0.10328	0.000162217	0.602	0.57	0.612033	0.577704	68	0.236773	0.00906787	0.811	0.779	0.816631	0.779533	0.439849	MIC not significant	FALSE	FALSE	FALSE	FALSE	FALSE	FALSE	FALSE	FALSE
u5meanCostuORFs1Bio	1343	0.101651	0.000121343	0.701	0.679	0.721461	0.691023	60	0.333115	0.00354602	0.065	0.04	0.0517699	0.0256682	0.651299	MIC not significant	FALSE	FALSE	FALSE	FALSE	FALSE	FALSE	FALSE	FALSE
u5meanCostuORFs2Bio	1343	0.10013	5.34283e-06	0.793	0.752	0.784781	0.749805	58	0.236356	0.00755725	0.657	0.584	0.70582	0.63436	0.516419	MIC not significant	FALSE	FALSE	FALSE	FALSE	FALSE	FALSE	FALSE	FALSE
orfuORFsBio	1343	0.129339	0.0237098	0.054	0.935	0.0417006	0.925432	1255	0.137206	0.0325377	0.024	0.985	0.019051	0.979095	1.22091e-10	MIC not significant	FALSE	FALSE	FALSE	FALSE	FALSE	FALSE	FALSE	FALSE
orfmaxLenuORFsBio	1343	0.117744	0.00838503	0.473	0.867	0.484538	0.863427	1255	0.123224	0.011907	0.394	0.921	0.408909	0.916869	0.00010734	MIC not significant	FALSE	FALSE	FALSE	FALSE	FALSE	FALSE	FALSE	FALSE
orfmeanLenuORFsBio	1343	0.122772	0.00211464	0.278	0.364	0.308298	0.389903	1255	0.129728	0.00325165	0.2	0.313	0.194917	0.323566	0.0434109	MIC not significant	FALSE	FALSE	FALSE	FALSE	FALSE	FALSE	FALSE	FALSE
orfmaxCostuORFsBio	1343	0.124402	0.00842274	0.246	0.709	0.264214	0.716266	1255	0.131555	0.0119591	0.163	0.767	0.162324	0.769357	0.000103646	MIC not significant	FALSE	FALSE	FALSE	FALSE	FALSE	FALSE	FALSE	FALSE
orfmeanCostuORFsBio	1343	0.113256	0.00213055	0.877	0.932	0.886062	0.924713	1255	0.120683	0.00327475	0.767	0.885	0.767098	0.867912	0.0426829	MIC not significant	FALSE	FALSE	FALSE	FALSE	FALSE	FALSE	FALSE	FALSE
orfuORFs30CBio	1343	0.133856	0.0215507	0.012	0.672	0.00833871	0.690236	970	0.155144	0.0127293	0.004	0.058	0.00224505	0.0523585	0.000430567	non-significant monotone/non-monotone	FALSE	TRUE	FALSE	FALSE	FALSE	TRUE	FALSE	FALSE
orfmaxLenuORFs30CBio	1343	0.12404	0.0119363	0.16	0.741	0.169197	0.731067	970	0.116103	0.00158274	0.908	0.928	0.911802	0.922438	0.215735	MIC not significant	FALSE	FALSE	FALSE	FALSE	FALSE	FALSE	FALSE	FALSE
orfmeanLenuORFs30CBio	1343	0.116164	0.00888645	0.546	0.923	0.573976	0.907632	970	0.110457	0.000121161	0.982	0.978	0.978117	0.971951	0.732058	MIC not significant	FALSE	FALSE	FALSE	FALSE	FALSE	FALSE	FALSE	FALSE
orfmaxCostuORFs30CBio	1343	0.117944	0.0115997	0.493	0.958	0.516526	0.955053	970	0.127525	0.00135447	0.694	0.711	0.708778	0.720376	0.252153	MIC not significant	FALSE	FALSE	FALSE	FALSE	FALSE	FALSE	FALSE	FALSE
orfmeanCostuORFs30CBio	1343	0.115582	0.00855574	0.62	0.953	0.644123	0.940174	970	0.1232	5.82144e-05	0.862	0.829	0.855039	0.825567	0.812403	MIC not significant	FALSE	FALSE	FALSE	FALSE	FALSE	FALSE	FALSE	FALSE
orfuORFs200CBio	1343	0.154503	0.0418307	0	0.694396	1.19268e-07	0.702922	1328	0.155548	0.0404973	2.63158e-05	0.621737	1.68553e-07	0.635628	1.33679e-13	non-significant monotone/non-monotone	TRUE	TRUE	FALSE	FALSE	TRUE	TRUE	FALSE	FALSE
orfmaxLenuORFs200CBio	1343	0.115605	0.00974503	0.571	0.964	0.599053	0.940857	1328	0.115715	0.00865416	0.645	0.947	0.665807	0.942728	0.000688137	MIC not significant	FALSE	FALSE	FALSE	FALSE	FALSE	FALSE	FALSE	FALSE
orfmeanLenuORFs200CBio	1343	0.119884	0.00158594	0.503	0.545	0.522558	0.578131	1328	0.118671	0.00107342	0.631	0.649	0.648291	0.667743	0.232815	MIC not significant	FALSE	FALSE	FALSE	FALSE	FALSE	FALSE	FALSE	FALSE
orfmaxCostuORFs200CBio	1343	0.121533	0.00970443	0.435	0.898	0.462885	0.901047	1328	0.122173	0.00861381	0.46	0.923	0.508279	0.902021	0.000708404	MIC not significant	FALSE	FALSE	FALSE	FALSE	FALSE	FALSE	FALSE	FALSE
orfmeanCostuORFs200CBio	1343	0.118253	0.00160188	0.648	0.7	0.666335	0.712928	1328	0.118245	0.00108644	0.728	0.742	0.737906	0.75333	0.230001	MIC not significant	FALSE	FALSE	FALSE	FALSE	FALSE	FALSE	FALSE	FALSE
orfuORFs0Bio	1343	0.11841	0.0237569	0.426	1	0.44246	0.998838	1275	0.114402	0.0134011	0.737	0.996	0.739222	0.990381	3.42114e-05	MIC not significant	FALSE	FALSE	FALSE	FALSE	FALSE	FALSE	FALSE	FALSE
orfuORFs1Bio	1343	0.134854	0.0344828	0.005	0.995	0.00685324	0.985616	1273	0.142821	0.035055	0.002	0.936	0.000925642	0.929545	1.65905e-11	non-significant monotone/non-monotone	TRUE	TRUE	FALSE	FALSE	TRUE	TRUE	FALSE	FALSE
orfuORFs2Bio	1343	0.113298	0.0110928	0.671	0.988	0.693926	0.975138	1082	0.122413	0.00395269	0.707	0.81	0.709326	0.817584	0.0386682	MIC not significant	FALSE	FALSE	FALSE	FALSE	FALSE	FALSE	FALSE	FALSE
orfmaxLenuORFs0Bio	1343	0.122476	0.0143195	0.235	0.927	0.241709	0.904496	1275	0.120832	0.00597399	0.445	0.714	0.46891	0.725947	0.00575743	MIC not significant	FALSE	FALSE	FALSE	FALSE	FALSE	FALSE	FALSE	FALSE
orfmaxLenuORFs1Bio	1343	0.133276	2.18754e-06	0.013	0.01	0.0131681	0.0100974	1273	0.133074	0.000435415	0.043	0.042	0.0411257	0.0369301	0.456966	Non-monotone	FALSE	FALSE	FALSE	FALSE	FALSE	FALSE	FALSE	FALSE
orfmaxLenuORFs2Bio	1343	0.119845	0.0118875	0.321	0.881	0.338024	0.872847	1082	0.150225	0.00471343	0.005	0.018	0.00187116	0.00752945	0.0239233	MIC not significant	FALSE	FALSE	FALSE	FALSE	FALSE	TRUE	FALSE	FALSE
orfmeanLenuORFs0Bio	1343	0.128232	0.0130398	0.094	0.699	0.0903288	0.708259	1275	0.121625	0.00508607	0.528	0.776	0.541083	0.780182	0.0108572	MIC not significant	FALSE	FALSE	FALSE	FALSE	FALSE	FALSE	FALSE	FALSE
orfmeanLenuORFs1Bio	1343	0.143632	0.0159784	0.002	0.071	6.1587e-05	0.0618831	1273	0.140415	0.0256531	0.007	0.779	0.002105	0.782242	9.13242e-09	non-significant monotone/non-monotone	TRUE	FALSE	FALSE	FALSE	TRUE	TRUE	FALSE	FALSE
orfmeanLenuORFs2Bio	1343	0.124491	0.00695273	0.157	0.428	0.164555	0.447601	1082	0.144896	0.000828948	0.022	0.025	0.0189084	0.0174386	0.344067	MIC not significant	FALSE	FALSE	FALSE	FALSE	FALSE	FALSE	FALSE	FALSE
orfmaxCostuORFs0Bio	1343	0.128041	0.0143834	0.121	0.843	0.109968	0.838359	1275	0.12367	0.00600951	0.463	0.795	0.492543	0.795608	0.00561411	MIC not significant	FALSE	FALSE	FALSE	FALSE	FALSE	FALSE	FALSE	FALSE
orfmaxCostuORFs1Bio	1343	0.126052	1.23684e-07	0.134	0.112	0.134425	0.111373	1273	0.126635	0.000358325	0.238	0.23	0.266581	0.249924	0.499813	MIC not significant	FALSE	FALSE	FALSE	FALSE	FALSE	FALSE	FALSE	FALSE
orfmaxCostuORFs2Bio	1343	0.124546	0.00971256	0.167	0.597	0.167038	0.627296	1082	0.143471	0.00274186	0.033	0.049	0.0224853	0.0400059	0.0851421	MIC not significant	FALSE	FALSE	FALSE	FALSE	FALSE	FALSE	FALSE	FALSE
orfmeanCostuORFs0Bio	1343	0.137127	0.0132588	0.01	0.244	0.00374469	0.250474	1275	0.133919	0.00523014	0.064	0.177	0.0536416	0.179206	0.00978945	MIC not significant	FALSE	FALSE	FALSE	FALSE	TRUE	FALSE	FALSE	FALSE
orfmeanCostuORFs1Bio	1343	0.139958	0.0156809	0.002	0.219	0.000851877	0.236748	1273	0.146244	0.0252479	0.001	0.604	0.000270735	0.620747	1.19849e-08	non-significant monotone/non-monotone	TRUE	TRUE	FALSE	FALSE	TRUE	TRUE	FALSE	FALSE
orfmeanCostuORFs2Bio	1343	0.126431	0.00540467	0.146	0.311	0.137396	0.343335	1082	0.145554	0.000182519	0.027	0.023	0.0168904	0.0135861	0.657115	MIC not significant	FALSE	FALSE	FALSE	FALSE	FALSE	FALSE	FALSE	FALSE
orfuORFs030CBio	1343	0.127848	0.00280676	0.031	0.052	0.0296813	0.0524559	314	0.17935	0.000963827	0.287	0.232	0.297163	0.253002	0.583646	MIC not significant	FALSE	FALSE	FALSE	FALSE	FALSE	FALSE	FALSE	FALSE
orfuORFs130CBio	1343	0.109626	0.0125152	0.845	0.999	0.847816	0.996122	755	0.151845	0.0139916	0.096	0.41	0.0866559	0.43738	0.001129	MIC not significant	FALSE	FALSE	FALSE	FALSE	FALSE	FALSE	FALSE	FALSE
orfuORFs230CBio	1343	0.101952	0.00292159	0.91	0.953	0.908114	0.950325	199	0.285177	0.0204147	7.89474e-05	0.000328947	4.91537e-07	8.1051e-06	0.0440922	MIC not significant	FALSE	TRUE	FALSE	FALSE	FALSE	TRUE	FALSE	FALSE
orfmaxLenuORFs030CBio	1343	0.127848	0.00349327	0.032	0.075	0.0296307	0.0688607	314	0.191986	0.00527549	0.266	0.317	0.29429	0.339652	0.199276	MIC not significant	FALSE	FALSE	FALSE	FALSE	FALSE	FALSE	FALSE	FALSE
orfmaxLenuORFs130CBio	1343	0.112059	0.00648279	0.778	0.948	0.775669	0.941887	755	0.12771	0.00029805	0.855	0.83	0.854914	0.830693	0.635771	MIC not significant	FALSE	FALSE	FALSE	FALSE	FALSE	FALSE	FALSE	FALSE
orfmaxLenuORFs230CBio	1343	0.101952	0.00270353	0.918	0.956	0.918396	0.955845	199	0.202354	0.000255502	0.3	0.238	0.330394	0.263902	0.822694	MIC not significant	FALSE	FALSE	FALSE	FALSE	FALSE	FALSE	FALSE	FALSE
orfmeanLenuORFs030CBio	1343	0.127848	0.0034921	0.036	0.076	0.031433	0.0708315	314	0.191986	0.00524392	0.287	0.318	0.292543	0.330611	0.20063	MIC not significant	FALSE	FALSE	FALSE	FALSE	FALSE	FALSE	FALSE	FALSE
orfmeanLenuORFs130CBio	1343	0.111798	0.00453926	0.753	0.907	0.76917	0.897461	755	0.137626	0.00049668	0.526	0.492	0.561128	0.529431	0.540916	MIC not significant	FALSE	FALSE	FALSE	FALSE	FALSE	FALSE	FALSE	FALSE
orfmeanLenuORFs230CBio	1343	0.101952	0.00265811	0.908	0.95	0.907608	0.946227	199	0.202354	8.5297e-06	0.313	0.25	0.34296	0.271468	0.967344	MIC not significant	FALSE	FALSE	FALSE	FALSE	FALSE	FALSE	FALSE	FALSE
orfmaxCostuORFs030CBio	1343	0.127848	0.00345576	0.037	0.075	0.0287443	0.0624957	314	0.187278	0.00464813	0.435	0.461	0.469884	0.503474	0.228188	MIC not significant	FALSE	FALSE	FALSE	FALSE	FALSE	FALSE	FALSE	FALSE
orfmaxCostuORFs130CBio	1343	0.114485	0.00645756	0.648	0.886	0.64796	0.880596	755	0.130227	0.000281442	0.912	0.899	0.905469	0.888541	0.645348	MIC not significant	FALSE	FALSE	FALSE	FALSE	FALSE	FALSE	FALSE	FALSE
orfmaxCostuORFs230CBio	1343	0.101952	0.00257669	0.901	0.944	0.898376	0.936927	199	0.185245	0.000438088	0.749	0.668	0.766071	0.695111	0.76919	MIC not significant	FALSE	FALSE	FALSE	FALSE	FALSE	FALSE	FALSE	FALSE
orfmeanCostuORFs030CBio	1343	0.127848	0.00345935	0.039	0.071	0.0285145	0.0648202	314	0.187278	0.00469348	0.46	0.498	0.485206	0.526786	0.225928	MIC not significant	FALSE	FALSE	FALSE	FALSE	FALSE	FALSE	FALSE	FALSE
orfmeanCostuORFs130CBio	1343	0.115125	0.00443301	0.6	0.799	0.624448	0.798648	755	0.127724	0.000607075	0.956	0.944	0.945547	0.935306	0.499047	MIC not significant	FALSE	FALSE	FALSE	FALSE	FALSE	FALSE	FALSE	FALSE
orfmeanCostuORFs230CBio	1343	0.101952	0.0025323	0.906	0.955	0.902664	0.942355	199	0.196922	0.00116099	0.563	0.5	0.595945	0.525771	0.632811	MIC not significant	FALSE	FALSE	FALSE	FALSE	FALSE	FALSE	FALSE	FALSE
orfuORFs0200CBio	1343	0.145784	0.00634721	0.000236842	0.00211842	3.59922e-05	0.000700017	1214	0.143169	0.00295171	0.003	0.01	0.00214435	0.00476187	0.0584337	Non-monotone	TRUE	TRUE	FALSE	FALSE	TRUE	TRUE	FALSE	FALSE
orfuORFs1200CBio	1343	0.162187	0.0456774	0	0.480149	2.21581e-10	0.497495	1318	0.160769	0.0417162	0	0.44204	5.60299e-09	0.458142	7.04621e-14	non-significant monotone/non-monotone	TRUE	TRUE	FALSE	FALSE	TRUE	TRUE	FALSE	FALSE
orfuORFs2200CBio	1343	0.114109	0.00380112	0.617	0.775	0.637449	0.784801	819	0.14607	0.00637614	0.111	0.227	0.112438	0.247322	0.0222927	MIC not significant	FALSE	FALSE	FALSE	FALSE	FALSE	FALSE	FALSE	FALSE
orfmaxLenuORFs0200CBio	1343	0.115605	0.00970719	0.585	0.951	0.611826	0.938519	1214	0.124661	0.00613277	0.349	0.614	0.35689	0.63886	0.00633404	MIC not significant	FALSE	FALSE	FALSE	FALSE	FALSE	FALSE	FALSE	FALSE
orfmaxLenuORFs1200CBio	1343	0.116801	0.000273107	0.522	0.492	0.538157	0.511148	1318	0.118266	0.00124849	0.529	0.553	0.545447	0.569459	0.199858	MIC not significant	FALSE	FALSE	FALSE	FALSE	FALSE	FALSE	FALSE	FALSE
orfmaxLenuORFs2200CBio	1343	0.10766	0.00319398	0.915	0.964	0.912508	0.954612	819	0.146972	0.00396684	0.081	0.14	0.0900124	0.147251	0.0716257	MIC not significant	FALSE	FALSE	FALSE	FALSE	FALSE	FALSE	FALSE	FALSE
orfmeanLenuORFs0200CBio	1343	0.125042	0.00916192	0.169	0.631	0.167912	0.64274	1214	0.13136	0.00561325	0.134	0.348	0.134548	0.348442	0.00901621	MIC not significant	FALSE	FALSE	FALSE	FALSE	FALSE	FALSE	FALSE	FALSE
orfmeanLenuORFs1200CBio	1343	0.129241	0.0113611	0.052	0.411	0.0409829	0.430283	1318	0.130972	0.0166777	0.067	0.719	0.0629827	0.722582	2.55524e-06	MIC not significant	FALSE	FALSE	FALSE	FALSE	FALSE	FALSE	FALSE	FALSE
orfmeanLenuORFs2200CBio	1343	0.105554	0.00220026	0.957	0.976	0.948315	0.966663	819	0.156812	0.00137802	0.019	0.019	0.0115686	0.0122069	0.288645	MIC not significant	FALSE	FALSE	FALSE	FALSE	FALSE	FALSE	FALSE	FALSE
orfmaxCostuORFs0200CBio	1343	0.121533	0.00966112	0.401	0.918	0.415593	0.896911	1214	0.124967	0.00607858	0.517	0.808	0.543678	0.808344	0.00657091	MIC not significant	FALSE	FALSE	FALSE	FALSE	FALSE	FALSE	FALSE	FALSE
orfmaxCostuORFs1200CBio	1343	0.119379	0.000342297	0.439	0.403	0.463319	0.44001	1318	0.119554	0.00140136	0.607	0.649	0.62171	0.662076	0.174392	MIC not significant	FALSE	FALSE	FALSE	FALSE	FALSE	FALSE	FALSE	FALSE
orfmaxCostuORFs2200CBio	1343	0.110205	0.00293219	0.849	0.915	0.836619	0.900778	819	0.145937	0.00319071	0.144	0.187	0.138382	0.191451	0.106233	MIC not significant	FALSE	FALSE	FALSE	FALSE	FALSE	FALSE	FALSE	FALSE
orfmeanCostuORFs0200CBio	1343	0.128046	0.00912632	0.116	0.514	0.106554	0.537123	1214	0.131786	0.005573	0.208	0.416	0.198623	0.43554	0.00926732	MIC not significant	FALSE	FALSE	FALSE	FALSE	FALSE	FALSE	FALSE	FALSE
orfmeanCostuORFs1200CBio	1343	0.136012	0.0112014	0.014	0.187	0.00722187	0.20589	1318	0.137114	0.0164842	0.013	0.583	0.0131887	0.602662	2.92412e-06	non-significant monotone/non-monotone	FALSE	FALSE	FALSE	FALSE	TRUE	FALSE	FALSE	FALSE
orfmeanCostuORFs2200CBio	1343	0.113263	0.00180789	0.703	0.743	0.708045	0.75673	819	0.148005	0.000643487	0.107	0.099	0.101664	0.0903206	0.468473	MIC not significant	FALSE	FALSE	FALSE	FALSE	FALSE	FALSE	FALSE	FALSE
orfgcWin1	1343	0.125917	0.000891608	0.111	0.112	0.103522	0.107039	1343	0.125917	0.000891608	0.118	0.116	0.117672	0.120902	0.274176	MIC not significant	FALSE	FALSE	FALSE	FALSE	FALSE	FALSE	FALSE	FALSE
orfgcWin2	1343	0.114933	0.000687524	0.607	0.6	0.624465	0.621596	1343	0.114933	0.000687524	0.622	0.626	0.632116	0.628797	0.336965	MIC not significant	FALSE	FALSE	FALSE	FALSE	FALSE	FALSE	FALSE	FALSE
orfgcWin3	1343	0.114054	0.000883925	0.636	0.643	0.654948	0.66293	1343	0.114054	0.000883925	0.652	0.649	0.662117	0.665441	0.276254	MIC not significant	FALSE	FALSE	FALSE	FALSE	FALSE	FALSE	FALSE	FALSE
orfgcWin4	1343	0.114704	0.00066425	0.637	0.641	0.650997	0.646528	1343	0.114704	0.00066425	0.632	0.633	0.661629	0.65667	0.345281	MIC not significant	FALSE	FALSE	FALSE	FALSE	FALSE	FALSE	FALSE	FALSE
orfgcWin5	1343	0.11369	0.000656787	0.696	0.695	0.698345	0.692718	1343	0.11369	0.000656787	0.691	0.683	0.694925	0.691763	0.348007	MIC not significant	FALSE	FALSE	FALSE	FALSE	FALSE	FALSE	FALSE	FALSE
orfgcWin6	1343	0.115301	0.000342055	0.577	0.554	0.598813	0.576619	1343	0.115301	0.000342055	0.602	0.578	0.614083	0.591255	0.498278	MIC not significant	FALSE	FALSE	FALSE	FALSE	FALSE	FALSE	FALSE	FALSE
orfgcWin7	1343	0.118595	0.0006761	0.392	0.38	0.402259	0.396466	1343	0.118595	0.0006761	0.421	0.426	0.43598	0.430156	0.341013	MIC not significant	FALSE	FALSE	FALSE	FALSE	FALSE	FALSE	FALSE	FALSE
orfgcWin8	1343	0.116463	0.000181676	0.534	0.498	0.549997	0.517362	1343	0.116463	0.000181676	0.503	0.479	0.53361	0.502615	0.621648	MIC not significant	FALSE	FALSE	FALSE	FALSE	FALSE	FALSE	FALSE	FALSE
orfgcWin9	1343	0.124471	0.000312939	0.158	0.144	0.166721	0.151482	1343	0.124471	0.000312939	0.16	0.143	0.149049	0.136573	0.517157	MIC not significant	FALSE	FALSE	FALSE	FALSE	FALSE	FALSE	FALSE	FALSE
orfgcWin10	1343	0.110875	0.000220103	0.81	0.782	0.815654	0.794283	1343	0.110875	0.000220103	0.795	0.775	0.797288	0.778423	0.586983	MIC not significant	FALSE	FALSE	FALSE	FALSE	FALSE	FALSE	FALSE	FALSE
orfgcWin11	1343	0.114276	0.000395167	0.646	0.631	0.646923	0.632312	1343	0.114276	0.000395167	0.637	0.622	0.657848	0.638604	0.46668	MIC not significant	FALSE	FALSE	FALSE	FALSE	FALSE	FALSE	FALSE	FALSE
orfgcWin12	1343	0.122221	0.000323749	0.241	0.218	0.249945	0.232104	1343	0.122221	0.000323749	0.241	0.231	0.24435	0.225881	0.510006	MIC not significant	FALSE	FALSE	FALSE	FALSE	FALSE	FALSE	FALSE	FALSE
orfgcWin13	1343	0.12915	0.00125981	0.054	0.061	0.0482076	0.0558104	1343	0.12915	0.00125981	0.048	0.054	0.04592	0.0523897	0.193622	MIC not significant	FALSE	FALSE	FALSE	FALSE	FALSE	FALSE	FALSE	FALSE
orfgcWin14	1343	0.122816	0.000789528	0.198	0.209	0.209881	0.213042	1343	0.122816	0.000789528	0.21	0.207	0.226452	0.226474	0.303493	MIC not significant	FALSE	FALSE	FALSE	FALSE	FALSE	FALSE	FALSE	FALSE
orfgcWin15	1343	0.130367	0.00110043	0.044	0.048	0.0318229	0.0359539	1343	0.130367	0.00110043	0.045	0.056	0.0397292	0.0440004	0.224411	non-significant monotone/non-monotone	FALSE	FALSE	FALSE	FALSE	FALSE	FALSE	FALSE	FALSE
orfgcWin16	1343	0.126664	0.00141533	0.095	0.118	0.104982	0.119616	1343	0.126664	0.00141533	0.089	0.112	0.0870044	0.104068	0.168236	MIC not significant	FALSE	FALSE	FALSE	FALSE	FALSE	FALSE	FALSE	FALSE
orfgcWin17	1343	0.125968	0.00165103	0.111	0.146	0.105104	0.130587	1343	0.125968	0.00165103	0.109	0.138	0.109137	0.132412	0.136672	MIC not significant	FALSE	FALSE	FALSE	FALSE	FALSE	FALSE	FALSE	FALSE
orfgcWin18	1343	0.123099	0.00236779	0.195	0.262	0.206271	0.276544	1343	0.123099	0.00236779	0.196	0.254	0.200079	0.272934	0.0746458	MIC not significant	FALSE	FALSE	FALSE	FALSE	FALSE	FALSE	FALSE	FALSE
orfgcWin19	1343	0.123891	0.00265788	0.161	0.24	0.178414	0.257728	1343	0.123891	0.00265788	0.162	0.236	0.161829	0.237217	0.058916	MIC not significant	FALSE	FALSE	FALSE	FALSE	FALSE	FALSE	FALSE	FALSE
orfgcWin20	1343	0.125403	0.00264234	0.128	0.19	0.129185	0.19156	1343	0.125403	0.00264234	0.112	0.175	0.11677	0.176228	0.0596625	MIC not significant	FALSE	FALSE	FALSE	FALSE	FALSE	FALSE	FALSE	FALSE
orfgcWin21	1343	0.130035	0.00556138	0.048	0.136	0.0374851	0.13272	1343	0.130035	0.00556138	0.051	0.15	0.0440651	0.146205	0.00625326	MIC not significant	FALSE	FALSE	FALSE	FALSE	FALSE	FALSE	FALSE	FALSE
orfgcWin22	1343	0.126624	0.00431312	0.106	0.221	0.100365	0.214024	1343	0.126624	0.00431312	0.081	0.176	0.0834023	0.191906	0.0160788	MIC not significant	FALSE	FALSE	FALSE	FALSE	FALSE	FALSE	FALSE	FALSE
orfgcWin23	1343	0.133925	0.00331925	0.013	0.026	0.00895082	0.0226153	1343	0.133925	0.00331925	0.006	0.017	0.00730194	0.0186088	0.0347614	Non-monotone	FALSE	FALSE	FALSE	FALSE	FALSE	FALSE	FALSE	FALSE
orfgcWin24	1343	0.127631	0.00371319	0.08	0.158	0.0780704	0.151151	1343	0.127631	0.00371319	0.07	0.137	0.0634633	0.135349	0.0255414	MIC not significant	FALSE	FALSE	FALSE	FALSE	FALSE	FALSE	FALSE	FALSE
orfgcWin25	1343	0.140232	0.00330286	0.001	0.003	0.000407807	0.00140624	1343	0.140232	0.00330286	0.001	0.007	0.000928863	0.00283529	0.0352131	Non-monotone	TRUE	TRUE	FALSE	FALSE	TRUE	TRUE	FALSE	FALSE
orfgcWin26	1343	0.130603	0.00329955	0.035	0.068	0.0290639	0.0613169	1343	0.130603	0.00329955	0.037	0.066	0.0301456	0.0614312	0.035305	non-significant monotone/non-monotone	FALSE	FALSE	FALSE	FALSE	FALSE	FALSE	FALSE	FALSE
orfgcWin27	1343	0.128771	0.00321283	0.061	0.101	0.049731	0.098409	1343	0.128771	0.00321283	0.065	0.121	0.0595246	0.112144	0.0378058	MIC not significant	FALSE	FALSE	FALSE	FALSE	FALSE	FALSE	FALSE	FALSE
orfgcWin28	1343	0.126036	0.0040647	0.103	0.202	0.0930226	0.198962	1343	0.126036	0.0040647	0.105	0.208	0.0997366	0.203623	0.0194585	MIC not significant	FALSE	FALSE	FALSE	FALSE	FALSE	FALSE	FALSE	FALSE
orfgcWin29	1343	0.128669	0.00449428	0.066	0.164	0.0623044	0.155085	1343	0.128669	0.00449428	0.063	0.16	0.0592249	0.147733	0.0139998	MIC not significant	FALSE	FALSE	FALSE	FALSE	FALSE	FALSE	FALSE	FALSE
orfgcWin30	1343	0.134325	0.00501236	0.013	0.047	0.00873975	0.0375658	1343	0.134325	0.00501236	0.007	0.04	0.00660308	0.0327703	0.00944884	Non-monotone	FALSE	FALSE	FALSE	FALSE	FALSE	FALSE	FALSE	FALSE
orfgcWin31	1343	0.137154	0.00469186	0.007	0.021	0.00302754	0.0129652	1343	0.137154	0.00469186	0.005	0.024	0.00349858	0.0156804	0.0120449	Non-monotone	FALSE	FALSE	FALSE	FALSE	TRUE	TRUE	FALSE	FALSE
orfgcWin32	1343	0.12976	0.00383348	0.042	0.098	0.040179	0.0941144	1343	0.12976	0.00383348	0.042	0.099	0.037785	0.0896248	0.0232643	non-significant monotone/non-monotone	FALSE	FALSE	FALSE	FALSE	FALSE	FALSE	FALSE	FALSE
orfgcWin33	1343	0.131179	0.00248644	0.034	0.058	0.0281924	0.0490127	1343	0.131179	0.00248644	0.036	0.055	0.0285009	0.0474611	0.0677289	non-significant monotone/non-monotone	FALSE	FALSE	FALSE	FALSE	FALSE	FALSE	FALSE	FALSE
orfgcWin34	1343	0.122501	0.00213585	0.224	0.287	0.222594	0.285984	1343	0.122501	0.00213585	0.222	0.284	0.237554	0.300206	0.0904603	MIC not significant	FALSE	FALSE	FALSE	FALSE	FALSE	FALSE	FALSE	FALSE
orfgcWin35	1343	0.129296	0.00162728	0.049	0.063	0.0471471	0.0623235	1343	0.129296	0.00162728	0.051	0.063	0.0416948	0.0554498	0.139529	MIC not significant	FALSE	FALSE	FALSE	FALSE	FALSE	FALSE	FALSE	FALSE
orfgcWin36	1343	0.132704	0.0012867	0.02	0.022	0.012944	0.0161913	1343	0.132704	0.0012867	0.02	0.026	0.0150043	0.0181432	0.188931	Non-monotone	FALSE	FALSE	FALSE	FALSE	FALSE	FALSE	FALSE	FALSE
orfgcWin37	1343	0.128216	0.00157807	0.072	0.099	0.0702882	0.0874963	1343	0.128216	0.00157807	0.058	0.074	0.0568245	0.0707205	0.145665	MIC not significant	FALSE	FALSE	FALSE	FALSE	FALSE	FALSE	FALSE	FALSE
orfgcWin38	1343	0.124542	0.00146878	0.158	0.175	0.152876	0.177557	1343	0.124542	0.00146878	0.146	0.163	0.156684	0.184664	0.160411	MIC not significant	FALSE	FALSE	FALSE	FALSE	FALSE	FALSE	FALSE	FALSE
orfgcWin39	1343	0.126195	0.00194966	0.098	0.128	0.0982729	0.131413	1343	0.126195	0.00194966	0.116	0.15	0.112805	0.14685	0.105786	MIC not significant	FALSE	FALSE	FALSE	FALSE	FALSE	FALSE	FALSE	FALSE
orfgcWin40	1343	0.123364	0.00215487	0.204	0.249	0.202208	0.258685	1343	0.123364	0.00215487	0.178	0.23	0.192052	0.247335	0.0890361	MIC not significant	FALSE	FALSE	FALSE	FALSE	FALSE	FALSE	FALSE	FALSE
orfgcWin41	1343	0.123314	0.00137552	0.186	0.204	0.180672	0.203485	1343	0.123314	0.00137552	0.188	0.207	0.187916	0.211049	0.174348	MIC not significant	FALSE	FALSE	FALSE	FALSE	FALSE	FALSE	FALSE	FALSE
orfgcWin42	1343	0.124399	0.00183548	0.156	0.2	0.151275	0.186903	1343	0.124399	0.00183548	0.153	0.19	0.164584	0.204427	0.116577	MIC not significant	FALSE	FALSE	FALSE	FALSE	FALSE	FALSE	FALSE	FALSE
orfgcWin43	1343	0.121057	0.0020845	0.286	0.345	0.294883	0.36351	1343	0.121057	0.0020845	0.288	0.357	0.293445	0.357604	0.0944298	MIC not significant	FALSE	FALSE	FALSE	FALSE	FALSE	FALSE	FALSE	FALSE
orfgcWin44	1343	0.116759	0.00243076	0.531	0.616	0.526971	0.620046	1343	0.116759	0.00243076	0.514	0.607	0.517504	0.609932	0.0708853	MIC not significant	FALSE	FALSE	FALSE	FALSE	FALSE	FALSE	FALSE	FALSE
orfgcWin45	1343	0.113383	0.00157015	0.665	0.71	0.678513	0.718005	1343	0.113383	0.00157015	0.658	0.713	0.691922	0.730606	0.14668	MIC not significant	FALSE	FALSE	FALSE	FALSE	FALSE	FALSE	FALSE	FALSE
orfgcWin46	1343	0.116107	0.0013612	0.52	0.552	0.542711	0.577632	1343	0.116107	0.0013612	0.551	0.586	0.558935	0.588807	0.176609	MIC not significant	FALSE	FALSE	FALSE	FALSE	FALSE	FALSE	FALSE	FALSE
orfgcWin47	1343	0.11462	0.000899836	0.619	0.634	0.640972	0.64914	1343	0.11462	0.000899836	0.639	0.652	0.648499	0.652988	0.271972	MIC not significant	FALSE	FALSE	FALSE	FALSE	FALSE	FALSE	FALSE	FALSE
orfgcWin48	1343	0.117593	0.0009621	0.466	0.48	0.475717	0.487219	1343	0.117593	0.0009621	0.454	0.468	0.484534	0.496482	0.25599	MIC not significant	FALSE	FALSE	FALSE	FALSE	FALSE	FALSE	FALSE	FALSE
orfgcWin49	1343	0.116093	0.000932324	0.542	0.547	0.558053	0.56697	1343	0.116093	0.000932324	0.575	0.579	0.573696	0.582852	0.263483	MIC not significant	FALSE	FALSE	FALSE	FALSE	FALSE	FALSE	FALSE	FALSE
orfgcWin50	1343	0.110209	0.00110808	0.834	0.846	0.829215	0.841551	1343	0.110209	0.00110808	0.844	0.856	0.836264	0.849279	0.222806	MIC not significant	FALSE	FALSE	FALSE	FALSE	FALSE	FALSE	FALSE	FALSE
orfgcWin51	1343	0.122959	0.000988997	0.221	0.224	0.212766	0.223509	1343	0.122959	0.000988997	0.197	0.203	0.205224	0.215447	0.249446	MIC not significant	FALSE	FALSE	FALSE	FALSE	FALSE	FALSE	FALSE	FALSE
orfgcWin52	1343	0.118988	0.00115426	0.376	0.398	0.412001	0.430844	1343	0.118988	0.00115426	0.38	0.404	0.399029	0.422437	0.213404	MIC not significant	FALSE	FALSE	FALSE	FALSE	FALSE	FALSE	FALSE	FALSE
orfgcWin53	1343	0.120387	0.000350934	0.317	0.298	0.316124	0.298433	1343	0.120387	0.000350934	0.311	0.297	0.329447	0.30938	0.492753	MIC not significant	FALSE	FALSE	FALSE	FALSE	FALSE	FALSE	FALSE	FALSE
orfgcWin54	1343	0.119608	0.000942504	0.357	0.362	0.362219	0.375048	1343	0.119608	0.000942504	0.365	0.38	0.369236	0.380204	0.260891	MIC not significant	FALSE	FALSE	FALSE	FALSE	FALSE	FALSE	FALSE	FALSE
orfgcWin55	1343	0.119357	0.000264836	0.352	0.325	0.359748	0.334105	1343	0.119357	0.000264836	0.358	0.33	0.367539	0.338967	0.551263	MIC not significant	FALSE	FALSE	FALSE	FALSE	FALSE	FALSE	FALSE	FALSE
orfgcWin56	1343	0.120044	0.000371149	0.357	0.341	0.363437	0.344096	1343	0.120044	0.000371149	0.355	0.337	0.377262	0.358544	0.480549	MIC not significant	FALSE	FALSE	FALSE	FALSE	FALSE	FALSE	FALSE	FALSE
orfgcWin57	1343	0.119251	0.000469313	0.372	0.359	0.403934	0.389144	1343	0.119251	0.000469313	0.359	0.338	0.368607	0.350145	0.427626	MIC not significant	FALSE	FALSE	FALSE	FALSE	FALSE	FALSE	FALSE	FALSE
orfgcWin58	1343	0.113172	0.000226276	0.704	0.68	0.716294	0.690463	1343	0.113172	0.000226276	0.709	0.683	0.712498	0.687654	0.581785	MIC not significant	FALSE	FALSE	FALSE	FALSE	FALSE	FALSE	FALSE	FALSE
orfgcWin59	1343	0.118378	0.00010081	0.402	0.38	0.428209	0.395433	1343	0.118378	0.00010081	0.41	0.38	0.425459	0.395044	0.713158	MIC not significant	FALSE	FALSE	FALSE	FALSE	FALSE	FALSE	FALSE	FALSE
orfgcWin60	1343	0.123318	0.000115479	0.196	0.178	0.20612	0.179478	1343	0.123318	0.000115479	0.189	0.167	0.193577	0.169875	0.693982	MIC not significant	FALSE	FALSE	FALSE	FALSE	FALSE	FALSE	FALSE	FALSE
orfgcWin61	1343	0.118884	8.50502e-05	0.408	0.368	0.427461	0.390347	1343	0.118884	8.50502e-05	0.383	0.351	0.403375	0.365216	0.735619	MIC not significant	FALSE	FALSE	FALSE	FALSE	FALSE	FALSE	FALSE	FALSE
orfgcWin62	1343	0.109769	0.000643396	0.869	0.865	0.85467	0.850833	1343	0.109769	0.000643396	0.853	0.855	0.84572	0.84553	0.35297	MIC not significant	FALSE	FALSE	FALSE	FALSE	FALSE	FALSE	FALSE	FALSE
orfgcWin63	1343	0.113953	0.000556219	0.656	0.645	0.672478	0.661022	1343	0.113953	0.000556219	0.673	0.675	0.683062	0.673811	0.387803	MIC not significant	FALSE	FALSE	FALSE	FALSE	FALSE	FALSE	FALSE	FALSE
orfgcWin64	1343	0.117667	0.000132912	0.466	0.434	0.48458	0.448801	1343	0.117667	0.000132912	0.444	0.408	0.465484	0.429606	0.672942	MIC not significant	FALSE	FALSE	FALSE	FALSE	FALSE	FALSE	FALSE	FALSE
orfgcWin65	1343	0.121399	0.000187369	0.28	0.248	0.278057	0.252462	1343	0.121399	0.000187369	0.26	0.235	0.268799	0.243903	0.616237	MIC not significant	FALSE	FALSE	FALSE	FALSE	FALSE	FALSE	FALSE	FALSE
orfgcWin66	1343	0.124316	0.00049007	0.177	0.168	0.17366	0.163844	1343	0.124316	0.00049007	0.177	0.169	0.170808	0.161524	0.417586	MIC not significant	FALSE	FALSE	FALSE	FALSE	FALSE	FALSE	FALSE	FALSE
orfgcWin67	1343	0.120991	0.000239129	0.261	0.238	0.271416	0.248566	1343	0.120991	0.000239129	0.292	0.278	0.291933	0.268519	0.571253	MIC not significant	FALSE	FALSE	FALSE	FALSE	FALSE	FALSE	FALSE	FALSE
orfgcWin68	1343	0.117307	0.000111919	0.454	0.407	0.470306	0.435287	1343	0.117307	0.000111919	0.456	0.43	0.480173	0.44331	0.698501	MIC not significant	FALSE	FALSE	FALSE	FALSE	FALSE	FALSE	FALSE	FALSE
orfgcWin69	1343	0.129197	0.000380775	0.061	0.054	0.0496985	0.0436259	1343	0.129197	0.000380775	0.051	0.048	0.0468439	0.0426155	0.474911	MIC not significant	FALSE	FALSE	FALSE	FALSE	FALSE	FALSE	FALSE	FALSE
orfgcWin70	1343	0.131599	0.000107092	0.024	0.022	0.0188846	0.0151836	1343	0.131599	0.000107092	0.037	0.029	0.0245781	0.0196212	0.704763	Non-monotone	FALSE	FALSE	FALSE	FALSE	FALSE	FALSE	FALSE	FALSE
orfgcWin71	1343	0.1284	0.000323252	0.061	0.053	0.060017	0.0535532	1343	0.1284	0.000323252	0.076	0.066	0.0721633	0.064683	0.51033	MIC not significant	FALSE	FALSE	FALSE	FALSE	FALSE	FALSE	FALSE	FALSE
orfgcWin72	1343	0.117742	0.000602889	0.471	0.456	0.474336	0.466754	1343	0.117742	0.000602889	0.445	0.438	0.460652	0.453049	0.368589	MIC not significant	FALSE	FALSE	FALSE	FALSE	FALSE	FALSE	FALSE	FALSE
orfgcWin73	1343	0.119676	0.00078481	0.358	0.371	0.371721	0.374577	1343	0.119676	0.00078481	0.382	0.392	0.383179	0.38573	0.304943	MIC not significant	FALSE	FALSE	FALSE	FALSE	FALSE	FALSE	FALSE	FALSE
orfgcWin74	1343	0.126197	0.00081041	0.079	0.084	0.0819306	0.0821304	1343	0.126197	0.00081041	0.113	0.112	0.111701	0.112407	0.297182	MIC not significant	FALSE	FALSE	FALSE	FALSE	FALSE	FALSE	FALSE	FALSE
orfgcWin75	1343	0.125444	0.0011815	0.145	0.153	0.141966	0.153585	1343	0.125444	0.0011815	0.123	0.138	0.121805	0.136598	0.20808	MIC not significant	FALSE	FALSE	FALSE	FALSE	FALSE	FALSE	FALSE	FALSE
orfgcWin76	1343	0.120872	0.0011832	0.279	0.305	0.286359	0.305812	1343	0.120872	0.0011832	0.284	0.307	0.304542	0.32748	0.207752	MIC not significant	FALSE	FALSE	FALSE	FALSE	FALSE	FALSE	FALSE	FALSE
orfgcWin77	1343	0.126144	0.00162192	0.11	0.129	0.109527	0.131898	1343	0.126144	0.00162192	0.128	0.151	0.114658	0.138303	0.140183	MIC not significant	FALSE	FALSE	FALSE	FALSE	FALSE	FALSE	FALSE	FALSE
orfgcWin78	1343	0.118104	0.00204536	0.412	0.494	0.427018	0.496225	1343	0.118104	0.00204536	0.422	0.502	0.437492	0.513486	0.0975825	MIC not significant	FALSE	FALSE	FALSE	FALSE	FALSE	FALSE	FALSE	FALSE
orfgcWin79	1343	0.121114	0.00181179	0.286	0.346	0.302269	0.356859	1343	0.121114	0.00181179	0.285	0.331	0.295824	0.348063	0.118964	MIC not significant	FALSE	FALSE	FALSE	FALSE	FALSE	FALSE	FALSE	FALSE
orfgcWin80	1343	0.120163	0.000980364	0.341	0.343	0.359436	0.368744	1343	0.120163	0.000980364	0.326	0.345	0.354984	0.369876	0.251523	MIC not significant	FALSE	FALSE	FALSE	FALSE	FALSE	FALSE	FALSE	FALSE
orfgcWin81	1343	0.120944	0.00179046	0.288	0.351	0.306039	0.357758	1343	0.120944	0.00179046	0.298	0.346	0.302649	0.355484	0.12116	MIC not significant	FALSE	FALSE	FALSE	FALSE	FALSE	FALSE	FALSE	FALSE
orfgcWin82	1343	0.119127	0.00185639	0.381	0.436	0.40523	0.464995	1343	0.119127	0.00185639	0.378	0.42	0.401987	0.462217	0.114513	MIC not significant	FALSE	FALSE	FALSE	FALSE	FALSE	FALSE	FALSE	FALSE
orfgcWin83	1343	0.125218	0.00201186	0.117	0.159	0.120155	0.160864	1343	0.125218	0.00201186	0.127	0.164	0.126442	0.166174	0.100373	MIC not significant	FALSE	FALSE	FALSE	FALSE	FALSE	FALSE	FALSE	FALSE
orfgcWin84	1343	0.120668	0.000696083	0.31	0.311	0.323026	0.319244	1343	0.120668	0.000696083	0.323	0.32	0.325717	0.322657	0.333975	MIC not significant	FALSE	FALSE	FALSE	FALSE	FALSE	FALSE	FALSE	FALSE
orfgcWin85	1343	0.118447	0.00104007	0.409	0.423	0.43564	0.453375	1343	0.118447	0.00104007	0.406	0.423	0.420955	0.437375	0.237574	MIC not significant	FALSE	FALSE	FALSE	FALSE	FALSE	FALSE	FALSE	FALSE
orfgcWin86	1343	0.129171	0.00109411	0.064	0.065	0.0531732	0.0587257	1343	0.129171	0.00109411	0.051	0.055	0.0403569	0.0459813	0.225748	MIC not significant	FALSE	FALSE	FALSE	FALSE	FALSE	FALSE	FALSE	FALSE
orfgcWin87	1343	0.128098	0.000915228	0.074	0.074	0.0642339	0.0655494	1343	0.128098	0.000915228	0.081	0.085	0.067874	0.0712205	0.267908	MIC not significant	FALSE	FALSE	FALSE	FALSE	FALSE	FALSE	FALSE	FALSE
orfgcWin88	1343	0.114826	0.000593975	0.628	0.617	0.641379	0.634008	1343	0.114826	0.000593975	0.644	0.642	0.657716	0.650613	0.372154	MIC not significant	FALSE	FALSE	FALSE	FALSE	FALSE	FALSE	FALSE	FALSE
orfgcWin89	1343	0.120348	0.000361436	0.314	0.299	0.328694	0.307563	1343	0.120348	0.000361436	0.339	0.315	0.343643	0.323145	0.48635	MIC not significant	FALSE	FALSE	FALSE	FALSE	FALSE	FALSE	FALSE	FALSE
orfgcWin90	1343	0.114008	0.000928372	0.65	0.666	0.65517	0.666175	1343	0.114008	0.000928372	0.651	0.658	0.664766	0.674051	0.264498	MIC not significant	FALSE	FALSE	FALSE	FALSE	FALSE	FALSE	FALSE	FALSE
orfgcWin91	1343	0.121189	0.00138419	0.3	0.327	0.306259	0.334646	1343	0.121189	0.00138419	0.272	0.304	0.279941	0.308307	0.172995	MIC not significant	FALSE	FALSE	FALSE	FALSE	FALSE	FALSE	FALSE	FALSE
orfgcWin92	1343	0.118295	0.00109785	0.406	0.423	0.430826	0.448251	1343	0.118295	0.00109785	0.449	0.467	0.452604	0.473699	0.224954	MIC not significant	FALSE	FALSE	FALSE	FALSE	FALSE	FALSE	FALSE	FALSE
orfgcWin93	1343	0.122709	0.00158521	0.187	0.205	0.20076	0.232098	1343	0.122709	0.00158521	0.224	0.255	0.223031	0.260821	0.144756	MIC not significant	FALSE	FALSE	FALSE	FALSE	FALSE	FALSE	FALSE	FALSE
orfgcWin94	1343	0.116118	0.00101908	0.563	0.574	0.574047	0.591356	1343	0.116118	0.00101908	0.536	0.545	0.547467	0.561577	0.242368	MIC not significant	FALSE	FALSE	FALSE	FALSE	FALSE	FALSE	FALSE	FALSE
orfgcWin95	1343	0.117227	0.000909219	0.462	0.467	0.482546	0.48857	1343	0.117227	0.000909219	0.535	0.549	0.548873	0.55821	0.269486	MIC not significant	FALSE	FALSE	FALSE	FALSE	FALSE	FALSE	FALSE	FALSE
orfgcWin96	1343	0.125158	0.000815984	0.134	0.136	0.134467	0.138867	1343	0.125158	0.000815984	0.141	0.136	0.139684	0.138618	0.295526	MIC not significant	FALSE	FALSE	FALSE	FALSE	FALSE	FALSE	FALSE	FALSE
orfgcWin97	1343	0.121905	0.000718696	0.25	0.246	0.250496	0.249305	1343	0.121905	0.000718696	0.236	0.241	0.262186	0.262947	0.326242	MIC not significant	FALSE	FALSE	FALSE	FALSE	FALSE	FALSE	FALSE	FALSE
orfgcWin98	1343	0.125087	0.000773229	0.152	0.16	0.151807	0.152948	1343	0.125087	0.000773229	0.15	0.147	0.148353	0.148471	0.30854	MIC not significant	FALSE	FALSE	FALSE	FALSE	FALSE	FALSE	FALSE	FALSE
orfgcWin99	1343	0.12325	0.001535	0.207	0.251	0.207991	0.243255	1343	0.12325	0.001535	0.208	0.231	0.195088	0.227177	0.151285	MIC not significant	FALSE	FALSE	FALSE	FALSE	FALSE	FALSE	FALSE	FALSE
orfgcWin100	1343	0.124592	0.000978177	0.147	0.144	0.142815	0.14913	1343	0.124592	0.000978177	0.158	0.165	0.159376	0.167563	0.252053	MIC not significant	FALSE	FALSE	FALSE	FALSE	FALSE	FALSE	FALSE	FALSE
orfmeanFEWin1	1343	0.10251	0.00261535	0.987	0.991	0.974168	0.985853	1343	0.10251	0.00261535	0.986	0.993	0.980336	0.989663	0.0609822	MIC not significant	FALSE	FALSE	FALSE	FALSE	FALSE	FALSE	FALSE	FALSE
orfmeanFEWin2	1343	0.113331	0.00247992	0.669	0.763	0.694133	0.768174	1343	0.113331	0.00247992	0.699	0.785	0.691702	0.776942	0.0680903	MIC not significant	FALSE	FALSE	FALSE	FALSE	FALSE	FALSE	FALSE	FALSE
orfmeanFEWin3	1343	0.116415	0.00273383	0.517	0.631	0.539003	0.648092	1343	0.116415	0.00273383	0.52	0.645	0.548811	0.658245	0.0554098	MIC not significant	FALSE	FALSE	FALSE	FALSE	FALSE	FALSE	FALSE	FALSE
orfmeanFEWin4	1343	0.118532	0.00340805	0.402	0.581	0.432997	0.588874	1343	0.118532	0.00340805	0.402	0.551	0.428971	0.57627	0.0324174	MIC not significant	FALSE	FALSE	FALSE	FALSE	FALSE	FALSE	FALSE	FALSE
orfmeanFEWin5	1343	0.119887	0.00525109	0.344	0.596	0.357204	0.605437	1343	0.119887	0.00525109	0.313	0.562	0.335824	0.587437	0.00789283	MIC not significant	FALSE	FALSE	FALSE	FALSE	FALSE	FALSE	FALSE	FALSE
orfmeanFEWin6	1343	0.118479	0.00336825	0.403	0.526	0.413984	0.552594	1343	0.118479	0.00336825	0.427	0.573	0.447979	0.592389	0.0334468	MIC not significant	FALSE	FALSE	FALSE	FALSE	FALSE	FALSE	FALSE	FALSE
orfmeanFEWin7	1343	0.123805	0.000979918	0.183	0.185	0.183472	0.193213	1343	0.123805	0.000979918	0.188	0.192	0.192472	0.202715	0.251631	MIC not significant	FALSE	FALSE	FALSE	FALSE	FALSE	FALSE	FALSE	FALSE
orfmeanFEWin8	1343	0.115651	0.000810895	0.58	0.57	0.600935	0.602038	1343	0.115651	0.000810895	0.538	0.535	0.563882	0.56674	0.297038	MIC not significant	FALSE	FALSE	FALSE	FALSE	FALSE	FALSE	FALSE	FALSE
orfmeanFEWin9	1343	0.110993	0.000917533	0.788	0.801	0.796602	0.80509	1343	0.110993	0.000917533	0.81	0.821	0.803936	0.811221	0.267306	MIC not significant	FALSE	FALSE	FALSE	FALSE	FALSE	FALSE	FALSE	FALSE
orfmeanFEWin10	1343	0.110246	0.00136969	0.826	0.856	0.831939	0.854017	1343	0.110246	0.00136969	0.858	0.884	0.849128	0.870014	0.175264	MIC not significant	FALSE	FALSE	FALSE	FALSE	FALSE	FALSE	FALSE	FALSE
orfmeanFEWin11	1343	0.111257	0.00230872	0.776	0.837	0.787198	0.840405	1343	0.111257	0.00230872	0.797	0.859	0.791772	0.852617	0.0783686	MIC not significant	FALSE	FALSE	FALSE	FALSE	FALSE	FALSE	FALSE	FALSE
orfmeanFEWin12	1343	0.114774	0.00168616	0.612	0.673	0.622785	0.676916	1343	0.114774	0.00168616	0.638	0.704	0.65064	0.698131	0.132565	MIC not significant	FALSE	FALSE	FALSE	FALSE	FALSE	FALSE	FALSE	FALSE
orfmeanFEWin13	1343	0.114552	0.000933951	0.634	0.641	0.653788	0.663263	1343	0.114552	0.000933951	0.646	0.661	0.662357	0.673483	0.263067	MIC not significant	FALSE	FALSE	FALSE	FALSE	FALSE	FALSE	FALSE	FALSE
orfmeanFEWin14	1343	0.113377	0.000540001	0.703	0.675	0.70084	0.688607	1343	0.113377	0.000540001	0.702	0.684	0.702771	0.692416	0.394813	MIC not significant	FALSE	FALSE	FALSE	FALSE	FALSE	FALSE	FALSE	FALSE
orfmeanFEWin15	1343	0.105261	0.00027643	0.97	0.96	0.954126	0.946621	1343	0.105261	0.00027643	0.963	0.955	0.960419	0.953572	0.542674	MIC not significant	FALSE	FALSE	FALSE	FALSE	FALSE	FALSE	FALSE	FALSE
orfmeanFEWin16	1343	0.105149	9.369e-08	0.965	0.96	0.9583	0.94845	1343	0.105149	9.369e-08	0.967	0.959	0.961162	0.951524	0.991058	MIC not significant	FALSE	FALSE	FALSE	FALSE	FALSE	FALSE	FALSE	FALSE
orfmeanFEWin17	1343	0.103016	3.31914e-06	0.976	0.97	0.971186	0.964093	1343	0.103016	3.31914e-06	0.983	0.978	0.97369	0.967193	0.946818	MIC not significant	FALSE	FALSE	FALSE	FALSE	FALSE	FALSE	FALSE	FALSE
orfmeanFEWin18	1343	0.104876	0.000112719	0.971	0.96	0.961898	0.952405	1343	0.104876	0.000112719	0.968	0.959	0.956101	0.946402	0.697478	MIC not significant	FALSE	FALSE	FALSE	FALSE	FALSE	FALSE	FALSE	FALSE
orfmeanFEWin19	1343	0.105693	0.000801474	0.951	0.951	0.94835	0.94983	1343	0.105693	0.000801474	0.946	0.954	0.937482	0.939838	0.299862	MIC not significant	FALSE	FALSE	FALSE	FALSE	FALSE	FALSE	FALSE	FALSE
orfmeanFEWin20	1343	0.104194	0.00108758	0.978	0.98	0.967419	0.970914	1343	0.104194	0.00108758	0.979	0.981	0.96325	0.967891	0.227138	MIC not significant	FALSE	FALSE	FALSE	FALSE	FALSE	FALSE	FALSE	FALSE
orfmeanFEWin21	1343	0.120072	0.00119844	0.337	0.352	0.351278	0.375485	1343	0.120072	0.00119844	0.344	0.362	0.359443	0.385317	0.204848	MIC not significant	FALSE	FALSE	FALSE	FALSE	FALSE	FALSE	FALSE	FALSE
orfmeanFEWin22	1343	0.121917	0.00171321	0.256	0.296	0.260721	0.30634	1343	0.121917	0.00171321	0.258	0.292	0.25606	0.299268	0.129497	MIC not significant	FALSE	FALSE	FALSE	FALSE	FALSE	FALSE	FALSE	FALSE
orfmeanFEWin23	1343	0.126019	0.00185156	0.133	0.159	0.117946	0.148394	1343	0.126019	0.00185156	0.113	0.134	0.11218	0.141229	0.114987	MIC not significant	FALSE	FALSE	FALSE	FALSE	FALSE	FALSE	FALSE	FALSE
orfmeanFEWin24	1343	0.122139	0.0019585	0.246	0.29	0.255924	0.310784	1343	0.122139	0.0019585	0.243	0.296	0.252182	0.307404	0.104998	MIC not significant	FALSE	FALSE	FALSE	FALSE	FALSE	FALSE	FALSE	FALSE
orfmeanFEWin25	1343	0.125486	0.00271425	0.12	0.177	0.11812	0.178683	1343	0.125486	0.00271425	0.114	0.185	0.114984	0.175487	0.0562919	MIC not significant	FALSE	FALSE	FALSE	FALSE	FALSE	FALSE	FALSE	FALSE
orfmeanFEWin26	1343	0.121614	0.00212432	0.25	0.316	0.254194	0.321643	1343	0.121614	0.00212432	0.283	0.349	0.267878	0.338776	0.0913353	MIC not significant	FALSE	FALSE	FALSE	FALSE	FALSE	FALSE	FALSE	FALSE
orfmeanFEWin27	1343	0.124177	0.00250534	0.173	0.233	0.173197	0.239586	1343	0.124177	0.00250534	0.158	0.232	0.163675	0.233173	0.0666919	MIC not significant	FALSE	FALSE	FALSE	FALSE	FALSE	FALSE	FALSE	FALSE
orfmeanFEWin28	1343	0.114731	0.00437675	0.613	0.8	0.623615	0.798638	1343	0.114731	0.00437675	0.598	0.784	0.618311	0.786104	0.0153146	MIC not significant	FALSE	FALSE	FALSE	FALSE	FALSE	FALSE	FALSE	FALSE
orfmeanFEWin29	1343	0.104447	0.00419895	0.975	0.994	0.962377	0.988054	1343	0.104447	0.00419895	0.983	0.993	0.965755	0.98864	0.0175497	MIC not significant	FALSE	FALSE	FALSE	FALSE	FALSE	FALSE	FALSE	FALSE
orfmeanFEWin30	1343	0.11568	0.0044565	0.598	0.773	0.590715	0.776692	1343	0.11568	0.0044565	0.574	0.774	0.593169	0.772095	0.0144093	MIC not significant	FALSE	FALSE	FALSE	FALSE	FALSE	FALSE	FALSE	FALSE
orfmeanFEWin31	1343	0.118234	0.00565714	0.424	0.686	0.434327	0.697114	1343	0.118234	0.00565714	0.429	0.694	0.445333	0.703795	0.00582089	MIC not significant	FALSE	FALSE	FALSE	FALSE	FALSE	FALSE	FALSE	FALSE
orfmeanFEWin32	1343	0.113542	0.00557978	0.666	0.871	0.689994	0.878022	1343	0.113542	0.00557978	0.671	0.893	0.694326	0.883631	0.0061677	MIC not significant	FALSE	FALSE	FALSE	FALSE	FALSE	FALSE	FALSE	FALSE
orfmeanFEWin33	1343	0.114689	0.00441893	0.621	0.808	0.63678	0.80937	1343	0.114689	0.00441893	0.629	0.809	0.64801	0.817173	0.0148288	MIC not significant	FALSE	FALSE	FALSE	FALSE	FALSE	FALSE	FALSE	FALSE
orfmeanFEWin34	1343	0.126124	0.00481312	0.108	0.246	0.110614	0.254552	1343	0.126124	0.00481312	0.113	0.268	0.118223	0.27204	0.0109861	MIC not significant	FALSE	FALSE	FALSE	FALSE	FALSE	FALSE	FALSE	FALSE
orfmeanFEWin35	1343	0.119629	0.00303006	0.377	0.487	0.375731	0.502501	1343	0.119629	0.00303006	0.356	0.48	0.364927	0.485154	0.0437039	MIC not significant	FALSE	FALSE	FALSE	FALSE	FALSE	FALSE	FALSE	FALSE
orfmeanFEWin36	1343	0.118113	0.00249171	0.439	0.544	0.441183	0.54209	1343	0.118113	0.00249171	0.443	0.536	0.463246	0.554634	0.0674381	MIC not significant	FALSE	FALSE	FALSE	FALSE	FALSE	FALSE	FALSE	FALSE
orfmeanFEWin37	1343	0.123232	0.00417125	0.205	0.34	0.203882	0.361152	1343	0.123232	0.00417125	0.204	0.354	0.200877	0.363113	0.0179272	MIC not significant	FALSE	FALSE	FALSE	FALSE	FALSE	FALSE	FALSE	FALSE
orfmeanFEWin38	1343	0.121359	0.00449354	0.268	0.473	0.282042	0.481183	1343	0.121359	0.00449354	0.291	0.487	0.296302	0.486032	0.0140077	MIC not significant	FALSE	FALSE	FALSE	FALSE	FALSE	FALSE	FALSE	FALSE
orfmeanFEWin39	1343	0.117666	0.00649558	0.474	0.755	0.488281	0.76752	1343	0.117666	0.00649558	0.46	0.75	0.470024	0.758673	0.00312035	MIC not significant	FALSE	FALSE	FALSE	FALSE	FALSE	FALSE	FALSE	FALSE
orfmeanFEWin40	1343	0.12852	0.00667235	0.054	0.215	0.0535912	0.218268	1343	0.12852	0.00667235	0.075	0.219	0.0618382	0.226817	0.0027381	MIC not significant	FALSE	FALSE	FALSE	FALSE	FALSE	FALSE	FALSE	FALSE
orfmeanFEWin41	1343	0.113736	0.00656219	0.678	0.906	0.680762	0.902148	1343	0.113736	0.00656219	0.652	0.908	0.672983	0.89531	0.00297033	MIC not significant	FALSE	FALSE	FALSE	FALSE	FALSE	FALSE	FALSE	FALSE
orfmeanFEWin42	1343	0.113857	0.00711551	0.648	0.919	0.669553	0.91068	1343	0.113857	0.00711551	0.677	0.905	0.678535	0.908754	0.00197519	MIC not significant	FALSE	FALSE	FALSE	FALSE	FALSE	FALSE	FALSE	FALSE
orfmeanFEWin43	1343	0.115414	0.00739044	0.587	0.9	0.613544	0.886384	1343	0.115414	0.00739044	0.571	0.868	0.588873	0.87416	0.00161403	MIC not significant	FALSE	FALSE	FALSE	FALSE	FALSE	FALSE	FALSE	FALSE
orfmeanFEWin44	1343	0.114897	0.00507735	0.62	0.822	0.629239	0.823352	1343	0.114897	0.00507735	0.636	0.845	0.639222	0.833556	0.00899648	MIC not significant	FALSE	FALSE	FALSE	FALSE	FALSE	FALSE	FALSE	FALSE
orfmeanFEWin45	1343	0.127903	0.00632607	0.062	0.245	0.0654103	0.236822	1343	0.127903	0.00632607	0.074	0.218	0.0730247	0.240329	0.00353777	MIC not significant	FALSE	FALSE	FALSE	FALSE	FALSE	FALSE	FALSE	FALSE
orfmeanFEWin46	1343	0.119067	0.00463308	0.363	0.586	0.369547	0.594036	1343	0.119067	0.00463308	0.389	0.604	0.406065	0.611632	0.0125953	MIC not significant	FALSE	FALSE	FALSE	FALSE	FALSE	FALSE	FALSE	FALSE
orfmeanFEWin47	1343	0.11908	0.00457021	0.405	0.619	0.411821	0.624542	1343	0.11908	0.00457021	0.382	0.592	0.40369	0.613515	0.0132127	MIC not significant	FALSE	FALSE	FALSE	FALSE	FALSE	FALSE	FALSE	FALSE
orfmeanFEWin48	1343	0.122709	0.00388862	0.229	0.36	0.230488	0.378845	1343	0.122709	0.00388862	0.221	0.362	0.219558	0.368705	0.0222919	MIC not significant	FALSE	FALSE	FALSE	FALSE	FALSE	FALSE	FALSE	FALSE
orfmeanFEWin49	1343	0.127564	0.00525146	0.106	0.227	0.105805	0.251299	1343	0.127564	0.00525146	0.091	0.208	0.0819625	0.210294	0.00789063	MIC not significant	FALSE	FALSE	FALSE	FALSE	FALSE	FALSE	FALSE	FALSE
orfmeanFEWin50	1343	0.131556	0.00434439	0.031	0.069	0.0244891	0.0689063	1343	0.131556	0.00434439	0.037	0.075	0.0247055	0.0683719	0.0156984	non-significant monotone/non-monotone	FALSE	FALSE	FALSE	FALSE	FALSE	FALSE	FALSE	FALSE
orfmeanFEWin51	1343	0.129727	0.00553897	0.05	0.142	0.040715	0.139415	1343	0.129727	0.00553897	0.065	0.164	0.0507072	0.155419	0.00635908	MIC not significant	FALSE	FALSE	FALSE	FALSE	FALSE	FALSE	FALSE	FALSE
orfmeanFEWin52	1343	0.12385	0.00600942	0.168	0.396	0.177785	0.421239	1343	0.12385	0.00600942	0.173	0.405	0.168442	0.4176	0.0044758	MIC not significant	FALSE	FALSE	FALSE	FALSE	FALSE	FALSE	FALSE	FALSE
orfmeanFEWin53	1343	0.118758	0.00539858	0.402	0.646	0.408263	0.663378	1343	0.118758	0.00539858	0.388	0.635	0.391881	0.653592	0.00706487	MIC not significant	FALSE	FALSE	FALSE	FALSE	FALSE	FALSE	FALSE	FALSE
orfmeanFEWin54	1343	0.123993	0.00469545	0.163	0.334	0.166827	0.344441	1343	0.123993	0.00469545	0.171	0.347	0.18148	0.354909	0.0120121	MIC not significant	FALSE	FALSE	FALSE	FALSE	FALSE	FALSE	FALSE	FALSE
orfmeanFEWin55	1343	0.125533	0.00510835	0.111	0.264	0.114529	0.279285	1343	0.125533	0.00510835	0.122	0.281	0.134014	0.302007	0.00878856	MIC not significant	FALSE	FALSE	FALSE	FALSE	FALSE	FALSE	FALSE	FALSE
orfmeanFEWin56	1343	0.119879	0.00511632	0.331	0.58	0.347062	0.590288	1343	0.119879	0.00511632	0.36	0.592	0.362543	0.594148	0.00873592	MIC not significant	FALSE	FALSE	FALSE	FALSE	FALSE	FALSE	FALSE	FALSE
orfmeanFEWin57	1343	0.117686	0.00466864	0.443	0.681	0.474626	0.673899	1343	0.117686	0.00466864	0.458	0.655	0.478786	0.686359	0.0122594	MIC not significant	FALSE	FALSE	FALSE	FALSE	FALSE	FALSE	FALSE	FALSE
orfmeanFEWin58	1343	0.12031	0.00333359	0.323	0.439	0.32757	0.468984	1343	0.12031	0.00333359	0.318	0.444	0.321027	0.459374	0.0343713	MIC not significant	FALSE	FALSE	FALSE	FALSE	FALSE	FALSE	FALSE	FALSE
orfmeanFEWin59	1343	0.118186	0.00230214	0.431	0.526	0.454859	0.544335	1343	0.118186	0.00230214	0.441	0.53	0.450459	0.54285	0.0787955	MIC not significant	FALSE	FALSE	FALSE	FALSE	FALSE	FALSE	FALSE	FALSE
orfmeanFEWin60	1343	0.118036	0.00270353	0.423	0.53	0.450321	0.55767	1343	0.118036	0.00270353	0.454	0.561	0.466299	0.5752	0.0567814	MIC not significant	FALSE	FALSE	FALSE	FALSE	FALSE	FALSE	FALSE	FALSE
orfmeanFEWin61	1343	0.127712	0.00449083	0.076	0.17	0.0728348	0.175457	1343	0.127712	0.00449083	0.08	0.168	0.0732537	0.178858	0.0140368	MIC not significant	FALSE	FALSE	FALSE	FALSE	FALSE	FALSE	FALSE	FALSE
orfmeanFEWin62	1343	0.125014	0.00429615	0.151	0.288	0.155371	0.294792	1343	0.125014	0.00429615	0.14	0.278	0.148863	0.29168	0.0162891	MIC not significant	FALSE	FALSE	FALSE	FALSE	FALSE	FALSE	FALSE	FALSE
orfmeanFEWin63	1343	0.125289	0.00381949	0.141	0.263	0.138673	0.252969	1343	0.125289	0.00381949	0.134	0.222	0.125059	0.233346	0.023518	MIC not significant	FALSE	FALSE	FALSE	FALSE	FALSE	FALSE	FALSE	FALSE
orfmeanFEWin64	1343	0.122762	0.00456637	0.243	0.434	0.249181	0.442453	1343	0.122762	0.00456637	0.218	0.389	0.219933	0.404297	0.0132513	MIC not significant	FALSE	FALSE	FALSE	FALSE	FALSE	FALSE	FALSE	FALSE
orfmeanFEWin65	1343	0.124975	0.00656651	0.144	0.402	0.142591	0.408754	1343	0.124975	0.00656651	0.134	0.375	0.139846	0.395486	0.00296084	MIC not significant	FALSE	FALSE	FALSE	FALSE	FALSE	FALSE	FALSE	FALSE
orfmeanFEWin66	1343	0.13033	0.00974265	0.031	0.259	0.0263574	0.268539	1343	0.13033	0.00974265	0.035	0.263	0.0327236	0.279553	0.000291528	non-significant monotone/non-monotone	FALSE	FALSE	FALSE	FALSE	FALSE	FALSE	FALSE	FALSE
orfmeanFEWin67	1343	0.120522	0.00971638	0.307	0.793	0.329495	0.791445	1343	0.120522	0.00971638	0.315	0.797	0.331647	0.78674	0.000297113	MIC not significant	FALSE	FALSE	FALSE	FALSE	FALSE	FALSE	FALSE	FALSE
orfmeanFEWin68	1343	0.125088	0.0080937	0.117	0.443	0.122765	0.453169	1343	0.125088	0.0080937	0.131	0.457	0.141866	0.465518	0.000964892	MIC not significant	FALSE	FALSE	FALSE	FALSE	FALSE	FALSE	FALSE	FALSE
orfmeanFEWin69	1343	0.128465	0.00682409	0.071	0.226	0.054036	0.231256	1343	0.128465	0.00682409	0.061	0.218	0.0504096	0.221712	0.00244802	MIC not significant	FALSE	FALSE	FALSE	FALSE	FALSE	FALSE	FALSE	FALSE
orfmeanFEWin70	1343	0.123887	0.00516489	0.167	0.354	0.168708	0.366639	1343	0.123887	0.00516489	0.178	0.38	0.178705	0.385643	0.00842193	MIC not significant	FALSE	FALSE	FALSE	FALSE	FALSE	FALSE	FALSE	FALSE
orfmeanFEWin71	1343	0.116836	0.00500421	0.509	0.748	0.523622	0.740509	1343	0.116836	0.00500421	0.511	0.738	0.531112	0.751945	0.00950713	MIC not significant	FALSE	FALSE	FALSE	FALSE	FALSE	FALSE	FALSE	FALSE
orfmeanFEWin72	1343	0.122911	0.005059	0.19	0.38	0.196253	0.406367	1343	0.122911	0.005059	0.221	0.421	0.22935	0.437668	0.00912188	MIC not significant	FALSE	FALSE	FALSE	FALSE	FALSE	FALSE	FALSE	FALSE
orfmeanFEWin73	1343	0.13044	0.00471004	0.045	0.108	0.0394094	0.109236	1343	0.13044	0.00471004	0.04	0.101	0.031808	0.098925	0.0118798	non-significant monotone/non-monotone	FALSE	FALSE	FALSE	FALSE	FALSE	FALSE	FALSE	FALSE
orfmeanFEWin74	1343	0.11998	0.00511747	0.349	0.608	0.361093	0.604839	1343	0.11998	0.00511747	0.327	0.561	0.337184	0.572042	0.00872833	MIC not significant	FALSE	FALSE	FALSE	FALSE	FALSE	FALSE	FALSE	FALSE
orfmeanFEWin75	1343	0.120756	0.0074602	0.299	0.662	0.305664	0.667165	1343	0.120756	0.0074602	0.3	0.655	0.311781	0.671259	0.00153353	MIC not significant	FALSE	FALSE	FALSE	FALSE	FALSE	FALSE	FALSE	FALSE
orfmeanFEWin76	1343	0.123995	0.00769937	0.186	0.499	0.179145	0.516724	1343	0.123995	0.00769937	0.172	0.496	0.164375	0.502645	0.00128709	MIC not significant	FALSE	FALSE	FALSE	FALSE	FALSE	FALSE	FALSE	FALSE
orfmeanFEWin77	1343	0.126616	0.00598927	0.114	0.285	0.106931	0.295243	1343	0.126616	0.00598927	0.097	0.264	0.0909929	0.267164	0.00454343	MIC not significant	FALSE	FALSE	FALSE	FALSE	FALSE	FALSE	FALSE	FALSE
orfmeanFEWin78	1343	0.127819	0.00676022	0.089	0.264	0.0767812	0.270146	1343	0.127819	0.00676022	0.081	0.238	0.0681533	0.253911	0.00256611	MIC not significant	FALSE	FALSE	FALSE	FALSE	FALSE	FALSE	FALSE	FALSE
orfmeanFEWin79	1343	0.119701	0.0087097	0.382	0.792	0.394009	0.791414	1343	0.119701	0.0087097	0.35	0.773	0.361909	0.773985	0.000616166	MIC not significant	FALSE	FALSE	FALSE	FALSE	FALSE	FALSE	FALSE	FALSE
orfmeanFEWin80	1343	0.127286	0.00907582	0.086	0.383	0.0804406	0.399773	1343	0.127286	0.00907582	0.092	0.404	0.0909815	0.413921	0.000472373	MIC not significant	FALSE	FALSE	FALSE	FALSE	FALSE	FALSE	FALSE	FALSE
orfmeanFEWin81	1343	0.124583	0.010852	0.134	0.62	0.12874	0.642006	1343	0.124583	0.010852	0.155	0.629	0.154891	0.656602	0.000131055	MIC not significant	FALSE	FALSE	FALSE	FALSE	FALSE	FALSE	FALSE	FALSE
orfmeanFEWin82	1343	0.124495	0.0116909	0.16	0.691	0.156912	0.703514	1343	0.124495	0.0116909	0.164	0.673	0.154583	0.706478	7.1756e-05	MIC not significant	FALSE	FALSE	FALSE	FALSE	FALSE	FALSE	FALSE	FALSE
orfmeanFEWin83	1343	0.132363	0.0128581	0.022	0.32	0.0173795	0.336865	1343	0.132363	0.0128581	0.015	0.306	0.014274	0.327421	3.11224e-05	non-significant monotone/non-monotone	FALSE	FALSE	FALSE	FALSE	FALSE	FALSE	FALSE	FALSE
orfmeanFEWin84	1343	0.138266	0.0102477	0.004	0.072	0.00241442	0.0595435	1343	0.138266	0.0102477	0.005	0.058	0.00160859	0.0522106	0.000202484	non-significant monotone/non-monotone	TRUE	FALSE	FALSE	FALSE	TRUE	TRUE	FALSE	FALSE
orfmeanFEWin85	1343	0.132563	0.00818656	0.017	0.126	0.0162544	0.13982	1343	0.132563	0.00818656	0.02	0.129	0.0142581	0.124921	0.000901706	non-significant monotone/non-monotone	FALSE	FALSE	FALSE	FALSE	FALSE	FALSE	FALSE	FALSE
orfmeanFEWin86	1343	0.12362	0.00531677	0.189	0.41	0.20126	0.421714	1343	0.12362	0.00531677	0.209	0.416	0.201362	0.416297	0.00751255	MIC not significant	FALSE	FALSE	FALSE	FALSE	FALSE	FALSE	FALSE	FALSE
orfmeanFEWin87	1343	0.130939	0.00464342	0.049	0.102	0.0338592	0.0967861	1343	0.130939	0.00464342	0.034	0.095	0.0285542	0.0858267	0.0124967	non-significant monotone/non-monotone	FALSE	FALSE	FALSE	FALSE	FALSE	FALSE	FALSE	FALSE
orfmeanFEWin88	1343	0.134513	0.00558346	0.007	0.039	0.00589991	0.0353078	1343	0.134513	0.00558346	0.014	0.051	0.00904141	0.042033	0.00615073	non-significant monotone/non-monotone	FALSE	FALSE	FALSE	FALSE	TRUE	FALSE	FALSE	FALSE
orfmeanFEWin89	1343	0.13389	0.00550518	0.012	0.057	0.00905435	0.0456341	1343	0.13389	0.00550518	0.016	0.062	0.0137271	0.0557807	0.0065221	non-significant monotone/non-monotone	FALSE	FALSE	FALSE	FALSE	FALSE	FALSE	FALSE	FALSE
orfmeanFEWin90	1343	0.117338	0.00517844	0.49	0.718	0.499448	0.726117	1343	0.117338	0.00517844	0.492	0.735	0.50846	0.731494	0.00833644	MIC not significant	FALSE	FALSE	FALSE	FALSE	FALSE	FALSE	FALSE	FALSE
orfmeanFEWin91	1343	0.116624	0.00520842	0.529	0.757	0.549473	0.773519	1343	0.116624	0.00520842	0.503	0.731	0.526835	0.748282	0.00815036	MIC not significant	FALSE	FALSE	FALSE	FALSE	FALSE	FALSE	FALSE	FALSE
orfmeanFEWin92	1343	0.116779	0.00727673	0.511	0.842	0.522447	0.846264	1343	0.116779	0.00727673	0.551	0.862	0.556927	0.860827	0.00175452	MIC not significant	FALSE	FALSE	FALSE	FALSE	FALSE	FALSE	FALSE	FALSE
orfmeanFEWin93	1343	0.121819	0.00876864	0.257	0.673	0.273272	0.683826	1343	0.121819	0.00876864	0.252	0.665	0.249683	0.677877	0.000590337	MIC not significant	FALSE	FALSE	FALSE	FALSE	FALSE	FALSE	FALSE	FALSE
orfmeanFEWin94	1343	0.123017	0.0111011	0.188	0.717	0.202076	0.723108	1343	0.123017	0.0111011	0.203	0.744	0.211736	0.746761	0.000109571	MIC not significant	FALSE	FALSE	FALSE	FALSE	FALSE	FALSE	FALSE	FALSE
orfmeanFEWin95	1343	0.117034	0.0110888	0.505	0.941	0.518738	0.929217	1343	0.117034	0.0110888	0.496	0.927	0.497904	0.928094	0.000110544	MIC not significant	FALSE	FALSE	FALSE	FALSE	FALSE	FALSE	FALSE	FALSE
orfmeanFEWin96	1343	0.128292	0.0117356	0.064	0.453	0.0552333	0.477985	1343	0.128292	0.0117356	0.067	0.472	0.0584986	0.488139	6.94919e-05	MIC not significant	FALSE	FALSE	FALSE	FALSE	FALSE	FALSE	FALSE	FALSE
orfmeanFEWin97	1343	0.124672	0.0138394	0.177	0.797	0.16193	0.809079	1343	0.124672	0.0138394	0.149	0.754	0.145741	0.767397	1.54488e-05	MIC not significant	FALSE	FALSE	FALSE	FALSE	FALSE	FALSE	FALSE	FALSE
orfmeanFEWin98	1343	0.127741	0.012495	0.073	0.544	0.0659745	0.57513	1343	0.127741	0.012495	0.081	0.548	0.0749138	0.55781	4.03446e-05	MIC not significant	FALSE	FALSE	FALSE	FALSE	FALSE	FALSE	FALSE	FALSE
orfmeanFEWin99	1343	0.129315	0.0136169	0.053	0.519	0.040962	0.531441	1343	0.129315	0.0136169	0.043	0.507	0.0372031	0.521725	1.81047e-05	MIC not significant	FALSE	FALSE	FALSE	FALSE	FALSE	FALSE	FALSE	FALSE
orfmeanFEWin100	1343	0.124291	0.0136668	0.168	0.804	0.160272	0.807563	1343	0.124291	0.0136668	0.16	0.759	0.156106	0.771608	1.74719e-05	MIC not significant	FALSE	FALSE	FALSE	FALSE	FALSE	FALSE	FALSE	FALSE
orftAIWin1	1343	0.132717	0.00129294	0.034	0.044	0.0339612	0.0417944	1343	0.132717	0.00129294	0.038	0.047	0.0315414	0.0386308	0.187862	Non-monotone	FALSE	FALSE	FALSE	FALSE	FALSE	FALSE	FALSE	FALSE
orftAIWin2	1343	0.13902	0.00465357	0.012	0.026	0.00331335	0.0167868	1343	0.13902	0.00465357	0.001	0.018	0.00188165	0.0118237	0.0124006	Non-monotone	FALSE	TRUE	FALSE	FALSE	TRUE	TRUE	FALSE	FALSE
orftAIWin3	1343	0.130027	0.00107139	0.078	0.087	0.0729286	0.081418	1343	0.130027	0.00107139	0.069	0.081	0.0697139	0.0779938	0.230631	MIC not significant	FALSE	FALSE	FALSE	FALSE	FALSE	FALSE	FALSE	FALSE
orftAIWin4	1343	0.127458	0.00220687	0.165	0.222	0.169918	0.235068	1343	0.127458	0.00220687	0.157	0.215	0.160962	0.224918	0.0852645	MIC not significant	FALSE	FALSE	FALSE	FALSE	FALSE	FALSE	FALSE	FALSE
orftAIWin5	1343	0.143107	0.00222553	0.00143421	0.00265789	0.000260449	0.000598768	1343	0.143107	0.00222553	0.001	0.001	0.000152978	0.000416179	0.0839539	Non-monotone	TRUE	TRUE	TRUE	FALSE	TRUE	TRUE	TRUE	FALSE
orftAIWin6	1343	0.124042	0.00103179	0.305	0.321	0.316813	0.334081	1343	0.124042	0.00103179	0.323	0.329	0.336563	0.350916	0.239451	MIC not significant	FALSE	FALSE	FALSE	FALSE	FALSE	FALSE	FALSE	FALSE
orftAIWin7	1343	0.122131	0.00330606	0.427	0.59	0.454247	0.617607	1343	0.122131	0.00330606	0.442	0.59	0.449912	0.610816	0.0351243	MIC not significant	FALSE	FALSE	FALSE	FALSE	FALSE	FALSE	FALSE	FALSE
orftAIWin8	1343	0.128348	0.00239286	0.133	0.191	0.120169	0.178794	1343	0.128348	0.00239286	0.114	0.167	0.124199	0.186769	0.0731234	MIC not significant	FALSE	FALSE	FALSE	FALSE	FALSE	FALSE	FALSE	FALSE
orftAIWin9	1343	0.126925	0.000688468	0.187	0.183	0.194551	0.193158	1343	0.126925	0.000688468	0.157	0.154	0.168509	0.167063	0.336634	MIC not significant	FALSE	FALSE	FALSE	FALSE	FALSE	FALSE	FALSE	FALSE
orftAIWin10	1343	0.123776	0.00645122	0.332	0.694	0.349921	0.700209	1343	0.123776	0.00645122	0.319	0.674	0.338446	0.688862	0.00322448	MIC not significant	FALSE	FALSE	FALSE	FALSE	FALSE	FALSE	FALSE	FALSE
orftAIWin11	1343	0.129713	0.00225171	0.097	0.146	0.0989087	0.143111	1343	0.129713	0.00225171	0.088	0.125	0.0865518	0.130896	0.0821511	MIC not significant	FALSE	FALSE	FALSE	FALSE	FALSE	FALSE	FALSE	FALSE
orftAIWin12	1343	0.126415	0.00133701	0.198	0.226	0.196349	0.224169	1343	0.126415	0.00133701	0.185	0.2	0.185049	0.209423	0.180506	MIC not significant	FALSE	FALSE	FALSE	FALSE	FALSE	FALSE	FALSE	FALSE
orftAIWin13	1343	0.118084	0.00730756	0.668	0.945	0.693715	0.934614	1343	0.118084	0.00730756	0.667	0.948	0.680115	0.935654	0.00171524	MIC not significant	FALSE	FALSE	FALSE	FALSE	FALSE	FALSE	FALSE	FALSE
orftAIWin14	1343	0.14036	0.00369232	0.002	0.008	0.000833825	0.00364853	1343	0.14036	0.00369232	0.001	0.004	0.00105004	0.00437393	0.0259595	Non-monotone	TRUE	TRUE	FALSE	FALSE	TRUE	TRUE	FALSE	FALSE
orftAIWin15	1343	0.127761	0.0011066	0.142	0.161	0.139581	0.152445	1343	0.127761	0.0011066	0.153	0.169	0.158186	0.173514	0.223115	MIC not significant	FALSE	FALSE	FALSE	FALSE	FALSE	FALSE	FALSE	FALSE
orftAIWin16	1343	0.134022	0.0114306	0.025	0.325	0.0179403	0.353107	1343	0.134022	0.0114306	0.031	0.336	0.0175426	0.355299	8.64875e-05	non-significant monotone/non-monotone	FALSE	FALSE	FALSE	FALSE	FALSE	FALSE	FALSE	FALSE
orftAIWin17	1343	0.119686	0.00329411	0.581	0.739	0.606002	0.74876	1343	0.119686	0.00329411	0.603	0.767	0.621354	0.767541	0.0354567	MIC not significant	FALSE	FALSE	FALSE	FALSE	FALSE	FALSE	FALSE	FALSE
orftAIWin18	1343	0.123597	0.00110192	0.352	0.374	0.35348	0.374796	1343	0.123597	0.00110192	0.343	0.372	0.378707	0.398842	0.224097	MIC not significant	FALSE	FALSE	FALSE	FALSE	FALSE	FALSE	FALSE	FALSE
orftAIWin19	1343	0.124337	0.0141546	0.296	0.965	0.304906	0.949986	1343	0.124337	0.0141546	0.323	0.968	0.322015	0.953331	1.23408e-05	MIC not significant	FALSE	FALSE	FALSE	FALSE	FALSE	FALSE	FALSE	FALSE
orftAIWin20	1343	0.126473	0.00358896	0.208	0.353	0.221469	0.372941	1343	0.126473	0.00358896	0.209	0.328	0.197926	0.343395	0.0281369	MIC not significant	FALSE	FALSE	FALSE	FALSE	FALSE	FALSE	FALSE	FALSE
orftAIWin21	1343	0.114955	0.00147656	0.856	0.892	0.852488	0.879907	1343	0.114955	0.00147656	0.859	0.888	0.844115	0.871372	0.159307	MIC not significant	FALSE	FALSE	FALSE	FALSE	FALSE	FALSE	FALSE	FALSE
orftAIWin22	1343	0.127937	0.0149517	0.127	0.894	0.133155	0.884283	1343	0.127937	0.0149517	0.143	0.898	0.141682	0.882618	6.99675e-06	MIC not significant	FALSE	FALSE	FALSE	FALSE	FALSE	FALSE	FALSE	FALSE
orftAIWin23	1343	0.120809	0.00301102	0.492	0.642	0.523026	0.661761	1343	0.120809	0.00301102	0.527	0.658	0.536293	0.676968	0.0443718	MIC not significant	FALSE	FALSE	FALSE	FALSE	FALSE	FALSE	FALSE	FALSE
orftAIWin24	1343	0.117891	0.000808329	0.659	0.669	0.693444	0.701253	1343	0.117891	0.000808329	0.71	0.705	0.717206	0.716122	0.297804	MIC not significant	FALSE	FALSE	FALSE	FALSE	FALSE	FALSE	FALSE	FALSE
orftAIWin25	1343	0.136096	0.0214765	0.028	0.853	0.0133363	0.8391	1343	0.136096	0.0214765	0.021	0.828	0.00846342	0.822696	6.86317e-08	non-significant monotone/non-monotone	FALSE	FALSE	FALSE	FALSE	FALSE	FALSE	FALSE	FALSE
orftAIWin26	1343	0.125495	0.00241023	0.236	0.326	0.258175	0.348393	1343	0.125495	0.00241023	0.241	0.322	0.239584	0.325449	0.0720884	MIC not significant	FALSE	FALSE	FALSE	FALSE	FALSE	FALSE	FALSE	FALSE
orftAIWin27	1343	0.115811	0.000772644	0.797	0.804	0.79679	0.800329	1343	0.115811	0.000772644	0.811	0.82	0.820062	0.821755	0.308723	MIC not significant	FALSE	FALSE	FALSE	FALSE	FALSE	FALSE	FALSE	FALSE
orftAIWin28	1343	0.123541	0.0167644	0.338	0.996	0.355478	0.985442	1343	0.123541	0.0167644	0.343	0.99	0.362087	0.985326	1.93031e-06	MIC not significant	FALSE	FALSE	FALSE	FALSE	FALSE	FALSE	FALSE	FALSE
orftAIWin29	1343	0.134336	0.0037413	0.03	0.065	0.0191546	0.0559041	1343	0.134336	0.0037413	0.022	0.051	0.0155227	0.0479402	0.0249895	non-significant monotone/non-monotone	FALSE	FALSE	FALSE	FALSE	FALSE	FALSE	FALSE	FALSE
orftAIWin30	1343	0.118688	0.00109643	0.662	0.681	0.673145	0.694032	1343	0.118688	0.00109643	0.614	0.647	0.645871	0.668034	0.225257	MIC not significant	FALSE	FALSE	FALSE	FALSE	FALSE	FALSE	FALSE	FALSE
orftAIWin31	1343	0.124931	0.0186	0.288	0.994	0.297618	0.987335	1343	0.124931	0.0186	0.276	0.997	0.284955	0.988878	5.25448e-07	MIC not significant	FALSE	FALSE	FALSE	FALSE	FALSE	FALSE	FALSE	FALSE
orftAIWin32	1343	0.129163	0.00432252	0.112	0.24	0.107751	0.252018	1343	0.129163	0.00432252	0.124	0.248	0.115524	0.265057	0.0159635	MIC not significant	FALSE	FALSE	FALSE	FALSE	FALSE	FALSE	FALSE	FALSE
orftAIWin33	1343	0.12703	0.000294497	0.18	0.171	0.186615	0.167029	1343	0.12703	0.000294497	0.186	0.168	0.190041	0.17115	0.529771	MIC not significant	FALSE	FALSE	FALSE	FALSE	FALSE	FALSE	FALSE	FALSE
orftAIWin34	1343	0.131764	0.0150217	0.055	0.726	0.0437626	0.723789	1343	0.131764	0.0150217	0.055	0.732	0.0471652	0.73393	6.65694e-06	MIC not significant	FALSE	FALSE	FALSE	FALSE	FALSE	FALSE	FALSE	FALSE
orftAIWin35	1343	0.116861	0.00333132	0.752	0.87	0.757008	0.865985	1343	0.116861	0.00333132	0.762	0.887	0.761966	0.871689	0.0344326	MIC not significant	FALSE	FALSE	FALSE	FALSE	FALSE	FALSE	FALSE	FALSE
orftAIWin36	1343	0.113808	6.70464e-06	0.879	0.851	0.879537	0.855756	1343	0.113808	6.70464e-06	0.882	0.838	0.87027	0.842469	0.924471	MIC not significant	FALSE	FALSE	FALSE	FALSE	FALSE	FALSE	FALSE	FALSE
orftAIWin37	1343	0.130301	0.0126871	0.069	0.667	0.0576426	0.663145	1343	0.130301	0.0126871	0.075	0.645	0.0668299	0.665247	3.5168e-05	MIC not significant	FALSE	FALSE	FALSE	FALSE	FALSE	FALSE	FALSE	FALSE
orftAIWin38	1343	0.123143	0.00570522	0.376	0.695	0.40332	0.704635	1343	0.123143	0.00570522	0.344	0.674	0.366333	0.682848	0.00561544	MIC not significant	FALSE	FALSE	FALSE	FALSE	FALSE	FALSE	FALSE	FALSE
orftAIWin39	1343	0.121496	0.000266281	0.458	0.428	0.491185	0.464002	1343	0.121496	0.000266281	0.47	0.453	0.493759	0.46163	0.550179	MIC not significant	FALSE	FALSE	FALSE	FALSE	FALSE	FALSE	FALSE	FALSE
orftAIWin40	1343	0.131902	0.0160755	0.064	0.769	0.0474913	0.774371	1343	0.131902	0.0160755	0.057	0.754	0.0473433	0.758113	3.14776e-06	MIC not significant	FALSE	FALSE	FALSE	FALSE	FALSE	FALSE	FALSE	FALSE
orftAIWin41	1343	0.118772	0.00343124	0.666	0.816	0.667545	0.805448	1343	0.118772	0.00343124	0.636	0.804	0.655763	0.79996	0.0318326	MIC not significant	FALSE	FALSE	FALSE	FALSE	FALSE	FALSE	FALSE	FALSE
orftAIWin42	1343	0.116681	0.000408578	0.743	0.73	0.764548	0.74931	1343	0.116681	0.000408578	0.782	0.765	0.788147	0.771611	0.459214	MIC not significant	FALSE	FALSE	FALSE	FALSE	FALSE	FALSE	FALSE	FALSE
orftAIWin43	1343	0.145426	0.017819	0.000539474	0.129855	5.86641e-05	0.129084	1343	0.145426	0.017819	0.000631579	0.131368	5.97451e-05	0.130142	9.13738e-07	non-significant monotone/non-monotone	TRUE	TRUE	FALSE	FALSE	TRUE	TRUE	FALSE	FALSE
orftAIWin44	1343	0.125545	0.00446531	0.233	0.44	0.250895	0.468502	1343	0.125545	0.00446531	0.232	0.421	0.243789	0.460262	0.0143127	MIC not significant	FALSE	FALSE	FALSE	FALSE	FALSE	FALSE	FALSE	FALSE
orftAIWin45	1343	0.120244	0.000990746	0.547	0.565	0.557591	0.57488	1343	0.120244	0.000990746	0.51	0.519	0.546592	0.56219	0.249027	MIC not significant	FALSE	FALSE	FALSE	FALSE	FALSE	FALSE	FALSE	FALSE
orftAIWin46	1343	0.131941	0.0185141	0.052	0.882	0.0376413	0.879158	1343	0.131941	0.0185141	0.054	0.905	0.0401148	0.887238	5.58413e-07	MIC not significant	FALSE	FALSE	FALSE	FALSE	FALSE	FALSE	FALSE	FALSE
orftAIWin47	1343	0.125343	0.00460073	0.231	0.454	0.245042	0.465445	1343	0.125343	0.00460073	0.236	0.453	0.247992	0.483116	0.0129092	MIC not significant	FALSE	FALSE	FALSE	FALSE	FALSE	FALSE	FALSE	FALSE
orftAIWin48	1343	0.113544	0.000800825	0.89	0.885	0.888606	0.889611	1343	0.113544	0.000800825	0.889	0.898	0.889914	0.892559	0.300058	MIC not significant	FALSE	FALSE	FALSE	FALSE	FALSE	FALSE	FALSE	FALSE
orftAIWin49	1343	0.139455	0.0167848	0.003	0.316	0.00113685	0.341606	1343	0.139455	0.0167848	0.003	0.337	0.00125679	0.360392	1.90253e-06	non-significant monotone/non-monotone	TRUE	TRUE	FALSE	FALSE	TRUE	TRUE	FALSE	FALSE
orftAIWin50	1343	0.114343	0.00474922	0.88	0.968	0.868239	0.959852	1343	0.114343	0.00474922	0.89	0.973	0.867553	0.962652	0.0115316	MIC not significant	FALSE	FALSE	FALSE	FALSE	FALSE	FALSE	FALSE	FALSE
orftAIWin51	1343	0.126849	0.000636688	0.173	0.168	0.183285	0.176432	1343	0.126849	0.000636688	0.181	0.177	0.182142	0.17541	0.355493	MIC not significant	FALSE	FALSE	FALSE	FALSE	FALSE	FALSE	FALSE	FALSE
orftAIWin52	1343	0.135059	0.0258458	0.034	0.979	0.0176484	0.96303	1343	0.135059	0.0258458	0.022	0.977	0.0161202	0.963684	3.12895e-09	Monotone	FALSE	FALSE	FALSE	FALSE	FALSE	FALSE	FALSE	FALSE
orftAIWin53	1343	0.11812	0.00322738	0.672	0.824	0.690959	0.817346	1343	0.11812	0.00322738	0.672	0.809	0.680873	0.8093	0.0373738	MIC not significant	FALSE	FALSE	FALSE	FALSE	FALSE	FALSE	FALSE	FALSE
orftAIWin54	1343	0.124699	0.000238126	0.246	0.23	0.267235	0.2444	1343	0.124699	0.000238126	0.282	0.26	0.29689	0.267796	0.572061	MIC not significant	FALSE	FALSE	FALSE	FALSE	FALSE	FALSE	FALSE	FALSE
orftAIWin55	1343	0.1279	0.0241793	0.134	1	0.128883	0.996386	1343	0.1279	0.0241793	0.149	0.998	0.150389	0.995883	1.01588e-08	MIC not significant	FALSE	FALSE	FALSE	FALSE	FALSE	FALSE	FALSE	FALSE
orftAIWin56	1343	0.123648	0.00407543	0.342	0.542	0.362862	0.56395	1343	0.123648	0.00407543	0.321	0.533	0.348341	0.554832	0.0192983	MIC not significant	FALSE	FALSE	FALSE	FALSE	FALSE	FALSE	FALSE	FALSE
orftAIWin57	1343	0.112306	0.000158996	0.925	0.912	0.927056	0.91166	1343	0.112306	0.000158996	0.951	0.939	0.932746	0.920291	0.644309	MIC not significant	FALSE	FALSE	FALSE	FALSE	FALSE	FALSE	FALSE	FALSE
orftAIWin58	1343	0.142692	0.0248446	0.001	0.638	0.000276174	0.652456	1343	0.142692	0.0248446	0.001	0.645	0.000343332	0.667167	6.34837e-09	non-significant monotone/non-monotone	TRUE	TRUE	FALSE	FALSE	TRUE	TRUE	FALSE	FALSE
orftAIWin59	1343	0.123076	0.00256713	0.36	0.49	0.386386	0.499996	1343	0.123076	0.00256713	0.365	0.483	0.380815	0.496736	0.063418	MIC not significant	FALSE	FALSE	FALSE	FALSE	FALSE	FALSE	FALSE	FALSE
orftAIWin60	1343	0.117091	0.000210322	0.725	0.698	0.730901	0.708163	1343	0.117091	0.000210322	0.749	0.718	0.761605	0.733229	0.595416	MIC not significant	FALSE	FALSE	FALSE	FALSE	FALSE	FALSE	FALSE	FALSE
orftAIWin61	1343	0.132824	0.020016	0.042	0.905	0.0320706	0.897339	1343	0.132824	0.020016	0.053	0.899	0.0408352	0.886095	1.92832e-07	MIC not significant	FALSE	FALSE	FALSE	FALSE	FALSE	FALSE	FALSE	FALSE
orftAIWin62	1343	0.120594	0.00194535	0.517	0.606	0.550722	0.622643	1343	0.120594	0.00194535	0.541	0.615	0.568374	0.643407	0.106173	MIC not significant	FALSE	FALSE	FALSE	FALSE	FALSE	FALSE	FALSE	FALSE
orftAIWin63	1343	0.115316	0.00010187	0.83	0.787	0.822658	0.791277	1343	0.115316	0.00010187	0.835	0.806	0.81791	0.792484	0.711721	MIC not significant	FALSE	FALSE	FALSE	FALSE	FALSE	FALSE	FALSE	FALSE
orftAIWin64	1343	0.132904	0.0188847	0.042	0.848	0.0347885	0.844896	1343	0.132904	0.0188847	0.031	0.848	0.0268837	0.857043	4.29485e-07	non-significant monotone/non-monotone	FALSE	FALSE	FALSE	FALSE	FALSE	FALSE	FALSE	FALSE
orftAIWin65	1343	0.129917	0.00116125	0.089	0.099	0.0788559	0.0904645	1343	0.129917	0.00116125	0.086	0.087	0.0823346	0.0923982	0.212022	MIC not significant	FALSE	FALSE	FALSE	FALSE	FALSE	FALSE	FALSE	FALSE
orftAIWin66	1343	0.121316	0.00012753	0.479	0.437	0.498074	0.460253	1343	0.121316	0.00012753	0.472	0.431	0.479224	0.439036	0.679256	MIC not significant	FALSE	FALSE	FALSE	FALSE	FALSE	FALSE	FALSE	FALSE
orftAIWin67	1343	0.132593	0.0187675	0.033	0.859	0.0284893	0.854762	1343	0.132593	0.0187675	0.042	0.848	0.0313173	0.860283	4.66672e-07	non-significant monotone/non-monotone	FALSE	FALSE	FALSE	FALSE	FALSE	FALSE	FALSE	FALSE
orftAIWin68	1343	0.121626	0.00275818	0.462	0.605	0.48755	0.615431	1343	0.121626	0.00275818	0.446	0.569	0.462064	0.588886	0.0543327	MIC not significant	FALSE	FALSE	FALSE	FALSE	FALSE	FALSE	FALSE	FALSE
orftAIWin69	1343	0.118846	0.000437206	0.631	0.606	0.653568	0.638706	1343	0.118846	0.000437206	0.64	0.618	0.654694	0.634202	0.443891	MIC not significant	FALSE	FALSE	FALSE	FALSE	FALSE	FALSE	FALSE	FALSE
orftAIWin70	1343	0.135385	0.0230815	0.016	0.912	0.0112097	0.904721	1343	0.135385	0.0230815	0.012	0.928	0.00772894	0.912126	2.20691e-08	non-significant monotone/non-monotone	FALSE	FALSE	FALSE	FALSE	FALSE	FALSE	FALSE	FALSE
orftAIWin71	1343	0.120279	0.000670035	0.541	0.536	0.568525	0.564353	1343	0.120279	0.000670035	0.533	0.538	0.575383	0.57181	0.343189	MIC not significant	FALSE	FALSE	FALSE	FALSE	FALSE	FALSE	FALSE	FALSE
orftAIWin72	1343	0.118657	6.68554e-05	0.632	0.594	0.66024	0.621518	1343	0.118657	6.68554e-05	0.665	0.61	0.669138	0.626413	0.764657	MIC not significant	FALSE	FALSE	FALSE	FALSE	FALSE	FALSE	FALSE	FALSE
orftAIWin73	1343	0.134602	0.0204641	0.018	0.853	0.017023	0.86019	1343	0.134602	0.0204641	0.019	0.861	0.0143402	0.850628	1.40439e-07	non-significant monotone/non-monotone	FALSE	FALSE	FALSE	FALSE	FALSE	FALSE	FALSE	FALSE
orftAIWin74	1343	0.118888	0.000547027	0.645	0.635	0.653055	0.641499	1343	0.118888	0.000547027	0.661	0.656	0.6729	0.663296	0.391706	MIC not significant	FALSE	FALSE	FALSE	FALSE	FALSE	FALSE	FALSE	FALSE
orftAIWin75	1343	0.122337	0.000344598	0.389	0.368	0.427163	0.400437	1343	0.122337	0.000344598	0.415	0.382	0.418238	0.391589	0.496636	MIC not significant	FALSE	FALSE	FALSE	FALSE	FALSE	FALSE	FALSE	FALSE
orftAIWin76	1343	0.143885	0.0217209	0.001	0.419	0.000130147	0.423915	1343	0.143885	0.0217209	0.001	0.392	0.00018667	0.410059	5.77407e-08	non-significant monotone/non-monotone	TRUE	TRUE	FALSE	FALSE	TRUE	TRUE	FALSE	FALSE
orftAIWin77	1343	0.120729	0.00111589	0.503	0.525	0.52088	0.53939	1343	0.120729	0.00111589	0.491	0.508	0.52245	0.548358	0.221151	MIC not significant	FALSE	FALSE	FALSE	FALSE	FALSE	FALSE	FALSE	FALSE
orftAIWin78	1343	0.128927	0.00103399	0.119	0.133	0.117156	0.126794	1343	0.128927	0.00103399	0.119	0.124	0.113554	0.118834	0.238949	MIC not significant	FALSE	FALSE	FALSE	FALSE	FALSE	FALSE	FALSE	FALSE
orftAIWin79	1343	0.138468	0.0235341	0.006	0.794	0.00249914	0.800647	1343	0.138468	0.0235341	0.006	0.795	0.00406825	0.802938	1.60269e-08	non-significant monotone/non-monotone	TRUE	FALSE	FALSE	FALSE	TRUE	TRUE	FALSE	FALSE
orftAIWin80	1343	0.120862	0.000893158	0.504	0.516	0.53345	0.54348	1343	0.120862	0.000893158	0.51	0.528	0.534101	0.544272	0.273721	MIC not significant	FALSE	FALSE	FALSE	FALSE	FALSE	FALSE	FALSE	FALSE
orftAIWin81	1343	0.143967	0.00137962	0.001	0.002	0.000228023	0.000322365	1343	0.143967	0.00137962	0.001	0.001	0.000103497	0.000160964	0.173686	Non-monotone	TRUE	TRUE	TRUE	FALSE	TRUE	TRUE	TRUE	FALSE
orftAIWin82	1343	0.134194	0.0186641	0.023	0.768	0.018402	0.774676	1343	0.134194	0.0186641	0.021	0.773	0.017994	0.785345	5.02104e-07	non-significant monotone/non-monotone	FALSE	FALSE	FALSE	FALSE	FALSE	FALSE	FALSE	FALSE
orftAIWin83	1343	0.112181	0.000495064	0.94	0.938	0.929606	0.925939	1343	0.112181	0.000495064	0.929	0.929	0.918288	0.915229	0.415174	MIC not significant	FALSE	FALSE	FALSE	FALSE	FALSE	FALSE	FALSE	FALSE
orftAIWin84	1343	0.144131	0.00142808	0.001	0	8.0587e-05	0.000111888	1343	0.144131	0.00142808	0.001	0.002	0.00014139	0.000225989	0.166311	Non-monotone	TRUE	TRUE	FALSE	FALSE	TRUE	TRUE	TRUE	FALSE
orftAIWin85	1343	0.141601	0.0145275	0.003	0.149	0.000813175	0.158798	1343	0.141601	0.0145275	0.005	0.154	0.00118405	0.168687	9.60753e-06	non-significant monotone/non-monotone	TRUE	FALSE	FALSE	FALSE	TRUE	TRUE	FALSE	FALSE
orftAIWin86	1343	0.12262	0.00105928	0.416	0.427	0.429216	0.445877	1343	0.12262	0.00105928	0.374	0.39	0.403916	0.42461	0.233253	MIC not significant	FALSE	FALSE	FALSE	FALSE	FALSE	FALSE	FALSE	FALSE
orftAIWin87	1343	0.123713	0.0016906	0.324	0.356	0.333171	0.391272	1343	0.123713	0.0016906	0.333	0.393	0.356004	0.413966	0.132043	MIC not significant	FALSE	FALSE	FALSE	FALSE	FALSE	FALSE	FALSE	FALSE
orftAIWin88	1343	0.153049	0.0133065	2.63158e-05	0.00365789	2.0808e-07	0.00109008	1343	0.153049	0.0133065	1.31579e-05	0.00346053	1.87157e-07	0.00104949	2.28809e-05	Non-monotone	TRUE	TRUE	FALSE	FALSE	TRUE	TRUE	TRUE	FALSE
orftAIWin89	1343	0.122323	0.00157343	0.414	0.469	0.430318	0.485963	1343	0.122323	0.00157343	0.403	0.463	0.428421	0.480468	0.146242	MIC not significant	FALSE	FALSE	FALSE	FALSE	FALSE	FALSE	FALSE	FALSE
orftAIWin90	1343	0.120201	0.000493837	0.518	0.51	0.55789	0.538943	1343	0.120201	0.000493837	0.566	0.552	0.569203	0.55136	0.415753	MIC not significant	FALSE	FALSE	FALSE	FALSE	FALSE	FALSE	FALSE	FALSE
orftAIWin91	1343	0.136423	0.0102263	0.012	0.177	0.0069697	0.173914	1343	0.136423	0.0102263	0.013	0.176	0.00821875	0.184848	0.00020709	non-significant monotone/non-monotone	FALSE	FALSE	FALSE	FALSE	TRUE	FALSE	FALSE	FALSE
orftAIWin92	1343	0.122869	0.00241954	0.399	0.513	0.41877	0.518611	1343	0.122869	0.00241954	0.403	0.506	0.415483	0.51692	0.0715402	MIC not significant	FALSE	FALSE	FALSE	FALSE	FALSE	FALSE	FALSE	FALSE
orftAIWin93	1343	0.124386	9.39667e-05	0.276	0.245	0.29652	0.264663	1343	0.124386	9.39667e-05	0.295	0.268	0.300128	0.268315	0.722615	MIC not significant	FALSE	FALSE	FALSE	FALSE	FALSE	FALSE	FALSE	FALSE
orftAIWin94	1343	0.132589	0.0113425	0.038	0.434	0.0339307	0.448593	1343	0.132589	0.0113425	0.041	0.429	0.0322222	0.447466	9.29532e-05	non-significant monotone/non-monotone	FALSE	FALSE	FALSE	FALSE	FALSE	FALSE	FALSE	FALSE
orftAIWin95	1343	0.135661	0.00303886	0.025	0.037	0.0135468	0.0319413	1343	0.135661	0.00303886	0.023	0.037	0.0103903	0.0261015	0.0434093	Non-monotone	FALSE	FALSE	FALSE	FALSE	FALSE	FALSE	FALSE	FALSE
orftAIWin96	1343	0.132472	5.43822e-05	0.053	0.042	0.0436119	0.0341351	1343	0.132472	5.43822e-05	0.045	0.037	0.0363256	0.0277197	0.787131	MIC not significant	FALSE	FALSE	FALSE	FALSE	FALSE	FALSE	FALSE	FALSE
orftAIWin97	1343	0.139019	0.011964	0.012	0.146	0.00250452	0.157426	1343	0.139019	0.011964	0.003	0.152	0.00181739	0.142217	5.95918e-05	non-significant monotone/non-monotone	FALSE	TRUE	FALSE	FALSE	TRUE	TRUE	FALSE	FALSE
orftAIWin98	1343	0.123968	0.00310198	0.313	0.431	0.324314	0.464182	1343	0.123968	0.00310198	0.299	0.433	0.305862	0.451587	0.041286	MIC not significant	FALSE	FALSE	FALSE	FALSE	FALSE	FALSE	FALSE	FALSE
orftAIWin99	1343	0.117991	2.74205e-05	0.678	0.632	0.698391	0.661467	1343	0.117991	2.74205e-05	0.678	0.629	0.690389	0.645758	0.847939	MIC not significant	FALSE	FALSE	FALSE	FALSE	FALSE	FALSE	FALSE	FALSE
orftAIWin100	1343	0.128306	0.0102757	0.118	0.626	0.119885	0.65515	1343	0.128306	0.0102757	0.127	0.67	0.135728	0.676586	0.000199862	MIC not significant	FALSE	FALSE	FALSE	FALSE	FALSE	FALSE	FALSE	FALSE
codonTTT	1343	0.205023	0.10869	0	0.99998	2.14301e-41	0.999744	1333	0.201521	0.105836	0	1	7.25645e-37	0.999882	3.11011e-34	Monotone	TRUE	TRUE	FALSE	TRUE	TRUE	TRUE	FALSE	TRUE
codonTTC	1343	0.134868	0.0056681	0.014	0.057	0.00654373	0.0431702	1328	0.135061	0.00579396	0.021	0.081	0.0129385	0.0705837	0.00551527	non-significant monotone/non-monotone	FALSE	FALSE	FALSE	FALSE	TRUE	FALSE	FALSE	FALSE
codonTTA	1343	0.188097	0.138061	0	1	1.94095e-27	1	1340	0.189049	0.139367	0	1	4.92147e-28	1	1.43862e-45	Monotone	TRUE	TRUE	FALSE	TRUE	TRUE	TRUE	FALSE	TRUE
codonTTG	1343	0.29584	0.297734	0	1	9.73924e-168	1	1283	0.256155	0.241863	0	1	7.84885e-95	1	4.30186e-79	Monotone	TRUE	TRUE	FALSE	TRUE	TRUE	TRUE	FALSE	TRUE
codonTCT	1343	0.228664	0.181155	0	1	1.76364e-63	1	1217	0.197992	0.108697	0	1	9.17187e-28	0.999999	3.01296e-32	Monotone	TRUE	TRUE	FALSE	TRUE	TRUE	TRUE	FALSE	TRUE
codonTCC	1343	0.189829	0.114512	0	1	4.51239e-28	1	1299	0.190431	0.124072	0	1	4.13766e-27	1	3.0698e-39	Monotone	TRUE	TRUE	FALSE	TRUE	TRUE	TRUE	FALSE	TRUE
codonTCA	1343	0.258222	0.188751	0	1	3.49089e-96	1	1059	0.195547	0.0882091	0	0.998693	2.41923e-19	0.995401	5.21842e-23	Monotone	TRUE	TRUE	FALSE	TRUE	TRUE	TRUE	FALSE	TRUE
codonTCG	1343	0.149313	0.0565365	5.26316e-05	0.999987	1.23623e-06	0.999945	1317	0.152517	0.0560994	5.94059e-05	1	7.03239e-07	0.999827	2.99615e-18	Monotone	TRUE	TRUE	FALSE	TRUE	TRUE	TRUE	FALSE	TRUE
codonTAT	1343	0.149687	0.0442425	3.94737e-05	0.988408	9.77513e-07	0.979504	1323	0.158367	0.0477847	0	0.941307	2.60319e-09	0.930108	8.91294e-16	non-significant monotone/non-monotone	TRUE	TRUE	FALSE	FALSE	TRUE	TRUE	FALSE	FALSE
codonTAC	1343	0.227425	0.219636	0	1	4.12128e-60	1	1121	0.210698	0.157453	0	1	3.82709e-32	1	1.40223e-43	Monotone	TRUE	TRUE	FALSE	TRUE	TRUE	TRUE	FALSE	TRUE
codonTAA	1343	0.248895	0.232457	0	1	8.52311e-85	1	1124	0.18287	0.12593	0	1	8.76951e-16	1	1.07525e-34	Monotone	TRUE	TRUE	FALSE	TRUE	TRUE	TRUE	FALSE	TRUE
codonTAG	1343	0.226272	0.182057	0	1	1.28913e-60	1	1195	0.183836	0.102184	0	1	2.16716e-17	1	8.54904e-30	Monotone	TRUE	TRUE	FALSE	TRUE	TRUE	TRUE	FALSE	TRUE
codonTGT	1343	0.343984	0.341544	0	1	3.64593e-259	1	1158	0.272952	0.223964	0	1	3.57635e-96	1	1.11105e-65	Monotone	TRUE	TRUE	FALSE	TRUE	TRUE	TRUE	FALSE	TRUE
codonTGC	1343	0.19271	0.118992	0	1	9.10975e-31	1	1312	0.202687	0.127868	0	1	2.6627e-35	1	7.39506e-41	Monotone	TRUE	TRUE	FALSE	TRUE	TRUE	TRUE	FALSE	TRUE
codonTGA	1343	0.137325	0.00913967	0.003	0.067	0.00176302	0.0539344	1343	0.137325	0.00913967	0.01	0.059	0.00237763	0.0605427	0.000451005	non-significant monotone/non-monotone	TRUE	FALSE	FALSE	FALSE	TRUE	TRUE	FALSE	FALSE
codonTGG	1343	0.138217	0.0161775	0.007	0.248	0.00124276	0.26606	1323	0.136109	0.0197241	0.018	0.683	0.00931356	0.693505	2.91394e-07	non-significant monotone/non-monotone	FALSE	FALSE	FALSE	FALSE	TRUE	FALSE	FALSE	FALSE
codonCTT	1343	0.144916	0.00962657	0.000328947	0.00917105	3.1207e-05	0.00431847	1335	0.147171	0.00992362	0.00025	0.00619737	9.35612e-06	0.00217362	0.000266929	Non-monotone	TRUE	TRUE	FALSE	FALSE	TRUE	TRUE	TRUE	FALSE
codonCTC	1343	0.137845	0.0204201	0.003	0.465	0.00193434	0.496373	1207	0.149216	0.034876	0.001	0.87	9.85521e-05	0.877657	6.19407e-11	non-significant monotone/non-monotone	TRUE	TRUE	FALSE	FALSE	TRUE	TRUE	FALSE	FALSE
codonCTA	1343	0.261166	0.219175	0	1	1.23846e-103	1	1160	0.198022	0.121592	0	1	6.25947e-25	1	1.67945e-34	Monotone	TRUE	TRUE	FALSE	TRUE	TRUE	TRUE	FALSE	TRUE
codonCTG	1343	0.162846	0.0645177	0	0.999683	7.47048e-12	0.998189	1231	0.147022	0.0421069	0.00101316	0.995895	0.000115943	0.990412	3.60202e-13	Monotone	TRUE	TRUE	FALSE	TRUE	TRUE	TRUE	FALSE	TRUE
codonCCT	1343	0.217334	0.12262	0	1	1.30114e-52	0.999861	1319	0.221228	0.127662	0	1	1.43005e-53	0.999975	5.34295e-41	Monotone	TRUE	TRUE	FALSE	TRUE	TRUE	TRUE	FALSE	TRUE
codonCCC	1343	0.227935	0.154611	0	1	6.80998e-59	1	1047	0.180434	0.0672141	0	0.984307	1.01084e-11	0.974301	1.52774e-17	Monotone	TRUE	TRUE	FALSE	TRUE	TRUE	TRUE	FALSE	TRUE
codonCCA	1343	0.248161	0.202272	0	1	2.57377e-78	1	896	0.181794	0.0924395	0	1	1.6859e-08	1	1.2852e-20	Monotone	TRUE	TRUE	FALSE	TRUE	TRUE	TRUE	FALSE	TRUE
codonCCG	1343	0.152789	0.04163	9.90099e-06	0.838386	8.60564e-08	0.836541	1256	0.13828	0.0193505	0.02	0.645	0.00986306	0.670137	7.45559e-07	non-significant monotone/non-monotone	TRUE	FALSE	FALSE	FALSE	TRUE	FALSE	FALSE	FALSE
codonCAT	1343	0.250386	0.202746	0	1	7.06064e-78	1	501	0.198021	0.0878594	0.00413861	1	0.000946341	0.999943	1.2812e-11	Monotone	TRUE	FALSE	FALSE	FALSE	TRUE	TRUE	FALSE	TRUE
codonCAC	1343	0.18826	0.0978532	0	1	1.0542e-23	0.999884	710	0.156749	0.00780054	0.122	0.254	0.114563	0.280638	0.018581	MIC not significant	TRUE	FALSE	FALSE	FALSE	TRUE	FALSE	FALSE	FALSE
codonCAA	1343	0.229361	0.145066	0	1	4.34917e-57	0.999991	394	0.204127	0.0203885	0.041	0.27	0.0330024	0.274479	0.00451381	non-significant monotone/non-monotone	TRUE	FALSE	FALSE	FALSE	TRUE	FALSE	FALSE	FALSE
codonCAG	1343	0.148243	0.0264656	0.000131579	0.2425	3.23331e-06	0.253728	1176	0.160863	0.0614415	1.31579e-05	0.999934	6.09984e-08	0.999467	6.34071e-18	Monotone	TRUE	TRUE	FALSE	TRUE	TRUE	TRUE	FALSE	TRUE
codonCGT	1343	0.147067	0.0367662	0.000171053	0.868618	6.78333e-06	0.863608	1247	0.144765	0.0165957	0.002	0.2	0.000986312	0.202543	5.0278e-06	non-significant monotone/non-monotone	TRUE	TRUE	FALSE	FALSE	TRUE	TRUE	FALSE	FALSE
codonCGC	1343	0.219413	0.136509	0	1	2.409e-48	0.999999	893	0.14841	0.0304175	0.073	0.984	0.0630046	0.970158	1.56496e-07	MIC not significant	TRUE	FALSE	FALSE	FALSE	TRUE	FALSE	FALSE	FALSE
codonCGA	1343	0.25137	0.179537	0	1	3.66113e-89	1	1140	0.180692	0.070756	0	0.993743	5.6116e-14	0.986482	6.45438e-20	Monotone	TRUE	TRUE	FALSE	TRUE	TRUE	TRUE	FALSE	TRUE
codonCGG	1343	0.221889	0.141381	0	1	5.53855e-55	1	1174	0.16529	0.0725355	0	1	2.08589e-09	0.99999	5.87119e-21	Monotone	TRUE	TRUE	FALSE	TRUE	TRUE	TRUE	FALSE	TRUE
codonATT	1343	0.138116	0.0479999	0.003	1	0.00149888	0.999998	1338	0.138698	0.0509044	0.00511881	1	0.00172702	1	6.64914e-17	Monotone	TRUE	FALSE	FALSE	FALSE	TRUE	TRUE	FALSE	TRUE
codonATC	1343	0.133252	0.0264595	0.022	0.971	0.0145241	0.964307	1318	0.139933	0.0313614	0.003	0.973	0.00125829	0.964712	9.52443e-11	Monotone	FALSE	TRUE	FALSE	FALSE	FALSE	TRUE	FALSE	FALSE
codonATA	1343	0.215238	0.130642	0	1	8.84534e-51	1	1261	0.173167	0.0710893	0	0.999782	2.80241e-14	0.99837	5.76967e-22	Monotone	TRUE	TRUE	FALSE	TRUE	TRUE	TRUE	FALSE	TRUE
codonATG	1343	0.144497	0.0499142	0.000394737	1	3.90995e-05	0.999913	1329	0.14424	0.0443427	0.000960526	0.999816	0.000111091	0.998904	8.72439e-15	Monotone	TRUE	TRUE	FALSE	TRUE	TRUE	TRUE	FALSE	TRUE
codonACT	1343	0.175041	0.0712776	0	0.992178	2.27816e-18	0.984552	1245	0.134537	0.0218147	0.039	0.893	0.0262484	0.880046	1.65025e-07	non-significant monotone/non-monotone	TRUE	FALSE	FALSE	FALSE	TRUE	FALSE	FALSE	FALSE
codonACC	1343	0.237461	0.189312	0	1	1.61321e-76	1	1313	0.248789	0.205016	0	1	5.9574e-85	1	2.34809e-67	Monotone	TRUE	TRUE	FALSE	TRUE	TRUE	TRUE	FALSE	TRUE
codonACA	1343	0.193899	0.1221	0	1	1.1915e-29	1	1074	0.144074	0.0309136	0.016	0.958	0.0100027	0.944843	6.60834e-09	Monotone	TRUE	FALSE	FALSE	FALSE	TRUE	FALSE	FALSE	FALSE
codonACG	1343	0.316993	0.313252	0	1	2.36702e-212	1	1330	0.321922	0.31632	0	1	1.3266e-217	1	8.54893e-112	Monotone	TRUE	TRUE	FALSE	TRUE	TRUE	TRUE	FALSE	TRUE
codonAAT	1343	0.252684	0.227681	0	1	3.78831e-92	1	1144	0.214242	0.131222	0	1	5.01206e-34	1	8.48242e-37	Monotone	TRUE	TRUE	FALSE	TRUE	TRUE	TRUE	FALSE	TRUE
codonAAC	1343	0.154089	0.0450451	0	0.912743	2.96933e-08	0.901423	1230	0.137295	0.011126	0.019	0.213	0.0112539	0.220572	0.000210644	non-significant monotone/non-monotone	TRUE	FALSE	FALSE	FALSE	TRUE	FALSE	FALSE	FALSE
codonAAA	1343	0.211606	0.109193	0	0.993099	1.0655e-43	0.985235	1061	0.167139	0.0371805	3.94737e-05	0.319303	9.39555e-08	0.337389	2.4056e-10	non-significant monotone/non-monotone	TRUE	TRUE	FALSE	FALSE	TRUE	TRUE	FALSE	FALSE
codonAAG	1343	0.287146	0.3008	0	1	5.41675e-154	1	1334	0.287919	0.301506	0	1	1.13737e-151	1	6.48257e-106	Monotone	TRUE	TRUE	FALSE	TRUE	TRUE	TRUE	FALSE	TRUE
codonAGT	1343	0.248792	0.216184	0	1	3.35701e-85	1	1166	0.185749	0.120014	0	1	2.58557e-18	1	3.24768e-34	Monotone	TRUE	TRUE	FALSE	TRUE	TRUE	TRUE	FALSE	TRUE
codonAGC	1343	0.249358	0.200221	0	1	6.52799e-90	1	1286	0.249352	0.219404	0	1	1.14838e-83	1	4.10537e-71	Monotone	TRUE	TRUE	FALSE	TRUE	TRUE	TRUE	FALSE	TRUE
codonAGA	1343	0.191363	0.0804386	0	0.843069	1.12909e-28	0.840297	1191	0.153565	0.0252884	0.001	0.282	2.39104e-05	0.292544	3.44032e-08	non-significant monotone/non-monotone	TRUE	TRUE	FALSE	FALSE	TRUE	TRUE	FALSE	FALSE
codonAGG	1343	0.233654	0.203777	0	1	8.06576e-72	1	1328	0.230036	0.20662	0	1	2.19434e-64	1	1.09114e-68	Monotone	TRUE	TRUE	FALSE	TRUE	TRUE	TRUE	FALSE	TRUE
codonGTT	1343	0.163236	0.0410502	0	0.210515	6.90879e-11	0.214835	676	0.148336	0.0262717	0.318	0.988	0.34485	0.976195	2.2911e-05	MIC not significant	TRUE	FALSE	FALSE	FALSE	TRUE	FALSE	FALSE	FALSE
codonGTC	1343	0.146942	0.0784492	0.000184211	1	6.9985e-06	1	1304	0.146777	0.0757288	0.000168317	1	1.22135e-05	1	4.32878e-24	Monotone	TRUE	TRUE	FALSE	TRUE	TRUE	TRUE	FALSE	TRUE
codonGTA	1343	0.129717	0.00267418	0.02	0.031	0.0107478	0.0208207	302	0.171734	0.000110061	0.823	0.757	0.818685	0.768576	0.855926	MIC not significant	FALSE	FALSE	FALSE	FALSE	FALSE	FALSE	FALSE	FALSE
codonGTG	1343	0.173138	0.104142	0	1	2.31564e-17	1	1244	0.153923	0.0662793	7.92079e-05	1	6.04552e-07	0.999999	2.78006e-20	Monotone	TRUE	TRUE	FALSE	TRUE	TRUE	TRUE	FALSE	TRUE
codonGCT	1343	0.244409	0.215661	0	1	5.28298e-83	1	1218	0.215971	0.164119	0	1	6.46701e-42	1	2.59307e-49	Monotone	TRUE	TRUE	FALSE	TRUE	TRUE	TRUE	FALSE	TRUE
codonGCC	1343	0.169097	0.0616255	0	0.958743	4.32847e-15	0.946824	1302	0.172596	0.0688047	0	0.993881	2.3672e-16	0.986956	6.28313e-22	Monotone	TRUE	TRUE	FALSE	TRUE	TRUE	TRUE	FALSE	TRUE
codonGCA	1343	0.246835	0.190481	0	1	1.31955e-80	1	1065	0.1817	0.0945108	0	1	2.57431e-13	1	9.56012e-25	Monotone	TRUE	TRUE	FALSE	TRUE	TRUE	TRUE	FALSE	TRUE
codonGCG	1343	0.157053	0.0500701	0	0.970911	1.67418e-09	0.958998	1328	0.156727	0.0493387	0	0.977752	8.27901e-09	0.967272	2.62425e-16	Monotone	TRUE	TRUE	FALSE	TRUE	TRUE	TRUE	FALSE	FALSE
codonGAT	1343	0.122229	0.0166707	0.156	0.911	0.167327	0.899916	365	0.170504	0.0178933	0.687	0.963	0.706157	0.937242	0.0105176	MIC not significant	FALSE	FALSE	FALSE	FALSE	FALSE	FALSE	FALSE	FALSE
codonGAC	1343	0.167208	0.0549463	0	0.728347	5.59034e-13	0.73833	868	0.158617	0.0129907	0.008	0.079	0.00286752	0.0791041	0.000767939	non-significant monotone/non-monotone	TRUE	FALSE	FALSE	FALSE	TRUE	TRUE	FALSE	FALSE
codonGAA	1343	0.122068	0.00108685	0.291	0.302	0.305793	0.32538	1206	0.121511	8.02949e-05	0.61	0.558	0.619799	0.578661	0.755901	MIC not significant	FALSE	FALSE	FALSE	FALSE	FALSE	FALSE	FALSE	FALSE
codonGAG	1343	0.110597	5.1921e-05	0.886	0.864	0.873723	0.851404	1115	0.128626	0.00334063	0.329	0.431	0.3552	0.481535	0.0536782	MIC not significant	FALSE	FALSE	FALSE	FALSE	FALSE	FALSE	FALSE	FALSE
codonGGT	1343	0.153361	0.0204374	0	0.0175842	4.22738e-08	0.0106047	1308	0.145091	0.0117677	0.001	0.051	0.000236388	0.0333429	8.45436e-05	non-significant monotone/non-monotone	TRUE	TRUE	FALSE	FALSE	TRUE	TRUE	FALSE	FALSE
codonGGC	1343	0.172046	0.0772692	0	0.99999	1.18447e-16	0.999834	1311	0.177413	0.0882	0	1	8.9572e-18	0.999999	4.1838e-28	Monotone	TRUE	TRUE	FALSE	TRUE	TRUE	TRUE	FALSE	TRUE
codonGGA	1343	0.210925	0.161548	0	1	4.40607e-47	1	1338	0.212483	0.159512	0	1	1.10761e-47	1	2.10296e-52	Monotone	TRUE	TRUE	FALSE	TRUE	TRUE	TRUE	FALSE	TRUE
codonGGG	1343	0.196923	0.102846	0	1	4.63904e-34	0.999903	1288	0.181855	0.085576	0	0.99999	7.61695e-21	0.999808	7.86056e-27	Monotone	TRUE	TRUE	FALSE	TRUE	TRUE	TRUE	FALSE	TRUE
pcodonTTTTTT	1343	0.150971	0.0413298	1.31579e-05	0.767658	4.30014e-07	0.772151	403	0.171996	0.000757469	0.544	0.501	0.568195	0.522359	0.581708	MIC not significant	TRUE	FALSE	FALSE	FALSE	TRUE	FALSE	FALSE	FALSE
pcodonTTTTTC	1343	0.114444	0.010331	0.416	0.884	0.422971	0.891168	277	0.19597	0.000338907	0.36	0.289	0.392582	0.322978	0.76034	MIC not significant	FALSE	FALSE	FALSE	FALSE	FALSE	FALSE	FALSE	FALSE
pcodonTTTTTA	1343	0.120469	0.00778449	0.223	0.574	0.214079	0.58288	364	0.210797	2.05669e-05	0.041	0.026	0.0296575	0.0202461	0.931286	MIC not significant	FALSE	FALSE	FALSE	FALSE	FALSE	FALSE	FALSE	FALSE
pcodonTTTTTG	1343	0.145286	0.0401592	0.000118421	0.906474	1.06142e-05	0.899963	349	0.171553	0.00967796	0.61	0.775	0.643451	0.790338	0.0664037	MIC not significant	TRUE	FALSE	FALSE	FALSE	TRUE	FALSE	FALSE	FALSE
pcodonTTTTCT	1343	0.121768	0.0177741	0.096	0.843	0.0908685	0.849778	226	0.170177	4.56556e-05	0.926	0.875	0.907599	0.864816	0.919538	MIC not significant	FALSE	FALSE	FALSE	FALSE	FALSE	FALSE	FALSE	FALSE
pcodonTTTTCC	1343	0.106618	0.000674092	0.656	0.653	0.669848	0.667024	149	0.224792	0.00299332	0.654	0.604	0.669853	0.621651	0.507518	MIC not significant	FALSE	FALSE	FALSE	FALSE	FALSE	FALSE	FALSE	FALSE
pcodonTTTTCA	1343	0.115935	0.0174993	0.086	0.864	0.0839544	0.864616	96	0.239359	0.0126502	0.528	0.565	0.5567	0.587582	0.275256	MIC not significant	FALSE	FALSE	FALSE	FALSE	FALSE	FALSE	FALSE	FALSE
pcodonTTTTCG	1343	0.12054	0.00427932	0.145	0.24	0.141962	0.280149	235	0.196889	0.000381819	0.662	0.583	0.672283	0.597652	0.765721	MIC not significant	FALSE	FALSE	FALSE	FALSE	FALSE	FALSE	FALSE	FALSE
pcodonTTTTAT	1343	0.132988	0.0228452	0.007	0.648	0.00272284	0.652239	286	0.178107	0.000122122	0.639	0.568	0.667702	0.602099	0.852386	MIC not significant	FALSE	FALSE	FALSE	FALSE	TRUE	FALSE	FALSE	FALSE
pcodonTTTTAC	1343	0.124659	0.0216196	0.003	0.649	0.00333363	0.671615	105	0.244439	0.000720957	0.578	0.488	0.627614	0.531435	0.785704	MIC not significant	TRUE	FALSE	FALSE	FALSE	TRUE	FALSE	FALSE	FALSE
pcodonTTTTAA	1343	0.116736	0.0199801	0.117	0.954	0.116712	0.949644	141	0.233055	0.00738016	0.355	0.355	0.395693	0.400285	0.311111	MIC not significant	FALSE	FALSE	FALSE	FALSE	FALSE	FALSE	FALSE	FALSE
pcodonTTTTAG	1343	0.132925	0.0245843	0.001	0.524	0.000635241	0.544926	158	0.237386	0.0015785	0.314	0.243	0.341748	0.27241	0.620153	MIC not significant	TRUE	FALSE	FALSE	FALSE	TRUE	FALSE	FALSE	FALSE
pcodonTTTTGT	1343	0.139303	0.0313213	0.000302632	0.639566	4.30801e-05	0.651133	202	0.215283	0.000523222	0.513	0.44	0.540512	0.465793	0.7466	MIC not significant	TRUE	FALSE	FALSE	FALSE	TRUE	FALSE	FALSE	FALSE
pcodonTTTTGC	1343	0.119542	0.00022338	0.133	0.115	0.127963	0.113205	218	0.221172	0.000664484	0.166	0.143	0.174401	0.133911	0.705077	MIC not significant	FALSE	FALSE	FALSE	FALSE	FALSE	FALSE	FALSE	FALSE
pcodonTTTTGA	1343	0.119559	0.00693622	0.164	0.434	0.167722	0.45988	232	0.243121	0.000572972	0.047	0.04	0.0422268	0.0256643	0.716846	MIC not significant	FALSE	FALSE	FALSE	FALSE	FALSE	FALSE	FALSE	FALSE
pcodonTTTTGG	1343	0.125809	0.00379122	0.097	0.171	0.0786263	0.156432	351	0.16981	0.000535319	0.654	0.601	0.679541	0.626919	0.665754	MIC not significant	FALSE	FALSE	FALSE	FALSE	FALSE	FALSE	FALSE	FALSE
pcodonTTTCTT	1343	0.12601	0.00799883	0.055	0.229	0.0421674	0.230186	284	0.180035	0.00931047	0.639	0.759	0.648797	0.759942	0.104652	MIC not significant	FALSE	FALSE	FALSE	FALSE	FALSE	FALSE	FALSE	FALSE
pcodonTTTCTC	1343	0.103393	0.00325358	0.653	0.756	0.654721	0.784492	92	0.200732	0.000684502	0.93	0.866	0.912256	0.86263	0.804477	MIC not significant	FALSE	FALSE	FALSE	FALSE	FALSE	FALSE	FALSE	FALSE
pcodonTTTCTA	1343	0.120834	0.0160848	0.05	0.658	0.037042	0.665962	133	0.22768	0.000488201	0.538	0.445	0.569747	0.477579	0.800701	MIC not significant	FALSE	FALSE	FALSE	FALSE	FALSE	FALSE	FALSE	FALSE
pcodonTTTCTG	1343	0.120702	0.00438478	0.046	0.111	0.0430443	0.115875	144	0.268578	0.00123879	0.047	0.031	0.0376343	0.0259434	0.675358	Non-monotone	FALSE	FALSE	FALSE	FALSE	FALSE	FALSE	FALSE	FALSE
pcodonTTTCCT	1343	0.115527	4.13388e-05	0.322	0.286	0.34421	0.307018	235	0.258967	0.00271333	0.013	0.01	0.00324235	0.00290048	0.42673	MIC not significant	FALSE	FALSE	FALSE	FALSE	FALSE	TRUE	FALSE	FALSE
pcodonTTTCCC	1343	0.117761	0.00486654	0.022	0.09	0.0176289	0.0776064	64	0.338348	0.0158778	0.145	0.152	0.148366	0.153145	0.320282	MIC not significant	FALSE	FALSE	FALSE	FALSE	FALSE	FALSE	FALSE	FALSE
pcodonTTTCCA	1343	0.126725	0.0162888	0.002	0.145	0.00017343	0.151871	64	0.383155	0.00863095	0.035	0.027	0.0228292	0.0157247	0.464342	Non-monotone	TRUE	FALSE	FALSE	FALSE	TRUE	FALSE	FALSE	FALSE
pcodonTTTCCG	1343	0.105192	0.00412809	0.739	0.878	0.748962	0.881344	160	0.247113	0.00227476	0.168	0.12	0.16485	0.122061	0.549237	MIC not significant	FALSE	FALSE	FALSE	FALSE	FALSE	FALSE	FALSE	FALSE
pcodonTTTCAG	1343	0.110587	0.000637453	0.189	0.192	0.195393	0.189191	67	0.286547	0.0125624	0.398	0.38	0.441963	0.418123	0.366517	MIC not significant	FALSE	FALSE	FALSE	FALSE	FALSE	FALSE	FALSE	FALSE
pcodonTTTCGT	1343	0.123267	0.00853447	0.06	0.322	0.0618497	0.331894	234	0.214084	0.00566895	0.336	0.354	0.362653	0.382872	0.251293	MIC not significant	FALSE	FALSE	FALSE	FALSE	FALSE	FALSE	FALSE	FALSE
pcodonTTTCGC	1343	0.113176	0.00760365	0.08	0.36	0.0703595	0.403854	50	0.298954	0.00461052	0.453	0.341	0.50257	0.391432	0.639407	MIC not significant	FALSE	FALSE	FALSE	FALSE	FALSE	FALSE	FALSE	FALSE
pcodonTTTCGA	1343	0.121693	0.00816753	0.058	0.257	0.0488075	0.271767	163	0.230319	0.000940367	0.288	0.222	0.315932	0.237517	0.697581	MIC not significant	FALSE	FALSE	FALSE	FALSE	FALSE	FALSE	FALSE	FALSE
pcodonTTTCGG	1343	0.117123	0.00976213	0.146	0.546	0.137754	0.571498	153	0.225144	0.0110882	0.526	0.604	0.574301	0.638302	0.195175	MIC not significant	FALSE	FALSE	FALSE	FALSE	FALSE	FALSE	FALSE	FALSE
pcodonTTTATT	1343	0.11473	0.00578643	0.576	0.82	0.59452	0.826295	494	0.163161	0.000599422	0.389	0.345	0.412008	0.367602	0.587222	MIC not significant	FALSE	FALSE	FALSE	FALSE	FALSE	FALSE	FALSE	FALSE
pcodonTTTATC	1343	0.105345	0.00148372	0.825	0.856	0.822744	0.851254	223	0.235329	0.00344099	0.06	0.055	0.0460421	0.0410231	0.383313	MIC not significant	FALSE	FALSE	FALSE	FALSE	FALSE	FALSE	FALSE	FALSE
pcodonTTTATA	1343	0.12697	0.0228016	0.044	0.904	0.0350402	0.88077	276	0.18753	5.66134e-05	0.58	0.495	0.599972	0.519867	0.90097	MIC not significant	FALSE	FALSE	FALSE	FALSE	FALSE	FALSE	FALSE	FALSE
pcodonTTTATG	1343	0.121589	0.00910038	0.192	0.608	0.204865	0.619906	386	0.174823	0.000101874	0.398	0.329	0.441226	0.368654	0.843309	MIC not significant	FALSE	FALSE	FALSE	FALSE	FALSE	FALSE	FALSE	FALSE
pcodonTTTACT	1343	0.106019	0.00640632	0.695	0.916	0.708547	0.912717	148	0.27946	0.000846288	0.07	0.05	0.063123	0.0400237	0.725602	MIC not significant	FALSE	FALSE	FALSE	FALSE	FALSE	FALSE	FALSE	FALSE
pcodonTTTACC	1343	0.122716	0.000557879	0.039	0.034	0.0290043	0.0265828	148	0.277114	0.072274	0.095	0.816	0.0838718	0.814354	0.000953606	MIC not significant	FALSE	FALSE	FALSE	FALSE	FALSE	FALSE	FALSE	FALSE
pcodonTTTACA	1343	0.100278	0.00359493	0.778	0.906	0.791321	0.900844	65	0.309467	1.19226e-05	0.285	0.189	0.31094	0.193974	0.978222	MIC not significant	FALSE	FALSE	FALSE	FALSE	FALSE	FALSE	FALSE	FALSE
pcodonTTTACG	1343	0.113404	0.00189807	0.479	0.534	0.485148	0.550234	260	0.219722	0.00895589	0.158	0.235	0.178071	0.259891	0.128005	MIC not significant	FALSE	FALSE	FALSE	FALSE	FALSE	FALSE	FALSE	FALSE
pcodonTTTAAT	1343	0.12001	0.00787558	0.028	0.172	0.0216108	0.169167	90	0.298326	0.0015912	0.129	0.094	0.133439	0.0885779	0.708935	MIC not significant	FALSE	FALSE	FALSE	FALSE	FALSE	FALSE	FALSE	FALSE
pcodonTTTAAC	1343	0.111091	0.00266069	0.223	0.31	0.212795	0.302307	79	0.188634	0.00597745	0.957	0.93	0.927873	0.905886	0.498252	MIC not significant	FALSE	FALSE	FALSE	FALSE	FALSE	FALSE	FALSE	FALSE
pcodonTTTAAA	1343	0.123087	0.00943757	0.007	0.082	0.00192612	0.0686691	69	0.247041	0.00107408	0.729	0.598	0.744202	0.63702	0.788784	MIC not significant	FALSE	FALSE	FALSE	FALSE	TRUE	FALSE	FALSE	FALSE
pcodonTTTAAG	1343	0.106106	0.000700617	0.83	0.828	0.835012	0.835395	255	0.184532	0.00427169	0.648	0.66	0.677845	0.684566	0.298493	MIC not significant	FALSE	FALSE	FALSE	FALSE	FALSE	FALSE	FALSE	FALSE
pcodonTTTAGT	1343	0.11092	0.0151375	0.307	0.97	0.339507	0.955039	124	0.215068	0.0223979	0.882	0.96	0.866986	0.940394	0.097113	MIC not significant	FALSE	FALSE	FALSE	FALSE	FALSE	FALSE	FALSE	FALSE
pcodonTTTAGC	1343	0.1031	0.000275227	0.823	0.803	0.821199	0.802509	149	0.278103	0.0126279	0.07	0.09	0.0596271	0.0827856	0.172419	MIC not significant	FALSE	FALSE	FALSE	FALSE	FALSE	FALSE	FALSE	FALSE
pcodonTTTAGA	1343	0.116002	0.00394383	0.181	0.294	0.177051	0.318053	158	0.195287	0.00353052	0.911	0.883	0.898081	0.879556	0.45833	MIC not significant	FALSE	FALSE	FALSE	FALSE	FALSE	FALSE	FALSE	FALSE
pcodonTTTAGG	1343	0.121788	1.91586e-05	0.143	0.12	0.15497	0.131381	334	0.17024	0.0112506	0.82	0.938	0.80941	0.915675	0.0527849	MIC not significant	FALSE	FALSE	FALSE	FALSE	FALSE	FALSE	FALSE	FALSE
pcodonTTTGTT	1343	0.115114	0.00023373	0.037	0.029	0.0290993	0.0205111	40	0.290624	0.0271095	0.379	0.389	0.415316	0.429484	0.30998	MIC not significant	FALSE	FALSE	FALSE	FALSE	FALSE	FALSE	FALSE	FALSE
pcodonTTTGTC	1343	0.121378	0.000206724	0.108	0.101	0.109984	0.0966865	238	0.184911	0.0423788	0.813513	0.999579	0.813464	0.997169	0.00140597	MIC not significant	FALSE	FALSE	FALSE	FALSE	FALSE	FALSE	FALSE	FALSE
pcodonTTTGTG	1343	0.141251	0.0129841	0.000210526	0.0148816	2.68682e-05	0.0100379	238	0.193931	0.0124408	0.663	0.803	0.68522	0.806965	0.0859737	MIC not significant	TRUE	FALSE	FALSE	FALSE	TRUE	FALSE	FALSE	FALSE
pcodonTTTGCT	1343	0.13466	0.00844102	0.00110526	0.0167237	0.000431554	0.0120649	193	0.222919	0.00830828	0.237	0.28	0.255179	0.309226	0.207419	MIC not significant	TRUE	FALSE	FALSE	FALSE	TRUE	FALSE	FALSE	FALSE
pcodonTTTGCC	1343	0.116327	0.00250838	0.164	0.234	0.156987	0.225227	153	0.226252	0.000828987	0.556	0.47	0.584522	0.50439	0.72387	MIC not significant	FALSE	FALSE	FALSE	FALSE	FALSE	FALSE	FALSE	FALSE
pcodonTTTGCA	1343	0.130604	0.0179967	0.000657895	0.147355	0.000127783	0.146363	94	0.256532	0.0444779	0.395	0.734	0.421284	0.759879	0.0413123	MIC not significant	TRUE	FALSE	FALSE	FALSE	TRUE	FALSE	FALSE	FALSE
pcodonTTTGCG	1343	0.12323	0.000759633	0.092	0.093	0.0865703	0.0872048	272	0.238582	0.0149567	0.013	0.041	0.00647651	0.0302529	0.0438769	MIC not significant	FALSE	FALSE	FALSE	FALSE	FALSE	FALSE	FALSE	FALSE
pcodonTTTGAA	1343	0.107875	7.37416e-05	0.547	0.515	0.566827	0.531547	146	0.203021	0.00212394	0.673	0.601	0.704694	0.636407	0.580695	MIC not significant	FALSE	FALSE	FALSE	FALSE	FALSE	FALSE	FALSE	FALSE
pcodonTTTGAG	1343	0.105098	0.00190439	0.551	0.628	0.555572	0.624862	90	0.265682	0.0150045	0.363	0.418	0.415976	0.456003	0.250076	MIC not significant	FALSE	FALSE	FALSE	FALSE	FALSE	FALSE	FALSE	FALSE
pcodonTTTGGT	1343	0.122214	0.00675765	0.137	0.439	0.155121	0.439214	332	0.155645	0.0098895	0.983	0.996	0.959039	0.984981	0.0703508	MIC not significant	FALSE	FALSE	FALSE	FALSE	FALSE	FALSE	FALSE	FALSE
pcodonTTTGGC	1343	0.113174	0.00100004	0.428	0.452	0.450538	0.46745	248	0.198085	0.00611252	0.424	0.481	0.472767	0.515588	0.219868	MIC not significant	FALSE	FALSE	FALSE	FALSE	FALSE	FALSE	FALSE	FALSE
pcodonTTTGGA	1343	0.106882	0.00347891	0.878	0.938	0.865217	0.931833	368	0.176821	0.014896	0.499	0.818	0.533149	0.820671	0.0191752	MIC not significant	FALSE	FALSE	FALSE	FALSE	FALSE	FALSE	FALSE	FALSE
pcodonTTTGGG	1343	0.134678	0.0159141	0.006	0.203	0.00130942	0.211479	297	0.208277	0.00751925	0.179	0.237	0.184248	0.252888	0.135987	MIC not significant	TRUE	FALSE	FALSE	FALSE	TRUE	FALSE	FALSE	FALSE
pcodonTTCTTT	1343	0.11806	0.00352514	0.283	0.438	0.301814	0.443292	305	0.222737	0.00282682	0.04	0.037	0.0245138	0.0226029	0.354769	MIC not significant	FALSE	FALSE	FALSE	FALSE	FALSE	FALSE	FALSE	FALSE
pcodonTTCTTC	1343	0.130744	3.19037e-05	0.007	0.005	0.00557656	0.00419422	243	0.201169	0.0175651	0.445	0.715	0.477638	0.728981	0.0389749	MIC not significant	FALSE	FALSE	FALSE	FALSE	TRUE	FALSE	FALSE	FALSE
pcodonTTCTTA	1343	0.12425	0.00471063	0.09	0.175	0.0750434	0.184015	284	0.15167	0.0202633	0.987	0.999	0.977271	0.998568	0.0163697	MIC not significant	FALSE	FALSE	FALSE	FALSE	FALSE	FALSE	FALSE	FALSE
pcodonTTCTTG	1343	0.137684	0.0254715	0.001	0.496	0.000223894	0.511666	266	0.211916	0.00407951	0.232	0.226	0.232912	0.233074	0.299336	MIC not significant	TRUE	FALSE	FALSE	FALSE	TRUE	FALSE	FALSE	FALSE
pcodonTTCTCT	1343	0.112137	0.00628585	0.292	0.567	0.285502	0.590013	121	0.209098	0.00958189	0.712	0.754	0.738493	0.749329	0.285453	MIC not significant	FALSE	FALSE	FALSE	FALSE	FALSE	FALSE	FALSE	FALSE
pcodonTTCTCC	1343	0.115972	0.00734303	0.123	0.413	0.11136	0.410572	119	0.264705	0.0175046	0.147	0.205	0.15187	0.227125	0.151471	MIC not significant	FALSE	FALSE	FALSE	FALSE	FALSE	FALSE	FALSE	FALSE
pcodonTTCTCA	1343	0.109935	0.0032847	0.197	0.335	0.205734	0.346851	56	0.231576	0.00049349	0.798	0.658	0.790182	0.673263	0.870675	MIC not significant	FALSE	FALSE	FALSE	FALSE	FALSE	FALSE	FALSE	FALSE
pcodonTTCTCG	1343	0.111104	0.000114106	0.399	0.37	0.427367	0.394686	163	0.199136	0.00517386	0.79	0.781	0.80141	0.792578	0.361532	MIC not significant	FALSE	FALSE	FALSE	FALSE	FALSE	FALSE	FALSE	FALSE
pcodonTTCTAT	1343	0.119163	0.00195177	0.132	0.17	0.126161	0.163948	192	0.207991	0.000824528	0.491	0.405	0.533117	0.461958	0.692574	MIC not significant	FALSE	FALSE	FALSE	FALSE	FALSE	FALSE	FALSE	FALSE
pcodonTTCTAC	1343	0.120604	0.0127136	0.012	0.28	0.00820211	0.300557	77	0.278822	0.0117552	0.214	0.196	0.238568	0.219981	0.347934	MIC not significant	FALSE	FALSE	FALSE	FALSE	FALSE	FALSE	FALSE	FALSE
pcodonTTCTAA	1343	0.103123	0.000333766	0.627	0.596	0.638317	0.611975	70	0.257664	0.0343573	0.58	0.773	0.618567	0.782992	0.124481	MIC not significant	FALSE	FALSE	FALSE	FALSE	FALSE	FALSE	FALSE	FALSE
pcodonTTCTAG	1343	0.108083	0.00670497	0.447	0.784	0.471822	0.791784	119	0.219264	0.000319898	0.632	0.525	0.668546	0.568626	0.846907	MIC not significant	FALSE	FALSE	FALSE	FALSE	FALSE	FALSE	FALSE	FALSE
pcodonTTCTGT	1343	0.113856	0.00992726	0.153	0.593	0.151806	0.618472	93	0.204772	0.00114819	0.93	0.87	0.898213	0.850974	0.747114	MIC not significant	FALSE	FALSE	FALSE	FALSE	FALSE	FALSE	FALSE	FALSE
pcodonTTCTGC	1343	0.115112	0.000777029	0.257	0.258	0.258658	0.25925	166	0.246226	0.0202835	0.121	0.242	0.114873	0.26348	0.0671856	MIC not significant	FALSE	FALSE	FALSE	FALSE	FALSE	FALSE	FALSE	FALSE
pcodonTTCTGA	1343	0.104684	3.63306e-07	0.724	0.685	0.72309	0.686129	141	0.199009	0.000796887	0.823	0.757	0.820689	0.755775	0.739674	MIC not significant	FALSE	FALSE	FALSE	FALSE	FALSE	FALSE	FALSE	FALSE
pcodonTTCTGG	1343	0.110695	0.000229869	0.621	0.597	0.638553	0.61247	249	0.219689	0.00311925	0.113	0.102	0.109147	0.100976	0.380187	MIC not significant	FALSE	FALSE	FALSE	FALSE	FALSE	FALSE	FALSE	FALSE
pcodonTTCCTT	1343	0.121553	0.00468775	0.093	0.218	0.0876275	0.213059	215	0.228739	0.0362101	0.147	0.64	0.154569	0.655798	0.00511734	MIC not significant	FALSE	FALSE	FALSE	FALSE	FALSE	FALSE	FALSE	FALSE
pcodonTTCCTC	1343	0.115151	0.00063568	0.056	0.052	0.0484985	0.0464439	64	0.3083	0.0655366	0.301	0.752	0.348276	0.75149	0.0411708	MIC not significant	FALSE	FALSE	FALSE	FALSE	FALSE	FALSE	FALSE	FALSE
pcodonTTCCTA	1343	0.106322	0.00970865	0.482	0.929	0.511975	0.911137	91	0.242984	0.0312513	0.597	0.809	0.632143	0.806513	0.0936803	MIC not significant	FALSE	FALSE	FALSE	FALSE	FALSE	FALSE	FALSE	FALSE
pcodonTTCCTG	1343	0.117882	0.00645087	0.042	0.201	0.040391	0.196482	103	0.25329	0.00587357	0.545	0.506	0.562341	0.523248	0.44163	MIC not significant	FALSE	FALSE	FALSE	FALSE	FALSE	FALSE	FALSE	FALSE
pcodonTTCCCT	1343	0.133887	0.0218121	0.001	0.293	0.000217477	0.303966	148	0.236109	0.106857	0.473026	0.999987	0.508123	0.999835	5.01266e-05	MIC not significant	TRUE	FALSE	FALSE	FALSE	TRUE	FALSE	FALSE	FALSE
pcodonTTCCCG	1343	0.108261	0.00229396	0.462	0.551	0.476708	0.571877	120	0.260133	0.0055475	0.148	0.134	0.169135	0.146356	0.41881	MIC not significant	FALSE	FALSE	FALSE	FALSE	FALSE	FALSE	FALSE	FALSE
pcodonTTCCAG	1343	0.117045	0.00126163	0.02	0.027	0.0138401	0.0179678	42	0.207085	0.0372639	0.887	0.947	0.864725	0.9116	0.220636	MIC not significant	FALSE	FALSE	FALSE	FALSE	FALSE	FALSE	FALSE	FALSE
pcodonTTCCGT	1343	0.116331	0.000218695	0.051	0.047	0.0535123	0.0448643	80	0.258563	0.00147255	0.3	0.223	0.336702	0.240125	0.735402	MIC not significant	FALSE	FALSE	FALSE	FALSE	FALSE	FALSE	FALSE	FALSE
pcodonTTCCGA	1343	0.111405	0.00117059	0.141	0.143	0.126281	0.136438	48	0.248767	0.00025813	0.856	0.748	0.848209	0.746552	0.913691	MIC not significant	FALSE	FALSE	FALSE	FALSE	FALSE	FALSE	FALSE	FALSE
pcodonTTCCGG	1343	0.108969	0.00558437	0.291	0.575	0.307708	0.597081	75	0.249575	0.00063106	0.552	0.432	0.576273	0.462771	0.830286	MIC not significant	FALSE	FALSE	FALSE	FALSE	FALSE	FALSE	FALSE	FALSE
pcodonTTCATT	1343	0.124819	0.000390589	0.072	0.065	0.0720681	0.0638801	318	0.20138	0.00953915	0.128	0.201	0.114172	0.206734	0.0820381	MIC not significant	FALSE	FALSE	FALSE	FALSE	FALSE	FALSE	FALSE	FALSE
pcodonTTCATC	1343	0.113674	0.00194925	0.249	0.311	0.261596	0.320672	145	0.169679	0.00201149	0.988	0.971	0.968571	0.954045	0.592196	MIC not significant	FALSE	FALSE	FALSE	FALSE	FALSE	FALSE	FALSE	FALSE
pcodonTTCATA	1343	0.116822	0.00957425	0.128	0.531	0.116906	0.543277	136	0.257241	0.0365709	0.19	0.519	0.177119	0.541836	0.0257337	MIC not significant	FALSE	FALSE	FALSE	FALSE	FALSE	FALSE	FALSE	FALSE
pcodonTTCATG	1343	0.136313	0.00161638	0.004	0.002	0.000539186	0.000756353	276	0.180615	0.0148783	0.712	0.901	0.727727	0.889759	0.0428878	MIC not significant	TRUE	FALSE	FALSE	FALSE	TRUE	FALSE	FALSE	FALSE
pcodonTTCACT	1343	0.11656	0.00331465	0.078	0.15	0.0691099	0.134487	100	0.229206	0.00528259	0.532	0.482	0.581443	0.527709	0.47237	MIC not significant	FALSE	FALSE	FALSE	FALSE	FALSE	FALSE	FALSE	FALSE
pcodonTTCACC	1343	0.0928737	0.000183527	0.991	0.988	0.985233	0.982026	112	0.268876	0.0334903	0.214	0.457	0.237341	0.501631	0.0534405	MIC not significant	FALSE	FALSE	FALSE	FALSE	FALSE	FALSE	FALSE	FALSE
pcodonTTCACG	1343	0.122583	0.00911289	0.042	0.276	0.0381094	0.279487	158	0.250401	0.0477502	0.159	0.715	0.178116	0.732511	0.00580963	MIC not significant	FALSE	FALSE	FALSE	FALSE	FALSE	FALSE	FALSE	FALSE
pcodonTTCAAT	1343	0.102933	0.00571233	0.65	0.894	0.661104	0.883388	74	0.256539	0.030554	0.487	0.665	0.54366	0.683158	0.136341	MIC not significant	FALSE	FALSE	FALSE	FALSE	FALSE	FALSE	FALSE	FALSE
pcodonTTCAAC	1343	0.106421	0.0030002	0.4	0.56	0.428879	0.572287	69	0.283963	0.012995	0.356	0.339	0.400926	0.390507	0.350994	MIC not significant	FALSE	FALSE	FALSE	FALSE	FALSE	FALSE	FALSE	FALSE
pcodonTTCAAA	1343	0.107943	0.00500001	0.261	0.555	0.28384	0.587614	50	0.2588	0.013932	0.721	0.676	0.749038	0.712229	0.414285	MIC not significant	FALSE	FALSE	FALSE	FALSE	FALSE	FALSE	FALSE	FALSE
pcodonTTCAAG	1343	0.140078	0.0396347	0.001	0.94	4.03675e-05	0.92983	215	0.219263	0.0563599	0.255	0.978	0.261144	0.959034	0.000446362	MIC not significant	TRUE	FALSE	FALSE	FALSE	TRUE	FALSE	FALSE	FALSE
pcodonTTCAGT	1343	0.111885	0.00228949	0.138	0.184	0.130076	0.193386	69	0.330447	0.0653193	0.1	0.396	0.0954402	0.43954	0.0340456	MIC not significant	FALSE	FALSE	FALSE	FALSE	FALSE	FALSE	FALSE	FALSE
pcodonTTCAGC	1343	0.12113	0.00290671	0.024	0.057	0.0231053	0.0459042	114	0.21775	0.0144084	0.74	0.813	0.755163	0.804748	0.203336	MIC not significant	FALSE	FALSE	FALSE	FALSE	FALSE	FALSE	FALSE	FALSE
pcodonTTCAGA	1343	0.11027	0.00289001	0.192	0.3	0.200661	0.311125	71	0.302146	0.00553251	0.217	0.173	0.237255	0.176432	0.537581	MIC not significant	FALSE	FALSE	FALSE	FALSE	FALSE	FALSE	FALSE	FALSE
pcodonTTCAGG	1343	0.112199	0.0014747	0.425	0.458	0.440758	0.482704	195	0.212902	0.040484	0.354	0.9	0.37984	0.891855	0.0047944	MIC not significant	FALSE	FALSE	FALSE	FALSE	FALSE	FALSE	FALSE	FALSE
pcodonTTCGTC	1343	0.120205	0.00262436	0.06	0.09	0.0459501	0.0816502	137	0.212419	0.0055601	0.717	0.698	0.726412	0.711856	0.386499	MIC not significant	FALSE	FALSE	FALSE	FALSE	FALSE	FALSE	FALSE	FALSE
pcodonTTCGTG	1343	0.123428	0.00717739	0.024	0.119	0.0147964	0.109627	145	0.226358	0.00309488	0.382	0.334	0.411038	0.358036	0.5063	MIC not significant	FALSE	FALSE	FALSE	FALSE	FALSE	FALSE	FALSE	FALSE
pcodonTTCGCT	1343	0.128284	0.0195495	0.00172368	0.314618	0.000529422	0.329187	96	0.204675	0.000211458	0.881	0.805	0.872803	0.798999	0.888171	MIC not significant	TRUE	FALSE	FALSE	FALSE	TRUE	FALSE	FALSE	FALSE
pcodonTTCGCC	1343	0.100022	0.00193106	0.889	0.919	0.88618	0.918116	125	0.258869	0.0352848	0.328	0.656	0.380418	0.690496	0.0359267	MIC not significant	FALSE	FALSE	FALSE	FALSE	FALSE	FALSE	FALSE	FALSE
pcodonTTCGCA	1343	0.113603	0.00548655	0.059	0.235	0.0520148	0.229299	45	0.252765	0.0242949	0.491	0.495	0.53608	0.536625	0.306574	MIC not significant	FALSE	FALSE	FALSE	FALSE	FALSE	FALSE	FALSE	FALSE
pcodonTTCGCG	1343	0.11094	7.40235e-05	0.476	0.437	0.493856	0.454925	176	0.247991	0.0196152	0.153	0.335	0.170132	0.352569	0.0637479	MIC not significant	FALSE	FALSE	FALSE	FALSE	FALSE	FALSE	FALSE	FALSE
pcodonTTCGAA	1343	0.100133	0.00146739	0.802	0.831	0.809289	0.838656	81	0.247987	0.00380119	0.353	0.292	0.415018	0.33829	0.58453	MIC not significant	FALSE	FALSE	FALSE	FALSE	FALSE	FALSE	FALSE	FALSE
pcodonTTCGAG	1343	0.10909	0.00361341	0.31	0.475	0.319001	0.492346	81	0.343041	0.0408259	0.015	0.037	0.00442476	0.0264488	0.070462	MIC not significant	FALSE	FALSE	FALSE	FALSE	FALSE	TRUE	FALSE	FALSE
pcodonTTCGGT	1343	0.105959	0.000134594	0.693	0.663	0.706045	0.679201	164	0.197534	2.94446e-05	0.787	0.696	0.806405	0.726406	0.945022	MIC not significant	FALSE	FALSE	FALSE	FALSE	FALSE	FALSE	FALSE	FALSE
pcodonTTCGGC	1343	0.11351	0.00374309	0.25	0.384	0.244995	0.393701	137	0.27254	0.0651244	0.067	0.68	0.0563489	0.696625	0.00261588	MIC not significant	FALSE	FALSE	FALSE	FALSE	FALSE	FALSE	FALSE	FALSE
pcodonTTCGGA	1343	0.117302	0.00986487	0.227	0.713	0.245152	0.71639	223	0.223336	0.0500561	0.145	0.867	0.138921	0.856186	0.00076539	MIC not significant	FALSE	FALSE	FALSE	FALSE	FALSE	FALSE	FALSE	FALSE
pcodonTTCGGG	1343	0.113588	2.83555e-05	0.302	0.266	0.295295	0.257682	160	0.263208	0.000616249	0.078	0.056	0.0618984	0.0407643	0.755351	MIC not significant	FALSE	FALSE	FALSE	FALSE	FALSE	FALSE	FALSE	FALSE
pcodonTTATTT	1343	0.117694	4.69585e-06	0.449	0.413	0.473247	0.434006	515	0.157035	0.00378633	0.661	0.707	0.687953	0.73565	0.163216	MIC not significant	FALSE	FALSE	FALSE	FALSE	FALSE	FALSE	FALSE	FALSE
pcodonTTATTC	1343	0.133305	0.019945	0.009	0.439	0.00299867	0.467183	274	0.204859	0.0205287	0.257	0.582	0.265362	0.609651	0.0176397	MIC not significant	FALSE	FALSE	FALSE	FALSE	TRUE	FALSE	FALSE	FALSE
pcodonTTATTA	1343	0.155681	0.0279501	0	0.0557525	2.79884e-08	0.0494967	500	0.214177	0.0672907	0.00025	0.811039	4.38797e-06	0.810913	3.9324e-09	non-significant monotone/non-monotone	TRUE	TRUE	FALSE	FALSE	TRUE	TRUE	FALSE	FALSE
pcodonTTATTG	1343	0.123055	0.00700691	0.108	0.355	0.10863	0.371649	308	0.17419	6.1172e-06	0.753	0.685	0.761507	0.691844	0.965518	MIC not significant	FALSE	FALSE	FALSE	FALSE	FALSE	FALSE	FALSE	FALSE
pcodonTTATCT	1343	0.110891	0.00333061	0.512	0.657	0.530217	0.675754	198	0.198711	0.00603267	0.577	0.592	0.602475	0.61562	0.276753	MIC not significant	FALSE	FALSE	FALSE	FALSE	FALSE	FALSE	FALSE	FALSE
pcodonTTATCC	1343	0.131496	0.019314	0.002	0.344	0.00161529	0.349231	162	0.274201	0.0495694	0.025	0.3	0.0149713	0.324841	0.00440424	non-significant monotone/non-monotone	TRUE	FALSE	FALSE	FALSE	TRUE	FALSE	FALSE	FALSE
pcodonTTATCA	1343	0.0998404	0.00548363	0.822	0.968	0.821224	0.954109	68	0.281036	0.000700806	0.441	0.332	0.470323	0.351112	0.830321	MIC not significant	FALSE	FALSE	FALSE	FALSE	FALSE	FALSE	FALSE	FALSE
pcodonTTATCG	1343	0.13893	0.0156744	0.000381579	0.0481316	7.05616e-05	0.0426167	212	0.193145	0.0475498	0.740408	0.999395	0.751506	0.995863	0.00139951	MIC not significant	TRUE	FALSE	FALSE	FALSE	TRUE	FALSE	FALSE	FALSE
pcodonTTATAT	1343	0.121191	0.0219825	0.139	0.977	0.13058	0.967776	253	0.21106	0.0388758	0.183	0.815	0.183583	0.821398	0.00162357	MIC not significant	FALSE	FALSE	FALSE	FALSE	FALSE	FALSE	FALSE	FALSE
pcodonTTATAC	1343	0.103207	0.00288259	0.665	0.789	0.689604	0.796795	100	0.257278	0.0803485	0.234	0.946	0.258977	0.922753	0.00426584	MIC not significant	FALSE	FALSE	FALSE	FALSE	FALSE	FALSE	FALSE	FALSE
pcodonTTATAA	1343	0.119228	0.0147755	0.043	0.597	0.0379334	0.630354	112	0.272981	0.0014265	0.179	0.128	0.181221	0.125169	0.692573	MIC not significant	FALSE	FALSE	FALSE	FALSE	FALSE	FALSE	FALSE	FALSE
pcodonTTATAG	1343	0.101703	0.00126754	0.757	0.783	0.782227	0.804224	106	0.227736	0.00705298	0.766	0.739	0.776502	0.75322	0.392048	MIC not significant	FALSE	FALSE	FALSE	FALSE	FALSE	FALSE	FALSE	FALSE
pcodonTTATGT	1343	0.127864	0.0159535	0.006	0.263	0.00274635	0.283559	136	0.214865	0.0134841	0.688	0.771	0.701477	0.767892	0.178221	MIC not significant	TRUE	FALSE	FALSE	FALSE	TRUE	FALSE	FALSE	FALSE
pcodonTTATGC	1343	0.128808	0.00699057	0.018	0.073	0.00906715	0.0673988	221	0.197638	0.0481844	0.481	0.991	0.52367	0.983933	0.0010202	MIC not significant	FALSE	FALSE	FALSE	FALSE	FALSE	FALSE	FALSE	FALSE
pcodonTTATGA	1343	0.117303	0.000822142	0.114	0.111	0.105445	0.107994	147	0.237319	0.00229934	0.222	0.184	0.246799	0.195974	0.564109	MIC not significant	FALSE	FALSE	FALSE	FALSE	FALSE	FALSE	FALSE	FALSE
pcodonTTATGG	1343	0.107764	0.00119683	0.794	0.814	0.792451	0.810393	273	0.219408	0.0133736	0.096	0.187	0.0819197	0.190669	0.0563399	MIC not significant	FALSE	FALSE	FALSE	FALSE	FALSE	FALSE	FALSE	FALSE
pcodonTTACTT	1343	0.123942	1.1722e-05	0.092	0.076	0.0898924	0.0709796	295	0.190606	0.00752746	0.526	0.619	0.551101	0.644208	0.137108	MIC not significant	FALSE	FALSE	FALSE	FALSE	FALSE	FALSE	FALSE	FALSE
pcodonTTACTC	1343	0.115532	0.00622943	0.103	0.281	0.089457	0.297276	93	0.276626	0.150745	0.208487	0.999908	0.224566	0.998845	0.000120258	MIC not significant	FALSE	FALSE	FALSE	FALSE	FALSE	FALSE	FALSE	FALSE
pcodonTTACTA	1343	0.11683	0.00632203	0.099	0.288	0.0894887	0.297951	119	0.218561	0.000449777	0.635	0.543	0.660489	0.567243	0.818919	MIC not significant	FALSE	FALSE	FALSE	FALSE	FALSE	FALSE	FALSE	FALSE
pcodonTTACTG	1343	0.1042	0.00101604	0.762	0.775	0.776711	0.787638	156	0.244473	0.0233458	0.253	0.45	0.258555	0.495214	0.0568795	MIC not significant	FALSE	FALSE	FALSE	FALSE	FALSE	FALSE	FALSE	FALSE
pcodonTTACCT	1343	0.131486	0.0057768	0.007	0.027	0.00344402	0.0209208	196	0.201453	0.0130974	0.568	0.72	0.608566	0.73377	0.110217	MIC not significant	FALSE	FALSE	FALSE	FALSE	TRUE	FALSE	FALSE	FALSE
pcodonTTACCC	1343	0.110678	0.00299278	0.192	0.296	0.188048	0.300169	62	0.197398	0.0167873	0.903	0.908	0.872514	0.877266	0.315533	MIC not significant	FALSE	FALSE	FALSE	FALSE	FALSE	FALSE	FALSE	FALSE
pcodonTTACCA	1343	0.107747	0.000929335	0.29	0.3	0.305635	0.316984	42	0.262727	0.00816365	0.527	0.416	0.565931	0.446747	0.569323	MIC not significant	FALSE	FALSE	FALSE	FALSE	FALSE	FALSE	FALSE	FALSE
pcodonTTACCG	1343	0.101044	0.00114381	0.871	0.888	0.877057	0.890982	146	0.275889	0.0362315	0.039	0.149	0.018879	0.160099	0.0213765	MIC not significant	FALSE	FALSE	FALSE	FALSE	FALSE	FALSE	FALSE	FALSE
pcodonTTACAG	1343	0.116391	0.00568872	0.054	0.18	0.0461743	0.177567	78	0.231951	0.0120323	0.582	0.596	0.635627	0.62719	0.339062	MIC not significant	FALSE	FALSE	FALSE	FALSE	FALSE	FALSE	FALSE	FALSE
pcodonTTACGT	1343	0.113003	2.09761e-05	0.275	0.236	0.287004	0.252415	136	0.232156	0.0106232	0.453	0.494	0.487591	0.523387	0.232452	MIC not significant	FALSE	FALSE	FALSE	FALSE	FALSE	FALSE	FALSE	FALSE
pcodonTTACGA	1343	0.112544	0.00710921	0.211	0.554	0.224956	0.566836	111	0.264844	0.00632698	0.23	0.207	0.269993	0.238704	0.406618	MIC not significant	FALSE	FALSE	FALSE	FALSE	FALSE	FALSE	FALSE	FALSE
pcodonTTACGG	1343	0.11146	0.00725413	0.277	0.679	0.301392	0.673061	117	0.236805	0.000778843	0.489	0.389	0.512915	0.415374	0.76518	MIC not significant	FALSE	FALSE	FALSE	FALSE	FALSE	FALSE	FALSE	FALSE
pcodonTTAATT	1343	0.113856	0.00900156	0.636	0.944	0.651154	0.934244	534	0.17567	0.0465709	0.082	0.999	0.0598711	0.987782	4.78778e-07	MIC not significant	FALSE	FALSE	FALSE	FALSE	FALSE	FALSE	FALSE	FALSE
pcodonTTAATC	1343	0.120264	0.0154555	0.193	0.876	0.18263	0.872274	279	0.181796	0.0223758	0.666	0.947	0.67936	0.933769	0.0123688	MIC not significant	FALSE	FALSE	FALSE	FALSE	FALSE	FALSE	FALSE	FALSE
pcodonTTAATA	1343	0.120592	0.00267325	0.125	0.168	0.127073	0.193364	229	0.224563	0.00558603	0.236	0.25	0.251434	0.264059	0.259994	MIC not significant	FALSE	FALSE	FALSE	FALSE	FALSE	FALSE	FALSE	FALSE
pcodonTTAATG	1343	0.112151	0.000823413	0.656	0.665	0.672368	0.676741	376	0.179563	0.00159046	0.401	0.366	0.421982	0.388776	0.44068	MIC not significant	FALSE	FALSE	FALSE	FALSE	FALSE	FALSE	FALSE	FALSE
pcodonTTAACT	1343	0.110045	0.000869463	0.529	0.533	0.538894	0.542711	183	0.289257	0.000819063	0.008	0.003	0.00155702	0.00073029	0.700548	MIC not significant	FALSE	FALSE	FALSE	FALSE	FALSE	TRUE	FALSE	FALSE
pcodonTTAACC	1343	0.135595	0.0214797	0.001	0.235	8.93531e-05	0.239926	172	0.194827	0.0073993	0.741	0.766	0.753511	0.775196	0.261869	MIC not significant	TRUE	FALSE	FALSE	FALSE	TRUE	FALSE	FALSE	FALSE
pcodonTTAACA	1343	0.113379	0.001181	0.112	0.13	0.11292	0.125922	77	0.22443	0.000490011	0.736	0.594	0.751355	0.641016	0.848455	MIC not significant	FALSE	FALSE	FALSE	FALSE	FALSE	FALSE	FALSE	FALSE
pcodonTTAACG	1343	0.160553	0.0506495	0	0.645475	2.07619e-11	0.658178	273	0.287386	0.128	2.63158e-05	0.968934	2.4343e-07	0.952736	1.15124e-09	Monotone	TRUE	TRUE	FALSE	TRUE	TRUE	TRUE	FALSE	FALSE
pcodonTTAAAT	1343	0.109775	0.0034454	0.329	0.474	0.345453	0.498898	106	0.250316	0.00119523	0.505	0.412	0.537574	0.450195	0.724968	MIC not significant	FALSE	FALSE	FALSE	FALSE	FALSE	FALSE	FALSE	FALSE
pcodonTTAAAC	1343	0.111364	6.88713e-05	0.253	0.225	0.256702	0.225531	106	0.267543	0.0137664	0.304	0.361	0.355392	0.402792	0.230992	MIC not significant	FALSE	FALSE	FALSE	FALSE	FALSE	FALSE	FALSE	FALSE
pcodonTTAAAA	1343	0.109605	0.000271756	0.185	0.164	0.197785	0.17617	49	0.32054	0.0289709	0.341	0.392	0.390887	0.448715	0.2423	MIC not significant	FALSE	FALSE	FALSE	FALSE	FALSE	FALSE	FALSE	FALSE
pcodonTTAAAG	1343	0.141685	0.0306592	0.000171053	0.566671	3.08721e-05	0.582178	260	0.24578	0.108355	0.0200526	0.999961	0.0104681	0.999045	5.49883e-08	Monotone	TRUE	FALSE	FALSE	FALSE	TRUE	FALSE	FALSE	FALSE
pcodonTTAAGT	1343	0.11553	0.00844126	0.086	0.369	0.0751787	0.394111	87	0.257355	0.042232	0.528	0.853	0.582319	0.839908	0.0561943	MIC not significant	FALSE	FALSE	FALSE	FALSE	FALSE	FALSE	FALSE	FALSE
pcodonTTAAGC	1343	0.135381	0.0245955	0.000381579	0.336079	5.86973e-05	0.35071	140	0.312821	0.0730101	0.005	0.235	0.00115599	0.237709	0.00124351	non-significant monotone/non-monotone	TRUE	FALSE	FALSE	FALSE	TRUE	TRUE	FALSE	FALSE
pcodonTTAAGA	1343	0.115308	0.00216239	0.067	0.094	0.0601893	0.0903363	67	0.313962	0.0186459	0.195	0.23	0.20659	0.237286	0.270528	MIC not significant	FALSE	FALSE	FALSE	FALSE	FALSE	FALSE	FALSE	FALSE
pcodonTTAAGG	1343	0.144587	0.0311321	2.63158e-05	0.419526	4.13443e-06	0.433768	253	0.244704	0.086913	0.006	0.971	0.00419393	0.956056	1.81941e-06	Monotone	TRUE	FALSE	FALSE	FALSE	TRUE	TRUE	FALSE	FALSE
pcodonTTAGTC	1343	0.117518	0.00698247	0.127	0.394	0.131538	0.416491	158	0.236627	0.059866	0.288	0.961	0.31487	0.938805	0.00194613	MIC not significant	FALSE	FALSE	FALSE	FALSE	FALSE	FALSE	FALSE	FALSE
pcodonTTAGTG	1343	0.104737	0.00253104	0.79	0.855	0.784952	0.850953	165	0.218291	0.00936172	0.47	0.513	0.496825	0.553988	0.216344	MIC not significant	FALSE	FALSE	FALSE	FALSE	FALSE	FALSE	FALSE	FALSE
pcodonTTAGCT	1343	0.125514	0.00487812	0.005	0.026	0.00496532	0.0238632	124	0.245111	0.00931748	0.483	0.509	0.520939	0.534363	0.286204	MIC not significant	TRUE	FALSE	FALSE	FALSE	TRUE	FALSE	FALSE	FALSE
pcodonTTAGCC	1343	0.132218	0.00569394	0.002	0.004	9.05859e-05	0.00123923	107	0.273815	0.0909703	0.243	0.973	0.258901	0.95315	0.00159333	MIC not significant	TRUE	FALSE	FALSE	FALSE	TRUE	FALSE	FALSE	FALSE
pcodonTTAGCA	1343	0.101792	0.00019391	0.73	0.689	0.739826	0.710257	42	0.282005	0.0296519	0.383	0.44	0.438639	0.482511	0.275511	MIC not significant	FALSE	FALSE	FALSE	FALSE	FALSE	FALSE	FALSE	FALSE
pcodonTTAGCG	1343	0.117722	0.00382485	0.135	0.255	0.141852	0.260812	161	0.249694	0.0739008	0.147	0.958	0.147317	0.944614	0.000485909	MIC not significant	FALSE	FALSE	FALSE	FALSE	FALSE	FALSE	FALSE	FALSE
pcodonTTAGAA	1343	0.102734	0.000390535	0.609	0.586	0.6405	0.617115	66	0.366802	0.0435586	0.039	0.113	0.0278432	0.100097	0.0926228	MIC not significant	FALSE	FALSE	FALSE	FALSE	FALSE	FALSE	FALSE	FALSE
pcodonTTAGAG	1343	0.095952	6.0857e-07	0.959	0.939	0.94505	0.928821	55	0.290542	0.0492901	0.326	0.58	0.367878	0.602048	0.103296	MIC not significant	FALSE	FALSE	FALSE	FALSE	FALSE	FALSE	FALSE	FALSE
pcodonTTAGGT	1343	0.117923	0.00508127	0.133	0.309	0.12817	0.314008	180	0.241601	0.000305372	0.166	0.126	0.184492	0.131007	0.81589	MIC not significant	FALSE	FALSE	FALSE	FALSE	FALSE	FALSE	FALSE	FALSE
pcodonTTAGGC	1343	0.111856	0.00235339	0.474	0.556	0.487481	0.574748	201	0.258252	0.012612	0.048	0.077	0.039331	0.0801992	0.112453	MIC not significant	FALSE	FALSE	FALSE	FALSE	FALSE	FALSE	FALSE	FALSE
pcodonTTAGGA	1343	0.137229	0.0179974	0.003	0.179	0.00045977	0.182174	260	0.257931	0.0837577	0.009	0.898	0.00120583	0.881248	2.07424e-06	non-significant monotone/non-monotone	TRUE	FALSE	FALSE	FALSE	TRUE	TRUE	FALSE	FALSE
pcodonTTAGGG	1343	0.115695	0.000291947	0.339	0.306	0.322862	0.302002	230	0.211368	0.000981427	0.417	0.361	0.449697	0.38913	0.636473	MIC not significant	FALSE	FALSE	FALSE	FALSE	FALSE	FALSE	FALSE	FALSE
pcodonTTGTTT	1343	0.165475	0.0571339	0	0.762891	2.39859e-13	0.768171	309	0.212282	0.00344799	0.078	0.078	0.061587	0.0657077	0.303526	MIC not significant	TRUE	FALSE	FALSE	FALSE	TRUE	FALSE	FALSE	FALSE
pcodonTTGTTC	1343	0.125636	0.0252797	0.035	0.963	0.0259563	0.943564	236	0.206566	0.00119476	0.45	0.394	0.47655	0.409044	0.597263	MIC not significant	FALSE	FALSE	FALSE	FALSE	FALSE	FALSE	FALSE	FALSE
pcodonTTGTTA	1343	0.147646	0.0272281	1.31579e-05	0.119237	4.91799e-07	0.117549	241	0.214455	0.000859142	0.239	0.206	0.259393	0.209734	0.65072	MIC not significant	TRUE	FALSE	FALSE	FALSE	TRUE	FALSE	FALSE	FALSE
pcodonTTGTTG	1343	0.161668	0.0539573	0	0.772634	1.0219e-11	0.776759	286	0.194246	0.0182487	0.313	0.632	0.326161	0.650324	0.0223117	MIC not significant	TRUE	FALSE	FALSE	FALSE	TRUE	FALSE	FALSE	FALSE
pcodonTTGTCT	1343	0.129161	0.0296481	0.006	0.911	0.00177039	0.899539	143	0.185122	5.20226e-05	0.924	0.869	0.901688	0.847653	0.931868	MIC not significant	TRUE	FALSE	FALSE	FALSE	TRUE	FALSE	FALSE	FALSE
pcodonTTGTCC	1343	0.117294	0.00474355	0.07	0.172	0.0638317	0.180617	102	0.26133	0.000235166	0.45	0.352	0.492872	0.384328	0.878416	MIC not significant	FALSE	FALSE	FALSE	FALSE	FALSE	FALSE	FALSE	FALSE
pcodonTTGTCA	1343	0.129002	0.0231257	0.0005	0.388934	5.26831e-05	0.410143	67	0.225621	0.00329567	0.907	0.837	0.88392	0.830918	0.644481	MIC not significant	TRUE	FALSE	FALSE	FALSE	TRUE	FALSE	FALSE	FALSE
pcodonTTGTCG	1343	0.115915	0.0090222	0.172	0.606	0.17372	0.613843	156	0.223927	0.0016713	0.541	0.473	0.563737	0.490879	0.612354	MIC not significant	FALSE	FALSE	FALSE	FALSE	FALSE	FALSE	FALSE	FALSE
pcodonTTGTAT	1343	0.1358	0.0183511	0.002	0.115	9.93285e-05	0.113049	161	0.176857	0.00328146	0.984	0.971	0.959592	0.949304	0.470428	MIC not significant	TRUE	FALSE	FALSE	FALSE	TRUE	FALSE	FALSE	FALSE
pcodonTTGTAC	1343	0.120193	0.0177671	0.02	0.674	0.0117802	0.686145	90	0.216831	0.0221767	0.855	0.922	0.84597	0.906867	0.161261	MIC not significant	FALSE	FALSE	FALSE	FALSE	FALSE	FALSE	FALSE	FALSE
pcodonTTGTAA	1343	0.121683	0.0175026	0.007	0.486	0.00299683	0.511094	65	0.257574	0.00127822	0.706	0.578	0.721217	0.616341	0.777376	MIC not significant	FALSE	FALSE	FALSE	FALSE	TRUE	FALSE	FALSE	FALSE
pcodonTTGTAG	1343	0.132811	0.0211167	0.002	0.285	0.000214928	0.289558	134	0.176253	5.31718e-05	0.996	0.986	0.976527	0.95856	0.933358	MIC not significant	TRUE	FALSE	FALSE	FALSE	TRUE	FALSE	FALSE	FALSE
pcodonTTGTGT	1343	0.149648	0.0452185	0	0.647178	5.50774e-10	0.66089	121	0.261685	0.00846528	0.146	0.157	0.147246	0.156048	0.315522	MIC not significant	TRUE	FALSE	FALSE	FALSE	TRUE	FALSE	FALSE	FALSE
pcodonTTGTGC	1343	0.115636	0.00682878	0.22	0.538	0.238439	0.553245	177	0.197752	0.00352548	0.826	0.798	0.822212	0.804035	0.43243	MIC not significant	FALSE	FALSE	FALSE	FALSE	FALSE	FALSE	FALSE	FALSE
pcodonTTGTGA	1343	0.120755	0.00785601	0.057	0.309	0.0636517	0.307724	159	0.213578	0.00876255	0.655	0.692	0.671469	0.702765	0.240546	MIC not significant	FALSE	FALSE	FALSE	FALSE	FALSE	FALSE	FALSE	FALSE
pcodonTTGTGG	1343	0.129423	0.00506529	0.018	0.045	0.0094202	0.0415357	275	0.198063	0.00378523	0.345	0.353	0.388957	0.391259	0.309354	MIC not significant	FALSE	FALSE	FALSE	FALSE	FALSE	FALSE	FALSE	FALSE
pcodonTTGCTT	1343	0.108785	0.00568077	0.636	0.87	0.645575	0.858704	190	0.207502	0.000505842	0.534	0.453	0.561937	0.479007	0.758075	MIC not significant	FALSE	FALSE	FALSE	FALSE	FALSE	FALSE	FALSE	FALSE
pcodonTTGCTC	1343	0.114352	0.00790781	0.076	0.355	0.0656145	0.374754	65	0.33064	0.0404216	0.172	0.33	0.190561	0.358142	0.108291	MIC not significant	FALSE	FALSE	FALSE	FALSE	FALSE	FALSE	FALSE	FALSE
pcodonTTGCTA	1343	0.120514	0.0208055	0.022	0.798	0.0103822	0.797169	82	0.246946	0.000213338	0.746	0.645	0.770111	0.674058	0.896376	MIC not significant	FALSE	FALSE	FALSE	FALSE	FALSE	FALSE	FALSE	FALSE
pcodonTTGCTG	1343	0.119246	0.0155541	0.028	0.6	0.0238333	0.618971	95	0.224808	7.56584e-06	0.664	0.555	0.701134	0.594752	0.978895	MIC not significant	FALSE	FALSE	FALSE	FALSE	FALSE	FALSE	FALSE	FALSE
pcodonTTGCCT	1343	0.113345	0.00114917	0.31	0.324	0.316352	0.335355	161	0.201239	0.00655619	0.793	0.796	0.789815	0.794305	0.307221	MIC not significant	FALSE	FALSE	FALSE	FALSE	FALSE	FALSE	FALSE	FALSE
pcodonTTGCCC	1343	0.111752	0.00586074	0.11	0.361	0.106387	0.366148	57	0.32799	0.0316001	0.128	0.184	0.119765	0.184632	0.185862	MIC not significant	FALSE	FALSE	FALSE	FALSE	FALSE	FALSE	FALSE	FALSE
pcodonTTGCCA	1343	0.113123	0.00523555	0.078	0.255	0.0794579	0.261332	55	0.327487	0.00476792	0.148	0.106	0.15703	0.0962569	0.616423	MIC not significant	FALSE	FALSE	FALSE	FALSE	FALSE	FALSE	FALSE	FALSE
pcodonTTGCCG	1343	0.127088	0.00783975	0.014	0.065	0.00578809	0.061877	137	0.237312	0.00661178	0.353	0.344	0.384452	0.368566	0.34487	MIC not significant	FALSE	FALSE	FALSE	FALSE	TRUE	FALSE	FALSE	FALSE
pcodonTTGCAG	1343	0.108483	0.00352188	0.263	0.416	0.276345	0.451653	56	0.297351	0.000100277	0.281	0.19	0.313623	0.206103	0.941608	MIC not significant	FALSE	FALSE	FALSE	FALSE	FALSE	FALSE	FALSE	FALSE
pcodonTTGCGT	1343	0.1116	0.00273216	0.238	0.317	0.238702	0.340003	100	0.25174	3.65858e-05	0.313	0.226	0.340189	0.238702	0.952374	MIC not significant	FALSE	FALSE	FALSE	FALSE	FALSE	FALSE	FALSE	FALSE
pcodonTTGCGC	1343	0.107163	0.00428796	0.326	0.579	0.360532	0.61935	43	0.243018	0.00349557	0.621	0.468	0.66248	0.52045	0.706469	MIC not significant	FALSE	FALSE	FALSE	FALSE	FALSE	FALSE	FALSE	FALSE
pcodonTTGCGA	1343	0.105708	0.0142733	0.48	0.99	0.475685	0.983244	71	0.198645	6.53159e-05	0.978	0.93	0.937459	0.905252	0.946639	MIC not significant	FALSE	FALSE	FALSE	FALSE	FALSE	FALSE	FALSE	FALSE
pcodonTTGCGG	1343	0.106933	0.0065647	0.409	0.768	0.430476	0.771039	87	0.304095	0.00372786	0.147	0.118	0.161663	0.114831	0.574265	MIC not significant	FALSE	FALSE	FALSE	FALSE	FALSE	FALSE	FALSE	FALSE
pcodonTTGATT	1343	0.142013	0.02344	0.000789474	0.318684	0.000158406	0.332016	447	0.203702	0.000457658	0.014	0.009	0.00455785	0.00271044	0.65193	Non-monotone	TRUE	FALSE	FALSE	FALSE	TRUE	TRUE	FALSE	FALSE
pcodonTTGATC	1343	0.119856	0.00387101	0.155	0.283	0.15737	0.289569	254	0.163969	0.00629075	0.944	0.954	0.926686	0.941838	0.207737	MIC not significant	FALSE	FALSE	FALSE	FALSE	FALSE	FALSE	FALSE	FALSE
pcodonTTGATA	1343	0.131619	0.0153437	0.005	0.248	0.00301183	0.245918	225	0.227397	0.00737441	0.095	0.122	0.0854232	0.11065	0.199382	MIC not significant	TRUE	FALSE	FALSE	FALSE	TRUE	FALSE	FALSE	FALSE
pcodonTTGATG	1343	0.130244	0.0231319	0.019	0.837	0.0160267	0.841241	333	0.204948	0.00174937	0.111	0.109	0.108712	0.0982713	0.446833	MIC not significant	FALSE	FALSE	FALSE	FALSE	FALSE	FALSE	FALSE	FALSE
pcodonTTGACT	1343	0.131161	0.0190717	0.006	0.396	0.00207883	0.414473	194	0.202308	0.00903977	0.573	0.635	0.599723	0.659239	0.187266	MIC not significant	TRUE	FALSE	FALSE	FALSE	TRUE	FALSE	FALSE	FALSE
pcodonTTGACC	1343	0.119312	4.92316e-05	0.09	0.073	0.0852862	0.0706101	171	0.23738	0.000451439	0.152	0.108	0.159515	0.107855	0.782675	MIC not significant	FALSE	FALSE	FALSE	FALSE	FALSE	FALSE	FALSE	FALSE
pcodonTTGACA	1343	0.114227	0.00666125	0.094	0.344	0.0908443	0.343231	80	0.215362	0.0367755	0.732	0.92	0.742807	0.90531	0.0883628	MIC not significant	FALSE	FALSE	FALSE	FALSE	FALSE	FALSE	FALSE	FALSE
pcodonTTGACG	1343	0.111115	0.000303006	0.596	0.571	0.612537	0.590083	251	0.196443	0.0179517	0.397	0.714	0.445184	0.715539	0.033864	MIC not significant	FALSE	FALSE	FALSE	FALSE	FALSE	FALSE	FALSE	FALSE
pcodonTTGAAT	1343	0.136814	0.0309725	0.000263158	0.630237	3.2047e-05	0.645795	145	0.257092	0.00852418	0.105	0.105	0.095266	0.0996432	0.269378	MIC not significant	TRUE	FALSE	FALSE	FALSE	TRUE	FALSE	FALSE	FALSE
pcodonTTGAAC	1343	0.119024	0.011851	0.079	0.54	0.0589212	0.55543	137	0.260274	0.000488249	0.137	0.093	0.135264	0.0838543	0.797725	MIC not significant	FALSE	FALSE	FALSE	FALSE	FALSE	FALSE	FALSE	FALSE
pcodonTTGAAA	1343	0.111381	0.00521925	0.203	0.425	0.212227	0.453218	83	0.339616	0.00240319	0.06	0.038	0.0408044	0.0229876	0.65986	MIC not significant	FALSE	FALSE	FALSE	FALSE	FALSE	FALSE	FALSE	FALSE
pcodonTTGAAG	1343	0.113257	0.0010691	0.542	0.556	0.557109	0.571804	297	0.193728	0.00400418	0.468	0.478	0.488098	0.503219	0.277031	MIC not significant	FALSE	FALSE	FALSE	FALSE	FALSE	FALSE	FALSE	FALSE
pcodonTTGAGT	1343	0.122015	0.022856	0.02	0.825	0.0153955	0.835567	101	0.32171	0.00104597	0.009	0.005	0.00649249	0.00260603	0.748161	Non-monotone	FALSE	FALSE	FALSE	FALSE	FALSE	FALSE	FALSE	FALSE
pcodonTTGAGC	1343	0.101252	0.00124663	0.89	0.905	0.880589	0.895764	146	0.213241	0.00668636	0.511	0.503	0.557789	0.555407	0.326502	MIC not significant	FALSE	FALSE	FALSE	FALSE	FALSE	FALSE	FALSE	FALSE
pcodonTTGAGA	1343	0.116063	0.00855732	0.109	0.463	0.109679	0.486219	115	0.279668	0.00145379	0.109	0.083	0.108568	0.0725554	0.685798	MIC not significant	FALSE	FALSE	FALSE	FALSE	FALSE	FALSE	FALSE	FALSE
pcodonTTGAGG	1343	0.13951	0.00555377	0.000434211	0.00271053	9.51168e-05	0.00108094	251	0.196443	2.05355e-05	0.435	0.366	0.48131	0.403663	0.943051	MIC not significant	TRUE	FALSE	FALSE	FALSE	TRUE	FALSE	FALSE	FALSE
pcodonTTGGTC	1343	0.114638	0.00381474	0.128	0.255	0.137441	0.261663	117	0.253419	1.95114e-05	0.263	0.18	0.290724	0.198581	0.962301	MIC not significant	FALSE	FALSE	FALSE	FALSE	FALSE	FALSE	FALSE	FALSE
pcodonTTGGTG	1343	0.128011	0.0199289	0.008	0.528	0.00358252	0.527955	147	0.161569	0.000662787	0.994	0.983	0.981634	0.967339	0.756923	MIC not significant	FALSE	FALSE	FALSE	FALSE	TRUE	FALSE	FALSE	FALSE
pcodonTTGGCT	1343	0.125721	0.0249431	0.011	0.878	0.0100466	0.878807	157	0.217166	0.0413006	0.621	0.974	0.656999	0.958117	0.0106874	MIC not significant	FALSE	FALSE	FALSE	FALSE	FALSE	FALSE	FALSE	FALSE
pcodonTTGGCC	1343	0.113684	0.0123048	0.22	0.821	0.228006	0.813639	131	0.246038	0.00310298	0.345	0.298	0.389101	0.333718	0.527422	MIC not significant	FALSE	FALSE	FALSE	FALSE	FALSE	FALSE	FALSE	FALSE
pcodonTTGGCA	1343	0.120859	0.0207672	0.016	0.768	0.00917678	0.772685	76	0.290645	0.00158692	0.187	0.135	0.19863	0.128755	0.732604	MIC not significant	FALSE	FALSE	FALSE	FALSE	FALSE	FALSE	FALSE	FALSE
pcodonTTGGCG	1343	0.120482	0.0180916	0.14	0.917	0.136444	0.907279	223	0.266186	6.92299e-05	0.003	0.003	0.000775613	0.000331766	0.901668	MIC not significant	FALSE	TRUE	FALSE	FALSE	FALSE	TRUE	FALSE	FALSE
pcodonTTGGAA	1343	0.115889	0.0103065	0.084	0.51	0.0827404	0.521853	96	0.204264	0.00380023	0.894	0.833	0.870901	0.827149	0.550734	MIC not significant	FALSE	FALSE	FALSE	FALSE	FALSE	FALSE	FALSE	FALSE
pcodonTTGGAG	1343	0.109125	0.00163958	0.226	0.256	0.245529	0.289125	56	0.194886	0.0127588	0.965	0.951	0.93718	0.92509	0.407179	MIC not significant	FALSE	FALSE	FALSE	FALSE	FALSE	FALSE	FALSE	FALSE
pcodonTTGGGT	1343	0.133931	0.0142482	0.001	0.1	0.000804828	0.11045	223	0.199959	0.000316451	0.447	0.368	0.498317	0.41913	0.791645	MIC not significant	TRUE	FALSE	FALSE	FALSE	TRUE	FALSE	FALSE	FALSE
pcodonTTGGGC	1343	0.11517	0.00470309	0.239	0.435	0.242598	0.453067	177	0.250532	6.41649e-06	0.14	0.09	0.137913	0.0927612	0.973306	MIC not significant	FALSE	FALSE	FALSE	FALSE	FALSE	FALSE	FALSE	FALSE
pcodonTTGGGA	1343	0.116806	0.0081491	0.267	0.663	0.278487	0.68085	246	0.210741	0.00701454	0.255	0.287	0.249001	0.302464	0.190459	MIC not significant	FALSE	FALSE	FALSE	FALSE	FALSE	FALSE	FALSE	FALSE
pcodonTTGGGG	1343	0.137272	0.0213371	0.001	0.195	0.000111968	0.212345	192	0.193621	0.000164732	0.731	0.641	0.738043	0.657482	0.859752	MIC not significant	TRUE	FALSE	FALSE	FALSE	TRUE	FALSE	FALSE	FALSE
pcodonTCTTTT	1343	0.123525	0.0191118	0.037	0.78	0.0386448	0.79294	191	0.192781	0.00615239	0.758	0.787	0.771172	0.79429	0.280779	MIC not significant	FALSE	FALSE	FALSE	FALSE	FALSE	FALSE	FALSE	FALSE
pcodonTCTTTC	1343	0.109955	0.00583779	0.459	0.756	0.483325	0.757901	153	0.190678	3.63145e-05	0.948	0.91	0.92586	0.886499	0.941067	MIC not significant	FALSE	FALSE	FALSE	FALSE	FALSE	FALSE	FALSE	FALSE
pcodonTCTTTA	1343	0.1181	0.0017007	0.142	0.174	0.144959	0.176963	174	0.267046	6.63028e-05	0.069	0.043	0.0578671	0.0353828	0.915077	MIC not significant	FALSE	FALSE	FALSE	FALSE	FALSE	FALSE	FALSE	FALSE
pcodonTCTTTG	1343	0.135154	0.0342115	0.000513158	0.867658	9.58514e-05	0.864473	148	0.212262	0.00404892	0.819	0.792	0.819176	0.794417	0.442296	MIC not significant	TRUE	FALSE	FALSE	FALSE	TRUE	FALSE	FALSE	FALSE
pcodonTCTTCT	1343	0.108148	0.00567593	0.362	0.648	0.381892	0.669012	86	0.27802	0.0121472	0.37	0.366	0.407387	0.4081	0.312394	MIC not significant	FALSE	FALSE	FALSE	FALSE	FALSE	FALSE	FALSE	FALSE
pcodonTCTTCC	1343	0.109747	0.00735531	0.275	0.651	0.28507	0.673976	71	0.224554	0.00414365	0.825	0.761	0.826222	0.766147	0.593807	MIC not significant	FALSE	FALSE	FALSE	FALSE	FALSE	FALSE	FALSE	FALSE
pcodonTCTTCA	1343	0.106386	0.0116822	0.371	0.98	0.406671	0.954695	48	0.466939	0.0102584	0.014	0.011	0.00231291	0.00103513	0.493356	MIC not significant	FALSE	FALSE	FALSE	FALSE	FALSE	TRUE	FALSE	FALSE
pcodonTCTTCG	1343	0.114013	0.00819936	0.151	0.512	0.146148	0.523902	98	0.218275	0.00254203	0.711	0.619	0.725635	0.646891	0.621993	MIC not significant	FALSE	FALSE	FALSE	FALSE	FALSE	FALSE	FALSE	FALSE
pcodonTCTTAT	1343	0.114863	0.00221416	0.262	0.323	0.266294	0.33882	176	0.209418	0.000197781	0.715	0.63	0.734125	0.659894	0.853031	MIC not significant	FALSE	FALSE	FALSE	FALSE	FALSE	FALSE	FALSE	FALSE
pcodonTCTTAC	1343	0.109355	0.00552238	0.203	0.486	0.208942	0.521918	47	0.29039	0.0266209	0.603	0.659	0.63889	0.678097	0.272222	MIC not significant	FALSE	FALSE	FALSE	FALSE	FALSE	FALSE	FALSE	FALSE
pcodonTCTTAA	1343	0.107532	0.00614525	0.313	0.694	0.34099	0.705372	56	0.236987	0.0310511	0.74	0.845	0.753172	0.827749	0.193381	MIC not significant	FALSE	FALSE	FALSE	FALSE	FALSE	FALSE	FALSE	FALSE
pcodonTCTTAG	1343	0.108868	0.00579185	0.31	0.597	0.324288	0.617641	84	0.277242	0.00223192	0.343	0.265	0.399641	0.306407	0.669567	MIC not significant	FALSE	FALSE	FALSE	FALSE	FALSE	FALSE	FALSE	FALSE
pcodonTCTTGT	1343	0.10997	0.0130374	0.237	0.883	0.257031	0.885638	76	0.227801	5.65339e-05	0.748	0.635	0.752285	0.641238	0.948602	MIC not significant	FALSE	FALSE	FALSE	FALSE	FALSE	FALSE	FALSE	FALSE
pcodonTCTTGC	1343	0.110101	2.4139e-05	0.192	0.162	0.188643	0.153468	57	0.305806	0.00693207	0.186	0.139	0.212089	0.152753	0.538068	MIC not significant	FALSE	FALSE	FALSE	FALSE	FALSE	FALSE	FALSE	FALSE
pcodonTCTTGA	1343	0.11525	0.00775092	0.077	0.349	0.077396	0.368162	87	0.334124	0.0357106	0.068	0.146	0.0499062	0.136372	0.0796096	MIC not significant	FALSE	FALSE	FALSE	FALSE	FALSE	FALSE	FALSE	FALSE
pcodonTCTTGG	1343	0.110102	0.00618748	0.457	0.735	0.457041	0.748306	150	0.257317	0.00290229	0.21	0.182	0.22087	0.186411	0.512621	MIC not significant	FALSE	FALSE	FALSE	FALSE	FALSE	FALSE	FALSE	FALSE
pcodonTCTCTT	1343	0.108491	0.0117834	0.39	0.927	0.410555	0.915729	103	0.263674	0.000857	0.409	0.321	0.459869	0.363827	0.769108	MIC not significant	FALSE	FALSE	FALSE	FALSE	FALSE	FALSE	FALSE	FALSE
pcodonTCTCTC	1343	0.0986913	0.000605627	0.895	0.886	0.8832	0.880625	43	0.202272	0.000201501	0.907	0.795	0.877036	0.778113	0.928077	MIC not significant	FALSE	FALSE	FALSE	FALSE	FALSE	FALSE	FALSE	FALSE
pcodonTCTCTA	1343	0.112341	0.0113547	0.106	0.728	0.103368	0.730574	51	0.206899	0.00932404	0.963	0.93	0.938992	0.908648	0.499135	MIC not significant	FALSE	FALSE	FALSE	FALSE	FALSE	FALSE	FALSE	FALSE
pcodonTCTCTG	1343	0.108828	0.00603072	0.312	0.638	0.327764	0.645225	81	0.244167	0.0160004	0.448	0.464	0.484513	0.51963	0.260476	MIC not significant	FALSE	FALSE	FALSE	FALSE	FALSE	FALSE	FALSE	FALSE
pcodonTCTCCT	1343	0.1159	0.00644038	0.158	0.424	0.151258	0.425223	140	0.222085	0.0044136	0.513	0.484	0.550483	0.511775	0.435459	MIC not significant	FALSE	FALSE	FALSE	FALSE	FALSE	FALSE	FALSE	FALSE
pcodonTCTCCC	1343	0.117313	0.00931385	0.018	0.234	0.0104447	0.242423	44	0.230224	0.0751509	0.691	0.962	0.725146	0.93407	0.0719907	MIC not significant	FALSE	FALSE	FALSE	FALSE	FALSE	FALSE	FALSE	FALSE
pcodonTCTCCG	1343	0.105839	0.00380339	0.455	0.649	0.491481	0.676657	74	0.241961	0.00181413	0.639	0.531	0.667782	0.562235	0.718607	MIC not significant	FALSE	FALSE	FALSE	FALSE	FALSE	FALSE	FALSE	FALSE
pcodonTCTCGT	1343	0.106272	0.00173019	0.405	0.458	0.423681	0.485163	54	0.310757	0.0253139	0.251	0.275	0.268742	0.306094	0.250495	MIC not significant	FALSE	FALSE	FALSE	FALSE	FALSE	FALSE	FALSE	FALSE
pcodonTCTATT	1343	0.125057	0.0193908	0.041	0.771	0.0316878	0.774294	201	0.228306	5.65715e-06	0.298	0.224	0.308271	0.230272	0.973268	MIC not significant	FALSE	FALSE	FALSE	FALSE	FALSE	FALSE	FALSE	FALSE
pcodonTCTATC	1343	0.123403	0.011298	0.004	0.106	0.00168683	0.105173	74	0.316447	0.0344779	0.104	0.19	0.0980409	0.205655	0.113214	MIC not significant	TRUE	FALSE	FALSE	FALSE	TRUE	FALSE	FALSE	FALSE
pcodonTCTATA	1343	0.115333	0.00711383	0.041	0.278	0.0439943	0.267122	70	0.302337	0.0518228	0.209	0.509	0.246956	0.549251	0.0580531	MIC not significant	FALSE	FALSE	FALSE	FALSE	FALSE	FALSE	FALSE	FALSE
pcodonTCTATG	1343	0.126205	0.0122684	0.01	0.228	0.00824829	0.234019	157	0.265843	0.000297648	0.081	0.045	0.0638852	0.0373657	0.830187	MIC not significant	FALSE	FALSE	FALSE	FALSE	FALSE	FALSE	FALSE	FALSE
pcodonTCTACT	1343	0.118977	0.00742198	0.04	0.237	0.0411136	0.23487	108	0.294258	0.000703958	0.105	0.062	0.0861822	0.0514618	0.785183	MIC not significant	FALSE	FALSE	FALSE	FALSE	FALSE	FALSE	FALSE	FALSE
pcodonTCTACC	1343	0.100431	0.00125961	0.842	0.869	0.832952	0.860697	41	0.198126	0.00264201	0.93	0.834	0.889058	0.817084	0.749608	MIC not significant	FALSE	FALSE	FALSE	FALSE	FALSE	FALSE	FALSE	FALSE
pcodonTCTACG	1343	0.108307	0.00243284	0.317	0.421	0.32674	0.43028	75	0.362142	0.0298668	0.01	0.02	0.00348542	0.0104796	0.138151	MIC not significant	FALSE	FALSE	FALSE	FALSE	FALSE	TRUE	FALSE	FALSE
pcodonTCTAAT	1343	0.111819	0.00457406	0.129	0.318	0.131961	0.322674	68	0.298749	0.0363792	0.271	0.458	0.31673	0.497389	0.119231	MIC not significant	FALSE	FALSE	FALSE	FALSE	FALSE	FALSE	FALSE	FALSE
pcodonTCTAAC	1343	0.101329	0.00176351	0.745	0.817	0.747592	0.808584	46	0.219135	0.0201372	0.704	0.683	0.718526	0.705182	0.345684	MIC not significant	FALSE	FALSE	FALSE	FALSE	FALSE	FALSE	FALSE	FALSE
pcodonTCTAAG	1343	0.119289	7.73769e-05	0.062	0.054	0.0591248	0.0486597	140	0.224122	0.00299456	0.53	0.442	0.548716	0.486809	0.520767	MIC not significant	FALSE	FALSE	FALSE	FALSE	FALSE	FALSE	FALSE	FALSE
pcodonTCTAGT	1343	0.109359	0.0061706	0.214	0.55	0.221965	0.566099	57	0.189888	0.00847769	0.972	0.948	0.934085	0.915709	0.495748	MIC not significant	FALSE	FALSE	FALSE	FALSE	FALSE	FALSE	FALSE	FALSE
pcodonTCTAGA	1343	0.112263	0.00364219	0.126	0.245	0.12834	0.250512	58	0.18224	0.000427325	0.98	0.931	0.952829	0.90587	0.877593	MIC not significant	FALSE	FALSE	FALSE	FALSE	FALSE	FALSE	FALSE	FALSE
pcodonTCTAGG	1343	0.104734	0.000774009	0.563	0.57	0.593247	0.59507	91	0.278052	0.00167401	0.245	0.191	0.274125	0.201008	0.700188	MIC not significant	FALSE	FALSE	FALSE	FALSE	FALSE	FALSE	FALSE	FALSE
pcodonTCTGTC	1343	0.098512	4.20587e-05	0.883	0.849	0.874481	0.848268	56	0.225746	0.00560234	0.818	0.744	0.812876	0.749027	0.583518	MIC not significant	FALSE	FALSE	FALSE	FALSE	FALSE	FALSE	FALSE	FALSE
pcodonTCTGTG	1343	0.112177	0.00396169	0.171	0.325	0.17652	0.330761	88	0.230802	0.0112795	0.754	0.766	0.766233	0.772256	0.324706	MIC not significant	FALSE	FALSE	FALSE	FALSE	FALSE	FALSE	FALSE	FALSE
pcodonTCTGCT	1343	0.122732	0.00852871	0.011	0.121	0.00843605	0.111446	103	0.28275	3.54996e-05	0.245	0.178	0.271914	0.185626	0.95237	MIC not significant	FALSE	FALSE	FALSE	FALSE	FALSE	FALSE	FALSE	FALSE
pcodonTCTGCC	1343	0.112525	0.00365778	0.088	0.203	0.0922343	0.207585	54	0.228046	0.00150278	0.858	0.752	0.847142	0.752604	0.780776	MIC not significant	FALSE	FALSE	FALSE	FALSE	FALSE	FALSE	FALSE	FALSE
pcodonTCTGCA	1343	0.117177	0.0148273	0.025	0.601	0.0129036	0.644621	42	0.358297	0.105529	0.087	0.437	0.0766856	0.47641	0.0363167	MIC not significant	FALSE	FALSE	FALSE	FALSE	FALSE	FALSE	FALSE	FALSE
pcodonTCTGCG	1343	0.117179	0.00519394	0.088	0.232	0.0876786	0.239075	113	0.195634	0.000101033	0.941	0.876	0.920913	0.872211	0.915849	MIC not significant	FALSE	FALSE	FALSE	FALSE	FALSE	FALSE	FALSE	FALSE
pcodonTCTGAA	1343	0.109425	0.00444799	0.228	0.426	0.233409	0.452391	64	0.279695	0.0137728	0.521	0.537	0.581622	0.566337	0.355719	MIC not significant	FALSE	FALSE	FALSE	FALSE	FALSE	FALSE	FALSE	FALSE
pcodonTCTGAG	1343	0.104563	0.000512503	0.479	0.445	0.519164	0.497374	42	0.240244	0.0415677	0.665	0.793	0.696358	0.7961	0.195292	MIC not significant	FALSE	FALSE	FALSE	FALSE	FALSE	FALSE	FALSE	FALSE
pcodonTCTGGT	1343	0.114653	0.0077074	0.186	0.559	0.20834	0.576606	140	0.344066	8.15219e-05	0.001	0.001	1.03822e-05	1.7731e-06	0.915681	MIC not significant	FALSE	TRUE	FALSE	FALSE	FALSE	TRUE	FALSE	FALSE
pcodonTCTGGC	1343	0.111108	0.000925271	0.205	0.208	0.20432	0.207962	72	0.278328	0.000132162	0.331	0.214	0.363541	0.235839	0.923644	MIC not significant	FALSE	FALSE	FALSE	FALSE	FALSE	FALSE	FALSE	FALSE
pcodonTCTGGA	1343	0.108629	0.00207277	0.373	0.452	0.390824	0.468141	102	0.33585	0.0036306	0.041	0.032	0.0246694	0.013958	0.547449	MIC not significant	FALSE	FALSE	FALSE	FALSE	FALSE	FALSE	FALSE	FALSE
pcodonTCTGGG	1343	0.111357	0.00393335	0.316	0.486	0.320573	0.503324	129	0.266896	0.0005534	0.17	0.126	0.176208	0.123133	0.7913	MIC not significant	FALSE	FALSE	FALSE	FALSE	FALSE	FALSE	FALSE	FALSE
pcodonTCCTTT	1343	0.100064	0.00136441	0.945	0.951	0.938108	0.946929	191	0.236355	0.0388524	0.099	0.597	0.10153	0.616875	0.00627412	MIC not significant	FALSE	FALSE	FALSE	FALSE	FALSE	FALSE	FALSE	FALSE
pcodonTCCTTC	1343	0.111678	0.000467627	0.348	0.327	0.348313	0.331802	141	0.249887	0.0462993	0.185	0.671	0.18267	0.684116	0.0103958	MIC not significant	FALSE	FALSE	FALSE	FALSE	FALSE	FALSE	FALSE	FALSE
pcodonTCCTTA	1343	0.139208	0.0263899	0.001	0.359	6.06208e-05	0.377844	191	0.198077	0.0419572	0.644	0.994	0.682778	0.982134	0.00447627	MIC not significant	TRUE	FALSE	FALSE	FALSE	TRUE	FALSE	FALSE	FALSE
pcodonTCCTTG	1343	0.113647	0.0017045	0.268	0.31	0.279544	0.326933	154	0.235489	0.0119257	0.385	0.45	0.420296	0.491565	0.177596	MIC not significant	FALSE	FALSE	FALSE	FALSE	FALSE	FALSE	FALSE	FALSE
pcodonTCCTCT	1343	0.0984158	0.000740514	0.892	0.898	0.887021	0.888549	93	0.278504	0.0129148	0.182	0.212	0.206704	0.222683	0.278084	MIC not significant	FALSE	FALSE	FALSE	FALSE	FALSE	FALSE	FALSE	FALSE
pcodonTCCTCC	1343	0.104574	0.00437145	0.619	0.8	0.632731	0.810528	99	0.353399	0.144735	0.009	0.696	0.000474966	0.705758	0.000102589	MIC not significant	FALSE	FALSE	FALSE	FALSE	FALSE	TRUE	FALSE	FALSE
pcodonTCCTCA	1343	0.0998916	0.000943579	0.812	0.813	0.81212	0.823753	63	0.280258	0.0119789	0.541	0.525	0.60141	0.571346	0.393165	MIC not significant	FALSE	FALSE	FALSE	FALSE	FALSE	FALSE	FALSE	FALSE
pcodonTCCTCG	1343	0.104357	0.0044509	0.717	0.88	0.727031	0.875053	129	0.206807	0.0106859	0.882	0.909	0.871119	0.890785	0.243701	MIC not significant	FALSE	FALSE	FALSE	FALSE	FALSE	FALSE	FALSE	FALSE
pcodonTCCTAT	1343	0.127734	0.0119217	0.007	0.08	0.00113924	0.0748359	98	0.371383	0.0989742	0.001	0.12	0.000139685	0.115041	0.00160524	non-significant monotone/non-monotone	FALSE	TRUE	FALSE	FALSE	TRUE	TRUE	FALSE	FALSE
pcodonTCCTAG	1343	0.0953892	7.01346e-05	0.969	0.963	0.953005	0.942219	54	0.282469	0.008148	0.435	0.357	0.485774	0.397918	0.516258	MIC not significant	FALSE	FALSE	FALSE	FALSE	FALSE	FALSE	FALSE	FALSE
pcodonTCCTGT	1343	0.109474	0.0010684	0.241	0.269	0.253195	0.270791	69	0.279947	0.00344095	0.396	0.309	0.461244	0.370492	0.632099	MIC not significant	FALSE	FALSE	FALSE	FALSE	FALSE	FALSE	FALSE	FALSE
pcodonTCCTGC	1343	0.119287	0.00610429	0.057	0.184	0.0459176	0.184665	113	0.319166	0.0342069	0.017	0.064	0.00822843	0.0512676	0.0498613	MIC not significant	FALSE	FALSE	FALSE	FALSE	FALSE	FALSE	FALSE	FALSE
pcodonTCCTGA	1343	0.105763	0.00168905	0.478	0.534	0.498248	0.556337	77	0.295508	0.0113538	0.147	0.136	0.1526	0.142222	0.356349	MIC not significant	FALSE	FALSE	FALSE	FALSE	FALSE	FALSE	FALSE	FALSE
pcodonTCCTGG	1343	0.121833	0.018305	0.062	0.801	0.0563038	0.801732	174	0.274872	0.0198441	0.038	0.099	0.0249839	0.0785234	0.0637314	MIC not significant	FALSE	FALSE	FALSE	FALSE	FALSE	FALSE	FALSE	FALSE
pcodonTCCCTT	1343	0.107344	0.000338717	0.417	0.389	0.428312	0.40493	88	0.268118	0.00385851	0.41	0.346	0.445247	0.371548	0.565337	MIC not significant	FALSE	FALSE	FALSE	FALSE	FALSE	FALSE	FALSE	FALSE
pcodonTCCCCT	1343	0.110108	0.00721517	0.29	0.673	0.297613	0.679472	99	0.252762	0.0177257	0.292	0.384	0.330891	0.417385	0.188934	MIC not significant	FALSE	FALSE	FALSE	FALSE	FALSE	FALSE	FALSE	FALSE
pcodonTCCCCG	1343	0.0978515	0.00019386	0.891	0.873	0.892209	0.874755	52	0.584006	0.000256284	0.000144737	9.21053e-05	1.50235e-08	1.10527e-09	0.910314	MIC not significant	FALSE	TRUE	FALSE	FALSE	FALSE	TRUE	FALSE	FALSE
pcodonTCCCGT	1343	0.116555	7.79764e-06	0.017	0.009	0.0116602	0.00754176	42	0.285714	0.0480434	0.358	0.532	0.420877	0.575629	0.162686	MIC not significant	FALSE	FALSE	FALSE	FALSE	FALSE	FALSE	FALSE	FALSE
pcodonTCCATT	1343	0.106585	0.000525918	0.615	0.608	0.624272	0.614269	136	0.202992	0.0342834	0.839	0.993	0.831824	0.970821	0.0309234	MIC not significant	FALSE	FALSE	FALSE	FALSE	FALSE	FALSE	FALSE	FALSE
pcodonTCCATC	1343	0.0993221	0.00131796	0.825	0.853	0.829157	0.852393	62	0.209915	0.0268924	0.817	0.879	0.817237	0.871774	0.2028	MIC not significant	FALSE	FALSE	FALSE	FALSE	FALSE	FALSE	FALSE	FALSE
pcodonTCCATA	1343	0.0971669	0.000474687	0.917	0.913	0.911464	0.903818	57	0.298365	0.0418196	0.212	0.379	0.250008	0.427204	0.12686	MIC not significant	FALSE	FALSE	FALSE	FALSE	FALSE	FALSE	FALSE	FALSE
pcodonTCCATG	1343	0.0993752	0.000623431	0.914	0.917	0.911986	0.910293	143	0.230054	0.0251055	0.361	0.635	0.387851	0.663948	0.058747	MIC not significant	FALSE	FALSE	FALSE	FALSE	FALSE	FALSE	FALSE	FALSE
pcodonTCCACT	1343	0.112882	0.000447443	0.134	0.129	0.13201	0.120648	73	0.300486	0.00757264	0.18	0.152	0.201632	0.155352	0.464129	MIC not significant	FALSE	FALSE	FALSE	FALSE	FALSE	FALSE	FALSE	FALSE
pcodonTCCACC	1343	0.113826	0.00150676	0.102	0.117	0.0903917	0.111355	67	0.365269	0.00051655	0.045	0.032	0.0434246	0.0190861	0.855146	MIC not significant	FALSE	FALSE	FALSE	FALSE	FALSE	FALSE	FALSE	FALSE
pcodonTCCACG	1343	0.12408	0.00712228	0.004	0.076	0.00643192	0.0609665	114	0.270691	0.0017569	0.168	0.126	0.173502	0.122153	0.657913	MIC not significant	TRUE	FALSE	FALSE	FALSE	TRUE	FALSE	FALSE	FALSE
pcodonTCCAAG	1343	0.137592	0.0377822	0.000144737	0.887605	1.49768e-05	0.883233	136	0.219624	0.0109682	0.635	0.688	0.656854	0.706356	0.224974	MIC not significant	TRUE	FALSE	FALSE	FALSE	TRUE	FALSE	FALSE	FALSE
pcodonTCCAGT	1343	0.12105	0.000286785	0.005	0.005	0.00178253	0.00121627	42	0.281773	0.0042447	0.352	0.248	0.399009	0.276396	0.681863	MIC not significant	TRUE	FALSE	FALSE	FALSE	TRUE	FALSE	FALSE	FALSE
pcodonTCCAGC	1343	0.106163	0.00828114	0.438	0.867	0.452991	0.860867	72	0.387403	0.177444	0.011	0.837	0.00246329	0.828241	0.000228859	MIC not significant	FALSE	FALSE	FALSE	FALSE	FALSE	TRUE	FALSE	FALSE
pcodonTCCAGG	1343	0.112047	0.00825061	0.287	0.676	0.284901	0.700407	122	0.229392	0.024878	0.413	0.66	0.446337	0.670067	0.0827226	MIC not significant	FALSE	FALSE	FALSE	FALSE	FALSE	FALSE	FALSE	FALSE
pcodonTCCGTC	1343	0.101637	0.00438497	0.71	0.903	0.729468	0.884821	63	0.382146	0.0854941	0.078	0.325	0.0439059	0.370405	0.0200506	MIC not significant	FALSE	FALSE	FALSE	FALSE	FALSE	FALSE	FALSE	FALSE
pcodonTCCGTG	1343	0.101228	6.25432e-06	0.741	0.696	0.753897	0.713745	56	0.312136	0.0470086	0.206	0.367	0.210112	0.394523	0.108417	MIC not significant	FALSE	FALSE	FALSE	FALSE	FALSE	FALSE	FALSE	FALSE
pcodonTCCGCT	1343	0.118982	0.0116418	0.019	0.297	0.0140165	0.322311	69	0.28418	0.0176099	0.397	0.421	0.432811	0.465868	0.277042	MIC not significant	FALSE	FALSE	FALSE	FALSE	FALSE	FALSE	FALSE	FALSE
pcodonTCCGCC	1343	0.105526	0.000802057	0.412	0.419	0.426182	0.432482	60	0.219018	0.000279804	0.799	0.668	0.802495	0.69263	0.899057	MIC not significant	FALSE	FALSE	FALSE	FALSE	FALSE	FALSE	FALSE	FALSE
pcodonTCCGCG	1343	0.106528	0.000398439	0.55	0.519	0.559107	0.540698	111	0.203462	0.0119568	0.904	0.915	0.888903	0.903246	0.253275	MIC not significant	FALSE	FALSE	FALSE	FALSE	FALSE	FALSE	FALSE	FALSE
pcodonTCCGAA	1343	0.108463	0.0053483	0.269	0.572	0.277805	0.600445	42	0.246705	0.000187561	0.627	0.448	0.66159	0.49823	0.931402	MIC not significant	FALSE	FALSE	FALSE	FALSE	FALSE	FALSE	FALSE	FALSE
pcodonTCCGGT	1343	0.116104	0.00175825	0.084	0.102	0.0693255	0.0913435	96	0.24122	0.00898688	0.492	0.472	0.534849	0.511897	0.35823	MIC not significant	FALSE	FALSE	FALSE	FALSE	FALSE	FALSE	FALSE	FALSE
pcodonTCCGGC	1343	0.115072	0.00536709	0.071	0.2	0.0644574	0.210776	73	0.317111	0.00518565	0.096	0.074	0.0997838	0.0707692	0.544891	MIC not significant	FALSE	FALSE	FALSE	FALSE	FALSE	FALSE	FALSE	FALSE
pcodonTCCGGA	1343	0.106547	0.00265246	0.471	0.595	0.48749	0.607242	91	0.281008	0.0378624	0.225	0.463	0.237995	0.501918	0.0645665	MIC not significant	FALSE	FALSE	FALSE	FALSE	FALSE	FALSE	FALSE	FALSE
pcodonTCCGGG	1343	0.10182	0.000386378	0.72	0.7	0.737217	0.71886	84	0.36175	0.0961589	0.036	0.387	0.0164451	0.431068	0.00409687	MIC not significant	FALSE	FALSE	FALSE	FALSE	FALSE	FALSE	FALSE	FALSE
pcodonTCATTT	1343	0.0952315	0.0071263	0.965	0.999	0.956686	0.996432	95	0.271327	0.00150783	0.215	0.155	0.229679	0.163685	0.708698	MIC not significant	FALSE	FALSE	FALSE	FALSE	FALSE	FALSE	FALSE	FALSE
pcodonTCATTC	1343	0.108079	0.00749565	0.311	0.738	0.317194	0.753477	55	0.269274	0.0055764	0.507	0.424	0.54727	0.456865	0.586958	MIC not significant	FALSE	FALSE	FALSE	FALSE	FALSE	FALSE	FALSE	FALSE
pcodonTCATTA	1343	0.111217	0.00319377	0.177	0.291	0.181712	0.295403	75	0.211779	0.0018885	0.883	0.794	0.870707	0.804755	0.711232	MIC not significant	FALSE	FALSE	FALSE	FALSE	FALSE	FALSE	FALSE	FALSE
pcodonTCATTG	1343	0.124943	0.015235	0.004	0.263	0.00264196	0.281792	93	0.236464	0.0154384	0.614	0.696	0.644988	0.69783	0.235372	MIC not significant	TRUE	FALSE	FALSE	FALSE	TRUE	FALSE	FALSE	FALSE
pcodonTCATCT	1343	0.102936	0.00662587	0.625	0.962	0.655534	0.934037	40	0.190366	0.00114049	0.967	0.895	0.935115	0.874051	0.835794	MIC not significant	FALSE	FALSE	FALSE	FALSE	FALSE	FALSE	FALSE	FALSE
pcodonTCATGG	1343	0.103142	0.00189837	0.602	0.695	0.629565	0.704159	50	0.269008	0.02186	0.689	0.696	0.708899	0.717344	0.304526	MIC not significant	FALSE	FALSE	FALSE	FALSE	FALSE	FALSE	FALSE	FALSE
pcodonTCACTT	1343	0.106021	0.00651187	0.422	0.787	0.452028	0.789161	66	0.363849	0.00838306	0.054	0.036	0.0444544	0.02992	0.464684	MIC not significant	FALSE	FALSE	FALSE	FALSE	FALSE	FALSE	FALSE	FALSE
pcodonTCACCT	1343	0.114213	0.00776361	0.053	0.315	0.0409364	0.352805	41	0.300769	0.00121405	0.274	0.17	0.33576	0.19695	0.828423	MIC not significant	FALSE	FALSE	FALSE	FALSE	FALSE	FALSE	FALSE	FALSE
pcodonTCACCG	1343	0.115773	0.0031509	0.024	0.056	0.0155724	0.0461605	41	0.32906	0.000474238	0.177	0.099	0.197161	0.088935	0.892429	MIC not significant	FALSE	FALSE	FALSE	FALSE	FALSE	FALSE	FALSE	FALSE
pcodonTCACGT	1343	0.109519	0.0102527	0.185	0.829	0.198525	0.82122	45	0.275114	0.0074473	0.312	0.229	0.371129	0.265995	0.571833	MIC not significant	FALSE	FALSE	FALSE	FALSE	FALSE	FALSE	FALSE	FALSE
pcodonTCAATT	1343	0.113278	0.00849399	0.135	0.498	0.122753	0.517532	82	0.317309	0.00207462	0.164	0.12	0.17729	0.122631	0.683931	MIC not significant	FALSE	FALSE	FALSE	FALSE	FALSE	FALSE	FALSE	FALSE
pcodonTCAATA	1343	0.10752	0.00217235	0.334	0.417	0.341479	0.439927	47	0.316141	0.0382616	0.398	0.526	0.457312	0.569027	0.187616	MIC not significant	FALSE	FALSE	FALSE	FALSE	FALSE	FALSE	FALSE	FALSE
pcodonTCAATG	1343	0.109441	0.00615867	0.273	0.602	0.283155	0.617084	77	0.253572	0.00318291	0.458	0.367	0.500232	0.403014	0.625324	MIC not significant	FALSE	FALSE	FALSE	FALSE	FALSE	FALSE	FALSE	FALSE
pcodonTCAACT	1343	0.113726	0.00563576	0.064	0.214	0.0516776	0.239324	40	0.24119	0.00458733	0.738	0.616	0.758735	0.654739	0.677007	MIC not significant	FALSE	FALSE	FALSE	FALSE	FALSE	FALSE	FALSE	FALSE
pcodonTCAAAG	1343	0.103188	0.00223383	0.608	0.712	0.638529	0.732816	49	0.393449	0.0327315	0.057	0.076	0.0420845	0.0646402	0.212815	MIC not significant	FALSE	FALSE	FALSE	FALSE	FALSE	FALSE	FALSE	FALSE
pcodonTCAAGG	1343	0.111675	0.00282908	0.111	0.196	0.106668	0.191855	44	0.185203	0.00172878	0.945	0.88	0.91026	0.855679	0.788194	MIC not significant	FALSE	FALSE	FALSE	FALSE	FALSE	FALSE	FALSE	FALSE
pcodonTCAGCG	1343	0.11906	0.00461164	0.006	0.037	0.00398518	0.0245102	43	0.358938	0.0677843	0.049	0.176	0.044239	0.189936	0.0917637	non-significant monotone/non-monotone	TRUE	FALSE	FALSE	FALSE	TRUE	FALSE	FALSE	FALSE
pcodonTCAGGT	1343	0.109352	0.00202973	0.214	0.27	0.222702	0.290382	54	0.242189	0.000576725	0.746	0.578	0.752269	0.631037	0.863147	MIC not significant	FALSE	FALSE	FALSE	FALSE	FALSE	FALSE	FALSE	FALSE
pcodonTCAGGA	1343	0.112135	0.00242629	0.114	0.178	0.10281	0.164734	50	0.471873	0.0117878	0.006	0.004	0.00140811	0.000654789	0.451771	MIC not significant	FALSE	FALSE	FALSE	FALSE	FALSE	TRUE	FALSE	FALSE
pcodonTCAGGG	1343	0.118416	0.0135105	0.027	0.441	0.0149068	0.462085	65	0.278548	0.00044844	0.527	0.397	0.570707	0.438076	0.867027	MIC not significant	FALSE	FALSE	FALSE	FALSE	FALSE	FALSE	FALSE	FALSE
pcodonTCGTTT	1343	0.10894	2.89275e-05	0.604	0.566	0.619287	0.578235	183	0.204614	0.00166614	0.694	0.628	0.717374	0.660238	0.583263	MIC not significant	FALSE	FALSE	FALSE	FALSE	FALSE	FALSE	FALSE	FALSE
pcodonTCGTTC	1343	0.103979	0.000153538	0.663	0.629	0.674624	0.64499	109	0.28153	0.00730994	0.158	0.147	0.172277	0.156698	0.37672	MIC not significant	FALSE	FALSE	FALSE	FALSE	FALSE	FALSE	FALSE	FALSE
pcodonTCGTTA	1343	0.120703	0.00301453	0.086	0.127	0.0750711	0.126339	158	0.224695	0.0117647	0.457	0.544	0.508126	0.587523	0.17492	MIC not significant	FALSE	FALSE	FALSE	FALSE	FALSE	FALSE	FALSE	FALSE
pcodonTCGTTG	1343	0.119337	0.0162818	0.086	0.793	0.0773913	0.805221	152	0.25008	0.00179855	0.248	0.205	0.259728	0.20556	0.603918	MIC not significant	FALSE	FALSE	FALSE	FALSE	FALSE	FALSE	FALSE	FALSE
pcodonTCGTCT	1343	0.122267	0.00190714	0.025	0.031	0.0171199	0.0249221	117	0.228539	0.00287235	0.547	0.467	0.581742	0.514722	0.566035	MIC not significant	FALSE	FALSE	FALSE	FALSE	FALSE	FALSE	FALSE	FALSE
pcodonTCGTCC	1343	0.104194	0.00120358	0.604	0.624	0.615528	0.642481	79	0.309759	1.29803e-05	0.064	0.037	0.0534761	0.0246243	0.974861	MIC not significant	FALSE	FALSE	FALSE	FALSE	FALSE	FALSE	FALSE	FALSE
pcodonTCGTCA	1343	0.120273	0.00548641	0.003	0.037	0.00218465	0.0238385	47	0.308962	0.00638484	0.483	0.39	0.531129	0.423407	0.593406	MIC not significant	TRUE	FALSE	FALSE	FALSE	TRUE	FALSE	FALSE	FALSE
pcodonTCGTCG	1343	0.117321	0.000389004	0.12	0.107	0.116698	0.105161	144	0.184496	0.0059783	0.922	0.915	0.903157	0.899889	0.356984	MIC not significant	FALSE	FALSE	FALSE	FALSE	FALSE	FALSE	FALSE	FALSE
pcodonTCGTAT	1343	0.109368	2.18837e-05	0.323	0.288	0.343731	0.305836	99	0.18936	0.000429992	0.94	0.888	0.917275	0.873685	0.838569	MIC not significant	FALSE	FALSE	FALSE	FALSE	FALSE	FALSE	FALSE	FALSE
pcodonTCGTAG	1343	0.101901	0.00290062	0.686	0.807	0.695422	0.805416	60	0.201002	0.00052674	0.905	0.823	0.886592	0.807578	0.86156	MIC not significant	FALSE	FALSE	FALSE	FALSE	FALSE	FALSE	FALSE	FALSE
pcodonTCGTGT	1343	0.0990294	0.00465037	0.847	0.96	0.837785	0.943537	75	0.237745	0.000802935	0.662	0.534	0.681436	0.573458	0.809304	MIC not significant	FALSE	FALSE	FALSE	FALSE	FALSE	FALSE	FALSE	FALSE
pcodonTCGTGC	1343	0.102922	0.00036139	0.703	0.674	0.711795	0.695082	99	0.32556	0.124109	0.022	0.763	0.00803879	0.781958	0.000348757	MIC not significant	FALSE	FALSE	FALSE	FALSE	FALSE	FALSE	FALSE	FALSE
pcodonTCGTGA	1343	0.111816	0.000785927	0.193	0.195	0.187276	0.188779	82	0.412458	0.0089288	0.007	0.004	0.000626308	0.000325871	0.398435	MIC not significant	FALSE	FALSE	FALSE	FALSE	FALSE	TRUE	FALSE	FALSE
pcodonTCGTGG	1343	0.101624	0.00116599	0.874	0.89	0.864272	0.878021	154	0.234601	3.38246e-07	0.383	0.305	0.418301	0.331307	0.994288	MIC not significant	FALSE	FALSE	FALSE	FALSE	FALSE	FALSE	FALSE	FALSE
pcodonTCGCTT	1343	0.118503	0.0027482	0.147	0.207	0.135798	0.206826	186	0.302569	0.0641265	0.001	0.113	0.000137206	0.1075	0.000487815	MIC not significant	FALSE	TRUE	FALSE	FALSE	FALSE	TRUE	FALSE	FALSE
pcodonTCGCTC	1343	0.106665	0.000146166	0.372	0.324	0.386318	0.34684	51	0.355347	0.00272216	0.137	0.093	0.14054	0.0820206	0.716149	MIC not significant	FALSE	FALSE	FALSE	FALSE	FALSE	FALSE	FALSE	FALSE
pcodonTCGCTA	1343	0.111294	0.00550931	0.177	0.412	0.179004	0.431042	68	0.285873	0.0106384	0.404	0.377	0.438597	0.408708	0.402591	MIC not significant	FALSE	FALSE	FALSE	FALSE	FALSE	FALSE	FALSE	FALSE
pcodonTCGCTG	1343	0.105661	0.00144023	0.45	0.495	0.468912	0.510878	68	0.286414	0.00441666	0.384	0.31	0.432513	0.349242	0.589446	MIC not significant	FALSE	FALSE	FALSE	FALSE	FALSE	FALSE	FALSE	FALSE
pcodonTCGCCT	1343	0.118714	0.00255413	0.089	0.141	0.0935584	0.14572	162	0.253518	0.0573945	0.108	0.77	0.118498	0.768774	0.00213717	MIC not significant	FALSE	FALSE	FALSE	FALSE	FALSE	FALSE	FALSE	FALSE
pcodonTCGCCA	1343	0.119562	0.0098196	0.009	0.138	0.00321412	0.146102	49	0.305734	0.0296889	0.427	0.474	0.453802	0.525959	0.236462	MIC not significant	FALSE	FALSE	FALSE	FALSE	TRUE	FALSE	FALSE	FALSE
pcodonTCGCCG	1343	0.115557	0.000913385	0.105	0.102	0.0984158	0.101281	102	0.311847	0.000518005	0.083	0.052	0.068938	0.0413467	0.820378	MIC not significant	FALSE	FALSE	FALSE	FALSE	FALSE	FALSE	FALSE	FALSE
pcodonTCGCGT	1343	0.0978201	7.82668e-05	0.884	0.865	0.871274	0.850024	70	0.32675	0.00481777	0.113	0.076	0.113493	0.0721386	0.568027	MIC not significant	FALSE	FALSE	FALSE	FALSE	FALSE	FALSE	FALSE	FALSE
pcodonTCGCGA	1343	0.108555	0.00426513	0.266	0.475	0.277449	0.512298	55	0.319406	0.0827111	0.209	0.648	0.209068	0.665806	0.0332475	MIC not significant	FALSE	FALSE	FALSE	FALSE	FALSE	FALSE	FALSE	FALSE
pcodonTCGCGG	1343	0.114194	0.00396643	0.081	0.172	0.0713967	0.171364	65	0.26988	0.00167188	0.594	0.472	0.630697	0.514181	0.746397	MIC not significant	FALSE	FALSE	FALSE	FALSE	FALSE	FALSE	FALSE	FALSE
pcodonTCGATT	1343	0.120561	0.0155764	0.166	0.861	0.164032	0.863965	267	0.224677	0.0413263	0.072	0.678	0.0713157	0.681171	0.000834364	MIC not significant	FALSE	FALSE	FALSE	FALSE	FALSE	FALSE	FALSE	FALSE
pcodonTCGATC	1343	0.107852	0.00130054	0.431	0.465	0.460597	0.493791	104	0.277269	0.000453496	0.274	0.197	0.288608	0.203714	0.830102	MIC not significant	FALSE	FALSE	FALSE	FALSE	FALSE	FALSE	FALSE	FALSE
pcodonTCGATA	1343	0.111581	0.000838662	0.218	0.219	0.224159	0.229795	98	0.228862	0.00364306	0.609	0.541	0.626224	0.559797	0.554933	MIC not significant	FALSE	FALSE	FALSE	FALSE	FALSE	FALSE	FALSE	FALSE
pcodonTCGATG	1343	0.125148	0.00067039	0.039	0.035	0.0332365	0.0317429	205	0.283628	3.7786e-05	0.007	0.001	0.00140183	0.000594803	0.930294	Non-monotone	FALSE	FALSE	FALSE	FALSE	FALSE	TRUE	FALSE	FALSE
pcodonTCGACT	1343	0.12727	0.0082049	0.004	0.055	0.00270645	0.0466224	127	0.239022	0.00090349	0.539	0.441	0.577331	0.490243	0.737275	MIC not significant	TRUE	FALSE	FALSE	FALSE	TRUE	FALSE	FALSE	FALSE
pcodonTCGACC	1343	0.107246	0.00294847	0.524	0.66	0.545147	0.673627	127	0.285274	0.00386612	0.113	0.093	0.105391	0.0799299	0.487396	MIC not significant	FALSE	FALSE	FALSE	FALSE	FALSE	FALSE	FALSE	FALSE
pcodonTCGACA	1343	0.0962731	0.000312382	0.959	0.951	0.943916	0.936281	51	0.337026	0.0382105	0.202	0.301	0.209097	0.32028	0.168804	MIC not significant	FALSE	FALSE	FALSE	FALSE	FALSE	FALSE	FALSE	FALSE
pcodonTCGACG	1343	0.119855	0.0145334	0.114	0.767	0.117125	0.773045	194	0.194723	0.00299083	0.717	0.684	0.723479	0.695063	0.44883	MIC not significant	FALSE	FALSE	FALSE	FALSE	FALSE	FALSE	FALSE	FALSE
pcodonTCGAAT	1343	0.106783	0.0047925	0.378	0.645	0.39286	0.654595	66	0.302821	0.00912092	0.31	0.26	0.335567	0.288373	0.445585	MIC not significant	FALSE	FALSE	FALSE	FALSE	FALSE	FALSE	FALSE	FALSE
pcodonTCGAAC	1343	0.100292	0.000888555	0.787	0.799	0.793736	0.803645	57	0.362046	0.00479671	0.049	0.03	0.0285269	0.0139669	0.608707	MIC not significant	FALSE	FALSE	FALSE	FALSE	FALSE	FALSE	FALSE	FALSE
pcodonTCGAAA	1343	0.108089	0.000683383	0.273	0.266	0.289762	0.28216	46	0.20265	0.00102849	0.807	0.677	0.812986	0.697139	0.832436	MIC not significant	FALSE	FALSE	FALSE	FALSE	FALSE	FALSE	FALSE	FALSE
pcodonTCGAAG	1343	0.135603	0.0245892	0.003	0.579	0.000935339	0.596407	260	0.219952	0.0470564	0.17	0.913	0.181997	0.902034	0.000426699	MIC not significant	TRUE	FALSE	FALSE	FALSE	TRUE	FALSE	FALSE	FALSE
pcodonTCGAGT	1343	0.116217	0.00293541	0.075	0.118	0.0670679	0.122305	93	0.267639	1.38941e-06	0.29	0.206	0.311894	0.211825	0.991053	MIC not significant	FALSE	FALSE	FALSE	FALSE	FALSE	FALSE	FALSE	FALSE
pcodonTCGAGC	1343	0.11292	0.00761257	0.209	0.554	0.219485	0.576246	104	0.302639	0.0345623	0.1	0.257	0.0951858	0.281694	0.0588244	MIC not significant	FALSE	FALSE	FALSE	FALSE	FALSE	FALSE	FALSE	FALSE
pcodonTCGAGA	1343	0.0980622	0.000501125	0.897	0.894	0.888903	0.885158	92	0.278222	0.00215291	0.22	0.164	0.240724	0.169272	0.660517	MIC not significant	FALSE	FALSE	FALSE	FALSE	FALSE	FALSE	FALSE	FALSE
pcodonTCGAGG	1343	0.121305	0.0113662	0.087	0.547	0.0894369	0.565675	202	0.258004	0.0452017	0.04	0.443	0.0337871	0.472362	0.0023834	MIC not significant	FALSE	FALSE	FALSE	FALSE	FALSE	FALSE	FALSE	FALSE
pcodonTCGGTC	1343	0.111262	0.00362047	0.219	0.388	0.22638	0.376093	87	0.290118	0.0371799	0.242	0.458	0.258349	0.502233	0.0735614	MIC not significant	FALSE	FALSE	FALSE	FALSE	FALSE	FALSE	FALSE	FALSE
pcodonTCGGTG	1343	0.111635	0.000263066	0.252	0.224	0.256516	0.231521	113	0.287968	0.00918392	0.077	0.076	0.0750244	0.072627	0.312631	MIC not significant	FALSE	FALSE	FALSE	FALSE	FALSE	FALSE	FALSE	FALSE
pcodonTCGGCT	1343	0.116228	0.00382976	0.115	0.204	0.0994214	0.206547	118	0.207	9.87509e-05	0.828	0.712	0.815017	0.725522	0.914947	MIC not significant	FALSE	FALSE	FALSE	FALSE	FALSE	FALSE	FALSE	FALSE
pcodonTCGGCC	1343	0.12447	0.00419308	0.009	0.035	0.0101991	0.0335781	128	0.276858	0.0234486	0.16	0.279	0.14915	0.296374	0.0844089	MIC not significant	FALSE	FALSE	FALSE	FALSE	FALSE	FALSE	FALSE	FALSE
pcodonTCGGCA	1343	0.105313	0.0078291	0.454	0.874	0.482912	0.86914	62	0.22939	0.000284682	0.632	0.515	0.666208	0.543661	0.89644	MIC not significant	FALSE	FALSE	FALSE	FALSE	FALSE	FALSE	FALSE	FALSE
pcodonTCGGCG	1343	0.109618	0.00527936	0.563	0.8	0.574913	0.795228	179	0.191154	0.0144279	0.908	0.958	0.896999	0.94905	0.109246	MIC not significant	FALSE	FALSE	FALSE	FALSE	FALSE	FALSE	FALSE	FALSE
pcodonTCGGAA	1343	0.0999702	0.00222735	0.779	0.845	0.790286	0.860232	57	0.215931	0.000598727	0.867	0.747	0.849853	0.749132	0.856626	MIC not significant	FALSE	FALSE	FALSE	FALSE	FALSE	FALSE	FALSE	FALSE
pcodonTCGGAG	1343	0.112641	6.94742e-05	0.075	0.055	0.0675976	0.0486007	43	0.273847	0.0131566	0.406	0.322	0.446454	0.356137	0.463918	MIC not significant	FALSE	FALSE	FALSE	FALSE	FALSE	FALSE	FALSE	FALSE
pcodonTCGGGT	1343	0.107159	0.00109333	0.769	0.774	0.778021	0.791271	223	0.162226	0.00707968	0.983	0.984	0.961407	0.971395	0.210697	MIC not significant	FALSE	FALSE	FALSE	FALSE	FALSE	FALSE	FALSE	FALSE
pcodonTCGGGC	1343	0.11541	0.0084939	0.19	0.593	0.195488	0.598649	152	0.26252	0.0378043	0.146	0.484	0.144403	0.515764	0.0163817	MIC not significant	FALSE	FALSE	FALSE	FALSE	FALSE	FALSE	FALSE	FALSE
pcodonTCGGGA	1343	0.123547	0.0134393	0.096	0.635	0.090408	0.648531	289	0.179191	0.0373813	0.608	0.995	0.641344	0.987315	0.000953826	MIC not significant	FALSE	FALSE	FALSE	FALSE	FALSE	FALSE	FALSE	FALSE
pcodonTCGGGG	1343	0.10176	0.000698463	0.888	0.877	0.879223	0.87847	156	0.237775	0.0249672	0.35	0.592	0.36243	0.632159	0.0488307	MIC not significant	FALSE	FALSE	FALSE	FALSE	FALSE	FALSE	FALSE	FALSE
pcodonTATTTT	1343	0.125468	0.00508882	0.044	0.133	0.0392931	0.128178	259	0.185708	1.17722e-05	0.777	0.705	0.783098	0.725493	0.956178	MIC not significant	FALSE	FALSE	FALSE	FALSE	FALSE	FALSE	FALSE	FALSE
pcodonTATTTC	1343	0.114069	0.00155471	0.409	0.443	0.40647	0.452025	222	0.226898	0.0654695	0.093	0.977	0.0898333	0.958764	0.000115621	MIC not significant	FALSE	FALSE	FALSE	FALSE	FALSE	FALSE	FALSE	FALSE
pcodonTATTTA	1343	0.136219	0.00785411	0.002	0.031	0.00134158	0.021406	294	0.243008	0.046148	0.008	0.314	0.00252603	0.336036	0.000206332	non-significant monotone/non-monotone	TRUE	FALSE	FALSE	FALSE	TRUE	TRUE	FALSE	FALSE
pcodonTATTTG	1343	0.119915	0.00899436	0.128	0.489	0.126883	0.499364	209	0.222993	0.000166164	0.265	0.197	0.278882	0.206954	0.853037	MIC not significant	FALSE	FALSE	FALSE	FALSE	FALSE	FALSE	FALSE	FALSE
pcodonTATTCT	1343	0.106339	0.00294205	0.616	0.731	0.625926	0.743926	130	0.209077	0.00490463	0.845	0.829	0.838531	0.820673	0.428501	MIC not significant	FALSE	FALSE	FALSE	FALSE	FALSE	FALSE	FALSE	FALSE
pcodonTATTCC	1343	0.116513	0.00881267	0.08	0.389	0.0774018	0.405989	103	0.25346	0.0260552	0.546	0.73	0.57859	0.74677	0.103333	MIC not significant	FALSE	FALSE	FALSE	FALSE	FALSE	FALSE	FALSE	FALSE
pcodonTATTCG	1343	0.117717	0.00745681	0.119	0.4	0.118101	0.416234	157	0.242251	0.0565708	0.241	0.915	0.247932	0.895389	0.00270372	MIC not significant	FALSE	FALSE	FALSE	FALSE	FALSE	FALSE	FALSE	FALSE
pcodonTATTAT	1343	0.118832	5.38453e-06	0.239	0.21	0.25188	0.218591	286	0.216278	0.0110087	0.063	0.108	0.0495915	0.104361	0.0764749	MIC not significant	FALSE	FALSE	FALSE	FALSE	FALSE	FALSE	FALSE	FALSE
pcodonTATTAC	1343	0.127947	0.0194985	0.001	0.231	0.000121871	0.251116	67	0.259956	0.0110331	0.631	0.615	0.676208	0.647039	0.397586	MIC not significant	TRUE	FALSE	FALSE	FALSE	TRUE	FALSE	FALSE	FALSE
pcodonTATTAA	1343	0.127558	0.0135856	0.002	0.097	0.000552663	0.0916051	89	0.258527	0.0267246	0.426	0.627	0.492415	0.657961	0.125831	MIC not significant	TRUE	FALSE	FALSE	FALSE	TRUE	FALSE	FALSE	FALSE
pcodonTATTAG	1343	0.103471	0.00642654	0.672	0.917	0.67245	0.912471	96	0.288144	0.00968556	0.119	0.117	0.109262	0.10429	0.340106	MIC not significant	FALSE	FALSE	FALSE	FALSE	FALSE	FALSE	FALSE	FALSE
pcodonTATTGT	1343	0.109211	0.00496989	0.379	0.633	0.40274	0.654668	115	0.249577	0.0126998	0.339	0.368	0.36434	0.408432	0.23048	MIC not significant	FALSE	FALSE	FALSE	FALSE	FALSE	FALSE	FALSE	FALSE
pcodonTATTGC	1343	0.117113	0.00640231	0.106	0.301	0.100038	0.319979	137	0.291717	0.0340456	0.029	0.127	0.0172932	0.113852	0.0308915	MIC not significant	FALSE	FALSE	FALSE	FALSE	FALSE	FALSE	FALSE	FALSE
pcodonTATTGA	1343	0.108505	0.00320417	0.522	0.658	0.53811	0.6728	136	0.225469	0.0256446	0.522	0.783	0.568892	0.793035	0.0625566	MIC not significant	FALSE	FALSE	FALSE	FALSE	FALSE	FALSE	FALSE	FALSE
pcodonTATTGG	1343	0.121309	0.00399893	0.126	0.244	0.128242	0.246609	261	0.188722	0.0215562	0.714	0.959	0.728316	0.936665	0.017623	MIC not significant	FALSE	FALSE	FALSE	FALSE	FALSE	FALSE	FALSE	FALSE
pcodonTATCTT	1343	0.110852	0.000164945	0.555	0.523	0.551001	0.520586	214	0.178879	0.00069847	0.916	0.884	0.909825	0.877526	0.700667	MIC not significant	FALSE	FALSE	FALSE	FALSE	FALSE	FALSE	FALSE	FALSE
pcodonTATCTC	1343	0.10952	4.80612e-06	0.21	0.186	0.216449	0.176352	54	0.283066	0.0193578	0.417	0.441	0.464729	0.482006	0.315679	MIC not significant	FALSE	FALSE	FALSE	FALSE	FALSE	FALSE	FALSE	FALSE
pcodonTATCTA	1343	0.0985872	0.00147762	0.869	0.884	0.866003	0.889257	76	0.309805	0.00114757	0.101	0.065	0.0893011	0.0483842	0.771425	MIC not significant	FALSE	FALSE	FALSE	FALSE	FALSE	FALSE	FALSE	FALSE
pcodonTATCTG	1343	0.111369	9.43046e-05	0.185	0.15	0.18174	0.153512	75	0.249701	0.00546942	0.521	0.446	0.567162	0.488784	0.528315	MIC not significant	FALSE	FALSE	FALSE	FALSE	FALSE	FALSE	FALSE	FALSE
pcodonTATCCT	1343	0.11777	0.00869819	0.105	0.421	0.101103	0.450187	138	0.223129	0.0252776	0.539	0.778	0.582025	0.798809	0.0625213	MIC not significant	FALSE	FALSE	FALSE	FALSE	FALSE	FALSE	FALSE	FALSE
pcodonTATCCG	1343	0.111448	0.00338745	0.243	0.355	0.244002	0.383314	96	0.212033	0.0108674	0.799	0.808	0.799396	0.808299	0.31212	MIC not significant	FALSE	FALSE	FALSE	FALSE	FALSE	FALSE	FALSE	FALSE
pcodonTATCAG	1343	0.11201	5.19297e-05	0.134	0.114	0.128089	0.105464	64	0.346249	0.00490151	0.129	0.091	0.119293	0.0761833	0.58251	MIC not significant	FALSE	FALSE	FALSE	FALSE	FALSE	FALSE	FALSE	FALSE
pcodonTATCGT	1343	0.104553	0.00146864	0.614	0.646	0.629837	0.666552	102	0.246269	0.00479259	0.641	0.6	0.674099	0.621605	0.489322	MIC not significant	FALSE	FALSE	FALSE	FALSE	FALSE	FALSE	FALSE	FALSE
pcodonTATCGA	1343	0.104447	0.000732601	0.521	0.512	0.53819	0.537705	68	0.312052	0.000233737	0.211	0.134	0.212452	0.130352	0.90152	MIC not significant	FALSE	FALSE	FALSE	FALSE	FALSE	FALSE	FALSE	FALSE
pcodonTATCGG	1343	0.115825	0.00327255	0.041	0.083	0.0320818	0.0768024	53	0.30261	0.0627725	0.323	0.647	0.354783	0.673957	0.0703768	MIC not significant	FALSE	FALSE	FALSE	FALSE	FALSE	FALSE	FALSE	FALSE
pcodonTATATT	1343	0.115048	0.0031813	0.48	0.607	0.490578	0.620518	328	0.205824	0.0250295	0.108	0.549	0.11641	0.565288	0.0040733	MIC not significant	FALSE	FALSE	FALSE	FALSE	FALSE	FALSE	FALSE	FALSE
pcodonTATATC	1343	0.110381	0.00319157	0.475	0.613	0.49256	0.629344	172	0.185397	0.0435634	0.858632	0.999329	0.851345	0.995204	0.00600176	MIC not significant	FALSE	FALSE	FALSE	FALSE	FALSE	FALSE	FALSE	FALSE
pcodonTATATA	1343	0.112065	0.000317488	0.304	0.287	0.307475	0.285513	138	0.26005	0.000989724	0.117	0.087	0.127234	0.0830562	0.714142	MIC not significant	FALSE	FALSE	FALSE	FALSE	FALSE	FALSE	FALSE	FALSE
pcodonTATATG	1343	0.1084	0.00121399	0.667	0.698	0.686091	0.711158	212	0.196706	0.000800686	0.673	0.601	0.690184	0.622895	0.682064	MIC not significant	FALSE	FALSE	FALSE	FALSE	FALSE	FALSE	FALSE	FALSE
pcodonTATACT	1343	0.110809	0.00569432	0.282	0.554	0.296771	0.58496	114	0.242968	0.00852374	0.446	0.423	0.474347	0.464672	0.328581	MIC not significant	FALSE	FALSE	FALSE	FALSE	FALSE	FALSE	FALSE	FALSE
pcodonTATACC	1343	0.105598	0.00444063	0.565	0.769	0.583384	0.778223	102	0.27478	0.0195354	0.338	0.414	0.368048	0.468455	0.161188	MIC not significant	FALSE	FALSE	FALSE	FALSE	FALSE	FALSE	FALSE	FALSE
pcodonTATACG	1343	0.136516	0.0136804	0.001	0.031	0.0001189	0.03068	182	0.270904	0.0520708	0.022	0.366	0.0140271	0.396286	0.00194682	non-significant monotone/non-monotone	TRUE	FALSE	FALSE	FALSE	TRUE	FALSE	FALSE	FALSE
pcodonTATAAT	1343	0.101588	0.00172714	0.709	0.774	0.72005	0.775278	66	0.435699	0.0170709	0.005	0.005	0.000645641	0.000537751	0.295717	MIC not significant	FALSE	FALSE	FALSE	FALSE	FALSE	TRUE	FALSE	FALSE
pcodonTATAAC	1343	0.109493	5.28011e-05	0.26	0.231	0.274887	0.236795	76	0.234182	0.000486831	0.65	0.517	0.67362	0.558824	0.849679	MIC not significant	FALSE	FALSE	FALSE	FALSE	FALSE	FALSE	FALSE	FALSE
pcodonTATAAG	1343	0.143212	0.0450803	6.57895e-05	0.975145	5.68148e-06	0.96726	218	0.188534	0.0495945	0.755	0.999	0.763106	0.998075	0.000930059	MIC not significant	TRUE	FALSE	FALSE	FALSE	TRUE	FALSE	FALSE	FALSE
pcodonTATAGT	1343	0.105223	0.00517311	0.495	0.767	0.509822	0.777776	74	0.205496	0.000839961	0.918	0.848	0.893072	0.830464	0.806363	MIC not significant	FALSE	FALSE	FALSE	FALSE	FALSE	FALSE	FALSE	FALSE
pcodonTATAGC	1343	0.100611	0.000160401	0.829	0.81	0.828275	0.807039	98	0.217113	0.0189721	0.74	0.822	0.752509	0.822546	0.176212	MIC not significant	FALSE	FALSE	FALSE	FALSE	FALSE	FALSE	FALSE	FALSE
pcodonTATAGA	1343	0.105679	0.000724286	0.466	0.458	0.481257	0.473965	69	0.304006	0.0377753	0.234	0.385	0.250742	0.436836	0.109538	MIC not significant	FALSE	FALSE	FALSE	FALSE	FALSE	FALSE	FALSE	FALSE
pcodonTATAGG	1343	0.111412	0.00627883	0.39	0.718	0.420702	0.725013	157	0.226376	0.0731963	0.475908	0.999105	0.512536	0.994491	0.000610269	MIC not significant	FALSE	FALSE	FALSE	FALSE	FALSE	FALSE	FALSE	FALSE
pcodonTATGTC	1343	0.113375	0.000545218	0.19	0.183	0.189799	0.18014	114	0.266298	0.0930933	0.199	0.992	0.213769	0.963662	0.000963819	MIC not significant	FALSE	FALSE	FALSE	FALSE	FALSE	FALSE	FALSE	FALSE
pcodonTATGTG	1343	0.108347	0.0060304	0.388	0.717	0.417728	0.72826	102	0.263791	0.00109909	0.457	0.352	0.491456	0.39508	0.740805	MIC not significant	FALSE	FALSE	FALSE	FALSE	FALSE	FALSE	FALSE	FALSE
pcodonTATGCT	1343	0.107296	0.00651482	0.535	0.817	0.54001	0.823947	120	0.220949	0.00130801	0.595	0.508	0.626264	0.542395	0.694937	MIC not significant	FALSE	FALSE	FALSE	FALSE	FALSE	FALSE	FALSE	FALSE
pcodonTATGCC	1343	0.122426	0.00523528	0.008	0.03	0.00446526	0.0268456	78	0.23674	0.0246047	0.559	0.704	0.611519	0.718723	0.170226	MIC not significant	FALSE	FALSE	FALSE	FALSE	TRUE	FALSE	FALSE	FALSE
pcodonTATGCA	1343	0.101191	0.000935749	0.737	0.742	0.747769	0.759226	49	0.280939	0.00361858	0.614	0.485	0.649793	0.533356	0.681378	MIC not significant	FALSE	FALSE	FALSE	FALSE	FALSE	FALSE	FALSE	FALSE
pcodonTATGCG	1343	0.111651	0.000472822	0.384	0.362	0.405345	0.389649	165	0.26717	0.0597744	0.03	0.53	0.0216407	0.562347	0.0015519	MIC not significant	FALSE	FALSE	FALSE	FALSE	FALSE	FALSE	FALSE	FALSE
pcodonTATGAA	1343	0.097746	0.00113198	0.897	0.911	0.897536	0.910948	72	0.32739	0.000375385	0.096	0.051	0.0823779	0.0430358	0.871669	MIC not significant	FALSE	FALSE	FALSE	FALSE	FALSE	FALSE	FALSE	FALSE
pcodonTATGAG	1343	0.106383	0.000614887	0.39	0.385	0.413153	0.40037	44	0.260604	0.0126213	0.445	0.367	0.496063	0.414977	0.467803	MIC not significant	FALSE	FALSE	FALSE	FALSE	FALSE	FALSE	FALSE	FALSE
pcodonTATGGT	1343	0.116846	0.00129255	0.235	0.246	0.245792	0.269396	211	0.208258	0.0149806	0.494	0.7	0.521367	0.70176	0.0760621	MIC not significant	FALSE	FALSE	FALSE	FALSE	FALSE	FALSE	FALSE	FALSE
pcodonTATGGC	1343	0.11506	0.00765049	0.166	0.474	0.162356	0.498082	121	0.288658	0.000167061	0.039	0.023	0.0241225	0.0110118	0.888101	MIC not significant	FALSE	FALSE	FALSE	FALSE	FALSE	FALSE	FALSE	FALSE
pcodonTATGGA	1343	0.112871	0.00259634	0.386	0.489	0.395225	0.498867	199	0.246501	0.10345	0.043	0.999	0.0267389	0.994397	3.61562e-06	MIC not significant	FALSE	FALSE	FALSE	FALSE	FALSE	FALSE	FALSE	FALSE
pcodonTATGGG	1343	0.109278	0.00224339	0.595	0.681	0.615248	0.694307	202	0.188438	0.00592885	0.897	0.914	0.890541	0.903867	0.276071	MIC not significant	FALSE	FALSE	FALSE	FALSE	FALSE	FALSE	FALSE	FALSE
pcodonTACTTT	1343	0.11926	0.0183229	0.071	0.836	0.0603616	0.836918	130	0.231006	0.00188773	0.581	0.505	0.609244	0.527592	0.623546	MIC not significant	FALSE	FALSE	FALSE	FALSE	FALSE	FALSE	FALSE	FALSE
pcodonTACTTC	1343	0.109793	0.0109999	0.263	0.847	0.285644	0.847349	84	0.325267	0.0795427	0.1	0.594	0.082851	0.623187	0.00934582	MIC not significant	FALSE	FALSE	FALSE	FALSE	FALSE	FALSE	FALSE	FALSE
pcodonTACTTA	1343	0.111392	0.0066164	0.253	0.567	0.254393	0.590755	101	0.192339	0.0124281	0.89	0.912	0.880181	0.894528	0.267046	MIC not significant	FALSE	FALSE	FALSE	FALSE	FALSE	FALSE	FALSE	FALSE
pcodonTACTTG	1343	0.133686	0.0332187	0.000526316	0.852632	0.0001008	0.84982	127	0.299654	0.00148048	0.051	0.032	0.0390698	0.023826	0.66757	MIC not significant	TRUE	FALSE	FALSE	FALSE	TRUE	FALSE	FALSE	FALSE
pcodonTACTCT	1343	0.117731	0.0088654	0.022	0.21	0.0162099	0.218909	56	0.215574	5.15116e-07	0.881	0.769	0.870159	0.771258	0.995811	MIC not significant	FALSE	FALSE	FALSE	FALSE	FALSE	FALSE	FALSE	FALSE
pcodonTACTCC	1343	0.105606	0.00205313	0.408	0.491	0.436999	0.530819	45	0.327389	0.028263	0.092	0.104	0.0816541	0.0989953	0.268677	MIC not significant	FALSE	FALSE	FALSE	FALSE	FALSE	FALSE	FALSE	FALSE
pcodonTACTCG	1343	0.114902	0.00645289	0.057	0.214	0.0428914	0.231461	58	0.345392	0.0373328	0.066	0.109	0.0491294	0.102176	0.146169	MIC not significant	FALSE	FALSE	FALSE	FALSE	FALSE	FALSE	FALSE	FALSE
pcodonTACTAT	1343	0.100681	0.00208888	0.783	0.855	0.791912	0.856488	44	0.34927	0.0384701	0.072	0.091	0.0590102	0.0929606	0.201951	MIC not significant	FALSE	FALSE	FALSE	FALSE	FALSE	FALSE	FALSE	FALSE
pcodonTACTAC	1343	0.120614	0.00532859	0.004	0.04	0.00292062	0.0261135	45	0.261338	1.51074e-05	0.409	0.255	0.458778	0.300032	0.979784	MIC not significant	TRUE	FALSE	FALSE	FALSE	TRUE	FALSE	FALSE	FALSE
pcodonTACTAG	1343	0.111917	0.00923915	0.114	0.572	0.105353	0.604157	54	0.29372	0.000344585	0.357	0.251	0.405158	0.273399	0.893863	MIC not significant	FALSE	FALSE	FALSE	FALSE	FALSE	FALSE	FALSE	FALSE
pcodonTACTGT	1343	0.120038	0.0148084	0.007	0.405	0.00284288	0.423176	51	0.253312	0.0173158	0.728	0.723	0.741705	0.731974	0.357337	MIC not significant	FALSE	FALSE	FALSE	FALSE	TRUE	FALSE	FALSE	FALSE
pcodonTACTGC	1343	0.100825	0.00050857	0.758	0.758	0.783324	0.769325	49	0.35841	0.0340382	0.159	0.2	0.162036	0.219393	0.204424	MIC not significant	FALSE	FALSE	FALSE	FALSE	FALSE	FALSE	FALSE	FALSE
pcodonTACTGA	1343	0.109775	0.00920893	0.196	0.726	0.201201	0.746683	47	0.322269	0.000928442	0.376	0.266	0.429038	0.293094	0.838888	MIC not significant	FALSE	FALSE	FALSE	FALSE	FALSE	FALSE	FALSE	FALSE
pcodonTACTGG	1343	0.104871	0.00439938	0.552	0.752	0.561591	0.769359	73	0.253357	2.94863e-05	0.529	0.411	0.570572	0.447243	0.963633	MIC not significant	FALSE	FALSE	FALSE	FALSE	FALSE	FALSE	FALSE	FALSE
pcodonTACCTT	1343	0.116506	0.00640191	0.053	0.179	0.0375932	0.192472	74	0.361076	0.0432388	0.024	0.052	0.00858654	0.0436974	0.0754373	MIC not significant	FALSE	FALSE	FALSE	FALSE	FALSE	FALSE	FALSE	FALSE
pcodonTACATT	1343	0.118929	0.0202461	0.054	0.884	0.0469117	0.879258	108	0.27473	0.00217075	0.204	0.156	0.211991	0.154695	0.632069	MIC not significant	FALSE	FALSE	FALSE	FALSE	FALSE	FALSE	FALSE	FALSE
pcodonTACATC	1343	0.111669	0.00868918	0.106	0.548	0.101893	0.571475	52	0.257458	0.00546638	0.711	0.617	0.728172	0.638953	0.601448	MIC not significant	FALSE	FALSE	FALSE	FALSE	FALSE	FALSE	FALSE	FALSE
pcodonTACATA	1343	0.107467	0.0051222	0.306	0.607	0.321768	0.628767	54	0.23668	0.000749037	0.798	0.661	0.806093	0.688379	0.84426	MIC not significant	FALSE	FALSE	FALSE	FALSE	FALSE	FALSE	FALSE	FALSE
pcodonTACATG	1343	0.139056	0.0145437	2.63158e-05	0.00940789	2.44854e-06	0.00535431	121	0.246213	0.0078662	0.243	0.226	0.267984	0.258045	0.33335	MIC not significant	TRUE	FALSE	FALSE	FALSE	TRUE	FALSE	FALSE	FALSE
pcodonTACACC	1343	0.0970553	0.000945949	0.945	0.955	0.930559	0.937468	46	0.26629	0.0192716	0.355	0.336	0.412272	0.385042	0.35635	MIC not significant	FALSE	FALSE	FALSE	FALSE	FALSE	FALSE	FALSE	FALSE
pcodonTACACG	1343	0.106472	3.23067e-05	0.391	0.35	0.40339	0.360967	63	0.289816	7.38319e-05	0.5	0.367	0.540817	0.409283	0.946702	MIC not significant	FALSE	FALSE	FALSE	FALSE	FALSE	FALSE	FALSE	FALSE
pcodonTACAAT	1343	0.114743	0.0036219	0.044	0.105	0.0331767	0.0965304	46	0.261659	0.00441161	0.403	0.272	0.437091	0.308068	0.660043	MIC not significant	FALSE	FALSE	FALSE	FALSE	FALSE	FALSE	FALSE	FALSE
pcodonTACAAG	1343	0.110035	0.00395609	0.219	0.402	0.221491	0.412179	67	0.237642	0.000363884	0.851	0.736	0.834269	0.7444	0.878019	MIC not significant	FALSE	FALSE	FALSE	FALSE	FALSE	FALSE	FALSE	FALSE
pcodonTACAGG	1343	0.102669	0.00511051	0.612	0.908	0.651215	0.88639	54	0.290404	0.00038236	0.38	0.27	0.421069	0.287234	0.88822	MIC not significant	FALSE	FALSE	FALSE	FALSE	FALSE	FALSE	FALSE	FALSE
pcodonTACGCT	1343	0.102232	0.00473902	0.679	0.909	0.69933	0.891611	53	0.352298	0.152743	0.116	0.93	0.114552	0.903695	0.00404745	MIC not significant	FALSE	FALSE	FALSE	FALSE	FALSE	FALSE	FALSE	FALSE
pcodonTACGCC	1343	0.103896	0.000674313	0.577	0.57	0.590278	0.584819	47	0.278182	0.00168045	0.683	0.564	0.719067	0.597115	0.784405	MIC not significant	FALSE	FALSE	FALSE	FALSE	FALSE	FALSE	FALSE	FALSE
pcodonTACGCG	1343	0.117215	0.00238218	0.037	0.064	0.0285882	0.0511331	70	0.19636	0.00166769	0.979	0.944	0.955091	0.923471	0.737129	MIC not significant	FALSE	FALSE	FALSE	FALSE	FALSE	FALSE	FALSE	FALSE
pcodonTACGGT	1343	0.10593	0.00349777	0.393	0.589	0.419502	0.609074	59	0.278029	0.0366149	0.325	0.488	0.379048	0.54514	0.146281	MIC not significant	FALSE	FALSE	FALSE	FALSE	FALSE	FALSE	FALSE	FALSE
pcodonTACGGA	1343	0.109466	0.00258375	0.189	0.286	0.203277	0.309652	47	0.358789	0.0707375	0.209	0.476	0.209855	0.516672	0.0707676	MIC not significant	FALSE	FALSE	FALSE	FALSE	FALSE	FALSE	FALSE	FALSE
pcodonTACGGG	1343	0.109464	0.00459123	0.175	0.401	0.18931	0.435993	45	0.251649	0.000307058	0.505	0.351	0.553508	0.379102	0.908999	MIC not significant	FALSE	FALSE	FALSE	FALSE	FALSE	FALSE	FALSE	FALSE
pcodonTAATTT	1343	0.126851	0.022099	0.008	0.66	0.00445115	0.682144	134	0.25831	0.0112418	0.198	0.232	0.215575	0.25318	0.222731	MIC not significant	FALSE	FALSE	FALSE	FALSE	TRUE	FALSE	FALSE	FALSE
pcodonTAATTC	1343	0.0950309	0.00348456	0.959	0.994	0.946963	0.979471	74	0.240284	0.00173308	0.651	0.541	0.679227	0.574457	0.724709	MIC not significant	FALSE	FALSE	FALSE	FALSE	FALSE	FALSE	FALSE	FALSE
pcodonTAATTA	1343	0.112227	0.00576109	0.197	0.415	0.188591	0.45086	94	0.333054	0.0182605	0.022	0.028	0.00919787	0.0147448	0.194087	MIC not significant	FALSE	FALSE	FALSE	FALSE	FALSE	FALSE	FALSE	FALSE
pcodonTAATTG	1343	0.107619	0.00722491	0.357	0.766	0.381694	0.765246	76	0.276175	0.0236586	0.244	0.323	0.273363	0.367379	0.18464	MIC not significant	FALSE	FALSE	FALSE	FALSE	FALSE	FALSE	FALSE	FALSE
pcodonTAATCT	1343	0.110806	0.00391962	0.135	0.298	0.141918	0.318581	43	0.252937	0.00652723	0.562	0.431	0.600478	0.475901	0.60543	MIC not significant	FALSE	FALSE	FALSE	FALSE	FALSE	FALSE	FALSE	FALSE
pcodonTAATAT	1343	0.101335	0.0051902	0.739	0.94	0.741614	0.919123	61	0.308027	0.000655117	0.13	0.072	0.131629	0.0650051	0.844765	MIC not significant	FALSE	FALSE	FALSE	FALSE	FALSE	FALSE	FALSE	FALSE
pcodonTAATGT	1343	0.119057	0.0149791	0.008	0.5	0.00496466	0.527495	45	0.243886	0.0230768	0.551	0.568	0.599245	0.607653	0.318056	MIC not significant	FALSE	FALSE	FALSE	FALSE	TRUE	FALSE	FALSE	FALSE
pcodonTAATGC	1343	0.105122	0.00349664	0.478	0.665	0.496194	0.700669	42	0.239983	0.00937714	0.703	0.583	0.713163	0.628939	0.541819	MIC not significant	FALSE	FALSE	FALSE	FALSE	FALSE	FALSE	FALSE	FALSE
pcodonTAATGG	1343	0.118911	0.0110582	0.022	0.292	0.0143809	0.298424	71	0.240574	0.023621	0.715	0.808	0.73663	0.800752	0.200665	MIC not significant	FALSE	FALSE	FALSE	FALSE	FALSE	FALSE	FALSE	FALSE
pcodonTAACTT	1343	0.131827	0.00899431	0.001	0.008	3.25716e-05	0.00319739	86	0.302598	0.000254519	0.169	0.109	0.174708	0.102949	0.884085	MIC not significant	TRUE	FALSE	FALSE	FALSE	TRUE	FALSE	FALSE	FALSE
pcodonTAACCT	1343	0.114817	0.0013175	0.038	0.048	0.0367477	0.0466615	56	0.219697	0.0183535	0.869	0.87	0.856761	0.860224	0.318538	MIC not significant	FALSE	FALSE	FALSE	FALSE	FALSE	FALSE	FALSE	FALSE
pcodonTAACGT	1343	0.111221	0.00964568	0.128	0.701	0.123532	0.721177	40	0.230244	0.0115796	0.809	0.731	0.799553	0.736448	0.508664	MIC not significant	FALSE	FALSE	FALSE	FALSE	FALSE	FALSE	FALSE	FALSE
pcodonTAAATT	1343	0.109231	0.00727853	0.424	0.793	0.439332	0.795127	119	0.179879	0.00269452	0.971	0.953	0.946506	0.923656	0.57503	MIC not significant	FALSE	FALSE	FALSE	FALSE	FALSE	FALSE	FALSE	FALSE
pcodonTAAATC	1343	0.101825	6.33585e-05	0.715	0.675	0.725911	0.688914	56	0.287024	0.000181332	0.336	0.226	0.388264	0.260847	0.921534	MIC not significant	FALSE	FALSE	FALSE	FALSE	FALSE	FALSE	FALSE	FALSE
pcodonTAAATA	1343	0.108836	0.00701646	0.226	0.625	0.238576	0.644317	55	0.330251	0.0575861	0.137	0.3	0.136667	0.3529	0.0777474	MIC not significant	FALSE	FALSE	FALSE	FALSE	FALSE	FALSE	FALSE	FALSE
pcodonTAAATG	1343	0.114357	0.0106987	0.096	0.559	0.0860287	0.578239	78	0.263922	0.00813621	0.328	0.285	0.353634	0.318886	0.431436	MIC not significant	FALSE	FALSE	FALSE	FALSE	FALSE	FALSE	FALSE	FALSE
pcodonTAAACT	1343	0.100945	0.00817385	0.724	0.982	0.741456	0.968795	65	0.295588	0.0166355	0.405	0.425	0.450874	0.463936	0.305851	MIC not significant	FALSE	FALSE	FALSE	FALSE	FALSE	FALSE	FALSE	FALSE
pcodonTAAACC	1343	0.0980725	0.000757274	0.914	0.91	0.901407	0.904149	42	0.225193	0.00318981	0.772	0.642	0.781301	0.668735	0.721618	MIC not significant	FALSE	FALSE	FALSE	FALSE	FALSE	FALSE	FALSE	FALSE
pcodonTAAACG	1343	0.104292	0.000789928	0.546	0.543	0.57176	0.57535	70	0.266749	0.000526144	0.498	0.38	0.539989	0.41279	0.8505	MIC not significant	FALSE	FALSE	FALSE	FALSE	FALSE	FALSE	FALSE	FALSE
pcodonTAAAAG	1343	0.0988736	0.00108143	0.872	0.892	0.863935	0.877717	53	0.267895	0.0267658	0.602	0.671	0.633278	0.685044	0.241028	MIC not significant	FALSE	FALSE	FALSE	FALSE	FALSE	FALSE	FALSE	FALSE
pcodonTAAAGG	1343	0.0998613	0.00737989	0.807	0.988	0.818431	0.979104	62	0.436357	0.0663409	0.002	0.006	3.02764e-05	0.00138611	0.0432743	MIC not significant	FALSE	TRUE	FALSE	FALSE	FALSE	TRUE	FALSE	FALSE
pcodonTAAGTC	1343	0.115689	0.0137059	0.034	0.657	0.0232332	0.67784	41	0.369905	0.0129817	0.082	0.059	0.0833239	0.0459434	0.476785	MIC not significant	FALSE	FALSE	FALSE	FALSE	FALSE	FALSE	FALSE	FALSE
pcodonTAAGCG	1343	0.111939	0.00744893	0.128	0.46	0.123986	0.494892	51	0.256114	0.000400018	0.74	0.583	0.748205	0.616647	0.889209	MIC not significant	FALSE	FALSE	FALSE	FALSE	FALSE	FALSE	FALSE	FALSE
pcodonTAAGGT	1343	0.10944	0.00793635	0.252	0.682	0.279257	0.705017	77	0.253443	0.000841618	0.432	0.338	0.496747	0.387922	0.802234	MIC not significant	FALSE	FALSE	FALSE	FALSE	FALSE	FALSE	FALSE	FALSE
pcodonTAAGGC	1343	0.114593	4.55924e-05	0.059	0.048	0.049237	0.0376369	55	0.488781	0.0168856	0.002	0.003	2.27645e-05	8.91438e-06	0.344364	MIC not significant	FALSE	TRUE	FALSE	FALSE	FALSE	TRUE	FALSE	FALSE
pcodonTAAGGA	1343	0.10159	0.000257925	0.705	0.676	0.729175	0.704313	65	0.272057	0.000241427	0.569	0.438	0.612678	0.49011	0.902228	MIC not significant	FALSE	FALSE	FALSE	FALSE	FALSE	FALSE	FALSE	FALSE
pcodonTAAGGG	1343	0.130959	0.0279107	0.001	0.625	0.000183006	0.638335	88	0.262188	0.0008801	0.431	0.336	0.474605	0.364132	0.783795	MIC not significant	TRUE	FALSE	FALSE	FALSE	TRUE	FALSE	FALSE	FALSE
pcodonTAGTTT	1343	0.1262	0.0176208	0.019	0.536	0.0123474	0.557474	168	0.177941	0.000129622	0.938	0.889	0.918449	0.880349	0.883549	MIC not significant	FALSE	FALSE	FALSE	FALSE	FALSE	FALSE	FALSE	FALSE
pcodonTAGTTC	1343	0.122442	0.0133489	0.015	0.285	0.00829309	0.312175	96	0.205078	0.00577376	0.87	0.821	0.853129	0.813627	0.461845	MIC not significant	FALSE	FALSE	FALSE	FALSE	FALSE	FALSE	FALSE	FALSE
pcodonTAGTTA	1343	0.0985627	0.00394521	0.893	0.961	0.888114	0.95649	97	0.268577	0.0693763	0.214	0.837	0.223886	0.823355	0.00914196	MIC not significant	FALSE	FALSE	FALSE	FALSE	FALSE	FALSE	FALSE	FALSE
pcodonTAGTTG	1343	0.132933	0.0312604	0.001	0.812	0.000309949	0.81593	133	0.218017	0.00505125	0.7	0.685	0.721595	0.697206	0.416255	MIC not significant	TRUE	FALSE	FALSE	FALSE	TRUE	FALSE	FALSE	FALSE
pcodonTAGTCT	1343	0.107933	0.0124504	0.312	0.95	0.322809	0.935249	55	0.294725	0.0138488	0.302	0.284	0.352726	0.316524	0.392176	MIC not significant	FALSE	FALSE	FALSE	FALSE	FALSE	FALSE	FALSE	FALSE
pcodonTAGTCC	1343	0.109672	0.00242338	0.207	0.284	0.20451	0.309464	40	0.375722	0.000519683	0.073	0.042	0.0600773	0.0212916	0.888957	MIC not significant	FALSE	FALSE	FALSE	FALSE	FALSE	FALSE	FALSE	FALSE
pcodonTAGTCG	1343	0.119821	0.0123083	0.018	0.276	0.00919776	0.297489	72	0.248491	0.031019	0.622	0.802	0.665437	0.795938	0.138904	MIC not significant	FALSE	FALSE	FALSE	FALSE	FALSE	FALSE	FALSE	FALSE
pcodonTAGTAT	1343	0.114869	0.00630342	0.056	0.226	0.0514811	0.239382	66	0.193435	5.61659e-05	0.99	0.964	0.970757	0.943743	0.952377	MIC not significant	FALSE	FALSE	FALSE	FALSE	FALSE	FALSE	FALSE	FALSE
pcodonTAGTAC	1343	0.115899	0.0114979	0.032	0.474	0.0231367	0.497874	46	0.164387	0.0217446	0.983	0.972	0.94459	0.949402	0.328093	MIC not significant	FALSE	FALSE	FALSE	FALSE	FALSE	FALSE	FALSE	FALSE
pcodonTAGTAG	1343	0.120272	0.0258225	0.014	0.962	0.00726618	0.949656	66	0.332937	0.00248713	0.15	0.102	0.165863	0.100535	0.69088	MIC not significant	FALSE	FALSE	FALSE	FALSE	TRUE	FALSE	FALSE	FALSE
pcodonTAGTGT	1343	0.1101	0.0129689	0.181	0.904	0.179118	0.891644	58	0.311224	0.0289904	0.144	0.192	0.144884	0.20991	0.201309	MIC not significant	FALSE	FALSE	FALSE	FALSE	FALSE	FALSE	FALSE	FALSE
pcodonTAGTGC	1343	0.104124	0.00458442	0.548	0.787	0.56623	0.791637	63	0.337418	0.00135569	0.192	0.123	0.196072	0.118162	0.774501	MIC not significant	FALSE	FALSE	FALSE	FALSE	FALSE	FALSE	FALSE	FALSE
pcodonTAGTGA	1343	0.103875	0.00411046	0.554	0.788	0.577992	0.775855	60	0.273096	0.0444649	0.344	0.573	0.385026	0.61143	0.105824	MIC not significant	FALSE	FALSE	FALSE	FALSE	FALSE	FALSE	FALSE	FALSE
pcodonTAGTGG	1343	0.122892	0.00745249	0.007	0.077	0.00731845	0.073646	100	0.226487	0.000772244	0.582	0.498	0.607858	0.508855	0.783737	MIC not significant	FALSE	FALSE	FALSE	FALSE	TRUE	FALSE	FALSE	FALSE
pcodonTAGCTT	1343	0.121088	0.0042903	0.009	0.025	0.00476191	0.0222742	74	0.271451	0.000101713	0.324	0.226	0.361536	0.260842	0.932037	MIC not significant	FALSE	FALSE	FALSE	FALSE	TRUE	FALSE	FALSE	FALSE
pcodonTAGATT	1343	0.12104	0.00857977	0.075	0.376	0.0785791	0.387061	205	0.223619	0.00725627	0.326	0.346	0.353809	0.39461	0.224596	MIC not significant	FALSE	FALSE	FALSE	FALSE	FALSE	FALSE	FALSE	FALSE
pcodonTAGATC	1343	0.107545	0.00624086	0.435	0.737	0.45145	0.752964	98	0.238703	1.43428e-05	0.469	0.361	0.49844	0.381672	0.970477	MIC not significant	FALSE	FALSE	FALSE	FALSE	FALSE	FALSE	FALSE	FALSE
pcodonTAGATA	1343	0.109669	0.00935098	0.266	0.753	0.267676	0.759913	89	0.333837	0.00104738	0.044	0.032	0.0269679	0.0141724	0.763356	MIC not significant	FALSE	FALSE	FALSE	FALSE	FALSE	FALSE	FALSE	FALSE
pcodonTAGATG	1343	0.122012	0.00877266	0.051	0.262	0.0403852	0.282534	162	0.178952	0.00280983	0.961	0.94	0.940677	0.922797	0.502905	MIC not significant	FALSE	FALSE	FALSE	FALSE	FALSE	FALSE	FALSE	FALSE
pcodonTAGACT	1343	0.112181	0.0127847	0.189	0.806	0.186231	0.805988	86	0.228428	0.0149061	0.829	0.869	0.826904	0.850633	0.262231	MIC not significant	FALSE	FALSE	FALSE	FALSE	FALSE	FALSE	FALSE	FALSE
pcodonTAGACC	1343	0.104657	0.00279415	0.536	0.669	0.557178	0.680012	77	0.29332	0.000218292	0.16	0.104	0.176566	0.101621	0.898365	MIC not significant	FALSE	FALSE	FALSE	FALSE	FALSE	FALSE	FALSE	FALSE
pcodonTAGACG	1343	0.0963349	0.000548942	0.96	0.952	0.948415	0.945812	112	0.196984	0.00871705	0.953	0.946	0.931429	0.932262	0.327511	MIC not significant	FALSE	FALSE	FALSE	FALSE	FALSE	FALSE	FALSE	FALSE
pcodonTAGAAT	1343	0.115335	0.018437	0.051	0.917	0.0364056	0.910811	55	0.286761	0.0189537	0.354	0.377	0.397545	0.403282	0.316181	MIC not significant	FALSE	FALSE	FALSE	FALSE	FALSE	FALSE	FALSE	FALSE
pcodonTAGAAC	1343	0.103945	0.00587723	0.558	0.861	0.580139	0.855167	55	0.245208	0.0102111	0.67	0.626	0.693736	0.640331	0.462903	MIC not significant	FALSE	FALSE	FALSE	FALSE	FALSE	FALSE	FALSE	FALSE
pcodonTAGAAG	1343	0.101633	0.00060503	0.849	0.845	0.838473	0.833286	126	0.294736	0.00893336	0.076	0.075	0.0599307	0.0615251	0.292465	MIC not significant	FALSE	FALSE	FALSE	FALSE	FALSE	FALSE	FALSE	FALSE
pcodonTAGAGT	1343	0.106208	0.0161336	0.397	1	0.418162	0.997244	44	0.392296	0.0768606	0.027	0.085	0.00980645	0.0718762	0.0687351	MIC not significant	FALSE	FALSE	FALSE	FALSE	FALSE	FALSE	FALSE	FALSE
pcodonTAGAGC	1343	0.103118	0.000139981	0.609	0.558	0.630596	0.590751	62	0.23992	0.0093511	0.541	0.467	0.594067	0.524827	0.454651	MIC not significant	FALSE	FALSE	FALSE	FALSE	FALSE	FALSE	FALSE	FALSE
pcodonTAGAGG	1343	0.109562	0.000230684	0.356	0.334	0.369164	0.340048	107	0.211928	0.00372919	0.89	0.847	0.873751	0.835909	0.532071	MIC not significant	FALSE	FALSE	FALSE	FALSE	FALSE	FALSE	FALSE	FALSE
pcodonTAGGTC	1343	0.106306	0.00346045	0.389	0.578	0.418697	0.610337	46	0.285247	0.0087191	0.215	0.16	0.253872	0.173116	0.537083	MIC not significant	FALSE	FALSE	FALSE	FALSE	FALSE	FALSE	FALSE	FALSE
pcodonTAGGTG	1343	0.103449	0.00760381	0.596	0.943	0.616428	0.928173	58	0.189817	0.000494648	0.967	0.89	0.940796	0.879745	0.868383	MIC not significant	FALSE	FALSE	FALSE	FALSE	FALSE	FALSE	FALSE	FALSE
pcodonTAGGCT	1343	0.109818	0.00569226	0.252	0.54	0.269999	0.556414	79	0.314686	0.0207294	0.056	0.07	0.0402299	0.0540049	0.205547	MIC not significant	FALSE	FALSE	FALSE	FALSE	FALSE	FALSE	FALSE	FALSE
pcodonTAGGCC	1343	0.101026	0.00422958	0.763	0.917	0.768693	0.917201	50	0.321585	0.0154686	0.277	0.269	0.321013	0.289721	0.389485	MIC not significant	FALSE	FALSE	FALSE	FALSE	FALSE	FALSE	FALSE	FALSE
pcodonTAGGCG	1343	0.123355	0.0107604	0.006	0.144	0.00479252	0.141655	94	0.219226	0.0238478	0.763	0.882	0.780815	0.867311	0.137245	MIC not significant	TRUE	FALSE	FALSE	FALSE	TRUE	FALSE	FALSE	FALSE
pcodonTAGGGT	1343	0.12116	0.00385478	0.019	0.044	0.0132175	0.0376171	99	0.205747	0.0187713	0.822	0.895	0.816758	0.884419	0.176282	MIC not significant	FALSE	FALSE	FALSE	FALSE	FALSE	FALSE	FALSE	FALSE
pcodonTAGGGC	1343	0.110204	0.00175551	0.208	0.253	0.228155	0.273527	76	0.345132	0.000202142	0.035	0.018	0.01648	0.00639766	0.902979	MIC not significant	FALSE	FALSE	FALSE	FALSE	FALSE	FALSE	FALSE	FALSE
pcodonTAGGGA	1343	0.107926	0.00860826	0.396	0.84	0.418437	0.83996	95	0.228644	0.00355754	0.654	0.57	0.685599	0.607795	0.565857	MIC not significant	FALSE	FALSE	FALSE	FALSE	FALSE	FALSE	FALSE	FALSE
pcodonTAGGGG	1343	0.129245	0.0207963	0.001	0.321	0.000388377	0.336121	91	0.245847	4.72601e-06	0.563	0.432	0.588294	0.474053	0.983683	MIC not significant	TRUE	FALSE	FALSE	FALSE	TRUE	FALSE	FALSE	FALSE
pcodonTGTTTT	1343	0.147573	0.0219836	0	0.0147327	4.38684e-08	0.00991231	166	0.224093	4.12959e-05	0.32	0.256	0.362082	0.279549	0.934511	MIC not significant	TRUE	FALSE	FALSE	FALSE	TRUE	FALSE	FALSE	FALSE
pcodonTGTTTC	1343	0.121894	0.00952889	0.014	0.14	0.00826666	0.145593	96	0.286864	0.0163245	0.118	0.147	0.103199	0.136193	0.21438	MIC not significant	FALSE	FALSE	FALSE	FALSE	FALSE	FALSE	FALSE	FALSE
pcodonTGTTTA	1343	0.124581	0.0192285	0.014	0.602	0.00842419	0.629689	126	0.243096	0.00109291	0.519	0.42	0.54672	0.453192	0.713253	MIC not significant	FALSE	FALSE	FALSE	FALSE	FALSE	FALSE	FALSE	FALSE
pcodonTGTTTG	1343	0.12709	0.0296104	0.01	0.97	0.00675478	0.955988	158	0.261585	0.0162125	0.102	0.169	0.0983872	0.170295	0.110873	MIC not significant	FALSE	FALSE	FALSE	FALSE	TRUE	FALSE	FALSE	FALSE
pcodonTGTTCT	1343	0.119061	0.0129627	0.024	0.379	0.0143025	0.389637	74	0.230535	0.00945566	0.724	0.682	0.744121	0.710939	0.409822	MIC not significant	FALSE	FALSE	FALSE	FALSE	FALSE	FALSE	FALSE	FALSE
pcodonTGTTCC	1343	0.116711	0.00194336	0.012	0.023	0.0103484	0.0179271	43	0.254331	0.00420708	0.541	0.395	0.585197	0.448004	0.679437	MIC not significant	FALSE	FALSE	FALSE	FALSE	FALSE	FALSE	FALSE	FALSE
pcodonTGTTCA	1343	0.108094	0.00872501	0.254	0.835	0.287014	0.828974	44	0.417345	0.0570062	0.011	0.023	0.00206712	0.011673	0.118453	MIC not significant	FALSE	FALSE	FALSE	FALSE	FALSE	TRUE	FALSE	FALSE
pcodonTGTTCG	1343	0.117021	0.00861649	0.05	0.302	0.0453233	0.320402	86	0.394491	0.0285066	0.002	0.005	0.00046202	0.00193204	0.120181	MIC not significant	FALSE	TRUE	FALSE	FALSE	FALSE	TRUE	FALSE	FALSE
pcodonTGTTAT	1343	0.111695	0.00667842	0.204	0.503	0.204524	0.526145	93	0.29068	0.000462913	0.127	0.084	0.14245	0.0927301	0.837803	MIC not significant	FALSE	FALSE	FALSE	FALSE	FALSE	FALSE	FALSE	FALSE
pcodonTGTTAC	1343	0.113159	0.0189779	0.08	0.988	0.0657083	0.970925	44	0.256283	0.0323949	0.504	0.597	0.568238	0.622072	0.241502	MIC not significant	FALSE	FALSE	FALSE	FALSE	FALSE	FALSE	FALSE	FALSE
pcodonTGTTAG	1343	0.1118	0.0109343	0.11	0.718	0.118111	0.729204	53	0.265565	0.00814131	0.606	0.523	0.636694	0.560429	0.520531	MIC not significant	FALSE	FALSE	FALSE	FALSE	FALSE	FALSE	FALSE	FALSE
pcodonTGTTGT	1343	0.114731	0.0130401	0.058	0.637	0.0439899	0.66475	55	0.245769	0.00207275	0.696	0.562	0.73089	0.618371	0.741357	MIC not significant	FALSE	FALSE	FALSE	FALSE	FALSE	FALSE	FALSE	FALSE
pcodonTGTTGC	1343	0.109525	0.000613464	0.256	0.248	0.261966	0.250128	74	0.3425	0.0187861	0.038	0.044	0.0265787	0.0333325	0.244227	MIC not significant	FALSE	FALSE	FALSE	FALSE	FALSE	FALSE	FALSE	FALSE
pcodonTGTTGA	1343	0.109671	0.0134284	0.3	0.938	0.319617	0.927297	96	0.260767	0.00466762	0.289	0.235	0.31511	0.256024	0.508355	MIC not significant	FALSE	FALSE	FALSE	FALSE	FALSE	FALSE	FALSE	FALSE
pcodonTGTTGG	1343	0.114046	0.0167645	0.144	0.922	0.148837	0.914791	106	0.356408	0.0252138	0.01	0.021	0.00257908	0.00846362	0.103997	MIC not significant	FALSE	FALSE	FALSE	FALSE	FALSE	TRUE	FALSE	FALSE
pcodonTGTCTT	1343	0.118035	0.00514253	0.035	0.108	0.0256743	0.106004	78	0.269293	0.0212669	0.25	0.317	0.26586	0.348716	0.202671	MIC not significant	FALSE	FALSE	FALSE	FALSE	FALSE	FALSE	FALSE	FALSE
pcodonTGTCTA	1343	0.117305	0.0107509	0.016	0.318	0.00937703	0.332079	40	0.444361	0.202584	0.022	0.547	0.00397078	0.59176	0.00388298	non-significant monotone/non-monotone	FALSE	FALSE	FALSE	FALSE	FALSE	TRUE	FALSE	FALSE
pcodonTGTCTG	1343	0.103206	0.00877595	0.619	0.983	0.636601	0.967723	45	0.290362	0.0208529	0.236	0.227	0.264607	0.249228	0.343938	MIC not significant	FALSE	FALSE	FALSE	FALSE	FALSE	FALSE	FALSE	FALSE
pcodonTGTCCT	1343	0.113693	0.0158052	0.111	0.877	0.105418	0.864575	78	0.244289	0.00917855	0.522	0.488	0.559469	0.525499	0.404064	MIC not significant	FALSE	FALSE	FALSE	FALSE	FALSE	FALSE	FALSE	FALSE
pcodonTGTCCG	1343	0.11975	0.0178209	0.019	0.609	0.0094927	0.647681	68	0.277983	0.00109156	0.428	0.325	0.488471	0.364758	0.78911	MIC not significant	FALSE	FALSE	FALSE	FALSE	FALSE	FALSE	FALSE	FALSE
pcodonTGTCGT	1343	0.116605	0.0184859	0.043	0.856	0.0350381	0.859757	61	0.231052	0.0045034	0.659	0.559	0.687879	0.596671	0.606486	MIC not significant	FALSE	FALSE	FALSE	FALSE	FALSE	FALSE	FALSE	FALSE
pcodonTGTCGA	1343	0.111237	0.0133793	0.143	0.884	0.143442	0.876194	55	0.211943	0.000210313	0.93	0.856	0.903205	0.833702	0.91623	MIC not significant	FALSE	FALSE	FALSE	FALSE	FALSE	FALSE	FALSE	FALSE
pcodonTGTCGG	1343	0.116034	0.0133654	0.028	0.622	0.0231084	0.642903	40	0.274257	0.0116381	0.512	0.437	0.568774	0.472361	0.506244	MIC not significant	FALSE	FALSE	FALSE	FALSE	FALSE	FALSE	FALSE	FALSE
pcodonTGTATT	1343	0.1291	0.0247199	0.004	0.744	0.00190669	0.741937	155	0.266475	0.00461048	0.09	0.084	0.0898898	0.0827583	0.401199	MIC not significant	TRUE	FALSE	FALSE	FALSE	TRUE	FALSE	FALSE	FALSE
pcodonTGTATC	1343	0.13298	0.0139362	0.000171053	0.0206974	1.20087e-05	0.013956	79	0.28938	0.0102999	0.127	0.115	0.135861	0.120108	0.37348	MIC not significant	TRUE	FALSE	FALSE	FALSE	TRUE	FALSE	FALSE	FALSE
pcodonTGTATA	1343	0.11921	0.0161639	0.034	0.62	0.0270687	0.641259	83	0.327037	0.0218576	0.099	0.148	0.0911416	0.136897	0.18226	MIC not significant	FALSE	FALSE	FALSE	FALSE	FALSE	FALSE	FALSE	FALSE
pcodonTGTATG	1343	0.133552	0.0288569	0.00122368	0.709382	0.000257948	0.718911	152	0.249088	0.0129078	0.255	0.333	0.270342	0.347141	0.16342	MIC not significant	TRUE	FALSE	FALSE	FALSE	TRUE	FALSE	FALSE	FALSE
pcodonTGTACT	1343	0.120401	0.0204504	0.015	0.769	0.00937959	0.778919	67	0.299526	0.0445431	0.325	0.561	0.357028	0.594927	0.0864557	MIC not significant	FALSE	FALSE	FALSE	FALSE	FALSE	FALSE	FALSE	FALSE
pcodonTGTACC	1343	0.10012	0.00422787	0.805	0.956	0.812542	0.935864	47	0.326928	0.00136921	0.345	0.245	0.392211	0.25989	0.804503	MIC not significant	FALSE	FALSE	FALSE	FALSE	FALSE	FALSE	FALSE	FALSE
pcodonTGTACG	1343	0.0987583	0.00383742	0.872	0.968	0.869463	0.956016	53	0.379211	0.0068243	0.055	0.04	0.0333346	0.0185701	0.556485	MIC not significant	FALSE	FALSE	FALSE	FALSE	FALSE	FALSE	FALSE	FALSE
pcodonTGTAAC	1343	0.103537	0.00209112	0.588	0.692	0.616565	0.717312	41	0.315896	0.0687463	0.22	0.482	0.235781	0.535854	0.097778	MIC not significant	FALSE	FALSE	FALSE	FALSE	FALSE	FALSE	FALSE	FALSE
pcodonTGTAAG	1343	0.113671	0.00473128	0.1	0.223	0.0926441	0.236351	76	0.375653	0.000444954	0.011	0.006	0.00208662	0.000777604	0.856474	MIC not significant	FALSE	FALSE	FALSE	FALSE	FALSE	TRUE	FALSE	FALSE
pcodonTGTAGT	1343	0.128679	0.00878919	0.000289474	0.00703947	1.833e-05	0.00293092	54	0.235602	0.0125332	0.783	0.76	0.79911	0.770334	0.420264	MIC not significant	TRUE	FALSE	FALSE	FALSE	TRUE	FALSE	FALSE	FALSE
pcodonTGTAGA	1343	0.107342	0.0103729	0.322	0.936	0.337347	0.91736	44	0.228851	0.000101564	0.692	0.526	0.715292	0.562995	0.948233	MIC not significant	FALSE	FALSE	FALSE	FALSE	FALSE	FALSE	FALSE	FALSE
pcodonTGTAGG	1343	0.111989	0.00643453	0.157	0.431	0.144698	0.441706	71	0.213135	0.000758003	0.943	0.867	0.908502	0.848031	0.819364	MIC not significant	FALSE	FALSE	FALSE	FALSE	FALSE	FALSE	FALSE	FALSE
pcodonTGTGTC	1343	0.11667	0.00599113	0.041	0.136	0.0313211	0.152826	62	0.324913	0.000189752	0.067	0.035	0.0485498	0.019825	0.915374	MIC not significant	FALSE	FALSE	FALSE	FALSE	FALSE	FALSE	FALSE	FALSE
pcodonTGTGTG	1343	0.125296	0.0111766	0.004	0.117	0.00270897	0.109464	98	0.289197	0.00226278	0.08	0.062	0.0687295	0.044127	0.64184	MIC not significant	TRUE	FALSE	FALSE	FALSE	TRUE	FALSE	FALSE	FALSE
pcodonTGTGCT	1343	0.123963	0.0162711	0.004	0.409	0.0058717	0.424743	108	0.263725	0.00310931	0.319	0.266	0.366392	0.302895	0.566516	MIC not significant	TRUE	FALSE	FALSE	FALSE	TRUE	FALSE	FALSE	FALSE
pcodonTGTGCC	1343	0.113077	0.00603251	0.101	0.318	0.100038	0.331386	67	0.336688	0.00284269	0.121	0.078	0.119039	0.0672734	0.66828	MIC not significant	FALSE	FALSE	FALSE	FALSE	FALSE	FALSE	FALSE	FALSE
pcodonTGTGCA	1343	0.115816	0.0216583	0.044	0.982	0.0285261	0.967667	48	0.281604	0.0240647	0.593	0.642	0.635022	0.66333	0.292425	MIC not significant	FALSE	FALSE	FALSE	FALSE	FALSE	FALSE	FALSE	FALSE
pcodonTGTGCG	1343	0.111836	0.00882111	0.238	0.697	0.251798	0.705552	115	0.24367	0.0137393	0.411	0.47	0.449007	0.506381	0.212191	MIC not significant	FALSE	FALSE	FALSE	FALSE	FALSE	FALSE	FALSE	FALSE
pcodonTGTGAA	1343	0.119841	0.0105819	0.005	0.173	0.0026564	0.165215	44	0.285001	0.0492158	0.313	0.48	0.364351	0.53262	0.14749	MIC not significant	TRUE	FALSE	FALSE	FALSE	TRUE	FALSE	FALSE	FALSE
pcodonTGTGAG	1343	0.111136	0.00619739	0.123	0.437	0.118633	0.45274	41	0.319848	0.0397217	0.213	0.271	0.241831	0.317846	0.210822	MIC not significant	FALSE	FALSE	FALSE	FALSE	FALSE	FALSE	FALSE	FALSE
pcodonTGTGGT	1343	0.122377	0.0214033	0.024	0.816	0.0166008	0.806764	119	0.320592	0.00628878	0.005	0.003	0.00127951	0.00101633	0.391279	Non-monotone	FALSE	FALSE	FALSE	FALSE	FALSE	TRUE	FALSE	FALSE
pcodonTGTGGC	1343	0.109354	0.00979031	0.252	0.814	0.275773	0.808562	81	0.202439	0.02477	0.869	0.938	0.853224	0.910106	0.160276	MIC not significant	FALSE	FALSE	FALSE	FALSE	FALSE	FALSE	FALSE	FALSE
pcodonTGTGGA	1343	0.119466	0.0107121	0.048	0.413	0.0446158	0.42458	122	0.222225	0.00477348	0.529	0.481	0.571346	0.521452	0.449543	MIC not significant	FALSE	FALSE	FALSE	FALSE	FALSE	FALSE	FALSE	FALSE
pcodonTGTGGG	1343	0.108224	0.0124434	0.44	0.948	0.445726	0.942628	111	0.285122	0.00668133	0.131	0.121	0.134593	0.116838	0.393738	MIC not significant	FALSE	FALSE	FALSE	FALSE	FALSE	FALSE	FALSE	FALSE
pcodonTGCTTT	1343	0.131436	3.37893e-06	0.013	0.011	0.00802964	0.00556815	311	0.184898	0.00883642	0.475	0.617	0.499415	0.634307	0.0979776	MIC not significant	FALSE	FALSE	FALSE	FALSE	FALSE	FALSE	FALSE	FALSE
pcodonTGCTTC	1343	0.11882	0.00511574	0.134	0.306	0.141049	0.324545	190	0.198096	0.0181935	0.673	0.864	0.683305	0.857546	0.0635312	MIC not significant	FALSE	FALSE	FALSE	FALSE	FALSE	FALSE	FALSE	FALSE
pcodonTGCTTA	1343	0.123839	0.0225889	0.091	0.971	0.0894898	0.953314	295	0.221404	0.0644953	0.078	0.981	0.0597679	0.964822	1.00551e-05	MIC not significant	FALSE	FALSE	FALSE	FALSE	FALSE	FALSE	FALSE	FALSE
pcodonTGCTTG	1343	0.113474	0.00310367	0.446	0.574	0.448239	0.584022	230	0.190748	0.0019837	0.808	0.779	0.808754	0.776104	0.501509	MIC not significant	FALSE	FALSE	FALSE	FALSE	FALSE	FALSE	FALSE	FALSE
pcodonTGCTCT	1343	0.111887	0.00271129	0.283	0.398	0.285969	0.390843	115	0.215028	0.00475307	0.755	0.707	0.762892	0.723222	0.464095	MIC not significant	FALSE	FALSE	FALSE	FALSE	FALSE	FALSE	FALSE	FALSE
pcodonTGCTCC	1343	0.100386	0.00515384	0.87	0.964	0.861034	0.960067	118	0.227358	0.00623612	0.558	0.534	0.587989	0.561978	0.395314	MIC not significant	FALSE	FALSE	FALSE	FALSE	FALSE	FALSE	FALSE	FALSE
pcodonTGCTCG	1343	0.119671	0.0113713	0.07	0.502	0.068724	0.521591	151	0.243167	4.09092e-07	0.311	0.237	0.345465	0.256735	0.993781	MIC not significant	FALSE	FALSE	FALSE	FALSE	FALSE	FALSE	FALSE	FALSE
pcodonTGCTAT	1343	0.12686	0.0186817	0.02	0.576	0.0109274	0.595771	185	0.247421	0.054066	0.122	0.755	0.115568	0.760658	0.00144774	MIC not significant	FALSE	FALSE	FALSE	FALSE	FALSE	FALSE	FALSE	FALSE
pcodonTGCTAC	1343	0.108624	0.000371941	0.249	0.229	0.258681	0.233319	52	0.361322	0.0299187	0.09	0.115	0.0871545	0.122839	0.219429	MIC not significant	FALSE	FALSE	FALSE	FALSE	FALSE	FALSE	FALSE	FALSE
pcodonTGCTAA	1343	0.103363	0.000527462	0.616	0.591	0.638387	0.623221	50	0.264465	5.76489e-08	0.682	0.527	0.713664	0.561673	0.99868	MIC not significant	FALSE	FALSE	FALSE	FALSE	FALSE	FALSE	FALSE	FALSE
pcodonTGCTAG	1343	0.10831	0.00631125	0.356	0.687	0.387779	0.709687	101	0.220125	0.00149922	0.576	0.492	0.631308	0.548527	0.700661	MIC not significant	FALSE	FALSE	FALSE	FALSE	FALSE	FALSE	FALSE	FALSE
pcodonTGCTGT	1343	0.125634	0.00592484	0.00313158	0.0195395	0.00134026	0.0130452	86	0.24105	0.000398537	0.683	0.577	0.714974	0.62054	0.855236	MIC not significant	TRUE	FALSE	FALSE	FALSE	TRUE	FALSE	FALSE	FALSE
pcodonTGCTGC	1343	0.124302	0.00256317	0.019	0.027	0.0134271	0.0258312	148	0.344041	0.070863	0.00127632	0.0737763	7.909e-05	0.0642588	0.0010746	non-significant monotone/non-monotone	FALSE	TRUE	FALSE	FALSE	FALSE	TRUE	FALSE	FALSE
pcodonTGCTGA	1343	0.0991993	0.000120426	0.928	0.912	0.921065	0.905887	129	0.250312	0.0381145	0.348	0.752	0.388886	0.755675	0.0266109	MIC not significant	FALSE	FALSE	FALSE	FALSE	FALSE	FALSE	FALSE	FALSE
pcodonTGCTGG	1343	0.107746	0.00134878	0.638	0.668	0.65841	0.688555	188	0.321345	0.057902	0.001	0.019	2.83251e-06	0.010199	0.00087996	MIC not significant	FALSE	TRUE	FALSE	FALSE	FALSE	TRUE	FALSE	FALSE
pcodonTGCCTT	1343	0.119009	0.00607768	0.094	0.271	0.0940149	0.292041	161	0.264594	0.0542219	0.07	0.548	0.0489847	0.585711	0.00295325	MIC not significant	FALSE	FALSE	FALSE	FALSE	FALSE	FALSE	FALSE	FALSE
pcodonTGCCTC	1343	0.0999262	3.54646e-05	0.815	0.782	0.830738	0.80076	44	0.229203	0.00693857	0.698	0.588	0.725821	0.624268	0.589746	MIC not significant	FALSE	FALSE	FALSE	FALSE	FALSE	FALSE	FALSE	FALSE
pcodonTGCCTA	1343	0.112592	0.00437603	0.097	0.235	0.0959228	0.251848	57	0.287786	8.0009e-05	0.307	0.206	0.348424	0.219327	0.947366	MIC not significant	FALSE	FALSE	FALSE	FALSE	FALSE	FALSE	FALSE	FALSE
pcodonTGCCTG	1343	0.103405	0.000532166	0.58	0.575	0.619779	0.603153	60	0.20904	0.000378307	0.847	0.713	0.833527	0.729999	0.882734	MIC not significant	FALSE	FALSE	FALSE	FALSE	FALSE	FALSE	FALSE	FALSE
pcodonTGCCCT	1343	0.10932	0.0047269	0.374	0.601	0.378534	0.613348	117	0.262416	0.00658535	0.163	0.147	0.163838	0.146484	0.384418	MIC not significant	FALSE	FALSE	FALSE	FALSE	FALSE	FALSE	FALSE	FALSE
pcodonTGCCCG	1343	0.11087	0.00209733	0.196	0.251	0.186288	0.251905	70	0.204647	0.00092368	0.958	0.903	0.924112	0.876679	0.802775	MIC not significant	FALSE	FALSE	FALSE	FALSE	FALSE	FALSE	FALSE	FALSE
pcodonTGCCGT	1343	0.103112	0.000138424	0.616	0.579	0.629821	0.590013	51	0.3732	0.0494811	0.063	0.147	0.0550505	0.156364	0.116558	MIC not significant	FALSE	FALSE	FALSE	FALSE	FALSE	FALSE	FALSE	FALSE
pcodonTGCCGA	1343	0.111636	0.00244285	0.109	0.165	0.104948	0.168806	52	0.28439	0.0583351	0.474	0.812	0.535881	0.798149	0.0846317	MIC not significant	FALSE	FALSE	FALSE	FALSE	FALSE	FALSE	FALSE	FALSE
pcodonTGCCGG	1343	0.105337	5.1083e-05	0.46	0.419	0.481624	0.436936	59	0.333638	0.0956496	0.067	0.502	0.0586109	0.527112	0.017149	MIC not significant	FALSE	FALSE	FALSE	FALSE	FALSE	FALSE	FALSE	FALSE
pcodonTGCATT	1343	0.122571	0.00403834	0.082	0.158	0.0840637	0.172537	235	0.209978	0.0388391	0.394	0.939	0.418131	0.931826	0.00240669	MIC not significant	FALSE	FALSE	FALSE	FALSE	FALSE	FALSE	FALSE	FALSE
pcodonTGCATC	1343	0.108315	0.000391572	0.446	0.433	0.465751	0.446549	121	0.276761	0.00729018	0.075	0.074	0.0602341	0.0576606	0.35177	MIC not significant	FALSE	FALSE	FALSE	FALSE	FALSE	FALSE	FALSE	FALSE
pcodonTGCATA	1343	0.108775	0.000650249	0.334	0.33	0.35198	0.34483	94	0.31383	0.0366255	0.051	0.117	0.0297284	0.113461	0.0646356	MIC not significant	FALSE	FALSE	FALSE	FALSE	FALSE	FALSE	FALSE	FALSE
pcodonTGCATG	1343	0.135958	0.000105168	0.000947368	0.000723684	0.000356772	0.000241388	218	0.175708	2.33862e-05	0.919	0.876	0.909792	0.87299	0.943405	MIC not significant	TRUE	FALSE	FALSE	FALSE	TRUE	FALSE	FALSE	FALSE
pcodonTGCACT	1343	0.104595	3.0372e-05	0.528	0.472	0.553445	0.508115	69	0.262615	0.0186725	0.535	0.589	0.57717	0.620242	0.262883	MIC not significant	FALSE	FALSE	FALSE	FALSE	FALSE	FALSE	FALSE	FALSE
pcodonTGCACC	1343	0.110044	1.88954e-05	0.217	0.174	0.210593	0.172465	58	0.243893	0.109331	0.618	0.996	0.648168	0.98963	0.0112416	MIC not significant	FALSE	FALSE	FALSE	FALSE	FALSE	FALSE	FALSE	FALSE
pcodonTGCACG	1343	0.103573	0.00550172	0.64	0.882	0.667332	0.881244	90	0.255831	0.00599868	0.459	0.4	0.499101	0.442375	0.468092	MIC not significant	FALSE	FALSE	FALSE	FALSE	FALSE	FALSE	FALSE	FALSE
pcodonTGCAAC	1343	0.101433	5.49344e-05	0.742	0.697	0.750101	0.707359	50	0.212452	0.00833286	0.967	0.921	0.937033	0.906029	0.52726	MIC not significant	FALSE	FALSE	FALSE	FALSE	FALSE	FALSE	FALSE	FALSE
pcodonTGCAAG	1343	0.125547	0.0183922	0.026	0.623	0.0192608	0.639719	172	0.259579	0.00615447	0.037	0.043	0.0277862	0.0301355	0.306335	Non-monotone	FALSE	FALSE	FALSE	FALSE	FALSE	FALSE	FALSE	FALSE
pcodonTGCAGT	1343	0.109197	0.00141221	0.237	0.257	0.242633	0.274978	41	0.221838	1.09568e-05	0.827	0.688	0.828223	0.71293	0.983969	MIC not significant	FALSE	FALSE	FALSE	FALSE	FALSE	FALSE	FALSE	FALSE
pcodonTGCAGC	1343	0.106434	0.00755863	0.377	0.83	0.399523	0.831925	56	0.24998	0.0673585	0.605	0.939	0.645764	0.915517	0.0536735	MIC not significant	FALSE	FALSE	FALSE	FALSE	FALSE	FALSE	FALSE	FALSE
pcodonTGCAGA	1343	0.113278	0.000871182	0.077	0.083	0.0747045	0.0763616	55	0.282946	0.0659974	0.39	0.799	0.445822	0.797703	0.0583087	MIC not significant	FALSE	FALSE	FALSE	FALSE	FALSE	FALSE	FALSE	FALSE
pcodonTGCAGG	1343	0.120226	0.0030149	0.031	0.054	0.0268064	0.0553418	108	0.26912	0.0148598	0.284	0.334	0.321389	0.374175	0.208833	MIC not significant	FALSE	FALSE	FALSE	FALSE	FALSE	FALSE	FALSE	FALSE
pcodonTGCGTC	1343	0.10752	0.0094625	0.446	0.882	0.448963	0.879623	96	0.330337	0.0371401	0.023	0.052	0.00782823	0.0421245	0.0599475	MIC not significant	FALSE	FALSE	FALSE	FALSE	FALSE	FALSE	FALSE	FALSE
pcodonTGCGTG	1343	0.106419	2.05389e-05	0.404	0.358	0.416568	0.368164	76	0.261678	2.47164e-06	0.392	0.284	0.446469	0.32493	0.989246	MIC not significant	FALSE	FALSE	FALSE	FALSE	FALSE	FALSE	FALSE	FALSE
pcodonTGCGCT	1343	0.103751	0.00192147	0.555	0.657	0.572122	0.651254	60	0.222642	0.0077483	0.764	0.68	0.766798	0.700536	0.502637	MIC not significant	FALSE	FALSE	FALSE	FALSE	FALSE	FALSE	FALSE	FALSE
pcodonTGCGCC	1343	0.105905	0.00469603	0.461	0.691	0.480574	0.715998	80	0.249451	0.0461364	0.394	0.748	0.460608	0.761312	0.0557052	MIC not significant	FALSE	FALSE	FALSE	FALSE	FALSE	FALSE	FALSE	FALSE
pcodonTGCGCG	1343	0.114665	0.00984891	0.166	0.618	0.170482	0.636068	122	0.250993	0.00757891	0.2	0.203	0.22836	0.220788	0.340343	MIC not significant	FALSE	FALSE	FALSE	FALSE	FALSE	FALSE	FALSE	FALSE
pcodonTGCGAA	1343	0.109803	0.000276771	0.197	0.179	0.207327	0.182116	53	0.334172	0.0551147	0.148	0.323	0.164351	0.376209	0.0906266	MIC not significant	FALSE	FALSE	FALSE	FALSE	FALSE	FALSE	FALSE	FALSE
pcodonTGCGAG	1343	0.11603	0.0107089	0.034	0.394	0.0284733	0.42452	52	0.370018	0.0733444	0.078	0.242	0.0641264	0.285765	0.052148	MIC not significant	FALSE	FALSE	FALSE	FALSE	FALSE	FALSE	FALSE	FALSE
pcodonTGCGGT	1343	0.122717	0.000972598	0.028	0.029	0.0193671	0.0199831	126	0.272187	0.0270515	0.179	0.366	0.199314	0.403186	0.0657148	MIC not significant	FALSE	FALSE	FALSE	FALSE	FALSE	FALSE	FALSE	FALSE
pcodonTGCGGC	1343	0.0994024	0.00268004	0.875	0.925	0.872525	0.924397	107	0.352635	0.0136008	0.006	0.004	0.00204226	0.00239734	0.231591	MIC not significant	FALSE	FALSE	FALSE	FALSE	FALSE	TRUE	FALSE	FALSE
pcodonTGCGGA	1343	0.132275	0.00310108	0.001	0.003	0.000774759	0.0022326	161	0.210789	0.024877	0.613	0.882	0.66038	0.870092	0.0456917	MIC not significant	TRUE	FALSE	FALSE	FALSE	TRUE	FALSE	FALSE	FALSE
pcodonTGCGGG	1343	0.101639	0.000209803	0.808	0.784	0.806285	0.78143	106	0.253673	0.0237185	0.449	0.624	0.493337	0.656402	0.114973	MIC not significant	FALSE	FALSE	FALSE	FALSE	FALSE	FALSE	FALSE	FALSE
pcodonTGATTT	1343	0.123196	0.00967502	0.079	0.439	0.075431	0.450215	267	0.187257	0.0013005	0.707	0.658	0.715223	0.66668	0.557411	MIC not significant	FALSE	FALSE	FALSE	FALSE	FALSE	FALSE	FALSE	FALSE
pcodonTGATTC	1343	0.110326	0.00108076	0.436	0.457	0.45802	0.481121	155	0.181841	0.00324553	0.977	0.971	0.954651	0.943977	0.481373	MIC not significant	FALSE	FALSE	FALSE	FALSE	FALSE	FALSE	FALSE	FALSE
pcodonTGATTA	1343	0.117716	0.00213902	0.2	0.272	0.2056	0.265807	210	0.244275	0.0193101	0.06	0.175	0.0506457	0.16538	0.0442742	MIC not significant	FALSE	FALSE	FALSE	FALSE	FALSE	FALSE	FALSE	FALSE
pcodonTGATTG	1343	0.116468	0.0152742	0.21	0.906	0.217612	0.893883	196	0.235978	0.00196904	0.107	0.092	0.0972542	0.0794044	0.536862	MIC not significant	FALSE	FALSE	FALSE	FALSE	FALSE	FALSE	FALSE	FALSE
pcodonTGATCT	1343	0.109626	0.0107283	0.362	0.859	0.366838	0.86873	113	0.26372	0.0802077	0.229	0.956	0.245454	0.939238	0.00236914	MIC not significant	FALSE	FALSE	FALSE	FALSE	FALSE	FALSE	FALSE	FALSE
pcodonTGATCC	1343	0.104323	0.000301575	0.627	0.604	0.636653	0.614878	103	0.207676	0.000159247	0.949	0.904	0.925864	0.882886	0.899325	MIC not significant	FALSE	FALSE	FALSE	FALSE	FALSE	FALSE	FALSE	FALSE
pcodonTGATCA	1343	0.106746	0.00438115	0.373	0.601	0.378902	0.632462	57	0.208513	0.000547532	0.905	0.805	0.882017	0.804871	0.862831	MIC not significant	FALSE	FALSE	FALSE	FALSE	FALSE	FALSE	FALSE	FALSE
pcodonTGATCG	1343	0.105265	0.00211563	0.762	0.817	0.766521	0.823825	162	0.233621	3.44863e-05	0.273	0.207	0.296131	0.216891	0.940878	MIC not significant	FALSE	FALSE	FALSE	FALSE	FALSE	FALSE	FALSE	FALSE
pcodonTGATAT	1343	0.118838	2.85886e-06	0.089	0.07	0.0914381	0.0737772	158	0.203276	0.0103976	0.807	0.857	0.808226	0.850247	0.202354	MIC not significant	FALSE	FALSE	FALSE	FALSE	FALSE	FALSE	FALSE	FALSE
pcodonTGATAC	1343	0.123297	0.00899406	0.01	0.085	0.00464843	0.0856348	83	0.237567	0.0155536	0.797	0.825	0.795062	0.817851	0.261285	MIC not significant	FALSE	FALSE	FALSE	FALSE	TRUE	FALSE	FALSE	FALSE
pcodonTGATAA	1343	0.115246	0.00696582	0.045	0.238	0.0365504	0.242105	55	0.227211	0.00905754	0.815	0.758	0.819432	0.762852	0.48946	MIC not significant	FALSE	FALSE	FALSE	FALSE	FALSE	FALSE	FALSE	FALSE
pcodonTGATAG	1343	0.101141	0.00336861	0.861	0.928	0.848993	0.921164	128	0.216372	0.00106206	0.813	0.754	0.810921	0.755551	0.714973	MIC not significant	FALSE	FALSE	FALSE	FALSE	FALSE	FALSE	FALSE	FALSE
pcodonTGATGT	1343	0.114238	0.00916202	0.079	0.448	0.0762963	0.460959	75	0.252737	0.0285388	0.487	0.658	0.534217	0.672557	0.147372	MIC not significant	FALSE	FALSE	FALSE	FALSE	FALSE	FALSE	FALSE	FALSE
pcodonTGATGC	1343	0.113118	0.00144314	0.154	0.182	0.161971	0.188163	94	0.191348	0.00163752	0.962	0.917	0.935256	0.898925	0.698575	MIC not significant	FALSE	FALSE	FALSE	FALSE	FALSE	FALSE	FALSE	FALSE
pcodonTGATGA	1343	0.107641	0.00199092	0.538	0.609	0.55629	0.626734	139	0.215432	0.00285024	0.636	0.57	0.66558	0.611148	0.532501	MIC not significant	FALSE	FALSE	FALSE	FALSE	FALSE	FALSE	FALSE	FALSE
pcodonTGATGG	1343	0.114982	0.00206904	0.227	0.303	0.248124	0.313679	178	0.197395	0.00920941	0.862	0.903	0.839825	0.876742	0.20257	MIC not significant	FALSE	FALSE	FALSE	FALSE	FALSE	FALSE	FALSE	FALSE
pcodonTGACTT	1343	0.0983899	0.000798342	0.956	0.961	0.943172	0.945276	163	0.240777	0.0772095	0.198	0.991	0.209419	0.978112	0.00032911	MIC not significant	FALSE	FALSE	FALSE	FALSE	FALSE	FALSE	FALSE	FALSE
pcodonTGACTA	1343	0.111013	0.00143781	0.158	0.193	0.171719	0.201937	67	0.263141	0.0195652	0.635	0.694	0.666485	0.704079	0.25825	MIC not significant	FALSE	FALSE	FALSE	FALSE	FALSE	FALSE	FALSE	FALSE
pcodonTGACTG	1343	0.102738	0.00460691	0.663	0.866	0.68046	0.858348	76	0.293984	0.0132087	0.176	0.167	0.178038	0.1775	0.322857	MIC not significant	FALSE	FALSE	FALSE	FALSE	FALSE	FALSE	FALSE	FALSE
pcodonTGACCT	1343	0.110618	0.00206015	0.348	0.423	0.362809	0.436816	124	0.267381	0.036214	0.234	0.554	0.252655	0.59551	0.0342589	MIC not significant	FALSE	FALSE	FALSE	FALSE	FALSE	FALSE	FALSE	FALSE
pcodonTGACCC	1343	0.107689	0.000757491	0.302	0.312	0.326429	0.320105	46	0.227424	0.00537754	0.637	0.519	0.674733	0.565845	0.628155	MIC not significant	FALSE	FALSE	FALSE	FALSE	FALSE	FALSE	FALSE	FALSE
pcodonTGACCG	1343	0.110275	4.57066e-05	0.309	0.267	0.307784	0.272814	101	0.19728	0.00391779	0.87	0.814	0.854694	0.807249	0.534057	MIC not significant	FALSE	FALSE	FALSE	FALSE	FALSE	FALSE	FALSE	FALSE
pcodonTGACAG	1343	0.101366	0.000663715	0.731	0.726	0.74922	0.745275	42	0.292952	0.000356489	0.298	0.182	0.353892	0.212085	0.905529	MIC not significant	FALSE	FALSE	FALSE	FALSE	FALSE	FALSE	FALSE	FALSE
pcodonTGACGT	1343	0.110381	0.00219902	0.305	0.381	0.316703	0.395327	105	0.264694	0.00116865	0.375	0.286	0.409	0.320779	0.729188	MIC not significant	FALSE	FALSE	FALSE	FALSE	FALSE	FALSE	FALSE	FALSE
pcodonTGACGA	1343	0.0987732	0.00499243	0.878	0.977	0.861883	0.960337	91	0.227406	0.0342515	0.744	0.918	0.757449	0.906378	0.0790424	MIC not significant	FALSE	FALSE	FALSE	FALSE	FALSE	FALSE	FALSE	FALSE
pcodonTGACGG	1343	0.106358	0.0052146	0.53	0.763	0.547171	0.775803	108	0.213442	0.0167676	0.885	0.94	0.863981	0.91247	0.181657	MIC not significant	FALSE	FALSE	FALSE	FALSE	FALSE	FALSE	FALSE	FALSE
pcodonTGAATT	1343	0.125985	0.00239906	0.055	0.078	0.0393615	0.0647481	299	0.187916	0.00250346	0.56	0.533	0.574709	0.554234	0.388636	MIC not significant	FALSE	FALSE	FALSE	FALSE	FALSE	FALSE	FALSE	FALSE
pcodonTGAATC	1343	0.115763	0.000920238	0.181	0.192	0.184183	0.191676	151	0.273149	0.0271814	0.083	0.2	0.0673254	0.220496	0.0430775	MIC not significant	FALSE	FALSE	FALSE	FALSE	FALSE	FALSE	FALSE	FALSE
pcodonTGAATA	1343	0.113084	0.012728	0.182	0.822	0.188413	0.822211	103	0.288864	1.92995e-09	0.217	0.139	0.225702	0.147826	0.999649	MIC not significant	FALSE	FALSE	FALSE	FALSE	FALSE	FALSE	FALSE	FALSE
pcodonTGAATG	1343	0.125685	0.00669974	0.043	0.184	0.0382049	0.174403	257	0.189139	4.27597e-06	0.456	0.386	0.495234	0.413877	0.973684	MIC not significant	FALSE	FALSE	FALSE	FALSE	FALSE	FALSE	FALSE	FALSE
pcodonTGAACT	1343	0.104479	0.00500655	0.772	0.931	0.781429	0.918009	151	0.211911	0.00347999	0.786	0.739	0.789521	0.749492	0.471832	MIC not significant	FALSE	FALSE	FALSE	FALSE	FALSE	FALSE	FALSE	FALSE
pcodonTGAACC	1343	0.107397	0.0124415	0.517	0.969	0.533527	0.965894	118	0.193132	0.00474673	0.93	0.903	0.897588	0.877292	0.458498	MIC not significant	FALSE	FALSE	FALSE	FALSE	FALSE	FALSE	FALSE	FALSE
pcodonTGAACA	1343	0.116172	0.00183855	0.03	0.044	0.0270086	0.0403133	57	0.293429	0.00990591	0.281	0.224	0.302986	0.247638	0.461361	MIC not significant	FALSE	FALSE	FALSE	FALSE	FALSE	FALSE	FALSE	FALSE
pcodonTGAACG	1343	0.117201	0.0103229	0.234	0.72	0.249546	0.741618	214	0.242346	0.021948	0.052	0.187	0.0508776	0.201123	0.0302728	MIC not significant	FALSE	FALSE	FALSE	FALSE	FALSE	FALSE	FALSE	FALSE
pcodonTGAAAT	1343	0.119931	0.00585104	0.02	0.084	0.0145436	0.0795235	82	0.240608	0.00154805	0.799	0.708	0.80464	0.728451	0.725624	MIC not significant	FALSE	FALSE	FALSE	FALSE	FALSE	FALSE	FALSE	FALSE
pcodonTGAAAC	1343	0.111875	0.00219094	0.149	0.209	0.148853	0.210239	77	0.377608	0.00558826	0.007	0.006	0.000456533	0.000268435	0.518185	MIC not significant	FALSE	FALSE	FALSE	FALSE	FALSE	TRUE	FALSE	FALSE
pcodonTGAAAA	1343	0.11606	0.00872056	0.031	0.264	0.0193864	0.281328	44	0.250497	0.0192738	0.55	0.526	0.594805	0.568013	0.367554	MIC not significant	FALSE	FALSE	FALSE	FALSE	FALSE	FALSE	FALSE	FALSE
pcodonTGAAAG	1343	0.125905	0.0098055	0.028	0.245	0.0250103	0.248749	220	0.221102	0.0183999	0.168	0.377	0.185438	0.39504	0.0444526	MIC not significant	FALSE	FALSE	FALSE	FALSE	FALSE	FALSE	FALSE	FALSE
pcodonTGAAGT	1343	0.106087	0.0074511	0.493	0.87	0.507937	0.855841	87	0.240775	0.00668945	0.687	0.636	0.707925	0.653346	0.451386	MIC not significant	FALSE	FALSE	FALSE	FALSE	FALSE	FALSE	FALSE	FALSE
pcodonTGAAGC	1343	0.105861	0.000605355	0.514	0.512	0.530458	0.524852	93	0.260038	0.0214529	0.365	0.488	0.397145	0.526527	0.161229	MIC not significant	FALSE	FALSE	FALSE	FALSE	FALSE	FALSE	FALSE	FALSE
pcodonTGAAGA	1343	0.113524	0.00913843	0.109	0.505	0.102974	0.5197	73	0.240173	0.00845114	0.659	0.599	0.68012	0.627699	0.439206	MIC not significant	FALSE	FALSE	FALSE	FALSE	FALSE	FALSE	FALSE	FALSE
pcodonTGAAGG	1343	0.118059	0.0111687	0.131	0.632	0.130008	0.639269	171	0.229005	0.0203032	0.223	0.404	0.244563	0.449834	0.0630098	MIC not significant	FALSE	FALSE	FALSE	FALSE	FALSE	FALSE	FALSE	FALSE
pcodonTGAGTC	1343	0.114124	4.6891e-05	0.103	0.083	0.093445	0.0774127	76	0.240092	0.000330588	0.589	0.476	0.626198	0.511076	0.876117	MIC not significant	FALSE	FALSE	FALSE	FALSE	FALSE	FALSE	FALSE	FALSE
pcodonTGAGTG	1343	0.108335	0.00834051	0.386	0.825	0.39796	0.813221	94	0.30552	0.00438725	0.061	0.039	0.0484852	0.0302317	0.525892	MIC not significant	FALSE	FALSE	FALSE	FALSE	FALSE	FALSE	FALSE	FALSE
pcodonTGAGCT	1343	0.111967	0.00569272	0.382	0.679	0.40518	0.683421	177	0.249882	0.00637592	0.134	0.144	0.13897	0.144546	0.290745	MIC not significant	FALSE	FALSE	FALSE	FALSE	FALSE	FALSE	FALSE	FALSE
pcodonTGAGCC	1343	0.118107	0.00770113	0.093	0.361	0.0824562	0.363512	138	0.211311	0.0154894	0.697	0.814	0.723972	0.811068	0.145836	MIC not significant	FALSE	FALSE	FALSE	FALSE	FALSE	FALSE	FALSE	FALSE
pcodonTGAGCA	1343	0.132558	0.00422418	0.000105263	0.000434211	6.53165e-06	6.30306e-05	70	0.277851	0.0378414	0.397	0.624	0.445176	0.653916	0.106593	MIC not significant	TRUE	FALSE	FALSE	FALSE	TRUE	FALSE	FALSE	FALSE
pcodonTGAGCG	1343	0.117759	0.0072667	0.239	0.553	0.248895	0.580389	238	0.233408	0.0273973	0.086	0.362	0.0747432	0.37807	0.0105349	MIC not significant	FALSE	FALSE	FALSE	FALSE	FALSE	FALSE	FALSE	FALSE
pcodonTGAGAA	1343	0.106339	0.000912066	0.4	0.428	0.423375	0.436895	44	0.25939	0.0589789	0.473	0.778	0.522178	0.771331	0.112189	MIC not significant	FALSE	FALSE	FALSE	FALSE	FALSE	FALSE	FALSE	FALSE
pcodonTGAGGT	1343	0.124379	2.55936e-05	0.012	0.008	0.00592014	0.00428049	115	0.198541	0.000499917	0.916	0.851	0.890511	0.841947	0.812516	MIC not significant	FALSE	FALSE	FALSE	FALSE	TRUE	FALSE	FALSE	FALSE
pcodonTGAGGC	1343	0.112413	0.00206254	0.146	0.187	0.142132	0.189854	85	0.242686	0.0014197	0.724	0.63	0.745537	0.657124	0.73208	MIC not significant	FALSE	FALSE	FALSE	FALSE	FALSE	FALSE	FALSE	FALSE
pcodonTGAGGA	1343	0.1039	0.00290397	0.796	0.876	0.789656	0.86983	153	0.226279	0.00299092	0.527	0.473	0.561944	0.507993	0.50195	MIC not significant	FALSE	FALSE	FALSE	FALSE	FALSE	FALSE	FALSE	FALSE
pcodonTGAGGG	1343	0.11897	0.00399154	0.103	0.205	0.0965101	0.198687	154	0.271723	0.0104046	0.063	0.084	0.0537448	0.0709685	0.208104	MIC not significant	FALSE	FALSE	FALSE	FALSE	FALSE	FALSE	FALSE	FALSE
pcodonTGGTTT	1343	0.1251	0.0112277	0.072	0.414	0.0561553	0.433726	268	0.225759	1.18959e-06	0.061	0.048	0.0564214	0.0359672	0.985821	MIC not significant	FALSE	FALSE	FALSE	FALSE	FALSE	FALSE	FALSE	FALSE
pcodonTGGTTC	1343	0.114493	0.000370758	0.27	0.243	0.289266	0.268965	168	0.254114	0.0700442	0.068	0.854	0.0554706	0.849375	0.000526725	MIC not significant	FALSE	FALSE	FALSE	FALSE	FALSE	FALSE	FALSE	FALSE
pcodonTGGTTA	1343	0.121526	0.00082449	0.091	0.094	0.0813468	0.0835843	215	0.224854	0.0204717	0.202	0.438	0.20869	0.47691	0.0360359	MIC not significant	FALSE	FALSE	FALSE	FALSE	FALSE	FALSE	FALSE	FALSE
pcodonTGGTTG	1343	0.11622	0.00741738	0.254	0.576	0.249698	0.59527	197	0.200935	0.0125776	0.541	0.702	0.579522	0.707506	0.11664	MIC not significant	FALSE	FALSE	FALSE	FALSE	FALSE	FALSE	FALSE	FALSE
pcodonTGGTCT	1343	0.117329	0.00108861	0.133	0.139	0.113327	0.123362	125	0.220262	0.00120927	0.81	0.727	0.804507	0.740122	0.700235	MIC not significant	FALSE	FALSE	FALSE	FALSE	FALSE	FALSE	FALSE	FALSE
pcodonTGGTCC	1343	0.108638	0.000126745	0.488	0.455	0.503859	0.467703	131	0.243401	0.00550825	0.413	0.394	0.455013	0.420426	0.399519	MIC not significant	FALSE	FALSE	FALSE	FALSE	FALSE	FALSE	FALSE	FALSE
pcodonTGGTCA	1343	0.107119	0.00264948	0.377	0.498	0.383135	0.510051	57	0.278009	0.00426876	0.369	0.286	0.404575	0.310665	0.628323	MIC not significant	FALSE	FALSE	FALSE	FALSE	FALSE	FALSE	FALSE	FALSE
pcodonTGGTCG	1343	0.126858	1.81442e-05	0.015	0.013	0.0116453	0.00885996	175	0.267479	0.00107733	0.059	0.043	0.0491667	0.0349348	0.666317	MIC not significant	FALSE	FALSE	FALSE	FALSE	FALSE	FALSE	FALSE	FALSE
pcodonTGGTAT	1343	0.109987	3.04001e-05	0.481	0.443	0.489673	0.446695	163	0.191702	0.0130401	0.866	0.925	0.856234	0.910663	0.146654	MIC not significant	FALSE	FALSE	FALSE	FALSE	FALSE	FALSE	FALSE	FALSE
pcodonTGGTAC	1343	0.105785	0.00611718	0.437	0.809	0.451166	0.81635	45	0.182275	0.000388022	0.948	0.858	0.901974	0.829335	0.897806	MIC not significant	FALSE	FALSE	FALSE	FALSE	FALSE	FALSE	FALSE	FALSE
pcodonTGGTAA	1343	0.112727	0.0089197	0.096	0.484	0.0851921	0.512868	53	0.189206	0.00841273	0.987	0.969	0.966237	0.952043	0.513631	MIC not significant	FALSE	FALSE	FALSE	FALSE	FALSE	FALSE	FALSE	FALSE
pcodonTGGTAG	1343	0.125277	0.00397401	0.002	0.008	0.00123548	0.00546506	77	0.253471	0.056133	0.424	0.864	0.473203	0.85001	0.0380205	MIC not significant	TRUE	FALSE	FALSE	FALSE	TRUE	FALSE	FALSE	FALSE
pcodonTGGTGT	1343	0.117824	0.0222353	0.053	0.943	0.0369817	0.935678	98	0.277006	0.000426717	0.141	0.083	0.138003	0.0798028	0.84	MIC not significant	FALSE	FALSE	FALSE	FALSE	FALSE	FALSE	FALSE	FALSE
pcodonTGGTGC	1343	0.113087	0.00176153	0.312	0.352	0.308627	0.359967	155	0.274216	0.0350928	0.073	0.261	0.0598975	0.28653	0.019592	MIC not significant	FALSE	FALSE	FALSE	FALSE	FALSE	FALSE	FALSE	FALSE
pcodonTGGTGA	1343	0.115335	0.00266235	0.171	0.251	0.172576	0.251652	137	0.217759	0.00238476	0.613	0.546	0.635041	0.582226	0.570926	MIC not significant	FALSE	FALSE	FALSE	FALSE	FALSE	FALSE	FALSE	FALSE
pcodonTGGTGG	1343	0.127822	0.000157549	0.021	0.016	0.0166013	0.0126706	250	0.19708	0.0178883	0.424	0.711	0.458677	0.732205	0.0345464	MIC not significant	FALSE	FALSE	FALSE	FALSE	FALSE	FALSE	FALSE	FALSE
pcodonTGGCTT	1343	0.10374	8.53193e-05	0.907	0.888	0.90555	0.889637	257	0.219157	0.0039375	0.081	0.076	0.0745836	0.071542	0.316327	MIC not significant	FALSE	FALSE	FALSE	FALSE	FALSE	FALSE	FALSE	FALSE
pcodonTGGCTC	1343	0.112748	0.00151425	0.17	0.197	0.187512	0.217868	94	0.253491	0.000125728	0.414	0.31	0.446758	0.329238	0.914582	MIC not significant	FALSE	FALSE	FALSE	FALSE	FALSE	FALSE	FALSE	FALSE
pcodonTGGCTA	1343	0.123167	0.00440776	0.008	0.031	0.00612388	0.0246427	97	0.265042	0.00309836	0.234	0.175	0.258762	0.197745	0.588143	MIC not significant	FALSE	FALSE	FALSE	FALSE	TRUE	FALSE	FALSE	FALSE
pcodonTGGCTG	1343	0.11893	0.00462619	0.097	0.207	0.0802347	0.201803	144	0.207401	0.0127347	0.637	0.729	0.667826	0.744197	0.178083	MIC not significant	FALSE	FALSE	FALSE	FALSE	FALSE	FALSE	FALSE	FALSE
pcodonTGGCCT	1343	0.115468	0.0124951	0.368	0.902	0.380231	0.910412	251	0.207922	0.0484909	0.23	0.968	0.246288	0.957629	0.000440496	MIC not significant	FALSE	FALSE	FALSE	FALSE	FALSE	FALSE	FALSE	FALSE
pcodonTGGCCC	1343	0.123506	0.00364971	0.00228947	0.00703947	0.000687916	0.00319217	55	0.289366	0.0215479	0.35	0.383	0.388042	0.411997	0.284872	MIC not significant	TRUE	FALSE	FALSE	FALSE	TRUE	FALSE	FALSE	FALSE
pcodonTGGCCA	1343	0.0997138	0.00547141	0.835	0.978	0.829416	0.963532	49	0.211296	0.00144492	0.975	0.92	0.939082	0.886323	0.795396	MIC not significant	FALSE	FALSE	FALSE	FALSE	FALSE	FALSE	FALSE	FALSE
pcodonTGGCCG	1343	0.11917	0.00018231	0.114	0.104	0.109904	0.0949009	168	0.223769	0.0053871	0.327	0.324	0.359061	0.354256	0.344401	MIC not significant	FALSE	FALSE	FALSE	FALSE	FALSE	FALSE	FALSE	FALSE
pcodonTGGCAG	1343	0.102572	1.74678e-05	0.641	0.602	0.661719	0.619469	71	0.270332	0.0367199	0.409	0.633	0.457002	0.652228	0.109406	MIC not significant	FALSE	FALSE	FALSE	FALSE	FALSE	FALSE	FALSE	FALSE
pcodonTGGCGT	1343	0.106449	0.000377954	0.534	0.514	0.544452	0.525237	109	0.288363	0.0107574	0.126	0.124	0.122654	0.128569	0.283155	MIC not significant	FALSE	FALSE	FALSE	FALSE	FALSE	FALSE	FALSE	FALSE
pcodonTGGCGC	1343	0.100913	0.00318501	0.745	0.876	0.748737	0.864917	50	0.218177	0.00376057	0.95	0.884	0.919771	0.871248	0.672256	MIC not significant	FALSE	FALSE	FALSE	FALSE	FALSE	FALSE	FALSE	FALSE
pcodonTGGCGA	1343	0.124761	0.00456809	0.006	0.015	0.00166712	0.00976318	82	0.317787	0.000962161	0.168	0.105	0.161828	0.0963279	0.782056	MIC not significant	TRUE	FALSE	FALSE	FALSE	TRUE	FALSE	FALSE	FALSE
pcodonTGGCGG	1343	0.127636	0.00060754	0.003	0.002	0.00181452	0.00160351	115	0.270124	0.000409503	0.148	0.105	0.15385	0.098747	0.830032	MIC not significant	TRUE	FALSE	FALSE	FALSE	TRUE	FALSE	FALSE	FALSE
pcodonTGGATT	1343	0.123069	0.00702206	0.175	0.423	0.166405	0.446798	437	0.203768	0.0170838	0.01	0.081	0.00458782	0.0719058	0.00621434	MIC not significant	FALSE	FALSE	FALSE	FALSE	FALSE	TRUE	FALSE	FALSE
pcodonTGGATC	1343	0.117922	0.00459499	0.222	0.412	0.234769	0.434544	243	0.243158	0.0456371	0.027	0.416	0.0126884	0.455615	0.000803051	MIC not significant	FALSE	FALSE	FALSE	FALSE	FALSE	FALSE	FALSE	FALSE
pcodonTGGATA	1343	0.0990377	0.00427981	0.96	0.99	0.950029	0.985316	176	0.251003	0.00716551	0.142	0.153	0.140213	0.155519	0.263992	MIC not significant	FALSE	FALSE	FALSE	FALSE	FALSE	FALSE	FALSE	FALSE
pcodonTGGATG	1343	0.106546	0.0023585	0.908	0.945	0.904031	0.938411	398	0.150258	0.00167256	0.979	0.979	0.971294	0.968989	0.415836	MIC not significant	FALSE	FALSE	FALSE	FALSE	FALSE	FALSE	FALSE	FALSE
pcodonTGGACT	1343	0.107054	0.000938442	0.692	0.702	0.706068	0.717937	185	0.198449	0.00660748	0.737	0.766	0.753611	0.771255	0.271357	MIC not significant	FALSE	FALSE	FALSE	FALSE	FALSE	FALSE	FALSE	FALSE
pcodonTGGACC	1343	0.110235	0.00985034	0.557	0.946	0.578581	0.935863	208	0.205426	0.0260151	0.596	0.909	0.622293	0.899047	0.0199426	MIC not significant	FALSE	FALSE	FALSE	FALSE	FALSE	FALSE	FALSE	FALSE
pcodonTGGACA	1343	0.0991586	0.00115321	0.865	0.893	0.860521	0.876407	88	0.31438	0.00150525	0.097	0.063	0.097553	0.0573902	0.719202	MIC not significant	FALSE	FALSE	FALSE	FALSE	FALSE	FALSE	FALSE	FALSE
pcodonTGGACG	1343	0.128372	0.0317417	0.032	0.995	0.0276708	0.990651	311	0.229255	0.052644	0.006	0.553	0.00329485	0.585798	4.41533e-05	non-significant monotone/non-monotone	FALSE	FALSE	FALSE	FALSE	FALSE	TRUE	FALSE	FALSE
pcodonTGGAAT	1343	0.112027	0.00425188	0.187	0.343	0.20049	0.371255	92	0.348123	0.015512	0.019	0.025	0.00815954	0.00982841	0.236391	MIC not significant	FALSE	FALSE	FALSE	FALSE	FALSE	FALSE	FALSE	FALSE
pcodonTGGAAC	1343	0.114284	9.18707e-05	0.156	0.136	0.158798	0.136795	108	0.232744	0.0272565	0.676	0.876	0.699623	0.866024	0.0877298	MIC not significant	FALSE	FALSE	FALSE	FALSE	FALSE	FALSE	FALSE	FALSE
pcodonTGGAAA	1343	0.111038	0.00408598	0.176	0.335	0.181658	0.35174	66	0.324551	0.00399061	0.179	0.129	0.185033	0.128807	0.614329	MIC not significant	FALSE	FALSE	FALSE	FALSE	FALSE	FALSE	FALSE	FALSE
pcodonTGGAAG	1343	0.123757	0.01888	0.09	0.885	0.085699	0.878651	286	0.218399	0.0147304	0.041	0.12	0.0294093	0.112294	0.0402537	MIC not significant	FALSE	FALSE	FALSE	FALSE	FALSE	FALSE	FALSE	FALSE
pcodonTGGAGT	1343	0.12036	0.00169295	0.042	0.058	0.0358924	0.0502673	126	0.242374	7.72989e-05	0.488	0.383	0.539745	0.434753	0.922164	MIC not significant	FALSE	FALSE	FALSE	FALSE	FALSE	FALSE	FALSE	FALSE
pcodonTGGAGC	1343	0.114847	0.00981807	0.267	0.754	0.286293	0.757738	188	0.218083	0.0152995	0.363	0.53	0.407529	0.575194	0.0908071	MIC not significant	FALSE	FALSE	FALSE	FALSE	FALSE	FALSE	FALSE	FALSE
pcodonTGGAGA	1343	0.11785	0.00225048	0.059	0.091	0.0609739	0.0914861	106	0.211762	4.23066e-05	0.896	0.808	0.880491	0.818781	0.94724	MIC not significant	FALSE	FALSE	FALSE	FALSE	FALSE	FALSE	FALSE	FALSE
pcodonTGGAGG	1343	0.133089	0.00882314	0.006	0.054	0.00241212	0.0478715	280	0.2207	0.0243268	0.044	0.254	0.0388716	0.274875	0.00894299	non-significant monotone/non-monotone	TRUE	FALSE	FALSE	FALSE	TRUE	FALSE	FALSE	FALSE
pcodonTGGGTC	1343	0.113362	2.50726e-12	0.195	0.168	0.192855	0.160673	114	0.281937	0.00641084	0.114	0.098	0.103	0.0924921	0.397091	MIC not significant	FALSE	FALSE	FALSE	FALSE	FALSE	FALSE	FALSE	FALSE
pcodonTGGGTG	1343	0.104207	0.00190117	0.765	0.817	0.771864	0.818903	141	0.209836	8.55866e-05	0.694	0.592	0.707489	0.614549	0.9133	MIC not significant	FALSE	FALSE	FALSE	FALSE	FALSE	FALSE	FALSE	FALSE
pcodonTGGGCT	1343	0.105269	0.0055637	0.727	0.913	0.723686	0.899387	146	0.273311	0.000284608	0.026	0.017	0.0161522	0.00763132	0.839833	MIC not significant	FALSE	FALSE	FALSE	FALSE	FALSE	FALSE	FALSE	FALSE
pcodonTGGGCC	1343	0.104452	0.00186505	0.813	0.86	0.808382	0.847402	173	0.240815	0.011757	0.278	0.351	0.309141	0.395241	0.155601	MIC not significant	FALSE	FALSE	FALSE	FALSE	FALSE	FALSE	FALSE	FALSE
pcodonTGGGCA	1343	0.124801	0.00718913	0.002	0.017	0.000245564	0.00874266	52	0.427915	0.0452284	0.014	0.024	0.00347123	0.0124451	0.129911	Non-monotone	TRUE	FALSE	FALSE	FALSE	TRUE	TRUE	FALSE	FALSE
pcodonTGGGCG	1343	0.121557	0.00120092	0.133	0.137	0.122822	0.136453	265	0.230715	0.0459229	0.064	0.699	0.0421462	0.702842	0.000443249	MIC not significant	FALSE	FALSE	FALSE	FALSE	FALSE	FALSE	FALSE	FALSE
pcodonTGGGAC	1343	0.113648	0.000208035	0.066	0.057	0.0588148	0.047911	47	0.270753	0.000411882	0.725	0.583	0.740996	0.625031	0.892294	MIC not significant	FALSE	FALSE	FALSE	FALSE	FALSE	FALSE	FALSE	FALSE
pcodonTGGGAA	1343	0.100302	0.00309836	0.77	0.888	0.790591	0.885164	76	0.23957	0.00225284	0.638	0.521	0.661498	0.559609	0.68329	MIC not significant	FALSE	FALSE	FALSE	FALSE	FALSE	FALSE	FALSE	FALSE
pcodonTGGGAG	1343	0.102377	1.48031e-06	0.669	0.617	0.67925	0.641688	80	0.217345	0.000569461	0.721	0.624	0.748829	0.651727	0.833581	MIC not significant	FALSE	FALSE	FALSE	FALSE	FALSE	FALSE	FALSE	FALSE
pcodonTGGGGT	1343	0.122794	0.00515237	0.094	0.214	0.0842088	0.218855	242	0.164328	0.000826528	0.977	0.966	0.962973	0.948972	0.656311	MIC not significant	FALSE	FALSE	FALSE	FALSE	FALSE	FALSE	FALSE	FALSE
pcodonTGGGGC	1343	0.114983	0.000707855	0.276	0.269	0.286046	0.282585	191	0.21637	0.000211164	0.374	0.297	0.39562	0.31964	0.841855	MIC not significant	FALSE	FALSE	FALSE	FALSE	FALSE	FALSE	FALSE	FALSE
pcodonTGGGGA	1343	0.110844	3.17775e-06	0.598	0.563	0.604854	0.56621	247	0.201069	0.0335103	0.392	0.931	0.436602	0.909505	0.00389151	MIC not significant	FALSE	FALSE	FALSE	FALSE	FALSE	FALSE	FALSE	FALSE
pcodonTGGGGG	1343	0.107219	0.00450446	0.615	0.829	0.639562	0.81576	165	0.224134	0.00216417	0.381	0.33	0.421373	0.368959	0.552949	MIC not significant	FALSE	FALSE	FALSE	FALSE	FALSE	FALSE	FALSE	FALSE
pcodonCTTTTT	1343	0.124541	0.00583729	0.078	0.227	0.0724547	0.231469	308	0.16432	0.00427522	0.897	0.916	0.888988	0.904305	0.252597	MIC not significant	FALSE	FALSE	FALSE	FALSE	FALSE	FALSE	FALSE	FALSE
pcodonCTTTTC	1343	0.113792	5.20683e-07	0.351	0.308	0.351461	0.314029	185	0.196893	0.000726735	0.788	0.719	0.788945	0.729716	0.715672	MIC not significant	FALSE	FALSE	FALSE	FALSE	FALSE	FALSE	FALSE	FALSE
pcodonCTTTTA	1343	0.117327	0.00793723	0.338	0.703	0.345524	0.72373	305	0.191814	0.0144498	0.392	0.652	0.417321	0.67113	0.0358766	MIC not significant	FALSE	FALSE	FALSE	FALSE	FALSE	FALSE	FALSE	FALSE
pcodonCTTTTG	1343	0.108305	0.0136607	0.75	0.999	0.764757	0.994393	260	0.196604	0.000364952	0.542	0.475	0.580831	0.504602	0.759162	MIC not significant	FALSE	FALSE	FALSE	FALSE	FALSE	FALSE	FALSE	FALSE
pcodonCTTTCT	1343	0.100842	0.000985657	0.9	0.91	0.905214	0.911925	151	0.2676	0.0253906	0.135	0.288	0.128338	0.324313	0.0506669	MIC not significant	FALSE	FALSE	FALSE	FALSE	FALSE	FALSE	FALSE	FALSE
pcodonCTTTCC	1343	0.113189	0.00663658	0.155	0.429	0.152124	0.452334	104	0.293025	0.0739715	0.151	0.768	0.159913	0.781433	0.00522276	MIC not significant	FALSE	FALSE	FALSE	FALSE	FALSE	FALSE	FALSE	FALSE
pcodonCTTTCA	1343	0.106444	0.00108414	0.435	0.451	0.427633	0.446321	60	0.185369	0.00171404	0.971	0.923	0.939658	0.897409	0.753461	MIC not significant	FALSE	FALSE	FALSE	FALSE	FALSE	FALSE	FALSE	FALSE
pcodonCTTTCG	1343	0.114412	2.91517e-05	0.266	0.238	0.272146	0.239556	175	0.221696	0.046019	0.525	0.978	0.562954	0.965267	0.00436141	MIC not significant	FALSE	FALSE	FALSE	FALSE	FALSE	FALSE	FALSE	FALSE
pcodonCTTTAT	1343	0.119709	0.00190092	0.153	0.197	0.161611	0.205029	241	0.211187	0.0317645	0.282	0.81	0.293584	0.808354	0.00552571	MIC not significant	FALSE	FALSE	FALSE	FALSE	FALSE	FALSE	FALSE	FALSE
pcodonCTTTAC	1343	0.10454	0.00479774	0.529	0.769	0.543538	0.776657	67	0.306985	0.012719	0.25	0.243	0.290504	0.269253	0.36266	MIC not significant	FALSE	FALSE	FALSE	FALSE	FALSE	FALSE	FALSE	FALSE
pcodonCTTTAA	1343	0.113248	0.017138	0.146	0.926	0.144097	0.924888	86	0.264672	1.02894e-07	0.483	0.372	0.534197	0.415917	0.997661	MIC not significant	FALSE	FALSE	FALSE	FALSE	FALSE	FALSE	FALSE	FALSE
pcodonCTTTAG	1343	0.11937	0.0126865	0.062	0.509	0.0509416	0.535469	131	0.288198	0.000234724	0.061	0.044	0.0522431	0.0333806	0.862115	MIC not significant	FALSE	FALSE	FALSE	FALSE	FALSE	FALSE	FALSE	FALSE
pcodonCTTTGT	1343	0.116531	0.00407573	0.096	0.197	0.0922229	0.20103	111	0.254143	0.000256183	0.384	0.279	0.423404	0.314523	0.867581	MIC not significant	FALSE	FALSE	FALSE	FALSE	FALSE	FALSE	FALSE	FALSE
pcodonCTTTGC	1343	0.114401	0.00421494	0.253	0.424	0.264103	0.450347	162	0.263261	0.0648135	0.069	0.708	0.0580196	0.726081	0.00107819	MIC not significant	FALSE	FALSE	FALSE	FALSE	FALSE	FALSE	FALSE	FALSE
pcodonCTTTGA	1343	0.117924	0.00280902	0.171	0.242	0.163246	0.246992	189	0.217978	0.00398464	0.355	0.33	0.384071	0.361586	0.388184	MIC not significant	FALSE	FALSE	FALSE	FALSE	FALSE	FALSE	FALSE	FALSE
pcodonCTTTGG	1343	0.108054	0.00103881	0.749	0.762	0.756887	0.770405	255	0.187635	0.00519013	0.552	0.58	0.599342	0.625381	0.251685	MIC not significant	FALSE	FALSE	FALSE	FALSE	FALSE	FALSE	FALSE	FALSE
pcodonCTTCTT	1343	0.119594	2.7431e-07	0.18	0.16	0.18515	0.156958	274	0.192202	0.00277829	0.468	0.458	0.529307	0.507262	0.384785	MIC not significant	FALSE	FALSE	FALSE	FALSE	FALSE	FALSE	FALSE	FALSE
pcodonCTTCTC	1343	0.111088	0.000546107	0.149	0.144	0.157079	0.146231	66	0.308696	0.137762	0.259	0.994	0.286795	0.982277	0.00215403	MIC not significant	FALSE	FALSE	FALSE	FALSE	FALSE	FALSE	FALSE	FALSE
pcodonCTTCTA	1343	0.122273	0.0208639	0.048	0.891	0.0452042	0.884349	175	0.250879	0.000242634	0.144	0.103	0.161547	0.115958	0.837888	MIC not significant	FALSE	FALSE	FALSE	FALSE	FALSE	FALSE	FALSE	FALSE
pcodonCTTCTG	1343	0.100702	4.00379e-06	0.844	0.812	0.835575	0.808523	109	0.321541	0.034661	0.034	0.083	0.0145635	0.0737809	0.0525876	MIC not significant	FALSE	FALSE	FALSE	FALSE	FALSE	FALSE	FALSE	FALSE
pcodonCTTCCT	1343	0.105033	0.000530335	0.772	0.762	0.775472	0.766077	170	0.219966	0.0140653	0.34	0.444	0.35717	0.488388	0.123475	MIC not significant	FALSE	FALSE	FALSE	FALSE	FALSE	FALSE	FALSE	FALSE
pcodonCTTCCC	1343	0.101102	9.83687e-05	0.759	0.726	0.778902	0.743517	48	0.329957	0.0703298	0.319	0.664	0.351956	0.679118	0.0687368	MIC not significant	FALSE	FALSE	FALSE	FALSE	FALSE	FALSE	FALSE	FALSE
pcodonCTTCCG	1343	0.0956389	0.00101947	0.973	0.977	0.970119	0.972665	126	0.226801	0.00549843	0.728	0.707	0.740014	0.718989	0.409264	MIC not significant	FALSE	FALSE	FALSE	FALSE	FALSE	FALSE	FALSE	FALSE
pcodonCTTCAG	1343	0.104027	0.00258029	0.584	0.69	0.606251	0.710132	78	0.254839	0.0104897	0.397	0.381	0.43844	0.423611	0.372239	MIC not significant	FALSE	FALSE	FALSE	FALSE	FALSE	FALSE	FALSE	FALSE
pcodonCTTCGT	1343	0.110455	0.00482955	0.342	0.585	0.365588	0.601982	125	0.207576	0.00171459	0.925	0.869	0.903765	0.855151	0.646596	MIC not significant	FALSE	FALSE	FALSE	FALSE	FALSE	FALSE	FALSE	FALSE
pcodonCTTCGA	1343	0.114008	0.00606748	0.162	0.388	0.157073	0.406907	103	0.28906	0.00374167	0.185	0.149	0.190136	0.143081	0.539349	MIC not significant	FALSE	FALSE	FALSE	FALSE	FALSE	FALSE	FALSE	FALSE
pcodonCTTCGG	1343	0.107002	0.00628784	0.376	0.723	0.403357	0.734432	74	0.262961	0.0118641	0.414	0.408	0.476423	0.457567	0.35481	MIC not significant	FALSE	FALSE	FALSE	FALSE	FALSE	FALSE	FALSE	FALSE
pcodonCTTATT	1343	0.10944	0.000499897	0.823	0.806	0.824196	0.812376	392	0.162189	0.0141594	0.689	0.94	0.709127	0.920091	0.0184332	MIC not significant	FALSE	FALSE	FALSE	FALSE	FALSE	FALSE	FALSE	FALSE
pcodonCTTATC	1343	0.103254	7.32594e-05	0.844	0.823	0.84453	0.821536	176	0.222266	9.63164e-05	0.486	0.393	0.52017	0.430171	0.897141	MIC not significant	FALSE	FALSE	FALSE	FALSE	FALSE	FALSE	FALSE	FALSE
pcodonCTTATA	1343	0.113836	0.00753615	0.309	0.7	0.317761	0.695928	182	0.260775	0.0125457	0.04	0.068	0.034206	0.0609602	0.132222	MIC not significant	FALSE	FALSE	FALSE	FALSE	FALSE	FALSE	FALSE	FALSE
pcodonCTTATG	1343	0.12272	0.00725172	0.119	0.377	0.10907	0.389329	307	0.217575	0.00611411	0.054	0.06	0.0382373	0.0541785	0.171766	MIC not significant	FALSE	FALSE	FALSE	FALSE	FALSE	FALSE	FALSE	FALSE
pcodonCTTACT	1343	0.108354	0.000390018	0.449	0.432	0.484936	0.463555	126	0.228988	0.0103875	0.671	0.699	0.693058	0.723685	0.256125	MIC not significant	FALSE	FALSE	FALSE	FALSE	FALSE	FALSE	FALSE	FALSE
pcodonCTTACC	1343	0.10893	0.00519147	0.418	0.668	0.425475	0.680561	116	0.258374	0.00328182	0.233	0.18	0.260273	0.205293	0.541318	MIC not significant	FALSE	FALSE	FALSE	FALSE	FALSE	FALSE	FALSE	FALSE
pcodonCTTACA	1343	0.105888	0.00744487	0.433	0.874	0.457175	0.867412	44	0.255301	0.0349814	0.477	0.612	0.55915	0.642695	0.223329	MIC not significant	FALSE	FALSE	FALSE	FALSE	FALSE	FALSE	FALSE	FALSE
pcodonCTTACG	1343	0.125767	0.0212418	0.033	0.822	0.025802	0.822604	208	0.24181	0.0164896	0.109	0.198	0.0983511	0.213554	0.0645329	MIC not significant	FALSE	FALSE	FALSE	FALSE	FALSE	FALSE	FALSE	FALSE
pcodonCTTAAT	1343	0.10768	0.00839786	0.348	0.826	0.385933	0.815336	79	0.221874	0.000448006	0.709	0.567	0.724967	0.612468	0.853111	MIC not significant	FALSE	FALSE	FALSE	FALSE	FALSE	FALSE	FALSE	FALSE
pcodonCTTAAC	1343	0.106257	0.000625581	0.506	0.498	0.536225	0.526348	97	0.292778	0.0425562	0.094	0.299	0.0867686	0.322616	0.0426361	MIC not significant	FALSE	FALSE	FALSE	FALSE	FALSE	FALSE	FALSE	FALSE
pcodonCTTAAA	1343	0.105053	0.00597221	0.476	0.833	0.499427	0.833241	47	0.37904	0.0395112	0.133	0.187	0.129014	0.200024	0.17991	MIC not significant	FALSE	FALSE	FALSE	FALSE	FALSE	FALSE	FALSE	FALSE
pcodonCTTAAG	1343	0.135691	0.0210355	0.002	0.368	0.000853151	0.383381	263	0.194049	0.0218816	0.579	0.9	0.607701	0.889744	0.0163626	MIC not significant	TRUE	FALSE	FALSE	FALSE	TRUE	FALSE	FALSE	FALSE
pcodonCTTAGT	1343	0.104424	0.00259518	0.566	0.695	0.594404	0.706365	88	0.309863	0.00516563	0.117	0.099	0.106712	0.0809132	0.505767	MIC not significant	FALSE	FALSE	FALSE	FALSE	FALSE	FALSE	FALSE	FALSE
pcodonCTTAGC	1343	0.108103	0.0137173	0.497	0.987	0.518411	0.97559	126	0.224605	0.0142961	0.717	0.795	0.725285	0.802706	0.182353	MIC not significant	FALSE	FALSE	FALSE	FALSE	FALSE	FALSE	FALSE	FALSE
pcodonCTTAGA	1343	0.0987684	0.00274314	0.871	0.932	0.876699	0.92724	109	0.221099	0.00918273	0.795	0.782	0.799816	0.801823	0.321584	MIC not significant	FALSE	FALSE	FALSE	FALSE	FALSE	FALSE	FALSE	FALSE
pcodonCTTAGG	1343	0.118764	0.00492013	0.161	0.336	0.168373	0.35009	220	0.205164	0.0236318	0.415	0.773	0.434182	0.774158	0.0225654	MIC not significant	FALSE	FALSE	FALSE	FALSE	FALSE	FALSE	FALSE	FALSE
pcodonCTTGTC	1343	0.113335	0.00352012	0.214	0.343	0.229734	0.362496	125	0.253435	0.0390011	0.371	0.782	0.408352	0.78324	0.0272737	MIC not significant	FALSE	FALSE	FALSE	FALSE	FALSE	FALSE	FALSE	FALSE
pcodonCTTGTG	1343	0.121079	0.00231789	0.051	0.073	0.038159	0.0596281	151	0.224967	0.00586865	0.594	0.59	0.632102	0.624205	0.349832	MIC not significant	FALSE	FALSE	FALSE	FALSE	FALSE	FALSE	FALSE	FALSE
pcodonCTTGCT	1343	0.11746	0.00554464	0.086	0.253	0.085978	0.255786	121	0.180844	0.000235741	0.965	0.923	0.942205	0.908132	0.867253	MIC not significant	FALSE	FALSE	FALSE	FALSE	FALSE	FALSE	FALSE	FALSE
pcodonCTTGCC	1343	0.100621	0.00142671	0.821	0.844	0.817167	0.842944	99	0.291576	0.0808063	0.076	0.673	0.0725618	0.700678	0.00435065	MIC not significant	FALSE	FALSE	FALSE	FALSE	FALSE	FALSE	FALSE	FALSE
pcodonCTTGCA	1343	0.110094	0.00877323	0.224	0.675	0.228316	0.697571	69	0.253239	1.24317e-05	0.629	0.508	0.65955	0.54858	0.977062	MIC not significant	FALSE	FALSE	FALSE	FALSE	FALSE	FALSE	FALSE	FALSE
pcodonCTTGCG	1343	0.104373	0.000845692	0.804	0.807	0.797897	0.802096	165	0.282905	0.0131448	0.008	0.017	0.00403611	0.00916023	0.142551	MIC not significant	FALSE	FALSE	FALSE	FALSE	FALSE	TRUE	FALSE	FALSE
pcodonCTTGAA	1343	0.105278	2.19629e-05	0.575	0.531	0.605926	0.567166	102	0.242408	0.00278087	0.681	0.593	0.714139	0.642717	0.598618	MIC not significant	FALSE	FALSE	FALSE	FALSE	FALSE	FALSE	FALSE	FALSE
pcodonCTTGAG	1343	0.105816	2.51065e-05	0.411	0.376	0.45972	0.412587	55	0.288656	0.117267	0.355	0.976	0.394749	0.952731	0.0104919	MIC not significant	FALSE	FALSE	FALSE	FALSE	FALSE	FALSE	FALSE	FALSE
pcodonCTTGGT	1343	0.117768	0.000195115	0.185	0.156	0.190294	0.16328	211	0.258449	0.0133052	0.017	0.039	0.00937372	0.0256199	0.0946909	MIC not significant	FALSE	FALSE	FALSE	FALSE	FALSE	FALSE	FALSE	FALSE
pcodonCTTGGC	1343	0.128426	0.00270556	0.004	0.009	0.00238441	0.00589101	151	0.269934	0.000165648	0.1	0.071	0.0930058	0.0595299	0.875365	MIC not significant	TRUE	FALSE	FALSE	FALSE	TRUE	FALSE	FALSE	FALSE
pcodonCTTGGA	1343	0.115544	0.00994479	0.373	0.833	0.379187	0.835081	265	0.232236	0.0464503	0.046	0.652	0.0364932	0.664929	0.000410103	MIC not significant	FALSE	FALSE	FALSE	FALSE	FALSE	FALSE	FALSE	FALSE
pcodonCTTGGG	1343	0.0975871	0.00137383	0.987	0.99	0.976916	0.981924	206	0.25981	0.00172908	0.031	0.025	0.0147027	0.00968705	0.552885	MIC not significant	FALSE	FALSE	FALSE	FALSE	FALSE	FALSE	FALSE	FALSE
pcodonCTCTTT	1343	0.106893	7.1078e-05	0.396	0.364	0.415213	0.372052	81	0.260152	0.00428047	0.281	0.215	0.301976	0.231928	0.561714	MIC not significant	FALSE	FALSE	FALSE	FALSE	FALSE	FALSE	FALSE	FALSE
pcodonCTCTTC	1343	0.105992	6.09401e-05	0.402	0.361	0.430209	0.388982	66	0.378429	0.122275	0.047	0.597	0.0242223	0.617695	0.00400232	MIC not significant	FALSE	FALSE	FALSE	FALSE	FALSE	FALSE	FALSE	FALSE
pcodonCTCTTA	1343	0.124697	0.00688941	0.006	0.047	0.00269702	0.0346394	100	0.217208	0.0453848	0.682	0.96	0.716221	0.937291	0.0333304	MIC not significant	TRUE	FALSE	FALSE	FALSE	TRUE	FALSE	FALSE	FALSE
pcodonCTCTTG	1343	0.118093	0.00543274	0.031	0.096	0.0165662	0.0841311	68	0.269406	0.0163444	0.506	0.52	0.547278	0.568225	0.298822	MIC not significant	FALSE	FALSE	FALSE	FALSE	FALSE	FALSE	FALSE	FALSE
pcodonCTCTCG	1343	0.107587	0.00251709	0.31	0.417	0.329974	0.451049	44	0.240758	0.00330709	0.591	0.442	0.634612	0.490664	0.710797	MIC not significant	FALSE	FALSE	FALSE	FALSE	FALSE	FALSE	FALSE	FALSE
pcodonCTCTAT	1343	0.103025	0.000162019	0.64	0.6	0.639926	0.609001	69	0.222392	0.0486224	0.889	0.986	0.86538	0.966164	0.0686569	MIC not significant	FALSE	FALSE	FALSE	FALSE	FALSE	FALSE	FALSE	FALSE
pcodonCTCTGC	1343	0.113912	0.00542532	0.075	0.212	0.0641293	0.229474	53	0.319764	0.135962	0.239	0.964	0.244222	0.943741	0.00689174	MIC not significant	FALSE	FALSE	FALSE	FALSE	FALSE	FALSE	FALSE	FALSE
pcodonCTCTGA	1343	0.114332	3.60792e-05	0.049	0.038	0.0444114	0.0306328	44	0.261154	0.00432344	0.452	0.326	0.486445	0.361968	0.671523	MIC not significant	FALSE	FALSE	FALSE	FALSE	FALSE	FALSE	FALSE	FALSE
pcodonCTCTGG	1343	0.118716	0.0133161	0.038	0.516	0.0324087	0.521469	87	0.322077	0.0346291	0.064	0.133	0.050243	0.13796	0.0843969	MIC not significant	FALSE	FALSE	FALSE	FALSE	FALSE	FALSE	FALSE	FALSE
pcodonCTCCTT	1343	0.106724	0.000947622	0.389	0.407	0.416164	0.42823	68	0.283164	0.0337626	0.406	0.568	0.447668	0.606692	0.133635	MIC not significant	FALSE	FALSE	FALSE	FALSE	FALSE	FALSE	FALSE	FALSE
pcodonCTCCTG	1343	0.0975788	0.000264001	0.921	0.91	0.91292	0.898411	49	0.397429	0.113774	0.065	0.454	0.0454693	0.48866	0.0177833	MIC not significant	FALSE	FALSE	FALSE	FALSE	FALSE	FALSE	FALSE	FALSE
pcodonCTCCCT	1343	0.105854	0.00221969	0.417	0.52	0.433231	0.541316	52	0.285509	0.101714	0.481	0.972	0.527144	0.949228	0.021198	MIC not significant	FALSE	FALSE	FALSE	FALSE	FALSE	FALSE	FALSE	FALSE
pcodonCTCATT	1343	0.111807	1.25769e-06	0.222	0.198	0.244269	0.208467	97	0.365414	0.030227	0.009	0.011	0.000409271	0.00253126	0.0885472	MIC not significant	FALSE	FALSE	FALSE	FALSE	FALSE	TRUE	FALSE	FALSE
pcodonCTCATC	1343	0.101944	9.37624e-05	0.684	0.637	0.709352	0.670595	51	0.308726	0.00125213	0.346	0.242	0.398462	0.270353	0.805284	MIC not significant	FALSE	FALSE	FALSE	FALSE	FALSE	FALSE	FALSE	FALSE
pcodonCTCATG	1343	0.106978	0.000134071	0.432	0.389	0.454843	0.413743	90	0.279898	0.0448585	0.235	0.553	0.261133	0.591644	0.0450695	MIC not significant	FALSE	FALSE	FALSE	FALSE	FALSE	FALSE	FALSE	FALSE
pcodonCTCACG	1343	0.104652	0.00409515	0.517	0.781	0.558575	0.78882	40	0.240414	0.00867892	0.694	0.59	0.731615	0.635647	0.567483	MIC not significant	FALSE	FALSE	FALSE	FALSE	FALSE	FALSE	FALSE	FALSE
pcodonCTCAAG	1343	0.118766	0.0115009	0.028	0.395	0.0255884	0.394026	87	0.271846	0.0394953	0.377	0.673	0.412653	0.693656	0.0649923	MIC not significant	FALSE	FALSE	FALSE	FALSE	FALSE	FALSE	FALSE	FALSE
pcodonCTCAGG	1343	0.102181	0.000715324	0.674	0.672	0.688577	0.690024	63	0.255383	0.00379612	0.795	0.711	0.792186	0.72501	0.631442	MIC not significant	FALSE	FALSE	FALSE	FALSE	FALSE	FALSE	FALSE	FALSE
pcodonCTCGTG	1343	0.108223	0.00424499	0.26	0.482	0.272766	0.507096	52	0.334581	0.0140222	0.184	0.169	0.196834	0.172994	0.401983	MIC not significant	FALSE	FALSE	FALSE	FALSE	FALSE	FALSE	FALSE	FALSE
pcodonCTCGCT	1343	0.103422	0.00190842	0.609	0.696	0.642826	0.725576	40	0.252497	0.0137074	0.64	0.581	0.691749	0.619547	0.471851	MIC not significant	FALSE	FALSE	FALSE	FALSE	FALSE	FALSE	FALSE	FALSE
pcodonCTCGCC	1343	0.116208	0.00548488	0.026	0.108	0.017179	0.111767	47	0.325633	0.000416565	0.348	0.238	0.413553	0.27914	0.891687	MIC not significant	FALSE	FALSE	FALSE	FALSE	FALSE	FALSE	FALSE	FALSE
pcodonCTCGCG	1343	0.102581	0.00047003	0.632	0.615	0.654936	0.641612	67	0.257036	0.0243924	0.675	0.748	0.699598	0.759965	0.206913	MIC not significant	FALSE	FALSE	FALSE	FALSE	FALSE	FALSE	FALSE	FALSE
pcodonCTCGGT	1343	0.107137	0.000362465	0.361	0.333	0.382835	0.351622	53	0.377747	0.123025	0.06	0.536	0.0442543	0.580659	0.0103729	MIC not significant	FALSE	FALSE	FALSE	FALSE	FALSE	FALSE	FALSE	FALSE
pcodonCTCGGC	1343	0.112609	0.00961605	0.102	0.568	0.100253	0.592527	57	0.267971	0.0258003	0.434	0.516	0.49154	0.561514	0.232637	MIC not significant	FALSE	FALSE	FALSE	FALSE	FALSE	FALSE	FALSE	FALSE
pcodonCTCGGA	1343	0.098132	0.00185179	0.874	0.91	0.871258	0.904436	78	0.233335	0.0325457	0.632	0.825	0.649496	0.816549	0.113978	MIC not significant	FALSE	FALSE	FALSE	FALSE	FALSE	FALSE	FALSE	FALSE
pcodonCTCGGG	1343	0.10032	0.00118105	0.77	0.804	0.784622	0.809732	48	0.362314	0.014181	0.141	0.124	0.156104	0.125947	0.418947	MIC not significant	FALSE	FALSE	FALSE	FALSE	FALSE	FALSE	FALSE	FALSE
pcodonCTATTT	1343	0.119904	0.0181251	0.047	0.803	0.0383231	0.808967	129	0.261382	0.00414644	0.245	0.206	0.27014	0.220673	0.468454	MIC not significant	FALSE	FALSE	FALSE	FALSE	FALSE	FALSE	FALSE	FALSE
pcodonCTATTC	1343	0.117104	0.00605292	0.048	0.17	0.0430456	0.186953	86	0.296176	0.00021137	0.209	0.146	0.238812	0.154577	0.894305	MIC not significant	FALSE	FALSE	FALSE	FALSE	FALSE	FALSE	FALSE	FALSE
pcodonCTATTA	1343	0.123249	0.0111608	0.006	0.126	0.00261693	0.124169	86	0.248321	0.000100767	0.656	0.562	0.69082	0.591364	0.926912	MIC not significant	TRUE	FALSE	FALSE	FALSE	TRUE	FALSE	FALSE	FALSE
pcodonCTATTG	1343	0.12959	0.0227368	0.003	0.481	0.00035738	0.486636	109	0.237979	0.0260923	0.582	0.779	0.616076	0.779572	0.0933411	MIC not significant	TRUE	FALSE	FALSE	FALSE	TRUE	FALSE	FALSE	FALSE
pcodonCTATCT	1343	0.109824	0.005783	0.188	0.501	0.197503	0.524828	48	0.269816	0.00561035	0.745	0.629	0.747788	0.653828	0.611856	MIC not significant	FALSE	FALSE	FALSE	FALSE	FALSE	FALSE	FALSE	FALSE
pcodonCTATCC	1343	0.106487	0.00415778	0.365	0.641	0.392581	0.662574	40	0.268828	0.000410653	0.517	0.343	0.563545	0.403755	0.901226	MIC not significant	FALSE	FALSE	FALSE	FALSE	FALSE	FALSE	FALSE	FALSE
pcodonCTATCG	1343	0.105982	0.00549921	0.376	0.749	0.41609	0.75316	50	0.297522	0.0201766	0.452	0.463	0.506777	0.503692	0.325115	MIC not significant	FALSE	FALSE	FALSE	FALSE	FALSE	FALSE	FALSE	FALSE
pcodonCTATAT	1343	0.10861	0.00791923	0.267	0.717	0.279626	0.736617	61	0.216045	0.00233109	0.79	0.675	0.791786	0.694385	0.711096	MIC not significant	FALSE	FALSE	FALSE	FALSE	FALSE	FALSE	FALSE	FALSE
pcodonCTATAG	1343	0.118745	0.005305	0.011	0.062	0.00617181	0.0464022	40	0.205006	0.00554996	0.917	0.827	0.889441	0.821103	0.64777	MIC not significant	FALSE	FALSE	FALSE	FALSE	TRUE	FALSE	FALSE	FALSE
pcodonCTATGT	1343	0.116397	0.01034	0.026	0.36	0.0177841	0.379287	43	0.279779	0.0360064	0.336	0.409	0.387685	0.473239	0.222943	MIC not significant	FALSE	FALSE	FALSE	FALSE	FALSE	FALSE	FALSE	FALSE
pcodonCTATGC	1343	0.117649	0.00355074	0.017	0.038	0.00770352	0.0302812	41	0.302746	0.00280494	0.278	0.17	0.315751	0.185304	0.74155	MIC not significant	FALSE	FALSE	FALSE	FALSE	FALSE	FALSE	FALSE	FALSE
pcodonCTATGA	1343	0.11187	0.0127226	0.114	0.819	0.119851	0.818394	54	0.211499	0.0116618	0.939	0.911	0.900111	0.879674	0.437001	MIC not significant	FALSE	FALSE	FALSE	FALSE	FALSE	FALSE	FALSE	FALSE
pcodonCTATGG	1343	0.115477	0.00261835	0.094	0.144	0.0852037	0.14044	92	0.249931	0.0233031	0.473	0.633	0.519143	0.652142	0.146304	MIC not significant	FALSE	FALSE	FALSE	FALSE	FALSE	FALSE	FALSE	FALSE
pcodonCTACTT	1343	0.119834	0.0146543	0.107	0.755	0.105171	0.761003	183	0.232317	0.000914788	0.283	0.214	0.296281	0.235484	0.684418	MIC not significant	FALSE	FALSE	FALSE	FALSE	FALSE	FALSE	FALSE	FALSE
pcodonCTACTA	1343	0.115102	0.0167006	0.134	0.895	0.124034	0.888792	109	0.295211	0.0356588	0.101	0.277	0.0977235	0.294937	0.0492407	MIC not significant	FALSE	FALSE	FALSE	FALSE	FALSE	FALSE	FALSE	FALSE
pcodonCTACTG	1343	0.102239	0.00416676	0.696	0.875	0.707332	0.87329	58	0.224289	0.0110034	0.801	0.755	0.790834	0.75372	0.433246	MIC not significant	FALSE	FALSE	FALSE	FALSE	FALSE	FALSE	FALSE	FALSE
pcodonCTACCT	1343	0.10078	0.00102032	0.754	0.763	0.763056	0.778136	57	0.321894	0.0470237	0.14	0.276	0.131706	0.311797	0.105178	MIC not significant	FALSE	FALSE	FALSE	FALSE	FALSE	FALSE	FALSE	FALSE
pcodonCTACCG	1343	0.108106	0.000547781	0.26	0.249	0.26821	0.256013	40	0.342142	0.0196947	0.144	0.128	0.165157	0.133325	0.386397	MIC not significant	FALSE	FALSE	FALSE	FALSE	FALSE	FALSE	FALSE	FALSE
pcodonCTACGT	1343	0.10357	0.00223709	0.567	0.673	0.592522	0.689664	56	0.214061	0.00894333	0.908	0.855	0.874492	0.830981	0.48813	MIC not significant	FALSE	FALSE	FALSE	FALSE	FALSE	FALSE	FALSE	FALSE
pcodonCTACGA	1343	0.103811	0.000187777	0.55	0.511	0.596322	0.557432	45	0.180127	0.0097805	0.954	0.909	0.909809	0.870533	0.518062	MIC not significant	FALSE	FALSE	FALSE	FALSE	FALSE	FALSE	FALSE	FALSE
pcodonCTACGG	1343	0.1017	0.00304164	0.687	0.841	0.718226	0.83947	55	0.202467	0.0063797	0.946	0.907	0.916938	0.880721	0.562133	MIC not significant	FALSE	FALSE	FALSE	FALSE	FALSE	FALSE	FALSE	FALSE
pcodonCTAATT	1343	0.122586	0.00642078	0.046	0.123	0.0272554	0.133066	144	0.253158	0.0199294	0.127	0.231	0.125426	0.250337	0.0914577	MIC not significant	FALSE	FALSE	FALSE	FALSE	FALSE	FALSE	FALSE	FALSE
pcodonCTAATC	1343	0.107506	0.00406873	0.373	0.572	0.388904	0.595233	81	0.224091	0.0162816	0.659	0.697	0.68447	0.72543	0.256295	MIC not significant	FALSE	FALSE	FALSE	FALSE	FALSE	FALSE	FALSE	FALSE
pcodonCTAATA	1343	0.112714	0.0104599	0.129	0.633	0.135341	0.650566	79	0.267835	0.0030307	0.262	0.2	0.306332	0.222656	0.629893	MIC not significant	FALSE	FALSE	FALSE	FALSE	FALSE	FALSE	FALSE	FALSE
pcodonCTAATG	1343	0.116328	0.00815776	0.107	0.419	0.112984	0.44526	129	0.227442	0.00160419	0.641	0.551	0.67389	0.602176	0.652235	MIC not significant	FALSE	FALSE	FALSE	FALSE	FALSE	FALSE	FALSE	FALSE
pcodonCTAACT	1343	0.114593	0.00551745	0.075	0.217	0.0664371	0.230206	68	0.329815	0.00301945	0.132	0.091	0.126164	0.0811431	0.656275	MIC not significant	FALSE	FALSE	FALSE	FALSE	FALSE	FALSE	FALSE	FALSE
pcodonCTAACC	1343	0.118186	0.000142995	0.022	0.018	0.013955	0.0106067	52	0.282428	0.0135324	0.479	0.461	0.530064	0.492006	0.411498	MIC not significant	FALSE	FALSE	FALSE	FALSE	FALSE	FALSE	FALSE	FALSE
pcodonCTAACG	1343	0.0982876	4.13282e-09	0.9	0.871	0.884359	0.863462	71	0.247337	0.00352918	0.636	0.534	0.678952	0.585465	0.622633	MIC not significant	FALSE	FALSE	FALSE	FALSE	FALSE	FALSE	FALSE	FALSE
pcodonCTAAAG	1343	0.103119	5.60162e-05	0.633	0.57	0.647658	0.592407	41	0.177388	0.000444411	0.989	0.94	0.951926	0.908143	0.895914	MIC not significant	FALSE	FALSE	FALSE	FALSE	FALSE	FALSE	FALSE	FALSE
pcodonCTAAGG	1343	0.0956888	0.000640893	0.938	0.942	0.928576	0.928734	69	0.241024	0.000780213	0.748	0.625	0.760586	0.668907	0.819779	MIC not significant	FALSE	FALSE	FALSE	FALSE	FALSE	FALSE	FALSE	FALSE
pcodonCTAGTC	1343	0.107673	0.0032393	0.321	0.499	0.333951	0.498336	68	0.28889	0.0019574	0.366	0.257	0.399207	0.28736	0.72016	MIC not significant	FALSE	FALSE	FALSE	FALSE	FALSE	FALSE	FALSE	FALSE
pcodonCTAGTG	1343	0.127394	0.0170696	0.001	0.232	0.000690268	0.237742	98	0.225741	0.000227358	0.591	0.505	0.648131	0.549847	0.882847	MIC not significant	TRUE	FALSE	FALSE	FALSE	TRUE	FALSE	FALSE	FALSE
pcodonCTAGCT	1343	0.102703	0.00828752	0.648	0.983	0.670886	0.965332	50	0.294681	0.000173122	0.469	0.323	0.513533	0.370224	0.92774	MIC not significant	FALSE	FALSE	FALSE	FALSE	FALSE	FALSE	FALSE	FALSE
pcodonCTAGCG	1343	0.109387	0.00198219	0.251	0.306	0.268254	0.334203	72	0.329137	0.000163808	0.076	0.039	0.0611298	0.0318978	0.915023	MIC not significant	FALSE	FALSE	FALSE	FALSE	FALSE	FALSE	FALSE	FALSE
pcodonCTAGGT	1343	0.118076	0.0118142	0.062	0.509	0.0508811	0.513009	111	0.210722	0.0178584	0.855	0.921	0.841659	0.899389	0.162029	MIC not significant	FALSE	FALSE	FALSE	FALSE	FALSE	FALSE	FALSE	FALSE
pcodonCTAGGC	1343	0.106778	0.000449962	0.385	0.373	0.393963	0.376567	72	0.31288	0.000770117	0.13	0.08	0.134279	0.0789634	0.816652	MIC not significant	FALSE	FALSE	FALSE	FALSE	FALSE	FALSE	FALSE	FALSE
pcodonCTAGGA	1343	0.102203	0.00214518	0.747	0.803	0.748578	0.813064	97	0.255834	3.15274e-05	0.292	0.218	0.336641	0.242206	0.95647	MIC not significant	FALSE	FALSE	FALSE	FALSE	FALSE	FALSE	FALSE	FALSE
pcodonCTAGGG	1343	0.110546	0.00729947	0.263	0.641	0.269883	0.654865	96	0.239476	0.021469	0.518	0.656	0.548774	0.663578	0.154295	MIC not significant	FALSE	FALSE	FALSE	FALSE	FALSE	FALSE	FALSE	FALSE
pcodonCTGTTT	1343	0.112477	0.00883858	0.219	0.645	0.212387	0.655599	107	0.228259	0.0109501	0.699	0.733	0.724254	0.742592	0.283421	MIC not significant	FALSE	FALSE	FALSE	FALSE	FALSE	FALSE	FALSE	FALSE
pcodonCTGTTC	1343	0.106729	0.00198905	0.385	0.461	0.397782	0.479638	70	0.270471	0.0101355	0.451	0.429	0.503203	0.471668	0.406961	MIC not significant	FALSE	FALSE	FALSE	FALSE	FALSE	FALSE	FALSE	FALSE
pcodonCTGTTA	1343	0.115092	0.0019337	0.109	0.132	0.10017	0.137561	102	0.392774	0.0148722	0.00244737	0.00260526	0.000147947	0.000221329	0.222073	MIC not significant	FALSE	TRUE	FALSE	FALSE	FALSE	TRUE	FALSE	FALSE
pcodonCTGTTG	1343	0.115663	0.00528654	0.11	0.252	0.0950058	0.259245	103	0.226218	0.00608058	0.855	0.842	0.841962	0.815929	0.433671	MIC not significant	FALSE	FALSE	FALSE	FALSE	FALSE	FALSE	FALSE	FALSE
pcodonCTGTCT	1343	0.113977	0.00192958	0.066	0.094	0.061556	0.0903816	55	0.29777	0.0182439	0.293	0.289	0.334072	0.334363	0.325503	MIC not significant	FALSE	FALSE	FALSE	FALSE	FALSE	FALSE	FALSE	FALSE
pcodonCTGTCC	1343	0.0988129	0.000427422	0.894	0.881	0.879708	0.867319	44	0.209518	0.0157	0.835	0.811	0.829909	0.808621	0.416418	MIC not significant	FALSE	FALSE	FALSE	FALSE	FALSE	FALSE	FALSE	FALSE
pcodonCTGTCG	1343	0.102215	0.000182809	0.664	0.626	0.685219	0.649197	61	0.38321	0.0220754	0.01	0.01	0.00334502	0.00388942	0.253129	MIC not significant	FALSE	FALSE	FALSE	FALSE	FALSE	TRUE	FALSE	FALSE
pcodonCTGTAT	1343	0.105187	0.00724867	0.499	0.873	0.519301	0.86365	74	0.353447	8.13402e-05	0.032	0.016	0.0174315	0.00758901	0.939156	MIC not significant	FALSE	FALSE	FALSE	FALSE	FALSE	FALSE	FALSE	FALSE
pcodonCTGTGT	1343	0.122225	0.00816331	0.006	0.061	0.00176817	0.0478571	49	0.324186	0.0219826	0.307	0.34	0.350938	0.362793	0.308278	MIC not significant	TRUE	FALSE	FALSE	FALSE	TRUE	FALSE	FALSE	FALSE
pcodonCTGTGC	1343	0.105049	6.58834e-05	0.496	0.441	0.522534	0.479504	77	0.244587	0.0424087	0.543	0.835	0.58398	0.823344	0.0723647	MIC not significant	FALSE	FALSE	FALSE	FALSE	FALSE	FALSE	FALSE	FALSE
pcodonCTGTGA	1343	0.11161	0.00148833	0.15	0.178	0.138968	0.162687	63	0.220969	0.00797661	0.957	0.914	0.934889	0.900824	0.486373	MIC not significant	FALSE	FALSE	FALSE	FALSE	FALSE	FALSE	FALSE	FALSE
pcodonCTGTGG	1343	0.112941	3.29924e-05	0.228	0.204	0.249357	0.215537	127	0.256383	0.00300904	0.327	0.271	0.352657	0.290944	0.540187	MIC not significant	FALSE	FALSE	FALSE	FALSE	FALSE	FALSE	FALSE	FALSE
pcodonCTGCTT	1343	0.124989	0.00540234	0.01	0.046	0.00719529	0.0381399	119	0.252242	0.00429307	0.252	0.213	0.264831	0.215438	0.478962	MIC not significant	FALSE	FALSE	FALSE	FALSE	TRUE	FALSE	FALSE	FALSE
pcodonCTGCTC	1343	0.107333	0.00420947	0.334	0.585	0.362221	0.609649	44	0.277267	0.0843823	0.36	0.798	0.398783	0.792556	0.0561259	MIC not significant	FALSE	FALSE	FALSE	FALSE	FALSE	FALSE	FALSE	FALSE
pcodonCTGCTA	1343	0.11296	0.00333345	0.081	0.166	0.0754027	0.166908	40	0.312636	0.0854438	0.256	0.677	0.313944	0.694879	0.0675361	MIC not significant	FALSE	FALSE	FALSE	FALSE	FALSE	FALSE	FALSE	FALSE
pcodonCTGCTG	1343	0.113109	0.0035528	0.128	0.234	0.121311	0.231442	73	0.269348	0.00136057	0.372	0.275	0.418697	0.305434	0.756698	MIC not significant	FALSE	FALSE	FALSE	FALSE	FALSE	FALSE	FALSE	FALSE
pcodonCTGCCT	1343	0.118631	0.000514208	0.063	0.062	0.0583734	0.0541195	118	0.235843	0.00635674	0.444	0.417	0.476207	0.45003	0.390767	MIC not significant	FALSE	FALSE	FALSE	FALSE	FALSE	FALSE	FALSE	FALSE
pcodonCTGCCG	1343	0.112024	0.00235593	0.166	0.239	0.173134	0.24442	82	0.226878	6.55705e-05	0.899	0.827	0.881767	0.817692	0.942441	MIC not significant	FALSE	FALSE	FALSE	FALSE	FALSE	FALSE	FALSE	FALSE
pcodonCTGCAG	1343	0.096382	0.000451994	0.979	0.981	0.961115	0.957567	41	0.251397	0.0488764	0.618	0.81	0.667681	0.807317	0.16436	MIC not significant	FALSE	FALSE	FALSE	FALSE	FALSE	FALSE	FALSE	FALSE
pcodonCTGCGT	1343	0.103627	2.80143e-05	0.553	0.491	0.595467	0.540504	42	0.228518	0.00348043	0.753	0.618	0.773582	0.647834	0.71055	MIC not significant	FALSE	FALSE	FALSE	FALSE	FALSE	FALSE	FALSE	FALSE
pcodonCTGCGA	1343	0.105581	0.0082096	0.43	0.934	0.465839	0.91365	40	0.384356	0.0711778	0.057	0.142	0.040804	0.161629	0.0961737	MIC not significant	FALSE	FALSE	FALSE	FALSE	FALSE	FALSE	FALSE	FALSE
pcodonCTGCGG	1343	0.109287	0.00341399	0.222	0.371	0.229867	0.390855	50	0.363066	0.00205047	0.121	0.068	0.116914	0.0640402	0.75423	MIC not significant	FALSE	FALSE	FALSE	FALSE	FALSE	FALSE	FALSE	FALSE
pcodonCTGATT	1343	0.108129	0.00213146	0.579	0.665	0.600812	0.679918	168	0.23939	0.00576656	0.169	0.161	0.180357	0.177203	0.32791	MIC not significant	FALSE	FALSE	FALSE	FALSE	FALSE	FALSE	FALSE	FALSE
pcodonCTGATC	1343	0.11241	0.00254717	0.174	0.248	0.172959	0.246816	90	0.277875	0.0125621	0.271	0.281	0.283158	0.299299	0.292917	MIC not significant	FALSE	FALSE	FALSE	FALSE	FALSE	FALSE	FALSE	FALSE
pcodonCTGATA	1343	0.118331	0.006939	0.032	0.176	0.0303339	0.178915	86	0.368087	0.00410243	0.011	0.005	0.00443932	0.00219488	0.557261	Non-monotone	FALSE	FALSE	FALSE	FALSE	FALSE	TRUE	FALSE	FALSE
pcodonCTGATG	1343	0.107425	0.00172203	0.506	0.561	0.524035	0.581826	119	0.234516	4.65629e-06	0.417	0.325	0.459711	0.353613	0.981418	MIC not significant	FALSE	FALSE	FALSE	FALSE	FALSE	FALSE	FALSE	FALSE
pcodonCTGACT	1343	0.107368	0.00466143	0.372	0.61	0.378573	0.625099	72	0.249179	0.00579592	0.586	0.519	0.640693	0.567818	0.525031	MIC not significant	FALSE	FALSE	FALSE	FALSE	FALSE	FALSE	FALSE	FALSE
pcodonCTGACC	1343	0.110053	0.000353546	0.209	0.19	0.226114	0.204022	65	0.249754	0.0246605	0.77	0.844	0.777922	0.83847	0.211029	MIC not significant	FALSE	FALSE	FALSE	FALSE	FALSE	FALSE	FALSE	FALSE
pcodonCTGACG	1343	0.122111	0.00297082	0.017	0.03	0.0094712	0.0214104	94	0.22382	0.000830566	0.731	0.639	0.754238	0.672333	0.782752	MIC not significant	FALSE	FALSE	FALSE	FALSE	FALSE	FALSE	FALSE	FALSE
pcodonCTGAAT	1343	0.111491	0.0173035	0.112	0.989	0.117888	0.975171	47	0.394517	0.0534106	0.081	0.161	0.0692989	0.169647	0.11806	MIC not significant	FALSE	FALSE	FALSE	FALSE	FALSE	FALSE	FALSE	FALSE
pcodonCTGAAC	1343	0.109218	0.00664785	0.216	0.618	0.214445	0.620495	48	0.265337	0.00106764	0.755	0.613	0.766342	0.651465	0.825123	MIC not significant	FALSE	FALSE	FALSE	FALSE	FALSE	FALSE	FALSE	FALSE
pcodonCTGAAG	1343	0.110443	4.98404e-06	0.31	0.273	0.324847	0.283463	110	0.193836	0.00064218	0.957	0.922	0.942532	0.91135	0.792714	MIC not significant	FALSE	FALSE	FALSE	FALSE	FALSE	FALSE	FALSE	FALSE
pcodonCTGAGT	1343	0.110732	0.00141345	0.134	0.162	0.132531	0.159105	52	0.29184	0.0068158	0.429	0.338	0.46953	0.379471	0.559611	MIC not significant	FALSE	FALSE	FALSE	FALSE	FALSE	FALSE	FALSE	FALSE
pcodonCTGAGC	1343	0.118675	0.000251831	0.022	0.016	0.0165063	0.0126744	68	0.314693	0.0412177	0.187	0.38	0.200827	0.40611	0.0968219	MIC not significant	FALSE	FALSE	FALSE	FALSE	FALSE	FALSE	FALSE	FALSE
pcodonCTGAGA	1343	0.106253	0.00197084	0.417	0.491	0.427983	0.520231	44	0.250497	0.000987882	0.514	0.349	0.571963	0.407132	0.839177	MIC not significant	FALSE	FALSE	FALSE	FALSE	FALSE	FALSE	FALSE	FALSE
pcodonCTGAGG	1343	0.100478	0.000321733	0.829	0.817	0.831004	0.818843	103	0.26521	0.00273131	0.395	0.323	0.418357	0.339327	0.60008	MIC not significant	FALSE	FALSE	FALSE	FALSE	FALSE	FALSE	FALSE	FALSE
pcodonCTGGTC	1343	0.101532	0.000250909	0.716	0.689	0.724854	0.698672	58	0.284519	0.000620854	0.304	0.216	0.330556	0.217862	0.852712	MIC not significant	FALSE	FALSE	FALSE	FALSE	FALSE	FALSE	FALSE	FALSE
pcodonCTGGTG	1343	0.107934	0.00489742	0.353	0.612	0.376216	0.626163	82	0.31044	9.75691e-06	0.201	0.132	0.22569	0.146547	0.977808	MIC not significant	FALSE	FALSE	FALSE	FALSE	FALSE	FALSE	FALSE	FALSE
pcodonCTGGCT	1343	0.108596	0.00663821	0.308	0.667	0.320051	0.689264	71	0.43482	0.0335709	0.003	0.003	5.79215e-05	0.000221434	0.126154	MIC not significant	FALSE	TRUE	FALSE	FALSE	FALSE	TRUE	FALSE	FALSE
pcodonCTGGCC	1343	0.10101	2.66314e-07	0.711	0.666	0.735234	0.69561	56	0.238418	0.042586	0.7	0.879	0.724733	0.862472	0.127027	MIC not significant	FALSE	FALSE	FALSE	FALSE	FALSE	FALSE	FALSE	FALSE
pcodonCTGGCG	1343	0.116308	0.00201478	0.09	0.122	0.0897788	0.121325	112	0.261859	0.00284352	0.256	0.193	0.26743	0.205044	0.57657	MIC not significant	FALSE	FALSE	FALSE	FALSE	FALSE	FALSE	FALSE	FALSE
pcodonCTGGAA	1343	0.103353	0.0040869	0.621	0.839	0.633173	0.83647	42	0.330816	0.0754123	0.178	0.404	0.183278	0.458619	0.0786243	MIC not significant	FALSE	FALSE	FALSE	FALSE	FALSE	FALSE	FALSE	FALSE
pcodonCTGGGT	1343	0.103199	0.00674022	0.808	0.974	0.81802	0.965881	147	0.191157	0.000191662	0.851	0.77	0.839387	0.770374	0.867821	MIC not significant	FALSE	FALSE	FALSE	FALSE	FALSE	FALSE	FALSE	FALSE
pcodonCTGGGC	1343	0.114539	0.00113624	0.138	0.146	0.137959	0.150087	103	0.24486	0.00123982	0.618	0.54	0.666773	0.581316	0.724013	MIC not significant	FALSE	FALSE	FALSE	FALSE	FALSE	FALSE	FALSE	FALSE
pcodonCTGGGA	1343	0.109617	0.000551983	0.517	0.512	0.532118	0.522337	169	0.187076	0.000752631	0.855	0.798	0.853141	0.80341	0.723291	MIC not significant	FALSE	FALSE	FALSE	FALSE	FALSE	FALSE	FALSE	FALSE
pcodonCTGGGG	1343	0.12207	0.0221551	0.009	0.803	0.00747404	0.79831	92	0.254244	7.955e-06	0.455	0.36	0.490729	0.378867	0.978728	MIC not significant	FALSE	FALSE	FALSE	FALSE	TRUE	FALSE	FALSE	FALSE
pcodonCCTTTT	1343	0.111676	0.000224967	0.537	0.518	0.549241	0.518292	223	0.229282	0.0242369	0.083	0.3	0.0731424	0.314641	0.0200204	MIC not significant	FALSE	FALSE	FALSE	FALSE	FALSE	FALSE	FALSE	FALSE
pcodonCCTTTC	1343	0.135072	0.00152503	0.001	0.002	0.000180259	0.000272651	161	0.208928	0.0622005	0.654	0.999	0.681187	0.995815	0.00142053	MIC not significant	TRUE	FALSE	FALSE	FALSE	TRUE	FALSE	FALSE	FALSE
pcodonCCTTTA	1343	0.144962	0.0372537	2.63158e-05	0.740289	3.11047e-06	0.746068	256	0.200336	0.0716981	0.297079	0.999947	0.322031	0.999012	1.40655e-05	MIC not significant	TRUE	FALSE	FALSE	FALSE	TRUE	FALSE	FALSE	FALSE
pcodonCCTTTG	1343	0.107648	0.00390728	0.737	0.853	0.73667	0.861322	220	0.210611	0.00897668	0.299	0.372	0.338705	0.414865	0.16138	MIC not significant	FALSE	FALSE	FALSE	FALSE	FALSE	FALSE	FALSE	FALSE
pcodonCCTTCT	1343	0.105443	9.48506e-05	0.643	0.605	0.644006	0.610418	118	0.278688	0.0105579	0.075	0.08	0.0637373	0.0709486	0.268199	MIC not significant	FALSE	FALSE	FALSE	FALSE	FALSE	FALSE	FALSE	FALSE
pcodonCCTTCC	1343	0.116069	0.00605317	0.06	0.226	0.0577149	0.23227	85	0.268373	0.0540082	0.427	0.836	0.475939	0.841223	0.0323336	MIC not significant	FALSE	FALSE	FALSE	FALSE	FALSE	FALSE	FALSE	FALSE
pcodonCCTTCA	1343	0.105658	0.00270539	0.445	0.568	0.475256	0.607626	54	0.197253	0.00157152	0.971	0.917	0.937545	0.892087	0.775945	MIC not significant	FALSE	FALSE	FALSE	FALSE	FALSE	FALSE	FALSE	FALSE
pcodonCCTTCG	1343	0.125753	0.0207937	0.015	0.749	0.013117	0.754996	169	0.254789	0.0474816	0.053	0.482	0.0413696	0.510338	0.00442734	MIC not significant	FALSE	FALSE	FALSE	FALSE	FALSE	FALSE	FALSE	FALSE
pcodonCCTTAT	1343	0.130753	0.0234647	0.006	0.627	0.00277594	0.639143	184	0.337161	0.092036	0.000131579	0.0833289	2.53736e-07	0.0742499	2.83647e-05	non-significant monotone/non-monotone	TRUE	TRUE	FALSE	FALSE	TRUE	TRUE	FALSE	FALSE
pcodonCCTTAC	1343	0.116058	0.00345679	0.045	0.088	0.0333287	0.0816047	58	0.221206	0.0251172	0.789	0.846	0.800753	0.846637	0.234742	MIC not significant	FALSE	FALSE	FALSE	FALSE	FALSE	FALSE	FALSE	FALSE
pcodonCCTTAA	1343	0.110987	0.0020304	0.156	0.205	0.149019	0.204843	52	0.283493	0.0476941	0.487	0.717	0.537758	0.735874	0.119721	MIC not significant	FALSE	FALSE	FALSE	FALSE	FALSE	FALSE	FALSE	FALSE
pcodonCCTTAG	1343	0.11057	0.00111762	0.297	0.319	0.313835	0.334195	108	0.211075	0.00190761	0.89	0.831	0.877645	0.827156	0.653555	MIC not significant	FALSE	FALSE	FALSE	FALSE	FALSE	FALSE	FALSE	FALSE
pcodonCCTTGT	1343	0.114461	0.012487	0.087	0.67	0.0830129	0.678466	82	0.188415	0.0150265	0.996	0.997	0.985077	0.986288	0.271991	MIC not significant	FALSE	FALSE	FALSE	FALSE	FALSE	FALSE	FALSE	FALSE
pcodonCCTTGC	1343	0.108363	0.0168285	0.338	0.992	0.35996	0.985349	92	0.229255	0.00834049	0.708	0.683	0.729959	0.701754	0.386597	MIC not significant	FALSE	FALSE	FALSE	FALSE	FALSE	FALSE	FALSE	FALSE
pcodonCCTTGA	1343	0.116141	0.000736332	0.108	0.115	0.103813	0.103484	119	0.235208	0.00302265	0.402	0.341	0.436837	0.368453	0.552603	MIC not significant	FALSE	FALSE	FALSE	FALSE	FALSE	FALSE	FALSE	FALSE
pcodonCCTTGG	1343	0.111041	1.84213e-05	0.449	0.406	0.466478	0.425877	179	0.236884	0.00168326	0.214	0.184	0.237776	0.194754	0.58555	MIC not significant	FALSE	FALSE	FALSE	FALSE	FALSE	FALSE	FALSE	FALSE
pcodonCCTCTT	1343	0.0984868	8.86437e-07	0.967	0.96	0.954222	0.943129	159	0.220093	0.0171717	0.501	0.68	0.546298	0.704574	0.0996744	MIC not significant	FALSE	FALSE	FALSE	FALSE	FALSE	FALSE	FALSE	FALSE
pcodonCCTCTC	1343	0.107709	0.00239437	0.306	0.416	0.318277	0.436912	43	0.360148	0.159505	0.063	0.749	0.0495006	0.766457	0.00797425	MIC not significant	FALSE	FALSE	FALSE	FALSE	FALSE	FALSE	FALSE	FALSE
pcodonCCTCTA	1343	0.115582	0.00293286	0.055	0.09	0.0431224	0.0863311	68	0.354724	0.000330175	0.069	0.044	0.054643	0.0290335	0.883074	MIC not significant	FALSE	FALSE	FALSE	FALSE	FALSE	FALSE	FALSE	FALSE
pcodonCCTCTG	1343	0.105833	0.00393331	0.455	0.662	0.461	0.671259	63	0.279492	0.00361496	0.603	0.5	0.647777	0.548845	0.639719	MIC not significant	FALSE	FALSE	FALSE	FALSE	FALSE	FALSE	FALSE	FALSE
pcodonCCTCCT	1343	0.121422	0.000118338	0.058	0.049	0.0537949	0.0444064	161	0.198193	0.00491467	0.831	0.815	0.821307	0.810576	0.376866	MIC not significant	FALSE	FALSE	FALSE	FALSE	FALSE	FALSE	FALSE	FALSE
pcodonCCTCCG	1343	0.116611	0.000820151	0.06	0.062	0.0600466	0.0620754	96	0.23204	0.00396334	0.575	0.515	0.623243	0.561588	0.542289	MIC not significant	FALSE	FALSE	FALSE	FALSE	FALSE	FALSE	FALSE	FALSE
pcodonCCTCAG	1343	0.110534	0.00032308	0.158	0.143	0.165593	0.146376	49	0.28375	0.000630112	0.57	0.425	0.620588	0.475324	0.86382	MIC not significant	FALSE	FALSE	FALSE	FALSE	FALSE	FALSE	FALSE	FALSE
pcodonCCTCGT	1343	0.100892	0.000193533	0.757	0.725	0.765439	0.736832	70	0.335903	0.0193329	0.088	0.086	0.0698322	0.0781837	0.250361	MIC not significant	FALSE	FALSE	FALSE	FALSE	FALSE	FALSE	FALSE	FALSE
pcodonCCTCGG	1343	0.099139	0.00369769	0.851	0.956	0.852662	0.942897	55	0.187818	0.0160518	0.986	0.987	0.962858	0.960916	0.355647	MIC not significant	FALSE	FALSE	FALSE	FALSE	FALSE	FALSE	FALSE	FALSE
pcodonCCTATT	1343	0.128117	0.0278365	0.034	0.968	0.0303082	0.961333	306	0.196678	0.0476767	0.265	0.995	0.29163	0.978962	0.00011788	MIC not significant	FALSE	FALSE	FALSE	FALSE	FALSE	FALSE	FALSE	FALSE
pcodonCCTATC	1343	0.111399	0.0031272	0.249	0.374	0.259062	0.390125	109	0.253365	0.0596249	0.419	0.945	0.467896	0.920676	0.0105034	MIC not significant	FALSE	FALSE	FALSE	FALSE	FALSE	FALSE	FALSE	FALSE
pcodonCCTATA	1343	0.124827	0.00391881	0.02	0.058	0.015107	0.0418425	148	0.199732	0.000258949	0.934	0.882	0.91396	0.868594	0.846083	MIC not significant	FALSE	FALSE	FALSE	FALSE	FALSE	FALSE	FALSE	FALSE
pcodonCCTATG	1343	0.10755	0.000388339	0.714	0.69	0.706932	0.689849	207	0.193215	0.0234407	0.759	0.97	0.769906	0.945679	0.0276343	MIC not significant	FALSE	FALSE	FALSE	FALSE	FALSE	FALSE	FALSE	FALSE
pcodonCCTACT	1343	0.101665	0.000106215	0.797	0.764	0.797915	0.771021	103	0.243543	0.000142	0.662	0.57	0.680683	0.585124	0.904906	MIC not significant	FALSE	FALSE	FALSE	FALSE	FALSE	FALSE	FALSE	FALSE
pcodonCCTACC	1343	0.11065	0.00581256	0.181	0.442	0.173261	0.461029	60	0.271134	0.0199789	0.324	0.369	0.367116	0.403566	0.281366	MIC not significant	FALSE	FALSE	FALSE	FALSE	FALSE	FALSE	FALSE	FALSE
pcodonCCTACG	1343	0.144873	0.0449135	0	0.883614	7.62866e-08	0.879897	136	0.242098	0.0821225	0.336	0.994	0.372506	0.985208	0.000718726	MIC not significant	TRUE	FALSE	FALSE	FALSE	TRUE	FALSE	FALSE	FALSE
pcodonCCTAAT	1343	0.107644	0.00624525	0.295	0.685	0.312441	0.699554	54	0.266895	0.0820533	0.561	0.964	0.599865	0.931995	0.0360988	MIC not significant	FALSE	FALSE	FALSE	FALSE	FALSE	FALSE	FALSE	FALSE
pcodonCCTAAC	1343	0.106019	0.00106222	0.409	0.431	0.43352	0.458484	54	0.286497	0.0012058	0.394	0.282	0.446621	0.309357	0.802698	MIC not significant	FALSE	FALSE	FALSE	FALSE	FALSE	FALSE	FALSE	FALSE
pcodonCCTAAG	1343	0.137757	0.0285988	0.000328947	0.492013	3.945e-05	0.508002	166	0.245797	0.0571196	0.127	0.815	0.115332	0.810511	0.00192829	MIC not significant	TRUE	FALSE	FALSE	FALSE	TRUE	FALSE	FALSE	FALSE
pcodonCCTAGT	1343	0.10223	0.00318118	0.676	0.811	0.676155	0.808329	70	0.335315	0.00116761	0.087	0.059	0.0908256	0.050675	0.778397	MIC not significant	FALSE	FALSE	FALSE	FALSE	FALSE	FALSE	FALSE	FALSE
pcodonCCTAGC	1343	0.110806	0.00463751	0.178	0.361	0.178265	0.383647	63	0.320381	0.0393631	0.26	0.449	0.289358	0.468978	0.119051	MIC not significant	FALSE	FALSE	FALSE	FALSE	FALSE	FALSE	FALSE	FALSE
pcodonCCTAGA	1343	0.114395	0.00524943	0.062	0.208	0.0623269	0.21376	57	0.324903	0.0549049	0.116	0.288	0.113558	0.318471	0.0793647	MIC not significant	FALSE	FALSE	FALSE	FALSE	FALSE	FALSE	FALSE	FALSE
pcodonCCTAGG	1343	0.118027	0.00756401	0.107	0.363	0.0953401	0.37465	141	0.231769	0.0815137	0.351	0.998	0.409229	0.990564	0.000599736	MIC not significant	FALSE	FALSE	FALSE	FALSE	FALSE	FALSE	FALSE	FALSE
pcodonCCTGTC	1343	0.113946	0.0052541	0.131	0.308	0.135218	0.329973	95	0.24098	0.0133316	0.508	0.54	0.537659	0.573037	0.265184	MIC not significant	FALSE	FALSE	FALSE	FALSE	FALSE	FALSE	FALSE	FALSE
pcodonCCTGTG	1343	0.124036	0.000911997	0.007	0.007	0.00736114	0.00732096	116	0.235559	0.0210268	0.487	0.64	0.516753	0.666853	0.120406	MIC not significant	FALSE	FALSE	FALSE	FALSE	TRUE	FALSE	FALSE	FALSE
pcodonCCTGCT	1343	0.10242	0.000164907	0.704	0.676	0.71224	0.681041	86	0.258241	0.000408403	0.538	0.406	0.568329	0.446709	0.853475	MIC not significant	FALSE	FALSE	FALSE	FALSE	FALSE	FALSE	FALSE	FALSE
pcodonCCTGCC	1343	0.110417	0.00592249	0.246	0.55	0.267339	0.559247	91	0.267592	0.0250828	0.327	0.444	0.358539	0.487247	0.13377	MIC not significant	FALSE	FALSE	FALSE	FALSE	FALSE	FALSE	FALSE	FALSE
pcodonCCTGCA	1343	0.102485	0.000394242	0.681	0.655	0.69689	0.676081	42	0.192518	0.00241923	0.954	0.866	0.904828	0.845428	0.756424	MIC not significant	FALSE	FALSE	FALSE	FALSE	FALSE	FALSE	FALSE	FALSE
pcodonCCTGCG	1343	0.108179	0.000559158	0.607	0.584	0.627641	0.61294	165	0.22219	0.00280393	0.386	0.346	0.425028	0.379175	0.499367	MIC not significant	FALSE	FALSE	FALSE	FALSE	FALSE	FALSE	FALSE	FALSE
pcodonCCTGAA	1343	0.101439	0.00625034	0.739	0.942	0.74049	0.938247	74	0.263986	0.0145073	0.386	0.42	0.441536	0.454873	0.306684	MIC not significant	FALSE	FALSE	FALSE	FALSE	FALSE	FALSE	FALSE	FALSE
pcodonCCTGGT	1343	0.123652	0.00813897	0.04	0.22	0.034091	0.222711	185	0.218869	0.000627285	0.429	0.346	0.45163	0.375274	0.73506	MIC not significant	FALSE	FALSE	FALSE	FALSE	FALSE	FALSE	FALSE	FALSE
pcodonCCTGGC	1343	0.116746	0.00649854	0.107	0.311	0.106664	0.346283	131	0.236283	0.00605691	0.481	0.456	0.50526	0.491819	0.376931	MIC not significant	FALSE	FALSE	FALSE	FALSE	FALSE	FALSE	FALSE	FALSE
pcodonCCTGGA	1343	0.12006	0.0058447	0.105	0.277	0.0938611	0.274496	186	0.245849	0.0587791	0.101	0.83	0.0863138	0.813919	0.00085579	MIC not significant	FALSE	FALSE	FALSE	FALSE	FALSE	FALSE	FALSE	FALSE
pcodonCCTGGG	1343	0.107923	0.00135587	0.599	0.634	0.606309	0.640808	173	0.207782	0.00139078	0.796	0.74	0.795794	0.743878	0.626167	MIC not significant	FALSE	FALSE	FALSE	FALSE	FALSE	FALSE	FALSE	FALSE
pcodonCCCTTT	1343	0.11958	0.0164106	0.028	0.593	0.0192043	0.619291	77	0.291312	0.0097374	0.17	0.141	0.175241	0.152305	0.393204	MIC not significant	FALSE	FALSE	FALSE	FALSE	FALSE	FALSE	FALSE	FALSE
pcodonCCCTTC	1343	0.102432	0.00137473	0.665	0.703	0.664653	0.700308	66	0.217607	0.00620353	0.936	0.888	0.903403	0.86943	0.529597	MIC not significant	FALSE	FALSE	FALSE	FALSE	FALSE	FALSE	FALSE	FALSE
pcodonCCCTTA	1343	0.117609	0.00142795	0.029	0.041	0.0237237	0.0291685	71	0.233545	0.00544317	0.754	0.692	0.766983	0.707956	0.540893	MIC not significant	FALSE	FALSE	FALSE	FALSE	FALSE	FALSE	FALSE	FALSE
pcodonCCCTTG	1343	0.128113	0.0182049	0.000407895	0.168855	4.96892e-05	0.169889	59	0.266282	0.00332088	0.398	0.29	0.458738	0.340836	0.66385	MIC not significant	TRUE	FALSE	FALSE	FALSE	TRUE	FALSE	FALSE	FALSE
pcodonCCCTCT	1343	0.11685	0.00619048	0.029	0.133	0.0219984	0.136572	52	0.213568	6.64797e-05	0.955	0.857	0.92374	0.85372	0.954253	MIC not significant	FALSE	FALSE	FALSE	FALSE	FALSE	FALSE	FALSE	FALSE
pcodonCCCTCG	1343	0.110956	0.00629861	0.173	0.459	0.165913	0.492927	49	0.387686	0.000579955	0.079	0.041	0.0654619	0.0310813	0.869536	MIC not significant	FALSE	FALSE	FALSE	FALSE	FALSE	FALSE	FALSE	FALSE
pcodonCCCTGC	1343	0.107184	0.00367438	0.328	0.529	0.329913	0.542667	47	0.654449	0.126022	9.21053e-05	0.00138158	4.21082e-09	2.48104e-05	0.0147834	MIC not significant	FALSE	TRUE	FALSE	FALSE	FALSE	TRUE	FALSE	FALSE
pcodonCCCTGA	1343	0.10655	0.00722571	0.366	0.854	0.393241	0.847644	40	0.204016	0.000214158	0.929	0.809	0.891297	0.797746	0.928703	MIC not significant	FALSE	FALSE	FALSE	FALSE	FALSE	FALSE	FALSE	FALSE
pcodonCCCTGG	1343	0.110667	0.0082837	0.214	0.63	0.219328	0.649811	82	0.304642	0.000240875	0.225	0.16	0.258619	0.171708	0.889931	MIC not significant	FALSE	FALSE	FALSE	FALSE	FALSE	FALSE	FALSE	FALSE
pcodonCCCCTT	1343	0.112301	0.00864779	0.107	0.538	0.101557	0.563385	45	0.340851	0.0191744	0.073	0.07	0.0636596	0.0481634	0.363128	MIC not significant	FALSE	FALSE	FALSE	FALSE	FALSE	FALSE	FALSE	FALSE
pcodonCCCATT	1343	0.103463	0.00259411	0.613	0.726	0.634015	0.743655	63	0.509783	0.0145057	0.000776316	0.000486842	6.7994e-06	3.98484e-06	0.346197	MIC not significant	FALSE	TRUE	FALSE	FALSE	FALSE	TRUE	FALSE	FALSE
pcodonCCCATG	1343	0.106217	0.00838799	0.419	0.901	0.426909	0.888161	46	0.230777	0.00226101	0.629	0.471	0.659144	0.508444	0.753671	MIC not significant	FALSE	FALSE	FALSE	FALSE	FALSE	FALSE	FALSE	FALSE
pcodonCCCACG	1343	0.0994816	0.000456174	0.844	0.823	0.839185	0.82731	50	0.258128	0.0114787	0.732	0.676	0.744855	0.69348	0.458961	MIC not significant	FALSE	FALSE	FALSE	FALSE	FALSE	FALSE	FALSE	FALSE
pcodonCCCAAG	1343	0.111927	0.00109856	0.101	0.108	0.0999308	0.109009	46	0.228442	0.033391	0.622	0.747	0.670379	0.739956	0.223419	MIC not significant	FALSE	FALSE	FALSE	FALSE	FALSE	FALSE	FALSE	FALSE
pcodonCCCAGG	1343	0.10128	0.00382551	0.713	0.878	0.723588	0.868879	64	0.46144	0.00267235	0.004	0.002	0.000295467	9.23964e-05	0.684979	MIC not significant	FALSE	TRUE	FALSE	FALSE	FALSE	TRUE	FALSE	FALSE
pcodonCCCGCG	1343	0.100162	0.003171	0.791	0.894	0.788309	0.891407	60	0.275172	0.017156	0.318	0.325	0.362709	0.357153	0.317621	MIC not significant	FALSE	FALSE	FALSE	FALSE	FALSE	FALSE	FALSE	FALSE
pcodonCCCGGT	1343	0.107286	0.0176558	0.334	0.999	0.348157	0.993407	59	0.217491	0.0125529	0.818	0.794	0.823147	0.795939	0.397194	MIC not significant	FALSE	FALSE	FALSE	FALSE	FALSE	FALSE	FALSE	FALSE
pcodonCCCGGC	1343	0.108494	0.000815472	0.256	0.256	0.272092	0.277892	52	0.220163	0.00864409	0.925	0.877	0.894233	0.859448	0.510995	MIC not significant	FALSE	FALSE	FALSE	FALSE	FALSE	FALSE	FALSE	FALSE
pcodonCCCGGA	1343	0.102683	0.00194607	0.621	0.701	0.650386	0.726919	53	0.238848	0.000776185	0.787	0.654	0.794256	0.67051	0.843024	MIC not significant	FALSE	FALSE	FALSE	FALSE	FALSE	FALSE	FALSE	FALSE
pcodonCCCGGG	1343	0.112224	0.00699975	0.101	0.407	0.0896432	0.413094	50	0.442541	0.033985	0.014	0.023	0.00361767	0.007361	0.199983	MIC not significant	FALSE	FALSE	FALSE	FALSE	FALSE	TRUE	FALSE	FALSE
pcodonCCATGG	1343	0.11442	0.000864153	0.049	0.045	0.0343101	0.0348535	40	0.386364	0.0374235	0.068	0.075	0.0466071	0.0590124	0.231682	MIC not significant	FALSE	FALSE	FALSE	FALSE	FALSE	FALSE	FALSE	FALSE
pcodonCCACTT	1343	0.1234	0.0157111	0.004	0.25	0.000479498	0.263375	51	0.34677	0.0130234	0.155	0.123	0.165301	0.128353	0.425226	MIC not significant	TRUE	FALSE	FALSE	FALSE	TRUE	FALSE	FALSE	FALSE
pcodonCCAATT	1343	0.102957	0.00497492	0.674	0.868	0.693136	0.875487	93	0.24905	4.61932e-05	0.453	0.33	0.496593	0.378027	0.948446	MIC not significant	FALSE	FALSE	FALSE	FALSE	FALSE	FALSE	FALSE	FALSE
pcodonCCAATA	1343	0.102838	0.0043749	0.645	0.899	0.678162	0.876202	44	0.274778	0.0124923	0.359	0.277	0.394392	0.323489	0.468814	MIC not significant	FALSE	FALSE	FALSE	FALSE	FALSE	FALSE	FALSE	FALSE
pcodonCCAATG	1343	0.103126	0.00420585	0.614	0.833	0.630766	0.832124	48	0.396352	0.00403343	0.069	0.04	0.0531133	0.0249459	0.668039	MIC not significant	FALSE	FALSE	FALSE	FALSE	FALSE	FALSE	FALSE	FALSE
pcodonCCAAGG	1343	0.104667	0.000156505	0.511	0.461	0.541926	0.499744	43	0.316119	0.0289412	0.18	0.179	0.189355	0.199405	0.275422	MIC not significant	FALSE	FALSE	FALSE	FALSE	FALSE	FALSE	FALSE	FALSE
pcodonCCAGGT	1343	0.105316	0.00266278	0.47	0.611	0.490499	0.635663	44	0.251876	3.17845e-05	0.508	0.365	0.571492	0.404964	0.971265	MIC not significant	FALSE	FALSE	FALSE	FALSE	FALSE	FALSE	FALSE	FALSE
pcodonCCGTTT	1343	0.11379	0.00942818	0.14	0.575	0.133699	0.596947	98	0.2373	0.00110804	0.465	0.372	0.526334	0.425619	0.744887	MIC not significant	FALSE	FALSE	FALSE	FALSE	FALSE	FALSE	FALSE	FALSE
pcodonCCGTTC	1343	0.111249	0.0071294	0.156	0.524	0.16569	0.528918	70	0.299346	0.0204643	0.236	0.271	0.25948	0.312278	0.237441	MIC not significant	FALSE	FALSE	FALSE	FALSE	FALSE	FALSE	FALSE	FALSE
pcodonCCGTTA	1343	0.11532	0.000360246	0.118	0.1	0.109066	0.0967645	110	0.285197	0.0351977	0.11	0.307	0.113746	0.340837	0.0496853	MIC not significant	FALSE	FALSE	FALSE	FALSE	FALSE	FALSE	FALSE	FALSE
pcodonCCGTTG	1343	0.122172	0.0138622	0.021	0.377	0.0125118	0.3858	104	0.23266	0.0205596	0.761	0.877	0.770941	0.852198	0.146474	MIC not significant	FALSE	FALSE	FALSE	FALSE	FALSE	FALSE	FALSE	FALSE
pcodonCCGTCT	1343	0.0987488	0.00431984	0.847	0.961	0.846194	0.947757	59	0.253704	0.00818592	0.499	0.435	0.5436	0.478732	0.495561	MIC not significant	FALSE	FALSE	FALSE	FALSE	FALSE	FALSE	FALSE	FALSE
pcodonCCGTCC	1343	0.104763	0.000856719	0.49	0.494	0.529234	0.533509	44	0.218475	0.00237836	0.764	0.62	0.787077	0.65461	0.753242	MIC not significant	FALSE	FALSE	FALSE	FALSE	FALSE	FALSE	FALSE	FALSE
pcodonCCGTCG	1343	0.105765	0.00598763	0.567	0.832	0.575501	0.835428	107	0.285857	0.00294718	0.162	0.128	0.170952	0.126367	0.578639	MIC not significant	FALSE	FALSE	FALSE	FALSE	FALSE	FALSE	FALSE	FALSE
pcodonCCGTAT	1343	0.104345	0.00611087	0.516	0.873	0.542847	0.875428	46	0.196076	0.00591424	0.896	0.789	0.861911	0.791794	0.610408	MIC not significant	FALSE	FALSE	FALSE	FALSE	FALSE	FALSE	FALSE	FALSE
pcodonCCGTAG	1343	0.107165	0.00157251	0.307	0.36	0.333034	0.391219	45	0.216263	0.0372072	0.763	0.873	0.77515	0.857036	0.20426	MIC not significant	FALSE	FALSE	FALSE	FALSE	FALSE	FALSE	FALSE	FALSE
pcodonCCGTGT	1343	0.111221	0.00578136	0.15	0.388	0.137353	0.424795	45	0.230144	0.0501994	0.641	0.867	0.673317	0.84877	0.138986	MIC not significant	FALSE	FALSE	FALSE	FALSE	FALSE	FALSE	FALSE	FALSE
pcodonCCGTGC	1343	0.101886	0.000355903	0.727	0.709	0.723433	0.704634	70	0.215312	0.00102406	0.927	0.844	0.891462	0.826559	0.792561	MIC not significant	FALSE	FALSE	FALSE	FALSE	FALSE	FALSE	FALSE	FALSE
pcodonCCGTGA	1343	0.12005	0.00246968	0.01	0.014	0.00336434	0.00751022	51	0.261836	0.000313032	0.665	0.529	0.701292	0.577807	0.901926	MIC not significant	FALSE	FALSE	FALSE	FALSE	TRUE	FALSE	FALSE	FALSE
pcodonCCGTGG	1343	0.104211	0.00207071	0.676	0.751	0.688827	0.752947	116	0.282996	0.0104392	0.073	0.09	0.0751953	0.083066	0.275109	MIC not significant	FALSE	FALSE	FALSE	FALSE	FALSE	FALSE	FALSE	FALSE
pcodonCCGCTT	1343	0.120271	2.15609e-05	0.071	0.058	0.0764827	0.0620141	172	0.199688	0.0194284	0.667	0.853	0.681522	0.847863	0.068211	MIC not significant	FALSE	FALSE	FALSE	FALSE	FALSE	FALSE	FALSE	FALSE
pcodonCCGCTC	1343	0.1043	0.00034793	0.513	0.482	0.533299	0.505109	61	0.272346	0.00104069	0.309	0.2	0.344209	0.228157	0.805056	MIC not significant	FALSE	FALSE	FALSE	FALSE	FALSE	FALSE	FALSE	FALSE
pcodonCCGCTA	1343	0.114769	0.00436499	0.076	0.169	0.0672356	0.180567	69	0.289703	0.0577263	0.348	0.738	0.380875	0.748424	0.0469815	MIC not significant	FALSE	FALSE	FALSE	FALSE	FALSE	FALSE	FALSE	FALSE
pcodonCCGCTG	1343	0.108327	0.00120234	0.332	0.357	0.35318	0.381944	86	0.240202	0.00953162	0.727	0.717	0.747718	0.727768	0.371175	MIC not significant	FALSE	FALSE	FALSE	FALSE	FALSE	FALSE	FALSE	FALSE
pcodonCCGCCT	1343	0.0954577	0.000774197	0.974	0.969	0.956332	0.956733	106	0.305191	0.00453546	0.079	0.062	0.0699536	0.0513952	0.49276	MIC not significant	FALSE	FALSE	FALSE	FALSE	FALSE	FALSE	FALSE	FALSE
pcodonCCGCCG	1343	0.108196	0.00304964	0.357	0.489	0.375872	0.505794	82	0.255096	0.00752642	0.685	0.64	0.704231	0.664151	0.438339	MIC not significant	FALSE	FALSE	FALSE	FALSE	FALSE	FALSE	FALSE	FALSE
pcodonCCGCAG	1343	0.105946	0.000601141	0.442	0.425	0.455596	0.441384	51	0.334369	5.91716e-05	0.18	0.111	0.200587	0.113753	0.957369	MIC not significant	FALSE	FALSE	FALSE	FALSE	FALSE	FALSE	FALSE	FALSE
pcodonCCGCGT	1343	0.111955	0.000988324	0.102	0.12	0.106997	0.117916	53	0.250257	8.89996e-05	0.723	0.566	0.731111	0.606025	0.946585	MIC not significant	FALSE	FALSE	FALSE	FALSE	FALSE	FALSE	FALSE	FALSE
pcodonCCGATT	1343	0.128497	0.00552329	0.015	0.067	0.0110993	0.0542956	236	0.164481	0.00578155	0.987	0.989	0.974759	0.978299	0.244595	MIC not significant	FALSE	FALSE	FALSE	FALSE	FALSE	FALSE	FALSE	FALSE
pcodonCCGATC	1343	0.108423	0.00343916	0.307	0.468	0.32609	0.488736	71	0.270293	0.0419137	0.459	0.715	0.492013	0.735857	0.0868135	MIC not significant	FALSE	FALSE	FALSE	FALSE	FALSE	FALSE	FALSE	FALSE
pcodonCCGATA	1343	0.104226	0.000949746	0.551	0.553	0.578284	0.588566	73	0.31918	0.00200142	0.101	0.07	0.0933128	0.0529641	0.707046	MIC not significant	FALSE	FALSE	FALSE	FALSE	FALSE	FALSE	FALSE	FALSE
pcodonCCGATG	1343	0.106664	0.0044556	0.691	0.868	0.695332	0.851838	171	0.240057	0.000487208	0.118	0.094	0.12036	0.0800882	0.774452	MIC not significant	FALSE	FALSE	FALSE	FALSE	FALSE	FALSE	FALSE	FALSE
pcodonCCGACT	1343	0.111114	0.00214227	0.17	0.237	0.178908	0.245714	74	0.303189	0.012344	0.137	0.14	0.130345	0.130913	0.345987	MIC not significant	FALSE	FALSE	FALSE	FALSE	FALSE	FALSE	FALSE	FALSE
pcodonCCGACC	1343	0.112265	6.53667e-06	0.114	0.092	0.104606	0.0824999	62	0.283602	0.00234265	0.212	0.146	0.233072	0.15759	0.708723	MIC not significant	FALSE	FALSE	FALSE	FALSE	FALSE	FALSE	FALSE	FALSE
pcodonCCGACG	1343	0.111468	0.00102725	0.289	0.304	0.306396	0.321255	122	0.253155	0.00900878	0.189	0.197	0.204063	0.212564	0.298376	MIC not significant	FALSE	FALSE	FALSE	FALSE	FALSE	FALSE	FALSE	FALSE
pcodonCCGAAC	1343	0.101915	0.00117251	0.737	0.76	0.739874	0.769948	41	0.227954	0.0290899	0.805	0.847	0.805685	0.827028	0.285263	MIC not significant	FALSE	FALSE	FALSE	FALSE	FALSE	FALSE	FALSE	FALSE
pcodonCCGAAG	1343	0.105951	0.000194425	0.641	0.613	0.648508	0.618361	128	0.245811	0.00465475	0.415	0.389	0.471391	0.427603	0.444149	MIC not significant	FALSE	FALSE	FALSE	FALSE	FALSE	FALSE	FALSE	FALSE
pcodonCCGAGT	1343	0.113164	0.0013524	0.114	0.121	0.101945	0.117914	69	0.193699	0.00177166	0.989	0.966	0.962606	0.935506	0.731298	MIC not significant	FALSE	FALSE	FALSE	FALSE	FALSE	FALSE	FALSE	FALSE
pcodonCCGAGC	1343	0.0978583	0.00106941	0.89	0.902	0.88424	0.895414	75	0.31162	0.00934878	0.115	0.09	0.111613	0.0869864	0.409245	MIC not significant	FALSE	FALSE	FALSE	FALSE	FALSE	FALSE	FALSE	FALSE
pcodonCCGAGA	1343	0.106125	0.0089635	0.434	0.891	0.457777	0.880481	64	0.266141	0.00213441	0.681	0.567	0.712447	0.602394	0.716351	MIC not significant	FALSE	FALSE	FALSE	FALSE	FALSE	FALSE	FALSE	FALSE
pcodonCCGAGG	1343	0.113452	0.00886068	0.192	0.623	0.193963	0.647003	119	0.28892	0.000143909	0.04	0.024	0.0297291	0.0140216	0.896973	MIC not significant	FALSE	FALSE	FALSE	FALSE	FALSE	FALSE	FALSE	FALSE
pcodonCCGGTC	1343	0.0960314	0.00185091	0.923	0.952	0.922346	0.948211	68	0.225022	0.00631017	0.893	0.844	0.873447	0.832057	0.518742	MIC not significant	FALSE	FALSE	FALSE	FALSE	FALSE	FALSE	FALSE	FALSE
pcodonCCGGTG	1343	0.117914	0.000111855	0.021	0.019	0.0181933	0.0132437	71	0.202327	0.0141085	0.965	0.961	0.931312	0.935104	0.323073	MIC not significant	FALSE	FALSE	FALSE	FALSE	FALSE	FALSE	FALSE	FALSE
pcodonCCGGCT	1343	0.114763	0.0139013	0.1	0.749	0.0878633	0.759066	87	0.207408	0.00856876	0.95	0.941	0.921422	0.914243	0.393085	MIC not significant	FALSE	FALSE	FALSE	FALSE	FALSE	FALSE	FALSE	FALSE
pcodonCCGGCC	1343	0.117253	0.000756819	0.037	0.033	0.0334919	0.0314439	86	0.227629	0.0191607	0.83	0.887	0.830717	0.8708	0.203722	MIC not significant	FALSE	FALSE	FALSE	FALSE	FALSE	FALSE	FALSE	FALSE
pcodonCCGGCG	1343	0.108036	1.24965e-06	0.51	0.459	0.517138	0.474272	123	0.229356	2.21931e-06	0.42	0.321	0.449893	0.348114	0.986953	MIC not significant	FALSE	FALSE	FALSE	FALSE	FALSE	FALSE	FALSE	FALSE
pcodonCCGGAA	1343	0.103201	4.59494e-08	0.639	0.575	0.654964	0.601266	41	0.256015	0.00507763	0.569	0.457	0.627962	0.505201	0.657966	MIC not significant	FALSE	FALSE	FALSE	FALSE	FALSE	FALSE	FALSE	FALSE
pcodonCCGGGT	1343	0.107086	0.00633304	0.454	0.777	0.456072	0.786839	94	0.304199	0.00228405	0.066	0.04	0.0523658	0.0280027	0.647369	MIC not significant	FALSE	FALSE	FALSE	FALSE	FALSE	FALSE	FALSE	FALSE
pcodonCCGGGC	1343	0.111064	2.413e-06	0.169	0.149	0.192258	0.162599	70	0.313202	0.00041693	0.157	0.094	0.165506	0.103095	0.866758	MIC not significant	FALSE	FALSE	FALSE	FALSE	FALSE	FALSE	FALSE	FALSE
pcodonCCGGGA	1343	0.10149	0.000573225	0.828	0.818	0.825486	0.8194	118	0.263382	0.0108883	0.164	0.174	0.166597	0.179132	0.260798	MIC not significant	FALSE	FALSE	FALSE	FALSE	FALSE	FALSE	FALSE	FALSE
pcodonCCGGGG	1343	0.115328	0.00628848	0.063	0.21	0.0510887	0.225908	65	0.251034	0.00909092	0.774	0.736	0.780307	0.744837	0.44994	MIC not significant	FALSE	FALSE	FALSE	FALSE	FALSE	FALSE	FALSE	FALSE
pcodonCAGTTT	1343	0.102447	9.59174e-05	0.713	0.682	0.723978	0.689953	88	0.316871	0.0105421	0.082	0.077	0.0780985	0.0713404	0.341137	MIC not significant	FALSE	FALSE	FALSE	FALSE	FALSE	FALSE	FALSE	FALSE
pcodonCAGTTA	1343	0.0959968	0.000265947	0.943	0.937	0.93238	0.923574	61	0.243102	0.0073573	0.534	0.438	0.582134	0.493175	0.51003	MIC not significant	FALSE	FALSE	FALSE	FALSE	FALSE	FALSE	FALSE	FALSE
pcodonCAGTTG	1343	0.118865	0.000267916	0.009	0.009	0.00521834	0.00367584	45	0.198806	0.0236001	0.876	0.887	0.861224	0.873088	0.31258	MIC not significant	FALSE	FALSE	FALSE	FALSE	TRUE	FALSE	FALSE	FALSE
pcodonCAGTCG	1343	0.110969	3.14154e-07	0.141	0.112	0.128533	0.0976079	45	0.401954	0.0769949	0.012	0.045	0.00335607	0.0334179	0.0649745	MIC not significant	FALSE	FALSE	FALSE	FALSE	FALSE	TRUE	FALSE	FALSE
pcodonCAGTGC	1343	0.10463	0.00182251	0.519	0.588	0.539424	0.609425	57	0.326357	0.0639874	0.128	0.365	0.128664	0.405014	0.057633	MIC not significant	FALSE	FALSE	FALSE	FALSE	FALSE	FALSE	FALSE	FALSE
pcodonCAGTGA	1343	0.108108	0.000101174	0.263	0.222	0.282848	0.234148	40	0.2	0.000494337	0.962	0.859	0.90895	0.832747	0.891682	MIC not significant	FALSE	FALSE	FALSE	FALSE	FALSE	FALSE	FALSE	FALSE
pcodonCAGTGG	1343	0.114814	0.00692756	0.09	0.31	0.0903	0.337953	83	0.266264	0.0168593	0.515	0.578	0.555773	0.606691	0.241504	MIC not significant	FALSE	FALSE	FALSE	FALSE	FALSE	FALSE	FALSE	FALSE
pcodonCAGCTT	1343	0.106204	0.000752815	0.437	0.437	0.456382	0.457745	71	0.320352	0.00179399	0.101	0.061	0.0981612	0.053606	0.725801	MIC not significant	FALSE	FALSE	FALSE	FALSE	FALSE	FALSE	FALSE	FALSE
pcodonCAGCAG	1343	0.115487	0.00742275	0.055	0.254	0.0391495	0.258418	59	0.222948	0.00155875	0.769	0.643	0.776101	0.671235	0.766553	MIC not significant	FALSE	FALSE	FALSE	FALSE	FALSE	FALSE	FALSE	FALSE
pcodonCAGATT	1343	0.11487	0.00457786	0.163	0.314	0.15477	0.332337	128	0.237016	4.54417e-05	0.522	0.428	0.567549	0.464296	0.939802	MIC not significant	FALSE	FALSE	FALSE	FALSE	FALSE	FALSE	FALSE	FALSE
pcodonCAGATC	1343	0.102763	0.00266407	0.618	0.744	0.636192	0.750829	53	0.24157	0.00480874	0.772	0.674	0.778608	0.694751	0.621733	MIC not significant	FALSE	FALSE	FALSE	FALSE	FALSE	FALSE	FALSE	FALSE
pcodonCAGATG	1343	0.101885	0.000854252	0.788	0.803	0.78536	0.791277	107	0.296379	0.000246304	0.114	0.065	0.100531	0.058558	0.872531	MIC not significant	FALSE	FALSE	FALSE	FALSE	FALSE	FALSE	FALSE	FALSE
pcodonCAGACC	1343	0.110541	0.00692986	0.167	0.521	0.171027	0.539085	53	0.327034	0.0180801	0.183	0.173	0.181386	0.181353	0.337092	MIC not significant	FALSE	FALSE	FALSE	FALSE	FALSE	FALSE	FALSE	FALSE
pcodonCAGACG	1343	0.106582	0.000868628	0.376	0.382	0.401794	0.412068	65	0.278659	0.00618257	0.535	0.451	0.574195	0.496648	0.533551	MIC not significant	FALSE	FALSE	FALSE	FALSE	FALSE	FALSE	FALSE	FALSE
pcodonCAGAAG	1343	0.110792	0.00534871	0.32	0.57	0.334465	0.595833	114	0.238296	0.00511037	0.438	0.397	0.486609	0.437746	0.449753	MIC not significant	FALSE	FALSE	FALSE	FALSE	FALSE	FALSE	FALSE	FALSE
pcodonCAGAGC	1343	0.122488	0.0129225	0.006	0.143	0.000595829	0.148362	46	0.262716	0.00413747	0.362	0.256	0.428337	0.300545	0.670156	MIC not significant	TRUE	FALSE	FALSE	FALSE	TRUE	FALSE	FALSE	FALSE
pcodonCAGAGG	1343	0.113791	0.00530299	0.102	0.257	0.0854609	0.262129	75	0.244539	0.0174255	0.586	0.653	0.63489	0.668055	0.25831	MIC not significant	FALSE	FALSE	FALSE	FALSE	FALSE	FALSE	FALSE	FALSE
pcodonCAGGTC	1343	0.120928	0.0193043	0.004	0.661	0.0024097	0.680882	52	0.271756	0.00250748	0.575	0.458	0.617692	0.495065	0.724435	MIC not significant	TRUE	FALSE	FALSE	FALSE	TRUE	FALSE	FALSE	FALSE
pcodonCAGGTG	1343	0.119509	0.00174564	0.018	0.023	0.00955948	0.0139409	69	0.28576	0.00022004	0.349	0.25	0.391143	0.269841	0.903571	MIC not significant	FALSE	FALSE	FALSE	FALSE	FALSE	FALSE	FALSE	FALSE
pcodonCAGGCG	1343	0.118304	0.00762002	0.015	0.141	0.0124374	0.139363	55	0.283852	0.0192915	0.357	0.379	0.410879	0.418749	0.311864	MIC not significant	FALSE	FALSE	FALSE	FALSE	FALSE	FALSE	FALSE	FALSE
pcodonCAGGGT	1343	0.11026	7.50192e-08	0.209	0.178	0.224729	0.190274	76	0.265786	2.60217e-06	0.37	0.257	0.40119	0.271701	0.989032	MIC not significant	FALSE	FALSE	FALSE	FALSE	FALSE	FALSE	FALSE	FALSE
pcodonCAGGGA	1343	0.105004	0.00097109	0.511	0.521	0.526769	0.542332	73	0.267785	0.0264172	0.402	0.544	0.455593	0.573052	0.169481	MIC not significant	FALSE	FALSE	FALSE	FALSE	FALSE	FALSE	FALSE	FALSE
pcodonCGTTTT	1343	0.112229	0.00302634	0.341	0.461	0.36337	0.488477	158	0.225126	0.0211867	0.459	0.682	0.488312	0.698461	0.0680284	MIC not significant	FALSE	FALSE	FALSE	FALSE	FALSE	FALSE	FALSE	FALSE
pcodonCGTTTC	1343	0.106199	0.00665184	0.488	0.814	0.504776	0.821851	88	0.279327	0.00782856	0.281	0.258	0.323499	0.291636	0.412359	MIC not significant	FALSE	FALSE	FALSE	FALSE	FALSE	FALSE	FALSE	FALSE
pcodonCGTTTA	1343	0.119412	0.00137566	0.053	0.06	0.0440213	0.0515941	115	0.249413	0.015953	0.327	0.375	0.346193	0.425003	0.178603	MIC not significant	FALSE	FALSE	FALSE	FALSE	FALSE	FALSE	FALSE	FALSE
pcodonCGTTTG	1343	0.114668	0.0135713	0.209	0.859	0.220433	0.857713	146	0.217748	0.00718792	0.472	0.478	0.505736	0.510966	0.30894	MIC not significant	FALSE	FALSE	FALSE	FALSE	FALSE	FALSE	FALSE	FALSE
pcodonCGTTCT	1343	0.107092	0.000487171	0.361	0.346	0.382651	0.365612	62	0.278527	0.0234267	0.243	0.289	0.263887	0.320227	0.234966	MIC not significant	FALSE	FALSE	FALSE	FALSE	FALSE	FALSE	FALSE	FALSE
pcodonCGTTCC	1343	0.108341	0.000333625	0.25	0.229	0.263741	0.238829	46	0.228777	0.0748473	0.621	0.959	0.665427	0.92624	0.0658073	MIC not significant	FALSE	FALSE	FALSE	FALSE	FALSE	FALSE	FALSE	FALSE
pcodonCGTTCG	1343	0.0986896	1.52524e-06	0.875	0.843	0.865324	0.839707	76	0.255935	0.00986403	0.432	0.403	0.491954	0.45003	0.393329	MIC not significant	FALSE	FALSE	FALSE	FALSE	FALSE	FALSE	FALSE	FALSE
pcodonCGTTAT	1343	0.106328	0.000770777	0.555	0.562	0.576657	0.578992	110	0.260256	0.00707021	0.297	0.287	0.321054	0.305634	0.382467	MIC not significant	FALSE	FALSE	FALSE	FALSE	FALSE	FALSE	FALSE	FALSE
pcodonCGTTAA	1343	0.100024	0.00240766	0.813	0.905	0.822045	0.892187	45	0.231701	0.0273839	0.657	0.707	0.689806	0.724929	0.276336	MIC not significant	FALSE	FALSE	FALSE	FALSE	FALSE	FALSE	FALSE	FALSE
pcodonCGTTAG	1343	0.113274	0.00797903	0.094	0.404	0.0788041	0.440279	54	0.257754	0.0350411	0.635	0.76	0.67224	0.772045	0.17484	MIC not significant	FALSE	FALSE	FALSE	FALSE	FALSE	FALSE	FALSE	FALSE
pcodonCGTTGT	1343	0.116185	0.0118457	0.032	0.466	0.0232479	0.497292	51	0.248163	0.0115787	0.781	0.729	0.794782	0.737751	0.452302	MIC not significant	FALSE	FALSE	FALSE	FALSE	FALSE	FALSE	FALSE	FALSE
pcodonCGTTGC	1343	0.106451	0.00188651	0.39	0.462	0.412096	0.491921	48	0.234572	0.00308927	0.912	0.833	0.895412	0.826812	0.707499	MIC not significant	FALSE	FALSE	FALSE	FALSE	FALSE	FALSE	FALSE	FALSE
pcodonCGTTGA	1343	0.121409	0.00556943	0.013	0.054	0.00735452	0.0456512	77	0.254849	0.0156733	0.41	0.437	0.462085	0.482223	0.277979	MIC not significant	FALSE	FALSE	FALSE	FALSE	TRUE	FALSE	FALSE	FALSE
pcodonCGTTGG	1343	0.114227	0.00906557	0.109	0.472	0.0989442	0.499547	84	0.305613	0.0284307	0.195	0.309	0.214945	0.35086	0.125085	MIC not significant	FALSE	FALSE	FALSE	FALSE	FALSE	FALSE	FALSE	FALSE
pcodonCGTCTT	1343	0.10478	0.000362987	0.639	0.628	0.673477	0.655486	129	0.235705	0.0166182	0.535	0.667	0.566392	0.687795	0.145397	MIC not significant	FALSE	FALSE	FALSE	FALSE	FALSE	FALSE	FALSE	FALSE
pcodonCGTCTA	1343	0.113396	0.0106058	0.102	0.552	0.0961576	0.589724	76	0.237058	0.008057	0.651	0.584	0.675087	0.625678	0.439825	MIC not significant	FALSE	FALSE	FALSE	FALSE	FALSE	FALSE	FALSE	FALSE
pcodonCGTCTG	1343	0.113723	0.0032447	0.064	0.148	0.0622279	0.137289	45	0.296678	0.0475202	0.203	0.358	0.234178	0.40171	0.150279	MIC not significant	FALSE	FALSE	FALSE	FALSE	FALSE	FALSE	FALSE	FALSE
pcodonCGTCCT	1343	0.101799	0.000425871	0.763	0.746	0.764798	0.752444	95	0.241687	0.00231334	0.478	0.394	0.527199	0.432361	0.643468	MIC not significant	FALSE	FALSE	FALSE	FALSE	FALSE	FALSE	FALSE	FALSE
pcodonCGTCCG	1343	0.105208	0.00247206	0.49	0.608	0.510638	0.621325	68	0.261563	0.00778562	0.613	0.534	0.64778	0.58206	0.474287	MIC not significant	FALSE	FALSE	FALSE	FALSE	FALSE	FALSE	FALSE	FALSE
pcodonCGTCAG	1343	0.100947	0.000725113	0.771	0.782	0.775735	0.780899	46	0.250344	0.030398	0.41	0.485	0.502434	0.568194	0.246514	MIC not significant	FALSE	FALSE	FALSE	FALSE	FALSE	FALSE	FALSE	FALSE
pcodonCGTCGT	1343	0.111	0.00282471	0.17	0.257	0.176253	0.277214	68	0.221311	0.0103102	0.902	0.884	0.888423	0.875314	0.409983	MIC not significant	FALSE	FALSE	FALSE	FALSE	FALSE	FALSE	FALSE	FALSE
pcodonCGTCGA	1343	0.115925	0.00877419	0.055	0.298	0.0358824	0.32395	59	0.225179	0.0312685	0.726	0.838	0.739913	0.830047	0.180319	MIC not significant	FALSE	FALSE	FALSE	FALSE	FALSE	FALSE	FALSE	FALSE
pcodonCGTCGG	1343	0.111221	0.00683206	0.122	0.477	0.134488	0.504014	49	0.309954	5.7508e-06	0.369	0.255	0.420418	0.293434	0.986953	MIC not significant	FALSE	FALSE	FALSE	FALSE	FALSE	FALSE	FALSE	FALSE
pcodonCGTATT	1343	0.111793	0.001945	0.467	0.522	0.47661	0.5425	195	0.188155	9.27299e-09	0.789	0.696	0.789352	0.716629	0.998934	MIC not significant	FALSE	FALSE	FALSE	FALSE	FALSE	FALSE	FALSE	FALSE
pcodonCGTATC	1343	0.0994881	0.000282797	0.854	0.842	0.849244	0.834838	93	0.302725	0.00399567	0.098	0.081	0.0869627	0.060651	0.54721	MIC not significant	FALSE	FALSE	FALSE	FALSE	FALSE	FALSE	FALSE	FALSE
pcodonCGTATA	1343	0.104695	0.00254675	0.535	0.644	0.553959	0.665549	84	0.236709	0.00199719	0.808	0.713	0.801608	0.720072	0.686467	MIC not significant	FALSE	FALSE	FALSE	FALSE	FALSE	FALSE	FALSE	FALSE
pcodonCGTATG	1343	0.130113	0.00744744	0.001	0.028	0.00107099	0.0163136	139	0.262158	8.49825e-05	0.102	0.065	0.0903436	0.0534733	0.914229	MIC not significant	TRUE	FALSE	FALSE	FALSE	TRUE	FALSE	FALSE	FALSE
pcodonCGTACT	1343	0.107686	0.000750341	0.341	0.344	0.349355	0.347185	69	0.298239	0.0182604	0.295	0.31	0.328287	0.350611	0.268267	MIC not significant	FALSE	FALSE	FALSE	FALSE	FALSE	FALSE	FALSE	FALSE
pcodonCGTACC	1343	0.100662	4.99593e-05	0.792	0.744	0.789775	0.752158	49	0.218598	0.0281603	0.955	0.961	0.922615	0.946251	0.249098	MIC not significant	FALSE	FALSE	FALSE	FALSE	FALSE	FALSE	FALSE	FALSE
pcodonCGTACG	1343	0.108265	3.43697e-05	0.31	0.269	0.314983	0.272099	75	0.293131	0.0120442	0.175	0.164	0.175765	0.166875	0.348603	MIC not significant	FALSE	FALSE	FALSE	FALSE	FALSE	FALSE	FALSE	FALSE
pcodonCGTAAG	1343	0.110688	0.00165319	0.317	0.364	0.334705	0.383394	121	0.244373	0.0342999	0.274	0.616	0.296187	0.635311	0.0419811	MIC not significant	FALSE	FALSE	FALSE	FALSE	FALSE	FALSE	FALSE	FALSE
pcodonCGTAGT	1343	0.105625	0.00281424	0.429	0.579	0.470931	0.623211	48	0.323368	0.0020394	0.34	0.232	0.382911	0.265105	0.760531	MIC not significant	FALSE	FALSE	FALSE	FALSE	FALSE	FALSE	FALSE	FALSE
pcodonCGTAGA	1343	0.113207	0.000439079	0.068	0.062	0.0632519	0.054866	42	0.240244	0.000548397	0.673	0.504	0.699966	0.553678	0.882847	MIC not significant	FALSE	FALSE	FALSE	FALSE	FALSE	FALSE	FALSE	FALSE
pcodonCGTAGG	1343	0.104695	0.000717505	0.526	0.519	0.545224	0.542354	70	0.307617	0.000871223	0.212	0.143	0.22153	0.142644	0.808347	MIC not significant	FALSE	FALSE	FALSE	FALSE	FALSE	FALSE	FALSE	FALSE
pcodonCGTGTC	1343	0.108054	0.000337953	0.304	0.28	0.317233	0.287762	68	0.432961	0.0121745	0.003	0.001	0.000357082	0.000253774	0.370391	MIC not significant	FALSE	TRUE	FALSE	FALSE	FALSE	TRUE	FALSE	FALSE
pcodonCGTGTG	1343	0.10177	0.0016886	0.711	0.755	0.720775	0.768686	74	0.34073	0.0427236	0.042	0.106	0.0271478	0.10361	0.0772387	MIC not significant	FALSE	FALSE	FALSE	FALSE	FALSE	FALSE	FALSE	FALSE
pcodonCGTGCT	1343	0.112887	0.00789121	0.11	0.44	0.109308	0.467093	70	0.199436	0.0063906	0.977	0.956	0.943748	0.926312	0.510636	MIC not significant	FALSE	FALSE	FALSE	FALSE	FALSE	FALSE	FALSE	FALSE
pcodonCGTGCC	1343	0.0998549	0.000359898	0.814	0.799	0.816633	0.801644	62	0.232031	0.00800695	0.569	0.499	0.615849	0.535097	0.48917	MIC not significant	FALSE	FALSE	FALSE	FALSE	FALSE	FALSE	FALSE	FALSE
pcodonCGTGCA	1343	0.113308	0.00684403	0.07	0.34	0.0671381	0.35236	43	0.271701	0.00611901	0.42	0.323	0.475472	0.367462	0.616977	MIC not significant	FALSE	FALSE	FALSE	FALSE	FALSE	FALSE	FALSE	FALSE
pcodonCGTGCG	1343	0.0896508	1.73404e-05	0.997	0.995	0.993389	0.991336	94	0.329024	0.0452297	0.03	0.102	0.0128171	0.097608	0.0395943	MIC not significant	FALSE	FALSE	FALSE	FALSE	FALSE	FALSE	FALSE	FALSE
pcodonCGTGAA	1343	0.115099	0.00128482	0.053	0.056	0.0461266	0.0532866	57	0.301295	0.0516586	0.214	0.446	0.257151	0.509813	0.089078	MIC not significant	FALSE	FALSE	FALSE	FALSE	FALSE	FALSE	FALSE	FALSE
pcodonCGTGGT	1343	0.119621	0.00104028	0.051	0.055	0.0432197	0.0463688	115	0.267004	0.0255428	0.168	0.303	0.181487	0.350198	0.0879798	MIC not significant	FALSE	FALSE	FALSE	FALSE	FALSE	FALSE	FALSE	FALSE
pcodonCGTGGC	1343	0.106156	0.00748631	0.455	0.841	0.475481	0.840129	75	0.283383	0.000945857	0.213	0.143	0.2411	0.160875	0.793373	MIC not significant	FALSE	FALSE	FALSE	FALSE	FALSE	FALSE	FALSE	FALSE
pcodonCGTGGA	1343	0.113385	0.000582542	0.186	0.178	0.197309	0.188405	125	0.246649	0.0162705	0.454	0.576	0.493776	0.608911	0.156311	MIC not significant	FALSE	FALSE	FALSE	FALSE	FALSE	FALSE	FALSE	FALSE
pcodonCGTGGG	1343	0.110523	0.003415	0.228	0.37	0.245742	0.397171	90	0.236404	0.017085	0.686	0.768	0.708293	0.765356	0.219461	MIC not significant	FALSE	FALSE	FALSE	FALSE	FALSE	FALSE	FALSE	FALSE
pcodonCGCTTT	1343	0.10908	0.00808198	0.21	0.707	0.210749	0.720987	46	0.282514	0.00778835	0.268	0.206	0.296499	0.211804	0.558592	MIC not significant	FALSE	FALSE	FALSE	FALSE	FALSE	FALSE	FALSE	FALSE
pcodonCGCTTC	1343	0.100025	0.00154022	0.83	0.873	0.835118	0.872725	41	0.342351	0.065815	0.128	0.29	0.131628	0.328257	0.105423	MIC not significant	FALSE	FALSE	FALSE	FALSE	FALSE	FALSE	FALSE	FALSE
pcodonCGCTTA	1343	0.10656	0.00382432	0.347	0.599	0.39054	0.62361	40	0.243172	0.00535496	0.727	0.584	0.745771	0.636108	0.653618	MIC not significant	FALSE	FALSE	FALSE	FALSE	FALSE	FALSE	FALSE	FALSE
pcodonCGCTTG	1343	0.111753	0.0100101	0.108	0.677	0.09756	0.695369	44	0.402089	0.0369051	0.022	0.028	0.00667748	0.00978419	0.210849	MIC not significant	FALSE	FALSE	FALSE	FALSE	FALSE	FALSE	FALSE	FALSE
pcodonCGCATT	1343	0.110542	0.00441509	0.169	0.339	0.161917	0.373413	51	0.266155	0.0676942	0.663	0.953	0.69866	0.928648	0.0654302	MIC not significant	FALSE	FALSE	FALSE	FALSE	FALSE	FALSE	FALSE	FALSE
pcodonCGCATG	1343	0.113982	0.0107376	0.075	0.557	0.0698185	0.578078	60	0.252818	0.0162946	0.484	0.469	0.539417	0.527816	0.331072	MIC not significant	FALSE	FALSE	FALSE	FALSE	FALSE	FALSE	FALSE	FALSE
pcodonCGCGGC	1343	0.106285	0.0023038	0.393	0.494	0.422141	0.535458	40	0.214645	4.25923e-06	0.883	0.76	0.868385	0.766171	0.990328	MIC not significant	FALSE	FALSE	FALSE	FALSE	FALSE	FALSE	FALSE	FALSE
pcodonCGCGGG	1343	0.107392	0.00561076	0.302	0.66	0.330953	0.688721	40	0.331847	0.081648	0.189	0.514	0.220505	0.55577	0.0741574	MIC not significant	FALSE	FALSE	FALSE	FALSE	FALSE	FALSE	FALSE	FALSE
pcodonCGATTT	1343	0.131499	0.024988	0.003	0.577	0.000414055	0.596008	137	0.261761	0.00537447	0.132	0.118	0.128522	0.113384	0.394567	MIC not significant	TRUE	FALSE	FALSE	FALSE	TRUE	FALSE	FALSE	FALSE
pcodonCGATTC	1343	0.109121	0.00744653	0.315	0.702	0.327032	0.71466	90	0.199039	0.0023996	0.973	0.933	0.946473	0.913057	0.646595	MIC not significant	FALSE	FALSE	FALSE	FALSE	FALSE	FALSE	FALSE	FALSE
pcodonCGATTA	1343	0.104896	0.00597009	0.579	0.845	0.601863	0.849376	99	0.282169	0.00530643	0.109	0.097	0.102953	0.0798195	0.473653	MIC not significant	FALSE	FALSE	FALSE	FALSE	FALSE	FALSE	FALSE	FALSE
pcodonCGATTG	1343	0.117975	0.0127074	0.043	0.533	0.0414908	0.535085	98	0.238066	3.06962e-05	0.493	0.374	0.530858	0.41122	0.95682	MIC not significant	FALSE	FALSE	FALSE	FALSE	FALSE	FALSE	FALSE	FALSE
pcodonCGATAT	1343	0.106861	0.0110279	0.39	0.938	0.407643	0.919012	72	0.269544	0.00809867	0.398	0.353	0.454468	0.398207	0.452186	MIC not significant	FALSE	FALSE	FALSE	FALSE	FALSE	FALSE	FALSE	FALSE
pcodonCGATGC	1343	0.100545	0.000218843	0.773	0.749	0.788698	0.765055	54	0.184762	0.00761948	0.988	0.957	0.959096	0.937885	0.530242	MIC not significant	FALSE	FALSE	FALSE	FALSE	FALSE	FALSE	FALSE	FALSE
pcodonCGATGG	1343	0.109993	0.00618769	0.236	0.519	0.245771	0.556813	78	0.294095	0.00202781	0.118	0.08	0.124665	0.0718234	0.695441	MIC not significant	FALSE	FALSE	FALSE	FALSE	FALSE	FALSE	FALSE	FALSE
pcodonCGACTT	1343	0.107446	0.0039628	0.382	0.584	0.393067	0.588886	89	0.320938	0.00648582	0.073	0.056	0.0573057	0.0384965	0.45311	MIC not significant	FALSE	FALSE	FALSE	FALSE	FALSE	FALSE	FALSE	FALSE
pcodonCGACTG	1343	0.108364	0.00234812	0.252	0.348	0.268382	0.371204	46	0.261536	0.0110571	0.397	0.305	0.436833	0.357759	0.486751	MIC not significant	FALSE	FALSE	FALSE	FALSE	FALSE	FALSE	FALSE	FALSE
pcodonCGACCT	1343	0.10705	0.00508862	0.352	0.654	0.372017	0.680344	47	0.526729	0.0228426	0.001	0.001	6.85036e-05	4.89266e-05	0.310542	MIC not significant	FALSE	TRUE	FALSE	FALSE	FALSE	TRUE	FALSE	FALSE
pcodonCGACGT	1343	0.101888	0.00269548	0.684	0.812	0.715071	0.818125	59	0.220828	0.0042088	0.799	0.681	0.792536	0.710948	0.62543	MIC not significant	FALSE	FALSE	FALSE	FALSE	FALSE	FALSE	FALSE	FALSE
pcodonCGAATT	1343	0.113515	0.00943385	0.286	0.756	0.296	0.756894	168	0.214972	0.0228581	0.46	0.744	0.501272	0.757643	0.050434	MIC not significant	FALSE	FALSE	FALSE	FALSE	FALSE	FALSE	FALSE	FALSE
pcodonCGAATC	1343	0.110133	0.00418307	0.245	0.411	0.254668	0.441721	81	0.26098	0.0410195	0.295	0.561	0.320606	0.602154	0.0697846	MIC not significant	FALSE	FALSE	FALSE	FALSE	FALSE	FALSE	FALSE	FALSE
pcodonCGAATA	1343	0.101612	0.00995688	0.736	0.989	0.748044	0.984111	79	0.262389	5.51822e-06	0.32	0.219	0.362435	0.248281	0.983608	MIC not significant	FALSE	FALSE	FALSE	FALSE	FALSE	FALSE	FALSE	FALSE
pcodonCGAATG	1343	0.135342	0.0204132	0.001	0.105	1.69516e-05	0.114097	120	0.268292	0.00509023	0.118	0.109	0.111391	0.093536	0.438717	MIC not significant	TRUE	FALSE	FALSE	FALSE	TRUE	FALSE	FALSE	FALSE
pcodonCGAACT	1343	0.110217	0.0114813	0.165	0.842	0.173611	0.84059	49	0.309365	0.0126575	0.392	0.337	0.446396	0.386615	0.441503	MIC not significant	FALSE	FALSE	FALSE	FALSE	FALSE	FALSE	FALSE	FALSE
pcodonCGAACC	1343	0.0980719	0.00143776	0.905	0.933	0.900082	0.92265	50	0.257354	5.9975e-06	0.747	0.603	0.755685	0.627428	0.986747	MIC not significant	FALSE	FALSE	FALSE	FALSE	FALSE	FALSE	FALSE	FALSE
pcodonCGAACA	1343	0.113391	0.00274726	0.078	0.132	0.0721616	0.13654	41	0.208073	0.0365281	0.897	0.947	0.867363	0.918657	0.231302	MIC not significant	FALSE	FALSE	FALSE	FALSE	FALSE	FALSE	FALSE	FALSE
pcodonCGAACG	1343	0.0988178	3.33717e-05	0.837	0.811	0.839348	0.813409	73	0.283591	0.00480199	0.282	0.215	0.321311	0.244577	0.560196	MIC not significant	FALSE	FALSE	FALSE	FALSE	FALSE	FALSE	FALSE	FALSE
pcodonCGAAAG	1343	0.103194	9.07701e-05	0.661	0.623	0.65778	0.626041	85	0.281968	0.00414539	0.319	0.266	0.354142	0.289273	0.558268	MIC not significant	FALSE	FALSE	FALSE	FALSE	FALSE	FALSE	FALSE	FALSE
pcodonCGAAGC	1343	0.112536	5.08543e-07	0.086	0.056	0.0751542	0.0510959	40	0.25	0.0391935	0.656	0.779	0.689294	0.777485	0.220743	MIC not significant	FALSE	FALSE	FALSE	FALSE	FALSE	FALSE	FALSE	FALSE
pcodonCGAAGG	1343	0.103466	0.00047908	0.575	0.561	0.608534	0.596299	56	0.231352	0.0399754	0.789	0.901	0.781168	0.883068	0.139563	MIC not significant	FALSE	FALSE	FALSE	FALSE	FALSE	FALSE	FALSE	FALSE
pcodonCGAGTC	1343	0.103807	0.00156528	0.571	0.644	0.608812	0.671762	41	0.248589	0.00963833	0.662	0.554	0.672503	0.579691	0.541422	MIC not significant	FALSE	FALSE	FALSE	FALSE	FALSE	FALSE	FALSE	FALSE
pcodonCGAGTG	1343	0.106323	0.00610713	0.37	0.763	0.39618	0.763164	50	0.265605	0.0409681	0.684	0.848	0.72248	0.837136	0.158639	MIC not significant	FALSE	FALSE	FALSE	FALSE	FALSE	FALSE	FALSE	FALSE
pcodonCGAGCT	1343	0.114335	0.00980075	0.041	0.452	0.0318839	0.468766	41	0.300265	0.0480328	0.305	0.474	0.35686	0.518628	0.168119	MIC not significant	FALSE	FALSE	FALSE	FALSE	FALSE	FALSE	FALSE	FALSE
pcodonCGAGGT	1343	0.11452	0.00354987	0.082	0.155	0.077016	0.160255	74	0.281211	0.0119063	0.276	0.259	0.312442	0.292562	0.354738	MIC not significant	FALSE	FALSE	FALSE	FALSE	FALSE	FALSE	FALSE	FALSE
pcodonCGAGGC	1343	0.107482	0.0010619	0.328	0.345	0.329242	0.343564	55	0.282767	0.0234183	0.377	0.421	0.42416	0.466387	0.263862	MIC not significant	FALSE	FALSE	FALSE	FALSE	FALSE	FALSE	FALSE	FALSE
pcodonCGAGGA	1343	0.109318	0.00637999	0.318	0.647	0.305905	0.652458	81	0.230685	0.0187458	0.553	0.624	0.5932	0.66191	0.222908	MIC not significant	FALSE	FALSE	FALSE	FALSE	FALSE	FALSE	FALSE	FALSE
pcodonCGAGGG	1343	0.109806	0.003253	0.194	0.315	0.181348	0.326718	49	0.283536	0.00403505	0.561	0.458	0.616293	0.499453	0.664569	MIC not significant	FALSE	FALSE	FALSE	FALSE	FALSE	FALSE	FALSE	FALSE
pcodonCGGTTT	1343	0.119521	0.0152218	0.007	0.471	0.00535513	0.494513	58	0.346137	0.0481734	0.07	0.134	0.0529015	0.145491	0.0978414	MIC not significant	FALSE	FALSE	FALSE	FALSE	TRUE	FALSE	FALSE	FALSE
pcodonCGGTTC	1343	0.0985952	0.00116084	0.859	0.882	0.861125	0.881596	51	0.248047	0.00480544	0.801	0.689	0.793455	0.702812	0.627894	MIC not significant	FALSE	FALSE	FALSE	FALSE	FALSE	FALSE	FALSE	FALSE
pcodonCGGTTA	1343	0.106621	0.00340581	0.357	0.544	0.394609	0.590516	42	0.310145	0.0918006	0.238	0.67	0.255072	0.698485	0.0511243	MIC not significant	FALSE	FALSE	FALSE	FALSE	FALSE	FALSE	FALSE	FALSE
pcodonCGGTTG	1343	0.104443	0.00242054	0.55	0.672	0.561884	0.683541	43	0.241194	0.0220358	0.645	0.65	0.680375	0.670545	0.340901	MIC not significant	FALSE	FALSE	FALSE	FALSE	FALSE	FALSE	FALSE	FALSE
pcodonCGGTCG	1343	0.117994	0.00947238	0.015	0.221	0.00863329	0.222681	41	0.202192	0.0187113	0.909	0.897	0.887135	0.873317	0.393764	MIC not significant	FALSE	FALSE	FALSE	FALSE	FALSE	FALSE	FALSE	FALSE
pcodonCGGTGC	1343	0.116055	0.00454747	0.036	0.109	0.027608	0.100257	56	0.27067	0.182913	0.462947	0.999908	0.512985	0.999567	0.00111734	MIC not significant	FALSE	FALSE	FALSE	FALSE	FALSE	FALSE	FALSE	FALSE
pcodonCGGTGG	1343	0.111837	0.00474193	0.176	0.357	0.170457	0.36629	73	0.239106	0.0188968	0.712	0.76	0.719909	0.753504	0.246151	MIC not significant	FALSE	FALSE	FALSE	FALSE	FALSE	FALSE	FALSE	FALSE
pcodonCGGCTT	1343	0.112602	0.00854959	0.189	0.594	0.192874	0.618118	100	0.280547	0.0179772	0.106	0.142	0.0939983	0.137832	0.183536	MIC not significant	FALSE	FALSE	FALSE	FALSE	FALSE	FALSE	FALSE	FALSE
pcodonCGGCTA	1343	0.118223	0.00510439	0.013	0.049	0.00510662	0.0416417	41	0.286174	9.51814e-05	0.387	0.238	0.441065	0.266812	0.951933	MIC not significant	FALSE	FALSE	FALSE	FALSE	TRUE	FALSE	FALSE	FALSE
pcodonCGGCTG	1343	0.102961	0.00309252	0.631	0.79	0.651914	0.797848	46	0.302989	0.0313734	0.193	0.212	0.191558	0.235525	0.238956	MIC not significant	FALSE	FALSE	FALSE	FALSE	FALSE	FALSE	FALSE	FALSE
pcodonCGGCCT	1343	0.11177	0.00394308	0.17	0.31	0.16411	0.311184	79	0.268325	0.000741992	0.274	0.184	0.308815	0.206043	0.811308	MIC not significant	FALSE	FALSE	FALSE	FALSE	FALSE	FALSE	FALSE	FALSE
pcodonCGGCCG	1343	0.114502	0.00520268	0.063	0.196	0.0556483	0.197876	51	0.328129	0.108437	0.217	0.841	0.236793	0.831927	0.0182952	MIC not significant	FALSE	FALSE	FALSE	FALSE	FALSE	FALSE	FALSE	FALSE
pcodonCGGATT	1343	0.119946	0.0119721	0.041	0.471	0.0468557	0.47587	126	0.291383	0.00241092	0.105	0.078	0.093698	0.0659906	0.585069	MIC not significant	FALSE	FALSE	FALSE	FALSE	FALSE	FALSE	FALSE	FALSE
pcodonCGGATC	1343	0.0997462	0.000213024	0.826	0.801	0.818665	0.797105	71	0.238433	0.0108003	0.735	0.709	0.740388	0.722928	0.388425	MIC not significant	FALSE	FALSE	FALSE	FALSE	FALSE	FALSE	FALSE	FALSE
pcodonCGGATA	1343	0.109719	0.00243579	0.186	0.263	0.200157	0.291814	43	0.233889	1.84717e-06	0.685	0.532	0.727535	0.580386	0.993453	MIC not significant	FALSE	FALSE	FALSE	FALSE	FALSE	FALSE	FALSE	FALSE
pcodonCGGATG	1343	0.108178	0.0127215	0.519	0.973	0.542062	0.968011	137	0.223187	0.00244092	0.532	0.475	0.582652	0.520626	0.566421	MIC not significant	FALSE	FALSE	FALSE	FALSE	FALSE	FALSE	FALSE	FALSE
pcodonCGGACT	1343	0.103049	0.00752978	0.614	0.952	0.643335	0.935655	58	0.231818	0.00689838	0.726	0.644	0.741393	0.670371	0.535362	MIC not significant	FALSE	FALSE	FALSE	FALSE	FALSE	FALSE	FALSE	FALSE
pcodonCGGACC	1343	0.12575	0.000350248	0.001	0.001	0.000102936	7.23256e-05	52	0.268179	0.000274338	0.574	0.429	0.629043	0.48492	0.907222	MIC not significant	TRUE	FALSE	FALSE	FALSE	TRUE	FALSE	FALSE	FALSE
pcodonCGGACG	1343	0.108437	0.000292082	0.342	0.317	0.348096	0.322074	90	0.258162	0.0101466	0.486	0.45	0.511107	0.493559	0.344834	MIC not significant	FALSE	FALSE	FALSE	FALSE	FALSE	FALSE	FALSE	FALSE
pcodonCGGAAT	1343	0.112745	0.00753098	0.08	0.396	0.0750196	0.418391	44	0.238081	1.98653e-08	0.631	0.456	0.664451	0.503498	0.999636	MIC not significant	FALSE	FALSE	FALSE	FALSE	FALSE	FALSE	FALSE	FALSE
pcodonCGGAAG	1343	0.111389	0.000693399	0.224	0.225	0.235824	0.2338	96	0.287375	0.0032483	0.112	0.08	0.099305	0.0673815	0.581252	MIC not significant	FALSE	FALSE	FALSE	FALSE	FALSE	FALSE	FALSE	FALSE
pcodonCGGAGC	1343	0.113985	0.000315744	0.071	0.064	0.0629511	0.0518021	55	0.30538	0.0138313	0.251	0.22	0.279219	0.250184	0.392477	MIC not significant	FALSE	FALSE	FALSE	FALSE	FALSE	FALSE	FALSE	FALSE
pcodonCGGAGA	1343	0.106118	0.00203008	0.374	0.46	0.40631	0.496419	49	0.273201	0.00508773	0.658	0.566	0.697029	0.59072	0.626237	MIC not significant	FALSE	FALSE	FALSE	FALSE	FALSE	FALSE	FALSE	FALSE
pcodonCGGAGG	1343	0.100961	0.000974025	0.781	0.789	0.779159	0.791968	81	0.381575	0.109712	0.002	0.12	0.000139542	0.122818	0.00252386	MIC not significant	FALSE	TRUE	FALSE	FALSE	FALSE	TRUE	FALSE	FALSE
pcodonCGGGTC	1343	0.108203	0.0015019	0.338	0.357	0.348142	0.390188	82	0.255979	0.0229097	0.664	0.771	0.69251	0.775763	0.17465	MIC not significant	FALSE	FALSE	FALSE	FALSE	FALSE	FALSE	FALSE	FALSE
pcodonCGGGTG	1343	0.115418	0.00796113	0.062	0.326	0.0556151	0.328588	79	0.272675	0.000639099	0.235	0.154	0.245614	0.16039	0.824975	MIC not significant	FALSE	FALSE	FALSE	FALSE	FALSE	FALSE	FALSE	FALSE
pcodonCGGGCT	1343	0.123061	0.0085732	0.012	0.069	0.00322145	0.0680345	79	0.283791	0.000435725	0.169	0.11	0.193983	0.115286	0.855116	MIC not significant	FALSE	FALSE	FALSE	FALSE	TRUE	FALSE	FALSE	FALSE
pcodonCGGGCC	1343	0.116945	0.00448555	0.058	0.152	0.0558845	0.149839	88	0.260089	0.0054493	0.464	0.405	0.501962	0.445727	0.494279	MIC not significant	FALSE	FALSE	FALSE	FALSE	FALSE	FALSE	FALSE	FALSE
pcodonCGGGCA	1343	0.104177	0.00525146	0.535	0.847	0.570033	0.853757	42	0.249481	0.00647437	0.602	0.483	0.633646	0.516568	0.611358	MIC not significant	FALSE	FALSE	FALSE	FALSE	FALSE	FALSE	FALSE	FALSE
pcodonCGGGCG	1343	0.120906	0.0110779	0.023	0.297	0.0194472	0.301236	105	0.250668	0.00426234	0.53	0.465	0.566567	0.495277	0.508172	MIC not significant	FALSE	FALSE	FALSE	FALSE	FALSE	FALSE	FALSE	FALSE
pcodonCGGGGT	1343	0.122384	0.0179137	0.027	0.693	0.0208721	0.705015	132	0.202264	0.00758479	0.89	0.891	0.880829	0.881602	0.320726	MIC not significant	FALSE	FALSE	FALSE	FALSE	FALSE	FALSE	FALSE	FALSE
pcodonCGGGGC	1343	0.111426	0.00550334	0.281	0.568	0.3048	0.576577	121	0.249523	0.000988001	0.225	0.172	0.246674	0.172576	0.732161	MIC not significant	FALSE	FALSE	FALSE	FALSE	FALSE	FALSE	FALSE	FALSE
pcodonCGGGGA	1343	0.107961	0.000978652	0.563	0.564	0.569833	0.583017	143	0.245072	0.0120341	0.196	0.23	0.20279	0.25267	0.192149	MIC not significant	FALSE	FALSE	FALSE	FALSE	FALSE	FALSE	FALSE	FALSE
pcodonCGGGGG	1343	0.110229	0.0094222	0.208	0.733	0.233152	0.735129	76	0.272972	0.00200094	0.295	0.218	0.332319	0.234904	0.701206	MIC not significant	FALSE	FALSE	FALSE	FALSE	FALSE	FALSE	FALSE	FALSE
pcodonATTTTT	1343	0.123199	0.00211371	0.193	0.259	0.196774	0.250112	502	0.155936	6.25576e-05	0.571	0.508	0.596976	0.535874	0.859687	MIC not significant	FALSE	FALSE	FALSE	FALSE	FALSE	FALSE	FALSE	FALSE
pcodonATTTTC	1343	0.122306	0.000262209	0.164	0.154	0.171231	0.154739	365	0.219626	0.0105985	0.008	0.022	0.00328491	0.0144041	0.0493777	MIC not significant	FALSE	FALSE	FALSE	FALSE	FALSE	TRUE	FALSE	FALSE
pcodonATTTTA	1343	0.13944	0.0153688	0.003	0.153	0.000911946	0.140838	510	0.175816	0.0349107	0.143	0.959	0.152595	0.951387	2.1701e-05	MIC not significant	TRUE	FALSE	FALSE	FALSE	TRUE	FALSE	FALSE	FALSE
pcodonATTTTG	1343	0.141529	0.0233925	0.000815789	0.346211	0.000213483	0.359095	458	0.163529	0.000206152	0.519	0.46	0.540397	0.483514	0.759262	MIC not significant	TRUE	FALSE	FALSE	FALSE	TRUE	FALSE	FALSE	FALSE
pcodonATTTCT	1343	0.117987	0.000876158	0.165	0.174	0.160251	0.165494	209	0.206845	0.000618583	0.547	0.468	0.56957	0.494974	0.720748	MIC not significant	FALSE	FALSE	FALSE	FALSE	FALSE	FALSE	FALSE	FALSE
pcodonATTTCC	1343	0.117446	0.0151507	0.179	0.858	0.177911	0.85333	173	0.201577	0.00332363	0.855	0.823	0.835083	0.81407	0.451204	MIC not significant	FALSE	FALSE	FALSE	FALSE	FALSE	FALSE	FALSE	FALSE
pcodonATTTCA	1343	0.121212	0.011931	0.044	0.383	0.0380725	0.414686	130	0.205607	0.00340078	0.887	0.863	0.877399	0.853023	0.509866	MIC not significant	FALSE	FALSE	FALSE	FALSE	FALSE	FALSE	FALSE	FALSE
pcodonATTTCG	1343	0.113859	0.00145535	0.523	0.568	0.544181	0.584693	312	0.189471	0.0206514	0.373	0.777	0.399485	0.786961	0.011042	MIC not significant	FALSE	FALSE	FALSE	FALSE	FALSE	FALSE	FALSE	FALSE
pcodonATTTAT	1343	0.117184	0.00229491	0.381	0.46	0.398115	0.486677	387	0.18312	0.0137071	0.233	0.487	0.234554	0.521224	0.0212415	MIC not significant	FALSE	FALSE	FALSE	FALSE	FALSE	FALSE	FALSE	FALSE
pcodonATTTAC	1343	0.11769	0.0142674	0.12	0.756	0.118099	0.769677	151	0.194172	0.00075756	0.929	0.891	0.915635	0.881021	0.73727	MIC not significant	FALSE	FALSE	FALSE	FALSE	FALSE	FALSE	FALSE	FALSE
pcodonATTTAA	1343	0.121647	0.0132121	0.037	0.456	0.0279277	0.471907	137	0.208861	0.00589523	0.784	0.771	0.784863	0.767137	0.372514	MIC not significant	FALSE	FALSE	FALSE	FALSE	FALSE	FALSE	FALSE	FALSE
pcodonATTTAG	1343	0.124061	0.00654212	0.057	0.194	0.050092	0.201321	219	0.216347	0.00147533	0.27	0.233	0.282787	0.23417	0.57182	MIC not significant	FALSE	FALSE	FALSE	FALSE	FALSE	FALSE	FALSE	FALSE
pcodonATTTGT	1343	0.141247	0.0266524	0.000263158	0.311211	2.01531e-05	0.323831	222	0.221708	2.77171e-05	0.157	0.114	0.16232	0.113354	0.937828	MIC not significant	TRUE	FALSE	FALSE	FALSE	TRUE	FALSE	FALSE	FALSE
pcodonATTTGC	1343	0.124221	0.0141057	0.06	0.642	0.0544522	0.638938	267	0.282086	0.0557789	0.000276316	0.0509474	3.38437e-06	0.0397439	9.76754e-05	MIC not significant	FALSE	TRUE	FALSE	FALSE	FALSE	TRUE	FALSE	FALSE
pcodonATTTGA	1343	0.110149	0.0013067	0.675	0.713	0.690661	0.721597	277	0.202854	0.0028921	0.266	0.262	0.277283	0.266357	0.372582	MIC not significant	FALSE	FALSE	FALSE	FALSE	FALSE	FALSE	FALSE	FALSE
pcodonATTTGG	1343	0.116329	3.12613e-05	0.478	0.436	0.482908	0.442545	424	0.19052	0.0132856	0.059	0.18	0.0518881	0.198738	0.0175808	MIC not significant	FALSE	FALSE	FALSE	FALSE	FALSE	FALSE	FALSE	FALSE
pcodonATTCTT	1343	0.118798	0.000766843	0.289	0.291	0.290966	0.291986	369	0.194634	0.0240166	0.12	0.6	0.118872	0.619943	0.00283687	MIC not significant	FALSE	FALSE	FALSE	FALSE	FALSE	FALSE	FALSE	FALSE
pcodonATTCTC	1343	0.106644	0.00155769	0.477	0.534	0.494887	0.547746	94	0.241005	0.00170961	0.518	0.428	0.564738	0.466679	0.692338	MIC not significant	FALSE	FALSE	FALSE	FALSE	FALSE	FALSE	FALSE	FALSE
pcodonATTCTA	1343	0.124067	0.0113922	0.037	0.315	0.0270568	0.355181	179	0.208962	0.0128488	0.685	0.784	0.697907	0.791189	0.130838	MIC not significant	FALSE	FALSE	FALSE	FALSE	FALSE	FALSE	FALSE	FALSE
pcodonATTCTG	1343	0.110027	0.000163977	0.437	0.403	0.468835	0.437853	156	0.321341	0.000212953	0.002	0.001	0.000113787	5.49249e-05	0.856517	MIC not significant	FALSE	TRUE	FALSE	FALSE	FALSE	TRUE	FALSE	FALSE
pcodonATTCCT	1343	0.116782	0.00891864	0.202	0.595	0.199031	0.620767	184	0.183455	0.0108227	0.932	0.951	0.90781	0.933382	0.159914	MIC not significant	FALSE	FALSE	FALSE	FALSE	FALSE	FALSE	FALSE	FALSE
pcodonATTCCC	1343	0.106304	0.00380738	0.382	0.598	0.411785	0.623728	48	0.311701	0.00332262	0.407	0.297	0.464473	0.333895	0.696355	MIC not significant	FALSE	FALSE	FALSE	FALSE	FALSE	FALSE	FALSE	FALSE
pcodonATTCCA	1343	0.113888	0.0164979	0.069	0.904	0.0504943	0.890188	47	0.283465	0.00644003	0.661	0.565	0.689758	0.602882	0.59073	MIC not significant	FALSE	FALSE	FALSE	FALSE	FALSE	FALSE	FALSE	FALSE
pcodonATTCCG	1343	0.116682	0.000480832	0.2	0.187	0.189758	0.180676	171	0.229058	0.000602503	0.213	0.154	0.223414	0.159306	0.749974	MIC not significant	FALSE	FALSE	FALSE	FALSE	FALSE	FALSE	FALSE	FALSE
pcodonATTCAG	1343	0.110555	0.00356626	0.321	0.462	0.325368	0.478902	116	0.242861	0.000178765	0.377	0.293	0.414676	0.315154	0.886725	MIC not significant	FALSE	FALSE	FALSE	FALSE	FALSE	FALSE	FALSE	FALSE
pcodonATTCGT	1343	0.110516	0.00163409	0.541	0.603	0.549266	0.598811	203	0.211011	0.000399287	0.534	0.462	0.571986	0.488635	0.777198	MIC not significant	FALSE	FALSE	FALSE	FALSE	FALSE	FALSE	FALSE	FALSE
pcodonATTCGC	1343	0.112199	0.00355294	0.096	0.219	0.0985137	0.218254	46	0.306309	0.0110564	0.151	0.106	0.168616	0.116333	0.485528	MIC not significant	FALSE	FALSE	FALSE	FALSE	FALSE	FALSE	FALSE	FALSE
pcodonATTCGA	1343	0.113095	0.00147894	0.292	0.324	0.292308	0.329427	151	0.286363	2.57378e-05	0.044	0.03	0.0317037	0.0182243	0.950703	MIC not significant	FALSE	FALSE	FALSE	FALSE	FALSE	FALSE	FALSE	FALSE
pcodonATTCGG	1343	0.127527	0.00780328	0.006	0.041	0.00208749	0.0333585	131	0.225751	0.0268226	0.668	0.873	0.687766	0.865384	0.061598	MIC not significant	TRUE	FALSE	FALSE	FALSE	TRUE	FALSE	FALSE	FALSE
pcodonATTATT	1343	0.119926	0.00613591	0.361	0.643	0.374655	0.665921	666	0.159279	0.025277	0.109	0.87	0.108944	0.86653	3.76386e-05	MIC not significant	FALSE	FALSE	FALSE	FALSE	FALSE	FALSE	FALSE	FALSE
pcodonATTATC	1343	0.116424	0.000269246	0.422	0.406	0.434642	0.407504	347	0.181567	0.0337648	0.402	0.979	0.435135	0.961041	0.000581922	MIC not significant	FALSE	FALSE	FALSE	FALSE	FALSE	FALSE	FALSE	FALSE
pcodonATTATA	1343	0.121812	0.0115485	0.175	0.678	0.169139	0.678948	331	0.195666	0.00155475	0.244	0.223	0.273538	0.245786	0.474649	MIC not significant	FALSE	FALSE	FALSE	FALSE	FALSE	FALSE	FALSE	FALSE
pcodonATTATG	1343	0.124879	0.00039529	0.127	0.115	0.129809	0.120274	529	0.172477	4.17278e-05	0.138	0.112	0.141107	0.110285	0.882167	MIC not significant	FALSE	FALSE	FALSE	FALSE	FALSE	FALSE	FALSE	FALSE
pcodonATTACT	1343	0.114004	0.000272569	0.353	0.324	0.37434	0.349408	209	0.21687	3.29213e-05	0.367	0.287	0.400961	0.31577	0.934287	MIC not significant	FALSE	FALSE	FALSE	FALSE	FALSE	FALSE	FALSE	FALSE
pcodonATTACC	1343	0.121633	0.0231436	0.118	0.978	0.106637	0.971293	227	0.192436	0.0268439	0.554	0.919	0.578533	0.906756	0.0134506	MIC not significant	FALSE	FALSE	FALSE	FALSE	FALSE	FALSE	FALSE	FALSE
pcodonATTACA	1343	0.113713	0.00142118	0.126	0.148	0.13239	0.153774	89	0.252095	9.13782e-05	0.539	0.433	0.574568	0.471884	0.929155	MIC not significant	FALSE	FALSE	FALSE	FALSE	FALSE	FALSE	FALSE	FALSE
pcodonATTACG	1343	0.133352	0.0293051	0.005	0.923	0.0056656	0.923955	354	0.225984	0.095284	0.008	0.998	0.00155873	0.99516	2.9789e-09	Monotone	TRUE	FALSE	FALSE	FALSE	TRUE	TRUE	FALSE	TRUE
pcodonATTAAT	1343	0.123071	0.0123629	0.02	0.328	0.0169562	0.322014	126	0.261353	0.00474334	0.292	0.253	0.321035	0.290129	0.443503	MIC not significant	FALSE	FALSE	FALSE	FALSE	FALSE	FALSE	FALSE	FALSE
pcodonATTAAC	1343	0.116729	0.00235854	0.102	0.144	0.0930691	0.137214	123	0.201641	0.00818317	0.81	0.807	0.802395	0.806854	0.319708	MIC not significant	FALSE	FALSE	FALSE	FALSE	FALSE	FALSE	FALSE	FALSE
pcodonATTAAA	1343	0.114949	0.00433236	0.062	0.164	0.0631044	0.169576	72	0.278475	0.0126308	0.374	0.359	0.411689	0.383017	0.34646	MIC not significant	FALSE	FALSE	FALSE	FALSE	FALSE	FALSE	FALSE	FALSE
pcodonATTAAG	1343	0.126217	0.0298429	0.07	0.997	0.0715611	0.994428	370	0.208033	0.0644683	0.032	0.995	0.0266764	0.985716	7.46771e-07	MIC not significant	FALSE	FALSE	FALSE	FALSE	FALSE	FALSE	FALSE	FALSE
pcodonATTAGT	1343	0.118853	0.0217663	0.09	0.965	0.0922834	0.9635	164	0.303916	1.82213e-05	0.00352632	0.00198684	0.000501045	0.000196735	0.956738	MIC not significant	FALSE	TRUE	FALSE	FALSE	FALSE	TRUE	FALSE	FALSE
pcodonATTAGC	1343	0.115494	0.009067	0.202	0.67	0.216975	0.66989	181	0.224704	0.00774326	0.395	0.434	0.413924	0.448243	0.238818	MIC not significant	FALSE	FALSE	FALSE	FALSE	FALSE	FALSE	FALSE	FALSE
pcodonATTAGA	1343	0.120782	0.000624824	0.078	0.072	0.0710236	0.0679464	181	0.226997	0.00211605	0.35	0.286	0.382988	0.325466	0.538613	MIC not significant	FALSE	FALSE	FALSE	FALSE	FALSE	FALSE	FALSE	FALSE
pcodonATTAGG	1343	0.117855	0.0215197	0.324	0.997	0.352224	0.994765	355	0.218457	0.0376896	0.005	0.295	0.00313066	0.307039	0.000233221	MIC not significant	FALSE	FALSE	FALSE	FALSE	FALSE	TRUE	FALSE	FALSE
pcodonATTGTC	1343	0.120802	0.0039373	0.108	0.208	0.107205	0.214131	221	0.245744	0.0590738	0.024	0.632	0.0156306	0.668649	0.00026473	MIC not significant	FALSE	FALSE	FALSE	FALSE	FALSE	FALSE	FALSE	FALSE
pcodonATTGTG	1343	0.120987	0.00608622	0.11	0.307	0.103958	0.321575	244	0.202477	0.00325572	0.397	0.382	0.416214	0.399057	0.374845	MIC not significant	FALSE	FALSE	FALSE	FALSE	FALSE	FALSE	FALSE	FALSE
pcodonATTGCT	1343	0.112377	0.0125597	0.381	0.928	0.386509	0.919783	167	0.206585	0.000139474	0.624	0.541	0.65158	0.568296	0.8796	MIC not significant	FALSE	FALSE	FALSE	FALSE	FALSE	FALSE	FALSE	FALSE
pcodonATTGCC	1343	0.116062	0.00308433	0.182	0.274	0.199085	0.304122	171	0.239183	0.0339682	0.121	0.483	0.132681	0.504069	0.0158163	MIC not significant	FALSE	FALSE	FALSE	FALSE	FALSE	FALSE	FALSE	FALSE
pcodonATTGCA	1343	0.101153	0.00486214	0.771	0.933	0.780185	0.921645	90	0.208283	0.00102112	0.918	0.843	0.891108	0.834329	0.764948	MIC not significant	FALSE	FALSE	FALSE	FALSE	FALSE	FALSE	FALSE	FALSE
pcodonATTGCG	1343	0.114233	0.0054066	0.45	0.693	0.457763	0.709809	278	0.175968	0.0191073	0.789	0.966	0.791731	0.948095	0.0211423	MIC not significant	FALSE	FALSE	FALSE	FALSE	FALSE	FALSE	FALSE	FALSE
pcodonATTGAC	1343	0.104462	0.00428225	0.511	0.768	0.546352	0.776382	49	0.322848	0.0625893	0.28	0.603	0.309908	0.622089	0.082966	MIC not significant	FALSE	FALSE	FALSE	FALSE	FALSE	FALSE	FALSE	FALSE
pcodonATTGAA	1343	0.119296	2.99123e-06	0.076	0.062	0.0718558	0.0567633	145	0.234583	0.0136711	0.269	0.345	0.287804	0.377785	0.161343	MIC not significant	FALSE	FALSE	FALSE	FALSE	FALSE	FALSE	FALSE	FALSE
pcodonATTGAG	1343	0.106344	0.00133483	0.54	0.58	0.572221	0.602302	115	0.224495	0.00865887	0.647	0.645	0.66027	0.661908	0.3226	MIC not significant	FALSE	FALSE	FALSE	FALSE	FALSE	FALSE	FALSE	FALSE
pcodonATTGGT	1343	0.113822	0.000775525	0.51	0.519	0.528362	0.531474	337	0.200676	0.00586008	0.141	0.185	0.140311	0.186968	0.160877	MIC not significant	FALSE	FALSE	FALSE	FALSE	FALSE	FALSE	FALSE	FALSE
[truncated: 1,693 more rows]

## Sheet: Description
Column name	Description
Name	The name of the feature
[truncated: 24 more rows]
