# Supplementary material for: Most associations between transcript features and gene expression are monotonic
Source: Royal Society of Chemistry journal article supplement (doi:10.1039/c3mb70617f), 2014-03-17
Supplement: c3mb70617f6.xlsx [file c3mb70617f6.xlsx]

## Sheet: mRNA
	MIC not significant	Monotone	Non-monotone	non-significant monotone/non-monotone	Insufficient data	Grand Total
Amino acid pair usage	94	266	3	37		400
Amino acid usage	6	7	4	3		20
ATG-related	81	66	5	21		173
CAI	60	35	1	5		101
codon pair usage	2233	807	3	397	656	4096
Codon usage	11	25	5	23		64
Evolutionary rates		3				3
GC Content	100	4	3	5		112
Length of the transcript segments	1	2		1		4
length ratios		2		1		3
Measured Folding Energy (PARS)		12	5	1		18
Number of Base Pairs	4					4
Predicted Folding Energy	65	8	5	31	3	112
sORF-related	63	46	4	7		120
tAI	73	2	6	20		101
TASEP		1				1
uORF-related	94		4	2		100
Grand Total	2885	1286	48	554	659	5432

## Sheet: RD
	MIC not significant	Monotone	Non-monotone	non-significant monotone/non-monotone	Insufficient data	Grand Total
Amino acid pair usage	168	133	7	92		400
Amino acid usage	2	7	7	4		20
ATG-related	82	72	3	16		173
CAI	53	35	1	12		101
codon pair usage	3033	51	63	253	696	4096
Codon usage	11	29	6	18		64
Evolutionary rates	1	2				3
GC Content	48	20	3	41		112
Length of the transcript segments	1	2		1		4
length ratios		2		1		3
Measured Folding Energy (PARS)		15	2	1		18
Number of Base Pairs	2			2		4
Predicted Folding Energy	82	5	1	21	3	112
sORF-related	59	51	3	7		120
tAI	78	9	2	12		101
TASEP		1				1
uORF-related	80		17	3		100
Grand Total	3700	434	115	484	699	5432

## Sheet: PPR
	MIC not significant	Monotone	Non-monotone	non-significant monotone/non-monotone	Insufficient data	Grand Total
Amino acid pair usage	100	241	2	57		400
Amino acid usage	12	2	2	4		20
ATG-related	139	13	3	9	9	173
CAI	88	1	8	4		101
codon pair usage	1661	615	1	75	1744	4096
Codon usage	28	24	2	10		64
Evolutionary rates	2			1		3
GC Content	96	2	3	11		112
Length of the transcript segments	1	2		1		4
length ratios	1	2				3
Measured Folding Energy (PARS)	12	3		3		18
Number of Base Pairs	2	1	1			4
Predicted Folding Energy	92		10	7	3	112
sORF-related	72	44		4		120
tAI	92			9		101
TASEP		1				1
uORF-related	70				30	100
Grand Total	2468	951	32	195	1786	5432

## Sheet: PA
	MIC not significant	Monotone	Non-monotone	non-significant monotone/non-monotone	Insufficient data	Grand Total
Amino acid pair usage	367	17	7	9		400
Amino acid usage	10	5	1	4		20
ATG-related	88	56	2	18	9	173
CAI	51	35	11	4		101
codon pair usage	2311	16	24	36	1709	4096
Codon usage	7	42	1	14		64
Evolutionary rates	1	2				3
GC Content	95	2	7	8		112
Length of the transcript segments	2			2		4
length ratios	2			1		3
Measured Folding Energy (PARS)		12	4	2		18
Number of Base Pairs	4					4
Predicted Folding Energy	94	4		11	3	112
sORF-related	101	1	4	14		120
tAI	74	2	8	17		101
TASEP		1				1
uORF-related	70				30	100
Grand Total	3277	195	69	140	1751	5432

## Sheet: Features description
Category	count	Feature	Description
GC Content	112	GC Content	The percentage of nitrogenous bases on a DNA molecule that are either guanine or cytosine - Default value is zero, GC content is normalized by sequence length
			5'UTR: entire 5'UTR and last 40nt of the 5'UTR (2 features) - takes the minimum of 5'UTR length and 40nt
			ORF: entire ORF, and first 100 sliding windows of length 40nt of the ORF (slide of 1nt) (101 features)
			3'UTR: entire 3'UTR and first 40nt of the 3'UTR (2 features)
			ALL: Across entire sequence; last 40nt of 5'UTR and first 40nt of ORF; entire 5'UTR and first 40nt of ORF; entire 5'UTR and entire ORF
			last 40nt of ORF and first 40nt of 3'UTR; last 40nt of ORF and entire 3'UTR; entire ORF and entire 3'UTR (7 features)
Predicted Folding Energy	112	Predicted Folding Energy	Rnafold predicts the secondary structure associated with the minimum free energy using the thermodynamic nearest-neighbor approach
			5'UTR: average over sliding windows of entire 5'UTR and last 40nt of the 5'UTR (2 features) - default is NaN for sequences shorter than 20nt
			ORF: average over sliding windows of length 40nt across entire ORF, and first 100 sliding windows of length 40nt of the ORF (slide of 1nt) (101 features) - default is NaN for sequences shorter than 40nt
			3'UTR: average over sliding windows of entire 3'UTR and first 40nt of the 3'UTR (2 features) - default is NaN for sequences shorter than 40nt (there are none like this)
			ALL: average over sliding windows across entire sequence; last 40nt of 5'UTR and first 40nt of ORF; entire 5'UTR and first 40nt of ORF; entire 5'UTR and entire ORF
			last 40nt of ORF and first 40nt of 3'UTR; last 40nt of ORF and entire 3'UTR; entire ORF and entire 3'UTR (7 features)
ATG-related	64	Max/Mean ATG Context Score	A measure based on the ATG context of the start codon, for all frames seperately and together - Default value is 10 orders of magnitude less than the worse score
			5'UTR: across the entire 5'UTR, and last 30 codons (16 features)
			ORF: across entire ORF , first 200 codons and first 30 codons (24 features)
			3'UTR: across the entire 3'UTR, (for first 30 codons there are too few features) (8 features)
			ALL: last 30 codons of 5'UTR and first 30 codons of ORF; last 30 codons of ORF and first 30 codons of 3'UTR (16 features)
ATG-related	64	Max/Mean relative ATG Context Score	The context score divided by the context score of the main start ATG of the ORF, for all frames seperately and together - Default value is 10 orders of magnitude less than the worse score
			5'UTR: across the entire 5'UTR, and last 30 codons (16 features)
			ORF: across entire ORF , first 200 codons and first 30 codons (24 features)
			3'UTR: across the entire 3'UTR, (for first 30 codons there are too few features) (8 features)
			ALL: last 30 codons of 5'UTR and first 30 codons of ORF; last 30 codons of ORF and first 30 codons of 3'UTR (16 features)
ATG-related	32	Number of ATGs	For all frames seperately and together - Default value is 0
			5'UTR: across the entire 5'UTR, and last 30 codons (8 features)
			ORF: across entire ORF , first 200 codons and first 30 codons (12 features)
			3'UTR: across the entire 3'UTR, (for first 30 codons there are too few features) (4 features)
			ALL: last 30 codons of 5'UTR and first 30 codons of ORF; last 30 codons of ORF and first 30 codons of 3'UTR (8 features)
ATG-related	12	Distance of 1st ATG in the transcript segment from the main START ATG in the ORF	For all frames seperately and together - Default value is 100000
			Across the entire 5'UTR, ORF and 3'UTR respectively (12 features (4 respectively))
Length of the transcript segments	4	Length of the transcript segments
			5'UTR/ORF/3'UTR/Entire sequence (4 features respectively)
uORF-related	20	The number of uORFs in the UTRs	An Upstream Open Reading Frame (uORF) is a very short Open Reading Frame (ORF) within the UTR, for all frames seperately and together - Default value is zero
			5'UTR: across the entire 5'UTR, and last 30 codons (8 features)
			3'UTR: across the entire 3'UTR, (for first 30 codons there are too few features) (4 features)
			ALL: across the entire 5'UTR allowing ending in the ORF; and last 30 codons allowing ending in the ORF (8 features)
uORF-related	40	The max/mean length of uORFs	for all frames seperately and together - Default value is zero
			5'UTR: across the entire 5'UTR, and last 30 codons (16 features)
			3'UTR: across the entire 3'UTR, (for first 30 codons there are too few features) (8 features)
			ALL: across the entire 5'UTR and last 30 codons allowing ending in the ORF (16 features)
uORF-related	40	The max/mean metabolic cost (ATP) for the AA synthesis of uORFs	for all frames seperately and together - Default value is zero
			5'UTR: across the entire 5'UTR, and last 30 codons (16 features)
			3'UTR: across the entire 3'UTR, (for first 30 codons there are too few features) (8 features)
			ALL: across the entire 5'UTR and last 30 codons allowing ending in the ORF (16 features)
sORF-related	24	The number of shifted ORFs (sORFs) in the coding sequence	The number of shifted truncated ORFs, starting with an alternative ATG and terminating with a stop codon, for all frames seperately and together - Default value is zero
			ORF: across entire ORF , first 200 codons and first 30 codons (12 features)
			ALL: across entire ORF , first 200 codons and first 30 codons allowing ending in the 3'UTR (12 features)
sORF-related	48	The max/mean length of sORFs	For all frames seperately and together - Default value is zero
			ORF: across entire ORF , first 200 codons and first 30 codons (24 features)
			ALL: across entire ORF , first 200 codons and first 30 codons allowing ending in the 3'UTR (24 features)
sORF-related	48	The max/mean metabolic cost (ATP) for the AA synthesis of sORFs	For all frames seperately and together - Default value is zero
			ORF: across entire ORF , first 200 codons and first 30 codons (24 features)
			ALL: across entire ORF , first 200 codons and first 30 codons allowing ending in the 3'UTR (24 features)
Number of Base Pairs	4	Number of Base Pairs	Based on the bracket notation of the measured folding energy (PARS) - Default value is zero
			Across the entire 5'UTR, ORF and 3'UTR and entire sequence respectively (4 features respectively)
tAI	101	Coding sequence tAI	The tRNA Adaptation Index gauges the availability of the different tRNA molecules for each codon
			ORF: across entire ORF, and first 100 sliding windows of length 40nt of the ORF (slide of 1nt) (101 features)
CAI	101	Coding sequence CAI	A simple effective measure of synonymous codon usage bias
			ORF: across entire ORF, and first 100 sliding windows of length 40nt of the ORF (slide of 1nt) (101 features)
ATG-related	1	ATG context score of the main START ATG of the ORF
			Relevant only to the ORF and ALL regressor (1 feature)
TASEP	1	TASEP translation rate prediction	Totally Asymmetric Simple Exclusion Process (TASEP) Translation elongation model which predicts the translation rate of a coding sequemce based on the biophysical stochastic nature of the process
			Relevant only to the ORF and ALL regressor (1 feature)
Evolutionary rates	3	Evolutionary rates	dn, ds, dn/ds
			Relevant only to the ORF and ALL regressor (3 features)
Codon usage	64	Codon Bias	Frequency of each codon per gene
			Relevant only to the ORF and ALL regressor (64 features)
codon pair usage	4096	Codon Bias Pairs	Frequency of consecutive codon pairs per gene
			Relevant only to the ORF and ALL regressor (4096 features)
Amino acid usage	20	Amino Acid Bias	Frequency of each amino acid per gene
			Relevant only to the ORF and ALL regressor (20 features)
Amino acid pair usage	400	Amino Acid Bias Pairs	Frequency of consecutive amino acid pairs per gene
			Relevant only to the ORF and ALL regressor (400 features)
Measured Folding Energy (PARS)	26	Measured Folding Energy (PARS)	The PARS score and the exponent of the PARS score - Relevant only to ALL regressor - Default value is NaN
			Average across the 5'UTR, ORF, 3'UTR and entire transcript (8 features)
			Average for first 40nt of the ORF; last 40nt of 5'UTR; last 40nt of 5'UTR and first 40nt of ORF; entire 5'UTR and first 40nt of ORF; entire 5'UTR and entire ORF (10 features)
			first 40nt of 3'UTR; first 40nt of ORF and first 40nt of 3'UTR; first 40nt of ORF entire 3'UTR; entire ORF and entire 3'UTR (8 features)
length ratios	1	The ratio of the length of 5'UTR to the ORF	Relevant only to the ALL regressor
			(1 feature)
length ratios	1	The ratio of the length of 3'UTR to the ORF	Relevant only to the ALL regressor
			(1 feature)
length ratios	1	The ratio of the length of 5'UTR to the 3'UTR	Relevant only to the ALL regressor
			(1 feature)
		Regressor	Total number of features
		5'UTR	90 features
		ORF	5115 features
		3'UTR	50 features
		ALL	5432 features
